# Supplementary material for: Upregulated type I interferon responses in asymptomatic COVID-19 infection are associated with improved clinical outcome
Source: PubMed Central journal article supplement (PMC8617268; doi:10.1038/s41598-021-02489-4), 2021-11-25
Supplement: 41598_2021_2489_MOESM1_ESM.pdf [file 41598_2021_2489_MOESM1_ESM.pdf]

## Upregulated type I interferon responses in asymptomatic COVID-19 infection are associated with improved clinical outcome

**Supplementary Figure 1. Suppression of T cell activation in severe COVID-19 cases.** We investigated differential regulation of transcriptional pathways between severe COVID-19 (n=20) and healthy controls (n=11) using RNAseq data from a published data set from Germany. A dotplot of GSEA on KEGG biological process applied on data from the study by Ashenbrenner et al. is displayed with pathways depicted on the y-axis and gene ratios on the x-axis. The size of circles in the dot plot is related to the increasing number of genes involved in a pathway. Circles are colored based on a p-adjusted value for differential change between the groups studied.

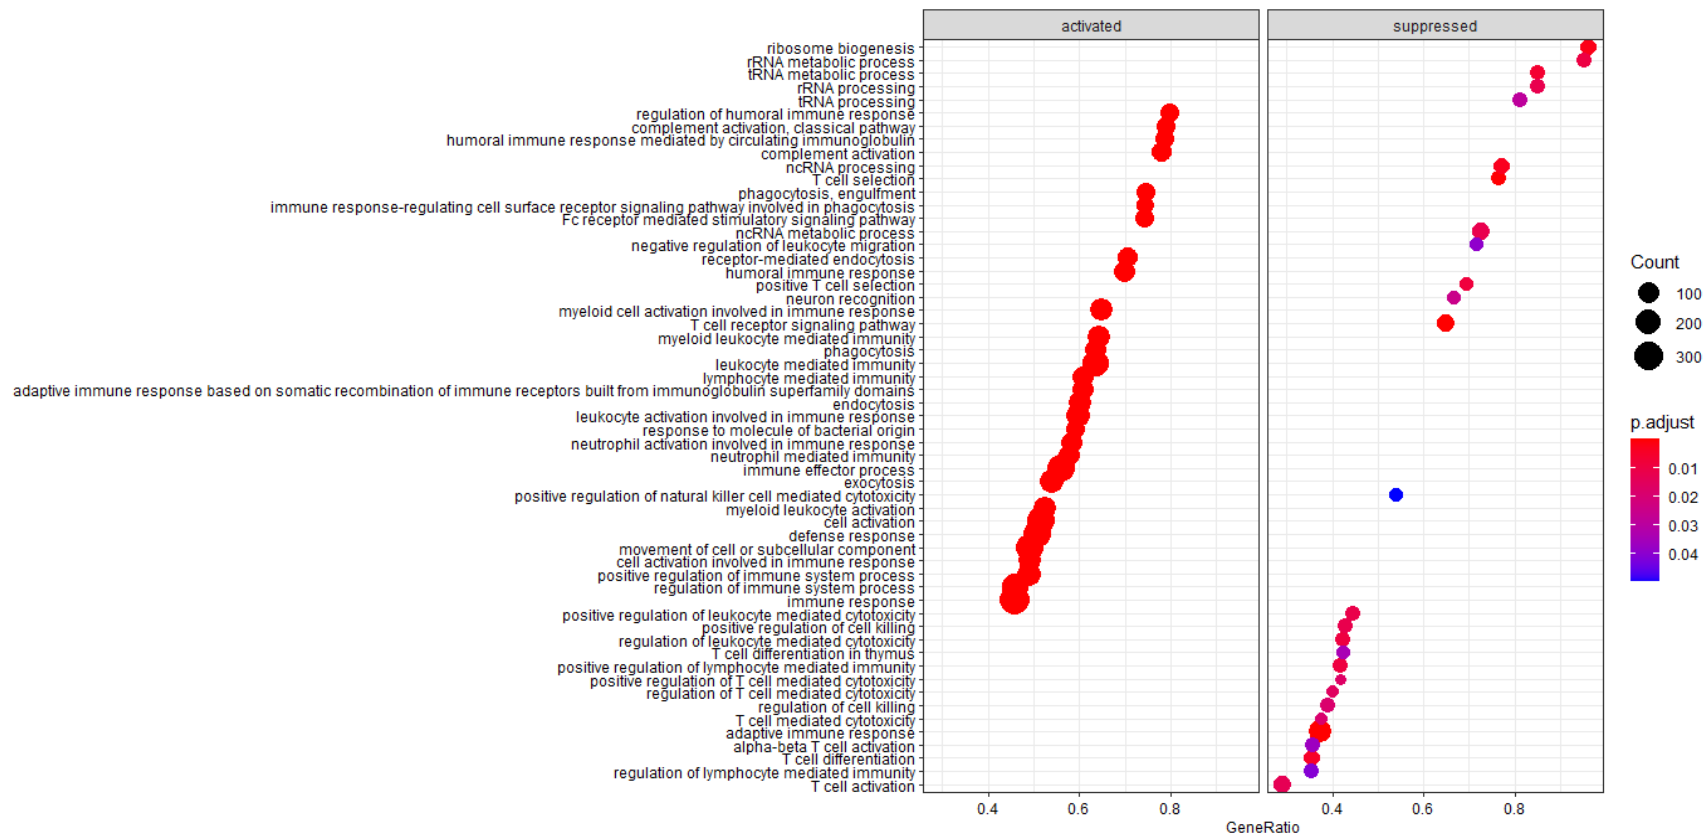

**Supplementary Figure 2. Enrichment plot of KEGG GSEA corona virus disease profile of the running enrichment score and position in the ranked list of genes.** A positive enrichment score is observed indicating co-relation with first phenotype. A green line is showing a running Enrichment score for the gene set the analysis walks down the ranked gene list and a maximum enrichment score is highlighted with a red dotted line. The blue rectangle shows a leading edge subset; these are the genes that appear in the ranked list prior to the peak score.

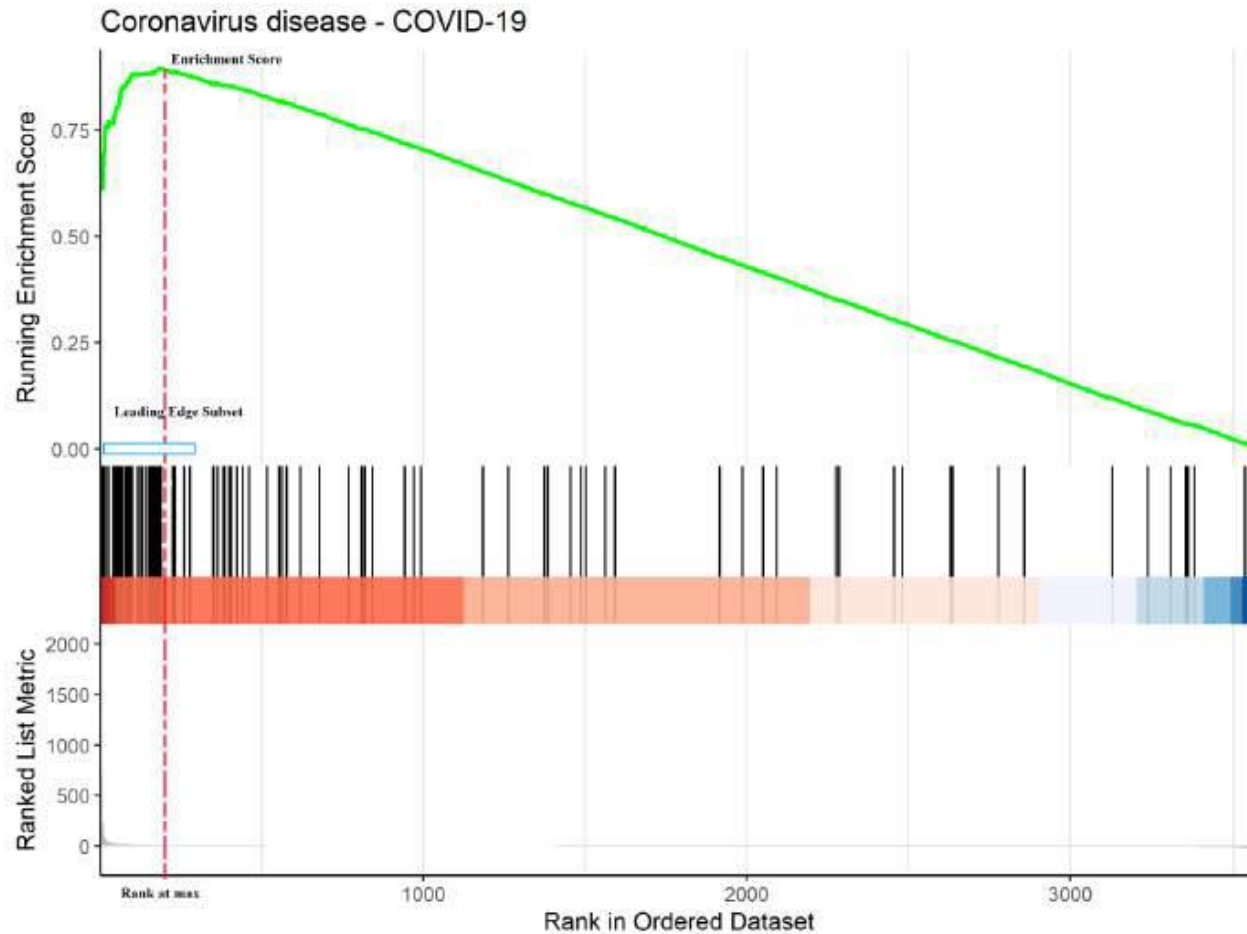

**Supplementary Table 1. Clinical description of Symptomatic COVID-19 cases**

| ID                  | Age (years) | Sex | WHO_score_admission | Severity | D dimer (mg/L FEU) | CRP (mg/L) | LDH (I.U/L)   | Ferritin (ng/mL) | WBC (4.8-11.3x10E9/L) | lymphocytes (17.5-45 %) | NLR  | Comorbids                                | WHO_score_discharge | Outcome   |
|---------------------|-------------|-----|---------------------|----------|--------------------|------------|---------------|------------------|-----------------------|-------------------------|------|------------------------------------------|---------------------|-----------|
| S1                  | 20-24       | F   | 4                   | mild     | 8.9                | 142.6      | 528.0         | 486.3            | 3.6                   | 33.0                    | 1.8  | NA                                       | 2                   | discharge |
| S9                  | 44 - 49     | M   | 4                   | mild     | 0.4                | 200.0      | 47.2          | 368.9            | 16.1                  | 18.8                    | 4.2  | DM, HTN, IHD                             | 2                   | discharge |
| S3                  | 55 - 59     | M   | 4                   | mild     | 1.1                | 73.8       | 436.0         | 180.4            | 3.8                   | 27.2                    | 4.1  | DM HTN                                   | 2                   | discharge |
| S10                 | 55 - 59     | M   | 5                   | severe   | 0.6                | 254.8      | 570.0         | 1758.6           | 9.8                   | 14.9                    | 3.4  | DM, HTN, IHD                             | 2                   | discharge |
| S11                 | 55 - 59     | F   | 5                   | severe   | 1                  | 6.3        | 3792.0        | 1393.2           | 10.1                  | 7.0                     | 2.0  | HTN, chronic atrial fibrillation, asthma | 2                   | discharge |
| S4                  | 60 - 64     | M   | 5                   | severe   | 3.2                | 201.0      | 354.0         | 639.5            | 9.0                   | 9.5                     | 10.8 | DM HTN                                   | 8                   | deceased  |
| S6                  | 65 - 69     | M   | 5                   | severe   | NA                 | 196.9      | 9.6           | 1797.1           | 12.3                  | 7.5                     | 8.3  | HTN, IHD                                 | 8                   | deceased  |
| S7                  | 65 - 69     | M   | 5                   | severe   | 6.3                | 7.6        | 4.2           | 82.7             | 4.2                   | 20.2                    | 6.7  | DM, HTN, IHD (S/P CABG)                  | 8                   | deceased  |
| S2                  | 70 - 74     | M   | 6                   | severe   | >30                | 210.0      | 821.0         | 642.0            | 8.6                   | 30.6                    | 19.4 | DM HTN CAD                               | 8                   | deceased  |
| S8                  | 75 - 79     | M   | 7                   | severe   | >30                | 21.3       | 5309.0        |                  | 17.9                  | 17.8                    | 3.8  | NA                                       | 8                   | deceased  |
| S5                  | 80 - 84     | M   | 5                   | severe   | 4                  | 13.4       | 619.0         | 1771.1           | 11.2                  | 3.5                     | 30.3 | DM, IHD                                  | 8                   | deceased  |
| <b>normal range</b> |             |     |                     |          | <0.5 mg/L FEU      | 0-0.5mg/L  | 120-246 I.U/L | 22-322g/mL       | 4.8-11.3 x10E9/L      | 17.5-45%                | 1-4  |                                          |                     |           |

CRP, C-reactive protein; LDH, lactate dehydrogenase; NLR, neutrophil lymphocyte ratio; DM, diabetes mellitus type II; HTN, hypertension; IHD, ischemic heart disease; CAD, coronary heart disease; HTN, hypertension; ARDS, acute respiratory distress syndrome.

**Supplementary Table2. WHO Ordinal scale for clinical improvement in COVID-19<sup>#</sup>**

| Patient state               | Descriptor                                                                      | Score |
|-----------------------------|---------------------------------------------------------------------------------|-------|
| Uninfected                  | No clinical or virological evidence of infection                                | 0     |
| Ambulatory                  | No limitation of activities                                                     | 1     |
|                             | Limitation of activities                                                        | 2     |
| Hospitalized, mild Disease  | No oxygen therapy                                                               | 3     |
|                             | Oxygen by mask or nasal cannulae                                                | 4     |
| Hospitalized Severe Disease | Non-invasive ventilation or high-flow oxygen                                    | 5     |
|                             | Invasive mechanical ventilation without other organ support                     | 6     |
|                             | Invasive ventilation with other organ support (e.g., ECMO, CRRT, vassopressors) | 7     |
| Dead                        | Death                                                                           | 8     |

ECMO; extracorporeal membrane oxygenation; CRRT, continuous renal replacement therapy

<sup>#</sup>, Adapted from "WHO R&D Blueprint novel Coronavirus COVID-19 Therapeutic Trial Synopsis", World Health Organization, 2020.

Supplementary Table 3. Symptomatic versus Asymptomatic

#%result\_name=Analysis\_31

#%array\_type=Clariom\_S\_Human

#%annotation=Clariom\_S\_Human.r1.na36.hg38.a1.transcript.csv

#%comparison=Symp vs Asymp

| ID                | Symp Avg | Asymp Avg | Fold Chang | P-val    | FDR P-val | Gene Symb  | Description                                      | Group            |
|-------------------|----------|-----------|------------|----------|-----------|------------|--------------------------------------------------|------------------|
| TC1400008940.hg.1 | 19.16    | 12.28     | 117.7      | 1.94E-32 | 4.16E-28  | NFKBIA     | nuclear factor of kappa light polypeptide gene   | Multiple_Complex |
| TC0600009597.hg.1 | 19.2     | 11.78     | 170.91     | 1.26E-30 | 1.35E-26  | TNFAIP3    | tumor necrosis factor, alpha-induced protein     | Multiple_Complex |
| TC0100011453.hg.1 | 15.93    | 6.66      | 615.69     | 7.14E-30 | 5.10E-26  | GOS2       | G0/G1 switch 2                                   | Multiple_Complex |
| TC1000007990.hg.1 | 11.35    | 6.26      | 33.93      | 2.21E-26 | 1.18E-22  | DDIT4      | DNA damage inducible transcript 4                | Multiple_Complex |
| TC0800008801.hg.1 | 14.53    | 9.19      | 40.51      | 3.00E-25 | 1.29E-21  | TRIB1      | tribbles pseudokinase 1                          | Multiple_Complex |
| TC0900007977.hg.1 | 10.07    | 6.76      | 9.87       | 7.77E-25 | 2.78E-21  | CARD19     | caspase recruitment domain family, member        | Multiple_Complex |
| TC0600011386.hg.1 | 14.44    | 8.28      | 71.69      | 4.53E-24 | 1.39E-20  | IER3       | immediate early response 3                       | Coding           |
| TC1200009580.hg.1 | 7.44     | 10.86     | -10.73     | 3.35E-23 | 8.98E-20  | FBXL14     | F-box and leucine-rich repeat protein 14         | Multiple_Complex |
| TC0400007836.hg.1 | 17.23    | 6.2       | 2095.38    | 4.14E-23 | 9.88E-20  | CXCL8      | chemokine (C-X-C motif) ligand 8                 | Multiple_Complex |
| TC1900006588.hg.1 | 12.85    | 8.93      | 15.13      | 5.25E-23 | 1.13E-19  | GADD45B    | growth arrest and DNA-damage-inducible, bet      | Multiple_Complex |
| TC0300010775.hg.1 | 9.63     | 17.13     | -181.32    | 1.37E-22 | 2.67E-19  | CX3CR1     | chemokine (C-X3-C motif) receptor 1              | Coding           |
| TC0100017110.hg.1 | 9.34     | 15.39     | -66.39     | 1.77E-22 | 3.17E-19  | FCMR       | Fc fragment of IgM receptor                      | Multiple_Complex |
| TC1000006652.hg.1 | 12.51    | 7.6       | 30         | 2.13E-22 | 3.52E-19  | PFKFB3     | 6-phosphofructo-2-kinase/fructose-2,6-bipho      | Multiple_Complex |
| TC1200010866.hg.1 | 13.61    | 9.97      | 12.51      | 3.14E-22 | 4.80E-19  | CD63       | CD63 molecule                                    | Multiple_Complex |
| TC0300013855.hg.1 | 15.18    | 10.93     | 19.02      | 4.37E-22 | 6.25E-19  | NFKBIZ     | nuclear factor of kappa light polypeptide gene   | Multiple_Complex |
| TC0200007132.hg.1 | 15.55    | 10.45     | 34.29      | 7.94E-22 | 1.06E-18  | YPEL5      | yippee like 5                                    | Multiple_Complex |
| TC0100015975.hg.1 | 12.77    | 8.52      | 19.02      | 9.38E-22 | 1.15E-18  | RIT1       | Ras-like without CAAX 1                          | Multiple_Complex |
| TC1200012270.hg.1 | 12.15    | 9.02      | 8.76       | 9.62E-22 | 1.15E-18  | RILPL2     | Rab interacting lysosomal protein-like 2         | Multiple_Complex |
| TC0100008105.hg.1 | 9.32     | 6.03      | 9.84       | 1.81E-21 | 2.04E-18  | PLK3       | polo-like kinase 3                               | Multiple_Complex |
| TC1700007944.hg.1 | 6.79     | 9.96      | -9.03      | 2.17E-21 | 2.33E-18  | TMEM106A   | transmembrane protein 106A                       | Multiple_Complex |
| TC2100007599.hg.1 | 15.34    | 9.17      | 72.34      | 2.94E-21 | 3.01E-18  | SAMSN1     | SAM domain, SH3 domain and nuclear localiz       | Multiple_Complex |
| TC1200008057.hg.1 | 15.14    | 10.92     | 18.58      | 3.44E-21 | 3.36E-18  | IRAK3; MIR | interleukin 1 receptor associated kinase 3; mic  | Multiple_Complex |
| TC0700007480.hg.1 | 12.67    | 4.86      | 224.42     | 3.74E-21 | 3.49E-18  | ABCA13     | Memczak2013 ALT_ACCEPTOR, ALT_DONOR,             | NonCoding        |
| TC0900010769.hg.1 | 15.51    | 10.18     | 40.14      | 4.39E-21 | 3.92E-18  | NFIL3      | nuclear factor, interleukin 3 regulated          | Coding           |
| TC0600007012.hg.1 | 11.01    | 6.49      | 22.96      | 5.32E-21 | 4.57E-18  | CD83       | CD83 molecule                                    | Multiple_Complex |
| TC0700013383.hg.1 | 12.59    | 8.06      | 23.18      | 5.69E-21 | 4.69E-18  | RABGEF1    | RAB guanine nucleotide exchange factor (GEF)     | Multiple_Complex |
| TC1600011505.hg.1 | 13.47    | 16.62     | -8.86      | 7.50E-21 | 5.96E-18  | NPIPBA     | nuclear pore complex interacting protein fami    | Multiple_Complex |
| TC0100015265.hg.1 | 7.06     | 11.99     | -30.51     | 8.10E-21 | 6.21E-18  | DENND2D    | DENN/MADD domain containing 2D                   | Multiple_Complex |
| TC0900011177.hg.1 | 13.89    | 8.04      | 57.74      | 1.29E-20 | 9.57E-18  | TXN        | thioredoxin                                      | Multiple_Complex |
| TC1500010184.hg.1 | 17.96    | 8.93      | 523.07     | 1.40E-20 | 9.99E-18  | BCL2A1     | BCL2-related protein A1                          | Coding           |
| TC1500009056.hg.1 | 8.22     | 12.22     | -16.07     | 1.46E-20 | 1.01E-17  | RASGRP1    | RAS guanyl releasing protein 1 (calcium and D    | Multiple_Complex |
| TC0100014349.hg.1 | 8.84     | 4.21      | 24.82      | 1.52E-20 | 1.02E-17  | JUN        | jun proto-oncogene                               | Multiple_Complex |
| TC1300007161.hg.1 | 10.01    | 7.23      | 6.87       | 1.58E-20 | 1.02E-17  | CDADC1     | cytidine and dCMP deaminase domain contain       | Multiple_Complex |
| TC0200008536.hg.1 | 6.63     | 10.4      | -13.63     | 1.77E-20 | 1.12E-17  | ANKRD36    | Transcript Identified by AceView, Entrez Gene    | Unassigned       |
| TC0X00009256.hg.1 | 11.31    | 8.49      | 7.09       | 2.89E-20 | 1.77E-17  | KLHL15     | kelch-like family member 15                      | Coding           |
| TC0500012842.hg.1 | 18.31    | 11.63     | 102.49     | 3.49E-20 | 2.08E-17  | DUSP1      | dual specificity phosphatase 1                   | Multiple_Complex |
| TC0500013238.hg.1 | 9.38     | 5.92      | 10.95      | 4.62E-20 | 2.68E-17  | ZMAT2      | zinc finger, matrin-type 2                       | Coding           |
| TC0300010770.hg.1 | 10.54    | 6.3       | 18.87      | 5.73E-20 | 3.24E-17  | CSRNP1     | cysteine-serine-rich nuclear protein 1           | Multiple_Complex |
| TC0800010607.hg.1 | 17.86    | 12.31     | 46.77      | 7.43E-20 | 4.09E-17  | ASPH       | aspartate beta-hydroxylase                       | Multiple_Complex |
| TC2100007140.hg.1 | 14.08    | 9.69      | 21.03      | 1.13E-19 | 6.07E-17  | ETS2       | v-ets avian erythroblastosis virus E26 oncogen   | Multiple_Complex |
| TC0700006928.hg.1 | 12.54    | 9.02      | 11.48      | 1.20E-19 | 6.30E-17  | CCDC126    | coiled-coil domain containing 126                | Multiple_Complex |
| TC0100007832.hg.1 | 11.45    | 8.37      | 8.45       | 1.62E-19 | 8.28E-17  | ZC3H12A; ↑ | zinc finger CCCH-type containing 12A; microR     | Multiple_Complex |
| TC1900008881.hg.1 | 13.78    | 8.56      | 37.47      | 1.84E-19 | 9.19E-17  | FCAR       | Fc fragment of IgA receptor                      | Multiple_Complex |
| TC1900008496.hg.1 | 11.46    | 7.21      | 19.07      | 2.04E-19 | 9.93E-17  | PPP1R15A   | protein phosphatase 1, regulatory subunit 15/    | Multiple_Complex |
| TC1100009200.hg.1 | 11.02    | 15.93     | -30.08     | 2.48E-19 | 1.18E-16  | CD3E       | CD3e molecule, epsilon (CD3-TCR complex)         | Multiple_Complex |
| TC1200012648.hg.1 | 14.3     | 9         | 39.28      | 3.70E-19 | 1.73E-16  | MYL6       | myosin light chain 6                             | Multiple_Complex |
| TC0100016135.hg.1 | 8.41     | 13.7      | -39.17     | 4.57E-19 | 2.09E-16  | SLAMF6     | SLAM family member 6                             | Coding           |
| TC0500012179.hg.1 | 11.32    | 8.04      | 9.69       | 4.79E-19 | 2.10E-16  | ETF1       | eukaryotic translation termination factor 1      | Multiple_Complex |
| TC1600011501.hg.1 | 12.2     | 15.09     | -7.43      | 4.81E-19 | 2.10E-16  | NPIPBA     | nuclear pore complex interacting protein fami    | Multiple_Complex |
| TC0200012854.hg.1 | 16.23    | 13.11     | 8.71       | 7.76E-19 | 3.33E-16  | RAB1A      | RAB1A, member RAS oncogene family                | Multiple_Complex |
| TC0700008360.hg.1 | 8.93     | 11.69     | -6.74      | 8.06E-19 | 3.39E-16  | CASD1      | CAS1 domain containing 1                         | Multiple_Complex |
| TC1300009249.hg.1 | 7.74     | 11.64     | -14.86     | 8.92E-19 | 3.66E-16  | KLF12      | Kruppel-like factor 12                           | Multiple_Complex |
| TC1600009958.hg.1 | 12.27    | 15.2      | -7.62      | 9.06E-19 | 3.66E-16  | NPIPBA     | nuclear pore complex interacting protein fami    | Multiple_Complex |
| TC0500009046.hg.1 | 4.31     | 7.94      | -12.33     | 9.99E-19 | 3.97E-16  | ADRB2      | adrenoceptor beta 2, surface                     | Coding           |
| TC1400008193.hg.1 | 8.42     | 12.27     | -14.34     | 1.09E-18 | 4.23E-16  | EVL        | Enah/Vasp-like                                   | Multiple_Complex |
| TC0100008094.hg.1 | 9.55     | 11.26     | -3.28      | 1.18E-18 | 4.51E-16  | RNF220     | ring finger protein 220                          | Multiple_Complex |
| TC0500007138.hg.1 | 11.38    | 17.57     | -72.95     | 1.34E-18 | 5.03E-16  | IL7R       | interleukin 7 receptor                           | Multiple_Complex |
| TC0100017072.hg.1 | 12.03    | 15.67     | -12.43     | 1.49E-18 | 5.52E-16  | ELK4       | ELK4, ETS-domain protein (SRF accessory prot     | Multiple_Complex |
| TC1400007706.hg.1 | 10.46    | 6.43      | 16.38      | 1.83E-18 | 6.64E-16  | FOS        | FBJ murine osteosarcoma viral oncogene hom       | Multiple_Complex |
| TC0400012811.hg.1 | 8.31     | 10.67     | -5.12      | 2.30E-18 | 8.21E-16  | DCK        | deoxycytidine kinase                             | Multiple_Complex |
| TC1900007096.hg.1 | 12.15    | 7.63      | 22.86      | 2.45E-18 | 8.60E-16  | JUNB       | jun B proto-oncogene                             | Multiple_Complex |
| TC0300009661.hg.1 | 12.7     | 8.08      | 24.51      | 2.83E-18 | 9.76E-16  | B3GNT5     | UDP-GlcNAc:betaGal beta-1,3-N-acetylglucose      | Multiple_Complex |
| TC2000009458.hg.1 | 6.38     | 10.64     | -19.13     | 2.87E-18 | 9.76E-16  | NFATC2     | nuclear factor of activated T-cells, cytoplasmic | Multiple_Complex |
| TC1600007353.hg.1 | 11       | 13.74     | -6.69      | 3.10E-18 | 1.04E-15  | NPIPBA     | nuclear pore complex interacting protein fami    | Coding           |

|                   |       |       |        |          |          |          |                                                                    |                  |
|-------------------|-------|-------|--------|----------|----------|----------|--------------------------------------------------------------------|------------------|
| TC1700011818.hg.1 | 9.02  | 6.6   | 5.37   | 3.42E-18 | 1.12E-15 | JMJD6    | jumonji domain containing 6                                        | Multiple_Complex |
| TC1500010743.hg.1 | 10.36 | 7.91  | 5.46   | 3.44E-18 | 1.12E-15 | MAPK6    | mitogen-activated protein kinase 6                                 | Multiple_Complex |
| TC1300006729.hg.1 | 10.15 | 6.61  | 11.64  | 3.73E-18 | 1.20E-15 | POMP     | proteasome maturation protein                                      | Multiple_Complex |
| TC1000008961.hg.1 | 6.28  | 8.74  | -5.52  | 3.95E-18 | 1.23E-15 | NHLRC2   | NHL repeat containing 2                                            | Multiple_Complex |
| TC0300013380.hg.1 | 8.8   | 11.5  | -6.5   | 3.96E-18 | 1.23E-15 | ALG3     | ALG3, alpha-1,3- mannosyltransferase                               | Multiple_Complex |
| TC2200009272.hg.1 | 7.68  | 10.4  | -6.59  | 4.55E-18 | 1.39E-15 | APOBEC3D | apolipoprotein B mRNA editing enzyme, catalytic                    | Coding           |
| TC1400010619.hg.1 | 18.03 | 14.48 | 11.72  | 4.72E-18 | 1.43E-15 | HIF1A    | hypoxia inducible factor 1, alpha subunit (basic helix-loop-helix) | Multiple_Complex |
| TC2200007783.hg.1 | 9.01  | 6.41  | 6.04   | 4.81E-18 | 1.43E-15 | PIM3     | Pim-3 proto-oncogene, serine/threonine kinase                      | Multiple_Complex |
| TC2000009180.hg.1 | 10.58 | 7.68  | 7.49   | 5.72E-18 | 1.68E-15 | OSER1    | oxidative stress responsive serine-rich 1                          | Coding           |
| TC1700010630.hg.1 | 9.73  | 14.91 | -36.37 | 5.81E-18 | 1.68E-15 | CCR7     | chemokine (C-C motif) receptor 7                                   | Coding           |
| TC0100013348.hg.1 | 10.61 | 6.85  | 13.54  | 6.81E-18 | 1.95E-15 | SYF2     | SYF2 pre-mRNA-splicing factor                                      | Multiple_Complex |
| TC1200010968.hg.1 | 8.18  | 5.27  | 7.53   | 7.41E-18 | 2.08E-15 | DDIT3    | DNA-damage-inducible transcript 3                                  | Coding           |
| TC0700013605.hg.1 | 12.52 | 8.56  | 15.58  | 7.47E-18 | 2.08E-15 | PNPLA8   | patatin-like phospholipase domain containing 8                     | Multiple_Complex |
| TC2200009271.hg.1 | 10.94 | 14.46 | -11.47 | 7.88E-18 | 2.17E-15 | APOBEC3C | apolipoprotein B mRNA editing enzyme, catalytic                    | Multiple_Complex |
| TC1200010850.hg.1 | 6.8   | 11.24 | -21.79 | 8.16E-18 | 2.22E-15 | TESPA1   | thymocyte expressed, positive selection associated                 | Multiple_Complex |
| TC1900011657.hg.1 | 11.44 | 7.33  | 17.31  | 8.65E-18 | 2.32E-15 | MCEMP1   | mast cell-expressed membrane protein 1                             | Multiple_Complex |
| TC1300009765.hg.1 | 11.49 | 6.72  | 27.3   | 9.08E-18 | 2.40E-15 | IRS2     | insulin receptor substrate 2                                       | Multiple_Complex |
| TC0600008863.hg.1 | 7.07  | 10.56 | -11.28 | 1.02E-17 | 2.68E-15 | MANEA    | mannosidase, endo-alpha                                            | Multiple_Complex |
| TC0200008556.hg.1 | 6.94  | 9.93  | -7.97  | 1.10E-17 | 2.84E-15 | ZAP70    | zeta chain of T cell receptor associated protein kinase            | Multiple_Complex |
| TC0800011334.hg.1 | 13.58 | 9.84  | 13.36  | 1.11E-17 | 2.84E-15 | KLF10    | Kruppel-like factor 10                                             | Multiple_Complex |
| TC1800007905.hg.1 | 9.56  | 11.92 | -5.15  | 1.25E-17 | 3.15E-15 | LPIN2    | lipin 2                                                            | Multiple_Complex |
| TC0400009936.hg.1 | 11.45 | 8.74  | 6.53   | 1.26E-17 | 3.15E-15 | GRPEL1   | GrpE-like 1, mitochondrial (E. coli)                               | Multiple_Complex |
| TC1100011602.hg.1 | 10.6  | 14.27 | -12.77 | 1.48E-17 | 3.65E-15 | UCP2     | uncoupling protein 2 (mitochondrial, proton carrier)               | Multiple_Complex |
| TC1700011121.hg.1 | 16.11 | 13.25 | 7.24   | 1.50E-17 | 3.65E-15 | TOB1     | transducer of ERBB2, 1                                             | Multiple_Complex |
| TC2200008637.hg.1 | 7.81  | 11.37 | -11.78 | 1.61E-17 | 3.89E-15 | IL2RB    | interleukin 2 receptor, beta                                       | Multiple_Complex |
| TC0700013491.hg.1 | 7.69  | 11.77 | -16.83 | 1.76E-17 | 4.19E-15 | GIMAP1-G | GIMAP1-GIMAP5 readthrough; GTPase, IMAP                            | Multiple_Complex |
| TC0600011173.hg.1 | 11.99 | 15.08 | -8.53  | 2.02E-17 | 4.77E-15 | GUSBP2   | glucuronidase, beta pseudogene 2                                   | Multiple_Complex |
| TC1300009330.hg.1 | 8.02  | 10.35 | -5.01  | 2.23E-17 | 5.20E-15 | RBM26    | RNA binding motif protein 26                                       | Multiple_Complex |
| TC1000011669.hg.1 | 11.17 | 13.85 | -6.41  | 2.75E-17 | 6.34E-15 | LDB1     | LIM domain binding 1                                               | Multiple_Complex |
| TC1000010870.hg.1 | 14.05 | 9.02  | 32.7   | 3.20E-17 | 7.31E-15 | SRGN     | Memczak2013 ANTISENSE, coding, INTERNAL                            | NonCoding        |
| TC0300011124.hg.1 | 6.21  | 10.25 | -16.39 | 3.30E-17 | 7.46E-15 | CISH     | cytokine inducible SH2-containing protein                          | Multiple_Complex |
| TC0200010362.hg.1 | 11.61 | 9.03  | 5.99   | 3.38E-17 | 7.54E-15 | COQ10B   | coenzyme Q10B                                                      | Multiple_Complex |
| TC1100007394.hg.1 | 11.53 | 9.12  | 5.32   | 3.42E-17 | 7.55E-15 | CD82     | CD82 molecule                                                      | Multiple_Complex |
| TC0700008494.hg.1 | 8.89  | 6.03  | 7.25   | 3.52E-17 | 7.71E-15 | BUD31    | BUD31 homolog                                                      | Multiple_Complex |
| TC1200012818.hg.1 | 7.98  | 5.83  | 4.43   | 3.80E-17 | 8.22E-15 | LLPH     | LLP homolog, long-term synaptic facilitation (LTP)                 | Coding           |
| TC2200008859.hg.1 | 10.65 | 6.6   | 16.6   | 4.28E-17 | 9.19E-15 | NDUFA6   | NADH dehydrogenase (ubiquinone) 1 alpha subunit                    | Multiple_Complex |
| TC1400007161.hg.1 | 5.19  | 8.73  | -11.69 | 4.35E-17 | 9.23E-15 | PTGDR    | prostaglandin D2 receptor (DP)                                     | Coding           |
| TC0200007895.hg.1 | 14.19 | 11.4  | 6.91   | 5.00E-17 | 1.05E-14 | PLEK     | pleckstrin                                                         | Multiple_Complex |
| TC0700013594.hg.1 | 6.68  | 9.18  | -5.63  | 6.35E-17 | 1.32E-14 | TRIM4    | tripartite motif containing 4                                      | Multiple_Complex |
| TC1600009916.hg.1 | 11.05 | 13.93 | -7.37  | 6.60E-17 | 1.36E-14 | NPIPB11  | nuclear pore complex interacting protein family 11                 | Coding           |
| TC1700009398.hg.1 | 7.25  | 4.58  | 6.35   | 7.10E-17 | 1.45E-14 | MIR22HG  | MIR22 host gene                                                    | Multiple_Complex |
| TC1100006831.hg.1 | 12.24 | 8.38  | 14.52  | 8.07E-17 | 1.63E-14 | ADM      | adrenomedullin                                                     | Coding           |
| TC1500009514.hg.1 | 6.97  | 9.42  | -5.46  | 8.12E-17 | 1.63E-14 | RFX7     | regulatory factor X, 7                                             | Multiple_Complex |
| TC0200011889.hg.1 | 15.7  | 13.55 | 4.43   | 9.17E-17 | 1.82E-14 | LAPTM4A  | lysosomal protein transmembrane 4 alpha                            | Multiple_Complex |
| TC1800006656.hg.1 | 13.65 | 11.2  | 5.46   | 9.89E-17 | 1.94E-14 | VAPA     | VAMP associated protein A                                          | Multiple_Complex |
| TC0100015856.hg.1 | 17.79 | 9.61  | 289.86 | 9.97E-17 | 1.94E-14 | S100A12  | S100 calcium binding protein A12                                   | Coding           |
| TC0300007335.hg.1 | 10.06 | 7.74  | 4.99   | 1.01E-16 | 1.95E-14 | TMA7     | translation machinery associated 7 homolog                         | Multiple_Complex |
| TC1200011791.hg.1 | 12.72 | 8.76  | 15.57  | 1.06E-16 | 2.03E-14 | CKAP4    | cytoskeleton-associated protein 4                                  | Multiple_Complex |
| TC0200007176.hg.1 | 7.61  | 9.62  | -4.02  | 1.14E-16 | 2.16E-14 | SLC30A6  | solute carrier family 30 (zinc transporter), member 6              | Multiple_Complex |
| TC1200010837.hg.1 | 7.2   | 3.98  | 9.35   | 1.21E-16 | 2.27E-14 | GPR84    | G protein-coupled receptor 84                                      | Coding           |
| TC0800007419.hg.1 | 9.69  | 7.56  | 4.37   | 1.23E-16 | 2.30E-14 | GPAT4    | glycerol-3-phosphate acyltransferase 4                             | Multiple_Complex |
| TC0700010005.hg.1 | 9.48  | 7.19  | 4.88   | 1.26E-16 | 2.33E-14 | ZFAND2A  | zinc finger, AN1-type domain 2A                                    | Multiple_Complex |
| TC0X00007704.hg.1 | 9.91  | 6.02  | 14.86  | 1.28E-16 | 2.35E-14 | COX7B    | cytochrome c oxidase subunit VIIb                                  | Multiple_Complex |
| TC0600011661.hg.1 | 11.17 | 13.16 | -3.99  | 1.35E-16 | 2.45E-14 | STK38    | serine/threonine kinase 38                                         | Multiple_Complex |
| TC0600011644.hg.1 | 8.72  | 6     | 6.57   | 1.37E-16 | 2.46E-14 | SRPK1    | SRSF protein kinase 1                                              | Multiple_Complex |
| TC1700010497.hg.1 | 9.31  | 12.05 | -6.69  | 1.41E-16 | 2.52E-14 | SYNRG    | synergins, gamma                                                   | Multiple_Complex |
| TC0100008152.hg.1 | 8.02  | 4.78  | 9.42   | 1.50E-16 | 2.65E-14 | UQCRH    | ubiquinol-cytochrome c reductase hinge protein                     | Multiple_Complex |
| TC0X00011139.hg.1 | 9.9   | 6.74  | 8.93   | 1.60E-16 | 2.81E-14 | CETN2    | centrin 2                                                          | Multiple_Complex |
| TC1000011050.hg.1 | 8.64  | 10.66 | -4.06  | 1.61E-16 | 2.81E-14 | AP3M1    | adaptor-related protein complex 3, mu 1 subunit                    | Multiple_Complex |
| TC1600010179.hg.1 | 11.64 | 9.33  | 4.98   | 1.76E-16 | 3.05E-14 | DNAJA2   | DnaJ (Hsp40) homolog, subfamily A, member 2                        | Multiple_Complex |
| TC0400010167.hg.1 | 8.51  | 10.57 | -4.18  | 2.02E-16 | 3.47E-14 | DCAF16   | DDB1 and CUL4 associated factor 16                                 | Multiple_Complex |
| TC0300009815.hg.1 | 9.33  | 11.61 | -4.85  | 2.29E-16 | 3.88E-14 | LPP      | LIM domain containing preferred translocation                      | Multiple_Complex |
| TC0900010607.hg.1 | 12.33 | 9.4   | 7.62   | 2.30E-16 | 3.88E-14 | AGTPBP1  | ATP/GTP binding protein 1                                          | Multiple_Complex |
| TC0700007477.hg.1 | 8.66  | 6.65  | 4.02   | 2.58E-16 | 4.32E-14 | UPP1     | uridine phosphorylase 1                                            | Multiple_Complex |
| TC1900010856.hg.1 | 12.81 | 8.74  | 16.78  | 2.98E-16 | 4.95E-14 | PLAUR    | plasminogen activator, urokinase receptor                          | Multiple_Complex |
| TC0X00010473.hg.1 | 15.06 | 11.85 | 9.21   | 3.14E-16 | 5.18E-14 | TSC22D3  | TSC22 domain family, member 3                                      | Coding           |
| TC0X00006625.hg.1 | 5.98  | 10.49 | -22.86 | 3.19E-16 | 5.22E-14 | TLR7     | toll-like receptor 7                                               | Multiple_Complex |
| TC0200015447.hg.1 | 12.85 | 10.11 | 6.68   | 3.43E-16 | 5.58E-14 | SUMO1    | small ubiquitin-like modifier 1                                    | Multiple_Complex |
| TC1000007925.hg.1 | 13.79 | 15.96 | -4.51  | 3.59E-16 | 5.78E-14 | EIF4EBP2 | eukaryotic translation initiation factor 4E binding                | Multiple_Complex |
| TC1000009296.hg.1 | 10.1  | 7.7   | 5.3    | 3.69E-16 | 5.90E-14 | PTPRE    | protein tyrosine phosphatase, receptor type, I                     | Multiple_Complex |

|                   |       |       |        |          |          |            |                                                  |                  |
|-------------------|-------|-------|--------|----------|----------|------------|--------------------------------------------------|------------------|
| TC0300010566.hg.1 | 6.22  | 9.01  | -6.87  | 3.72E-16 | 5.91E-14 | EOMES      | eomesodermin                                     | Coding           |
| TC0100015236.hg.1 | 10.09 | 7.01  | 8.44   | 4.16E-16 | 6.57E-14 | LAMTOR5    | late endosomal/lysosomal adaptor, MAPK anc       | Multiple_Complex |
| TC2100007254.hg.1 | 6.89  | 9.56  | -6.36  | 4.21E-16 | 6.59E-14 | UBASH3A    | ubiquitin associated and SH3 domain containi     | Multiple_Complex |
| TC0300011936.hg.1 | 10.86 | 13.21 | -5.08  | 4.30E-16 | 6.69E-14 | CD47       | CD47 molecule                                    | Multiple_Complex |
| TC1200012571.hg.1 | 8.66  | 11.39 | -6.64  | 4.37E-16 | 6.75E-14 | ITFG2      | integrin alpha FG-GAP repeat containing 2        | Multiple_Complex |
| TC0500008157.hg.1 | 11.29 | 13.58 | -4.92  | 4.41E-16 | 6.75E-14 | LNPEP      | leucyl/cystinyl aminopeptidase                   | Multiple_Complex |
| TC1100009191.hg.1 | 10.25 | 12.7  | -5.46  | 4.55E-16 | 6.92E-14 | IL10RA     | interleukin 10 receptor, alpha                   | Multiple_Complex |
| TC1900010651.hg.1 | 16.97 | 11.62 | 40.77  | 4.74E-16 | 7.16E-14 | GMFG       | glia maturation factor, gamma                    | Multiple_Complex |
| TC0100007552.hg.1 | 9.05  | 6.77  | 4.86   | 4.81E-16 | 7.22E-14 | SESN2      | sestrin 2                                        | Multiple_Complex |
| TC1600011417.hg.1 | 11.02 | 13.23 | -4.64  | 4.95E-16 | 7.37E-14 | NFATC3     | nuclear factor of activated T-cells, cytoplasmic | Multiple_Complex |
| TC0200008663.hg.1 | 16.47 | 9.51  | 123.89 | 5.18E-16 | 7.66E-14 | IL1R2      | interleukin 1 receptor, type II                  | Multiple_Complex |
| TC1200012583.hg.1 | 7.86  | 11.57 | -13.07 | 5.30E-16 | 7.79E-14 | CD27       | CD27 molecule                                    | Multiple_Complex |
| TC1700009637.hg.1 | 5.63  | 9.27  | -12.4  | 5.34E-16 | 7.79E-14 | PLSCR3; TM | phospholipid scramblase 3; transmembrane p       | Multiple_Complex |
| TC0700008786.hg.1 | 10.13 | 7.84  | 4.88   | 6.20E-16 | 8.98E-14 | DNAJB9     | DnaJ (Hsp40) homolog, subfamily B, member        | Multiple_Complex |
| TC1200009888.hg.1 | 8.37  | 4.74  | 12.37  | 6.28E-16 | 9.02E-14 | CLEC1B     | C-type lectin domain family 1, member B          | Coding           |
| TC0400012432.hg.1 | 12.25 | 7.48  | 27.28  | 6.31E-16 | 9.02E-14 | HMGB2      | high mobility group box 2                        | Multiple_Complex |
| TC1700008867.hg.1 | 9.74  | 12.2  | -5.49  | 6.38E-16 | 9.06E-14 | SLC9A3R1;  | solute carrier family 9, subfamily A (NHE3, cat  | Multiple_Complex |
| TC0400011013.hg.1 | 17.59 | 10.88 | 104.26 | 6.79E-16 | 9.58E-14 | PPBP       | pro-platelet basic protein                       | Coding           |
| TC0300011259.hg.1 | 7.32  | 9.79  | -5.57  | 8.34E-16 | 1.17E-13 | ARHGEF3    | Rho guanine nucleotide exchange factor 3         | Multiple_Complex |
| TC0X00008259.hg.1 | 8.1   | 5.32  | 6.86   | 8.43E-16 | 1.17E-13 | NDUFA1     | NADH dehydrogenase (ubiquinone) 1 alpha su       | Multiple_Complex |
| TC1600011364.hg.1 | 12.03 | 14.42 | -5.27  | 9.94E-16 | 1.38E-13 | NPIPBS     | nuclear pore complex interacting protein fami    | Multiple_Complex |
| TC1700012353.hg.1 | 8.48  | 5.44  | 8.24   | 1.04E-15 | 1.42E-13 | PER1; MIR6 | period circadian clock 1; microRNA 6883          | Multiple_Complex |
| TC0200010502.hg.1 | 8.68  | 11.55 | -7.33  | 1.04E-15 | 1.42E-13 | FAM117B    | family with sequence similarity 117, member      | Multiple_Complex |
| TC1200008675.hg.1 | 10.03 | 8.42  | 3.05   | 1.04E-15 | 1.42E-13 | TXNRD1     | thioredoxin reductase 1                          | Multiple_Complex |
| TC1500009079.hg.1 | 12.1  | 7.95  | 17.74  | 1.06E-15 | 1.43E-13 | SRP14      | signal recognition particle 14kDa                | Multiple_Complex |
| TC0100010032.hg.1 | 19.48 | 14.93 | 23.47  | 1.06E-15 | 1.43E-13 | S100A9     | S100 calcium binding protein A9                  | Multiple_Complex |
| TC0200009074.hg.1 | 7.19  | 10.15 | -7.79  | 1.10E-15 | 1.47E-13 | PTPN4      | protein tyrosine phosphatase, non-receptor ty    | Multiple_Complex |
| TC0700008351.hg.1 | 8.63  | 4.75  | 14.69  | 1.15E-15 | 1.53E-13 | GNG11      | guanine nucleotide binding protein (G protein    | Multiple_Complex |
| TC0500008684.hg.1 | 6.54  | 10.32 | -13.72 | 1.23E-15 | 1.62E-13 | TCF7       | transcription factor 7 (T-cell specific, HMG-bo  | Multiple_Complex |
| TC0700009886.hg.1 | 12.21 | 9.91  | 4.91   | 1.26E-15 | 1.64E-13 | DNAJB6     | DnaJ (Hsp40) homolog, subfamily B, member        | Multiple_Complex |
| TC1000012567.hg.1 | 9.01  | 11    | -3.96  | 1.30E-15 | 1.69E-13 | AGAP5      | ArfGAP with GTPase domain, ankyrin repeat a      | Multiple_Complex |
| TC0100016694.hg.1 | 12.13 | 9.09  | 8.26   | 1.38E-15 | 1.78E-13 | IVNS1ABP   | influenza virus NS1A binding protein             | Multiple_Complex |
| TC0600008099.hg.1 | 5.24  | 7.14  | -3.72  | 1.48E-15 | 1.90E-13 | POLH       | polymerase (DNA directed), eta                   | Multiple_Complex |
| TC1600006658.hg.1 | 9.34  | 13.33 | -15.84 | 1.52E-15 | 1.94E-13 | IL32       | interleukin 32                                   | Multiple_Complex |
| TC0100007943.hg.1 | 11.3  | 9.28  | 4.04   | 1.62E-15 | 2.05E-13 | RLF        | rearranged L-myc fusion                          | Multiple_Complex |
| TC1000007598.hg.1 | 8.22  | 10.84 | -6.18  | 1.68E-15 | 2.13E-13 | AGAP6      | ArfGAP with GTPase domain, ankyrin repeat a      | Multiple_Complex |
| TC0200008268.hg.1 | 10.71 | 16.25 | -46.55 | 1.76E-15 | 2.21E-13 | GNYL       | granulysin                                       | Multiple_Complex |
| TC0100018257.hg.1 | 12.92 | 10.53 | 5.24   | 1.92E-15 | 2.39E-13 | GNAI3      | guanine nucleotide binding protein (G protein    | Multiple_Complex |
| TC0800007127.hg.1 | 6.46  | 9.88  | -10.67 | 1.93E-15 | 2.40E-13 | ELP3       | elongator acetyltransferase complex subunit 3    | Multiple_Complex |
| TC0500012210.hg.1 | 9.46  | 11.5  | -4.12  | 2.01E-15 | 2.48E-13 | TMEM173    | transmembrane protein 173                        | Multiple_Complex |
| TC0200012072.hg.1 | 9.56  | 12.07 | -5.72  | 2.16E-15 | 2.64E-13 | MPV17      | Mpv17 mitochondrial inner membrane protei        | Multiple_Complex |
| TC2200007088.hg.1 | 14.08 | 10.33 | 13.43  | 2.18E-15 | 2.65E-13 | LIMK2      | LIM domain kinase 2                              | Multiple_Complex |
| TC1400010763.hg.1 | 4.23  | 6.37  | -4.41  | 2.30E-15 | 2.79E-13 | TMEM229E   | transmembrane protein 229B                       | Coding           |
| TC1700010548.hg.1 | 8.75  | 6.28  | 5.55   | 2.34E-15 | 2.82E-13 | CWC25      | CWC25 spliceosome-associated protein homo        | Multiple_Complex |
| TC2000008985.hg.1 | 11.87 | 8.03  | 14.3   | 2.45E-15 | 2.93E-13 | RBM39      | RNA binding motif protein 39                     | Multiple_Complex |
| TC0200016727.hg.1 | 6.3   | 8.23  | -3.83  | 2.73E-15 | 3.25E-13 | IWS1       | IWS1 homolog (S. cerevisiae)                     | Multiple_Complex |
| TC0200015314.hg.1 | 17.91 | 15.69 | 4.65   | 2.74E-15 | 3.25E-13 | STK17B     | serine/threonine kinase 17b                      | Multiple_Complex |
| TC1900006977.hg.1 | 11.59 | 8.59  | 8.02   | 2.81E-15 | 3.31E-13 | ICAM1      | intercellular adhesion molecule 1                | Multiple_Complex |
| TC0700011944.hg.1 | 9.81  | 6.59  | 9.31   | 2.95E-15 | 3.46E-13 | ZNF394     | zinc finger protein 394                          | Multiple_Complex |
| TC1600009855.hg.1 | 10.55 | 13.21 | -6.36  | 3.35E-15 | 3.90E-13 | NPIP6      | nuclear pore complex interacting protein fami    | Coding           |
| TC0600013125.hg.1 | 7.78  | 11.43 | -12.56 | 3.37E-15 | 3.91E-13 | THEMIS     | thymocyte selection associated                   | Coding           |
| TC0100007283.hg.1 | 5.86  | 7.86  | -3.99  | 3.50E-15 | 4.03E-13 | ZBTB40     | zinc finger and BTB domain containing 40         | Multiple_Complex |
| TC0100009949.hg.1 | 10.85 | 7.66  | 9.13   | 3.54E-15 | 4.05E-13 | PSMD4      | proteasome 26S subunit, non-ATPase 4             | Multiple_Complex |
| TC1600007037.hg.1 | 9.79  | 12.64 | -7.21  | 3.57E-15 | 4.07E-13 | NPIPA7     | nuclear pore complex interacting protein fami    | Coding           |
| TC0100015246.hg.1 | 8.49  | 11.54 | -8.28  | 3.86E-15 | 4.38E-13 | KCNA3      | potassium channel, voltage gated shaker relat    | Multiple_Complex |
| TC1700011060.hg.1 | 6.31  | 9.72  | -10.66 | 3.92E-15 | 4.42E-13 | FAM117A    | family with sequence similarity 117, member      | Multiple_Complex |
| TC0X00007573.hg.1 | 10.91 | 13.03 | -4.34  | 4.04E-15 | 4.54E-13 | OGT        | O-linked N-acetylglucosamine (GlcNAc) transfi    | Multiple_Complex |
| TC1900011847.hg.1 | 10.85 | 7.64  | 9.3    | 4.87E-15 | 5.44E-13 | LRG1       | leucine-rich alpha-2-glycoprotein 1              | Multiple_Complex |
| TC1000009536.hg.1 | 12.3  | 8.75  | 11.72  | 4.95E-15 | 5.50E-13 | ID1        | isopentenyl-diphosphate delta isomerase 1        | Multiple_Complex |
| TC0200014672.hg.1 | 9.2   | 3.97  | 37.52  | 5.04E-15 | 5.58E-13 | NR4A2      | nuclear receptor subfamily 4, group A, memb      | Multiple_Complex |
| TC0900006961.hg.1 | 12.19 | 7.72  | 22.2   | 5.76E-15 | 6.33E-13 | DNAJA1     | DnaJ (Hsp40) homolog, subfamily A, member        | Multiple_Complex |
| TC1200010798.hg.1 | 7.87  | 10.29 | -5.35  | 5.79E-15 | 6.33E-13 | AAAS       | achalasia, adrenocortical insufficiency, alacrin | Multiple_Complex |
| TC1500010778.hg.1 | 8.38  | 10.79 | -5.29  | 5.95E-15 | 6.48E-13 | IL16       | interleukin 16                                   | Multiple_Complex |
| TC0600013464.hg.1 | 4.9   | 7.33  | -5.38  | 6.06E-15 | 6.57E-13 | SHPRH      | SNF2 histone linker PHD RING helicase, E3 ubi    | Multiple_Complex |
| TC0700013043.hg.1 | 6.32  | 9.14  | -7.08  | 6.29E-15 | 6.78E-13 | GIMAP6     | GTPase, IMAP family member 6                     | Multiple_Complex |
| TC0500009690.hg.1 | 10.23 | 8.21  | 4.06   | 6.44E-15 | 6.91E-13 | RUFY1      | RUN and FYVE domain containing 1                 | Multiple_Complex |
| TC1200006771.hg.1 | 9.96  | 12.93 | -7.83  | 6.53E-15 | 6.93E-13 | CLEC2D     | C-type lectin domain family 2, member D          | Multiple_Complex |
| TC1000009714.hg.1 | 6.75  | 9.57  | -7.07  | 6.54E-15 | 6.93E-13 | PRKCQ      | protein kinase C, theta                          | Multiple_Complex |
| TC0X00007721.hg.1 | 5.68  | 9.17  | -11.23 | 6.56E-15 | 6.93E-13 | GPR174     | G protein-coupled receptor 174                   | Coding           |
| TC2200008427.hg.1 | 7.86  | 5.59  | 4.82   | 6.61E-15 | 6.95E-13 | OSM        | oncostatin M                                     | Coding           |

|                      |       |       |        |          |          |          |                                                   |                  |
|----------------------|-------|-------|--------|----------|----------|----------|---------------------------------------------------|------------------|
| TC1900009824.hg.1    | 12.32 | 9.69  | 6.2    | 7.17E-15 | 7.51E-13 | DNAJB1   | DnaJ (Hsp40) homolog, subfamily B, member         | Multiple_Complex |
| TC1200008373.hg.1    | 5.94  | 8.32  | -5.19  | 7.50E-15 | 7.81E-13 | TMTC3    | transmembrane and tetratricopeptide repeat        | Multiple_Complex |
| TC1600011365.hg.1    | 9.31  | 11.75 | -5.42  | 7.73E-15 | 8.01E-13 | NPIPB9   | nuclear pore complex interacting protein fami     | Coding           |
| TC1700008709.hg.1    | 10.69 | 13.29 | -6.07  | 7.79E-15 | 8.04E-13 | BPTF     | bromodomain PHD finger transcription factor       | Multiple_Complex |
| TC0100016138.hg.1    | 5.96  | 8.34  | -5.19  | 7.96E-15 | 8.17E-13 | SLAMF1   | signaling lymphocytic activation molecule fam     | Multiple_Complex |
| TC1700008917.hg.1    | 11.58 | 10.21 | 2.58   | 8.43E-15 | 8.61E-13 | SAP30BP  | SAP30 binding protein                             | Multiple_Complex |
| TC0300013960.hg.1    | 10.52 | 8.17  | 5.06   | 8.49E-15 | 8.63E-13 | HIGD1A   | HIG1 hypoxia inducible domain family, membe       | Multiple_Complex |
| TC1000010509.hg.1    | 8.78  | 11.14 | -5.13  | 8.81E-15 | 8.91E-13 | AGAP4    | ArfGAP with GTPase domain, ankyrin repeat a       | Multiple_Complex |
| TC1200006738.hg.1    | 6.98  | 11.31 | -20.05 | 8.87E-15 | 8.93E-13 | KLRG1    | killer cell lectin-like receptor subfamily G, mer | Multiple_Complex |
| TC0100009339.hg.1    | 11.52 | 9.28  | 4.73   | 9.37E-15 | 9.39E-13 | TMEM167E | transmembrane protein 167B                        | Multiple_Complex |
| TC0400007933.hg.1    | 10.95 | 5.77  | 36.28  | 9.75E-15 | 9.72E-13 | ANXA3    | annexin A3                                        | Multiple_Complex |
| TC0500012470.hg.1    | 13.42 | 17.11 | -12.83 | 9.91E-15 | 9.84E-13 | CD74     | CD74 molecule, major histocompatibility com       | Multiple_Complex |
| TC1500007829.hg.1    | 5.68  | 3.25  | 5.39   | 1.02E-14 | 1.01E-12 | LOXL1    | lysyl oxidase-like 1                              | Multiple_Complex |
| TC0100014964.hg.1    | 8.76  | 6.14  | 6.13   | 1.04E-14 | 1.02E-12 | DNTP2    | deoxynucleotidyltransferase, terminal, interac    | Multiple_Complex |
| TSUnmapped00000341.h | 4.77  | 7.08  | -4.95  | 1.05E-14 | 1.03E-12 | ZNF780A  | zinc finger protein 780A                          | Coding           |
| TC1200009876.hg.1    | 10.5  | 7.26  | 9.46   | 1.07E-14 | 1.04E-12 | CD69     | CD69 molecule                                     | Multiple_Complex |
| TC1400008683.hg.1    | 12.71 | 10.15 | 5.89   | 1.09E-14 | 1.06E-12 | RBM23    | RNA binding motif protein 23                      | Multiple_Complex |
| TC0100008326.hg.1    | 6.78  | 9.53  | -6.72  | 1.10E-14 | 1.07E-12 | FAM159A  | family with sequence similarity 159, member       | Multiple_Complex |
| TC0600013794.hg.1    | 4.49  | 6.55  | -4.18  | 1.14E-14 | 1.09E-12 | AGPAT4   | 1-acylglycerol-3-phosphate O-acyltransferase      | Multiple_Complex |
| TC1500010047.hg.1    | 9.26  | 11.53 | -4.84  | 1.16E-14 | 1.11E-12 | SCAMP2   | secretory carrier membrane protein 2              | Multiple_Complex |
| TC1100012225.hg.1    | 6.53  | 9.01  | -5.58  | 1.28E-14 | 1.22E-12 | NPAT     | nuclear protein, ataxia-telangiectasia locus      | Multiple_Complex |
| TC1700009137.hg.1    | 4.11  | 6.41  | -4.93  | 1.46E-14 | 1.38E-12 | RPTOR    | regulatory associated protein of MTOR, compl      | Multiple_Complex |
| TC0200012809.hg.1    | 15.56 | 12.43 | 8.73   | 1.60E-14 | 1.51E-12 | PELI1    | pellino E3 ubiquitin protein ligase 1             | Multiple_Complex |
| TC0600011385.hg.1    | 7.58  | 4.99  | 5.99   | 1.62E-14 | 1.53E-12 | FLOT1    | Transcript Identified by AceView, Entrez Gene     | Unassigned       |
| TC1700010587.hg.1    | 7.27  | 9.98  | -6.51  | 1.64E-14 | 1.53E-12 | IKZF3    | IKAROS family zinc finger 3                       | Multiple_Complex |
| TC1600009731.hg.1    | 5.95  | 8.43  | -5.58  | 1.68E-14 | 1.56E-12 | COG7     | component of oligomeric golgi complex 7           | Multiple_Complex |
| TC1100010946.hg.1    | 8.54  | 10.73 | -4.57  | 1.73E-14 | 1.60E-12 | LPXN     | leupaxin                                          | Multiple_Complex |
| TC2100007803.hg.1    | 10.72 | 8.96  | 3.39   | 1.74E-14 | 1.61E-12 | APP      | amyloid beta (A4) precursor protein               | Multiple_Complex |
| TC0200007999.hg.1    | 5.92  | 8.42  | -5.68  | 1.82E-14 | 1.68E-12 | ZNF638   | Transcript Identified by AceView, Entrez Gene     | Coding           |
| TC0500008384.hg.1    | 12.34 | 9.66  | 6.41   | 1.87E-14 | 1.70E-12 | AP3S1    | adaptor-related protein complex 3, sigma 1 su     | Multiple_Complex |
| TC0800008943.hg.1    | 6.39  | 9.21  | -7.05  | 1.87E-14 | 1.70E-12 | PHF20L1  | Transcript Identified by AceView, Entrez Gene     | Unassigned       |
| TC0X00006799.hg.1    | 15.91 | 10.26 | 50.23  | 1.91E-14 | 1.74E-12 | SAT1     | spermidine/spermine N1-acetyltransferase 1        | Multiple_Complex |
| TC0300007739.hg.1    | 8.56  | 6.72  | 3.58   | 2.07E-14 | 1.87E-12 | PSMC1    | Homo sapiens proteasome (prosome, macrop          | Multiple_Complex |
| TC1700009539.hg.1    | 15.25 | 18.14 | -7.39  | 2.10E-14 | 1.89E-12 | PFN1     | profilin 1                                        | Multiple_Complex |
| TC0800012410.hg.1    | 13.43 | 15.06 | -3.09  | 2.13E-14 | 1.91E-12 | WHSC1L1  | Wolf-Hirschhorn syndrome candidate 1-like 1       | Multiple_Complex |
| TC2200008703.hg.1    | 14.2  | 16.5  | -4.91  | 2.16E-14 | 1.93E-12 | DDX17    | DEAD (Asp-Glu-Ala-Asp) box helicase 17            | Multiple_Complex |
| TC0100017028.hg.1    | 13.9  | 11.59 | 4.96   | 2.21E-14 | 1.96E-12 | PPP1R15B | protein phosphatase 1, regulatory subunit 15f     | Coding           |
| TC1000011904.hg.1    | 10.53 | 13.92 | -10.53 | 2.24E-14 | 1.99E-12 | ABLIM1   | actin binding LIM protein 1                       | Multiple_Complex |
| TC1200012666.hg.1    | 5     | 7.4   | -5.3   | 2.31E-14 | 2.04E-12 | TMEM19   | transmembrane protein 19                          | Multiple_Complex |
| TC1200011838.hg.1    | 5.68  | 8.56  | -7.34  | 2.41E-14 | 2.12E-12 | CMKLR1   | chemerin chemokine-like receptor 1                | Multiple_Complex |
| TC0200007067.hg.1    | 10.79 | 9.13  | 3.16   | 2.43E-14 | 2.13E-12 | NRBP1    | nuclear receptor binding protein 1                | Multiple_Complex |
| TC0300008559.hg.1    | 8.06  | 11.45 | -10.48 | 2.46E-14 | 2.15E-12 | PARP15   | poly(ADP-ribose) polymerase family member         | Multiple_Complex |
| TC1000008800.hg.1    | 8.28  | 6.24  | 4.13   | 2.51E-14 | 2.18E-12 | GSTO1    | glutathione S-transferase omega 1                 | Multiple_Complex |
| TC0500013259.hg.1    | 9.21  | 11.42 | -4.61  | 2.53E-14 | 2.19E-12 | MFAP3    | microfibrillar associated protein 3               | Multiple_Complex |
| TC1600010772.hg.1    | 5.93  | 7.69  | -3.4   | 2.86E-14 | 2.46E-12 | VAC14    | Vac14 homolog (S. cerevisiae)                     | Multiple_Complex |
| TC1300008517.hg.1    | 13.38 | 9.37  | 16.17  | 2.87E-14 | 2.46E-12 | HMGB1    | high mobility group box 1                         | Multiple_Complex |
| TC1600006888.hg.1    | 7.33  | 10.34 | -8.08  | 2.98E-14 | 2.55E-12 | CIITA    | class II, major histocompatibility complex, trar  | Multiple_Complex |
| TC0100008625.hg.1    | 12.32 | 8.85  | 11.04  | 3.12E-14 | 2.65E-12 | PDE4B    | phosphodiesterase 4B, cAMP-specific               | Multiple_Complex |
| TC0300009789.hg.1    | 8.42  | 10.81 | -5.27  | 3.17E-14 | 2.69E-12 | ST6GAL1  | ST6 beta-galactosamide alpha-2,6-sialyltranfe     | Multiple_Complex |
| TC1200007461.hg.1    | 8.52  | 11.81 | -9.82  | 3.24E-14 | 2.73E-12 | PCED1B   | PC-esterase domain containing 1B                  | Multiple_Complex |
| TC0200010438.hg.1    | 8.79  | 6.66  | 4.36   | 3.25E-14 | 2.73E-12 | NDUFB3   | NADH dehydrogenase (ubiquinone) 1 beta sul        | Coding           |
| TC0Y00006642.hg.1    | 14.89 | 12    | 7.39   | 3.33E-14 | 2.78E-12 | TMSB4Y   | thymosin beta 4, Y-linked                         | Coding           |
| TC0700009604.hg.1    | 5.91  | 8.43  | -5.74  | 3.34E-14 | 2.78E-12 | ZNF398   | zinc finger protein 398                           | Multiple_Complex |
| TC2000009216.hg.1    | 10.96 | 6.6   | 20.51  | 3.53E-14 | 2.93E-12 | SLPI     | secretory leukocyte peptidase inhibitor           | Multiple_Complex |
| TC1000007876.hg.1    | 11.01 | 8.52  | 5.62   | 3.81E-14 | 3.16E-12 | DDX21    | DEAD (Asp-Glu-Ala-Asp) box helicase 21            | Multiple_Complex |
| TC0600014264.hg.1    | 8.13  | 6.18  | 3.86   | 3.83E-14 | 3.16E-12 | DDAH2    | dimethylarginine dimethylaminohydrolase 2         | Multiple_Complex |
| TC0700010925.hg.1    | 4.99  | 7.26  | -4.81  | 3.93E-14 | 3.23E-12 | DDX56    | DEAD (Asp-Glu-Ala-Asp) box helicase 56            | Multiple_Complex |
| TC1600010680.hg.1    | 6.68  | 8.35  | -3.17  | 4.14E-14 | 3.39E-12 | SLC7A6OS | solute carrier family 7, member 6 opposite str    | Multiple_Complex |
| TC1200012417.hg.1    | 15.38 | 13.01 | 5.19   | 4.21E-14 | 3.43E-12 | SLC15A4  | solute carrier family 15 (oligopeptide transpor   | Multiple_Complex |
| TC1200009742.hg.1    | 9.05  | 6.95  | 4.28   | 4.58E-14 | 3.72E-12 | CHD4     | chromodomain helicase DNA binding protein         | Multiple_Complex |
| TC0700007505.hg.1    | 10.25 | 12.66 | -5.32  | 4.59E-14 | 3.72E-12 | IKZF1    | IKAROS family zinc finger 1                       | Multiple_Complex |
| TC0100009555.hg.1    | 8.97  | 13.08 | -17.38 | 4.84E-14 | 3.90E-12 | CD2      | CD2 molecule                                      | Coding           |
| TC0100010310.hg.1    | 7.95  | 10.64 | -6.48  | 4.93E-14 | 3.96E-12 | SLAMF7   | SLAM family member 7                              | Multiple_Complex |
| TC0200016454.hg.1    | 8.26  | 5.58  | 6.4    | 4.95E-14 | 3.96E-12 | KIAA1841 | KIAA1841                                          | Multiple_Complex |
| TC1900006955.hg.1    | 10.38 | 7.62  | 6.74   | 4.99E-14 | 3.98E-12 | UBL5     | ubiquitin-like 5                                  | Multiple_Complex |
| TC0900010366.hg.1    | 9.26  | 6.96  | 4.94   | 5.04E-14 | 4.01E-12 | KLF9     | Kruppel-like factor 9                             | Multiple_Complex |
| TC0500009210.hg.1    | 6.97  | 9.95  | -7.9   | 5.09E-14 | 4.03E-12 | ITK      | IL2-inducible T-cell kinase                       | Multiple_Complex |
| TC0700009675.hg.1    | 6.22  | 8.79  | -5.93  | 5.11E-14 | 4.03E-12 | GIMAP8   | GTPase, IMAP family member 8                      | Multiple_Complex |
| TC0200010157.hg.1    | 6.93  | 9.36  | -5.38  | 5.25E-14 | 4.13E-12 | ITGA4    | integrin alpha 4                                  | Multiple_Complex |
| TC1900011312.hg.1    | 9.53  | 11.69 | -4.45  | 5.32E-14 | 4.15E-12 | ZNF611   | zinc finger protein 611                           | Multiple_Complex |



|                      |       |       |        |          |          |            |                                                 |                  |
|----------------------|-------|-------|--------|----------|----------|------------|-------------------------------------------------|------------------|
| TC1600008005.hg.1    | 5.4   | 10.26 | -29    | 5.33E-14 | 4.15E-12 | ADGRG1     | adhesion G protein-coupled receptor G1          | Multiple_Complex |
| TC0600007544.hg.1    | 10.7  | 12.72 | -4.04  | 5.34E-14 | 4.15E-12 | TUBB       | tubulin, beta class I                           | Multiple_Complex |
| TC0100011269.hg.1    | 5.43  | 7.82  | -5.24  | 5.45E-14 | 4.22E-12 | LINC00260  | long intergenic non-protein coding RNA 260      | Multiple_Complex |
| TC0100018246.hg.1    | 8.34  | 10.96 | -6.13  | 5.47E-14 | 4.22E-12 | LRRC8C     | leucine rich repeat containing 8 family, memb   | Multiple_Complex |
| TC0100009696.hg.1    | 5.73  | 7.37  | -3.11  | 5.51E-14 | 4.24E-12 | LOC388692  | Homo sapiens uncharacterized LOC388692 (L       | NonCoding        |
| TC0900012159.hg.1    | 7.81  | 5.93  | 3.68   | 5.58E-14 | 4.26E-12 | DNAJC25    | DnaJ (Hsp40) homolog, subfamily C , member      | Multiple_Complex |
| TC0600011071.hg.1    | 13.15 | 14.68 | -2.89  | 5.58E-14 | 4.26E-12 | C6orf62    | chromosome 6 open reading frame 62              | Multiple_Complex |
| TC0X00008240.hg.1    | 11.9  | 8.61  | 9.81   | 5.64E-14 | 4.29E-12 | PGRMC1     | progesterone receptor membrane component        | Multiple_Complex |
| TC0200008675.hg.1    | 13.82 | 10.1  | 13.14  | 5.71E-14 | 4.33E-12 | IL18RAP    | interleukin 18 receptor accessory protein       | Multiple_Complex |
| TC0X00011309.hg.1    | 12.39 | 9.12  | 9.65   | 6.05E-14 | 4.57E-12 | HNRNPH2    | heterogeneous nuclear ribonucleoprotein H2      | Coding           |
| TC1000011749.hg.1    | 10.46 | 7.98  | 5.59   | 6.43E-14 | 4.84E-12 | ITPRIP     | inositol 1,4,5-trisphosphate receptor interacti | Multiple_Complex |
| TC1400010716.hg.1    | 5.49  | 7.93  | -5.42  | 6.51E-14 | 4.88E-12 | HOMEZ      | homeobox and leucine zipper encoding            | Multiple_Complex |
| TSUnmapped00000100.h | 5.3   | 7.49  | -4.54  | 6.64E-14 | 4.96E-12 | ZNF780B    | zinc finger protein 780B                        | Coding           |
| TC2000009916.hg.1    | 13.66 | 11.48 | 4.53   | 6.77E-14 | 5.04E-12 | TGIF2-C20c | TGIF2-C20orf24 readthrough                      | Multiple_Complex |
| TC2000009915.hg.1    | 13.49 | 11.48 | 4.02   | 6.88E-14 | 5.11E-12 | C20orf24   | chromosome 20 open reading frame 24             | Multiple_Complex |
| TC0800009752.hg.1    | 14.72 | 12.29 | 5.42   | 7.12E-14 | 5.26E-12 | ASAH1      | N-acylsphingosine amidohydrolase (acid cerar    | Multiple_Complex |
| TC0100018484.hg.1    | 17.6  | 15.16 | 5.44   | 7.38E-14 | 5.44E-12 | MCL1       | myeloid cell leukemia 1                         | Multiple_Complex |
| TC0300006580.hg.1    | 6.95  | 4.98  | 3.91   | 7.48E-14 | 5.50E-12 | IRAK2      | interleukin 1 receptor associated kinase 2      | Multiple_Complex |
| TC0200012961.hg.1    | 10.21 | 12.52 | -4.97  | 7.84E-14 | 5.74E-12 | AAK1       | AP2 associated kinase 1                         | Multiple_Complex |
| TC0400011524.hg.1    | 7.47  | 9.04  | -2.96  | 7.93E-14 | 5.79E-12 | TBCK       | TBC1 domain containing kinase                   | Multiple_Complex |
| TC1100006485.hg.1    | 7.37  | 8.91  | -2.91  | 8.07E-14 | 5.86E-12 | TMEM80     | transmembrane protein 80                        | Multiple_Complex |
| TC0200016424.hg.1    | 7.29  | 10.3  | -8.08  | 8.08E-14 | 5.86E-12 | LBH        | limb bud and heart development                  | Multiple_Complex |
| TC0100009241.hg.1    | 10.54 | 14.57 | -16.39 | 8.15E-14 | 5.89E-12 | S1PR1      | sphingosine-1-phosphate receptor 1              | Multiple_Complex |
| TC0700012115.hg.1    | 4.81  | 7.19  | -5.21  | 8.18E-14 | 5.89E-12 | NAPEPLD    | N-acyl phosphatidylethanolamine phospholip      | Multiple_Complex |
| TC0500007143.hg.1    | 5.73  | 7.48  | -3.36  | 8.22E-14 | 5.90E-12 | SKP2       | S-phase kinase-associated protein 2, E3 ubiqu   | Multiple_Complex |
| TC0900012162.hg.1    | 6.15  | 3.83  | 4.98   | 8.31E-14 | 5.94E-12 | ORM1       | orosomucoid 1                                   | Multiple_Complex |
| TC0600011381.hg.1    | 12.12 | 9.63  | 5.64   | 8.54E-14 | 6.09E-12 | FLOT1      | flotillin 1                                     | Multiple_Complex |
| TC1200007709.hg.1    | 12.19 | 9.21  | 7.9    | 8.66E-14 | 6.15E-12 | PFDN5      | prefoldin subunit 5                             | Multiple_Complex |
| TC0700011383.hg.1    | 9.79  | 5.4   | 20.94  | 8.73E-14 | 6.18E-12 | SBDS       | Shwachman-Bodian-Diamond syndrome               | Multiple_Complex |
| TC1100013003.hg.1    | 7.54  | 10.03 | -5.63  | 8.76E-14 | 6.18E-12 | TMX2; C11  | thioredoxin-related transmembrane protein 2     | Multiple_Complex |
| TC0800009961.hg.1    | 10.77 | 6.31  | 22.14  | 8.85E-14 | 6.21E-12 | CLU; MIR6  | clusterin; microRNA 6843                        | Multiple_Complex |
| TC1100007217.hg.1    | 7.69  | 9.71  | -4.06  | 8.87E-14 | 6.21E-12 | QSER1      | glutamine and serine rich 1                     | Multiple_Complex |
| TC0100013744.hg.1    | 8.09  | 9.71  | -3.07  | 8.88E-14 | 6.21E-12 | MEAF6      | MYST/Esa1-associated factor 6                   | Multiple_Complex |
| TC1200012646.hg.1    | 7.07  | 9.75  | -6.39  | 9.47E-14 | 6.59E-12 | ESYT1      | extended synaptotagmin-like protein 1           | Multiple_Complex |
| TC0200012433.hg.1    | 6.38  | 8.7   | -5.01  | 9.70E-14 | 6.73E-12 | PREPL      | prolyl endopeptidase-like                       | Multiple_Complex |
| TC0100016360.hg.1    | 5.97  | 9.21  | -9.42  | 9.76E-14 | 6.75E-12 | SELL       | Memczak2013 ALT_ACCEPTOR, ALT_DONOR,            | NonCoding        |
| TC1600006842.hg.1    | 12.43 | 10.73 | 3.25   | 9.93E-14 | 6.85E-12 | C16orf72   | chromosome 16 open reading frame 72             | Multiple_Complex |
| TC0600014277.hg.1    | 9.34  | 12.9  | -11.79 | 1.05E-13 | 7.20E-12 | HLA-DMA    | major histocompatibility complex, class II, DM  | Multiple_Complex |
| TC0300013949.hg.1    | 9.71  | 11.77 | -4.19  | 1.11E-13 | 7.62E-12 | SATB1      | SATB homeobox 1                                 | Multiple_Complex |
| TSUnmapped00000019.h | 5.17  | 7.19  | -4.07  | 1.12E-13 | 7.64E-12 | DYRK1B     | dual specificity tyrosine-(Y)-phosphorylation r | Coding           |
| TC1500009641.hg.1    | 8.52  | 11.91 | -10.44 | 1.14E-13 | 7.75E-12 | RORA       | RAR-related orphan receptor A                   | Multiple_Complex |
| TC1900007839.hg.1    | 13.62 | 15.84 | -4.65  | 1.14E-13 | 7.75E-12 | FXYD5      | FXYD domain containing ion transport regulat    | Multiple_Complex |
| TC1200009590.hg.1    | 6.15  | 8.5   | -5.11  | 1.17E-13 | 7.89E-12 | DCP1B      | decapping mRNA 1B                               | Multiple_Complex |
| TC0500007668.hg.1    | 9.57  | 6.98  | 6.03   | 1.19E-13 | 8.04E-12 | CDK7       | cyclin-dependent kinase 7                       | Multiple_Complex |
| TC0X00008002.hg.1    | 10.21 | 7.26  | 7.72   | 1.20E-13 | 8.09E-12 | NGFRAP1    | nerve growth factor receptor (TNFRSF16) assc    | Multiple_Complex |
| TC0600013300.hg.1    | 12.76 | 10.63 | 4.39   | 1.22E-13 | 8.18E-12 | IFNGR1     | interferon gamma receptor 1                     | Multiple_Complex |
| TC1700009556.hg.1    | 9.63  | 11.93 | -4.9   | 1.27E-13 | 8.50E-12 | SCIMP      | SLP adaptor and CSK interacting membrane pr     | Multiple_Complex |
| TC2000009944.hg.1    | 11.49 | 9.8   | 3.24   | 1.33E-13 | 8.84E-12 | RTFDC1     | replication termination factor 2 domain conta   | Multiple_Complex |
| TC1500010020.hg.1    | 7.57  | 10.57 | -7.97  | 1.35E-13 | 9.00E-12 | UBL7       | ubiquitin-like 7                                | Multiple_Complex |
| TC0600009744.hg.1    | 8.01  | 5.97  | 4.1    | 1.37E-13 | 9.04E-12 | RAB32      | RAB32, member RAS oncogene family               | Multiple_Complex |
| TC1700011363.hg.1    | 8.32  | 6.13  | 4.56   | 1.39E-13 | 9.14E-12 | NACA2      | nascent polypeptide-associated complex alph     | Coding           |
| TC1400009104.hg.1    | 11.67 | 7.32  | 20.42  | 1.40E-13 | 9.22E-12 | RPL36AL    | ribosomal protein L36a-like                     | Coding           |
| TC1700007585.hg.1    | 8.62  | 12.46 | -14.37 | 1.41E-13 | 9.26E-12 | SLFN5      | schlafen family member 5                        | Multiple_Complex |
| TC0200009091.hg.1    | 12.66 | 9.97  | 6.44   | 1.53E-13 | 1.00E-11 | RALB       | v-ral simian leukemia viral oncogene homolog    | Multiple_Complex |
| TC0100016887.hg.1    | 10.65 | 8.16  | 5.6    | 1.54E-13 | 1.00E-11 | ZNF281     | zinc finger protein 281                         | Multiple_Complex |
| TC1200010006.hg.1    | 16.57 | 13.15 | 10.68  | 1.58E-13 | 1.02E-11 | PLBD1      | phospholipase B domain containing 1             | Multiple_Complex |
| TC0300009458.hg.1    | 10.44 | 8.29  | 4.44   | 1.60E-13 | 1.04E-11 | SEC62      | SEC62 homolog, preprotein translocation fact    | Multiple_Complex |
| TC1500010923.hg.1    | 3.76  | 6.16  | -5.29  | 1.64E-13 | 1.06E-11 | DET1       | de-etiolated homolog 1 (Arabidopsis)            | Multiple_Complex |
| TC0900010886.hg.1    | 6.61  | 9.08  | -5.57  | 1.66E-13 | 1.07E-11 | PTCH1      | patched 1                                       | Multiple_Complex |
| TC1200009239.hg.1    | 9.08  | 7.26  | 3.53   | 1.77E-13 | 1.14E-11 | KMT5A      | lysine (K)-specific methyltransferase 5A        | Multiple_Complex |
| TC0100011012.hg.1    | 7.88  | 4.32  | 11.75  | 1.80E-13 | 1.15E-11 | RGS1       | regulator of G-protein signaling 1              | Multiple_Complex |
| TC0300011757.hg.1    | 7.54  | 3.87  | 12.72  | 1.82E-13 | 1.16E-11 | PROS1      | protein S (alpha)                               | Multiple_Complex |
| TC2000009971.hg.1    | 5.07  | 8.42  | -10.2  | 1.88E-13 | 1.20E-11 | SIRPG      | signal-regulatory protein gamma                 | Multiple_Complex |
| TC0700010504.hg.1    | 4.63  | 6.72  | -4.27  | 1.99E-13 | 1.26E-11 | OSBPL3     | oxysterol binding protein-like 3                | Multiple_Complex |
| TC1500007513.hg.1    | 10.25 | 7.72  | 5.06   | 2.00E-13 | 1.26E-11 | LACTB      | lactamase, beta                                 | Multiple_Complex |
| TC0500013316.hg.1    | 8.34  | 12.44 | -17.12 | 2.10E-13 | 1.33E-11 | CD180      | CD180 molecule                                  | Multiple_Complex |
| TC2000009023.hg.1    | 13.56 | 15.65 | -4.27  | 2.22E-13 | 1.40E-11 | SAMHD1     | SAM domain and HD domain 1                      | Multiple_Complex |
| TC2000009504.hg.1    | 10.47 | 13.33 | -7.29  | 2.24E-13 | 1.40E-11 | ZNF217     | zinc finger protein 217                         | Multiple_Complex |
| TC1600008407.hg.1    | 9.31  | 11.57 | -4.8   | 2.31E-13 | 1.45E-11 | NPIPBI5    | nuclear pore complex interacting protein fami   | Multiple_Complex |
| TC1000007510.hg.1    | 7.86  | 9.99  | -4.38  | 2.36E-13 | 1.47E-11 | AGAP9; CTI | Salzman2013 ANNOTATED, CDS, coding, INTEI       | Multiple_Complex |

|                   |       |       |        |          |          |          |                                                   |                  |
|-------------------|-------|-------|--------|----------|----------|----------|---------------------------------------------------|------------------|
| TC1900011677.hg.1 | 7.03  | 8.77  | -3.34  | 2.37E-13 | 1.47E-11 | IL27RA   | interleukin 27 receptor, alpha                    | Multiple_Complex |
| TC1000008727.hg.1 | 10.42 | 8.15  | 4.82   | 2.40E-13 | 1.49E-11 | NFKB2    | nuclear factor of kappa light polypeptide gene    | Multiple_Complex |
| TC0400012782.hg.1 | 9.18  | 11.13 | -3.88  | 2.45E-13 | 1.51E-11 | STIM2    | stromal interaction molecule 2                    | Multiple_Complex |
| TC0300006694.hg.1 | 9.83  | 11.93 | -4.29  | 2.47E-13 | 1.52E-11 | NR2C2    | nuclear receptor subfamily 2, group C, memb       | Multiple_Complex |
| TC0100015864.hg.1 | 11.4  | 9.26  | 4.4    | 2.51E-13 | 1.54E-11 | S100A6   | S100 calcium binding protein A6                   | Multiple_Complex |
| TC1000007883.hg.1 | 19.19 | 15.88 | 9.93   | 2.53E-13 | 1.55E-11 | SRGN     | serglycin                                         | Multiple_Complex |
| TC1900009272.hg.1 | 11.34 | 13.86 | -5.74  | 2.59E-13 | 1.58E-11 | AES      | amino-terminal enhancer of split                  | Multiple_Complex |
| TC1200006721.hg.1 | 10.86 | 6.96  | 14.99  | 2.59E-13 | 1.58E-11 | CLEC4D   | C-type lectin domain family 4, member D           | Coding           |
| TC0800012447.hg.1 | 14.42 | 12.12 | 4.93   | 2.64E-13 | 1.61E-11 | AZIN1    | antizyme inhibitor 1                              | Multiple_Complex |
| TC2200008477.hg.1 | 4.77  | 7.46  | -6.44  | 2.66E-13 | 1.61E-11 | PATZ1    | POZ (BTB) and AT hook containing zinc finger      | Multiple_Complex |
| TC0200014834.hg.1 | 7.97  | 10.06 | -4.26  | 2.71E-13 | 1.64E-11 | STK39    | serine threonine kinase 39                        | Multiple_Complex |
| TC0900009274.hg.1 | 11.39 | 9.8   | 3.03   | 2.76E-13 | 1.66E-11 | TUBB4B   | tubulin, beta 4B class IVb                        | Multiple_Complex |
| TC1400010617.hg.1 | 9.62  | 13.05 | -10.76 | 2.81E-13 | 1.69E-11 | PRKCH    | protein kinase C, eta                             | Multiple_Complex |
| TC2000007320.hg.1 | 8.88  | 10.6  | -3.3   | 2.90E-13 | 1.74E-11 | RALGAPB  | Ral GTPase activating protein, beta subunit (n    | Multiple_Complex |
| TC0100017528.hg.1 | 5.99  | 8.04  | -4.12  | 2.99E-13 | 1.79E-11 | PARP1    | poly(ADP-ribose) polymerase 1                     | Multiple_Complex |
| TC0700012836.hg.1 | 6.62  | 8.4   | -3.43  | 3.07E-13 | 1.83E-11 | KIAA1147 | KIAA1147                                          | Multiple_Complex |
| TC0600014265.hg.1 | 14.36 | 12.02 | 5.07   | 3.08E-13 | 1.83E-11 | CLIC1    | chloride intracellular channel 1                  | Coding           |
| TC0900006708.hg.1 | 7.2   | 8.72  | -2.87  | 3.09E-13 | 1.83E-11 | SNAPC3   | small nuclear RNA activating complex polypep      | Multiple_Complex |
| TC2100006968.hg.1 | 12.2  | 9.19  | 8.08   | 3.16E-13 | 1.87E-11 | IFNGR2   | Memczak2013 ALT_ACCEPTOR, ALT_DONOR,              | NonCoding        |
| TC1600008799.hg.1 | 11.88 | 13.88 | -3.99  | 3.17E-13 | 1.87E-11 | BANP     | BTG3 associated nuclear protein                   | Multiple_Complex |
| TC0800010558.hg.1 | 7.31  | 10.62 | -9.94  | 3.20E-13 | 1.88E-11 | TOX      | thymocyte selection-associated high mobility      | Multiple_Complex |
| TC0500010869.hg.1 | 9.21  | 5.97  | 9.43   | 3.21E-13 | 1.88E-11 | ELOVL7   | ELOVL fatty acid elongase 7                       | Multiple_Complex |
| TC2100008000.hg.1 | 6.65  | 8.56  | -3.74  | 3.22E-13 | 1.88E-11 | GART     | phosphoribosylglycinamide formyltransferase       | Multiple_Complex |
| TC1500010736.hg.1 | 10.84 | 8.85  | 3.97   | 3.25E-13 | 1.89E-11 | BLOC1S6  | biogenesis of lysosomal organelles complex-1,     | Multiple_Complex |
| TC1100011338.hg.1 | 5.63  | 7.9   | -4.81  | 3.26E-13 | 1.89E-11 | CDK2AP2  | cyclin-dependent kinase 2 associated protein :    | Multiple_Complex |
| TC1600008627.hg.1 | 8.41  | 6.32  | 4.26   | 3.33E-13 | 1.93E-11 | HSBP1    | heat shock factor binding protein 1               | Multiple_Complex |
| TC1900010612.hg.1 | 5.27  | 7.95  | -6.39  | 3.39E-13 | 1.96E-11 | MAP4K1   | mitogen-activated protein kinase kinase kinas     | Multiple_Complex |
| TC0100018323.hg.1 | 9.94  | 7.53  | 5.29   | 3.41E-13 | 1.96E-11 | IER5     | immediate early response 5                        | Coding           |
| TC0300007257.hg.1 | 6.21  | 8.81  | -6.03  | 3.42E-13 | 1.96E-11 | CCR5     | chemokine (C-C motif) receptor 5 (gene/pseur      | Multiple_Complex |
| TC1900011940.hg.1 | 12.76 | 15.78 | -8.14  | 3.51E-13 | 2.01E-11 | ECH1     | enoyl-CoA hydratase 1, peroxisomal                | Multiple_Complex |
| TC2200007138.hg.1 | 13    | 17.67 | -25.49 | 3.54E-13 | 2.02E-11 | FBX07    | F-box protein 7                                   | Multiple_Complex |
| TC0600009712.hg.1 | 11    | 13.29 | -4.87  | 3.57E-13 | 2.04E-11 | UTRN     | utrophin                                          | Multiple_Complex |
| TC1400010760.hg.1 | 7.28  | 5.07  | 4.61   | 3.60E-13 | 2.05E-11 | ATP6V1D  | ATPase, H+ transporting, lysosomal 34kDa, V1      | Multiple_Complex |
| TC1200012843.hg.1 | 14.52 | 11.39 | 8.77   | 3.62E-13 | 2.05E-11 | ARPC3    | actin related protein 2/3 complex subunit 3       | NonCoding        |
| TC0100013205.hg.1 | 13.52 | 10.82 | 6.52   | 3.70E-13 | 2.09E-11 | ECE1     | endothelin converting enzyme 1                    | Multiple_Complex |
| TC1100010761.hg.1 | 10.1  | 12.17 | -4.2   | 3.72E-13 | 2.10E-11 | FNBP4    | formin binding protein 4                          | Multiple_Complex |
| TC0700008141.hg.1 | 12.84 | 10.12 | 6.58   | 3.77E-13 | 2.12E-11 | PTPN12   | protein tyrosine phosphatase, non-receptor ty     | Multiple_Complex |
| TC1200007070.hg.1 | 8.72  | 10.05 | -2.5   | 3.87E-13 | 2.17E-11 | ETNK1    | ethanolamine kinase 1                             | Multiple_Complex |
| TC0200010713.hg.1 | 5.19  | 7.4   | -4.63  | 3.91E-13 | 2.19E-11 | ATIC     | 5-aminoimidazole-4-carboxamide ribonucleot        | Multiple_Complex |
| TC0100010303.hg.1 | 3.93  | 6.37  | -5.43  | 3.92E-13 | 2.19E-11 | SLAMF6   | Memczak2013 ANTISENSE, coding, INTERNAL,          | NonCoding        |
| TC1300009797.hg.1 | 6.85  | 5.57  | 2.43   | 4.04E-13 | 2.25E-11 | RAB20    | RAB20, member RAS oncogene family                 | Multiple_Complex |
| TC0400009217.hg.1 | 11.82 | 8.41  | 10.63  | 4.07E-13 | 2.26E-11 | KLHL2    | kelch-like family member 2                        | Multiple_Complex |
| TC1700012274.hg.1 | 13.57 | 7.49  | 67.85  | 4.11E-13 | 2.28E-11 | ITGB3    | integrin beta 3                                   | Multiple_Complex |
| TC1900011755.hg.1 | 4.94  | 6.47  | -2.89  | 4.20E-13 | 2.32E-11 | ZNF226   | zinc finger protein 226                           | Multiple_Complex |
| TC1200009800.hg.1 | 18.28 | 14.8  | 11.14  | 4.24E-13 | 2.34E-11 | SLC2A3   | solute carrier family 2 (facilitated glucose tran | Multiple_Complex |
| TC0100011487.hg.1 | 5.42  | 7.76  | -5.06  | 4.29E-13 | 2.36E-11 | TRAF5    | TNF receptor-associated factor 5                  | Multiple_Complex |
| TC0800011815.hg.1 | 13.75 | 11.69 | 4.19   | 4.46E-13 | 2.45E-11 | FAM49B   | family with sequence similarity 49, member B      | Multiple_Complex |
| TC0400011548.hg.1 | 9.88  | 13.56 | -12.84 | 4.51E-13 | 2.47E-11 | LEF1     | lymphoid enhancer-binding factor 1                | Multiple_Complex |
| TC0100009226.hg.1 | 9.09  | 10.78 | -3.22  | 4.78E-13 | 2.61E-11 | SLC30A7  | solute carrier family 30 (zinc transporter), mei  | Multiple_Complex |
| TC1100012976.hg.1 | 10.92 | 8.63  | 4.89   | 4.87E-13 | 2.65E-11 | NUCB2    | nucleobindin 2                                    | Multiple_Complex |
| TC0600014337.hg.1 | 7.23  | 8.85  | -3.07  | 4.98E-13 | 2.70E-11 | GOPC     | golgi-associated PDZ and coiled-coil motif con    | Multiple_Complex |
| TC1000008351.hg.1 | 4.9   | 7.43  | -5.81  | 4.99E-13 | 2.70E-11 | MINPP1   | multiple inositol-polyphosphate phosphatase       | Multiple_Complex |
| TC1000012121.hg.1 | 9.88  | 8.01  | 3.65   | 5.02E-13 | 2.71E-11 | OAT      | ornithine aminotransferase                        | Multiple_Complex |
| TC0200015893.hg.1 | 9.16  | 12.12 | -7.83  | 5.12E-13 | 2.76E-11 | DOCK10   | dedicator of cytokinesis 10                       | Multiple_Complex |
| TC0200015838.hg.1 | 8.15  | 9.8   | -3.13  | 5.19E-13 | 2.79E-11 | FARSB    | phenylalanyl-tRNA synthetase beta subunit         | Multiple_Complex |
| TC1200012644.hg.1 | 10.71 | 12.41 | -3.23  | 5.28E-13 | 2.83E-11 | PA2G4    | proliferation-associated 2G4                      | Multiple_Complex |
| TC0700008857.hg.1 | 8.32  | 10.14 | -3.52  | 5.42E-13 | 2.90E-11 | MDFIC    | MyoD family inhibitor domain containing           | Multiple_Complex |
| TC0100006818.hg.1 | 10.21 | 7.66  | 5.84   | 5.49E-13 | 2.93E-11 | PGD      | phosphogluconate dehydrogenase                    | Multiple_Complex |
| TC0700013441.hg.1 | 13.72 | 10.31 | 10.65  | 5.57E-13 | 2.96E-11 | IFRD1    | interferon-related developmental regulator 1      | Multiple_Complex |
| TC1400009395.hg.1 | 6.62  | 8.27  | -3.12  | 5.61E-13 | 2.98E-11 | SGPP1    | sphingosine-1-phosphate phosphatase 1             | Coding           |
| TC1600011465.hg.1 | 6.37  | 8.66  | -4.91  | 5.74E-13 | 3.04E-11 | ERVK13-1 | endogenous retrovirus group K13, member 1         | Multiple_Complex |
| TC0400012763.hg.1 | 7.36  | 5.52  | 3.58   | 5.80E-13 | 3.06E-11 | S100P    | S100 calcium binding protein P                    | Multiple_Complex |
| TC1600006628.hg.1 | 8.25  | 10.33 | -4.25  | 5.82E-13 | 3.07E-11 | KCTD5    | potassium channel tetramerization domain co       | Multiple_Complex |
| TC1300007774.hg.1 | 8.03  | 10.15 | -4.34  | 5.86E-13 | 3.08E-11 | MBNL2    | muscleblind-like splicing regulator 2             | Multiple_Complex |
| TC0X00006631.hg.1 | 19.39 | 16.43 | 7.77   | 5.93E-13 | 3.11E-11 | TMSB4X   | thymosin-beta 4, X-linked                         | Multiple_Complex |
| TC0100016166.hg.1 | 7.18  | 4.71  | 5.55   | 6.38E-13 | 3.34E-11 | APOA2    | apolipoprotein A-II                               | Multiple_Complex |
| TC0300008550.hg.1 | 10.92 | 6.88  | 16.41  | 6.44E-13 | 3.36E-11 | CSTA     | cystatin A (stefin A)                             | Multiple_Complex |
| TC0600011777.hg.1 | 17.19 | 13.5  | 12.89  | 6.64E-13 | 3.46E-11 | TREM1    | triggering receptor expressed on myeloid cells    | Multiple_Complex |
| TC1900010017.hg.1 | 10.07 | 8.17  | 3.72   | 6.78E-13 | 3.52E-11 | ELL      | elongation factor RNA polymerase II               | Multiple_Complex |
| TC0700013615.hg.1 | 10.53 | 12.23 | -3.23  | 6.85E-13 | 3.55E-11 | ZNF800   | zinc finger protein 800                           | Multiple_Complex |

|                   |       |       |        |          |          |            |                                                  |                  |
|-------------------|-------|-------|--------|----------|----------|------------|--------------------------------------------------|------------------|
| TC1400010339.hg.1 | 12.08 | 9.84  | 4.72   | 6.89E-13 | 3.55E-11 | C14orf2    | chromosome 14 open reading frame 2               | Multiple_Complex |
| TC0100014227.hg.1 | 10.36 | 7.08  | 9.71   | 6.90E-13 | 3.55E-11 | MAGOH      | mago homolog, exon junction complex core c       | Multiple_Complex |
| TC1100009202.hg.1 | 7.96  | 11.32 | -10.23 | 6.90E-13 | 3.55E-11 | CD3G       | CD3g molecule, gamma (CD3-TCR complex)           | Multiple_Complex |
| TC0100010243.hg.1 | 8.68  | 13.12 | -21.78 | 7.05E-13 | 3.62E-11 | PYHIN1     | pyrin and HIN domain family, member 1            | Multiple_Complex |
| TC0500011672.hg.1 | 12.23 | 10.44 | 3.46   | 7.11E-13 | 3.64E-11 | PJA2       | praja ring finger 2, E3 ubiquitin protein ligase | Multiple_Complex |
| TC0700011770.hg.1 | 7.78  | 9.96  | -4.55  | 7.12E-13 | 3.64E-11 | KRIT1      | KRIT1, ankyrin repeat containing                 | Multiple_Complex |
| TC0100016302.hg.1 | 6.8   | 9.14  | -5.09  | 7.69E-13 | 3.92E-11 | CD247      | CD247 molecule                                   | Multiple_Complex |
| TC1800009284.hg.1 | 11.12 | 8.92  | 4.58   | 7.79E-13 | 3.96E-11 | C18orf32   | chromosome 18 open reading frame 32              | Multiple_Complex |
| TC1600011355.hg.1 | 8.56  | 10.37 | -3.5   | 7.82E-13 | 3.96E-11 | NPIPA1     | nuclear pore complex interacting protein fami    | Multiple_Complex |
| TC1400010612.hg.1 | 7.75  | 9.63  | -3.7   | 8.00E-13 | 4.05E-11 | PCNXL4     | pecanex-like 4 (Drosophila)                      | Multiple_Complex |
| TC1100008041.hg.1 | 9.59  | 13.31 | -13.17 | 8.06E-13 | 4.07E-11 | CTSW       | cathepsin W                                      | Multiple_Complex |
| TC2000007083.hg.1 | 5.58  | 3.53  | 4.14   | 8.37E-13 | 4.21E-11 | ID1        | inhibitor of DNA binding 1, dominant negative    | Multiple_Complex |
| TC0100017761.hg.1 | 5.94  | 7.94  | -4     | 8.45E-13 | 4.24E-11 | PCNXL2     | pecanex-like 2 (Drosophila)                      | Multiple_Complex |
| TC0X00011310.hg.1 | 9.96  | 5.8   | 17.87  | 8.53E-13 | 4.27E-11 | RPL36A-HN  | RPL36A-HNRNPH2 readthrough                       | Coding           |
| TC1400009998.hg.1 | 10.21 | 6.25  | 15.53  | 8.75E-13 | 4.37E-11 | NDUFB1     | NADH dehydrogenase (ubiquinone) 1 beta sub       | Multiple_Complex |
| TC0300006714.hg.1 | 10.33 | 8.34  | 3.99   | 8.89E-13 | 4.44E-11 | EAF1       | ELL associated factor 1                          | Multiple_Complex |
| TC0900008441.hg.1 | 10.45 | 7.99  | 5.52   | 8.98E-13 | 4.47E-11 | UGCG       | UDP-glucose ceramide glucosyltransferase         | Multiple_Complex |
| TC1200008182.hg.1 | 13.79 | 11.73 | 4.17   | 9.08E-13 | 4.51E-11 | RAB21      | RAB21, member RAS oncogene family                | Multiple_Complex |
| TC1000011606.hg.1 | 9.68  | 7.17  | 5.69   | 9.13E-13 | 4.52E-11 | BLOC1S2    | biogenesis of lysosomal organelles complex-1,    | Multiple_Complex |
| TC1600011487.hg.1 | 9.4   | 11.47 | -4.22  | 9.14E-13 | 4.52E-11 | NPIPA8     | nuclear pore complex interacting protein fami    | Coding           |
| TC0100013882.hg.1 | 9.53  | 11.56 | -4.09  | 9.44E-13 | 4.65E-11 | FOXJ3      | forkhead box J3                                  | Multiple_Complex |
| TC1500006925.hg.1 | 11.14 | 6.99  | 17.81  | 9.68E-13 | 4.76E-11 | THBS1      | thrombospondin 1                                 | Multiple_Complex |
| TC1600011520.hg.1 | 6.95  | 9.88  | -7.61  | 9.93E-13 | 4.87E-11 | 1-Sep      | septin 1                                         | Multiple_Complex |
| TC2000009259.hg.1 | 6.01  | 8.11  | -4.27  | 9.97E-13 | 4.88E-11 | NCOA5      | nuclear receptor coactivator 5                   | Multiple_Complex |
| TC1500010744.hg.1 | 5.94  | 3.93  | 4.01   | 1.05E-12 | 5.13E-11 | GCOM1; M   | GRINL1A complex locus 1; myocardial zonula       | Multiple_Complex |
| TC1900011951.hg.1 | 4.95  | 7.27  | -4.99  | 1.07E-12 | 5.23E-11 | ZNF780B    | zinc finger protein 780B                         | Multiple_Complex |
| TC1600008007.hg.1 | 12.52 | 9.73  | 6.89   | 1.08E-12 | 5.23E-11 | ADGRG3     | adhesion G protein-coupled receptor G3           | Multiple_Complex |
| TC0200016591.hg.1 | 12.1  | 9.7   | 5.29   | 1.08E-12 | 5.25E-11 | BZW1       | basic leucine zipper and W2 domains 1            | Multiple_Complex |
| TC2000006559.hg.1 | 7.33  | 9.94  | -6.1   | 1.09E-12 | 5.26E-11 | CDC25B     | cell division cycle 25B                          | Multiple_Complex |
| TC2200007406.hg.1 | 11.7  | 10.1  | 3.03   | 1.09E-12 | 5.26E-11 | ATF4       | activating transcription factor 4                | Multiple_Complex |
| TC1100008049.hg.1 | 8.1   | 10.74 | -6.24  | 1.09E-12 | 5.27E-11 | BANF1      | barrier to autointegration factor 1              | Multiple_Complex |
| TC1700010190.hg.1 | 8.79  | 6.9   | 3.71   | 1.10E-12 | 5.29E-11 | IFT20      | intraflagellar transport 20                      | Multiple_Complex |
| TC1200007430.hg.1 | 8.62  | 6.67  | 3.88   | 1.11E-12 | 5.31E-11 | SCAF11     | Memczak2013 ANTISENSE, CDS, coding, INTEF        | NonCoding        |
| TC0100018496.hg.1 | 5.85  | 8.12  | -4.83  | 1.11E-12 | 5.31E-11 | PYG02      | pygopus family PHD finger 2                      | Coding           |
| TC1300007491.hg.1 | 7.89  | 5.55  | 5.06   | 1.11E-12 | 5.31E-11 | KLF5       | Kruppel-like factor 5 (intestinal)               | Multiple_Complex |
| TC2100006854.hg.1 | 9.69  | 5.68  | 16.08  | 1.15E-12 | 5.50E-11 | MAP3K7CL   | MAP3K7 C-terminal like                           | Multiple_Complex |
| TC0X00011277.hg.1 | 8.91  | 11.6  | -6.49  | 1.17E-12 | 5.56E-11 | CA5B       | carbonic anhydrase VB, mitochondrial             | Multiple_Complex |
| TC1200012764.hg.1 | 5.48  | 7.45  | -3.92  | 1.18E-12 | 5.62E-11 | PRH1; TAS2 | proline-rich protein Haelll subfamily 1; taste r | Multiple_Complex |
| TC0600012875.hg.1 | 10    | 12.35 | -5.08  | 1.23E-12 | 5.81E-11 | FYN        | FYN proto-oncogene, Src family tyrosine kinas    | Multiple_Complex |
| TC0300013090.hg.1 | 12    | 14.08 | -4.22  | 1.24E-12 | 5.85E-11 | PHC3       | polyhomeotic homolog 3 (Drosophila)              | Multiple_Complex |
| TC0900008790.hg.1 | 8.1   | 6.34  | 3.41   | 1.24E-12 | 5.85E-11 | ZBTB43     | zinc finger and BTB domain containing 43         | Multiple_Complex |
| TC1900009432.hg.1 | 7.24  | 8.45  | -2.33  | 1.26E-12 | 5.92E-11 | DENND1C    | DENN/MADD domain containing 1C                   | Multiple_Complex |
| TC0100011001.hg.1 | 15.05 | 10.95 | 17.2   | 1.29E-12 | 6.08E-11 | RGS18      | regulator of G-protein signaling 18              | Multiple_Complex |
| TC0100016120.hg.1 | 5.91  | 7.84  | -3.82  | 1.30E-12 | 6.10E-11 | PIGM       | phosphatidylinositol glycan anchor biosynthes    | Coding           |
| TC0700013327.hg.1 | 6.5   | 8.52  | -4.06  | 1.32E-12 | 6.18E-11 | CHST12     | carbohydrate (chondroitin 4) sulfotransferase    | Coding           |
| TC0100014846.hg.1 | 10.52 | 7.68  | 7.17   | 1.33E-12 | 6.22E-11 | GTF2B      | general transcription factor IIB                 | Multiple_Complex |
| TC0800007738.hg.1 | 16.67 | 13.39 | 9.73   | 1.34E-12 | 6.25E-11 | SDCBP      | syndecan binding protein                         | Multiple_Complex |
| TC0700008450.hg.1 | 11.39 | 8.82  | 5.98   | 1.35E-12 | 6.25E-11 | LMTK2      | lemur tyrosine kinase 2                          | Multiple_Complex |
| TC2000007133.hg.1 | 12.91 | 11.43 | 2.8    | 1.35E-12 | 6.27E-11 | MAPRE1     | microtubule-associated protein, RP/EB family,    | Multiple_Complex |
| TC1600008199.hg.1 | 6.96  | 8.61  | -3.14  | 1.38E-12 | 6.36E-11 | ZFP90      | ZFP90 zinc finger protein                        | Multiple_Complex |
| TC1000012011.hg.1 | 11.85 | 8.77  | 8.48   | 1.38E-12 | 6.38E-11 | RGS10      | regulator of G-protein signaling 10              | Multiple_Complex |
| TC0400009694.hg.1 | 7.08  | 5.28  | 3.47   | 1.39E-12 | 6.42E-11 | ATP5I      | ATP synthase, H+ transporting, mitochondrial     | Multiple_Complex |
| TC2100007492.hg.1 | 11.73 | 10.29 | 2.72   | 1.41E-12 | 6.47E-11 | U2AF1      | U2 small nuclear RNA auxiliary factor 1          | Multiple_Complex |
| TC0200009065.hg.1 | 9.29  | 6.51  | 6.85   | 1.44E-12 | 6.62E-11 | DBI        | diazepam binding inhibitor (GABA receptor mi     | Multiple_Complex |
| TC0800012287.hg.1 | 11.76 | 13.22 | -2.75  | 1.46E-12 | 6.67E-11 | LEPROTL1   | leptin receptor overlapping transcript-like 1    | Multiple_Complex |
| TC1100010962.hg.1 | 11.07 | 14.5  | -10.74 | 1.52E-12 | 6.95E-11 | MPEG1      | macrophage expressed 1                           | Coding           |
| TC0100009903.hg.1 | 8.61  | 10.48 | -3.67  | 1.53E-12 | 6.95E-11 | RPRD2      | regulation of nuclear pre-mRNA domain conta      | Multiple_Complex |
| TC0500010553.hg.1 | 17.21 | 18.92 | -3.28  | 1.53E-12 | 6.95E-11 | FYB        | FYN binding protein                              | Multiple_Complex |
| TC0300007679.hg.1 | 12.06 | 13.86 | -3.49  | 1.57E-12 | 7.13E-11 | ATXN7      | ataxin 7                                         | Multiple_Complex |
| TC0600008632.hg.1 | 4.98  | 6.7   | -3.3   | 1.59E-12 | 7.20E-11 | BCKDHB     | branched chain keto acid dehydrogenase E1, t     | Multiple_Complex |
| TC1100008330.hg.1 | 7.06  | 9.45  | -5.23  | 1.60E-12 | 7.21E-11 | IL18BP     | interleukin 18 binding protein                   | Multiple_Complex |
| TC0900012278.hg.1 | 6.29  | 7.88  | -3.01  | 1.64E-12 | 7.37E-11 | ST6GALNA4  | ST6 (alpha-N-acetyl-neuraminy)-2,3-beta-gala     | Multiple_Complex |
| TC0700012182.hg.1 | 16.15 | 12.33 | 14.14  | 1.69E-12 | 7.59E-11 | NAMPT      | nicotinamide phosphoribosyltransferase           | Multiple_Complex |
| TC1400009839.hg.1 | 9.2   | 6.69  | 5.7    | 1.71E-12 | 7.68E-11 | STON2      | stonin 2                                         | Multiple_Complex |
| TC0800011062.hg.1 | 10.15 | 6.84  | 9.92   | 1.73E-12 | 7.74E-11 | NBN        | Transcript Identified by AceView, Entrez Gene    | Unassigned       |
| TC1000007885.hg.1 | 12.85 | 10.24 | 6.11   | 1.76E-12 | 7.85E-11 | SRGN       | Transcript Identified by AceView, Entrez Gene    | Coding           |
| TC1100012186.hg.1 | 5.85  | 7.48  | -3.09  | 1.78E-12 | 7.93E-11 | MSANTD4    | Myb/SANT-like DNA-binding domain containir       | Multiple_Complex |
| TC0100015858.hg.1 | 19.54 | 11.66 | 236.45 | 1.80E-12 | 8.00E-11 | S100A8     | S100 calcium binding protein A8                  | Multiple_Complex |
| TC0200007049.hg.1 | 6.08  | 7.94  | -3.64  | 1.81E-12 | 8.04E-11 | TMEM214    | transmembrane protein 214                        | Multiple_Complex |
| TC0700012131.hg.1 | 6.75  | 8.44  | -3.22  | 1.82E-12 | 8.05E-11 | ORC5       | origin recognition complex subunit 5             | Multiple_Complex |

|                      |       |       |        |          |          |           |                                                   |                  |
|----------------------|-------|-------|--------|----------|----------|-----------|---------------------------------------------------|------------------|
| TC1300008840.hg.1    | 17.75 | 15.55 | 4.59   | 1.83E-12 | 8.10E-11 | LCP1      | lymphocyte cytosolic protein 1 (L-plastin)        | Multiple_Complex |
| TC0600008663.hg.1    | 6.54  | 8.25  | -3.25  | 1.84E-12 | 8.13E-11 | DOPEY1    | dopey family member 1                             | Multiple_Complex |
| TC1500007601.hg.1    | 4.5   | 6.21  | -3.28  | 1.90E-12 | 8.36E-11 | HACD3     | 3-hydroxyacyl-CoA dehydratase 3                   | Multiple_Complex |
| TC0500011502.hg.1    | 12.31 | 10.27 | 4.11   | 1.91E-12 | 8.37E-11 | ELL2      | elongation factor, RNA polymerase II, 2           | Multiple_Complex |
| TC1700012470.hg.1    | 15.8  | 13.65 | 4.43   | 1.91E-12 | 8.37E-11 | H3F3B     | H3 histone, family 3B (H3.3B)                     | Multiple_Complex |
| TC0500007075.hg.1    | 14.81 | 9.85  | 31.12  | 1.92E-12 | 8.39E-11 | SUB1      | SUB1 homolog, transcriptional regulator           | Multiple_Complex |
| TC1600008329.hg.1    | 8.37  | 5.45  | 7.59   | 1.92E-12 | 8.39E-11 | HP        | haptoglobin                                       | Multiple_Complex |
| TC0100006723.hg.1    | 11.3  | 8.65  | 6.28   | 1.93E-12 | 8.39E-11 | VAMP3     | vesicle associated membrane protein 3             | Multiple_Complex |
| TC1500009669.hg.1    | 9.12  | 10.6  | -2.8   | 1.93E-12 | 8.39E-11 | VPS13C    | vacuolar protein sorting 13 homolog C (S. cere    | Multiple_Complex |
| TC0200015264.hg.1    | 10.72 | 7.4   | 10.02  | 1.93E-12 | 8.40E-11 | SDPR      | serum deprivation response                        | Multiple_Complex |
| TC0X00010837.hg.1    | 10.19 | 14.12 | -15.21 | 1.94E-12 | 8.40E-11 | MBNL3     | muscleblind-like splicing regulator 3             | Multiple_Complex |
| TC0200010523.hg.1    | 7     | 9.64  | -6.22  | 2.00E-12 | 8.63E-11 | CD28      | CD28 molecule                                     | Coding           |
| TC1100008955.hg.1    | 6.43  | 7.98  | -2.93  | 2.00E-12 | 8.63E-11 | AASDHPPT  | aminoadipate-semialdehyde dehydrogenase- $\alpha$ | Multiple_Complex |
| TC1700009036.hg.1    | 8.1   | 9.98  | -3.67  | 2.02E-12 | 8.71E-11 | TMC8      | transmembrane channel like 8                      | Multiple_Complex |
| TC1600011374.hg.1    | 9.48  | 11.1  | -3.07  | 2.05E-12 | 8.79E-11 | SPN       | sialophorin                                       | Multiple_Complex |
| TC0600011531.hg.1    | 5.59  | 7.67  | -4.22  | 2.06E-12 | 8.82E-11 | VPS52     | vacuolar protein sorting 52 homolog (S. cerevi    | Multiple_Complex |
| TC0900008345.hg.1    | 14.19 | 12.55 | 3.13   | 2.07E-12 | 8.88E-11 | RAD23B    | RAD23 homolog B, nucleotide excision repair i     | Multiple_Complex |
| TC1100012514.hg.1    | 7.96  | 9.74  | -3.44  | 2.09E-12 | 8.91E-11 | DPAGT1    | dolichyl-phosphate (UDP-N-acetylglucosamin        | Multiple_Complex |
| TC1700012089.hg.1    | 7.63  | 9.57  | -3.84  | 2.09E-12 | 8.91E-11 | DCXR      | dicarbonyl/L-xylulose reductase                   | Multiple_Complex |
| TC0100016357.hg.1    | 8.52  | 5.37  | 8.88   | 2.13E-12 | 9.06E-11 | SELP      | selectin P (granule membrane protein 140kDa       | Multiple_Complex |
| TC1100008505.hg.1    | 8.81  | 11.12 | -4.97  | 2.13E-12 | 9.06E-11 | EMSY      | EMSY BRCA2-interacting transcriptional repre      | Multiple_Complex |
| TC0700013426.hg.1    | 7.18  | 9.8   | -6.15  | 2.17E-12 | 9.20E-11 | PVRIG     | poliovirus receptor related immunoglobulin d      | Multiple_Complex |
| TC2200009273.hg.1    | 7.46  | 9.81  | -5.13  | 2.21E-12 | 9.36E-11 | APOBEC3F  | apolipoprotein B mRNA editing enzyme, catal       | Multiple_Complex |
| TC1300009766.hg.1    | 9.17  | 6.04  | 8.76   | 2.24E-12 | 9.45E-11 | IRS2      | Transcript Identified by AceView, Entrez Gene     | Unassigned       |
| TC0100015951.hg.1    | 7.37  | 8.87  | -2.83  | 2.27E-12 | 9.58E-11 | SCAMP3    | secretory carrier membrane protein 3              | Multiple_Complex |
| TC0100015182.hg.1    | 10.74 | 8.92  | 3.53   | 2.29E-12 | 9.63E-11 | TAF13     | TAF13 RNA polymerase II, TATA box binding p       | Multiple_Complex |
| TC1100012358.hg.1    | 6.19  | 8.73  | -5.81  | 2.29E-12 | 9.63E-11 | USP28     | ubiquitin specific peptidase 28                   | Multiple_Complex |
| TC0200011688.hg.1    | 10.71 | 8.93  | 3.43   | 2.30E-12 | 9.63E-11 | ADAM17    | ADAM metallopeptidase domain 17                   | Multiple_Complex |
| TC1300009492.hg.1    | 7.42  | 8.64  | -2.32  | 2.35E-12 | 9.81E-11 | TGDS      | TDP-glucose 4,6-dehydratase                       | Multiple_Complex |
| TC0500008308.hg.1    | 5.96  | 8.2   | -4.74  | 2.36E-12 | 9.85E-11 | WDR36     | WD repeat domain 36                               | Multiple_Complex |
| TC0100007886.hg.1    | 8.77  | 6.82  | 3.87   | 2.40E-12 | 1.00E-10 | NDUF55    | NADH dehydrogenase (ubiquinone) Fe-S prote        | Multiple_Complex |
| TC1900007743.hg.1    | 7.38  | 9.32  | -3.83  | 2.46E-12 | 1.02E-10 | ZNF507    | zinc finger protein 507                           | Multiple_Complex |
| TC1300008468.hg.1    | 6.95  | 8.58  | -3.11  | 2.50E-12 | 1.04E-10 | SLC46A3   | solute carrier family 46, member 3                | Multiple_Complex |
| TC0400009462.hg.1    | 7.25  | 5.25  | 4      | 2.52E-12 | 1.05E-10 | ING2      | inhibitor of growth family member 2               | Coding           |
| TC0700009676.hg.1    | 7.84  | 9.91  | -4.18  | 2.53E-12 | 1.05E-10 | GIMAP7    | GTPase, IMAP family member 7                      | Coding           |
| TC1100012037.hg.1    | 7.6   | 10.3  | -6.5   | 2.55E-12 | 1.05E-10 | MAML2     | mastermind-like transcriptional coactivator 2     | Multiple_Complex |
| TC1100011260.hg.1    | 6.19  | 8.21  | -4.05  | 2.57E-12 | 1.06E-10 | C11orf68  | chromosome 11 open reading frame 68               | Multiple_Complex |
| TSUnmapped00000054.h | 4.69  | 7.18  | -5.6   | 2.58E-12 | 1.06E-10 | ZNF780B   | zinc finger protein 780B                          | Coding           |
| TSUnmapped00000177.h | 4.69  | 7.18  | -5.6   | 2.58E-12 | 1.06E-10 | ZNF780B   | zinc finger protein 780B                          | Coding           |
| TC1100011192.hg.1    | 9.56  | 7.42  | 4.39   | 2.59E-12 | 1.06E-10 | ATG2A     | autophagy related 2A                              | Multiple_Complex |
| TC0200016581.hg.1    | 10.02 | 7.45  | 5.92   | 2.74E-12 | 1.12E-10 | C2orf88   | chromosome 2 open reading frame 88                | Multiple_Complex |
| TC1100007049.hg.1    | 9.81  | 8     | 3.52   | 2.76E-12 | 1.12E-10 | HTATIP2   | HIV-1 Tat interactive protein 2                   | Multiple_Complex |
| TC0200014693.hg.1    | 15.79 | 13.73 | 4.17   | 2.80E-12 | 1.14E-10 | CYTIP     | cytohesin 1 interacting protein                   | Multiple_Complex |
| TC0700007178.hg.1    | 13.11 | 10.86 | 4.78   | 2.86E-12 | 1.16E-10 | 7-Sep     | septin 7                                          | Multiple_Complex |
| TC1700010830.hg.1    | 12.76 | 6.91  | 57.69  | 2.92E-12 | 1.18E-10 | ITGA2B    | integrin alpha 2b                                 | Multiple_Complex |
| TC0500013166.hg.1    | 6.68  | 8.36  | -3.21  | 2.93E-12 | 1.19E-10 | ZNF131    | zinc finger protein 131                           | NonCoding        |
| TC0300010427.hg.1    | 8.01  | 10.26 | -4.77  | 2.99E-12 | 1.21E-10 | RFTN1     | raftlin, lipid raft linker 1                      | Multiple_Complex |
| TC1100007785.hg.1    | 8.69  | 11.32 | -6.21  | 3.01E-12 | 1.21E-10 | TMEM109   | transmembrane protein 109                         | Multiple_Complex |
| TC0200010214.hg.1    | 9.78  | 7.05  | 6.64   | 3.01E-12 | 1.21E-10 | ZC3H15    | zinc finger CCH-type containing 15                | Multiple_Complex |
| TC1200012584.hg.1    | 8.39  | 11.09 | -6.5   | 3.07E-12 | 1.23E-10 | TAPBPL    | TAP binding protein-like                          | Multiple_Complex |
| TC0600010709.hg.1    | 11.51 | 7.85  | 12.6   | 3.16E-12 | 1.27E-10 | F13A1     | coagulation factor XIII, A1 polypeptide           | Multiple_Complex |
| TC0200009440.hg.1    | 9.54  | 11.84 | -4.91  | 3.28E-12 | 1.31E-10 | R3HDM1    | R3H domain containing 1                           | Multiple_Complex |
| TC2000010001.hg.1    | 5.05  | 6.57  | -2.88  | 3.31E-12 | 1.32E-10 | PIGU      | phosphatidylinositol glycan anchor biosynthes     | Multiple_Complex |
| TC1500009782.hg.1    | 6.69  | 8.88  | -4.59  | 3.34E-12 | 1.33E-10 | PDCD7     | programmed cell death 7                           | Multiple_Complex |
| TC0300006925.hg.1    | 11.4  | 13.08 | -3.21  | 3.34E-12 | 1.33E-10 | TGFBR2    | transforming growth factor beta receptor II       | Multiple_Complex |
| TC0800008770.hg.1    | 11.37 | 9.73  | 3.13   | 3.48E-12 | 1.38E-10 | RNF139    | ring finger protein 139                           | Multiple_Complex |
| TC0300012918.hg.1    | 15.27 | 12.89 | 5.2    | 3.49E-12 | 1.38E-10 | CCNL1     | cyclin L1                                         | Multiple_Complex |
| TC0300011988.hg.1    | 4.72  | 6.65  | -3.83  | 3.51E-12 | 1.39E-10 | GCSAM     | germinal center-associated, signaling and mot     | Coding           |
| TC0700011554.hg.1    | 9.49  | 10.74 | -2.37  | 3.52E-12 | 1.39E-10 | PMS1P3    | PMS1 homolog 2, mismatch repair system cor        | Multiple_Complex |
| TC1100011372.hg.1    | 8.43  | 5.84  | 6.01   | 3.53E-12 | 1.39E-10 | CHKA      | choline kinase alpha                              | Multiple_Complex |
| TC0100006852.hg.1    | 8.46  | 10.56 | -4.28  | 3.57E-12 | 1.40E-10 | UBIAD1    | UbiA prenyltransferase domain containing 1        | Multiple_Complex |
| TC1100010705.hg.1    | 9.64  | 11.25 | -3.05  | 3.57E-12 | 1.40E-10 | AMBRA1    | autophagy/beclin-1 regulator 1                    | Multiple_Complex |
| TSUnmapped00000670.h | 5.45  | 7.56  | -4.32  | 3.63E-12 | 1.42E-10 | ZNF780A   | zinc finger protein 780A                          | Coding           |
| TC2200006855.hg.1    | 6.74  | 5.18  | 2.95   | 3.76E-12 | 1.47E-10 | RGL4      | ral guanine nucleotide dissociation stimulator    | Multiple_Complex |
| TC0700008878.hg.1    | 8.79  | 6.17  | 6.16   | 3.87E-12 | 1.51E-10 | CAPZA2    | capping protein (actin filament) muscle Z-line,   | Multiple_Complex |
| TC2200009283.hg.1    | 6.11  | 7.9   | -3.46  | 3.93E-12 | 1.53E-10 | PRR5      | proline rich 5 (renal)                            | Multiple_Complex |
| TC0100012869.hg.1    | 5.9   | 8.08  | -4.54  | 3.94E-12 | 1.54E-10 | SRM       | spermidine synthase                               | Multiple_Complex |
| TC0X00006697.hg.1    | 8.84  | 7.24  | 3.02   | 4.05E-12 | 1.57E-10 | SYAP1     | synapse associated protein 1                      | Multiple_Complex |
| TC0300012048.hg.1    | 9.66  | 11.88 | -4.66  | 4.11E-12 | 1.60E-10 | ZBTB20; M | zinc finger and BTB domain containing 20; mic     | Multiple_Complex |
| TC0100016685.hg.1    | 5.95  | 7.57  | -3.06  | 4.12E-12 | 1.60E-10 | TRMT1L    | tRNA methyltransferase 1 like                     | Multiple_Complex |

|                   |       |       |        |          |          |                                                          |                  |
|-------------------|-------|-------|--------|----------|----------|----------------------------------------------------------|------------------|
| TC0900007085.hg.1 | 9.18  | 10.92 | -3.34  | 4.16E-12 | 1.61E-10 | TESK1; MIR testis-specific kinase 1; microRNA 4667       | Multiple_Complex |
| TC0100011270.hg.1 | 5.94  | 8.34  | -5.28  | 4.23E-12 | 1.63E-10 | LAX1 lymphocyte transmembrane adaptor 1                  | Multiple_Complex |
| TC0600014259.hg.1 | 9.55  | 11.09 | -2.9   | 4.27E-12 | 1.64E-10 | ATP6V1G2-ATP6V1G2-DDX39B readthrough (NMD candic         | Multiple_Complex |
| TC0100012101.hg.1 | 7.21  | 8.95  | -3.34  | 4.28E-12 | 1.65E-10 | MTR 5-methyltetrahydrofolate-homocysteine metf           | Multiple_Complex |
| TC0300008361.hg.1 | 6.22  | 7.79  | -2.97  | 4.32E-12 | 1.66E-10 | SIDT1 SID1 transmembrane family, member 1                | Multiple_Complex |
| TC0600012763.hg.1 | 5.37  | 7.47  | -4.29  | 4.42E-12 | 1.69E-10 | SCML4 sex comb on midleg-like 4 (Drosophila)             | Multiple_Complex |
| TC1900008252.hg.1 | 7.14  | 8.95  | -3.49  | 4.46E-12 | 1.71E-10 | ZNF224 zinc finger protein 224                           | Multiple_Complex |
| TC1100013001.hg.1 | 7.18  | 5.5   | 3.21   | 4.52E-12 | 1.73E-10 | CLP1 cleavage and polyadenylation factor I subunit       | Coding           |
| TC1600007030.hg.1 | 9.17  | 10.83 | -3.16  | 4.63E-12 | 1.76E-10 | NPIPA7; NP nuclear pore complex interacting protein fami | Multiple_Complex |
| TC1900011779.hg.1 | 7.65  | 10.37 | -6.59  | 4.67E-12 | 1.77E-10 | FLT3LG fms-related tyrosine kinase 3 ligand              | Multiple_Complex |
| TC1000011718.hg.1 | 7.7   | 10.14 | -5.45  | 4.68E-12 | 1.78E-10 | CALHM2 calcium homeostasis modulator 2                   | Multiple_Complex |
| TC0900010825.hg.1 | 10.44 | 8.64  | 3.48   | 4.70E-12 | 1.78E-10 | NINJ1 ninjurin 1                                         | Multiple_Complex |
| TC0100008664.hg.1 | 8.83  | 6.94  | 3.69   | 4.95E-12 | 1.87E-10 | GADD45A growth arrest and DNA-damage-inducible, alp      | Multiple_Complex |
| TC1800008035.hg.1 | 12.83 | 10.59 | 4.72   | 4.98E-12 | 1.88E-10 | PPP4R1 protein phosphatase 4, regulatory subunit 1       | Multiple_Complex |
| TC0100013153.hg.1 | 5.56  | 7.23  | -3.18  | 5.04E-12 | 1.90E-10 | TMCO4 transmembrane and coiled-coil domains 4            | Multiple_Complex |
| TC0200012161.hg.1 | 7.36  | 4.17  | 9.15   | 5.20E-12 | 1.96E-10 | GALNT14 polypeptide N-acetylgalactosaminyltransferas     | Multiple_Complex |
| TC1600009935.hg.1 | 7.85  | 10.88 | -8.19  | 5.23E-12 | 1.96E-10 | SPN Memczak2013 ANTISENSE, CDS, coding, INTEF            | NonCoding        |
| TC1100013193.hg.1 | 7.49  | 10.97 | -11.1  | 5.28E-12 | 1.98E-10 | PTPRCAP protein tyrosine phosphatase, receptor type, C   | Multiple_Complex |
| TC1200006555.hg.1 | 11.76 | 13.84 | -4.22  | 5.30E-12 | 1.99E-10 | CCND2 cyclin D2                                          | Multiple_Complex |
| TC0100017793.hg.1 | 10.45 | 8.27  | 4.52   | 5.39E-12 | 2.01E-10 | IRF2BP2 interferon regulatory factor 2 binding protein   | Multiple_Complex |
| TC0200009938.hg.1 | 8.33  | 10.17 | -3.59  | 5.40E-12 | 2.02E-10 | GORASP2 golgi reassembly stacking protein 2              | Multiple_Complex |
| TC1600008275.hg.1 | 7.47  | 9.04  | -2.97  | 5.47E-12 | 2.04E-10 | SF3B3 splicing factor 3b subunit 3                       | Multiple_Complex |
| TC2000007682.hg.1 | 10.19 | 8.55  | 3.11   | 5.50E-12 | 2.05E-10 | CEBPB CCAAT/enhancer binding protein (C/EBP), bet        | Multiple_Complex |
| TC1900008166.hg.1 | 10.31 | 14.7  | -20.97 | 5.53E-12 | 2.05E-10 | CD79A CD79a molecule, immunoglobulin-associated          | Multiple_Complex |
| TC0400008947.hg.1 | 7.88  | 9.67  | -3.46  | 5.65E-12 | 2.09E-10 | TMEM184C transmembrane protein 184C                      | Multiple_Complex |
| TC0200010643.hg.1 | 7.87  | 9.32  | -2.72  | 5.68E-12 | 2.10E-10 | RPE ribulose-5-phosphate-3-epimerase                     | Multiple_Complex |
| TC0700006980.hg.1 | 11.24 | 9.08  | 4.49   | 5.69E-12 | 2.10E-10 | CBX3 chromobox homolog 3                                 | Multiple_Complex |
| TC1600011578.hg.1 | 6.28  | 7.47  | -2.28  | 5.70E-12 | 2.10E-10 | FBXO31 F-box protein 31                                  | Multiple_Complex |
| TC1000006782.hg.1 | 7.36  | 4.85  | 5.68   | 5.81E-12 | 2.14E-10 | ECHDC3 enoyl-CoA hydratase domain containing 3           | Multiple_Complex |
| TC1300009505.hg.1 | 8.66  | 6.46  | 4.6    | 6.24E-12 | 2.29E-10 | ABCC4 ATP binding cassette subfamily C member 4          | Multiple_Complex |
| TC1800008655.hg.1 | 9.31  | 10.55 | -2.36  | 6.26E-12 | 2.30E-10 | DYM dymeclin                                             | Multiple_Complex |
| TC1900008180.hg.1 | 5.77  | 7.88  | -4.33  | 6.32E-12 | 2.31E-10 | ZNF526 zinc finger protein 526                           | Coding           |
| TC0100010625.hg.1 | 5     | 6.9   | -3.72  | 6.39E-12 | 2.33E-10 | FASLG Fas ligand (TNF superfamily, member 6)             | Coding           |
| TC0500012663.hg.1 | 9.33  | 7.3   | 4.08   | 6.42E-12 | 2.34E-10 | SLU7 SLU7 homolog, splicing factor                       | Multiple_Complex |
| TC1000011892.hg.1 | 8.99  | 6.76  | 4.71   | 6.45E-12 | 2.35E-10 | CCDC186; I coiled-coil domain containing 186; microRNA   | Multiple_Complex |
| TC1800006508.hg.1 | 14.26 | 11.44 | 7.03   | 6.49E-12 | 2.36E-10 | MYL12B myosin light chain 12B                            | Coding           |
| TC0500012957.hg.1 | 9.55  | 7.75  | 3.46   | 6.68E-12 | 2.43E-10 | UIMC1 ubiquitin interaction motif containing 1           | Multiple_Complex |
| TC0300014043.hg.1 | 9.78  | 7.47  | 4.94   | 6.82E-12 | 2.47E-10 | ISY1 ISY1 splicing factor homolog                        | Multiple_Complex |
| TC0400010784.hg.1 | 6.98  | 8.44  | -2.75  | 6.84E-12 | 2.47E-10 | NOA1 nitric oxide associated 1                           | Multiple_Complex |
| TC0200016403.hg.1 | 6.45  | 8.54  | -4.28  | 6.99E-12 | 2.52E-10 | LPIN1; MIR lipin 1; microRNA 548s                        | Multiple_Complex |
| TC1900010707.hg.1 | 7.35  | 6.09  | 2.39   | 7.08E-12 | 2.55E-10 | SERTAD3 SERTA domain containing 3                        | Multiple_Complex |
| TC1500007333.hg.1 | 7.77  | 9.52  | -3.37  | 7.10E-12 | 2.56E-10 | TCF12 transcription factor 12                            | Multiple_Complex |
| TC0600012544.hg.1 | 9.36  | 7.56  | 3.48   | 7.14E-12 | 2.57E-10 | RRAGD Ras-related GTP binding D                          | Multiple_Complex |
| TC1000010912.hg.1 | 12.02 | 10.74 | 2.43   | 7.24E-12 | 2.60E-10 | SARIA secretion associated, Ras related GTPase 1A        | Multiple_Complex |
| TC1500010757.hg.1 | 12.69 | 11.06 | 3.08   | 7.27E-12 | 2.60E-10 | RAB11A RAB11A, member RAS oncogene family                | Multiple_Complex |
| TC0600013528.hg.1 | 9.43  | 11.53 | -4.27  | 7.28E-12 | 2.60E-10 | LATS1 large tumor suppressor kinase 1                    | Multiple_Complex |
| TC0900011769.hg.1 | 4.69  | 7.4   | -6.57  | 7.36E-12 | 2.63E-10 | FAM78A family with sequence similarity 78, member A      | Multiple_Complex |
| TC0300010933.hg.1 | 7.42  | 9.01  | -3     | 7.43E-12 | 2.65E-10 | FYCO1 FYVE and coiled-coil domain containing 1           | Multiple_Complex |
| TC0800011171.hg.1 | 10.94 | 6.5   | 21.72  | 7.46E-12 | 2.65E-10 | UQCRB ubiquinol-cytochrome c reductase binding pro       | Multiple_Complex |
| TC0300012812.hg.1 | 6.17  | 8.36  | -4.55  | 7.60E-12 | 2.70E-10 | GPR171 G protein-coupled receptor 171                    | Coding           |
| TC0300010304.hg.1 | 8.16  | 6.07  | 4.25   | 7.65E-12 | 2.71E-10 | TMEM40 transmembrane protein 40                          | Multiple_Complex |
| TC0400006951.hg.1 | 9.38  | 12.74 | -10.27 | 7.71E-12 | 2.73E-10 | CD38 CD38 molecule                                       | Multiple_Complex |
| TC0100011022.hg.1 | 17.06 | 11.9  | 35.75  | 7.78E-12 | 2.74E-10 | RGS2 regulator of G-protein signaling 2                  | Multiple_Complex |
| TC1500009492.hg.1 | 9.62  | 6.6   | 8.14   | 7.78E-12 | 2.74E-10 | RSL24D1 ribosomal L24 domain containing 1                | Multiple_Complex |
| TC0200013595.hg.1 | 9.44  | 11.56 | -4.34  | 7.80E-12 | 2.75E-10 | MGAT4A mannosyl (alpha-1,3-)-glycoprotein beta-1,4-N     | Multiple_Complex |
| TC0600014217.hg.1 | 13.72 | 11.28 | 5.42   | 8.01E-12 | 2.82E-10 | SERPINB1 serpin peptidase inhibitor, clade B (ovalbumin  | Multiple_Complex |
| TC1900007447.hg.1 | 8.04  | 9.92  | -3.66  | 8.09E-12 | 2.84E-10 | ZNF101 zinc finger protein 101                           | Multiple_Complex |
| TC0900011151.hg.1 | 5.33  | 6.94  | -3.05  | 8.19E-12 | 2.87E-10 | TMEM245 transmembrane protein 245                        | Multiple_Complex |
| TC1400007307.hg.1 | 10.91 | 8.83  | 4.22   | 8.19E-12 | 2.87E-10 | ARID4A AT rich interactive domain 4A (RBP1-like)         | Multiple_Complex |
| TC0200008984.hg.1 | 6.51  | 7.9   | -2.62  | 8.23E-12 | 2.88E-10 | RABL2A RAB, member of RAS oncogene family-like 2A        | Multiple_Complex |
| TC1200008003.hg.1 | 10.84 | 8.78  | 4.18   | 8.29E-12 | 2.89E-10 | TBK1 TANK-binding kinase 1                               | Multiple_Complex |
| TC0100018462.hg.1 | 7.79  | 9.09  | -2.46  | 8.37E-12 | 2.91E-10 | CLCC1 chloride channel CLIC-like 1                       | Multiple_Complex |
| TC0400009467.hg.1 | 7.64  | 9.46  | -3.54  | 8.43E-12 | 2.93E-10 | TRAPPC11 trafficking protein particle complex 11         | Multiple_Complex |
| TC1100012984.hg.1 | 5     | 7.13  | -4.39  | 8.55E-12 | 2.97E-10 | NAT10 N-acetyltransferase 10 (GCN5-related)              | Multiple_Complex |
| TC1000010925.hg.1 | 8.87  | 12.52 | -12.59 | 8.65E-12 | 3.00E-10 | PRF1 porfirin 1 (pore forming protein)                   | Multiple_Complex |
| TC0500008855.hg.1 | 7.93  | 9.76  | -3.56  | 9.06E-12 | 3.13E-10 | SLC35A4 solute carrier family 35, member A4              | Multiple_Complex |
| TC1800009229.hg.1 | 10.22 | 11.8  | -2.99  | 9.07E-12 | 3.13E-10 | SMAD4 SMAD family member 4                               | Multiple_Complex |
| TC0600011197.hg.1 | 5.81  | 7.35  | -2.9   | 9.08E-12 | 3.13E-10 | ZNF184 zinc finger protein 184                           | Multiple_Complex |
| TC1600009137.hg.1 | 6.44  | 4.87  | 2.98   | 9.15E-12 | 3.15E-10 | TCEB2 transcription elongation factor B (SIII), polypep  | Multiple_Complex |
| TC1700007451.hg.1 | 12.55 | 9.76  | 6.89   | 9.20E-12 | 3.16E-10 | CPD carboxypeptidase D                                   | Multiple_Complex |

|                      |       |       |        |          |          |           |                                                  |                  |
|----------------------|-------|-------|--------|----------|----------|-----------|--------------------------------------------------|------------------|
| TC1200012803.hg.1    | 13.81 | 10.47 | 10.14  | 9.24E-12 | 3.17E-10 | NACA      | nascent polypeptide-associated complex alpha     | Multiple_Complex |
| TC1000008385.hg.1    | 6.24  | 8.13  | -3.72  | 9.26E-12 | 3.17E-10 | STAMBPL1  | STAM binding protein-like 1                      | Multiple_Complex |
| TC1000012582.hg.1    | 5.96  | 4.89  | 2.11   | 9.33E-12 | 3.19E-10 | RRP12     | ribosomal RNA processing 12 homolog              | Multiple_Complex |
| TC1200008184.hg.1    | 10.72 | 7.97  | 6.73   | 9.38E-12 | 3.20E-10 | TBC1D15   | TBC1 domain family, member 15                    | Multiple_Complex |
| TC0400012048.hg.1    | 4.75  | 6.19  | -2.71  | 9.48E-12 | 3.23E-10 | ZNF827    | zinc finger protein 827                          | Multiple_Complex |
| TC0300013842.hg.1    | 8.82  | 7.04  | 3.42   | 9.63E-12 | 3.28E-10 | SLMAP     | sarcolemma associated protein                    | Multiple_Complex |
| TC1900011925.hg.1    | 5.17  | 7.34  | -4.52  | 9.70E-12 | 3.30E-10 | ZNF91     | zinc finger protein 91                           | NonCoding        |
| TC0300010561.hg.1    | 7.51  | 9.21  | -3.25  | 9.80E-12 | 3.33E-10 | SLC4A7    | solute carrier family 4, sodium bicarbonate co   | Multiple_Complex |
| TC0300011516.hg.1    | 13.31 | 11.53 | 3.42   | 9.84E-12 | 3.33E-10 | EIF4E3    | eukaryotic translation initiation factor 4E fami | Multiple_Complex |
| TC0100015899.hg.1    | 19.32 | 17.88 | 2.7    | 9.91E-12 | 3.35E-10 | TPM3      | tropomyosin 3                                    | Multiple_Complex |
| TC0100010609.hg.1    | 7.98  | 5.1   | 7.36   | 1.00E-11 | 3.38E-10 | DNM3      | dynamin 3                                        | Multiple_Complex |
| TC0X00007031.hg.1    | 13.2  | 11.21 | 3.97   | 1.01E-11 | 3.39E-10 | DDX3X     | DEAD (Asp-Glu-Ala-Asp) box helicase 3, X-link    | Multiple_Complex |
| TC0900011613.hg.1    | 5.4   | 8.51  | -8.66  | 1.01E-11 | 3.40E-10 | FAM102A   | family with sequence similarity 102, member      | Multiple_Complex |
| TC1900009588.hg.1    | 6.21  | 8.21  | -4.01  | 1.02E-11 | 3.43E-10 | ZNF121    | zinc finger protein 121                          | Multiple_Complex |
| TC0100010314.hg.1    | 6.61  | 9.16  | -5.87  | 1.05E-11 | 3.51E-10 | LY9       | lymphocyte antigen 9                             | Multiple_Complex |
| TC0100016356.hg.1    | 10.53 | 8.04  | 5.63   | 1.05E-11 | 3.53E-10 | F5        | coagulation factor V (proaccelerin, labile facto | Multiple_Complex |
| TC0100013998.hg.1    | 7.18  | 9.02  | -3.57  | 1.07E-11 | 3.57E-10 | HECTD3    | HECT domain containing E3 ubiquitin protein l    | Multiple_Complex |
| TC0400012857.hg.1    | 10.85 | 8.92  | 3.8    | 1.08E-11 | 3.60E-10 | RAPGEF2   | Rap guanine nucleotide exchange factor 2         | Multiple_Complex |
| TC0700012293.hg.1    | 5.77  | 7.83  | -4.17  | 1.10E-11 | 3.68E-10 | TMEM168   | transmembrane protein 168                        | Multiple_Complex |
| TC0100014910.hg.1    | 7.2   | 10.59 | -10.47 | 1.14E-11 | 3.79E-10 | TGFBR3    | transforming growth factor beta receptor III     | Multiple_Complex |
| TC2000008218.hg.1    | 6.91  | 8.55  | -3.12  | 1.14E-11 | 3.80E-10 | C20orf194 | chromosome 20 open reading frame 194             | Multiple_Complex |
| TC0X00009569.hg.1    | 7.35  | 8.84  | -2.8   | 1.15E-11 | 3.82E-10 | ZNF41     | zinc finger protein 41                           | Multiple_Complex |
| TC0300014047.hg.1    | 8.4   | 6.73  | 3.19   | 1.16E-11 | 3.85E-10 | ISY1-RAB4 | ISY1-RAB43 readthrough                           | Coding           |
| TC1200012574.hg.1    | 6.33  | 7.79  | -2.74  | 1.17E-11 | 3.87E-10 | TULP3     | tubby like protein 3                             | Multiple_Complex |
| TC0700012596.hg.1    | 6.75  | 8.38  | -3.09  | 1.17E-11 | 3.88E-10 | TMEM209   | transmembrane protein 209                        | Multiple_Complex |
| TC0700008762.hg.1    | 9.76  | 12.11 | -5.1   | 1.18E-11 | 3.91E-10 | CBLL1     | Cbl proto-oncogene-like 1, E3 ubiquitin protei   | Multiple_Complex |
| TC0400007879.hg.1    | 10.01 | 11.55 | -2.89  | 1.25E-11 | 4.10E-10 | USO1      | USO1 vesicle transport factor                    | Multiple_Complex |
| TC0300013934.hg.1    | 10.01 | 7.62  | 5.25   | 1.26E-11 | 4.15E-10 | EMC3      | ER membrane protein complex subunit 3            | Multiple_Complex |
| TC1100007301.hg.1    | 5.5   | 7.82  | -4.97  | 1.27E-11 | 4.18E-10 | PRR5L     | proline rich 5 like                              | Multiple_Complex |
| TC1200012842.hg.1    | 7.54  | 8.72  | -2.26  | 1.28E-11 | 4.18E-10 | ANAPC7    | anaphase promoting complex subunit 7             | Multiple_Complex |
| TC2000007928.hg.1    | 5.73  | 7.23  | -2.84  | 1.29E-11 | 4.21E-10 | ZNF831    | zinc finger protein 831                          | Coding           |
| TC1200009445.hg.1    | 9.13  | 10.65 | -2.86  | 1.29E-11 | 4.23E-10 | SFSWAP    | splicing factor, suppressor of white-apricot far | Multiple_Complex |
| TC0500009268.hg.1    | 9.28  | 7.5   | 3.43   | 1.30E-11 | 4.24E-10 | TTC1      | tetratricopeptide repeat domain 1                | Multiple_Complex |
| TC1700009651.hg.1    | 8.03  | 9.3   | -2.42  | 1.34E-11 | 4.36E-10 | TP53      | tumor protein p53                                | Multiple_Complex |
| TC1000012130.hg.1    | 6.57  | 8.26  | -3.22  | 1.34E-11 | 4.37E-10 | FAM53B    | Memczak2013 ALT_ACCEPTOR, ALT_DONOR,             | NonCoding        |
| TC0700011929.hg.1    | 9.99  | 8.26  | 3.3    | 1.36E-11 | 4.41E-10 | SMURF1    | SMAD specific E3 ubiquitin protein ligase 1      | Multiple_Complex |
| TC1200011914.hg.1    | 7.44  | 9.81  | -5.16  | 1.36E-11 | 4.41E-10 | HVCN1     | hydrogen voltage gated channel 1                 | Multiple_Complex |
| TC1300007755.hg.1    | 12.1  | 10.04 | 4.2    | 1.37E-11 | 4.43E-10 | DNAJC3    | DnaJ (Hsp40) homolog, subfamily C, member        | Multiple_Complex |
| TC1900008840.hg.1    | 13.54 | 11.06 | 5.56   | 1.38E-11 | 4.45E-10 | RPS9      | ribosomal protein S9                             | Multiple_Complex |
| TC1700010914.hg.1    | 8.22  | 10.54 | -5     | 1.38E-11 | 4.46E-10 | ARL17B    | ADP-ribosylation factor like GTPase 17B          | Multiple_Complex |
| TC2200007904.hg.1    | 10.29 | 7.92  | 5.15   | 1.39E-11 | 4.48E-10 | ATP6V1E1  | ATPase, H+ transporting, lysosomal 31kDa, V1     | Multiple_Complex |
| TC1000009865.hg.1    | 10.6  | 8.46  | 4.43   | 1.46E-11 | 4.72E-10 | FAM107B   | Memczak2013 ALT_ACCEPTOR, ALT_DONOR,             | NonCoding        |
| TC0600012542.hg.1    | 14.96 | 12.72 | 4.73   | 1.47E-11 | 4.73E-10 | UBE2J1    | ubiquitin-conjugating enzyme E2, J1              | Multiple_Complex |
| TC1100012687.hg.1    | 5.23  | 7.14  | -3.75  | 1.48E-11 | 4.77E-10 | MSANTD2   | Myb/SANT-like DNA-binding domain containir       | Multiple_Complex |
| TC1100011833.hg.1    | 8.17  | 9.47  | -2.46  | 1.53E-11 | 4.90E-10 | SYTL2     | synaptotagmin-like 2                             | Multiple_Complex |
| TC1000007404.hg.1    | 12.8  | 10.64 | 4.5    | 1.54E-11 | 4.93E-10 | CSGALNAC  | chondroitin sulfate N-acetylgalactosaminyltra    | Multiple_Complex |
| TC0300006556.hg.1    | 6.62  | 7.93  | -2.47  | 1.55E-11 | 4.94E-10 | OGG1      | 8-oxoguanine DNA glycosylase                     | Multiple_Complex |
| TC0400008053.hg.1    | 13.85 | 15.78 | -3.81  | 1.55E-11 | 4.95E-10 | AFF1      | AF4/FMR2 family, member 1                        | Multiple_Complex |
| TC0X00010643.hg.1    | 11.27 | 13.26 | -3.97  | 1.61E-11 | 5.14E-10 | 6-Sep     | septin 6                                         | Multiple_Complex |
| TC1200009881.hg.1    | 13.66 | 9.52  | 17.56  | 1.62E-11 | 5.14E-10 | CLEC2B    | C-type lectin domain family 2, member B          | Multiple_Complex |
| TC1600011353.hg.1    | 8.08  | 10.23 | -4.44  | 1.63E-11 | 5.18E-10 | NPIPA3    | nuclear pore complex interacting protein fami    | Multiple_Complex |
| TC0X00007709.hg.1    | 11.46 | 9.88  | 2.99   | 1.65E-11 | 5.22E-10 | PGK1      | phosphoglycerate kinase 1                        | Multiple_Complex |
| TSUnmapped00000398.h | 7.73  | 9.41  | -3.2   | 1.68E-11 | 5.31E-10 | KAT6B     | K(lysine) acetyltransferase 6B                   | Coding           |
| TC0500013232.hg.1    | 8.38  | 10.58 | -4.59  | 1.68E-11 | 5.31E-10 | SMAD5     | SMAD family member 5                             | Multiple_Complex |
| TC1200010946.hg.1    | 6.41  | 8.19  | -3.43  | 1.69E-11 | 5.35E-10 | NEMP1     | nuclear envelope integral membrane protein       | Multiple_Complex |
| TC1700009368.hg.1    | 11.78 | 10.03 | 3.38   | 1.76E-11 | 5.54E-10 | YWHAE     | tyrosine 3-monooxygenase/tryptophan 5-mor        | Multiple_Complex |
| TC0600012713.hg.1    | 8.25  | 9.75  | -2.84  | 1.76E-11 | 5.54E-10 | PREP      | prolyl endopeptidase                             | Multiple_Complex |
| TC1400007947.hg.1    | 10.82 | 9.27  | 2.92   | 1.77E-11 | 5.58E-10 | PSMC1     | proteasome 26S subunit, ATPase 1                 | Multiple_Complex |
| TC1600011354.hg.1    | 8.31  | 10.19 | -3.66  | 1.78E-11 | 5.59E-10 | NPIPA2    | nuclear pore complex interacting protein fami    | Coding           |
| TC0800008243.hg.1    | 8.61  | 10.08 | -2.78  | 1.80E-11 | 5.63E-10 | PDP1      | pyruvate dehydrogenase phosphatase catalytic     | Multiple_Complex |
| TC0X00009069.hg.1    | 7.69  | 5.32  | 5.17   | 1.80E-11 | 5.63E-10 | ARHGAP6   | Rho GTPase activating protein 6                  | Multiple_Complex |
| TC1200012758.hg.1    | 4.47  | 6.65  | -4.52  | 1.81E-11 | 5.66E-10 | TAS2R14   | taste receptor, type 2, member 14                | Coding           |
| TC0600006976.hg.1    | 7.37  | 5.59  | 3.46   | 1.86E-11 | 5.79E-10 | PHACTR1   | phosphatase and actin regulator 1                | Multiple_Complex |
| TC1700012438.hg.1    | 11.83 | 10.02 | 3.5    | 1.88E-11 | 5.86E-10 | SUPT4H1   | SPT4 homolog, DSIF elongation factor subunit     | Multiple_Complex |
| TC0100010798.hg.1    | 10.32 | 8.77  | 2.92   | 1.88E-11 | 5.86E-10 | QSOX1     | quiescin Q6 sulfhydryl oxidase 1                 | Multiple_Complex |
| TC2000007117.hg.1    | 10.46 | 8.75  | 3.28   | 1.88E-11 | 5.86E-10 | ASXL1     | additional sex combs like transcriptional regul  | Multiple_Complex |
| TC1200010413.hg.1    | 6.35  | 8.46  | -4.3   | 1.90E-11 | 5.89E-10 | ABCD2     | ATP binding cassette subfamily D member 2        | Multiple_Complex |
| TC2100007402.hg.1    | 6.66  | 8.3   | -3.12  | 1.92E-11 | 5.96E-10 | ADARB1    | adenosine deaminase, RNA-specific, B1            | Multiple_Complex |
| TC0500007729.hg.1    | 6.24  | 7.73  | -2.81  | 1.94E-11 | 5.99E-10 | MCCC2     | methylcrotonoyl-CoA carboxylase 2                | Multiple_Complex |
| TC1500010878.hg.1    | 6.49  | 8.31  | -3.52  | 1.94E-11 | 6.00E-10 | VWA9      | von Willebrand factor A domain containing 9      | Multiple_Complex |

|                     |       |       |       |          |          |            |                                                 |                  |
|---------------------|-------|-------|-------|----------|----------|------------|-------------------------------------------------|------------------|
| TC0200015631.hg.1   | 5.06  | 7.15  | -4.28 | 1.95E-11 | 6.01E-10 | IKZF2      | IKAROS family zinc finger 2                     | Multiple_Complex |
| TC0500007314.hg.1   | 9.12  | 11.37 | -4.74 | 1.98E-11 | 6.09E-10 | MRPS30     | mitochondrial ribosomal protein S30             | Multiple_Complex |
| TC1600007363.hg.1   | 8.08  | 6.25  | 3.54  | 1.99E-11 | 6.13E-10 | ATXN2L     | Transcript Identified by AceView, Entrez Gene   | Unassigned       |
| TC2200007982.hg.1   | 10.94 | 9.68  | 2.4   | 2.00E-11 | 6.13E-10 | UFD1L      | ubiquitin fusion degradation 1 like (yeast)     | Multiple_Complex |
| TC1600009777.hg.1   | 8.39  | 10.1  | -3.25 | 2.02E-11 | 6.21E-10 | ARHGAP17   | Rho GTPase activating protein 17                | Multiple_Complex |
| TC0200008071.hg.1   | 10.11 | 8.28  | 3.56  | 2.05E-11 | 6.27E-10 | MTHFD2     | methylenetetrahydrofolate dehydrogenase (N      | Multiple_Complex |
| TC1800008580.hg.1   | 10.81 | 7.3   | 11.34 | 2.07E-11 | 6.34E-10 | PSTPIP2    | proline-serine-threonine phosphatase interact   | Multiple_Complex |
| TC0900012161.hg.1   | 9.93  | 7.9   | 4.1   | 2.10E-11 | 6.42E-10 | DNAJC25-G  | DNAJC25-GNG10 readthrough                       | Coding           |
| TC0300011842.hg.1   | 5.97  | 7.64  | -3.18 | 2.18E-11 | 6.64E-10 | TOMM70A    | translocase of outer mitochondrial membrane     | Multiple_Complex |
| TC0300011899.hg.1   | 8.64  | 11.29 | -6.27 | 2.21E-11 | 6.74E-10 | CBLB       | Cbl proto-oncogene B, E3 ubiquitin protein lig  | Multiple_Complex |
| TC1500007518.hg.1   | 13.1  | 11.28 | 3.53  | 2.24E-11 | 6.81E-10 | RAB8B      | RAB8B, member RAS oncogene family               | Multiple_Complex |
| TC0300012233.hg.1   | 6.73  | 5.14  | 3.01  | 2.24E-11 | 6.82E-10 | ITGB5      | integrin beta 5                                 | Multiple_Complex |
| TC0100007326.hg.1   | 13.63 | 9.12  | 22.76 | 2.29E-11 | 6.93E-10 | RPL11      | ribosomal protein L11                           | Multiple_Complex |
| TC0900008463.hg.1   | 10.91 | 8.17  | 6.7   | 2.36E-11 | 7.14E-10 | HSDL2      | hydroxysteroid dehydrogenase like 2             | Multiple_Complex |
| TC0100008927.hg.1   | 12.29 | 10.35 | 3.84  | 2.37E-11 | 7.15E-10 | SH3GLB1    | SH3-domain GRB2-like endophilin B1              | Multiple_Complex |
| TC2000009975.hg.1   | 11.1  | 12.72 | -3.08 | 2.40E-11 | 7.25E-10 | TMEM230    | transmembrane protein 230                       | Multiple_Complex |
| TC0300012212.hg.1   | 8.45  | 6.13  | 4.98  | 2.40E-11 | 7.25E-10 | MYLK       | myosin light chain kinase                       | Multiple_Complex |
| TC0700013332.hg.1   | 11.29 | 12.54 | -2.39 | 2.45E-11 | 7.39E-10 | RBAK; RBAI | RB-associated KRAB zinc finger; RBAK-RBAKD      | Multiple_Complex |
| TC0800010807.hg.1   | 14.22 | 7.93  | 78.4  | 2.47E-11 | 7.42E-10 | RPL7       | ribosomal protein L7                            | Multiple_Complex |
| TC0900012115.hg.1   | 5.53  | 7.35  | -3.52 | 2.48E-11 | 7.45E-10 | MTAP       | methylthioadenosine phosphorylase               | Multiple_Complex |
| TC1100009611.hg.1   | 8.02  | 5.59  | 5.4   | 2.48E-11 | 7.45E-10 | JAM3       | junctional adhesion molecule 3                  | Multiple_Complex |
| TC1900007260.hg.1   | 14.51 | 12.54 | 3.9   | 2.49E-11 | 7.46E-10 | TPM4       | tropomyosin 4                                   | Multiple_Complex |
| TC0100017860.hg.1   | 7.27  | 8.98  | -3.27 | 2.51E-11 | 7.52E-10 | HEATR1     | HEAT repeat containing 1                        | Multiple_Complex |
| TC1000009095.hg.1   | 8.6   | 10.32 | -3.29 | 2.57E-11 | 7.67E-10 | SEC23IP    | SEC23 interacting protein                       | Multiple_Complex |
| TC0200012307.hg.1   | 9.72  | 11.32 | -3.03 | 2.58E-11 | 7.70E-10 | SOS1       | SOS Ras/Rac guanine nucleotide exchange fac     | Multiple_Complex |
| TC1100009207.hg.1   | 7.64  | 9.44  | -3.46 | 2.60E-11 | 7.73E-10 | KMT2A      | lysine (K)-specific methyltransferase 2A        | Multiple_Complex |
| TC0X00008911.hg.1   | 8.23  | 9.78  | -2.94 | 2.66E-11 | 7.89E-10 | P2RY8      | purinergic receptor P2Y, G-protein coupled, 8   | Multiple_Complex |
| TC0Y00006887.hg.1   | 8.23  | 9.78  | -2.94 | 2.66E-11 | 7.89E-10 | P2RY8      | Homo sapiens purinergic receptor P2Y, G-prot    | Multiple_Complex |
| TC1000008364.hg.1   | 13.23 | 9.62  | 12.26 | 2.66E-11 | 7.89E-10 | RP11-380G  | Jeck2013 ALT_ACCEPTOR, ALT_DONOR, codin         | NonCoding        |
| TC0100009395.hg.1   | 11.37 | 8.01  | 10.21 | 2.67E-11 | 7.92E-10 | CD53       | Memczak2013 ALT_ACCEPTOR, ALT_DONOR,            | NonCoding        |
| TC0700008745.hg.1   | 12.68 | 8.52  | 17.81 | 2.68E-11 | 7.94E-10 | PRKAR2B    | protein kinase, cAMP-dependent, regulatory,     | Multiple_Complex |
| TC0600008146.hg.1   | 10.9  | 13.17 | -4.82 | 2.73E-11 | 8.06E-10 | RUNX2      | runt-related transcription factor 2             | Multiple_Complex |
| TC0200010275.hg.1   | 8.26  | 10.19 | -3.82 | 2.74E-11 | 8.09E-10 | GLS        | glutaminase                                     | Multiple_Complex |
| TC0400007938.hg.1   | 11.76 | 14.08 | -5.01 | 2.83E-11 | 8.35E-10 | BMP2K      | BMP2 inducible kinase                           | Multiple_Complex |
| TC0100016715.hg.1   | 11.21 | 7.63  | 11.95 | 2.90E-11 | 8.53E-10 | PTGS2      | prostaglandin-endoperoxide synthase 2 (prost    | Multiple_Complex |
| TC0800010490.hg.1   | 6.94  | 8.21  | -2.42 | 2.92E-11 | 8.57E-10 | TMEM68     | transmembrane protein 68                        | Multiple_Complex |
| TC1200012844.hg.1   | 12.47 | 10.03 | 5.43  | 2.92E-11 | 8.57E-10 | ARPC3      | actin related protein 2/3 complex subunit 3     | NonCoding        |
| TC1500010945.hg.1   | 6.8   | 9.15  | -5.11 | 2.93E-11 | 8.59E-10 | LINS1      | lines homolog 1                                 | Multiple_Complex |
| TC0400007857.hg.1   | 6.63  | 4.71  | 3.79  | 2.95E-11 | 8.62E-10 | AREG       | amphiregulin                                    | Multiple_Complex |
| TSUnmapped0000361.h | 4.87  | 6.74  | -3.66 | 2.95E-11 | 8.62E-10 | RASA3      | RAS p21 protein activator 3                     | NonCoding        |
| TC1100007801.hg.1   | 9.8   | 11.57 | -3.41 | 2.95E-11 | 8.62E-10 | TMEM138    | transmembrane protein 138                       | Multiple_Complex |
| TC0300012718.hg.1   | 7.03  | 4.68  | 5.12  | 2.96E-11 | 8.63E-10 | PLOD2      | procollagen-lysine, 2-oxoglutarate 5-dioxygen   | Multiple_Complex |
| TC1700012352.hg.1   | 12.87 | 14.75 | -3.66 | 2.98E-11 | 8.68E-10 | TRAPPC1    | trafficking protein particle complex 1          | Multiple_Complex |
| TC0500010394.hg.1   | 6.23  | 7.97  | -3.35 | 3.03E-11 | 8.79E-10 | DROSHA     | drosha, ribonuclease type III                   | Multiple_Complex |
| TC2100007032.hg.1   | 5.22  | 7.3   | -4.23 | 3.03E-11 | 8.79E-10 | CBR1       | carbonyl reductase 1                            | Multiple_Complex |
| TC0400011424.hg.1   | 10.44 | 8.38  | 4.18  | 3.06E-11 | 8.88E-10 | H2AFZ      | H2A histone family, member Z                    | Multiple_Complex |
| TC1100007948.hg.1   | 10.4  | 7.4   | 8.03  | 3.08E-11 | 8.91E-10 | PRDX5      | peroxiredoxin 5                                 | Coding           |
| TC1000011969.hg.1   | 8.66  | 7.06  | 3.03  | 3.10E-11 | 8.95E-10 | FAM204A    | family with sequence similarity 204, member     | Multiple_Complex |
| TC0700006864.hg.1   | 6.94  | 8.48  | -2.91 | 3.12E-11 | 9.01E-10 | SP4        | Sp4 transcription factor                        | Multiple_Complex |
| TC0100009215.hg.1   | 10.61 | 12.29 | -3.2  | 3.14E-11 | 9.04E-10 | CDC14A     | cell division cycle 14A                         | Multiple_Complex |
| TC1100013012.hg.1   | 13.33 | 10.96 | 5.17  | 3.15E-11 | 9.07E-10 | STX3       | syntaxin 3                                      | Multiple_Complex |
| TC0100017260.hg.1   | 7.64  | 9.33  | -3.22 | 3.15E-11 | 9.07E-10 | NSL1       | NSL1, MIS12 kinetochore complex component       | Multiple_Complex |
| TC0200010567.hg.1   | 10    | 6.69  | 9.97  | 3.21E-11 | 9.22E-10 | EEF1B2; SN | eukaryotic translation elongation factor 1 beta | Multiple_Complex |
| TC0100010343.hg.1   | 6.95  | 5.27  | 3.22  | 3.22E-11 | 9.22E-10 | TOMM40L;   | translocase of outer mitochondrial membrane     | Multiple_Complex |
| TC0200010788.hg.1   | 14.71 | 12.67 | 4.09  | 3.23E-11 | 9.26E-10 | ARPC2      | actin related protein 2/3 complex subunit 2     | Multiple_Complex |
| TC0300009471.hg.1   | 9.26  | 7.24  | 4.03  | 3.25E-11 | 9.30E-10 | SKIL       | SKI-like proto-oncogene                         | Multiple_Complex |
| TC1200010397.hg.1   | 8.91  | 10.71 | -3.47 | 3.30E-11 | 9.42E-10 | CPNE8      | copine VIII                                     | Multiple_Complex |
| TC0800007013.hg.1   | 5.71  | 7.85  | -4.39 | 3.33E-11 | 9.49E-10 | CHMP7      | charged multivesicular body protein 7           | Multiple_Complex |
| TC0100006989.hg.1   | 7.59  | 9.11  | -2.87 | 3.36E-11 | 9.56E-10 | DNAJC16    | DnaJ (Hsp40) homolog, subfamily C, member       | Multiple_Complex |
| TC0200013515.hg.1   | 10.24 | 11.46 | -2.33 | 3.39E-11 | 9.63E-10 | STARD7     | STAR-related lipid transfer domain containing   | Multiple_Complex |
| TC0300011485.hg.1   | 12.18 | 13.72 | -2.9  | 3.39E-11 | 9.63E-10 | FOXP1      | forkhead box P1                                 | Multiple_Complex |
| TC2100007318.hg.1   | 5.3   | 6.78  | -2.79 | 3.53E-11 | 1.00E-09 | RRP1B      | ribosomal RNA processing 1B                     | Multiple_Complex |
| TC0200010741.hg.1   | 6.21  | 7.53  | -2.49 | 3.54E-11 | 1.00E-09 | SMARCAL1   | SWI/SNF related, matrix associated, actin dep   | Multiple_Complex |
| TC1300007780.hg.1   | 6.87  | 8.51  | -3.12 | 3.61E-11 | 1.02E-09 | RAP2A      | RAP2A, member of RAS oncogene family            | Coding           |
| TC0900010968.hg.1   | 7.74  | 9.91  | -4.5  | 3.62E-11 | 1.02E-09 | TRIM14     | tripartite motif containing 14                  | Multiple_Complex |
| TC0400009723.hg.1   | 9.76  | 11.34 | -2.99 | 3.67E-11 | 1.03E-09 | CTBP1      | C-terminal binding protein 1                    | Multiple_Complex |
| TC0100014243.hg.1   | 6.09  | 8.16  | -4.2  | 3.67E-11 | 1.03E-09 | NDC1       | NDC1 transmembrane nucleoporin                  | Multiple_Complex |
| TC1100009395.hg.1   | 8.34  | 9.82  | -2.79 | 3.73E-11 | 1.05E-09 | TBRG1      | transforming growth factor beta regulator 1     | Multiple_Complex |
| TC1900011655.hg.1   | 7.52  | 5.75  | 3.41  | 3.89E-11 | 1.09E-09 | PET100     | PET100 homolog                                  | Multiple_Complex |
| TC0500012203.hg.1   | 9.16  | 7.15  | 4.03  | 3.91E-11 | 1.10E-09 | PAIP2; CTB | poly(A) binding protein interacting protein 2 [ | NonCoding        |

|                   |       |       |        |          |          |          |                                                   |                  |
|-------------------|-------|-------|--------|----------|----------|----------|---------------------------------------------------|------------------|
| TC0500010670.hg.1 | 14.45 | 12.36 | 4.26   | 4.00E-11 | 1.12E-09 | EMB      | embigin                                           | Multiple_Complex |
| TC0500008698.hg.1 | 8.15  | 9.79  | -3.13  | 4.09E-11 | 1.14E-09 | JADE2    | jade family PHD finger 2                          | Multiple_Complex |
| TC1500008317.hg.1 | 7.66  | 9.44  | -3.44  | 4.12E-11 | 1.15E-09 | CRTC3    | CREB regulated transcription coactivator 3        | Multiple_Complex |
| TC0200016607.hg.1 | 10.8  | 8.86  | 3.82   | 4.26E-11 | 1.19E-09 | UBE2F    | ubiquitin-conjugating enzyme E2F (putative)       | Multiple_Complex |
| TC0100017079.hg.1 | 6.6   | 8.38  | -3.42  | 4.30E-11 | 1.20E-09 | SLC41A1  | solute carrier family 41 (magnesium transport     | Multiple_Complex |
| TC0100007760.hg.1 | 6.19  | 7.62  | -2.7   | 4.45E-11 | 1.24E-09 | ZMYM1    | zinc finger, MYM-type 1                           | Multiple_Complex |
| TC0400012213.hg.1 | 7.16  | 9.06  | -3.73  | 4.46E-11 | 1.24E-09 | CTSO     | cathepsin O                                       | Coding           |
| TC1100009485.hg.1 | 12.27 | 13.86 | -3.01  | 4.48E-11 | 1.25E-09 | FLI1     | Fli-1 proto-oncogene, ETS transcription factor    | Multiple_Complex |
| TC2200008588.hg.1 | 6.31  | 8.33  | -4.06  | 4.52E-11 | 1.25E-09 | APOL3    | apolipoprotein L, 3                               | Multiple_Complex |
| TC0900012212.hg.1 | 8.9   | 6.78  | 4.34   | 4.54E-11 | 1.26E-09 | PLIN2    | perilipin 2                                       | Multiple_Complex |
| TC0600013757.hg.1 | 17.97 | 14.29 | 12.8   | 4.57E-11 | 1.27E-09 | SOD2     | superoxide dismutase 2, mitochondrial             | Multiple_Complex |
| TC0500011157.hg.1 | 4.1   | 6.42  | -4.96  | 4.59E-11 | 1.27E-09 | GCNT4    | glucosaminyl (N-acetyl) transferase 4, core 2     | Coding           |
| TC0800011713.hg.1 | 7.9   | 9.41  | -2.84  | 4.64E-11 | 1.28E-09 | MTSS1    | metastasis suppressor 1                           | Multiple_Complex |
| TC0200015194.hg.1 | 7.8   | 5.36  | 5.39   | 4.67E-11 | 1.29E-09 | TFPI     | tissue factor pathway inhibitor (lipoprotein-as   | Multiple_Complex |
| TC0400007839.hg.1 | 14.85 | 10.91 | 15.35  | 4.73E-11 | 1.30E-09 | PF4V1    | platelet factor 4 variant 1                       | Coding           |
| TC0700008747.hg.1 | 14.38 | 12.43 | 3.86   | 4.79E-11 | 1.32E-09 | HBP1     | HMG-box transcription factor 1                    | Multiple_Complex |
| TC1700008180.hg.1 | 8.59  | 9.91  | -2.5   | 4.82E-11 | 1.32E-09 | UBE2Z    | ubiquitin-conjugating enzyme E2Z                  | Multiple_Complex |
| TC0100011400.hg.1 | 7.33  | 5.53  | 3.5    | 4.83E-11 | 1.32E-09 | PFKFB2   | 6-phosphofructo-2-kinase/fructose-2,6-bipho       | Multiple_Complex |
| TC0300010274.hg.1 | 5.69  | 7.45  | -3.39  | 4.95E-11 | 1.36E-09 | TAMM41   | TAM41 mitochondrial translocator assembly a       | Multiple_Complex |
| TC0700007409.hg.1 | 8.49  | 10.57 | -4.22  | 4.97E-11 | 1.36E-09 | CCM2     | cerebral cavernous malformation 2                 | Multiple_Complex |
| TC0300012435.hg.1 | 5.5   | 7.05  | -2.94  | 5.00E-11 | 1.37E-09 | ASTE1    | asteroid homolog 1 (Drosophila)                   | Multiple_Complex |
| TC0200013298.hg.1 | 7.55  | 9.56  | -4.03  | 5.02E-11 | 1.37E-09 | ST3GAL5  | ST3 beta-galactoside alpha-2,3-sialyltransfera    | Multiple_Complex |
| TC0600014097.hg.1 | 6.5   | 8.05  | -2.92  | 5.03E-11 | 1.37E-09 | MRPS18B  | mitochondrial ribosomal protein S18B              | Multiple_Complex |
| TC0600011517.hg.1 | 9.28  | 13.44 | -17.84 | 5.19E-11 | 1.41E-09 | HLA-DPA1 | major histocompatibility complex, class II, DP    | Multiple_Complex |
| TC0900011626.hg.1 | 8.53  | 10.38 | -3.6   | 5.22E-11 | 1.42E-09 | CIZ1     | CDKN1A interacting zinc finger protein 1          | Multiple_Complex |
| TC1700008194.hg.1 | 4.33  | 5.69  | -2.56  | 5.25E-11 | 1.43E-09 | ABI3     | ABI family, member 3                              | Multiple_Complex |
| TC0600012777.hg.1 | 11.97 | 10.08 | 3.72   | 5.46E-11 | 1.48E-09 | SNX3     | sorting nexin 3                                   | Multiple_Complex |
| TC0500009131.hg.1 | 8.74  | 9.99  | -2.37  | 5.52E-11 | 1.49E-09 | G3BP1    | GTPase activating protein (SH3 domain) bindi      | Multiple_Complex |
| TC1100009666.hg.1 | 8.07  | 9.31  | -2.36  | 5.53E-11 | 1.49E-09 | SIGIRR   | single immunoglobulin and toll-interleukin 1 r    | Multiple_Complex |
| TC0200015739.hg.1 | 6.47  | 8.17  | -3.23  | 5.55E-11 | 1.50E-09 | ZNF142   | zinc finger protein 142                           | Multiple_Complex |
| TC1500010041.hg.1 | 6.8   | 8.32  | -2.87  | 5.55E-11 | 1.50E-09 | EDC3     | enhancer of mRNA decapping 3                      | Multiple_Complex |
| TC1700011033.hg.1 | 8.83  | 13.09 | -19.22 | 5.60E-11 | 1.51E-09 | PHOSPHO1 | phosphatase, orphan 1                             | Coding           |
| TC1400010759.hg.1 | 7.81  | 5.63  | 4.55   | 5.61E-11 | 1.51E-09 | ATP6V1D  | ATPase, H+ transporting, lysosomal 34kDa, V1      | NonCoding        |
| TC1300006699.hg.1 | 9.78  | 7.89  | 3.71   | 5.72E-11 | 1.54E-09 | ATP5E2   | ATP synthase, H+ transporting, mitochondrial      | Multiple_Complex |
| TC1900008329.hg.1 | 14.75 | 12.26 | 5.59   | 5.77E-11 | 1.55E-09 | VASP     | vasodilator-stimulated phosphoprotein             | Multiple_Complex |
| TC0800008546.hg.1 | 9.24  | 6.9   | 5.04   | 5.79E-11 | 1.55E-09 | ENY2     | enhancer of yellow 2 homolog (Drosophila)         | Multiple_Complex |
| TC1700010459.hg.1 | 7.92  | 5.79  | 4.38   | 5.80E-11 | 1.55E-09 | CCL3     | chemokine (C-C motif) ligand 3                    | Multiple_Complex |
| TC1200006788.hg.1 | 9.43  | 13.42 | -15.88 | 5.85E-11 | 1.56E-09 | KLRD1    | killer cell lectin-like receptor subfamily D, mer | Multiple_Complex |
| TC0700007831.hg.1 | 7.15  | 4.73  | 5.35   | 6.03E-11 | 1.61E-09 | TPST1    | tyrosylprotein sulfotransferase 1                 | Multiple_Complex |
| TC0200016319.hg.1 | 7.34  | 8.62  | -2.42  | 6.05E-11 | 1.61E-09 | ANKMY1   | ankyrin repeat and MYND domain containing         | Multiple_Complex |
| TC0X00011301.hg.1 | 6.29  | 4.7   | 3.01   | 6.07E-11 | 1.62E-09 | MSN      | moesin                                            | NonCoding        |
| TC1700012387.hg.1 | 7.33  | 9.84  | -5.68  | 6.10E-11 | 1.62E-09 | SLFN12L  | schlafen family member 12-like                    | Multiple_Complex |
| TC0300007256.hg.1 | 10.04 | 12.24 | -4.6   | 6.14E-11 | 1.63E-09 | CCR2     | chemokine (C-C motif) receptor 2                  | Multiple_Complex |
| TC0900011393.hg.1 | 6.71  | 8.78  | -4.21  | 6.19E-11 | 1.64E-09 | TRAF1    | TNF receptor-associated factor 1                  | Multiple_Complex |
| TC0300009126.hg.1 | 11.05 | 9.26  | 3.47   | 6.42E-11 | 1.70E-09 | GYG1     | glycogenin 1                                      | Multiple_Complex |
| TC2000006957.hg.1 | 7.67  | 6.22  | 2.72   | 6.48E-11 | 1.72E-09 | GZF1     | GDNF-inducible zinc finger protein 1              | Multiple_Complex |
| TC0300009179.hg.1 | 5.97  | 3.95  | 4.07   | 6.57E-11 | 1.74E-09 | MED12L   | mediator complex subunit 12 like                  | Multiple_Complex |
| TC1900006520.hg.1 | 6.24  | 9.1   | -7.26  | 6.74E-11 | 1.78E-09 | ATP5D    | ATP synthase, H+ transporting, mitochondrial      | Multiple_Complex |
| TC0100008132.hg.1 | 6.65  | 8.49  | -3.56  | 6.74E-11 | 1.78E-09 | TMEM69   | transmembrane protein 69                          | Multiple_Complex |
| TC0900011021.hg.1 | 5.78  | 7.33  | -2.91  | 6.91E-11 | 1.82E-09 | TEX10    | testis expressed 10                               | Multiple_Complex |
| TC0400010615.hg.1 | 7.52  | 9.8   | -4.86  | 7.04E-11 | 1.85E-09 | TXK      | TXK tyrosine kinase                               | Multiple_Complex |
| TC0100014226.hg.1 | 10.05 | 11.57 | -2.86  | 7.26E-11 | 1.91E-09 | C1orf123 | chromosome 1 open reading frame 123               | Multiple_Complex |
| TC1600007262.hg.1 | 8.99  | 10.31 | -2.5   | 7.40E-11 | 1.94E-09 | TNRC6A   | trinucleotide repeat containing 6A                | Multiple_Complex |
| TC0100008641.hg.1 | 11.42 | 9.63  | 3.47   | 7.42E-11 | 1.95E-09 | MIER1    | mesoderm induction early response 1, transcr      | Multiple_Complex |
| TC0500012519.hg.1 | 13.23 | 8.78  | 21.86  | 7.45E-11 | 1.95E-09 | SPARC    | secreted protein, acidic, cysteine-rich (osteoni  | Multiple_Complex |
| TC1700012269.hg.1 | 6.33  | 8.21  | -3.68  | 7.59E-11 | 1.99E-09 | MGC57346 | Homo sapiens MGC57346-CRHR1 readthrough           | Multiple_Complex |
| TC0100015017.hg.1 | 9.65  | 6.12  | 11.57  | 7.75E-11 | 2.02E-09 | RPL7     | ribosomal protein L7                              | Multiple_Complex |
| TC0400011012.hg.1 | 14.57 | 10.05 | 22.94  | 7.78E-11 | 2.03E-09 | PF4      | platelet factor 4                                 | Coding           |
| TC0100008383.hg.1 | 7.96  | 9.38  | -2.67  | 7.79E-11 | 2.03E-09 | MRPL37   | mitochondrial ribosomal protein L37               | Multiple_Complex |
| TC1700009982.hg.1 | 12.45 | 11.21 | 2.37   | 7.87E-11 | 2.05E-09 | USP32P2  | ubiquitin specific peptidase 32 pseudogene 2      | Multiple_Complex |
| TC0600008622.hg.1 | 10.54 | 6.95  | 12.03  | 7.95E-11 | 2.07E-09 | SH3BGR2  | SH3 domain binding glutamate-rich protein lik     | Multiple_Complex |
| TC1400008908.hg.1 | 10.83 | 8.72  | 4.32   | 8.09E-11 | 2.10E-09 | EAPP     | E2F-associated phosphoprotein                     | Multiple_Complex |
| TC0500008814.hg.1 | 13.86 | 12.14 | 3.29   | 8.14E-11 | 2.11E-09 | PAIP2    | poly(A) binding protein interacting protein 2     | Multiple_Complex |
| TC1100010222.hg.1 | 6.28  | 4.04  | 4.71   | 8.17E-11 | 2.12E-09 | RPL36A   | ribosomal protein L36a                            | Multiple_Complex |
| TC0300010722.hg.1 | 10.15 | 8.24  | 3.75   | 8.20E-11 | 2.12E-09 | LRRFIP2  | leucine rich repeat (in FLII) interacting protein | Multiple_Complex |
| TC0900012225.hg.1 | 12.26 | 13.87 | -3.04  | 8.28E-11 | 2.14E-09 | RNF38    | ring finger protein 38                            | Multiple_Complex |
| TC0300014046.hg.1 | 13.47 | 11.13 | 5.05   | 8.43E-11 | 2.18E-09 | CNBP     | CCHC-type zinc finger, nucleic acid binding prc   | Multiple_Complex |
| TC0100016145.hg.1 | 7.22  | 8.79  | -2.98  | 8.61E-11 | 2.22E-09 | CD244    | CD244 molecule, natural killer cell receptor 2E   | Multiple_Complex |
| TC1700012271.hg.1 | 5.06  | 6.82  | -3.38  | 8.69E-11 | 2.24E-09 | GOSR2    | golgi SNAP receptor complex member 2              | Multiple_Complex |
| TC1400009732.hg.1 | 7.82  | 9.85  | -4.08  | 8.97E-11 | 2.31E-09 | C14orf1  | chromosome 14 open reading frame 1                | Multiple_Complex |



|                      |       |       |       |          |          |            |                                                  |                  |
|----------------------|-------|-------|-------|----------|----------|------------|--------------------------------------------------|------------------|
| TC1500008984.hg.1    | 14.69 | 12.23 | 5.52  | 8.98E-11 | 2.31E-09 | NOP10      | NOP10 ribonucleoprotein                          | Multiple_Complex |
| TC1000011501.hg.1    | 6.16  | 7.61  | -2.73 | 9.00E-11 | 2.31E-09 | TCTN3      | tectonic family member 3                         | Multiple_Complex |
| TC1400007172.hg.1    | 9.73  | 11.3  | -2.98 | 9.06E-11 | 2.32E-09 | STYX       | serine/threonine/tyrosine interacting protein    | Multiple_Complex |
| TC1700012356.hg.1    | 13.58 | 7.51  | 67.15 | 9.08E-11 | 2.32E-09 | RPL26      | ribosomal protein L26                            | Multiple_Complex |
| TC0400008620.hg.1    | 5.73  | 7.46  | -3.33 | 9.09E-11 | 2.32E-09 | SPATA5     | spermatogenesis associated 5                     | Multiple_Complex |
| TC2200009274.hg.1    | 7.9   | 10.12 | -4.66 | 9.28E-11 | 2.37E-09 | APOBEC3G   | apolipoprotein B mRNA editing enzyme, catalytic  | Multiple_Complex |
| TC1700009713.hg.1    | 8.6   | 6.94  | 3.15  | 9.50E-11 | 2.42E-09 | STX8       | syntaxin 8                                       | Multiple_Complex |
| TC1200007906.hg.1    | 6.72  | 4.72  | 3.99  | 9.67E-11 | 2.46E-09 | XRCC6BP1   | XRCC6 binding protein 1                          | Multiple_Complex |
| TC0400010580.hg.1    | 4.65  | 6.24  | -3    | 9.75E-11 | 2.48E-09 | GNPDA2     | glucosamine-6-phosphate deaminase 2              | Multiple_Complex |
| TC1100013230.hg.1    | 7.61  | 9.47  | -3.62 | 9.83E-11 | 2.50E-09 | BCL9L      | B-cell CLL/lymphoma 9-like                       | Multiple_Complex |
| TC1000008159.hg.1    | 15.44 | 9.67  | 54.43 | 9.94E-11 | 2.52E-09 | RPS24      | ribosomal protein S24                            | Multiple_Complex |
| TC0X00009869.hg.1    | 6.49  | 8.11  | -3.06 | 1.00E-10 | 2.54E-09 | ARHGEF9; 1 | Cdc42 guanine nucleotide exchange factor 9; 1    | Multiple_Complex |
| TC0700009211.hg.1    | 9.34  | 10.63 | -2.45 | 1.02E-10 | 2.59E-09 | EXOC4      | exocyst complex component 4                      | Multiple_Complex |
| TC0X00007716.hg.1    | 7.91  | 10.28 | -5.17 | 1.03E-10 | 2.61E-09 | P2RY10     | purinergic receptor P2Y, G-protein coupled, 10   | Multiple_Complex |
| TC0100006805.hg.1    | 7.04  | 5.15  | 3.72  | 1.03E-10 | 2.61E-09 | RBP7       | retinol binding protein 7, cellular              | Multiple_Complex |
| TC2000007512.hg.1    | 7.55  | 9.64  | -4.27 | 1.04E-10 | 2.62E-09 | PCIF1      | PDX1 C-terminal inhibiting factor 1              | Multiple_Complex |
| TC0800008531.hg.1    | 9.84  | 7.39  | 5.47  | 1.07E-10 | 2.69E-09 | EMC2       | ER membrane protein complex subunit 2            | Multiple_Complex |
| TC0600013272.hg.1    | 11.75 | 9.62  | 4.38  | 1.08E-10 | 2.71E-09 | BCLAF1     | BCL2-associated transcription factor 1           | Multiple_Complex |
| TC0300007324.hg.1    | 7.62  | 5.35  | 4.81  | 1.12E-10 | 2.80E-09 | CAMP       | cathelicidin antimicrobial peptide               | Coding           |
| TC0100014065.hg.1    | 9.33  | 10.98 | -3.13 | 1.12E-10 | 2.82E-09 | EFCAB14    | EF-hand calcium binding domain 14                | Multiple_Complex |
| TC0300007842.hg.1    | 8.22  | 6.77  | 2.73  | 1.16E-10 | 2.90E-09 | EBLN2      | endogenous Bornavirus-like nucleoprotein 2       | Coding           |
| TC0200016752.hg.1    | 5.17  | 7.14  | -3.92 | 1.17E-10 | 2.93E-09 | TTN        | titin                                            | Multiple_Complex |
| TC0200008666.hg.1    | 8.15  | 5.61  | 5.82  | 1.19E-10 | 2.97E-09 | IL1R1      | interleukin 1 receptor, type I                   | Multiple_Complex |
| TC0100006812.hg.1    | 9.23  | 6.8   | 5.37  | 1.19E-10 | 2.98E-09 | KIF1B      | kinesin family member 1B                         | Multiple_Complex |
| TC1900008989.hg.1    | 8.33  | 9.72  | -2.61 | 1.20E-10 | 2.98E-09 | ZNF460     | zinc finger protein 460                          | Multiple_Complex |
| TC0200012095.hg.1    | 8.13  | 10.28 | -4.44 | 1.20E-10 | 3.00E-09 | SUPT7L     | SPT7-like STAGA complex gamma subunit            | Multiple_Complex |
| TC0500013385.hg.1    | 6.6   | 4.71  | 3.71  | 1.23E-10 | 3.07E-09 | SH3TC2     | SH3 domain and tetratricopeptide repeats 2       | Multiple_Complex |
| TC1100009068.hg.1    | 5.24  | 7.67  | -5.4  | 1.25E-10 | 3.10E-09 | NCAM1      | neural cell adhesion molecule 1                  | Multiple_Complex |
| TC1200009829.hg.1    | 15.05 | 10.82 | 18.7  | 1.25E-10 | 3.10E-09 | CLEC4E     | C-type lectin domain family 4, member E          | Multiple_Complex |
| TC1700010551.hg.1    | 13.19 | 7.27  | 60.36 | 1.25E-10 | 3.10E-09 | RPL23; SNC | ribosomal protein L23; small nucleolar RNA, H    | Multiple_Complex |
| TC1400007562.hg.1    | 17.06 | 14.59 | 5.51  | 1.25E-10 | 3.10E-09 | SRSF5      | serine/arginine-rich splicing factor 5           | Multiple_Complex |
| TC0300012216.hg.1    | 7.93  | 9.43  | -2.82 | 1.27E-10 | 3.14E-09 | CCDC14     | coiled-coil domain containing 14                 | Multiple_Complex |
| TC0100008375.hg.1    | 5.25  | 6.71  | -2.75 | 1.27E-10 | 3.14E-09 | TCEANC2; 1 | transcription elongation factor A (SII) N-termin | Multiple_Complex |
| TC0900008660.hg.1    | 10.4  | 6.96  | 10.83 | 1.29E-10 | 3.19E-09 | PTGS1      | prostaglandin-endoperoxide synthase 1 (prost     | Coding           |
| TC0300007083.hg.1    | 9.69  | 7.39  | 4.94  | 1.30E-10 | 3.20E-09 | WDR48      | WD repeat domain 48                              | Multiple_Complex |
| TC1100011157.hg.1    | 11.74 | 10.01 | 3.31  | 1.30E-10 | 3.21E-09 | PPP1R14B   | protein phosphatase 1, regulatory (inhibitor) s  | Multiple_Complex |
| TC1500009446.hg.1    | 6.12  | 7.36  | -2.36 | 1.33E-10 | 3.27E-09 | LEO1       | LEO1 homolog, Paf1/RNA polymerase II comp        | Multiple_Complex |
| TC0600008531.hg.1    | 6.58  | 7.94  | -2.57 | 1.33E-10 | 3.28E-09 | MTO1       | mitochondrial tRNA translation optimization 1    | Multiple_Complex |
| TC1000007866.hg.1    | 8.23  | 9.74  | -2.85 | 1.35E-10 | 3.31E-09 | CCAR1; SNC | cell division cycle and apoptosis regulator 1; s | Multiple_Complex |
| TC1000008046.hg.1    | 6.46  | 7.73  | -2.42 | 1.41E-10 | 3.45E-09 | FUT11      | fucosyltransferase 11 (alpha (1,3) fucosyltrans  | Multiple_Complex |
| TC0100007676.hg.1    | 8.13  | 11.41 | -9.68 | 1.41E-10 | 3.45E-09 | LCK        | LCK proto-oncogene, Src family tyrosine kinas    | Multiple_Complex |
| TC1700008095.hg.1    | 10.75 | 12.91 | -4.48 | 1.42E-10 | 3.47E-09 | LRRC37A    | leucine rich repeat containing 37A               | Multiple_Complex |
| TC1600011556.hg.1    | 6.08  | 7.98  | -3.73 | 1.46E-10 | 3.58E-09 | PDF; COG8  | peptide deformylase (mitochondrial); compor      | Multiple_Complex |
| TC0600009279.hg.1    | 6.49  | 8.16  | -3.18 | 1.47E-10 | 3.60E-09 | ASF1A      | anti-silencing function 1A histone chaperone     | Multiple_Complex |
| TC0400011695.hg.1    | 9.35  | 10.62 | -2.42 | 1.48E-10 | 3.61E-09 | SEC24D     | SEC24 homolog D, COPII coat complex compo        | Multiple_Complex |
| TC0700013460.hg.1    | 7.33  | 8.89  | -2.93 | 1.53E-10 | 3.73E-09 | METTL2B    | methyltransferase like 2B                        | Multiple_Complex |
| TC1300009597.hg.1    | 7.33  | 10.02 | -6.46 | 1.56E-10 | 3.79E-09 | GPR18      | G protein-coupled receptor 18                    | Coding           |
| TC1200010944.hg.1    | 4.95  | 6.3   | -2.55 | 1.58E-10 | 3.85E-09 | ZBTB39     | zinc finger and BTB domain containing 39         | Coding           |
| TC0X00009441.hg.1    | 9.41  | 10.95 | -2.92 | 1.59E-10 | 3.87E-09 | MED14      | mediator complex subunit 14                      | Multiple_Complex |
| TC0200009911.hg.1    | 9.91  | 8.17  | 3.34  | 1.60E-10 | 3.87E-09 | PPIG       | peptidylprolyl isomerase G (cyclophilin G)       | Multiple_Complex |
| TC0200013112.hg.1    | 10.35 | 11.69 | -2.53 | 1.61E-10 | 3.90E-09 | AUP1       | ancient ubiquitous protein 1                     | Multiple_Complex |
| TC1100010089.hg.1    | 12.95 | 10.65 | 4.92  | 1.64E-10 | 3.96E-09 | RNF141     | ring finger protein 141                          | Multiple_Complex |
| TC1700008531.hg.1    | 6.9   | 8.23  | -2.52 | 1.64E-10 | 3.96E-09 | METTL2A    | methyltransferase like 2A                        | Multiple_Complex |
| TC1900011915.hg.1    | 7.7   | 9.13  | -2.69 | 1.64E-10 | 3.96E-09 | ZNF737     | zinc finger protein 737                          | Multiple_Complex |
| TC1500007554.hg.1    | 7.25  | 9.02  | -3.4  | 1.69E-10 | 4.06E-09 | ZNF609     | zinc finger protein 609                          | Multiple_Complex |
| TC1800008331.hg.1    | 9.5   | 12.2  | -6.5  | 1.69E-10 | 4.06E-09 | SS18       | synovial sarcoma translocation, chromosome       | Multiple_Complex |
| TC1700008563.hg.1    | 7.49  | 9.36  | -3.65 | 1.69E-10 | 4.07E-09 | DCAF7      | DDB1 and CUL4 associated factor 7                | Multiple_Complex |
| TC1600007887.hg.1    | 11.72 | 13.13 | -2.65 | 1.70E-10 | 4.08E-09 | RBL2       | retinoblastoma-like 2                            | Multiple_Complex |
| TC1200012763.hg.1    | 6.7   | 8.38  | -3.21 | 1.71E-10 | 4.10E-09 | TAS2R30; T | taste receptor, type 2, member 30; taste recej   | Multiple_Complex |
| TC0700007067.hg.1    | 7.03  | 5.14  | 3.7   | 1.72E-10 | 4.13E-09 | MTURN      | maturin, neural progenitor differentiation reg   | Multiple_Complex |
| TC1700011903.hg.1    | 6.67  | 4.75  | 3.78  | 1.74E-10 | 4.17E-09 | SOCS3      | suppressor of cytokine signaling 3               | Coding           |
| TSUnmapped00000256.h | 5.59  | 7.1   | -2.84 | 1.76E-10 | 4.20E-09 | DYRK1B     | dual specificity tyrosine-(Y)-phosphorylation r  | Coding           |
| TC1700007602.hg.1    | 8.56  | 10.39 | -3.53 | 1.79E-10 | 4.27E-09 | TAF15      | TATA box binding protein associated factor 15    | Multiple_Complex |
| TC0800010667.hg.1    | 9.59  | 11.36 | -3.4  | 1.82E-10 | 4.34E-09 | PDE7A      | phosphodiesterase 7A                             | Multiple_Complex |
| TC0600007108.hg.1    | 11.37 | 8.81  | 5.92  | 1.82E-10 | 4.34E-09 | RNF144B    | ring finger protein 144B                         | Multiple_Complex |
| TC1900011937.hg.1    | 4.98  | 6.17  | -2.28 | 1.85E-10 | 4.41E-09 | ZNF607     | zinc finger protein 607                          | Multiple_Complex |
| TC0500008845.hg.1    | 9.68  | 11.26 | -2.99 | 1.85E-10 | 4.41E-09 | PURA       | purine-rich element binding protein A            | Multiple_Complex |
| TC0300013962.hg.1    | 9.75  | 7.75  | 4.01  | 1.87E-10 | 4.45E-09 | ANO10      | anoctamin 10                                     | Multiple_Complex |
| TC0600007402.hg.1    | 7.03  | 8.81  | -3.43 | 1.91E-10 | 4.54E-09 | ZKSCAN8    | zinc finger with KRAB and SCAN domains 8         | Multiple_Complex |
| TC1000008054.hg.1    | 8.86  | 5.97  | 7.44  | 1.96E-10 | 4.66E-09 | PLAU       | plasminogen activator, urokinase                 | Multiple_Complex |

|                         |       |       |        |          |          |                  |                                                                     |                  |
|-------------------------|-------|-------|--------|----------|----------|------------------|---------------------------------------------------------------------|------------------|
| TC0200008632.hg.1       | 12.54 | 8.91  | 12.41  | 1.99E-10 | 4.71E-09 | RPL31            | ribosomal protein L31                                               | Multiple_Complex |
| TC0100013432.hg.1       | 10.39 | 12.43 | -4.13  | 1.99E-10 | 4.72E-09 | WASF2            | WAS protein family, member 2                                        | Multiple_Complex |
| TC1800009223.hg.1       | 10.27 | 8.75  | 2.86   | 2.00E-10 | 4.73E-09 | RNF138           | ring finger protein 138, E3 ubiquitin protein ligase                | Multiple_Complex |
| TC1600009524.hg.1       | 8.74  | 10.29 | -2.92  | 2.01E-10 | 4.75E-09 | NPIPA5           | nuclear pore complex interacting protein family 5                   | Coding           |
| TC0500010493.hg.1       | 5.95  | 7.7   | -3.36  | 2.03E-10 | 4.79E-09 | LMBRD2           | LMBR1 domain containing 2                                           | Multiple_Complex |
| TC1200012717.hg.1       | 9.29  | 10.44 | -2.21  | 2.03E-10 | 4.79E-09 | GATC             | glutamyl-tRNA(Gln) amidotransferase, subunit 1                      | Multiple_Complex |
| TC0400012757.hg.1       | 10.19 | 11.97 | -3.43  | 2.05E-10 | 4.83E-09 | RNF4             | ring finger protein 4                                               | Multiple_Complex |
| TC0800007978.hg.1       | 9.69  | 7.37  | 4.99   | 2.11E-10 | 4.95E-09 | LY96             | lymphocyte antigen 96                                               | Coding           |
| TC2000009874.hg.1       | 11.63 | 14.72 | -8.5   | 2.12E-10 | 4.98E-09 | PSMF1            | proteasome inhibitor subunit 1                                      | Multiple_Complex |
| TC1000010737.hg.1       | 6.72  | 4.31  | 5.3    | 2.13E-10 | 4.99E-09 | RHOBTB1          | Rho-related BTB domain containing 1                                 | Multiple_Complex |
| TC1700006719.hg.1       | 17.01 | 18.85 | -3.57  | 2.13E-10 | 5.00E-09 | RNASEK; C11orf92 | ribonuclease, RNase K; chromosome 17 open reading frame 92          | Multiple_Complex |
| TC2000006518.hg.1       | 8.5   | 9.91  | -2.65  | 2.15E-10 | 5.04E-09 | NOP56; SNORD56   | NOP56 ribonucleoprotein; small nucleolar ribonucleoprotein          | Multiple_Complex |
| TC0900006970.hg.1       | 8.59  | 10.08 | -2.8   | 2.16E-10 | 5.06E-09 | NFX1             | nuclear transcription factor, X-box binding 1                       | Multiple_Complex |
| TC2200008489.hg.1       | 8.23  | 9.93  | -3.24  | 2.21E-10 | 5.16E-09 | PRR14L           | proline rich 14-like                                                | Multiple_Complex |
| TC1200011400.hg.1       | 10.82 | 8.5   | 5.01   | 2.22E-10 | 5.18E-09 | CCDC59           | coiled-coil domain containing 59                                    | Multiple_Complex |
| TSUnmapped00000222.hg.1 | 5.61  | 7.55  | -3.86  | 2.25E-10 | 5.25E-09 | ZNF780A          | zinc finger protein 780A                                            | Coding           |
| TC0300011081.hg.1       | 8.1   | 9.58  | -2.78  | 2.25E-10 | 5.25E-09 | UBA7; MIR6808    | ubiquitin-like modifier activating enzyme 7; microRNA 6808          | Multiple_Complex |
| TC0300007100.hg.1       | 7.84  | 9.91  | -4.2   | 2.26E-10 | 5.26E-09 | SLC25A38         | solute carrier family 25, member 38                                 | Multiple_Complex |
| TC0100016625.hg.1       | 16.95 | 14.91 | 4.12   | 2.26E-10 | 5.26E-09 | GLUL             | glutamate-ammonia ligase                                            | Multiple_Complex |
| TC1200012267.hg.1       | 10.22 | 8.65  | 2.98   | 2.32E-10 | 5.38E-09 | SBNO1; MIMC1     | strawberry notch homolog 1 (Drosophila); microRNA 1                 | Multiple_Complex |
| TC0800008916.hg.1       | 9.72  | 10.88 | -2.24  | 2.34E-10 | 5.42E-09 | EFR3A            | EFR3 homolog A                                                      | Multiple_Complex |
| TC0600014074.hg.1       | 10.5  | 8.95  | 2.94   | 2.34E-10 | 5.42E-09 | HIVEP1           | human immunodeficiency virus type 1 enhancer binding protein 1      | Multiple_Complex |
| TC1500007202.hg.1       | 10.34 | 9.05  | 2.45   | 2.39E-10 | 5.54E-09 | USP8             | ubiquitin specific peptidase 8                                      | Multiple_Complex |
| TC1200009796.hg.1       | 19.16 | 16.62 | 5.83   | 2.40E-10 | 5.54E-09 | SLC2A14          | solute carrier family 2 (facilitated glucose transporter) member 14 | Multiple_Complex |
| TC1700012283.hg.1       | 10.26 | 12.15 | -3.72  | 2.43E-10 | 5.60E-09 | LUC7L3           | LUC7-like 3 pre-mRNA splicing factor                                | Multiple_Complex |
| TC0500012163.hg.1       | 3.9   | 5.18  | -2.42  | 2.43E-10 | 5.62E-09 | CDC23            | cell division cycle 23                                              | Multiple_Complex |
| TC1900007181.hg.1       | 8.39  | 10.45 | -4.18  | 2.45E-10 | 5.63E-09 | TECR; MIR6809    | trans-2,3-enoyl-CoA reductase; microRNA 6809                        | Multiple_Complex |
| TC0300013795.hg.1       | 6.96  | 8.44  | -2.79  | 2.47E-10 | 5.69E-09 | OXNAD1           | oxidoreductase NAD-binding domain containing 1                      | Multiple_Complex |
| TC0100010335.hg.1       | 7.03  | 8.96  | -3.81  | 2.54E-10 | 5.83E-09 | USP21            | ubiquitin specific peptidase 21                                     | Multiple_Complex |
| TC0400009088.hg.1       | 9.8   | 6.66  | 8.83   | 2.54E-10 | 5.83E-09 | GUCY1B3          | guanylate cyclase 1, soluble, beta 3                                | Multiple_Complex |
| TC0500013342.hg.1       | 9.61  | 11.83 | -4.66  | 2.54E-10 | 5.83E-09 | ERAP1            | endoplasmic reticulum aminopeptidase 1                              | Multiple_Complex |
| TC0100010341.hg.1       | 16.23 | 13.86 | 5.17   | 2.56E-10 | 5.86E-09 | FCER1G           | Fc fragment of IgE, high affinity I, receptor for                   | Multiple_Complex |
| TC0X00009255.hg.1       | 10.75 | 7.04  | 13.02  | 2.56E-10 | 5.87E-09 | RPL9P7           | ribosomal protein L9 pseudogene 7                                   | Multiple_Complex |
| TC1600007992.hg.1       | 8.21  | 9.47  | -2.39  | 2.58E-10 | 5.90E-09 | ARL2BP           | ADP-ribosylation factor like GTPase 2 binding protein               | Multiple_Complex |
| TC0800011625.hg.1       | 8     | 9.22  | -2.33  | 2.59E-10 | 5.91E-09 | TAF2             | TAF2 RNA polymerase II, TATA box binding protein                    | Multiple_Complex |
| TC0400007853.hg.1       | 5.27  | 3.8   | 2.76   | 2.59E-10 | 5.91E-09 | EREG             | epiregulin                                                          | Multiple_Complex |
| TC0100013651.hg.1       | 11.05 | 7.95  | 8.56   | 2.60E-10 | 5.92E-09 | PHC2; MIR6810    | polyhomeotic homolog 2 (Drosophila); microRNA 6810                  | Multiple_Complex |
| TC1900011934.hg.1       | 8.55  | 10.13 | -2.99  | 2.69E-10 | 6.13E-09 | ZNF585B          | zinc finger protein 585B                                            | Multiple_Complex |
| TC0X00011308.hg.1       | 10.26 | 5.62  | 24.83  | 2.71E-10 | 6.17E-09 | RPL36A           | ribosomal protein L36a                                              | Multiple_Complex |
| TC1100010274.hg.1       | 8.34  | 6.96  | 2.59   | 2.73E-10 | 6.20E-09 | SPTY2D1          | SPT2 chromatin protein domain containing 1                          | Multiple_Complex |
| TC0100007458.hg.1       | 6.92  | 8.36  | -2.71  | 2.73E-10 | 6.20E-09 | DHDDS            | dehydrodichyl diphosphate synthase subunit 1                        | Multiple_Complex |
| TC1100010992.hg.1       | 9.09  | 5.65  | 10.81  | 2.76E-10 | 6.26E-09 | TCN1             | transcobalamin I (vitamin B12 binding protein)                      | Multiple_Complex |
| TC1900009633.hg.1       | 6.22  | 8.46  | -4.74  | 2.78E-10 | 6.29E-09 | S1PR5            | sphingosine-1-phosphate receptor 5                                  | Coding           |
| TC1000010292.hg.1       | 5.75  | 4.47  | 2.44   | 2.80E-10 | 6.33E-09 | PARD3            | par-3 family cell polarity regulator                                | Multiple_Complex |
| TC0200016585.hg.1       | 9.57  | 7.63  | 3.83   | 2.81E-10 | 6.34E-09 | MOB4             | MOB family member 4, phocein                                        | Multiple_Complex |
| TC0800007367.hg.1       | 7.76  | 5.84  | 3.79   | 2.84E-10 | 6.41E-09 | ADAM9            | ADAM metalloproteinase domain 9                                     | Multiple_Complex |
| TC1300009293.hg.1       | 9.16  | 10.83 | -3.2   | 2.84E-10 | 6.41E-09 | MYCBP2           | MYC binding protein 2, E3 ubiquitin protein ligase                  | Multiple_Complex |
| TC1100008673.hg.1       | 4.47  | 6.12  | -3.13  | 2.85E-10 | 6.42E-09 | TMEM135          | transmembrane protein 135                                           | Multiple_Complex |
| TSUnmapped00000311.hg.1 | 5.78  | 7.55  | -3.4   | 2.85E-10 | 6.42E-09 | ZNF780A          | zinc finger protein 780A                                            | Coding           |
| TC1900010673.hg.1       | 5.71  | 6.99  | -2.42  | 2.90E-10 | 6.51E-09 | DYRK1B           | dual specificity tyrosine-(Y)-phosphorylation kinase 1B             | Multiple_Complex |
| TC1700010732.hg.1       | 8.15  | 9.63  | -2.79  | 2.94E-10 | 6.60E-09 | FAM134C          | family with sequence similarity 134, member 1                       | Multiple_Complex |
| TC0500011260.hg.1       | 7.97  | 9.26  | -2.44  | 2.94E-10 | 6.60E-09 | SERINC5          | serine incorporator 5                                               | Multiple_Complex |
| TC1000008193.hg.1       | 9.65  | 7.49  | 4.47   | 2.96E-10 | 6.64E-09 | PP1F             | peptidylprolyl isomerase F                                          | Multiple_Complex |
| TC1800009215.hg.1       | 12.25 | 10.3  | 3.86   | 3.09E-10 | 6.93E-09 | ANKRD12          | ankyrin repeat domain 12                                            | Multiple_Complex |
| TC0100006698.hg.1       | 7.45  | 6.12  | 2.52   | 3.13E-10 | 6.99E-09 | PHF13            | PHD finger protein 13                                               | Multiple_Complex |
| TC0700007285.hg.1       | 10.59 | 12.01 | -2.68  | 3.16E-10 | 7.05E-09 | CDK13            | cyclin-dependent kinase 13                                          | Multiple_Complex |
| TC0800007439.hg.1       | 8.33  | 6.74  | 3.01   | 3.31E-10 | 7.39E-09 | POLB             | polymerase (DNA directed), beta                                     | Multiple_Complex |
| TC0200014160.hg.1       | 7.13  | 9.37  | -4.73  | 3.34E-10 | 7.45E-09 | BIN1             | bridging integrator 1                                               | Multiple_Complex |
| TC0200006757.hg.1       | 5.82  | 8.02  | -4.58  | 3.36E-10 | 7.48E-09 | TRIB2            | tribbles pseudokinase 2                                             | Multiple_Complex |
| TC0400012941.hg.1       | 8.05  | 6.43  | 3.08   | 3.41E-10 | 7.58E-09 | THAP9-AS1        | THAP9 antisense RNA 1                                               | NonCoding        |
| TC0600013160.hg.1       | 8.17  | 11.13 | -7.76  | 3.41E-10 | 7.58E-09 | SAMD3            | sterile alpha motif domain containing 3                             | Multiple_Complex |
| TC1500010755.hg.1       | 6.29  | 4.68  | 3.05   | 3.42E-10 | 7.60E-09 | ANKDD1A          | ankyrin repeat and death domain containing 1                        | Multiple_Complex |
| TC0500008558.hg.1       | 9.07  | 10.85 | -3.43  | 3.47E-10 | 7.71E-09 | PRRC1            | proline-rich coiled-coil 1                                          | Multiple_Complex |
| TC1500010869.hg.1       | 10.8  | 8.44  | 5.13   | 3.63E-10 | 8.04E-09 | CCPG1; MIMC2     | cell cycle progression 1; microRNA 628                              | Multiple_Complex |
| TC1600010792.hg.1       | 4.73  | 6.66  | -3.79  | 3.71E-10 | 8.22E-09 | PHLPP2           | PH domain and leucine rich repeat protein phosphatase 2             | Multiple_Complex |
| TC0100006729.hg.1       | 10.68 | 8.4   | 4.85   | 3.78E-10 | 8.36E-09 | PARK7            | parkinson protein 7                                                 | Multiple_Complex |
| TC0700013538.hg.1       | 9.86  | 13.25 | -10.49 | 3.86E-10 | 8.52E-09 | TRGJ1; TRGJ2     | T cell receptor gamma joining 1; T cell receptor gamma joining 2    | Multiple_Complex |
| TC1100010346.hg.1       | 7.34  | 8.61  | -2.41  | 3.87E-10 | 8.54E-09 | FANCF            | Fanconi anemia complementation group F                              | Coding           |
| TC0500011408.hg.1       | 7.45  | 8.88  | -2.71  | 3.88E-10 | 8.56E-09 | TMEM161E         | transmembrane protein 161B                                          | Multiple_Complex |
| TC0500010169.hg.1       | 6.82  | 8.91  | -4.24  | 3.89E-10 | 8.56E-09 | ANKH             | ANKH inorganic pyrophosphate transport regulator                    | Multiple_Complex |

|                   |       |       |        |          |          |          |                                                |                  |
|-------------------|-------|-------|--------|----------|----------|----------|------------------------------------------------|------------------|
| TC0700008517.hg.1 | 7.99  | 9.31  | -2.5   | 3.90E-10 | 8.57E-09 | ZKSCAN1  | zinc finger with KRAB and SCAN domains 1       | Multiple_Complex |
| TC1500010080.hg.1 | 5.78  | 7.73  | -3.88  | 3.92E-10 | 8.60E-09 | IMP3     | IMP3, U3 small nucleolar ribonucleoprotein     | Multiple_Complex |
| TC2000009053.hg.1 | 6.75  | 9.09  | -5.05  | 3.93E-10 | 8.63E-09 | TTI1     | TELO2 interacting protein 1                    | Multiple_Complex |
| TC0300007312.hg.1 | 6.62  | 8.28  | -3.17  | 3.94E-10 | 8.65E-09 | DHX30    | DEAH (Asp-Glu-Ala-His) box helicase 30         | Multiple_Complex |
| TC0200012713.hg.1 | 7.18  | 9.48  | -4.91  | 3.95E-10 | 8.66E-09 | BCL11A   | B-cell CLL/lymphoma 11A (zinc finger protein)  | Multiple_Complex |
| TC1900006578.hg.1 | 9.7   | 11.26 | -2.94  | 3.97E-10 | 8.69E-09 | SF3A2    | splicing factor 3a subunit 2                   | Multiple_Complex |
| TC0300011273.hg.1 | 12.19 | 10.76 | 2.69   | 4.05E-10 | 8.85E-09 | ARF4     | ADP-ribosylation factor 4                      | Multiple_Complex |
| TC1800008219.hg.1 | 10.75 | 8.39  | 5.12   | 4.10E-10 | 8.96E-09 | ROCK1    | Rho-associated, coiled-coil containing protein | Multiple_Complex |
| TC0700012734.hg.1 | 5.46  | 7.59  | -4.38  | 4.31E-10 | 9.41E-09 | CREB3L2  | cAMP responsive element binding protein 3-li   | Multiple_Complex |
| TC1100007287.hg.1 | 8.51  | 9.56  | -2.07  | 4.35E-10 | 9.49E-09 | TRIM44   | tripartite motif containing 44                 | Multiple_Complex |
| TC0200014995.hg.1 | 16.04 | 17.51 | -2.77  | 4.37E-10 | 9.52E-09 | WIPF1    | WAS/WASL interacting protein family, membe     | Multiple_Complex |
| TC0300013920.hg.1 | 4.96  | 5.99  | -2.04  | 4.41E-10 | 9.59E-09 | NRROS    | negative regulator of reactive oxygen species  | Multiple_Complex |
| TC0500013109.hg.1 | 7.42  | 8.67  | -2.36  | 4.42E-10 | 9.61E-09 | ZFP62    | ZFP62 zinc finger protein                      | Multiple_Complex |
| TC0200012405.hg.1 | 6.72  | 8.82  | -4.29  | 4.45E-10 | 9.66E-09 | THADA    | thyroid adenoma associated                     | Multiple_Complex |
| TC0400011815.hg.1 | 7.38  | 9.31  | -3.81  | 4.49E-10 | 9.75E-09 | MFSD8    | major facilitator superfamily domain containi  | Multiple_Complex |
| TC1000007337.hg.1 | 8.07  | 9.41  | -2.54  | 4.51E-10 | 9.78E-09 | ZNF37A   | zinc finger protein 37A                        | Multiple_Complex |
| TC1700009640.hg.1 | 5.63  | 7.07  | -2.73  | 4.54E-10 | 9.81E-09 | ZBTB4    | zinc finger and BTB domain containing 4        | Multiple_Complex |
| TC1600008126.hg.1 | 9.18  | 6.81  | 5.16   | 4.54E-10 | 9.81E-09 | CMTM2    | CKLF-like MARVEL transmembrane domain co       | Multiple_Complex |
| TC0900010995.hg.1 | 6.39  | 8.06  | -3.17  | 4.60E-10 | 9.92E-09 | ALG2     | ALG2, alpha-1,3/1,6-mannosyltransferase        | Multiple_Complex |
| TC1500007986.hg.1 | 12.21 | 10.6  | 3.05   | 4.60E-10 | 9.92E-09 | MORF4L1  | mortality factor 4 like 1                      | Multiple_Complex |
| TC0100012687.hg.1 | 7.09  | 8.77  | -3.2   | 4.64E-10 | 1.00E-08 | NOL9     | nucleolar protein 9                            | Multiple_Complex |
| TC0100011458.hg.1 | 9.93  | 11.6  | -3.17  | 4.65E-10 | 1.00E-08 | TRAF3IP3 | TRAF3 interacting protein 3                    | Multiple_Complex |
| TC0400012902.hg.1 | 6.53  | 10.34 | -14.09 | 4.66E-10 | 1.00E-08 | FGFBP2   | fibroblast growth factor binding protein 2     | Coding           |
| TC0X00009124.hg.1 | 9.04  | 7.27  | 3.41   | 4.67E-10 | 1.00E-08 | PIGA     | phosphatidylinositol glycan anchor biosynthes  | Multiple_Complex |
| TC0200016648.hg.1 | 13.21 | 10.98 | 4.69   | 4.79E-10 | 1.03E-08 | CDC42EP3 | CDC42 effector protein (Rho GTPase binding)    | Coding           |
| TC1000008221.hg.1 | 5.37  | 7.08  | -3.27  | 4.79E-10 | 1.03E-08 | TMEM254  | transmembrane protein 254                      | Multiple_Complex |
| TC1600010780.hg.1 | 6.5   | 8.47  | -3.9   | 4.84E-10 | 1.04E-08 | CMTR2    | cap methyltransferase 2                        | Multiple_Complex |
| TC0500008309.hg.1 | 7.01  | 9.18  | -4.48  | 4.88E-10 | 1.05E-08 | CAMK4    | calcium/calmodulin-dependent protein kinase    | Multiple_Complex |
| TC0200006524.hg.1 | 7.39  | 9.01  | -3.06  | 4.92E-10 | 1.05E-08 | TRAPPC12 | trafficking protein particle complex 12        | Multiple_Complex |
| TC0500010635.hg.1 | 8.23  | 6.49  | 3.33   | 5.09E-10 | 1.09E-08 | HMGCS1   | 3-hydroxy-3-methylglutaryl-CoA synthase 1 (s   | Multiple_Complex |
| TC0500010842.hg.1 | 9.9   | 7.33  | 5.95   | 5.14E-10 | 1.10E-08 | PDE4D    | phosphodiesterase 4D, cAMP-specific            | Multiple_Complex |
| TC0300007237.hg.1 | 5.68  | 7.26  | -2.99  | 5.25E-10 | 1.12E-08 | LIMD1    | LIM domains containing 1                       | Multiple_Complex |
| TC0700006836.hg.1 | 11.28 | 6.73  | 23.4   | 5.25E-10 | 1.12E-08 | RPL21    | Homo sapiens ribosomal protein L21, mRNA (r    | Multiple_Complex |
| TC1900010528.hg.1 | 5.16  | 7.12  | -3.9   | 5.25E-10 | 1.12E-08 | ZNF260   | zinc finger protein 260                        | Multiple_Complex |
| TC0200014184.hg.1 | 9.86  | 11.15 | -2.45  | 5.27E-10 | 1.12E-08 | WDR33    | WD repeat domain 33                            | Multiple_Complex |
| TC0600011943.hg.1 | 5.04  | 7.58  | -5.83  | 5.32E-10 | 1.13E-08 | ENPP5    | ectonucleotide pyrophosphatase/phosphodie      | Multiple_Complex |
| TC0M00006437.hg.1 | 18.25 | 19.49 | -2.36  | 5.37E-10 | 1.14E-08 | COX2     | cytochrome c oxidase subunit II                | Multiple_Complex |
| TC0300012426.hg.1 | 6.41  | 7.95  | -2.92  | 5.44E-10 | 1.15E-08 | PIK3R4   | phosphoinositide-3-kinase, regulatory subunit  | Multiple_Complex |
| TC1000011515.hg.1 | 5.17  | 7.04  | -3.66  | 5.51E-10 | 1.17E-08 | BLNK     | B-cell linker                                  | Multiple_Complex |
| TC0300008999.hg.1 | 8.52  | 10.99 | -5.53  | 5.64E-10 | 1.19E-08 | ZBTB38   | zinc finger and BTB domain containing 38       | Multiple_Complex |
| TC0600011162.hg.1 | 4.8   | 6.61  | -3.51  | 5.66E-10 | 1.20E-08 | ZNF322   | zinc finger protein 322                        | Multiple_Complex |
| TC1900010076.hg.1 | 7.91  | 9.14  | -2.35  | 5.73E-10 | 1.21E-08 | ATP13A1  | ATPase type 13A1                               | Multiple_Complex |
| TC1700008135.hg.1 | 6.07  | 7.33  | -2.4   | 5.75E-10 | 1.21E-08 | TBX21    | T-box 21                                       | Multiple_Complex |
| TC0600014111.hg.1 | 5.97  | 8.24  | -4.84  | 5.78E-10 | 1.22E-08 | SYNGAP1  | synaptic Ras GTPase activating protein 1; micr | Multiple_Complex |
| TC1200006787.hg.1 | 11.8  | 9.6   | 4.59   | 5.84E-10 | 1.23E-08 | GABARAPL | GABA(A) receptor-associated protein like 1     | Multiple_Complex |
| TC0100012846.hg.1 | 6.65  | 8.08  | -2.71  | 5.85E-10 | 1.23E-08 | DFFA     | DNA fragmentation factor, 45kDa, alpha polyr   | Multiple_Complex |
| TC1900010502.hg.1 | 8.08  | 6.26  | 3.52   | 5.86E-10 | 1.23E-08 | NFKBID   | nuclear factor of kappa light polypeptide gene | Multiple_Complex |
| TC0100016206.hg.1 | 5.88  | 9.37  | -11.23 | 5.87E-10 | 1.23E-08 | SH2D1B   | SH2 domain containing 1B                       | Multiple_Complex |
| TC1900010391.hg.1 | 7.25  | 8.8   | -2.92  | 5.88E-10 | 1.23E-08 | PEPD     | peptidase D                                    | Multiple_Complex |
| TC0600009228.hg.1 | 6.75  | 8.16  | -2.66  | 5.92E-10 | 1.24E-08 | NT5DC1   | 5-nucleotidase domain containing 1             | Multiple_Complex |
| TC0X00007188.hg.1 | 6.38  | 7.56  | -2.28  | 5.94E-10 | 1.24E-08 | FTSJ1    | FtsJ RNA methyltransferase homolog 1 (E. coli  | Multiple_Complex |
| TC0300011152.hg.1 | 4.6   | 6.08  | -2.79  | 5.98E-10 | 1.25E-08 | DUSP7    | dual specificity phosphatase 7                 | Multiple_Complex |
| TC1000006707.hg.1 | 5.88  | 7.39  | -2.85  | 6.04E-10 | 1.26E-08 | GATA3    | GATA binding protein 3                         | Multiple_Complex |
| TC1000008926.hg.1 | 8.19  | 10    | -3.5   | 6.05E-10 | 1.26E-08 | ACSL5    | acyl-CoA synthetase long-chain family membe    | Multiple_Complex |
| TC0600009808.hg.1 | 10.24 | 8.45  | 3.47   | 6.08E-10 | 1.27E-08 | PCMT1    | protein-L-isoaspartate (D-aspartate) O-methyl  | Multiple_Complex |
| TC0600010375.hg.1 | 5.74  | 6.93  | -2.28  | 6.17E-10 | 1.29E-08 | EXOC2    | exocyst complex component 2                    | Multiple_Complex |
| TC0700012998.hg.1 | 7.89  | 9.32  | -2.7   | 6.23E-10 | 1.30E-08 | ZNF767P  | zinc finger family member 767, pseudogene      | Multiple_Complex |
| TC0900011259.hg.1 | 5.38  | 6.55  | -2.24  | 6.24E-10 | 1.30E-08 | HDHD3    | haloacid dehalogenase-like hydrolase domain    | Multiple_Complex |
| TC1300006675.hg.1 | 13.23 | 7.88  | 40.93  | 6.26E-10 | 1.30E-08 | SNORD102 | small nucleolar RNA, C/D box 102; small nucle  | Multiple_Complex |
| TC0300007606.hg.1 | 5.5   | 6.85  | -2.55  | 6.31E-10 | 1.31E-08 | ABHD6    | abhydrolase domain containing 6                | Multiple_Complex |
| TC1900011720.hg.1 | 6.47  | 5.4   | 2.09   | 6.40E-10 | 1.33E-08 | HKR1     | HKR1, GLI-Kruppel zinc finger family member    | NonCoding        |
| TC1100012012.hg.1 | 7.12  | 5.1   | 4.07   | 6.45E-10 | 1.34E-08 | CWC15    | CWC15 spliceosome-associated protein           | Multiple_Complex |
| TC1900008257.hg.1 | 4.61  | 6.65  | -4.11  | 6.47E-10 | 1.34E-08 | ZNF227   | zinc finger protein 227                        | Multiple_Complex |
| TC2200007626.hg.1 | 9.23  | 10.91 | -3.21  | 6.47E-10 | 1.34E-08 | ATXN10   | ataxin 10                                      | Multiple_Complex |
| TC0800012285.hg.1 | 7.79  | 8.96  | -2.25  | 6.48E-10 | 1.34E-08 | HMBOX1   | homeobox containing 1                          | Multiple_Complex |
| TC0700012427.hg.1 | 9.05  | 10.15 | -2.14  | 6.50E-10 | 1.34E-08 | FAM3C    | family with sequence similarity 3, member C    | Multiple_Complex |
| TC1500010292.hg.1 | 12.25 | 10.62 | 3.1    | 6.51E-10 | 1.34E-08 | SEC11A   | SEC11 homolog A, signal peptidase complex s    | Multiple_Complex |
| TC1700010763.hg.1 | 7.07  | 5.53  | 2.93   | 6.52E-10 | 1.34E-08 | BRC A1   | breast cancer 1, early onset                   | Multiple_Complex |
| TC0200016502.hg.1 | 9.84  | 7.18  | 6.34   | 6.78E-10 | 1.40E-08 | IL18R1   | interleukin 18 receptor 1                      | Multiple_Complex |
| TC0600013206.hg.1 | 6.79  | 8.3   | -2.85  | 6.84E-10 | 1.40E-08 | SLC18B1  | solute carrier family 18, subfamily B, member  | Multiple_Complex |

|                      |       |       |       |          |          |            |                                                    |                  |
|----------------------|-------|-------|-------|----------|----------|------------|----------------------------------------------------|------------------|
| TC0700013510.hg.1    | 9.53  | 11.31 | -3.43 | 6.86E-10 | 1.41E-08 | KDELR2     | KDEL (Lys-Asp-Glu-Leu) endoplasmic reticulum       | Multiple_Complex |
| TC1100011280.hg.1    | 5.77  | 6.85  | -2.11 | 6.94E-10 | 1.42E-08 | YIF1A      | Yip1 interacting factor homolog A (S. cerevisia    | Multiple_Complex |
| TC2200008001.hg.1    | 7.74  | 9.23  | -2.81 | 7.02E-10 | 1.44E-08 | TXNRD2     | thioredoxin reductase 2                            | Multiple_Complex |
| TC1400007603.hg.1    | 6.69  | 4.95  | 3.34  | 7.11E-10 | 1.45E-08 | RGS6       | regulator of G-protein signaling 6                 | Multiple_Complex |
| TC0200015506.hg.1    | 9.05  | 10.37 | -2.51 | 7.13E-10 | 1.46E-08 | INO80D     | INO80 complex subunit D                            | Multiple_Complex |
| TC0100016944.hg.1    | 11.88 | 10.16 | 3.3   | 7.15E-10 | 1.46E-08 | ARL8A      | ADP-ribosylation factor like GTPase 8A             | Multiple_Complex |
| TC1100007790.hg.1    | 7.25  | 9.79  | -5.8  | 7.44E-10 | 1.52E-08 | CD5        | CD5 molecule                                       | Multiple_Complex |
| TC1100011014.hg.1    | 7.79  | 6.13  | 3.17  | 7.44E-10 | 1.52E-08 | SLC15A3    | solute carrier family 15 (oligopeptide transpor    | Multiple_Complex |
| TC0400008984.hg.1    | 14.97 | 9.49  | 44.43 | 7.53E-10 | 1.53E-08 | RPS3A; SNC | ribosomal protein S3A; small nucleolar RNA, C      | Multiple_Complex |
| TC1500007510.hg.1    | 7.8   | 5.46  | 5.09  | 7.53E-10 | 1.53E-08 | TPM1       | tropomyosin 1 (alpha)                              | Multiple_Complex |
| TC1200009375.hg.1    | 12.54 | 10.17 | 5.14  | 7.55E-10 | 1.53E-08 | GLT1D1     | glycosyltransferase 1 domain containing 1          | Multiple_Complex |
| TC0100015330.hg.1    | 7.32  | 5.72  | 3.03  | 7.56E-10 | 1.54E-08 | PHTF1      | putative homeodomain transcription factor 1        | Multiple_Complex |
| TC1600009746.hg.1    | 6.89  | 8     | -2.16 | 7.58E-10 | 1.54E-08 | PALB2      | partner and localizer of BRCA2                     | Multiple_Complex |
| TC1400009147.hg.1    | 14.55 | 10.97 | 11.98 | 7.59E-10 | 1.54E-08 | PYGL       | phosphorylase, glycogen, liver                     | Multiple_Complex |
| TSUnmapped00000068.h | 5.08  | 6.73  | -3.15 | 7.62E-10 | 1.54E-08 | ZNF780A    | zinc finger protein 780A                           | Coding           |
| TC0200012994.hg.1    | 8.57  | 7.05  | 2.88  | 7.64E-10 | 1.54E-08 | SNRPG      | small nuclear ribonucleoprotein polypeptide C      | Multiple_Complex |
| TC1100008144.hg.1    | 8.97  | 11.02 | -4.14 | 7.74E-10 | 1.56E-08 | GSTP1      | glutathione S-transferase pi 1                     | Multiple_Complex |
| TC1900011754.hg.1    | 3.43  | 5.19  | -3.38 | 7.75E-10 | 1.56E-08 | ZNF225     | zinc finger protein 225                            | Multiple_Complex |
| TC0200010112.hg.1    | 5.65  | 6.94  | -2.44 | 7.75E-10 | 1.56E-08 | RBM45      | RNA binding motif protein 45                       | Multiple_Complex |
| TC1100010887.hg.1    | 6.31  | 8.03  | -3.29 | 7.77E-10 | 1.57E-08 | SSRP1      | structure specific recognition protein 1           | Multiple_Complex |
| TC0900008984.hg.1    | 9.04  | 11.02 | -3.94 | 7.88E-10 | 1.59E-08 | NUP214     | nucleoporin 214kDa                                 | Multiple_Complex |
| TC0X00009268.hg.1    | 7.35  | 4.6   | 6.7   | 7.90E-10 | 1.59E-08 | PCYT1B     | phosphate cytidyltransferase 1, choline, bet       | Multiple_Complex |
| TC1200010794.hg.1    | 6.87  | 8.64  | -3.39 | 7.95E-10 | 1.60E-08 | ITGB7      | integrin beta 7                                    | Multiple_Complex |
| TC0800008715.hg.1    | 7.89  | 9.29  | -2.62 | 7.97E-10 | 1.60E-08 | ZHX2       | zinc fingers and homeoboxes 2                      | Coding           |
| TC0100010499.hg.1    | 9.59  | 11.68 | -4.24 | 8.06E-10 | 1.62E-08 | POU2F1     | POU class 2 homeobox 1                             | Multiple_Complex |
| TC1100008270.hg.1    | 8.92  | 7.16  | 3.41  | 8.17E-10 | 1.64E-08 | CTTN       | cortactin                                          | Multiple_Complex |
| TC1800008235.hg.1    | 6.09  | 8.04  | -3.88 | 8.19E-10 | 1.64E-08 | ABHD3      | Transcript Identified by AceView, Entrez Gene      | Unassigned       |
| TC1100013015.hg.1    | 6.49  | 8.93  | -5.42 | 8.19E-10 | 1.64E-08 | MS4A14     | membrane-spanning 4-domains, subfamily A,          | Multiple_Complex |
| TC0900007663.hg.1    | 6.29  | 8.76  | -5.55 | 8.31E-10 | 1.66E-08 | CEP78      | centrosomal protein 78kDa                          | Multiple_Complex |
| TC0100012673.hg.1    | 6.75  | 7.94  | -2.28 | 8.33E-10 | 1.66E-08 | ICMT       | isoprenylcysteine carboxyl methyltransferase       | Multiple_Complex |
| TC0100011253.hg.1    | 12.04 | 10.3  | 3.33  | 8.56E-10 | 1.71E-08 | BTG2       | BTG family, member 2                               | Multiple_Complex |
| TC0600012003.hg.1    | 8.09  | 5.66  | 5.39  | 8.67E-10 | 1.73E-08 | CRISP3     | cysteine-rich secretory protein 3                  | Coding           |
| TC0200016115.hg.1    | 8.15  | 10.68 | -5.79 | 8.75E-10 | 1.74E-08 | ARL4C      | ADP-ribosylation factor like GTPase 4C             | Multiple_Complex |
| TC1600011368.hg.1    | 8.96  | 11    | -4.11 | 8.79E-10 | 1.75E-08 | LAT        | linker for activation of T-cells                   | Multiple_Complex |
| TC1200011527.hg.1    | 14.23 | 9.96  | 19.39 | 8.91E-10 | 1.77E-08 | RPL41P5    | ribosomal protein L41 pseudogene 5                 | Multiple_Complex |
| TC0600012061.hg.1    | 6.15  | 8.03  | -3.69 | 8.93E-10 | 1.77E-08 | ICK        | intestinal cell (MAK-like) kinase                  | Multiple_Complex |
| TC1700011237.hg.1    | 9.2   | 10.26 | -2.08 | 9.04E-10 | 1.79E-08 | VEZF1      | vascular endothelial zinc finger 1                 | Multiple_Complex |
| TC0100013293.hg.1    | 3.44  | 5.21  | -3.41 | 9.08E-10 | 1.80E-08 | ID3        | inhibitor of DNA binding 3, dominant negative      | Multiple_Complex |
| TC0300013912.hg.1    | 6.63  | 5.46  | 2.26  | 9.11E-10 | 1.80E-08 | DNAJB11    | DnaJ (Hsp40) homolog, subfamily B, member          | Coding           |
| TC0100013588.hg.1    | 15.14 | 13.68 | 2.75  | 9.17E-10 | 1.81E-08 | PTP4A2     | protein tyrosine phosphatase type IVA, memb        | Multiple_Complex |
| TC0200016586.hg.1    | 9.6   | 7.9   | 3.24  | 9.17E-10 | 1.81E-08 | HSPE1-MO   | HSPE1-MOB4 readthrough                             | Coding           |
| TC1800006657.hg.1    | 9.5   | 7.7   | 3.49  | 9.19E-10 | 1.81E-08 | VAPA       | Memczak2013 ALT_ACCEPTOR, ALT_DONOR,               | NonCoding        |
| TC0600014276.hg.1    | 9.65  | 11.5  | -3.59 | 9.27E-10 | 1.83E-08 | HLA-DMB    | major histocompatibility complex, class II, DM     | Multiple_Complex |
| TC0600009455.hg.1    | 8.01  | 6.03  | 3.95  | 9.33E-10 | 1.84E-08 | ARG1       | arginase 1                                         | Multiple_Complex |
| TC2000007169.hg.1    | 11.13 | 9.17  | 3.9   | 9.36E-10 | 1.84E-08 | CHMP4B     | charged multivesicular body protein 4B             | Multiple_Complex |
| TC0300008715.hg.1    | 5.69  | 7.25  | -2.96 | 9.40E-10 | 1.85E-08 | EEFSEC     | eukaryotic elongation factor, selenocysteine-t     | Multiple_Complex |
| TC1900012040.hg.1    | 10.5  | 8.85  | 3.13  | 9.42E-10 | 1.85E-08 | LILRA5     | leukocyte immunoglobulin-like receptor, subf       | Multiple_Complex |
| TC0300009282.hg.1    | 10.86 | 9.05  | 3.52  | 9.47E-10 | 1.86E-08 | TIPARP     | TCDD-inducible poly(ADP-ribose) polymerase         | Multiple_Complex |
| TC1500009005.hg.1    | 6.43  | 8     | -2.95 | 9.56E-10 | 1.87E-08 | ZNF770     | zinc finger protein 770                            | Multiple_Complex |
| TC1100007787.hg.1    | 7.85  | 10.63 | -6.83 | 9.56E-10 | 1.87E-08 | CD6        | CD6 molecule                                       | Multiple_Complex |
| TC1100013025.hg.1    | 6.57  | 7.85  | -2.42 | 9.58E-10 | 1.88E-08 | TTC9C      | tetratricopeptide repeat domain 9C                 | Multiple_Complex |
| TC2200008186.hg.1    | 6.01  | 7.61  | -3.04 | 9.59E-10 | 1.88E-08 | CHCHD10    | coiled-coil-helix-coiled-coil-helix domain cont    | Multiple_Complex |
| TC0900012167.hg.1    | 10.42 | 8.64  | 3.42  | 9.80E-10 | 1.92E-08 | GSN        | gelsolin                                           | Multiple_Complex |
| TC2200007973.hg.1    | 10.33 | 9.03  | 2.46  | 9.81E-10 | 1.92E-08 | DGCR14     | Transcript Identified by AceView, Entrez Gene      | Unassigned       |
| TC1100013222.hg.1    | 13.37 | 10.12 | 9.53  | 9.89E-10 | 1.93E-08 | CARD16     | caspase recruitment domain family, member          | Multiple_Complex |
| TC1700009535.hg.1    | 5.84  | 4.09  | 3.36  | 9.93E-10 | 1.94E-08 | CHRNE      | cholinergic receptor, nicotinic epsilon            | Multiple_Complex |
| TC0800007766.hg.1    | 12.54 | 11.21 | 2.51  | 9.98E-10 | 1.94E-08 | RAB2A      | RAB2A, member RAS oncogene family                  | Multiple_Complex |
| TC0300013701.hg.1    | 11.22 | 8.81  | 5.3   | 1.00E-09 | 1.95E-08 | UBXN7      | UBX domain protein 7                               | Multiple_Complex |
| TC1700009293.hg.1    | 7.77  | 6.2   | 2.96  | 1.02E-09 | 1.98E-08 | METRNL     | meteorin, glial cell differentiation regulator-lik | Multiple_Complex |
| TC0300012000.hg.1    | 12.07 | 10.25 | 3.51  | 1.02E-09 | 1.99E-08 | ATG3       | autophagy related 3                                | Multiple_Complex |
| TC0200007200.hg.1    | 10.04 | 7.27  | 6.82  | 1.02E-09 | 1.99E-08 | LTBP1      | latent transforming growth factor beta binding     | Multiple_Complex |
| TC0600007598.hg.1    | 17.85 | 13.59 | 19.09 | 1.04E-09 | 2.02E-08 | AIF1       | allograft inflammatory factor 1                    | Multiple_Complex |
| TC1700010982.hg.1    | 6.11  | 8.17  | -4.15 | 1.04E-09 | 2.02E-08 | SKAP1      | src kinase associated phosphoprotein 1             | Multiple_Complex |
| TC1000012025.hg.1    | 9.74  | 11.04 | -2.46 | 1.07E-09 | 2.07E-08 | MCMBP      | minichromosome maintenance complex bindi           | Multiple_Complex |
| TC0500009055.hg.1    | 6.91  | 4.74  | 4.49  | 1.07E-09 | 2.08E-08 | ABLIM3     | actin binding LIM protein family, member 3         | Multiple_Complex |
| TC0500010585.hg.1    | 15.12 | 10.48 | 24.89 | 1.09E-09 | 2.10E-08 | RPL37      | ribosomal protein L37                              | Multiple_Complex |
| TC0500011212.hg.1    | 8.38  | 5.77  | 6.08  | 1.09E-09 | 2.11E-08 | TBCA       | tubulin folding cofactor A                         | Multiple_Complex |
| TC0600011913.hg.1    | 7.65  | 6.52  | 2.19  | 1.10E-09 | 2.12E-08 | NFKBIE     | nuclear factor of kappa light polypeptide gene     | Multiple_Complex |
| TC0200016645.hg.1    | 8.99  | 10.46 | -2.77 | 1.11E-09 | 2.14E-08 | ASXL2      | additional sex combs like transcriptional regul    | Multiple_Complex |
| TC0100016364.hg.1    | 7.55  | 8.89  | -2.53 | 1.12E-09 | 2.15E-08 | SCYL3      | SCY1-like, kinase-like 3                           | Multiple_Complex |

|                   |       |       |        |          |                                                                       |                  |
|-------------------|-------|-------|--------|----------|-----------------------------------------------------------------------|------------------|
| TC0200014190.hg.1 | 6.45  | 8     | -2.94  | 1.12E-09 | 2.15E-08 AMMECR1 AMMECR1 like                                         | Multiple_Complex |
| TC1100009166.hg.1 | 13.31 | 11.48 | 3.57   | 1.13E-09 | 2.17E-08 PAFAH1B2 platelet-activating factor acetylhydrolase 1b, c    | Multiple_Complex |
| TC1100007876.hg.1 | 13.98 | 15.94 | -3.9   | 1.13E-09 | 2.17E-08 TMEM179F transmembrane protein 179B; microRNA 674f           | Multiple_Complex |
| TC1000009172.hg.1 | 9.28  | 11    | -3.31  | 1.13E-09 | 2.17E-08 BUB3 BUB3 mitotic checkpoint protein                         | Multiple_Complex |
| TC1100013110.hg.1 | 11.89 | 14.18 | -4.88  | 1.14E-09 | 2.18E-08 STT3A STT3A, subunit of the oligosaccharyltransferase        | Multiple_Complex |
| TC1700008218.hg.1 | 5.15  | 6.59  | -2.72  | 1.14E-09 | 2.19E-08 FLJ45513; F1 characterized LOC729220; novel transcript       | Multiple_Complex |
| TC1900008992.hg.1 | 3.99  | 5.65  | -3.16  | 1.15E-09 | 2.19E-08 ZNF543 zinc finger protein 543                               | Multiple_Complex |
| TC1900008372.hg.1 | 8.33  | 9.5   | -2.25  | 1.16E-09 | 2.21E-08 PPP5C protein phosphatase 5, catalytic subunit               | Multiple_Complex |
| TC1800007385.hg.1 | 6.94  | 8.35  | -2.66  | 1.20E-09 | 2.28E-08 WDR7 WD repeat domain 7                                      | Multiple_Complex |
| TC0100017748.hg.1 | 7.85  | 6.06  | 3.46   | 1.21E-09 | 2.30E-08 SIPA1L2 signal-induced proliferation-associated 1 like 1     | Multiple_Complex |
| TC1700012245.hg.1 | 5.56  | 6.84  | -2.42  | 1.21E-09 | 2.30E-08 CDK12 cyclin-dependent kinase 12                             | NonCoding        |
| TC1700012445.hg.1 | 8.39  | 10.14 | -3.36  | 1.22E-09 | 2.32E-08 STRADA STE20-related kinase adaptor alpha                    | Multiple_Complex |
| TC0600011635.hg.1 | 13.45 | 10.92 | 5.79   | 1.22E-09 | 2.32E-08 FKBP5 FK506 binding protein 5                                | Multiple_Complex |
| TC1100007899.hg.1 | 8     | 10.37 | -5.19  | 1.26E-09 | 2.39E-08 RARRES3 retinoic acid receptor responder (tazarotene ii      | Multiple_Complex |
| TC1000012603.hg.1 | 9.82  | 11.38 | -2.94  | 1.27E-09 | 2.42E-08 FAM53B family with sequence similarity 53, member B          | Multiple_Complex |
| TC0700013626.hg.1 | 11.58 | 9.37  | 4.62   | 1.27E-09 | 2.42E-08 SLC37A3 solute carrier family 37, member 3                   | Multiple_Complex |
| TC0100016049.hg.1 | 6.95  | 9.97  | -8.11  | 1.27E-09 | 2.42E-08 FCRL3 Fc receptor-like 3                                     | Multiple_Complex |
| TC0900009882.hg.1 | 10.39 | 14.95 | -23.63 | 1.29E-09 | 2.44E-08 DCAF12 DDB1 and CUL4 associated factor 12                    | Multiple_Complex |
| TC0200015771.hg.1 | 14.69 | 13.02 | 3.18   | 1.30E-09 | 2.45E-08 TUBA4A tubulin, alpha 4a                                     | Multiple_Complex |
| TC1500009702.hg.1 | 8.19  | 5.59  | 6.06   | 1.31E-09 | 2.47E-08 RPS27L ribosomal protein S27-like                            | Multiple_Complex |
| TC1900007125.hg.1 | 6.06  | 7.94  | -3.67  | 1.31E-09 | 2.48E-08 NACC1 nucleus accumbens associated 1, BEN and BTF            | Multiple_Complex |
| TC0400010904.hg.1 | 12.95 | 11.21 | 3.35   | 1.33E-09 | 2.50E-08 YTHDC1 YTH domain containing 1                               | Multiple_Complex |
| TC1900008019.hg.1 | 11.52 | 13.1  | -2.99  | 1.34E-09 | 2.53E-08 EIF3K eukaryotic translation initiation factor 3, subu       | Multiple_Complex |
| TC0300011450.hg.1 | 10.22 | 8.93  | 2.44   | 1.34E-09 | 2.53E-08 TMF1 TATA element modulatory factor 1                        | Multiple_Complex |
| TC1500009363.hg.1 | 10.47 | 8.02  | 5.48   | 1.35E-09 | 2.54E-08 COPS2 COP9 signalosome subunit 2                             | Multiple_Complex |
| TC0200015266.hg.1 | 4.99  | 3.62  | 2.58   | 1.37E-09 | 2.59E-08 TMEFF2 transmembrane protein with EGF-like and twc           | Multiple_Complex |
| TC1000007779.hg.1 | 6.27  | 7.39  | -2.18  | 1.38E-09 | 2.59E-08 ADO 2-aminoethanethiol (cysteamine) dioxygenase              | Coding           |
| TC1900007012.hg.1 | 8.57  | 6.88  | 3.22   | 1.39E-09 | 2.60E-08 LDLR; MIRE low density lipoprotein receptor; microRNA 6i     | Multiple_Complex |
| TC0700012970.hg.1 | 4.89  | 6.07  | -2.26  | 1.39E-09 | 2.61E-08 ZNF786 zinc finger protein 786                               | Multiple_Complex |
| TC1900011952.hg.1 | 7.04  | 8.71  | -3.18  | 1.39E-09 | 2.61E-08 ZNF780A zinc finger protein 780A                             | Multiple_Complex |
| TC1500009120.hg.1 | 7.08  | 8.3   | -2.32  | 1.41E-09 | 2.64E-08 RMDN3 regulator of microtubule dynamics 3                    | Multiple_Complex |
| TC1700011785.hg.1 | 7.3   | 9.16  | -3.63  | 1.41E-09 | 2.64E-08 EXOC7 Zhang2013 ALT_ACCEPTOR, ALT_DONOR, cod                 | NonCoding        |
| TC2000008968.hg.1 | 5.85  | 7.24  | -2.63  | 1.42E-09 | 2.66E-08 UQC1 ubiquinol-cytochrome c reductase complex as             | Multiple_Complex |
| TC0300008320.hg.1 | 9.3   | 12.16 | -7.28  | 1.44E-09 | 2.69E-08 CD96 CD96 molecule                                           | Multiple_Complex |
| TC0400012992.hg.1 | 7.45  | 5.53  | 3.79   | 1.44E-09 | 2.69E-08 MFAP3L microfibrillar associated protein 3 like              | Coding           |
| TC1000008988.hg.1 | 6.55  | 7.62  | -2.1   | 1.45E-09 | 2.70E-08 TRUB1 TruB pseudouridine (psi) synthase family mem           | Multiple_Complex |
| TC0200011086.hg.1 | 5.87  | 7.64  | -3.41  | 1.46E-09 | 2.71E-08 DIS3L2 DIS3 like 3-5 exoribonuclease 2                       | Multiple_Complex |
| TC1300008181.hg.1 | 7.29  | 9.06  | -3.42  | 1.47E-09 | 2.74E-08 CHAMP1 chromosome alignment maintaining phospho              | Multiple_Complex |
| TC1600008657.hg.1 | 8.65  | 10.34 | -3.21  | 1.48E-09 | 2.75E-08 USP10 ubiquitin specific peptidase 10                        | Multiple_Complex |
| TC1200008081.hg.1 | 6.43  | 8.09  | -3.16  | 1.48E-09 | 2.75E-08 DYRK2 dual specificity tyrosine-(Y)-phosphorylation r        | Multiple_Complex |
| TC0200016442.hg.1 | 6.27  | 8.09  | -3.51  | 1.50E-09 | 2.78E-08 MSH2 mutS homolog 2                                          | Multiple_Complex |
| TC0300008002.hg.1 | 9.3   | 8.16  | 2.2    | 1.54E-09 | 2.85E-08 CHMP2B charged multivesicular body protein 2B                | Multiple_Complex |
| TC1700007127.hg.1 | 9.19  | 11.69 | -5.66  | 1.57E-09 | 2.91E-08 LGALS9C; L lectin, galactoside-binding, soluble, 9C; lectin, | Multiple_Complex |
| TC1800007820.hg.1 | 10.28 | 9.49  | 1.72   | 1.57E-09 | 2.91E-08 CTDP1 CTD phosphatase subunit 1                              | Multiple_Complex |
| TC0600007677.hg.1 | 10.95 | 14.6  | -12.55 | 1.59E-09 | 2.95E-08 HLA-DPB1 major histocompatibility complex, class II, DP      | Multiple_Complex |
| TC1900007127.hg.1 | 11.24 | 8.81  | 5.39   | 1.61E-09 | 2.97E-08 IER2 immediate early response 2                              | Coding           |
| TC0200012073.hg.1 | 6.61  | 8.21  | -3.04  | 1.63E-09 | 3.00E-08 GTF3C2 general transcription factor IIIC subunit 2           | Multiple_Complex |
| TC1100011545.hg.1 | 8.38  | 6.42  | 3.9    | 1.64E-09 | 3.02E-08 ANAPC15 anaphase promoting complex subunit 15                | Multiple_Complex |
| TC0800012306.hg.1 | 4.85  | 6.26  | -2.65  | 1.65E-09 | 3.04E-08 MTFR1 mitochondrial fission regulator 1                      | NonCoding        |
| TC1600011350.hg.1 | 6     | 7.46  | -2.74  | 1.65E-09 | 3.04E-08 PMM2 phosphomannomutase 2                                    | Multiple_Complex |
| TC0100015819.hg.1 | 14.26 | 16.04 | -3.44  | 1.66E-09 | 3.06E-08 S100A10 S100 calcium binding protein A10                     | Multiple_Complex |
| TC0800012176.hg.1 | 8.81  | 7.24  | 2.96   | 1.66E-09 | 3.06E-08 PLEC plectin                                                 | Multiple_Complex |
| TC1800006902.hg.1 | 7.17  | 8.68  | -2.84  | 1.67E-09 | 3.06E-08 TTC39C tetratricopeptide repeat domain 39C                   | Multiple_Complex |
| TC0300007124.hg.1 | 5.77  | 6.95  | -2.26  | 1.68E-09 | 3.08E-08 ZNF621 zinc finger protein 621                               | Multiple_Complex |
| TC0800007004.hg.1 | 5.02  | 6.62  | -3.04  | 1.69E-09 | 3.10E-08 RHOBTB2 Rho-related BTB domain containing 2                  | Multiple_Complex |
| TC1200009235.hg.1 | 7.32  | 8.6   | -2.43  | 1.70E-09 | 3.12E-08 C12orf65 chromosome 12 open reading frame 65                 | Multiple_Complex |
| TC0900011501.hg.1 | 6.46  | 4.98  | 2.8    | 1.71E-09 | 3.14E-08 NR6A1 nuclear receptor subfamily 6, group A, membe           | Multiple_Complex |
| TC1100006576.hg.1 | 8.67  | 10.46 | -3.44  | 1.72E-09 | 3.14E-08 CD81 CD81 molecule                                           | Multiple_Complex |
| TC1700009318.hg.1 | 13.39 | 10.42 | 7.83   | 1.72E-09 | 3.14E-08 FAM101B family with sequence similarity 101, member          | Multiple_Complex |
| TC0300008114.hg.1 | 5.05  | 7.21  | -4.47  | 1.72E-09 | 3.15E-08 GPR15 G protein-coupled receptor 15                          | Coding           |
| TC1000009873.hg.1 | 7.76  | 8.85  | -2.13  | 1.74E-09 | 3.18E-08 DCLRE1C DNA cross-link repair 1C                             | Multiple_Complex |
| TC1000012088.hg.1 | 5.83  | 6.9   | -2.09  | 1.76E-09 | 3.20E-08 C10orf88 chromosome 10 open reading frame 88                 | Multiple_Complex |
| TC0700013400.hg.1 | 8.45  | 10.02 | -2.98  | 1.78E-09 | 3.24E-08 GATAD1 GATA zinc finger domain containing 1                  | Multiple_Complex |
| TC1900011793.hg.1 | 7.68  | 9.23  | -2.92  | 1.79E-09 | 3.25E-08 ZNF808; RP zinc finger protein 808; ribosomal protein L39    | Multiple_Complex |
| TC0300006942.hg.1 | 12.53 | 13.99 | -2.75  | 1.79E-09 | 3.25E-08 STT3B STT3B, subunit of the oligosaccharyltransferase        | Multiple_Complex |
| TC1400006686.hg.1 | 8.47  | 5.52  | 7.74   | 1.80E-09 | 3.28E-08 CMTM5 CKLF-like MARVEL transmembrane domain co               | Multiple_Complex |
| TC0600007262.hg.1 | 6.92  | 4.88  | 4.12   | 1.81E-09 | 3.28E-08 HIST1H3A histone cluster 1, H3a                              | Coding           |
| TC1100012126.hg.1 | 12.32 | 6.8   | 45.7   | 1.82E-09 | 3.29E-08 MMP8 matrix metalloproteinase 8                              | Coding           |
| TC1000010725.hg.1 | 11.35 | 12.77 | -2.69  | 1.82E-09 | 3.31E-08 CCDC6 coiled-coil domain containing 6                        | Multiple_Complex |
| TC0500012238.hg.1 | 7.88  | 6.02  | 3.64   | 1.84E-09 | 3.34E-08 HBEGF heparin-binding EGF-like growth factor                 | Multiple_Complex |

|                      |       |       |        |          |          |            |                                                   |                  |
|----------------------|-------|-------|--------|----------|----------|------------|---------------------------------------------------|------------------|
| TC0200016686.hg.1    | 8.1   | 9.6   | -2.83  | 1.85E-09 | 3.35E-08 | TEX261     | testis expressed 261                              | Multiple_Complex |
| TC1900007988.hg.1    | 7.66  | 9.38  | -3.29  | 1.87E-09 | 3.38E-08 | SIPAL13    | signal-induced proliferation-associated 1 like 1  | Multiple_Complex |
| TC0800008146.hg.1    | 4.89  | 7.01  | -4.32  | 1.87E-09 | 3.38E-08 | WWP1       | Transcript Identified by AceView, Entrez Gene     | Unassigned       |
| TC0X00009611.hg.1    | 7.67  | 10.98 | -9.88  | 1.88E-09 | 3.39E-08 | SLC38A5    | solute carrier family 38, member 5                | Multiple_Complex |
| TC0100009560.hg.1    | 7.43  | 8.76  | -2.51  | 1.88E-09 | 3.40E-08 | CD101      | CD101 molecule                                    | Multiple_Complex |
| TC2000009440.hg.1    | 10.11 | 11.67 | -2.95  | 1.90E-09 | 3.42E-08 | ADNP       | activity-dependent neuroprotector homeobox        | Multiple_Complex |
| TC1100013161.hg.1    | 9.91  | 8.14  | 3.41   | 1.90E-09 | 3.42E-08 | CD59       | CD59 molecule, complement regulatory prote        | Multiple_Complex |
| TC2000007819.hg.1    | 6.04  | 7.64  | -3.04  | 1.94E-09 | 3.48E-08 | CSTF1      | cleavage stimulation factor, 3 pre-RNA, subun     | Multiple_Complex |
| TC0700007905.hg.1    | 6.18  | 8.02  | -3.59  | 1.95E-09 | 3.50E-08 | AUTS2      | autism susceptibility candidate 2                 | Multiple_Complex |
| TC1000011825.hg.1    | 10.01 | 8.84  | 2.25   | 1.95E-09 | 3.50E-08 | BBIP1      | BBSome interacting protein 1                      | Multiple_Complex |
| TC2200008578.hg.1    | 10.24 | 6.23  | 16.07  | 2.00E-09 | 3.58E-08 | RPL41      | Synthetic construct Homo sapiens clone IMAG       | Multiple_Complex |
| TC1400009980.hg.1    | 9.52  | 11.24 | -3.28  | 2.02E-09 | 3.63E-08 | CCDC88C    | coiled-coil domain containing 88C                 | Multiple_Complex |
| TC0X00010357.hg.1    | 7.92  | 5.8   | 4.33   | 2.05E-09 | 3.67E-08 | GLA        | galactosidase, alpha                              | Multiple_Complex |
| TC1000007954.hg.1    | 4.6   | 6.37  | -3.4   | 2.06E-09 | 3.69E-08 | SLC29A3    | solute carrier family 29 (equilibrative nucleosi  | Multiple_Complex |
| TC0900011669.hg.1    | 6.86  | 8.32  | -2.75  | 2.06E-09 | 3.69E-08 | SH3GLB2    | SH3-domain GRB2-like endophilin B2                | Multiple_Complex |
| TC0200016662.hg.1    | 12.12 | 9.01  | 8.65   | 2.07E-09 | 3.70E-08 | CALM2      | calmodulin 2 (phosphorylase kinase, delta)        | Multiple_Complex |
| TC0900006969.hg.1    | 10.13 | 8.08  | 4.15   | 2.07E-09 | 3.70E-08 | CHMP5      | charged multivesicular body protein 5             | Multiple_Complex |
| TC1100013190.hg.1    | 14.74 | 16.44 | -3.25  | 2.12E-09 | 3.78E-08 | CFL1       | cofilin 1 (non-muscle)                            | Multiple_Complex |
| TC1500009585.hg.1    | 8.35  | 6.7   | 3.13   | 2.14E-09 | 3.81E-08 | SLTM       | SAFB-like, transcription modulator                | Multiple_Complex |
| TC1200012753.hg.1    | 6.31  | 9.76  | -10.9  | 2.15E-09 | 3.83E-08 | KLRC2      | killer cell lectin-like receptor subfamily C, men | Coding           |
| TC0100013472.hg.1    | 10.28 | 7.88  | 5.28   | 2.16E-09 | 3.85E-08 | DNAJC8     | DnaJ (Hsp40) homolog, subfamily C, member         | Multiple_Complex |
| TC1900009637.hg.1    | 8.27  | 6.6   | 3.17   | 2.17E-09 | 3.85E-08 | CDKN2D     | cyclin-dependent kinase inhibitor 2D (p19, inh    | Coding           |
| TC0600014261.hg.1    | 11.07 | 12.43 | -2.57  | 2.18E-09 | 3.87E-08 | DDX39B; SI | DEAD (Asp-Glu-Ala-Asp) box polypeptide 39B;       | Multiple_Complex |
| TC0200007900.hg.1    | 11.26 | 13.21 | -3.85  | 2.18E-09 | 3.87E-08 | ARHGAP25   | Rho GTPase activating protein 25                  | Multiple_Complex |
| TC1900011251.hg.1    | 11.46 | 14.77 | -9.94  | 2.18E-09 | 3.87E-08 | NKG7       | natural killer cell granule protein 7             | Coding           |
| TC1500010237.hg.1    | 10.71 | 6.44  | 19.31  | 2.20E-09 | 3.89E-08 | RPL9       | ribosomal protein L9                              | Multiple_Complex |
| TC0300006669.hg.1    | 8.55  | 5.35  | 9.2    | 2.20E-09 | 3.90E-08 | LSM3       | LSM3 homolog, U6 small nuclear RNA and mR         | Multiple_Complex |
| TC0300010424.hg.1    | 7.57  | 5.95  | 3.09   | 2.21E-09 | 3.91E-08 | DPH3       | diphthamide biosynthesis 3                        | Multiple_Complex |
| TC2200009234.hg.1    | 11.86 | 9.79  | 4.23   | 2.22E-09 | 3.92E-08 | SPECC1L-AL | SPECC1L-ADORA2A readthrough (NMD candic           | Multiple_Complex |
| TC2200009356.hg.1    | 9.3   | 7.76  | 2.9    | 2.22E-09 | 3.92E-08 | ARFGAP3    | ADP-ribosylation factor GTPase activating proi    | Multiple_Complex |
| TC0500009707.hg.1    | 6.51  | 4.93  | 2.98   | 2.24E-09 | 3.96E-08 | SQSTM1     | Transcript Identified by AceView, Entrez Gene     | Unassigned       |
| TC0600010647.hg.1    | 6.3   | 7.95  | -3.14  | 2.28E-09 | 4.02E-08 | ECI2       | enoyl-CoA delta isomerase 2                       | Multiple_Complex |
| TC1100009450.hg.1    | 5.6   | 6.92  | -2.5   | 2.30E-09 | 4.06E-08 | DCPS       | decapping enzyme, scavenger                       | Multiple_Complex |
| TC0100016162.hg.1    | 5.7   | 7.44  | -3.34  | 2.32E-09 | 4.09E-08 | B4GALT3    | UDP-Gal:betaGlcNAc beta 1,4- galactosyltrans      | Multiple_Complex |
| TC1600008259.hg.1    | 7.91  | 9.7   | -3.46  | 2.32E-09 | 4.09E-08 | P DPR      | pyruvate dehydrogenase phosphatase regulat        | Multiple_Complex |
| TSUnmapped00000095.h | 5.44  | 4.34  | 2.15   | 2.33E-09 | 4.09E-08 | NDUFA6     | NADH dehydrogenase (ubiquinone) 1 alpha su        | Coding           |
| TC1800007360.hg.1    | 10.96 | 8.43  | 5.77   | 2.33E-09 | 4.09E-08 | RAB27B     | RAB27B, member RAS oncogene family                | Multiple_Complex |
| TC0100017505.hg.1    | 9.6   | 8.37  | 2.33   | 2.34E-09 | 4.11E-08 | SDE2       | SDE2 telomere maintenance homolog (S. pom         | Multiple_Complex |
| TC1400008752.hg.1    | 8.74  | 10.77 | -4.08  | 2.35E-09 | 4.11E-08 | CIDEB      | cell death-inducing DFFA-like effector b          | Multiple_Complex |
| TC1200012716.hg.1    | 11.56 | 9.84  | 3.29   | 2.38E-09 | 4.17E-08 | COX6A1     | cytochrome c oxidase subunit VIa polypeptide      | Multiple_Complex |
| TC0700008552.hg.1    | 4.84  | 6.34  | -2.83  | 2.40E-09 | 4.20E-08 | ARFGP2     | ArfGAP with FG repeats 2                          | Multiple_Complex |
| TC1700012216.hg.1    | 11.95 | 14.8  | -7.18  | 2.43E-09 | 4.25E-08 | LGALS9     | lectin, galactoside-binding, soluble, 9           | Multiple_Complex |
| TC1600007952.hg.1    | 7.61  | 9.25  | -3.11  | 2.44E-09 | 4.27E-08 | OGFOD1     | 2-oxoglutarate and iron-dependent oxygenase       | Multiple_Complex |
| TC2200008704.hg.1    | 6.72  | 4.91  | 3.49   | 2.50E-09 | 4.36E-08 | DMC1       | DNA meiotic recombinase 1                         | Multiple_Complex |
| TC0200010445.hg.1    | 7.37  | 8.7   | -2.51  | 2.52E-09 | 4.39E-08 | CASP10     | caspase 10                                        | Multiple_Complex |
| TC1600011186.hg.1    | 9.13  | 7.03  | 4.29   | 2.53E-09 | 4.42E-08 | SLC7A5     | solute carrier family 7 (amino acid transporter   | Multiple_Complex |
| TC0700011698.hg.1    | 10.75 | 12.29 | -2.92  | 2.55E-09 | 4.44E-08 | TMEM243    | transmembrane protein 243, mitochondrial          | Multiple_Complex |
| TC0600011525.hg.1    | 9.31  | 10.5  | -2.28  | 2.56E-09 | 4.45E-08 | RXRβ       | retinoid X receptor beta                          | Multiple_Complex |
| TC0800010823.hg.1    | 9.7   | 8.15  | 2.92   | 2.56E-09 | 4.45E-08 | TCEB1      | transcription elongation factor B (SIII), polypep | Multiple_Complex |
| TC0900008250.hg.1    | 6.2   | 8.04  | -3.59  | 2.57E-09 | 4.46E-08 | ZNF189     | zinc finger protein 189                           | Multiple_Complex |
| TC1500006663.hg.1    | 11.43 | 7.54  | 14.8   | 2.58E-09 | 4.48E-08 | RPL41P2    | ribosomal protein L41 pseudogene 2                | Multiple_Complex |
| TC0600011282.hg.1    | 7     | 8.74  | -3.33  | 2.61E-09 | 4.53E-08 | TRIM27     | tripartite motif containing 27                    | Multiple_Complex |
| TC1100010349.hg.1    | 6.73  | 5.19  | 2.91   | 2.62E-09 | 4.54E-08 | SVIP       | small VCP/p97-interacting protein                 | Multiple_Complex |
| TC1600009417.hg.1    | 10.86 | 9.63  | 2.35   | 2.65E-09 | 4.60E-08 | ZC3H7A     | zinc finger CCCH-type containing 7A               | Multiple_Complex |
| TC0200013875.hg.1    | 9.36  | 7.56  | 3.46   | 2.69E-09 | 4.65E-08 | RGPD8; RG  | RANBP2-like and GRIP domain containing 8; R       | Multiple_Complex |
| TC2200007196.hg.1    | 10.98 | 9.47  | 2.84   | 2.70E-09 | 4.66E-08 | TOM1       | target of myb1 membrane trafficking protein       | Multiple_Complex |
| TC0300013865.hg.1    | 7.07  | 8.16  | -2.13  | 2.76E-09 | 4.77E-08 | SEC22A     | SEC22 homolog A, vesicle trafficking protein      | Multiple_Complex |
| TC0100015561.hg.1    | 6.17  | 7.81  | -3.12  | 2.78E-09 | 4.79E-08 | NBPF15     | neuroblastoma breakpoint family, member 15        | Multiple_Complex |
| TC0600008132.hg.1    | 8.7   | 7.07  | 3.08   | 2.80E-09 | 4.82E-08 | CDC5L      | cell division cycle 5-like                        | Multiple_Complex |
| TSUnmapped00000148.h | 9.26  | 7.09  | 4.52   | 2.80E-09 | 4.82E-08 | PADI4      | peptidyl arginine deiminase, type IV              | NonCoding        |
| TC1700010599.hg.1    | 7.39  | 9.04  | -3.14  | 2.87E-09 | 4.95E-08 | MED24; MI  | mediator complex subunit 24; microRNA 6884        | Multiple_Complex |
| TC1800007960.hg.1    | 7.54  | 8.57  | -2.04  | 2.87E-09 | 4.95E-08 | ZBTB14     | zinc finger and BTB domain containing 14          | Multiple_Complex |
| TC0200014764.hg.1    | 5.99  | 8.02  | -4.11  | 2.88E-09 | 4.95E-08 | DPP4       | dipeptidyl-peptidase 4                            | Multiple_Complex |
| TC1100009453.hg.1    | 7.82  | 5.85  | 3.91   | 2.89E-09 | 4.96E-08 | ST3GAL4    | ST3 beta-galactoside alpha-2,3-sialyltransfera    | Multiple_Complex |
| TC1700011435.hg.1    | 8.23  | 10.13 | -3.72  | 2.89E-09 | 4.96E-08 | ICAM2      | intercellular adhesion molecule 2                 | Multiple_Complex |
| TC1400007710.hg.1    | 9.16  | 7.66  | 2.83   | 2.89E-09 | 4.96E-08 | JDP2       | Jun dimerization protein 2                        | Multiple_Complex |
| TC0500009587.hg.1    | 7.49  | 9.8   | -4.98  | 2.90E-09 | 4.96E-08 | HIGD2A     | HIG1 hypoxia inducible domain family, membe       | Multiple_Complex |
| TC0100013339.hg.1    | 8.63  | 11.97 | -10.16 | 2.94E-09 | 5.04E-08 | RUNX3      | runt-related transcription factor 3               | Multiple_Complex |
| TC1100008175.hg.1    | 6.09  | 7.59  | -2.82  | 2.96E-09 | 5.07E-08 | NDUFS8; M  | NADH dehydrogenase (ubiquinone) Fe-S prote        | Multiple_Complex |
| TC0500013359.hg.1    | 13.09 | 11.74 | 2.54   | 2.99E-09 | 5.11E-08 | PPP2CA     | protein phosphatase 2, catalytic subunit, alph    | Multiple_Complex |

|                      |       |       |       |          |                     |                                                  |                  |
|----------------------|-------|-------|-------|----------|---------------------|--------------------------------------------------|------------------|
| TC0600012968.hg.1    | 6.41  | 4.78  | 3.1   | 3.02E-09 | 5.16E-08 TRAPPC3L   | trafficking protein particle complex 3-like      | Multiple_Complex |
| TC1700010426.hg.1    | 5.89  | 7.25  | -2.57 | 3.02E-09 | 5.16E-08 SLFN13     | schlafen family member 13                        | Multiple_Complex |
| TC1700009528.hg.1    | 12.36 | 9.72  | 6.22  | 3.07E-09 | 5.23E-08 CXCL16     | chemokine (C-X-C motif) ligand 16                | Multiple_Complex |
| TC1600009944.hg.1    | 7.03  | 8.43  | -2.63 | 3.08E-09 | 5.25E-08 KCTD13     | potassium channel tetramerization domain co      | Multiple_Complex |
| TC0200013106.hg.1    | 4.2   | 5.47  | -2.42 | 3.09E-09 | 5.26E-08 CCDC142;   | coiled-coil domain containing 142; mitochond     | Multiple_Complex |
| TC0300012816.hg.1    | 7.2   | 5.39  | 3.5   | 3.12E-09 | 5.31E-08 P2RY12     | purinergic receptor P2Y, G-protein coupled, 1;   | Multiple_Complex |
| TC0200008047.hg.1    | 6.27  | 8.05  | -3.43 | 3.20E-09 | 5.43E-08 ALMS1      | Alstrom syndrome protein 1                       | Multiple_Complex |
| TC0700013370.hg.1    | 8.47  | 10.31 | -3.59 | 3.20E-09 | 5.45E-08 ZNF107; M  | zinc finger protein 107; microRNA 6839           | Multiple_Complex |
| TC1300009332.hg.1    | 4.5   | 6.69  | -4.55 | 3.22E-09 | 5.47E-08 RBM26      | Transcript Identified by AceView, Entrez Gene    | Unassigned       |
| TC1600006738.hg.1    | 5.28  | 6.34  | -2.09 | 3.28E-09 | 5.56E-08 DNAJA3     | DnaJ (Hsp40) homolog, subfamily A, member        | Multiple_Complex |
| TC0200010264.hg.1    | 8.11  | 10.03 | -3.77 | 3.30E-09 | 5.59E-08 MFSO6      | major facilitator superfamily domain containir   | Multiple_Complex |
| TC0200014857.hg.1    | 5.27  | 6.75  | -2.78 | 3.31E-09 | 5.61E-08 FASTKD1    | FAST kinase domains 1                            | Multiple_Complex |
| TC0800008295.hg.1    | 8.27  | 9.36  | -2.13 | 3.34E-09 | 5.65E-08 PTDSS1     | phosphatidylserine synthase 1                    | Multiple_Complex |
| TC0300013847.hg.1    | 10.29 | 8.89  | 2.63  | 3.36E-09 | 5.68E-08 PPP4R2     | protein phosphatase 4, regulatory subunit 2      | Multiple_Complex |
| TC0100012670.hg.1    | 14.82 | 11.54 | 9.72  | 3.37E-09 | 5.70E-08 RPL22      | ribosomal protein L22                            | Multiple_Complex |
| TC1700011305.hg.1    | 7.15  | 8.6   | -2.73 | 3.41E-09 | 5.76E-08 HEATR6     | HEAT repeat containing 6                         | Multiple_Complex |
| TC1200006645.hg.1    | 6.84  | 10.03 | -9.13 | 3.42E-09 | 5.76E-08 CD4        | CD4 molecule                                     | Multiple_Complex |
| TC1600007528.hg.1    | 12.55 | 10.09 | 5.54  | 3.43E-09 | 5.77E-08 ITGAM      | integrin, alpha M (complement component 3        | Multiple_Complex |
| TC1900011071.hg.1    | 8.72  | 10.37 | -3.13 | 3.43E-09 | 5.77E-08 KDELR1     | KDEL (Lys-Asp-Glu-Leu) endoplasmic reticulun     | Multiple_Complex |
| TC1900008699.hg.1    | 6.15  | 7.43  | -2.43 | 3.47E-09 | 5.84E-08 ZNF528     | zinc finger protein 528                          | Multiple_Complex |
| TC0900007576.hg.1    | 14.99 | 10.36 | 24.81 | 3.48E-09 | 5.85E-08 ANXA1      | annexin A1                                       | Multiple_Complex |
| TC2200008482.hg.1    | 6.75  | 8.23  | -2.8  | 3.50E-09 | 5.89E-08 EIF4ENIF1  | eukaryotic translation initiation factor 4E nucl | Multiple_Complex |
| TC0400011395.hg.1    | 9.1   | 7.41  | 3.22  | 3.50E-09 | 5.89E-08 EIF4E      | eukaryotic translation initiation factor 4E      | Multiple_Complex |
| TC1200007835.hg.1    | 6.1   | 7.58  | -2.78 | 3.52E-09 | 5.91E-08 COQ10A     | coenzyme Q10A                                    | Multiple_Complex |
| TC0100017471.hg.1    | 13.61 | 11.84 | 3.41  | 3.53E-09 | 5.92E-08 WDR26; M   | WD repeat domain 26; microRNA 4742               | Multiple_Complex |
| TSUnmapped00000288.h | 7.54  | 5.27  | 4.81  | 3.54E-09 | 5.93E-08 PAD14      | peptidyl arginine deiminase, type IV             | NonCoding        |
| TC1100011131.hg.1    | 13.89 | 15.73 | -3.6  | 3.55E-09 | 5.94E-08 C11orf95   | chromosome 11 open reading frame 95              | Multiple_Complex |
| TC1000009149.hg.1    | 6.9   | 9.06  | -4.44 | 3.55E-09 | 5.94E-08 PLEKHA1    | pleckstrin homology domain containing, famil     | Multiple_Complex |
| TC2200009204.hg.1    | 10.37 | 11.46 | -2.14 | 3.67E-09 | 6.13E-08 PPIL2      | peptidylprolyl isomerase (cyclophilin)-like 2    | Multiple_Complex |
| TC1000008661.hg.1    | 6.95  | 8.21  | -2.4  | 3.69E-09 | 6.17E-08 SLF2       | SMC5-SMC6 complex localization factor 2          | Multiple_Complex |
| TC1800008891.hg.1    | 6.47  | 8.46  | -3.96 | 3.70E-09 | 6.17E-08 BCL2       | B-cell CLL/lymphoma 2                            | Multiple_Complex |
| TC1500008100.hg.1    | 9.57  | 8.38  | 2.29  | 3.73E-09 | 6.22E-08 WHAMM      | WAS protein homolog associated with actin, g     | Multiple_Complex |
| TC0200008823.hg.1    | 9.36  | 7.53  | 3.56  | 3.75E-09 | 6.25E-08 RGPD6; RG  | RANBP2-like and GRIP domain containing 6; R      | Multiple_Complex |
| TC0300014041.hg.1    | 5.98  | 7.22  | -2.35 | 3.77E-09 | 6.27E-08 RUVBL1     | RuvB-like AAA ATPase 1                           | Multiple_Complex |
| TC2200006614.hg.1    | 8.87  | 6.24  | 6.2   | 3.78E-09 | 6.28E-08 GP1BB; SEF | glycoprotein Ib (platelet), beta polypeptide; se | Multiple_Complex |
| TC1400009198.hg.1    | 7.42  | 8.99  | -2.97 | 3.78E-09 | 6.29E-08 DDHD1      | DDHD domain containing 1                         | Multiple_Complex |
| TC0100017078.hg.1    | 6.63  | 7.72  | -2.12 | 3.80E-09 | 6.32E-08 RAB29      | RAB29, member RAS oncogene family                | Multiple_Complex |
| TC0900012229.hg.1    | 5.75  | 7.16  | -2.66 | 3.81E-09 | 6.33E-08 EXOSC3     | exosome component 3                              | Multiple_Complex |
| TC0800010663.hg.1    | 5.67  | 7.17  | -2.84 | 3.82E-09 | 6.34E-08 ARMC1      | armadillo repeat containing 1                    | Multiple_Complex |
| TC0900012160.hg.1    | 7.7   | 5.88  | 3.53  | 3.95E-09 | 6.55E-08 GNG10      | guanine nucleotide binding protein (G protein    | Coding           |
| TC0X00006789.hg.1    | 7.26  | 8.29  | -2.05 | 3.98E-09 | 6.59E-08 FAM3C2     | FAM3C pseudogene                                 | Multiple_Complex |
| TC0600006967.hg.1    | 6.87  | 5.65  | 2.34  | 3.98E-09 | 6.59E-08 EDN1       | endothelin 1                                     | Multiple_Complex |
| TC1000011585.hg.1    | 5.3   | 6.64  | -2.52 | 4.03E-09 | 6.66E-08 GOT1       | glutamic-oxaloacetic transaminase 1, soluble     | Multiple_Complex |
| TC0900010789.hg.1    | 6.37  | 7.9   | -2.88 | 4.03E-09 | 6.67E-08 IARS       | isoleucyl-tRNA synthetase                        | Multiple_Complex |
| TC2200009357.hg.1    | 11.11 | 9.45  | 3.17  | 4.09E-09 | 6.75E-08 PACSIN2    | protein kinase C and casein kinase substrate ir  | Multiple_Complex |
| TC1200010265.hg.1    | 7.81  | 9.1   | -2.45 | 4.13E-09 | 6.81E-08 CAPRIN2    | caprin family member 2                           | Multiple_Complex |
| TC0700013338.hg.1    | 8.14  | 10.12 | -3.95 | 4.16E-09 | 6.87E-08 GLCC1      | glucocorticoid induced 1                         | Multiple_Complex |
| TC1500009804.hg.1    | 11.2  | 12.48 | -2.42 | 4.17E-09 | 6.87E-08 DENND4A    | DENN/MADD domain containing 4A                   | Multiple_Complex |
| TC2000006561.hg.1    | 7.39  | 8.64  | -2.38 | 4.18E-09 | 6.89E-08 MAVS       | mitochondrial antiviral signaling protein        | Multiple_Complex |
| TC1100011089.hg.1    | 9.78  | 10.94 | -2.24 | 4.21E-09 | 6.92E-08 MTA2       | metastasis associated 1 family member 2          | Multiple_Complex |
| TC1800008285.hg.1    | 8.96  | 10.31 | -2.55 | 4.24E-09 | 6.96E-08 NPC1       | Niemann-Pick disease, type C1                    | Multiple_Complex |
| TC1100013096.hg.1    | 8.76  | 7.36  | 2.66  | 4.30E-09 | 7.06E-08 RBM7       | RNA binding motif protein 7                      | Multiple_Complex |
| TC1200007652.hg.1    | 7.41  | 5.71  | 3.25  | 4.33E-09 | 7.10E-08 GRASP      | GRP1 (general receptor for phosphoinositides     | Multiple_Complex |
| TC1600007441.hg.1    | 11.51 | 10.37 | 2.2   | 4.37E-09 | 7.16E-08 PPP4C      | protein phosphatase 4, catalytic subunit         | Multiple_Complex |
| TC2200007467.hg.1    | 5.33  | 6.72  | -2.63 | 4.37E-09 | 7.17E-08 ZC3H7B     | zinc finger CCH-type containing 7B               | Multiple_Complex |
| TSUnmapped00000801.h | 7.82  | 9.23  | -2.66 | 4.38E-09 | 7.17E-08 VPS11      | VPS11, CORVET/HOPS core subunit [Source:Hi       | Coding           |
| TC2000008200.hg.1    | 6.19  | 7.45  | -2.38 | 4.39E-09 | 7.18E-08 PCED1A     | PC-esterase domain containing 1A                 | Multiple_Complex |
| TC0200007746.hg.1    | 9.97  | 8.59  | 2.6   | 4.39E-09 | 7.18E-08 B3GNT2     | UDP-GlcNAc:betaGal beta-1,3-N-acetylglucose      | Coding           |
| TC1200006503.hg.1    | 6.43  | 7.85  | -2.66 | 4.40E-09 | 7.19E-08 FKBP4      | FK506 binding protein 4                          | Multiple_Complex |
| TC0300009131.hg.1    | 9.97  | 11.14 | -2.26 | 4.42E-09 | 7.22E-08 HPS3       | Hermansky-Pudlak syndrome 3                      | Multiple_Complex |
| TC1000012032.hg.1    | 12.69 | 7.72  | 31.46 | 4.43E-09 | 7.22E-08 RPL21      | ribosomal protein L21                            | Multiple_Complex |
| TC0200010795.hg.1    | 13.33 | 10.48 | 7.23  | 4.47E-09 | 7.28E-08 SLC11A1    | solute carrier family 11 (proton-coupled divale  | Multiple_Complex |
| TC0200016719.hg.1    | 12.85 | 10.69 | 4.45  | 4.51E-09 | 7.34E-08 SNORD89;   | small nucleolar RNA, C/D box 89; ring finger p   | Multiple_Complex |
| TC1300006886.hg.1    | 5.42  | 6.98  | -2.96 | 4.54E-09 | 7.38E-08 RFXAP      | regulatory factor X-associated protein           | Multiple_Complex |
| TC1700011319.hg.1    | 7.27  | 8.55  | -2.44 | 4.60E-09 | 7.48E-08 APPBP2     | amyloid beta precursor protein (cytoplasmic t    | Multiple_Complex |
| TC1900009769.hg.1    | 7.77  | 6.06  | 3.28  | 4.61E-09 | 7.49E-08 STX10      | syntaxin 10                                      | Multiple_Complex |
| TC0900008574.hg.1    | 4.48  | 6.04  | -2.94 | 4.69E-09 | 7.61E-08 TRIM32     | tripartite motif containing 32                   | Coding           |
| TC1900011402.hg.1    | 5.48  | 3.19  | 4.9   | 4.75E-09 | 7.71E-08 RPS9       | Jeck2013 ANTISENSE, CDS, coding, INTERNAL,       | NonCoding        |
| TC1000008908.hg.1    | 12.35 | 11.02 | 2.53  | 4.79E-09 | 7.76E-08 SHOC2      | SHOC2 leucine-rich repeat scaffold protein       | Multiple_Complex |
| TC1700010571.hg.1    | 8.25  | 9.59  | -2.53 | 4.80E-09 | 7.78E-08 MED1       | mediator complex subunit 1                       | Multiple_Complex |

|                      |       |       |       |          |          |                 |                                                                      |                  |
|----------------------|-------|-------|-------|----------|----------|-----------------|----------------------------------------------------------------------|------------------|
| TC0200008534.hg.1    | 8.55  | 10.32 | -3.41 | 4.83E-09 | 7.82E-08 | ANKRD36         | ankyrin repeat domain 36                                             | Multiple_Complex |
| TC0200010021.hg.1    | 17.73 | 15.94 | 3.45  | 4.85E-09 | 7.84E-08 | H3F3AP4; H3F3A  | Homo sapiens H3 histone, family 3A, pseudogen                        | Multiple_Complex |
| TC1900011729.hg.1    | 7.47  | 8.81  | -2.52 | 4.86E-09 | 7.85E-08 | TIMM50          | translocase of inner mitochondrial membrane                          | Multiple_Complex |
| TC0100018567.hg.1    | 9.04  | 7.34  | 3.24  | 4.88E-09 | 7.88E-08 | RBM34           | RNA binding motif protein 34                                         | Multiple_Complex |
| TC0700012165.hg.1    | 6.22  | 8.12  | -3.73 | 4.88E-09 | 7.88E-08 | ATXN7L1         | ataxin 7-like 1                                                      | Multiple_Complex |
| TC1700007700.hg.1    | 7.93  | 9.15  | -2.34 | 4.91E-09 | 7.91E-08 | MRPL45          | mitochondrial ribosomal protein L45                                  | Multiple_Complex |
| TC2000008722.hg.1    | 7.33  | 8.33  | -2    | 4.97E-09 | 8.02E-08 | ACSS1           | acyl-CoA synthetase short-chain family member 1                      | Multiple_Complex |
| TC1600006550.hg.1    | 4.85  | 6.3   | -2.73 | 5.02E-09 | 8.08E-08 | TMEM204         | transmembrane protein 204                                            | Coding           |
| TC0100018476.hg.1    | 6.45  | 7.81  | -2.56 | 5.03E-09 | 8.09E-08 | PEX11B          | peroxisomal biogenesis factor 11 beta                                | Multiple_Complex |
| TC0400009086.hg.1    | 7.5   | 5.18  | 4.98  | 5.12E-09 | 8.23E-08 | GUCY1A3         | guanylate cyclase 1, soluble, alpha 3                                | Multiple_Complex |
| TC0700008597.hg.1    | 11.1  | 9.44  | 3.16  | 5.20E-09 | 8.35E-08 | CUX1            | cut-like homeobox 1                                                  | Multiple_Complex |
| TC2200007791.hg.1    | 7.93  | 6.75  | 2.28  | 5.23E-09 | 8.40E-08 | TRABD           | Transcript Identified by AceView, Entrez Gene                        | Unassigned       |
| TC1300008793.hg.1    | 10.36 | 7.85  | 5.67  | 5.24E-09 | 8.41E-08 | TSC22D1         | TSC22 domain family, member 1                                        | Multiple_Complex |
| TC1500006870.hg.1    | 5.64  | 7.05  | -2.67 | 5.25E-09 | 8.41E-08 | C15orf41        | chromosome 15 open reading frame 41                                  | Multiple_Complex |
| TC0200016626.hg.1    | 11.8  | 9.3   | 5.68  | 5.29E-09 | 8.47E-08 | MBOAT2          | membrane bound O-acyltransferase domain containing 2                 | Multiple_Complex |
| TC0300012924.hg.1    | 7.96  | 5.92  | 4.11  | 5.31E-09 | 8.49E-08 | VEPH1           | ventricular zone expressed PH domain containing 1                    | Multiple_Complex |
| TC0900010925.hg.1    | 4.53  | 5.82  | -2.45 | 5.31E-09 | 8.49E-08 | ZNF782          | zinc finger protein 782                                              | Multiple_Complex |
| TC1200008629.hg.1    | 9.64  | 7.84  | 3.49  | 5.36E-09 | 8.56E-08 | DRAM1           | DNA-damage regulated autophagy modulator 1                           | Multiple_Complex |
| TC1000011948.hg.1    | 11.96 | 9.9   | 4.18  | 5.37E-09 | 8.58E-08 | PDZD8           | PDZ domain containing 8                                              | Multiple_Complex |
| TC0400011712.hg.1    | 9.42  | 6.45  | 7.82  | 5.38E-09 | 8.59E-08 | PDE5A           | phosphodiesterase 5A, cGMP-specific                                  | Multiple_Complex |
| TC0500010894.hg.1    | 6.6   | 7.83  | -2.35 | 5.43E-09 | 8.66E-08 | DIMT1           | DIM1 dimethyladenosine transferase 1 homolog                         | Multiple_Complex |
| TC1200007826.hg.1    | 14.89 | 10.32 | 23.8  | 5.47E-09 | 8.71E-08 | RPL41           | ribosomal protein L41                                                | Multiple_Complex |
| TC0600014374.hg.1    | 7.73  | 9.29  | -2.95 | 5.51E-09 | 8.78E-08 | PHF10           | PHD finger protein 10                                                | Multiple_Complex |
| TC1700007976.hg.1    | 6.89  | 8.39  | -2.82 | 5.54E-09 | 8.82E-08 | G6PC3           | glucose 6 phosphatase, catalytic, 3                                  | Multiple_Complex |
| TC0300007165.hg.1    | 11.41 | 13.16 | -3.36 | 5.59E-09 | 8.89E-08 | NKTR            | natural killer cell triggering receptor                              | Multiple_Complex |
| TC0100015577.hg.1    | 6.41  | 7.95  | -2.91 | 5.61E-09 | 8.91E-08 | PPIAL4F; PPIAL4 | peptidylprolyl isomerase A (cyclophilin A)-like                      | Coding           |
| TC2100007336.hg.1    | 10.63 | 11.88 | -2.38 | 5.63E-09 | 8.94E-08 | TRAPPC10        | trafficking protein particle complex 10                              | Multiple_Complex |
| TC1900007917.hg.1    | 7.01  | 8.33  | -2.49 | 5.77E-09 | 9.15E-08 | ZNF146          | zinc finger protein 146                                              | Multiple_Complex |
| TC2000006916.hg.1    | 12.26 | 7.88  | 20.79 | 5.87E-09 | 9.31E-08 | RPL41P1         | ribosomal protein L41 pseudogene 1                                   | Multiple_Complex |
| TC1600008166.hg.1    | 7.34  | 8.77  | -2.69 | 5.92E-09 | 9.37E-08 | CTCF            | CCCTC-binding factor (zinc finger protein)                           | Multiple_Complex |
| TC1200011936.hg.1    | 7.66  | 9.53  | -3.65 | 5.95E-09 | 9.42E-08 | ATXN2           | ataxin 2                                                             | Multiple_Complex |
| TC1900010863.hg.1    | 4.95  | 6.21  | -2.41 | 5.97E-09 | 9.44E-08 | SMG9            | SMG9 nonsense mediated mRNA decay factor                             | Multiple_Complex |
| TC2000007514.hg.1    | 15.15 | 10    | 35.56 | 6.05E-09 | 9.56E-08 | MMP9            | matrix metalloproteinase 9                                           | Multiple_Complex |
| TC1400009538.hg.1    | 9.57  | 10.94 | -2.58 | 6.07E-09 | 9.59E-08 | DCAF5           | DDB1 and CUL4 associated factor 5                                    | Multiple_Complex |
| TC0100011105.hg.1    | 18.21 | 19.27 | -2.09 | 6.08E-09 | 9.59E-08 | PTPRC           | protein tyrosine phosphatase, receptor type, class C, member 2       | Multiple_Complex |
| TC0700012701.hg.1    | 7.55  | 9.09  | -2.92 | 6.11E-09 | 9.64E-08 | CNOT4           | CCR4-NOT transcription complex subunit 4                             | Multiple_Complex |
| TC1400006691.hg.1    | 9.65  | 11.43 | -3.44 | 6.24E-09 | 9.83E-08 | THTPA           | thiamine triphosphatase                                              | Multiple_Complex |
| TC0100015715.hg.1    | 10.55 | 12.11 | -2.95 | 6.25E-09 | 9.84E-08 | SF3B4           | splicing factor 3b, subunit 4, 49kDa                                 | Multiple_Complex |
| TC0500008705.hg.1    | 6.39  | 7.95  | -2.95 | 6.30E-09 | 9.91E-08 | TXNDC15         | thioredoxin domain containing 15                                     | Multiple_Complex |
| TC1500009623.hg.1    | 10.73 | 8.9   | 3.55  | 6.34E-09 | 9.96E-08 | BNIP2           | BCL2/adenovirus E1B 19kDa interacting protein 2                      | Multiple_Complex |
| TC1500008023.hg.1    | 12.82 | 10.7  | 4.34  | 6.40E-09 | 1.00E-07 | ZFAND6          | zinc finger, AN1-type domain 6                                       | Multiple_Complex |
| TC0500013355.hg.1    | 6.28  | 4.88  | 2.63  | 6.48E-09 | 1.02E-07 | P4HA2           | prolyl 4-hydroxylase, alpha polypeptide II                           | NonCoding        |
| TC0400008213.hg.1    | 4.77  | 6.07  | -2.46 | 6.50E-09 | 1.02E-07 | RAP1GDS1        | RAP1, GTP-GDP dissociation stimulator 1                              | Multiple_Complex |
| TC2100008384.hg.1    | 7.52  | 8.72  | -2.3  | 6.54E-09 | 1.03E-07 | UBE2G2          | ubiquitin conjugating enzyme E2G 2                                   | Multiple_Complex |
| TC1300006989.hg.1    | 7.05  | 8.88  | -3.56 | 6.55E-09 | 1.03E-07 | AKAP11          | A kinase (PRKA) anchor protein 11                                    | Multiple_Complex |
| TC0200014990.hg.1    | 12.31 | 9.83  | 5.55  | 6.56E-09 | 1.03E-07 | CIR1            | corepressor interacting with RBPJ, 1                                 | Multiple_Complex |
| TC0200016474.hg.1    | 11.7  | 14.12 | -5.37 | 6.57E-09 | 1.03E-07 | NAGK            | N-acetylglucosamine kinase                                           | Multiple_Complex |
| TC0400011283.hg.1    | 7.72  | 9.37  | -3.12 | 6.60E-09 | 1.03E-07 | PPM1K           | protein phosphatase, Mg2+/Mn2+ dependent                             | Multiple_Complex |
| TC0400012634.hg.1    | 7.73  | 9.51  | -3.45 | 6.62E-09 | 1.03E-07 | CFAP97          | cilia and flagella associated protein 97                             | Multiple_Complex |
| TC0800007976.hg.1    | 9.53  | 8.62  | 1.88  | 6.67E-09 | 1.04E-07 | TMEM70; TMEM70  | transmembrane protein 70; ribosomal protein                          | Multiple_Complex |
| TC0100013924.hg.1    | 9.33  | 10.37 | -2.05 | 6.71E-09 | 1.05E-07 | ELOVL1; ELOVL1  | ELOVL fatty acid elongase 1; microRNA 6734                           | Multiple_Complex |
| TC1400009016.hg.1    | 8.03  | 6.52  | 2.85  | 6.74E-09 | 1.05E-07 | FBXO33          | F-box protein 33                                                     | Multiple_Complex |
| TC0100018437.hg.1    | 9.87  | 8.46  | 2.67  | 6.82E-09 | 1.06E-07 | MKNK1           | MAP kinase interacting serine/threonine kinase                       | Multiple_Complex |
| TC0900011453.hg.1    | 5.18  | 6.59  | -2.66 | 6.83E-09 | 1.06E-07 | ZBTB6           | zinc finger and BTB domain containing 6                              | Coding           |
| TC0700009677.hg.1    | 8.8   | 11.34 | -5.79 | 6.93E-09 | 1.08E-07 | GIMAP4          | GTPase, IMAP family member 4                                         | Multiple_Complex |
| TC1200009131.hg.1    | 8.48  | 10.23 | -3.35 | 6.96E-09 | 1.08E-07 | DYNLL1          | dynein, light chain, LC8-type 1                                      | Multiple_Complex |
| TC0900006526.hg.1    | 6.12  | 7.26  | -2.2  | 7.02E-09 | 1.09E-07 | PLPP6           | phospholipid phosphatase 6                                           | Coding           |
| TC1100013144.hg.1    | 6.5   | 7.73  | -2.35 | 7.08E-09 | 1.10E-07 | ZBED5           | zinc finger, BED-type containing 5                                   | Multiple_Complex |
| TC1900007456.hg.1    | 8.74  | 9.81  | -2.1  | 7.12E-09 | 1.10E-07 | ZNF253          | zinc finger protein 253                                              | Multiple_Complex |
| TC1200009461.hg.1    | 7.06  | 9.3   | -4.71 | 7.15E-09 | 1.11E-07 | EP400; SNRPC    | E1A binding protein p400; small nucleolar ribonucleoprotein          | Multiple_Complex |
| TC1600008454.hg.1    | 9.91  | 8.23  | 3.21  | 7.15E-09 | 1.11E-07 | GABARAPL1       | GABA(A) receptor-associated protein like 2                           | Multiple_Complex |
| TC1200012760.hg.1    | 5.19  | 6.82  | -3.09 | 7.19E-09 | 1.11E-07 | PRR4            | proline rich 4 (lacrimal)                                            | Multiple_Complex |
| TSUnmapped00000194.h | 6.24  | 7.16  | -1.89 | 7.20E-09 | 1.11E-07 | INPP5D          | inositol polyphosphate-5-phosphatase D                               | NonCoding        |
| TC2100008561.hg.1    | 10.19 | 7.07  | 8.71  | 7.22E-09 | 1.12E-07 | ATP5O           | ATP synthase, H+ transporting, mitochondrial F1F0 complex, c subunit | Multiple_Complex |
| TC0X00008514.hg.1    | 6.67  | 8.23  | -2.95 | 7.27E-09 | 1.12E-07 | DDX26B          | DEAD/H (Asp-Glu-Ala-Asp/His) box polypeptide                         | Multiple_Complex |
| TC1200009846.hg.1    | 6.59  | 8.84  | -4.76 | 7.28E-09 | 1.12E-07 | LINC00612       | long intergenic non-protein coding RNA 612                           | Multiple_Complex |
| TC1800007680.hg.1    | 10.45 | 11.72 | -2.4  | 7.31E-09 | 1.13E-07 | CNDP2           | CNDP dipeptidase 2 (metalloproteinase M20 family)                    | Multiple_Complex |
| TC0X00010097.hg.1    | 9.48  | 8.03  | 2.74  | 7.34E-09 | 1.13E-07 | RLIM            | ring finger protein, LIM domain interacting                          | Multiple_Complex |
| TC1600008865.hg.1    | 7.05  | 8.01  | -1.95 | 7.35E-09 | 1.13E-07 | ACSF3           | acyl-CoA synthetase family member 3                                  | Multiple_Complex |
| TC0300009357.hg.1    | 8.08  | 5.93  | 4.44  | 7.37E-09 | 1.13E-07 | NMD3            | NMD3 ribosome export adaptor                                         | Multiple_Complex |



|                      |       |       |        |          |          |            |                                                  |                  |
|----------------------|-------|-------|--------|----------|----------|------------|--------------------------------------------------|------------------|
| TC0600013603.hg.1    | 8.03  | 6.09  | 3.82   | 7.40E-09 | 1.14E-07 | MTRF1L     | mitochondrial translational release factor 1-lik | Multiple_Complex |
| TC0400011643.hg.1    | 8.84  | 10.25 | -2.66  | 7.49E-09 | 1.15E-07 | CAMK2D     | calcium/calmodulin-dependent protein kinase      | Multiple_Complex |
| TC0600014102.hg.1    | 10.21 | 11.8  | -3.01  | 7.49E-09 | 1.15E-07 | HCP5       | HLA complex P5 (non-protein coding)              | Multiple_Complex |
| TC0400010230.hg.1    | 15.85 | 14.64 | 2.32   | 7.60E-09 | 1.17E-07 | GBA3       | Jeck2013 ANTISENSE, coding, INTERNAL, intro      | Multiple_Complex |
| TC0100018465.hg.1    | 8.92  | 7.47  | 2.73   | 7.69E-09 | 1.18E-07 | BCAS2      | breast carcinoma amplified sequence 2            | Multiple_Complex |
| TC0200010448.hg.1    | 10.28 | 14.9  | -24.53 | 7.93E-09 | 1.21E-07 | STRADB     | STE20-related kinase adaptor beta                | Multiple_Complex |
| TC0900007489.hg.1    | 6.97  | 8.29  | -2.51  | 7.97E-09 | 1.22E-07 | FAM122A    | family with sequence similarity 122A             | Coding           |
| TC0700009292.hg.1    | 14.04 | 10.06 | 15.79  | 8.10E-09 | 1.24E-07 | RPL41      | Synthetic construct Homo sapiens clone IMAG      | Coding           |
| TC1900011795.hg.1    | 10.96 | 12.48 | -2.88  | 8.11E-09 | 1.24E-07 | NDUFA3     | NADH dehydrogenase (ubiquinone) 1 alpha su       | Multiple_Complex |
| TC1900009128.hg.1    | 7.56  | 8.96  | -2.64  | 8.14E-09 | 1.24E-07 | TMEM259    | transmembrane protein 259                        | Multiple_Complex |
| TC0300012208.hg.1    | 9.16  | 10.97 | -3.52  | 8.17E-09 | 1.25E-07 | HACD2      | 3-hydroxyacyl-CoA dehydratase 2                  | Multiple_Complex |
| TC0500010019.hg.1    | 5.03  | 6.33  | -2.46  | 8.24E-09 | 1.26E-07 | FASTKD3    | FAST kinase domains 3                            | Multiple_Complex |
| TC0300013954.hg.1    | 5.28  | 4.04  | 2.36   | 8.28E-09 | 1.26E-07 | ZNF385D    | zinc finger protein 385D                         | Multiple_Complex |
| TC1000008651.hg.1    | 7.79  | 8.94  | -2.21  | 8.39E-09 | 1.28E-07 | HIF1AN     | hypoxia inducible factor 1, alpha subunit inhib  | Multiple_Complex |
| TSUnmapped00000463.h | 6.92  | 5.36  | 2.95   | 8.40E-09 | 1.28E-07 | RPS25      | ribosomal protein S25                            | NonCoding        |
| TC1100009880.hg.1    | 8.84  | 10.56 | -3.28  | 8.42E-09 | 1.28E-07 | TRIM21     | tripartite motif containing 21                   | Coding           |
| TC0X00011305.hg.1    | 7.86  | 10.35 | -5.63  | 8.44E-09 | 1.28E-07 | NHSL2      | NHS-like 2                                       | Multiple_Complex |
| TC1600010951.hg.1    | 5.88  | 7.49  | -3.03  | 8.45E-09 | 1.28E-07 | MAF        | v-maf avian musculoaponeurotic fibrosarcom:      | Coding           |
| TC1000011549.hg.1    | 6.66  | 5.51  | 2.22   | 8.71E-09 | 1.32E-07 | RRP12      | Memczak2013 ALT_ACCEPTOR, ALT_DONOR,             | NonCoding        |
| TC0200016360.hg.1    | 6.39  | 7.77  | -2.61  | 8.72E-09 | 1.32E-07 | STK25      | serine/threonine kinase 25                       | Multiple_Complex |
| TC1200010516.hg.1    | 12.04 | 14.47 | -5.39  | 8.76E-09 | 1.33E-07 | SLC38A1    | solute carrier family 38, member 1               | Multiple_Complex |
| TC0600012883.hg.1    | 6.52  | 8.01  | -2.81  | 9.03E-09 | 1.37E-07 | TUBE1      | tubulin, epsilon 1                               | Multiple_Complex |
| TC1800006710.hg.1    | 11.8  | 10.38 | 2.67   | 9.09E-09 | 1.38E-07 | CHMP1B     | charged multivesicular body protein 1B           | Multiple_Complex |
| TC0X00008080.hg.1    | 6.44  | 8.55  | -4.33  | 9.09E-09 | 1.38E-07 | VSIG1      | V-set and immunoglobulin domain containing       | Multiple_Complex |
| TC1100007139.hg.1    | 6.38  | 7.9   | -2.87  | 9.23E-09 | 1.39E-07 | METTL15    | methyltransferase like 15                        | Multiple_Complex |
| TC0800012211.hg.1    | 5.7   | 7.06  | -2.56  | 9.70E-09 | 1.47E-07 | CPSF1; MIR | cleavage and polyadenylation specific factor 1   | Multiple_Complex |
| TC1700009681.hg.1    | 8.47  | 9.86  | -2.62  | 9.76E-09 | 1.47E-07 | CTC1       | CTS telomere maintenance complex compone         | Multiple_Complex |
| TC0200009189.hg.1    | 9.38  | 13.77 | -20.93 | 9.85E-09 | 1.49E-07 | GYPC       | glycophorin C (Gerbich blood group)              | Multiple_Complex |
| TC0X00010895.hg.1    | 5.9   | 7.05  | -2.22  | 9.94E-09 | 1.50E-07 | ZNF75D     | zinc finger protein 75D                          | Multiple_Complex |
| TC0700009056.hg.1    | 7     | 6.11  | 1.86   | 9.98E-09 | 1.50E-07 | FAM71F2    | family with sequence similarity 71, member F:    | Multiple_Complex |
| TC0100010185.hg.1    | 7.41  | 8.61  | -2.3   | 1.00E-08 | 1.51E-07 | APOA1BP    | apolipoprotein A-I binding protein               | Multiple_Complex |
| TC1000009880.hg.1    | 6.9   | 8.72  | -3.53  | 1.00E-08 | 1.51E-07 | NMT2       | N-myristoyltransferase 2                         | Multiple_Complex |
| TC0100015596.hg.1    | 6.77  | 8.25  | -2.78  | 1.01E-08 | 1.51E-07 | LIX1L      | limb and CNS expressed 1 like                    | Multiple_Complex |
| TC1200007630.hg.1    | 6.36  | 7.49  | -2.19  | 1.01E-08 | 1.51E-07 | LETMD1     | LETM1 domain containing 1                        | Multiple_Complex |
| TC0600010331.hg.1    | 4.63  | 6.07  | -2.72  | 1.03E-08 | 1.55E-07 | FAM120B    | family with sequence similarity 120B             | Multiple_Complex |
| TC1700012431.hg.1    | 4.11  | 5.1   | -2     | 1.04E-08 | 1.55E-07 | HOXB2      | homeobox B2                                      | Multiple_Complex |
| TC0100014650.hg.1    | 7.04  | 8.55  | -2.83  | 1.04E-08 | 1.56E-07 | ZZZ3       | zinc finger, ZZ-type containing 3                | Multiple_Complex |
| TC0300012007.hg.1    | 3.94  | 5.82  | -3.67  | 1.04E-08 | 1.56E-07 | CD200R1    | CD200 receptor 1                                 | Coding           |
| TC1900007963.hg.1    | 6.56  | 8.34  | -3.44  | 1.04E-08 | 1.56E-07 | ZNF383     | zinc finger protein 383                          | Multiple_Complex |
| TC0500010932.hg.1    | 9.98  | 8.51  | 2.78   | 1.05E-08 | 1.56E-07 | SGTB       | small glutamine-rich tetratricopeptide repeat    | Multiple_Complex |
| TC0900011378.hg.1    | 8.94  | 7.01  | 3.8    | 1.07E-08 | 1.59E-07 | CDK5RAP2   | CDK5 regulatory subunit associated protein 2     | Multiple_Complex |
| TC1200010927.hg.1    | 13.6  | 14.46 | -1.82  | 1.07E-08 | 1.60E-07 | ATP5B      | ATP synthase, H+ transporting, mitochondrial     | Multiple_Complex |
| TC0200012256.hg.1    | 7.91  | 9.24  | -2.52  | 1.07E-08 | 1.60E-07 | HEATR5B    | HEAT repeat containing 5B                        | Multiple_Complex |
| TC0400006793.hg.1    | 6.04  | 4.27  | 3.41   | 1.08E-08 | 1.61E-07 | USP17L15   | ubiquitin specific peptidase 17-like family mer  | Coding           |
| TC0600013531.hg.1    | 5.94  | 7.29  | -2.56  | 1.09E-08 | 1.62E-07 | NUP43      | nucleoporin 43kDa                                | Multiple_Complex |
| TC0300006968.hg.1    | 9.53  | 11.02 | -2.83  | 1.09E-08 | 1.62E-07 | CMTM7      | CKLF-like MARVEL transmembrane domain co         | Multiple_Complex |
| TC0800006983.hg.1    | 8.88  | 10.27 | -2.64  | 1.10E-08 | 1.64E-07 | PPP3CC     | protein phosphatase 3, catalytic subunit, gami   | Multiple_Complex |
| TC0X00007148.hg.1    | 10.79 | 12.2  | -2.65  | 1.12E-08 | 1.66E-07 | ARAF       | A-Raf proto-oncogene, serine/threonine kinas     | Multiple_Complex |
| TC1400009123.hg.1    | 10.97 | 8.95  | 4.05   | 1.12E-08 | 1.67E-07 | SOS2       | SOS Ras/Rho guanine nucleotide exchange fac      | Multiple_Complex |
| TC0100010075.hg.1    | 7.56  | 8.86  | -2.46  | 1.12E-08 | 1.67E-07 | ATP8B2     | ATPase, aminophospholipid transporter, class     | Multiple_Complex |
| TC0500009076.hg.1    | 5.26  | 6.46  | -2.3   | 1.13E-08 | 1.68E-07 | SLC26A2    | solute carrier family 26 (anion exchanger), me   | Multiple_Complex |
| TC0900012024.hg.1    | 5.09  | 7.11  | -4.04  | 1.16E-08 | 1.71E-07 | CLIC3      | chloride intracellular channel 3                 | Multiple_Complex |
| TC1200008678.hg.1    | 7.15  | 5.43  | 3.29   | 1.16E-08 | 1.72E-07 | EID3       | EP300 interacting inhibitor of differentiation 3 | Coding           |
| TC2000009469.hg.1    | 5.38  | 6.68  | -2.46  | 1.17E-08 | 1.73E-07 | ZFP64      | ZFP64 zinc finger protein                        | Multiple_Complex |
| TC2100007597.hg.1    | 8.39  | 7.13  | 2.39   | 1.18E-08 | 1.75E-07 | HSPA13     | heat shock protein 70kDa family, member 13       | Multiple_Complex |
| TC1100007003.hg.1    | 13.38 | 11.54 | 3.57   | 1.20E-08 | 1.78E-07 | LDHA       | lactate dehydrogenase A                          | Multiple_Complex |
| TC0300011158.hg.1    | 11.46 | 12.5  | -2.06  | 1.21E-08 | 1.79E-07 | WDR82      | WD repeat domain 82                              | Multiple_Complex |
| TC0600009710.hg.1    | 12.32 | 10.82 | 2.82   | 1.22E-08 | 1.81E-07 | STX11      | syntaxin 11                                      | Coding           |
| TC0500009061.hg.1    | 5.48  | 6.51  | -2.05  | 1.23E-08 | 1.82E-07 | PCYOX1L    | prenylcysteine oxidase 1 like                    | Multiple_Complex |
| TC0200008655.hg.1    | 11.55 | 10.14 | 2.66   | 1.27E-08 | 1.87E-07 | MAP4K4     | mitogen-activated protein kinase kinase kinas    | Multiple_Complex |
| TC1600006926.hg.1    | 8.7   | 7.34  | 2.57   | 1.29E-08 | 1.90E-07 | SNN        | stannin                                          | Coding           |
| TC1900010951.hg.1    | 6.69  | 5.36  | 2.51   | 1.32E-08 | 1.95E-07 | SNRPD2     | small nuclear ribonucleoprotein D2 polypeptic    | Multiple_Complex |
| TC1200009735.hg.1    | 8.53  | 5.59  | 7.69   | 1.33E-08 | 1.95E-07 | MRPL51     | mitochondrial ribosomal protein L51              | Multiple_Complex |
| TC0800008726.hg.1    | 7.56  | 8.92  | -2.57  | 1.33E-08 | 1.95E-07 | TBC1D31    | TBC1 domain family, member 31                    | Multiple_Complex |
| TC0200015608.hg.1    | 5.47  | 7.02  | -2.93  | 1.33E-08 | 1.96E-07 | LANCL1     | LanC lantibiotic synthetase component C-like     | Multiple_Complex |
| TC0X00007529.hg.1    | 9.33  | 7.37  | 3.91   | 1.34E-08 | 1.96E-07 | IGBP1      | immunoglobulin (CD79A) binding component 1       | Multiple_Complex |
| TC1900011817.hg.1    | 4.85  | 6.57  | -3.29  | 1.34E-08 | 1.97E-07 | ZNF773     | zinc finger protein 773                          | Multiple_Complex |
| TC0500009478.hg.1    | 6.3   | 4.87  | 2.7    | 1.34E-08 | 1.97E-07 | RPL26L1    | ribosomal protein L26-like 1                     | Coding           |
| TC1500007645.hg.1    | 4.7   | 6.62  | -3.79  | 1.37E-08 | 2.01E-07 | MAP2K5     | mitogen-activated protein kinase kinase 5        | Multiple_Complex |
| TC1100013062.hg.1    | 4.93  | 6.28  | -2.55  | 1.39E-08 | 2.03E-07 | NADSYN1    | NAD synthetase 1                                 | Multiple_Complex |

|                      |       |       |        |          |          |            |                                                 |                  |
|----------------------|-------|-------|--------|----------|----------|------------|-------------------------------------------------|------------------|
| TC0200008452.hg.1    | 6.51  | 8.99  | -5.58  | 1.39E-08 | 2.04E-07 | MAL        | mal, T-cell differentiation protein             | Multiple_Complex |
| TC1200010633.hg.1    | 7.19  | 8.51  | -2.5   | 1.40E-08 | 2.04E-07 | MCRS1      | microspherule protein 1                         | Multiple_Complex |
| TC0600007792.hg.1    | 6.37  | 7.76  | -2.62  | 1.40E-08 | 2.05E-07 | PPARD      | peroxisome proliferator-activated receptor de   | Multiple_Complex |
| TC0200007785.hg.1    | 9.26  | 8.17  | 2.13   | 1.41E-08 | 2.05E-07 | UGP2       | UDP-glucose pyrophosphorylase 2                 | Multiple_Complex |
| TC1000007176.hg.1    | 11.41 | 9.79  | 3.07   | 1.42E-08 | 2.07E-07 | MAP3K8     | mitogen-activated protein kinase kinase kinas   | Multiple_Complex |
| TC0200011080.hg.1    | 7     | 8.74  | -3.35  | 1.42E-08 | 2.08E-07 | COPS7B     | COP9 signalosome subunit 7B                     | Multiple_Complex |
| TC1900006488.hg.1    | 11.17 | 12.73 | -2.96  | 1.44E-08 | 2.10E-07 | PTBP1; MIF | polypyrimidine tract binding protein 1; microF  | Multiple_Complex |
| TC0600012413.hg.1    | 9.11  | 10.44 | -2.51  | 1.44E-08 | 2.10E-07 | IBTK       | inhibitor of Bruton agammaglobulinemia tyros    | Multiple_Complex |
| TC0100007406.hg.1    | 8.54  | 10.44 | -3.73  | 1.45E-08 | 2.11E-07 | LDLRAP1    | low density lipoprotein receptor adaptor proti  | Multiple_Complex |
| TC0700013397.hg.1    | 9.44  | 7.72  | 3.29   | 1.46E-08 | 2.13E-07 | CDK14      | cyclin-dependent kinase 14                      | Multiple_Complex |
| TC0200015226.hg.1    | 5.56  | 7.03  | -2.77  | 1.48E-08 | 2.15E-07 | HIBCH      | Transcript Identified by AceView, Entrez Gene   | Unassigned       |
| TC0X00008829.hg.1    | 16.92 | 18.79 | -3.65  | 1.48E-08 | 2.15E-07 | RPL10; SNC | ribosomal protein L10; small nucleolar RNA, H   | Multiple_Complex |
| TC0700010510.hg.1    | 6.74  | 8.19  | -2.73  | 1.48E-08 | 2.15E-07 | C7orf31    | chromosome 7 open reading frame 31              | Multiple_Complex |
| TC0100016917.hg.1    | 6.86  | 8.24  | -2.6   | 1.49E-08 | 2.16E-07 | CSRP1      | cysteine and glycine-rich protein 1             | Multiple_Complex |
| TC0600010864.hg.1    | 10.59 | 9.43  | 2.24   | 1.50E-08 | 2.17E-07 | RANBP9     | RAN binding protein 9                           | Multiple_Complex |
| TC0800007435.hg.1    | 7.17  | 8.28  | -2.17  | 1.54E-08 | 2.23E-07 | IKBK       | inhibitor of kappa light polypeptide gene enh   | Multiple_Complex |
| TC1500008521.hg.1    | 13.08 | 11.93 | 2.23   | 1.57E-08 | 2.27E-07 | MEF2A      | myocyte enhancer factor 2A                      | Multiple_Complex |
| TC0300009306.hg.1    | 8.87  | 6.94  | 3.81   | 1.57E-08 | 2.27E-07 | RSRC1      | arginine/serine-rich coiled-coil 1              | Multiple_Complex |
| TC2200009180.hg.1    | 6.95  | 8.21  | -2.4   | 1.59E-08 | 2.30E-07 | RABL2B     | RAB, member of RAS oncogene family-like 2B      | Multiple_Complex |
| TC0200015246.hg.1    | 8.61  | 10.69 | -4.21  | 1.59E-08 | 2.30E-07 | STAT4      | signal transducer and activator of transcrip    | Multiple_Complex |
| TC0500013271.hg.1    | 8.41  | 9.81  | -2.63  | 1.60E-08 | 2.31E-07 | LOC728554  | THO complex 3 pseudogene; Homo sapiens TH       | Multiple_Complex |
| TC0100016137.hg.1    | 7.75  | 9.46  | -3.27  | 1.60E-08 | 2.31E-07 | CD84       | CD84 molecule                                   | Multiple_Complex |
| TC0100007268.hg.1    | 16.39 | 15.21 | 2.27   | 1.61E-08 | 2.33E-07 | CDC42      | cell division cycle 42                          | Multiple_Complex |
| TC2200009328.hg.1    | 6.99  | 8.16  | -2.25  | 1.61E-08 | 2.33E-07 | HPS4       | Hermansky-Pudlak syndrome 4                     | Multiple_Complex |
| TC1700012185.hg.1    | 3.93  | 5.53  | -3.03  | 1.63E-08 | 2.34E-07 | TNFSF12    | tumor necrosis factor (ligand) superfamily, me  | Multiple_Complex |
| TC1100011535.hg.1    | 3.55  | 4.72  | -2.24  | 1.67E-08 | 2.41E-07 | LOC100133  | transient receptor potential cation channel, su | Multiple_Complex |
| TC1300009583.hg.1    | 5.69  | 6.94  | -2.39  | 1.68E-08 | 2.41E-07 | DOCK9      | dedicator of cytokinesis 9                      | Multiple_Complex |
| TC1600010734.hg.1    | 6.15  | 7.54  | -2.61  | 1.68E-08 | 2.41E-07 | NOB1       | NIN1/RPN12 binding protein 1 homolog            | Multiple_Complex |
| TC1100008008.hg.1    | 5.53  | 7.05  | -2.87  | 1.68E-08 | 2.41E-07 | POLA2      | polymerase (DNA directed), alpha 2, accessio    | Multiple_Complex |
| TC0300009459.hg.1    | 10.6  | 8.88  | 3.29   | 1.68E-08 | 2.41E-07 | GPR160     | G protein-coupled receptor 160                  | Multiple_Complex |
| TC0600012040.hg.1    | 8.33  | 9.36  | -2.04  | 1.69E-08 | 2.43E-07 | TRAM2      | translocation associated membrane protein 2     | Multiple_Complex |
| TC1700006717.hg.1    | 8.67  | 6.73  | 3.86   | 1.70E-08 | 2.44E-07 | ALOX12     | arachidonate 12-lipoxygenase                    | Multiple_Complex |
| TC0X00010836.hg.1    | 11.96 | 10.29 | 3.19   | 1.71E-08 | 2.46E-07 | RAP2C      | RAP2C, member of RAS oncogene family            | Multiple_Complex |
| TSUnmapped00000319.h | 5.44  | 4.52  | 1.89   | 1.72E-08 | 2.46E-07 | NDUFA6     | NADH dehydrogenase (ubiquinone) 1 alpha su      | Coding           |
| TC0800006969.hg.1    | 7.44  | 11.08 | -12.45 | 1.72E-08 | 2.46E-07 | DMTN       | dematin actin binding protein                   | Multiple_Complex |
| TC0X00011221.hg.1    | 9.51  | 10.83 | -2.5   | 1.73E-08 | 2.48E-07 | GAB3       | GRB2-associated binding protein 3               | Multiple_Complex |
| TC1300008388.hg.1    | 9.37  | 7.18  | 4.57   | 1.78E-08 | 2.55E-07 | MTMR6      | Transcript Identified by AceView, Entrez Gene   | Unassigned       |
| TC0700010453.hg.1    | 8.78  | 6.45  | 5.01   | 1.79E-08 | 2.56E-07 | TOMM7      | translocase of outer mitochondrial membrane     | Multiple_Complex |
| TC1700007042.hg.1    | 9.85  | 11.35 | -2.82  | 1.82E-08 | 2.59E-07 | MPRI       | myosin phosphatase Rho interacting protein      | Multiple_Complex |
| TC0400007609.hg.1    | 7.95  | 9.29  | -2.54  | 1.82E-08 | 2.60E-07 | REST       | RE1-silencing transcription factor              | Multiple_Complex |
| TC1900011854.hg.1    | 8.04  | 9.46  | -2.68  | 1.82E-08 | 2.60E-07 | ELAVL1     | ELAV like RNA binding protein 1                 | Multiple_Complex |
| TC0800011285.hg.1    | 8.99  | 10.21 | -2.32  | 1.83E-08 | 2.60E-07 | ZNF706     | zinc finger protein 706                         | Multiple_Complex |
| TC0200007458.hg.1    | 7.48  | 6.54  | 1.92   | 1.83E-08 | 2.60E-07 | EPAS1      | endothelial PAS domain protein 1                | Multiple_Complex |
| TC2200007894.hg.1    | 9.98  | 12.81 | -7.11  | 1.83E-08 | 2.61E-07 | CECR1      | cat eye syndrome chromosome region, candic      | Multiple_Complex |
| TC1200006454.hg.1    | 6.4   | 8.25  | -3.58  | 1.85E-08 | 2.63E-07 | WNK1       | Transcript Identified by AceView, Entrez Gene   | Unassigned       |
| TC0400012222.hg.1    | 5.8   | 4.21  | 3.01   | 1.86E-08 | 2.64E-07 | PDGFC      | platelet derived growth factor C                | Multiple_Complex |
| TC0600012038.hg.1    | 5.04  | 6.27  | -2.34  | 1.88E-08 | 2.67E-07 | MCM3       | minichromosome maintenance complex comp         | Multiple_Complex |
| TC1000007020.hg.1    | 9.33  | 7.98  | 2.55   | 1.89E-08 | 2.69E-07 | OTUD1      | OTU deubiquitinase 1                            | Coding           |
| TC1400010596.hg.1    | 10.83 | 8.4   | 5.39   | 1.92E-08 | 2.72E-07 | PSMA6      | proteasome subunit alpha 6                      | Multiple_Complex |
| TC0900010580.hg.1    | 7.21  | 5.41  | 3.47   | 1.92E-08 | 2.72E-07 | GKAP1      | G kinase anchoring protein 1                    | Multiple_Complex |
| TC0700006562.hg.1    | 6.8   | 8.25  | -2.74  | 1.92E-08 | 2.72E-07 | LFNG; MIR4 | LFNG O-fucosylpeptide 3-beta-N-acetylglucos     | Multiple_Complex |
| TC1600011527.hg.1    | 10.96 | 12.41 | -2.74  | 1.93E-08 | 2.73E-07 | VKORC1     | vitamin K epoxide reductase complex subunit     | Multiple_Complex |
| TC0700009647.hg.1    | 5.43  | 6.58  | -2.22  | 1.93E-08 | 2.73E-07 | ZNF862     | zinc finger protein 862                         | Multiple_Complex |
| TC1900008121.hg.1    | 9.2   | 10.44 | -2.37  | 1.93E-08 | 2.73E-07 | SNRPA      | small nuclear ribonucleoprotein polypeptide A   | Multiple_Complex |
| TC0100016476.hg.1    | 10.69 | 13.12 | -5.41  | 1.94E-08 | 2.74E-07 | KIAA0040   | KIAA0040                                        | Multiple_Complex |
| TC1700008232.hg.1    | 6.99  | 8.87  | -3.69  | 1.94E-08 | 2.74E-07 | PDK2       | pyruvate dehydrogenase kinase, isozyme 2        | Multiple_Complex |
| TC0100017500.hg.1    | 8.09  | 9.52  | -2.7   | 1.95E-08 | 2.75E-07 | TMEM63A    | transmembrane protein 63A                       | Multiple_Complex |
| TC0X00006676.hg.1    | 7.94  | 5.11  | 7.09   | 1.95E-08 | 2.75E-07 | BMX        | BMX non-receptor tyrosine kinase                | Multiple_Complex |
| TC1800006739.hg.1    | 9.45  | 10.6  | -2.22  | 1.96E-08 | 2.75E-07 | PSMG2      | proteasome (prosome, macropain) assembly c      | Multiple_Complex |
| TC1700008757.hg.1    | 9.07  | 7.3   | 3.42   | 1.96E-08 | 2.75E-07 | MAP2K6     | mitogen-activated protein kinase kinase 6       | Multiple_Complex |
| TC1200010977.hg.1    | 6.36  | 7.78  | -2.67  | 1.96E-08 | 2.76E-07 | CDK4       | cyclin-dependent kinase 4                       | Multiple_Complex |
| TC0100009344.hg.1    | 5.78  | 7.02  | -2.37  | 1.97E-08 | 2.77E-07 | SARS       | seryl-tRNA synthetase                           | Multiple_Complex |
| TC0600010017.hg.1    | 8.26  | 9.79  | -2.9   | 1.98E-08 | 2.78E-07 | TMEM181    | transmembrane protein 181                       | Multiple_Complex |
| TC0400008134.hg.1    | 8.4   | 5.79  | 6.13   | 1.98E-08 | 2.78E-07 | MMRN1      | multimerin 1                                    | Multiple_Complex |
| TC1500010907.hg.1    | 5.25  | 6.44  | -2.28  | 1.98E-08 | 2.78E-07 | MESDC2     | mesoderm development candidate 2                | Multiple_Complex |
| TC0400012621.hg.1    | 16.06 | 12.9  | 8.95   | 1.99E-08 | 2.79E-07 | ACSL1      | acyl-CoA synthetase long-chain family membe     | Multiple_Complex |
| TC1000010498.hg.1    | 5.82  | 7.65  | -3.54  | 2.00E-08 | 2.80E-07 | 8-Mar      | Transcript Identified by AceView, Entrez Gene   | Unassigned       |
| TC0100014257.hg.1    | 8.98  | 10.13 | -2.22  | 2.01E-08 | 2.81E-07 | SSBP3      | single stranded DNA binding protein 3           | Multiple_Complex |
| TC1200007931.hg.1    | 6.92  | 7.99  | -2.1   | 2.01E-08 | 2.81E-07 | SLC16A7    | solute carrier family 16 (monocarboxylate trar  | Multiple_Complex |
| TC0600006873.hg.1    | 7.95  | 5.95  | 4      | 2.03E-08 | 2.83E-07 | BMP6       | bone morphogenetic protein 6                    | Multiple_Complex |

|                      |       |       |       |          |          |          |                                                |                  |
|----------------------|-------|-------|-------|----------|----------|----------|------------------------------------------------|------------------|
| TC0500013373.hg.1    | 8     | 7.1   | 1.86  | 2.03E-08 | 2.84E-07 | SRA1     | steroid receptor RNA activator 1               | Multiple_Complex |
| TC0100008653.hg.1    | 5.01  | 6.41  | -2.63 | 2.03E-08 | 2.84E-07 | IL12RB2  | interleukin 12 receptor, beta 2                | Multiple_Complex |
| TC1500007633.hg.1    | 7.54  | 8.99  | -2.72 | 2.03E-08 | 2.84E-07 | SMAD3    | SMAD family member 3                           | Multiple_Complex |
| TC0900011819.hg.1    | 7.92  | 9.24  | -2.5  | 2.04E-08 | 2.85E-07 | TSC1     | tuberous sclerosis 1                           | Multiple_Complex |
| TC0100010674.hg.1    | 6.87  | 8.43  | -2.94 | 2.08E-08 | 2.90E-07 | GPR52    | G protein-coupled receptor 52                  | Coding           |
| TC0600012514.hg.1    | 10.95 | 9.26  | 3.21  | 2.09E-08 | 2.91E-07 | AKIRIN2  | akirin 2                                       | Multiple_Complex |
| TC0700009488.hg.1    | 8.49  | 10.07 | -2.99 | 2.11E-08 | 2.93E-07 | CASP2    | caspase 2                                      | Multiple_Complex |
| TC1800007863.hg.1    | 5.16  | 6.17  | -2.02 | 2.14E-08 | 2.97E-07 | ENOSF1   | enolase superfamily member 1                   | Multiple_Complex |
| TC0600012566.hg.1    | 8.35  | 9.37  | -2.03 | 2.14E-08 | 2.98E-07 | MAP3K7   | mitogen-activated protein kinase kinase kinase | Multiple_Complex |
| TC1500009952.hg.1    | 12.46 | 10.31 | 4.43  | 2.16E-08 | 3.01E-07 | PKM      | pyruvate kinase, muscle                        | Multiple_Complex |
| TC1800008978.hg.1    | 4.44  | 6.47  | -4.08 | 2.19E-08 | 3.04E-07 | RTTN     | rotatin                                        | Multiple_Complex |
| TC0200009964.hg.1    | 10.97 | 7.82  | 8.9   | 2.20E-08 | 3.05E-07 | HAT1     | histone acetyltransferase 1                    | Multiple_Complex |
| TC0600014241.hg.1    | 10.55 | 8.62  | 3.83  | 2.20E-08 | 3.05E-07 | TBC1D7   | TBC1 domain family, member 7                   | Multiple_Complex |
| TC1500008751.hg.1    | 7.61  | 9.16  | -2.91 | 2.22E-08 | 3.08E-07 | UBE3A    | ubiquitin protein ligase E3A                   | Multiple_Complex |
| TC0200012734.hg.1    | 9.72  | 10.88 | -2.24 | 2.24E-08 | 3.10E-07 | USP34    | ubiquitin specific peptidase 34                | Multiple_Complex |
| TC1000008431.hg.1    | 10.46 | 12.7  | -4.71 | 2.25E-08 | 3.11E-07 | PCGF5    | polycomb group ring finger 5                   | Multiple_Complex |
| TC0100018247.hg.1    | 8.6   | 9.7   | -2.14 | 2.27E-08 | 3.14E-07 | LRRK8D   | leucine rich repeat containing 8 family, memb  | Multiple_Complex |
| TC0200016530.hg.1    | 10.03 | 8.77  | 2.41  | 2.28E-08 | 3.15E-07 | PLEKHB2  | pleckstrin homology domain containing, famil   | Multiple_Complex |
| TC1700011476.hg.1    | 15    | 13.77 | 2.36  | 2.29E-08 | 3.16E-07 | GNA13    | guanine nucleotide binding protein (G protein  | Multiple_Complex |
| TC1200012861.hg.1    | 7.75  | 6.69  | 2.09  | 2.29E-08 | 3.16E-07 | DIABLO   | diablo, IAP-binding mitochondrial protein      | Multiple_Complex |
| TC1000008795.hg.1    | 11.86 | 10.41 | 2.74  | 2.31E-08 | 3.18E-07 | SLK      | STE20-like kinase                              | Multiple_Complex |
| TC0300010329.hg.1    | 6.51  | 8.24  | -3.3  | 2.31E-08 | 3.18E-07 | NUP210   | nucleoporin 210kDa                             | Multiple_Complex |
| TC0600014360.hg.1    | 10.68 | 11.66 | -1.98 | 2.32E-08 | 3.19E-07 | IPCE1    | interaction protein for cytohesin exchange fac | Multiple_Complex |
| TC2000008310.hg.1    | 10.59 | 8.8   | 3.48  | 2.33E-08 | 3.20E-07 | TRMT6    | tRNA methyltransferase 6                       | Multiple_Complex |
| TC1000007103.hg.1    | 11.95 | 10.92 | 2.04  | 2.35E-08 | 3.23E-07 | RAB18    | RAB18, member RAS oncogene family              | Multiple_Complex |
| TC0500012455.hg.1    | 6.46  | 8.63  | -4.5  | 2.36E-08 | 3.25E-07 | CSF1R    | colony stimulating factor 1 receptor           | Multiple_Complex |
| TC0200013603.hg.1    | 8.23  | 6.46  | 3.41  | 2.37E-08 | 3.26E-07 | MITD1    | microtubule interacting and trafficking domain | Multiple_Complex |
| TC0100008347.hg.1    | 5.24  | 7.08  | -3.6  | 2.38E-08 | 3.27E-07 | CPT2     | carnitine palmitoyltransferase 2               | Multiple_Complex |
| TSUnmapped00000630.h | 4.65  | 6.24  | -3.02 | 2.38E-08 | 3.27E-07 | ZNF780A  | zinc finger protein 780A                       | Coding           |
| TC0200016679.hg.1    | 8.73  | 7.28  | 2.74  | 2.40E-08 | 3.29E-07 | SERTAD2  | SERTA domain containing 2                      | Multiple_Complex |
| TC0600007847.hg.1    | 8.9   | 6.45  | 5.48  | 2.50E-08 | 3.43E-07 | CDKN1A   | cyclin-dependent kinase inhibitor 1A (p21, Cip | Multiple_Complex |
| TC1000012490.hg.1    | 8.51  | 7.12  | 2.63  | 2.50E-08 | 3.43E-07 | PI4K2A   | phosphatidylinositol 4-kinase type 2 alpha     | Multiple_Complex |
| TC0100006840.hg.1    | 11.12 | 12.12 | -2    | 2.55E-08 | 3.49E-07 | TARDBP   | TAR DNA binding protein                        | Multiple_Complex |
| TC0200016703.hg.1    | 12.6  | 10.98 | 3.09  | 2.55E-08 | 3.49E-07 | CHMP3    | charged multivesicular body protein 3          | Multiple_Complex |
| TC0900007494.hg.1    | 6.02  | 7.39  | -2.58 | 2.56E-08 | 3.50E-07 | FXN      | frataxin                                       | Multiple_Complex |
| TC1500007912.hg.1    | 5.63  | 7     | -2.6  | 2.57E-08 | 3.51E-07 | FBXO22   | F-box protein 22                               | Multiple_Complex |
| TC0200010733.hg.1    | 7.45  | 9.14  | -3.23 | 2.57E-08 | 3.51E-07 | XRCC5    | Memczak2013 ALT_ACCEPTOR, ALT_DONOR,           | NonCoding        |
| TC0400012874.hg.1    | 4.59  | 6.45  | -3.63 | 2.57E-08 | 3.51E-07 | CYP4V2   | cytochrome P450, family 4, subfamily V, poly   | Multiple_Complex |
| TC0200008005.hg.1    | 11.37 | 8.16  | 9.28  | 2.57E-08 | 3.51E-07 | DYSF     | dysferlin                                      | Multiple_Complex |
| TC2100006967.hg.1    | 16.14 | 14.63 | 2.85  | 2.58E-08 | 3.51E-07 | IFNGR2   | interferon gamma receptor 2 (interferon gam    | Multiple_Complex |
| TC0100015885.hg.1    | 10.12 | 11.32 | -2.29 | 2.58E-08 | 3.51E-07 | GATAD2B  | GATA zinc finger domain containing 2B          | Multiple_Complex |
| TC0200012062.hg.1    | 5.62  | 6.77  | -2.22 | 2.60E-08 | 3.54E-07 | PREB     | prolactin regulatory element binding           | Multiple_Complex |
| TC1700009686.hg.1    | 4.73  | 6.03  | -2.47 | 2.60E-08 | 3.54E-07 | SLC25A35 | solute carrier family 25, member 35            | Multiple_Complex |
| TC1000011485.hg.1    | 10.58 | 8.02  | 5.9   | 2.62E-08 | 3.56E-07 | PDLIM1   | PDZ and LIM domain 1                           | Multiple_Complex |
| TC1100011030.hg.1    | 7.92  | 9.05  | -2.18 | 2.64E-08 | 3.59E-07 | DDB1     | damage-specific DNA binding protein 1          | Multiple_Complex |
| TC1900011721.hg.1    | 5.35  | 6.78  | -2.69 | 2.69E-08 | 3.65E-07 | HKR1     | HKR1, GLI-Kruppel zinc finger family member    | NonCoding        |
| TC1900009371.hg.1    | 6.29  | 7.72  | -2.7  | 2.70E-08 | 3.66E-07 | ARRDC5   | arrestin domain containing 5                   | Coding           |
| TC1800007471.hg.1    | 6.32  | 5.04  | 2.43  | 2.73E-08 | 3.70E-07 | PMAIP1   | phorbol-12-myristate-13-acetate-induced pro    | Multiple_Complex |
| TC0800011002.hg.1    | 5.94  | 4.27  | 3.19  | 2.79E-08 | 3.78E-07 | REX1     | REX1, RNA exonuclease 1 homolog-like 10, psi   | Multiple_Complex |
| TC0200007803.hg.1    | 10.54 | 7.88  | 6.3   | 2.81E-08 | 3.81E-07 | LGALS1   | lectin, galactoside-binding-like               | Multiple_Complex |
| TC0100015984.hg.1    | 7.35  | 8.54  | -2.28 | 2.85E-08 | 3.85E-07 | UBQLN4   | ubiquilin 4                                    | Multiple_Complex |
| TC0500009521.hg.1    | 11.7  | 9.59  | 4.31  | 2.86E-08 | 3.87E-07 | CPEB4    | cytoplasmic polyadenylation element binding    | Multiple_Complex |
| TC0100007370.hg.1    | 5.15  | 7.48  | -5.04 | 2.91E-08 | 3.94E-07 | RCAN3    | RCAN family member 3                           | Multiple_Complex |
| TC1700008175.hg.1    | 12    | 10.81 | 2.29  | 2.92E-08 | 3.94E-07 | CALCOCO2 | calcium binding and coiled-coil domain 2       | Multiple_Complex |
| TC1700007399.hg.1    | 4.79  | 6.19  | -2.64 | 2.94E-08 | 3.96E-07 | ERAL1    | Era-like 12S mitochondrial rRNA chaperone 1    | Multiple_Complex |
| TC0600014273.hg.1    | 11.9  | 14.32 | -5.33 | 2.94E-08 | 3.96E-07 | HLA-DRB1 | major histocompatibility complex, class II, DR | Multiple_Complex |
| TC2000007219.hg.1    | 8.07  | 9.51  | -2.72 | 2.96E-08 | 3.99E-07 | ERGIC3   | ERGIC and golgi 3                              | Multiple_Complex |
| TC0100010623.hg.1    | 8.23  | 6.4   | 3.55  | 2.97E-08 | 4.00E-07 | SUCO     | SUN domain containing ossification factor      | Multiple_Complex |
| TC0300011048.hg.1    | 10.09 | 11.32 | -2.34 | 2.98E-08 | 4.01E-07 | QRICH1   | glutamine-rich 1                               | Multiple_Complex |
| TC0500007434.hg.1    | 14.78 | 10.31 | 22.13 | 3.00E-08 | 4.04E-07 | RPL41    | Synthetic construct Homo sapiens clone IMAG    | Multiple_Complex |
| TC0800009094.hg.1    | 13.14 | 11.3  | 3.58  | 3.01E-08 | 4.05E-07 | DENND3   | DENN/MADD domain containing 3                  | Multiple_Complex |
| TC0200016646.hg.1    | 9.69  | 8.24  | 2.74  | 3.04E-08 | 4.09E-07 | MEMO1    | mediator of cell motility 1                    | Multiple_Complex |
| TC0900007116.hg.1    | 5.39  | 4.14  | 2.37  | 3.06E-08 | 4.11E-07 | CCIN     | calicin                                        | Coding           |
| TC1000008276.hg.1    | 10.88 | 12.31 | -2.69 | 3.07E-08 | 4.12E-07 | CCSER2   | coiled-coil serine rich protein 2              | Multiple_Complex |
| TC1400009791.hg.1    | 4.95  | 6.08  | -2.18 | 3.07E-08 | 4.12E-07 | ALKBH1   | alkB homolog 1, histone H2A dioxygenase        | Multiple_Complex |
| TC1600007169.hg.1    | 13.16 | 11.65 | 2.85  | 3.09E-08 | 4.15E-07 | METTL9   | methyltransferase like 9                       | Multiple_Complex |
| TC1900008214.hg.1    | 8.87  | 5.2   | 12.74 | 3.11E-08 | 4.17E-07 | CD177    | CD177 molecule                                 | Coding           |
| TC0900008742.hg.1    | 7.23  | 5.88  | 2.55  | 3.11E-08 | 4.17E-07 | ARPC5L   | actin related protein 2/3 complex subunit 5-li | Multiple_Complex |
| TC1700012109.hg.1    | 6.81  | 8.17  | -2.58 | 3.12E-08 | 4.17E-07 | CD7      | CD7 molecule                                   | Multiple_Complex |
| TC1700010436.hg.1    | 4.99  | 6.21  | -2.32 | 3.12E-08 | 4.17E-07 | PEX12    | peroxisomal biogenesis factor 12               | Coding           |

|                   |       |       |       |          |          |            |                                                   |                  |
|-------------------|-------|-------|-------|----------|----------|------------|---------------------------------------------------|------------------|
| TC1500010787.hg.1 | 11.72 | 9.94  | 3.43  | 3.12E-08 | 4.17E-07 | LINC01578  | long intergenic non-protein coding RNA 1578       | NonCoding        |
| TC1500010660.hg.1 | 6.66  | 5.45  | 2.31  | 3.13E-08 | 4.18E-07 | PCSK6      | proprotein convertase subtilisin/kexin type 6     | Multiple_Complex |
| TC0300011054.hg.1 | 4.4   | 5.56  | -2.23 | 3.15E-08 | 4.20E-07 | CCDC71     | coiled-coil domain containing 71                  | Coding           |
| TC1000010071.hg.1 | 6.97  | 4.9   | 4.18  | 3.20E-08 | 4.26E-07 | ENKUR      | enkurin, TRPC channel interacting protein         | Multiple_Complex |
| TC0100018515.hg.1 | 5.7   | 4.45  | 2.37  | 3.21E-08 | 4.28E-07 | CFAP45     | cilia and flagella associated protein 45          | Multiple_Complex |
| TC1600009381.hg.1 | 5.96  | 7.03  | -2.1  | 3.24E-08 | 4.31E-07 | DEXI       | Dexi homolog (mouse)                              | Multiple_Complex |
| TC0100014250.hg.1 | 12.54 | 10.95 | 3.02  | 3.25E-08 | 4.32E-07 | TMEM59     | transmembrane protein 59                          | Multiple_Complex |
| TC0400010463.hg.1 | 12.14 | 7.93  | 18.54 | 3.25E-08 | 4.33E-07 | RPL9       | ribosomal protein L9                              | Multiple_Complex |
| TC1100012961.hg.1 | 5.8   | 4.95  | 1.8   | 3.28E-08 | 4.36E-07 | AMPD3      | adenosine monophosphate deaminase 3               | Multiple_Complex |
| TC1600007511.hg.1 | 6.59  | 7.75  | -2.25 | 3.33E-08 | 4.42E-07 | ZNF646     | zinc finger protein 646                           | Coding           |
| TC0200015976.hg.1 | 14.15 | 16.21 | -4.17 | 3.35E-08 | 4.45E-07 | SP110      | SP110 nuclear body protein                        | Multiple_Complex |
| TC0700011493.hg.1 | 8.52  | 9.62  | -2.15 | 3.38E-08 | 4.48E-07 | BAZ1B      | bromodomain adjacent to zinc finger domain        | Multiple_Complex |
| TC1200012798.hg.1 | 11.11 | 12.92 | -3.5  | 3.38E-08 | 4.48E-07 | ATP5G2     | ATP synthase, H+ transporting, mitochondrial      | Multiple_Complex |
| TC1700010916.hg.1 | 8.12  | 10.08 | -3.88 | 3.39E-08 | 4.50E-07 | ARL17B; AF | ADP-ribosylation factor like GTPase 17B; ADP-     | Multiple_Complex |
| TC0500008653.hg.1 | 6.54  | 5.24  | 2.46  | 3.40E-08 | 4.50E-07 | UQCRQ      | ubiquinol-cytochrome c reductase complex III      | Multiple_Complex |
| TC0800007330.hg.1 | 5.94  | 7.06  | -2.17 | 3.43E-08 | 4.54E-07 | DDHD2      | DDHD domain containing 2                          | Multiple_Complex |
| TC0400008359.hg.1 | 14.57 | 8.22  | 81.91 | 3.43E-08 | 4.54E-07 | RPL34      | ribosomal protein L34                             | Multiple_Complex |
| TC0100016024.hg.1 | 7.73  | 8.99  | -2.39 | 3.44E-08 | 4.55E-07 | SH2D2A     | SH2 domain containing 2A                          | Multiple_Complex |
| TC0300008385.hg.1 | 5.38  | 6.45  | -2.09 | 3.44E-08 | 4.55E-07 | TIGIT      | T-cell immunoreceptor with Ig and ITIM doma       | Multiple_Complex |
| TC0500013384.hg.1 | 6.91  | 8.67  | -3.38 | 3.46E-08 | 4.57E-07 | PPP2R2B    | protein phosphatase 2, regulatory subunit B, t    | Multiple_Complex |
| TC0200008807.hg.1 | 9.39  | 7.86  | 2.89  | 3.49E-08 | 4.61E-07 | RANBP2     | RAN binding protein 2                             | Multiple_Complex |
| TC1400010777.hg.1 | 10.53 | 12.5  | -3.93 | 3.55E-08 | 4.68E-07 | TC2N       | tandem C2 domains, nuclear                        | Multiple_Complex |
| TC0200013030.hg.1 | 6.27  | 4.51  | 3.4   | 3.61E-08 | 4.76E-07 | DYSF; kydo | Memczak2013 ANTISENSE, coding, INTERNAL,          | NonCoding        |
| TC1800007504.hg.1 | 7.9   | 9.15  | -2.38 | 3.62E-08 | 4.77E-07 | KIAA1468   | KIAA1468                                          | Multiple_Complex |
| TC1400008945.hg.1 | 7.45  | 9.47  | -4.07 | 3.62E-08 | 4.77E-07 | RALGAP1A   | Ral GTPase activating protein, alpha subunit 1    | Multiple_Complex |
| TC1600007557.hg.1 | 12.16 | 10.09 | 4.2   | 3.66E-08 | 4.82E-07 | ZNF267     | zinc finger protein 267                           | Multiple_Complex |
| TC0400010251.hg.1 | 8.51  | 9.85  | -2.53 | 3.67E-08 | 4.83E-07 | DHX15      | DEAH (Asp-Glu-Ala-His) box helicase 15            | Multiple_Complex |
| TC0600007207.hg.1 | 5.49  | 4.2   | 2.45  | 3.68E-08 | 4.84E-07 | GMMN       | geminin, DNA replication inhibitor                | Multiple_Complex |
| TC2200008734.hg.1 | 7.77  | 8.87  | -2.15 | 3.69E-08 | 4.84E-07 | CBX7       | chromobox homolog 7                               | Multiple_Complex |
| TC0700008430.hg.1 | 7.81  | 6.08  | 3.3   | 3.69E-08 | 4.85E-07 | SDHAF3     | succinate dehydrogenase complex assembly f        | Multiple_Complex |
| TC0500009321.hg.1 | 9.18  | 10.44 | -2.39 | 3.70E-08 | 4.85E-07 | MAT2B      | methionine adenosyltransferase II, beta           | Multiple_Complex |
| TC0600007608.hg.1 | 8.85  | 6.1   | 6.72  | 3.70E-08 | 4.86E-07 | C6orf25    | chromosome 6 open reading frame 25                | Multiple_Complex |
| TC1400007639.hg.1 | 7.17  | 8.46  | -2.44 | 3.73E-08 | 4.88E-07 | C14orf169  | chromosome 14 open reading frame 169              | Multiple_Complex |
| TC0700008765.hg.1 | 8.65  | 6.74  | 3.76  | 3.74E-08 | 4.90E-07 | DLI        | dihydrolipoamide dehydrogenase                    | Multiple_Complex |
| TC1900007957.hg.1 | 5.3   | 6.38  | -2.11 | 3.76E-08 | 4.92E-07 | ZNF568     | zinc finger protein 568                           | Multiple_Complex |
| TC1200012799.hg.1 | 7.68  | 6.16  | 2.86  | 3.82E-08 | 4.99E-07 | SARNP      | SAP domain containing ribonucleoprotein           | Multiple_Complex |
| TC0400010418.hg.1 | 12    | 10.04 | 3.88  | 3.84E-08 | 5.02E-07 | RELL1      | RELT-like 1                                       | Multiple_Complex |
| TC0600007597.hg.1 | 12.82 | 11.04 | 3.45  | 3.85E-08 | 5.02E-07 | LST1       | leukocyte specific transcript 1                   | Multiple_Complex |
| TC1200012754.hg.1 | 5.2   | 7.31  | -4.33 | 3.91E-08 | 5.10E-07 | KLRC1      | killer cell lectin-like receptor subfamily C, mem | Multiple_Complex |
| TC0600007306.hg.1 | 9.75  | 11.71 | -3.89 | 3.91E-08 | 5.10E-07 | BTN3A3     | butyrophilin, subfamily 3, member A3              | Multiple_Complex |
| TC0900008827.hg.1 | 6.61  | 7.75  | -2.21 | 3.94E-08 | 5.13E-07 | FPGS       | folylpolyglutamate synthase                       | Multiple_Complex |
| TC0900012184.hg.1 | 5.95  | 7.07  | -2.17 | 3.95E-08 | 5.14E-07 | PRRC2B     | proline-rich coiled-coil 2B                       | Multiple_Complex |
| TC0700008081.hg.1 | 8.56  | 9.95  | -2.62 | 3.97E-08 | 5.17E-07 | MDH2       | malate dehydrogenase 2                            | Multiple_Complex |
| TC1200008568.hg.1 | 9.09  | 10.47 | -2.6  | 3.98E-08 | 5.18E-07 | TMPO       | thymopoietin                                      | Multiple_Complex |
| TC1600009236.hg.1 | 5.07  | 6.69  | -3.07 | 4.05E-08 | 5.26E-07 | UBALD1     | UBA-like domain containing 1                      | Multiple_Complex |
| TC0600013203.hg.1 | 10.56 | 7.33  | 9.43  | 4.05E-08 | 5.26E-07 | VNN1       | vanin 1                                           | Coding           |
| TC0800008370.hg.1 | 8.32  | 6.53  | 3.46  | 4.06E-08 | 5.27E-07 | POLR2K     | polymerase (RNA) II (DNA directed) polypepti      | Multiple_Complex |
| TC0100012376.hg.1 | 7.16  | 8.5   | -2.54 | 4.06E-08 | 5.28E-07 | ZNF672     | zinc finger protein 672                           | Multiple_Complex |
| TC2000010010.hg.1 | 7.1   | 8.06  | -1.95 | 4.08E-08 | 5.30E-07 | BLCAP      | bladder cancer associated protein                 | Multiple_Complex |
| TC0200015425.hg.1 | 8.01  | 9.47  | -2.75 | 4.10E-08 | 5.31E-07 | TRAK2      | trafficking protein, kinesin binding 2            | Multiple_Complex |
| TC0400011014.hg.1 | 8.9   | 6.91  | 3.98  | 4.15E-08 | 5.37E-07 | CXCL5      | chemokine (C-X-C motif) ligand 5                  | Multiple_Complex |
| TC2000007507.hg.1 | 6.69  | 7.78  | -2.13 | 4.15E-08 | 5.37E-07 | ZSWIM1     | zinc finger, SWIM-type containing 1               | Multiple_Complex |
| TC1600008505.hg.1 | 7.72  | 8.61  | -1.85 | 4.15E-08 | 5.37E-07 | WVVOX      | WW domain containing oxidoreductase               | Multiple_Complex |
| TC0700012461.hg.1 | 8.03  | 9.49  | -2.75 | 4.22E-08 | 5.47E-07 | WASL       | Wiskott-Aldrich syndrome-like                     | Multiple_Complex |
| TC1900008533.hg.1 | 14.94 | 16.76 | -3.54 | 4.25E-08 | 5.49E-07 | CD37       | CD37 molecule                                     | Multiple_Complex |
| TC1800008824.hg.1 | 9.7   | 11.18 | -2.79 | 4.26E-08 | 5.51E-07 | LMAN1      | lectin, mannose-binding, 1                        | Multiple_Complex |
| TC0300008142.hg.1 | 10.51 | 9.07  | 2.71  | 4.28E-08 | 5.53E-07 | TBC1D23    | TBC1 domain family, member 23                     | Multiple_Complex |
| TC1200011845.hg.1 | 14.84 | 16.47 | -3.11 | 4.28E-08 | 5.53E-07 | SELPLG     | selectin P ligand                                 | Coding           |
| TC1200011385.hg.1 | 9.28  | 6.86  | 5.36  | 4.37E-08 | 5.64E-07 | LIN7A      | lin-7 homolog A (C. elegans)                      | Multiple_Complex |
| TC0400008380.hg.1 | 9.73  | 11.79 | -4.18 | 4.43E-08 | 5.71E-07 | CCDC109B   | coiled-coil domain containing 109B                | Multiple_Complex |
| TC1900009628.hg.1 | 8.97  | 7.56  | 2.67  | 4.48E-08 | 5.77E-07 | CDC37; MII | cell division cycle 37; microRNA 1181             | Multiple_Complex |
| TC0200013079.hg.1 | 9.63  | 10.69 | -2.09 | 4.49E-08 | 5.78E-07 | DUSP11     | dual specificity phosphatase 11                   | Multiple_Complex |
| TC0700013544.hg.1 | 8.05  | 5.78  | 4.8   | 4.57E-08 | 5.88E-07 | PSMA2      | proteasome subunit alpha 2                        | Multiple_Complex |
| TC0300013896.hg.1 | 12.96 | 11.18 | 3.45  | 4.60E-08 | 5.91E-07 | MFSD1      | major facilitator superfamily domain containir    | Multiple_Complex |
| TC0300006784.hg.1 | 14.47 | 12.89 | 2.99  | 4.63E-08 | 5.95E-07 | RAB5A      | RAB5A, member RAS oncogene family                 | Multiple_Complex |
| TC2000009204.hg.1 | 6.32  | 7.4   | -2.11 | 4.70E-08 | 6.04E-07 | TOMM34     | translocase of outer mitochondrial membrane       | Multiple_Complex |
| TC0100011533.hg.1 | 5.9   | 4.6   | 2.45  | 4.70E-08 | 6.04E-07 | ATF3       | activating transcription factor 3                 | Multiple_Complex |
| TC0100009444.hg.1 | 13.81 | 12.45 | 2.57  | 4.73E-08 | 6.06E-07 | CAP2A1     | capping protein (actin filament) muscle Z-line,   | Multiple_Complex |
| TC0400006804.hg.1 | 6.62  | 5.08  | 2.91  | 4.73E-08 | 6.06E-07 | USP17L22;  | ubiquitin specific peptidase 17-like family mer   | Coding           |
| TC0900011254.hg.1 | 7.82  | 6.71  | 2.16  | 4.73E-08 | 6.06E-07 | CDC26      | cell division cycle 26                            | Multiple_Complex |

|                      |       |       |        |          |          |            |                                                                |                  |
|----------------------|-------|-------|--------|----------|----------|------------|----------------------------------------------------------------|------------------|
| TC1100012444.hg.1    | 6.85  | 8     | -2.22  | 4.73E-08 | 6.06E-07 | PCSK7      | proprotein convertase subtilisin/kexin type 7                  | Multiple_Complex |
| TC1900010460.hg.1    | 5.4   | 6.56  | -2.23  | 4.74E-08 | 6.07E-07 | ZNF792     | zinc finger protein 792                                        | Multiple_Complex |
| TC0800007321.hg.1    | 9.1   | 7.98  | 2.18   | 4.74E-08 | 6.07E-07 | ASH2L      | ash2 (absent, small, or homeotic)-like (Drosop                 | Multiple_Complex |
| TC1300008735.hg.1    | 8.5   | 9.8   | -2.46  | 4.75E-08 | 6.07E-07 | VWA8; MIF  | von Willebrand factor A domain containing 8; Multiple_Complex  | Multiple_Complex |
| TC0200016705.hg.1    | 10.53 | 8.89  | 3.12   | 4.78E-08 | 6.11E-07 | RNF103-CH  | RNF103-CHMP3 readthrough; charged multiv                       | Coding           |
| TC0500009488.hg.1    | 11.95 | 10.61 | 2.52   | 4.89E-08 | 6.24E-07 | CREBRF     | CREB3 regulatory factor                                        | Multiple_Complex |
| TC1200007899.hg.1    | 4.88  | 6.39  | -2.84  | 4.92E-08 | 6.28E-07 | 9-Mar      | membrane associated ring finger 9                              | Multiple_Complex |
| TC1900010886.hg.1    | 5.48  | 6.62  | -2.2   | 4.95E-08 | 6.32E-07 | ZNF235     | zinc finger protein 235                                        | Multiple_Complex |
| TC0Y00006444.hg.1    | 12.38 | 10.58 | 3.48   | 4.99E-08 | 6.36E-07 | CSF2RA     | colony stimulating factor 2 receptor, alpha, lo                | Multiple_Complex |
| TC1500007939.hg.1    | 6     | 7.2   | -2.3   | 5.03E-08 | 6.40E-07 | HMG20A     | high mobility group 20A                                        | Multiple_Complex |
| TC2000007251.hg.1    | 12.53 | 9.2   | 10.07  | 5.04E-08 | 6.42E-07 | MYL9       | myosin light chain 9                                           | Multiple_Complex |
| TC1100008012.hg.1    | 9.53  | 10.73 | -2.3   | 5.07E-08 | 6.45E-07 | DPF2       | D4, zinc and double PHD fingers family 2                       | Multiple_Complex |
| TC1000011043.hg.1    | 5.08  | 4.17  | 1.87   | 5.07E-08 | 6.45E-07 | C10orf55   | chromosome 10 open reading frame 55                            | Multiple_Complex |
| TC0100018498.hg.1    | 9.61  | 11.47 | -3.63  | 5.08E-08 | 6.45E-07 | KRTCAP2    | keratinocyte associated protein 2                              | Multiple_Complex |
| TC1000006880.hg.1    | 6.66  | 8.2   | -2.92  | 5.08E-08 | 6.46E-07 | PTER       | phosphotriesterase related                                     | Multiple_Complex |
| TC1100006810.hg.1    | 7.8   | 8.87  | -2.11  | 5.12E-08 | 6.50E-07 | IPO7; SNOF | importin 7; small nucleolar RNA, H/ACA box 2; Multiple_Complex | Multiple_Complex |
| TC0X00008794.hg.1    | 7.22  | 11.79 | -23.66 | 5.14E-08 | 6.52E-07 | SLC6A8     | solute carrier family 6 (neurotransmitter trans                | Multiple_Complex |
| TC0600014139.hg.1    | 6.34  | 7.42  | -2.12  | 5.16E-08 | 6.54E-07 | PRIM2      | primase, DNA, polypeptide 2 (58kDa)                            | Multiple_Complex |
| TC0300011801.hg.1    | 6.58  | 7.91  | -2.5   | 5.20E-08 | 6.58E-07 | MINA       | MYC induced nuclear antigen                                    | Multiple_Complex |
| TC2000008815.hg.1    | 7.56  | 11.01 | -10.94 | 5.25E-08 | 6.65E-07 | BCL2L1     | BCL2-like 1                                                    | Multiple_Complex |
| TC1000009908.hg.1    | 15.8  | 14.11 | 3.22   | 5.25E-08 | 6.65E-07 | RSU1       | Ras suppressor protein 1                                       | Multiple_Complex |
| TC1900008103.hg.1    | 7.54  | 9.28  | -3.34  | 5.26E-08 | 6.65E-07 | PLD3       | phospholipase D family, member 3                               | Multiple_Complex |
| TC0200008500.hg.1    | 6.21  | 7.51  | -2.46  | 5.29E-08 | 6.68E-07 | CIAO1      | cytosolic iron-sulfur assembly component 1                     | Multiple_Complex |
| TC0700013067.hg.1    | 7.84  | 6.52  | 2.49   | 5.29E-08 | 6.69E-07 | SMARCD3    | SWI/SNF related, matrix associated, actin dep                  | Multiple_Complex |
| TC0100017229.hg.1    | 5.12  | 6.8   | -3.22  | 5.38E-08 | 6.79E-07 | INTS7      | integrator complex subunit 7                                   | Multiple_Complex |
| TC1800006889.hg.1    | 13.31 | 10.46 | 7.24   | 5.41E-08 | 6.83E-07 | RIOK3      | RIO kinase 3                                                   | Multiple_Complex |
| TC0400012381.hg.1    | 7.5   | 8.68  | -2.26  | 5.45E-08 | 6.87E-07 | NEK1       | NIMA-related kinase 1                                          | Multiple_Complex |
| TC1800006506.hg.1    | 15.8  | 14.07 | 3.32   | 5.53E-08 | 6.97E-07 | MYL12A     | myosin light chain 12A                                         | Multiple_Complex |
| TC1600009077.hg.1    | 13.03 | 15.06 | -4.11  | 5.53E-08 | 6.97E-07 | RPS2; SNOF | ribosomal protein S2; small nucleolar RNA, H/ Multiple_Complex | Multiple_Complex |
| TC2000010025.hg.1    | 12.54 | 13.98 | -2.72  | 5.56E-08 | 6.99E-07 | UBE2V1     | ubiquitin conjugating enzyme E2 variant 1                      | Multiple_Complex |
| TC0800010154.hg.1    | 7.42  | 6     | 2.68   | 5.58E-08 | 7.02E-07 | LSM1       | LSM1 homolog, mRNA degradation associate                       | Multiple_Complex |
| TC1100010757.hg.1    | 9.01  | 10.46 | -2.73  | 5.60E-08 | 7.04E-07 | MTCH2      | mitochondrial carrier 2                                        | Multiple_Complex |
| TC1100012775.hg.1    | 11.73 | 13.07 | -2.53  | 5.60E-08 | 7.04E-07 | ETS1       | v-ets avian erythroblastosis virus E26 oncogen                 | Multiple_Complex |
| TC0500013277.hg.1    | 7.37  | 8.75  | -2.6   | 5.61E-08 | 7.05E-07 | MAML1      | mastermind-like transcriptional coactivator 1                  | Multiple_Complex |
| TC1400007298.hg.1    | 10.08 | 8.42  | 3.17   | 5.63E-08 | 7.06E-07 | ACTR10     | actin-related protein 10 homolog (S. cerevisia                 | Multiple_Complex |
| TC2000007925.hg.1    | 13.53 | 10.47 | 8.32   | 5.64E-08 | 7.07E-07 | TUBB1      | tubulin, beta 1 class VI                                       | Coding           |
| TC1400010749.hg.1    | 6.48  | 7.83  | -2.55  | 5.66E-08 | 7.09E-07 | LINC01599  | long intergenic non-protein coding RNA 1599                    | Multiple_Complex |
| TC0600011465.hg.1    | 5.97  | 7.39  | -2.67  | 5.67E-08 | 7.11E-07 | EHMT2      | euchromatic histone-lysine N-methyltransfera                   | Multiple_Complex |
| TC0200011974.hg.1    | 11.24 | 8.27  | 7.82   | 5.71E-08 | 7.16E-07 | SF3B6      | splicing factor 3b subunit 6                                   | Multiple_Complex |
| TC0X00010648.hg.1    | 12.55 | 9.36  | 9.13   | 5.77E-08 | 7.22E-07 | RPL39; SNC | ribosomal protein L39; small nucleolar RNA, H Multiple_Complex | Multiple_Complex |
| TC0600009236.hg.1    | 8.14  | 6.28  | 3.63   | 5.77E-08 | 7.22E-07 | RWDD1      | RWD domain containing 1                                        | Multiple_Complex |
| TC1400006656.hg.1    | 9.42  | 10.94 | -2.86  | 5.80E-08 | 7.25E-07 | OXA1L      | oxidase (cytochrome c) assembly 1-like                         | Multiple_Complex |
| TC0600011372.hg.1    | 8.41  | 9.77  | -2.56  | 5.81E-08 | 7.26E-07 | PPP1R10    | protein phosphatase 1, regulatory subunit 10                   | Multiple_Complex |
| TC0200014790.hg.1    | 4.73  | 3.52  | 2.31   | 5.84E-08 | 7.29E-07 | GRB14      | growth factor receptor bound protein 14                        | Multiple_Complex |
| TC0300006840.hg.1    | 9.39  | 8.19  | 2.3    | 5.84E-08 | 7.29E-07 | UBE2E1     | ubiquitin conjugating enzyme E2E 1                             | Multiple_Complex |
| TC1200009722.hg.1    | 12.29 | 14.47 | -4.55  | 5.86E-08 | 7.31E-07 | TNFRSF1A   | tumor necrosis factor receptor superfamily, m                  | Multiple_Complex |
| TC0800011887.hg.1    | 8.43  | 9.58  | -2.22  | 5.89E-08 | 7.34E-07 | ST3GAL1    | ST3 beta-galactoside alpha-2,3-sialyltransfera                 | Multiple_Complex |
| TC1900011837.hg.1    | 9.53  | 8.16  | 2.57   | 5.92E-08 | 7.38E-07 | UQCRR11    | ubiquinol-cytochrome c reductase, complex III                  | Multiple_Complex |
| TC0500013430.hg.1    | 15.67 | 17.19 | -2.86  | 5.94E-08 | 7.40E-07 | GNB2L1; SF | guanine nucleotide binding protein (G protein                  | Multiple_Complex |
| TC0100015817.hg.1    | 6.67  | 8.17  | -2.84  | 5.96E-08 | 7.41E-07 | THEM4      | thioesterase superfamily member 4                              | Multiple_Complex |
| TSUnmapped00000753.h | 12.9  | 8.89  | 16.09  | 6.09E-08 | 7.58E-07 | RPS25      | ribosomal protein S25                                          | Coding           |
| TC1700011114.hg.1    | 7     | 7.9   | -1.87  | 6.11E-08 | 7.59E-07 | ANKRD40    | ankyrin repeat domain 40                                       | Multiple_Complex |
| TC2000008295.hg.1    | 11.34 | 9.54  | 3.46   | 6.12E-08 | 7.60E-07 | GPCPD1     | glycerophosphocholine phosphodiesterase 1                      | Multiple_Complex |
| TC2200006881.hg.1    | 6.18  | 7.67  | -2.8   | 6.15E-08 | 7.63E-07 | CABIN1     | calcineurin binding protein 1                                  | Multiple_Complex |
| TC1100011187.hg.1    | 6.59  | 7.75  | -2.24  | 6.16E-08 | 7.65E-07 | MEN1       | multiple endocrine neoplasia I                                 | Multiple_Complex |
| TC0600014044.hg.1    | 9.03  | 7.71  | 2.5    | 6.19E-08 | 7.67E-07 | PSMB1      | proteasome subunit beta 1                                      | Multiple_Complex |
| TC0200016421.hg.1    | 11.8  | 12.95 | -2.22  | 6.21E-08 | 7.69E-07 | BRE        | brain and reproductive organ-expressed (TNFI                   | Multiple_Complex |
| TC0300009313.hg.1    | 7.16  | 7.99  | -1.77  | 6.22E-08 | 7.70E-07 | GFM1       | G elongation factor, mitochondrial 1                           | Multiple_Complex |
| TC1900012025.hg.1    | 5.84  | 7.41  | -2.97  | 6.25E-08 | 7.73E-07 | ZNF28      | zinc finger protein 28                                         | Multiple_Complex |
| TC0200014167.hg.1    | 7.59  | 8.76  | -2.25  | 6.32E-08 | 7.82E-07 | ERCC3      | excision repair cross-complementation group                    | Multiple_Complex |
| TC1900010073.hg.1    | 11.31 | 9.77  | 2.9    | 6.37E-08 | 7.87E-07 | LPAR2      | lysophosphatidic acid receptor 2                               | Multiple_Complex |
| TC1600010028.hg.1    | 6.08  | 7.25  | -2.26  | 6.38E-08 | 7.88E-07 | C16orf58   | chromosome 16 open reading frame 58                            | Multiple_Complex |
| TC0300011378.hg.1    | 9.86  | 8.39  | 2.78   | 6.46E-08 | 7.97E-07 | THOC7      | THO complex 7                                                  | Multiple_Complex |
| TC1700009417.hg.1    | 7     | 8.38  | -2.6   | 6.46E-08 | 7.97E-07 | SMG6       | SMG6 nonsense mediated mRNA decay factor                       | Multiple_Complex |
| TC0900011404.hg.1    | 11.13 | 9.44  | 3.22   | 6.48E-08 | 7.99E-07 | STOM       | stomatin                                                       | Multiple_Complex |
| TC0200012971.hg.1    | 8.37  | 6.51  | 3.64   | 6.49E-08 | 8.00E-07 | ANXA4      | Salzman2013 ANTISENSE, coding, INTERNAL, i                     | NonCoding        |
| TC0900011597.hg.1    | 8.39  | 9.64  | -2.38  | 6.52E-08 | 8.03E-07 | SH2D3C     | SH2 domain containing 3C                                       | Multiple_Complex |
| TC0300014052.hg.1    | 7.72  | 9.13  | -2.66  | 6.57E-08 | 8.09E-07 | RYK        | receptor-like tyrosine kinase                                  | Multiple_Complex |
| TC1900008146.hg.1    | 7.73  | 8.71  | -1.98  | 6.60E-08 | 8.12E-07 | CCDC97     | coiled-coil domain containing 97                               | Coding           |
| TC2000008095.hg.1    | 10.69 | 9.46  | 2.33   | 6.61E-08 | 8.13E-07 | TPD52L2    | tumor protein D52-like 2                                       | Multiple_Complex |

|                   |       |       |       |          |          |               |                                                           |                  |
|-------------------|-------|-------|-------|----------|----------|---------------|-----------------------------------------------------------|------------------|
| TC1100007688.hg.1 | 8.13  | 9.24  | -2.15 | 6.62E-08 | 8.14E-07 | ZDHC5         | zinc finger, DHHC-type containing 5                       | Multiple_Complex |
| TC2200008710.hg.1 | 8.02  | 6.86  | 2.23  | 6.69E-08 | 8.22E-07 | JOSD1         | Josephin domain containing 1                              | Multiple_Complex |
| TC1900011650.hg.1 | 10.32 | 11.62 | -2.47 | 6.70E-08 | 8.22E-07 | ARHGEF18      | Rho/Rac guanine nucleotide exchange factor 18             | Multiple_Complex |
| TC0200010790.hg.1 | 5.52  | 6.71  | -2.28 | 6.76E-08 | 8.29E-07 | GPBAR1        | G protein-coupled bile acid receptor 1                    | Coding           |
| TC0100013072.hg.1 | 5.37  | 6.98  | -3.07 | 6.79E-08 | 8.33E-07 | ATP13A2       | ATPase type 13A2                                          | Multiple_Complex |
| TC1700012304.hg.1 | 7.25  | 8.55  | -2.46 | 6.85E-08 | 8.40E-07 | COG1          | component of oligomeric golgi complex 1                   | Multiple_Complex |
| TC0100016833.hg.1 | 5.59  | 7.29  | -3.24 | 6.87E-08 | 8.41E-07 | ZBTB41        | zinc finger and BTB domain containing 41                  | Multiple_Complex |
| TC1600008928.hg.1 | 7.91  | 11.19 | -9.74 | 6.89E-08 | 8.44E-07 | NPRL3         | NPR3-like, GATOR1 complex subunit                         | Multiple_Complex |
| TC1500010422.hg.1 | 8.13  | 9.3   | -2.25 | 6.90E-08 | 8.44E-07 | IDH2          | isocitrate dehydrogenase 2 (NADP+), mitochondria          | Multiple_Complex |
| TC1900011767.hg.1 | 7.57  | 8.57  | -2    | 7.04E-08 | 8.60E-07 | BLOC1S3       | biogenesis of lysosomal organelles complex-1, subunit 3   | Multiple_Complex |
| TC0400008443.hg.1 | 9.16  | 6.31  | 7.19  | 7.12E-08 | 8.70E-07 | LARP7         | La ribonucleoprotein domain family, member 7              | Multiple_Complex |
| TC1700012120.hg.1 | 6.85  | 8.14  | -2.45 | 7.15E-08 | 8.73E-07 | OGFOD3        | 2-oxoglutarate and iron-dependent oxygenase               | Multiple_Complex |
| TC0700011519.hg.1 | 8.52  | 9.72  | -2.3  | 7.15E-08 | 8.73E-07 | STAG3L2       | stromal antigen 3-like 2 (pseudogene)                     | Multiple_Complex |
| TC0100012222.hg.1 | 7.66  | 8.93  | -2.4  | 7.25E-08 | 8.85E-07 | DESI2         | desumoylating isopeptidase 2                              | Multiple_Complex |
| TC0900009912.hg.1 | 6.6   | 7.68  | -2.12 | 7.35E-08 | 8.96E-07 | SIGMAR1       | sigma non-opioid intracellular receptor 1                 | Multiple_Complex |
| TC0600013147.hg.1 | 8.44  | 6.85  | 3.01  | 7.45E-08 | 9.07E-07 | ARHGAP18      | Rho GTPase activating protein 18                          | Multiple_Complex |
| TC0X00009007.hg.1 | 6.54  | 8.23  | -3.23 | 7.45E-08 | 9.07E-07 | PUDP          | pseudouridine 5-phosphatase                               | Multiple_Complex |
| TC0200015402.hg.1 | 12.98 | 10.92 | 4.17  | 7.53E-08 | 9.17E-07 | FAM126B       | family with sequence similarity 126, member B             | Multiple_Complex |
| TC1400010767.hg.1 | 7.81  | 8.64  | -1.77 | 7.56E-08 | 9.19E-07 | ZFYVE26       | zinc finger, FYVE domain containing 26                    | Multiple_Complex |
| TC0900009770.hg.1 | 9.01  | 7.76  | 2.37  | 7.61E-08 | 9.25E-07 | PLAA          | phospholipase A2-activating protein                       | Multiple_Complex |
| TC1800009277.hg.1 | 7.79  | 9     | -2.32 | 7.64E-08 | 9.28E-07 | PIAS2         | protein inhibitor of activated STAT 2                     | Multiple_Complex |
| TC1200007713.hg.1 | 12.26 | 13.73 | -2.78 | 7.68E-08 | 9.33E-07 | SP1           | Sp1 transcription factor                                  | Multiple_Complex |
| TC1200007418.hg.1 | 13.26 | 11.27 | 3.96  | 7.70E-08 | 9.35E-07 | ANO6          | anoctamin 6                                               | Multiple_Complex |
| TC1200010407.hg.1 | 4.3   | 6.05  | -3.38 | 7.73E-08 | 9.38E-07 | KIF21A        | kinesin family member 21A                                 | Multiple_Complex |
| TC1700007930.hg.1 | 10.21 | 7.2   | 8.02  | 7.76E-08 | 9.41E-07 | RPL27         | ribosomal protein L27                                     | Multiple_Complex |
| TC0200016026.hg.1 | 5.06  | 6.33  | -2.42 | 7.79E-08 | 9.44E-07 | NMUR1         | neuromedin U receptor 1                                   | Coding           |
| TC1900011775.hg.1 | 5.23  | 6.55  | -2.5  | 7.81E-08 | 9.46E-07 | GRWD1         | glutamate-rich WD repeat containing 1                     | Multiple_Complex |
| TC2000007386.hg.1 | 5.96  | 7.3   | -2.53 | 7.86E-08 | 9.51E-07 | PLCG1; RPL10A | phospholipase C, gamma 1; ribosomal protein L10A          | Multiple_Complex |
| TC0100010268.hg.1 | 7.72  | 9.08  | -2.57 | 7.91E-08 | 9.57E-07 | FCRL6         | Fc receptor-like 6                                        | Multiple_Complex |
| TC0800008845.hg.1 | 7.73  | 9.48  | -3.37 | 7.94E-08 | 9.60E-07 | MYC           | v-myc avian myelocytomatosis viral oncogene               | Multiple_Complex |
| TC0100012278.hg.1 | 7.42  | 5.91  | 2.84  | 7.99E-08 | 9.65E-07 | SCCPDH        | saccharopine dehydrogenase (putative)                     | Multiple_Complex |
| TC1900007110.hg.1 | 7.83  | 9.61  | -3.44 | 8.02E-08 | 9.68E-07 | RAD23A        | RAD23 homolog A, nucleotide excision repair factor        | Multiple_Complex |
| TC0700011147.hg.1 | 10.82 | 9.06  | 3.38  | 8.02E-08 | 9.68E-07 | VOPP1         | Jeck2013 ALT_ACCEPTOR, ALT_DONOR, codin                   | NonCoding        |
| TC0300013103.hg.1 | 7.83  | 6.04  | 3.45  | 8.06E-08 | 9.73E-07 | RPL22L1       | ribosomal protein L22-like 1                              | Multiple_Complex |
| TC0200010374.hg.1 | 4.87  | 5.8   | -1.9  | 8.12E-08 | 9.79E-07 | MARS2         | methionyl-tRNA synthetase 2, mitochondrial                | Coding           |
| TC0800007440.hg.1 | 9.71  | 7.82  | 3.69  | 8.16E-08 | 9.83E-07 | VDAC3         | voltage-dependent anion channel 3                         | Multiple_Complex |
| TC0X00007190.hg.1 | 6.58  | 7.7   | -2.18 | 8.18E-08 | 9.85E-07 | PORCN         | porcupine homolog (Drosophila)                            | Multiple_Complex |
| TC0500013155.hg.1 | 13.83 | 11.32 | 5.68  | 8.28E-08 | 9.96E-07 | BASP1         | brain abundant, membrane attached signal protein          | Coding           |
| TC1100011184.hg.1 | 11.39 | 9.7   | 3.24  | 8.28E-08 | 9.96E-07 | SF1           | Memczak2013 ALT_ACCEPTOR, ALT_DONOR, codin                | NonCoding        |
| TC0400010965.hg.1 | 9.19  | 10.2  | -2.01 | 8.33E-08 | 1.00E-06 | GRSF1         | G-rich RNA sequence binding factor 1                      | Multiple_Complex |
| TC0500012956.hg.1 | 10.63 | 9.01  | 3.09  | 8.36E-08 | 1.00E-06 | HK3           | hexokinase 3 (white cell)                                 | Multiple_Complex |
| TC1600007354.hg.1 | 10.58 | 11.94 | -2.56 | 8.38E-08 | 1.01E-06 | EIF3C; EIF3D  | eukaryotic translation initiation factor 3, subunit C     | Multiple_Complex |
| TC0100014152.hg.1 | 7.41  | 8.41  | -1.99 | 8.39E-08 | 1.01E-06 | FAF1          | Fas (TNFRSF6) associated factor 1                         | Multiple_Complex |
| TC1200007647.hg.1 | 8.32  | 6.78  | 2.91  | 8.49E-08 | 1.02E-06 | ACVR1B        | activin A receptor type IB                                | Multiple_Complex |
| TC1300008272.hg.1 | 7.66  | 6.38  | 2.44  | 8.52E-08 | 1.02E-06 | LATS2         | large tumor suppressor kinase 2                           | Multiple_Complex |
| TC0800011116.hg.1 | 7.99  | 9.08  | -2.13 | 8.55E-08 | 1.02E-06 | RBM12B        | RNA binding motif protein 12B                             | Multiple_Complex |
| TC0500009411.hg.1 | 7.58  | 5.56  | 4.04  | 8.61E-08 | 1.03E-06 | RANBP17       | RAN binding protein 17                                    | Multiple_Complex |
| TC1100011331.hg.1 | 14.1  | 15.42 | -2.49 | 8.64E-08 | 1.03E-06 | PPP1CA        | protein phosphatase 1, catalytic subunit, alpha           | Multiple_Complex |
| TC1000011716.hg.1 | 9.93  | 7.17  | 6.78  | 8.68E-08 | 1.04E-06 | USMG5; MURK1  | up-regulated during skeletal muscle growth 5              | Multiple_Complex |
| TC0600012315.hg.1 | 7.08  | 5.92  | 2.23  | 8.69E-08 | 1.04E-06 | COX7A2        | cytochrome c oxidase subunit VIIa polypeptide             | Multiple_Complex |
| TC1200007622.hg.1 | 8.08  | 9.23  | -2.21 | 8.69E-08 | 1.04E-06 | ATF1          | activating transcription factor 1                         | Multiple_Complex |
| TC0900008516.hg.1 | 7.06  | 8.18  | -2.17 | 8.81E-08 | 1.05E-06 | C9orf91       | chromosome 9 open reading frame 91                        | Multiple_Complex |
| TC0800008279.hg.1 | 10.25 | 8.96  | 2.44  | 8.81E-08 | 1.05E-06 | PLEKHF2       | pleckstrin homology domain containing, family 2           | Multiple_Complex |
| TC0900011252.hg.1 | 9.3   | 11.05 | -3.37 | 8.82E-08 | 1.05E-06 | FKBP15        | FK506 binding protein 15                                  | Multiple_Complex |
| TC0300011383.hg.1 | 9.73  | 8.76  | 1.96  | 8.84E-08 | 1.05E-06 | PSMD6         | proteasome 26S subunit, non-ATPase 6                      | Multiple_Complex |
| TC0X00008253.hg.1 | 10.3  | 11.62 | -2.5  | 8.93E-08 | 1.06E-06 | UBE2A         | ubiquitin conjugating enzyme E2A                          | Multiple_Complex |
| TC1300008280.hg.1 | 8.19  | 6.27  | 3.79  | 9.04E-08 | 1.08E-06 | SKA3          | spindle and kinetochore associated complex subunit 3      | Multiple_Complex |
| TC0800010502.hg.1 | 14.36 | 11.3  | 8.36  | 9.18E-08 | 1.09E-06 | RPS20; SNC80  | ribosomal protein S20; small nucleolar RNA, C             | Multiple_Complex |
| TC1400010169.hg.1 | 10.85 | 9.63  | 2.32  | 9.21E-08 | 1.10E-06 | SETD3         | SET domain containing 3                                   | Multiple_Complex |
| TC0500010640.hg.1 | 5.48  | 7.19  | -3.27 | 9.22E-08 | 1.10E-06 | C5orf28       | chromosome 5 open reading frame 28                        | Multiple_Complex |
| TC0600007270.hg.1 | 14.04 | 12.26 | 3.44  | 9.23E-08 | 1.10E-06 | HIST1H2AC     | histone cluster 1, H2ac                                   | Multiple_Complex |
| TC1700011449.hg.1 | 16.15 | 14.88 | 2.41  | 9.25E-08 | 1.10E-06 | DDX5; MIR441  | DEAD (Asp-Glu-Ala-Asp) box helicase 5; microRNA-441       | Multiple_Complex |
| TC1900007679.hg.1 | 5.99  | 7.32  | -2.51 | 9.28E-08 | 1.10E-06 | PLEKHF1       | pleckstrin homology domain containing, family 1           | Coding           |
| TC1200010481.hg.1 | 8.95  | 7.74  | 2.31  | 9.30E-08 | 1.10E-06 | TWF1          | twinfilin actin binding protein 1                         | Multiple_Complex |
| TC0X00006446.hg.1 | 12.3  | 10.37 | 3.8   | 9.31E-08 | 1.10E-06 | CSF2RA        | colony stimulating factor 2 receptor, alpha, low affinity | Multiple_Complex |
| TC0100013483.hg.1 | 7.45  | 6.1   | 2.56  | 9.44E-08 | 1.12E-06 | TAF12         | TAF12 RNA polymerase II, TATA box binding protein         | Multiple_Complex |
| TC1900011750.hg.1 | 5.14  | 6.56  | -2.66 | 9.55E-08 | 1.13E-06 | ZNF155        | zinc finger protein 155                                   | Multiple_Complex |
| TC0800010765.hg.1 | 13.81 | 14.64 | -1.77 | 9.56E-08 | 1.13E-06 | TRAM1         | translocation associated membrane protein 1               | Multiple_Complex |
| TC1500008052.hg.1 | 8.02  | 8.9   | -1.83 | 9.62E-08 | 1.14E-06 | MESDC1        | mesoderm development candidate 1                          | Coding           |
| TC1100007185.hg.1 | 6.94  | 8.14  | -2.3  | 9.69E-08 | 1.15E-06 | ELP4          | elongator acetyltransferase complex subunit 4             | Multiple_Complex |

|                   |       |       |       |          |          |           |                                                  |                  |
|-------------------|-------|-------|-------|----------|----------|-----------|--------------------------------------------------|------------------|
| TC0500013191.hg.1 | 10.19 | 7.15  | 8.22  | 9.81E-08 | 1.16E-06 | NSA2      | NSA2 ribosome biogenesis homolog                 | Multiple_Complex |
| TC1700008995.hg.1 | 7.29  | 8.56  | -2.4  | 9.82E-08 | 1.16E-06 | 9-Sep     | septin 9                                         | Multiple_Complex |
| TC1600007141.hg.1 | 8.99  | 7.63  | 2.57  | 9.84E-08 | 1.16E-06 | LOC81691; | exonuclease NEF-sp; Putative RNA exonucleas      | Multiple_Complex |
| TC1100013094.hg.1 | 7.81  | 6.5   | 2.48  | 9.84E-08 | 1.16E-06 | PTS       | 6-pyruvoyltetrahydropterin synthase              | Multiple_Complex |
| TC1700010507.hg.1 | 7.2   | 6.25  | 1.93  | 9.88E-08 | 1.17E-06 | YWHAEP7   | tyrosine 3-monooxygenase/tryptophan 5-mor        | Multiple_Complex |
| TC1700010420.hg.1 | 7.35  | 8.77  | -2.67 | 9.91E-08 | 1.17E-06 | SLFN11    | schlafen family member 11                        | Multiple_Complex |
| TC1900007947.hg.1 | 5.06  | 6.31  | -2.37 | 9.97E-08 | 1.17E-06 | ZNF382    | zinc finger protein 382                          | Multiple_Complex |
| TC1700007097.hg.1 | 6.54  | 7.91  | -2.57 | 9.98E-08 | 1.17E-06 | GID4      | GID complex subunit 4 homolog                    | Multiple_Complex |
| TC1600010647.hg.1 | 6.29  | 7.2   | -1.89 | 9.99E-08 | 1.18E-06 | ACD       | adrenocortical dysplasia homolog (mouse)         | Multiple_Complex |
| TC0800007809.hg.1 | 15.12 | 13.97 | 2.21  | 1.00E-07 | 1.18E-06 | YTHDF3    | YTH N(6)-methyladenosine RNA binding prote       | Multiple_Complex |
| TC1600011401.hg.1 | 6.02  | 6.75  | -1.66 | 1.00E-07 | 1.18E-06 | COQ9      | coenzyme Q9                                      | Multiple_Complex |
| TC0400011087.hg.1 | 16.95 | 18.49 | -2.91 | 1.01E-07 | 1.19E-06 | CNI       | cyclin I                                         | Multiple_Complex |
| TC0200015225.hg.1 | 6.38  | 7.77  | -2.63 | 1.01E-07 | 1.19E-06 | HIBCH     | 3-hydroxyisobutyryl-CoA hydrolase                | Multiple_Complex |
| TC0900008219.hg.1 | 6.07  | 4.03  | 4.12  | 1.02E-07 | 1.19E-06 | NR4A3     | nuclear receptor subfamily 4, group A, membr     | Multiple_Complex |
| TC2200008827.hg.1 | 7.64  | 8.79  | -2.22 | 1.03E-07 | 1.20E-06 | TOB2      | transducer of ERBB2, 2                           | Coding           |
| TC0100016006.hg.1 | 6.04  | 6.97  | -1.89 | 1.03E-07 | 1.21E-06 | GPATCH4   | G-patch domain containing 4                      | Multiple_Complex |
| TC0900011612.hg.1 | 6.92  | 10.05 | -8.74 | 1.03E-07 | 1.21E-06 | DPM2      | dolichyl-phosphate mannosyltransferase poly      | Multiple_Complex |
| TC2200007419.hg.1 | 10.14 | 11.06 | -1.9  | 1.03E-07 | 1.21E-06 | TNRC6B    | trinucleotide repeat containing 6B               | Multiple_Complex |
| TC1900009752.hg.1 | 7.87  | 9.71  | -3.6  | 1.03E-07 | 1.21E-06 | PRDX2     | peroxiredoxin 2                                  | Multiple_Complex |
| TC1200012862.hg.1 | 8.03  | 9.25  | -2.33 | 1.03E-07 | 1.21E-06 | VPS33A    | vacuolar protein sorting 33 homolog A (S. cere   | Multiple_Complex |
| TC0100014023.hg.1 | 7.98  | 9.55  | -2.98 | 1.04E-07 | 1.21E-06 | GPBP1L1   | GC-rich promoter binding protein 1-like 1        | Multiple_Complex |
| TC0400010699.hg.1 | 7.98  | 9.13  | -2.22 | 1.04E-07 | 1.21E-06 | SCFD2     | sec1 family domain containing 2                  | Multiple_Complex |
| TC0X00011236.hg.1 | 4.96  | 6.47  | -2.86 | 1.04E-07 | 1.21E-06 | RAB39B    | Transcript Identified by AceView, Entrez Gene    | Unassigned       |
| TC0300009301.hg.1 | 6.26  | 4.8   | 2.76  | 1.04E-07 | 1.22E-06 | PTX3      | pentraxin 3, long                                | Coding           |
| TC0100008884.hg.1 | 10.61 | 8.91  | 3.26  | 1.04E-07 | 1.22E-06 | RPF1      | ribosome production factor 1 homolog             | Coding           |
| TC0300007495.hg.1 | 9.47  | 11.12 | -3.14 | 1.05E-07 | 1.22E-06 | SPCS1     | signal peptidase complex subunit 1               | Multiple_Complex |
| TC2100006982.hg.1 | 6.21  | 7.72  | -2.84 | 1.05E-07 | 1.22E-06 | LINC00649 | long intergenic non-protein coding RNA 649       | Multiple_Complex |
| TC1900007265.hg.1 | 8.09  | 7.3   | 1.73  | 1.06E-07 | 1.23E-06 | FAM32A    | family with sequence similarity 32, member A     | Coding           |
| TC0100011461.hg.1 | 6.84  | 8.31  | -2.77 | 1.06E-07 | 1.23E-06 | DIEXF     | digestive organ expansion factor homolog (zel    | Multiple_Complex |
| TC1100007426.hg.1 | 6.27  | 7.15  | -1.84 | 1.06E-07 | 1.23E-06 | SLC35C1   | solute carrier family 35 (GDP-fucose transport   | Coding           |
| TC0300011050.hg.1 | 6.92  | 8.24  | -2.48 | 1.06E-07 | 1.24E-06 | QARS; MIR | glutaminyl-tRNA synthetase; microRNA 6890        | Multiple_Complex |
| TC1900007001.hg.1 | 13.66 | 11.99 | 3.18  | 1.07E-07 | 1.24E-06 | C19orf38  | chromosome 19 open reading frame 38              | Multiple_Complex |
| TC0500009580.hg.1 | 7.44  | 8.81  | -2.6  | 1.08E-07 | 1.26E-06 | SIMC1     | SUMO-interacting motifs containing 1             | Multiple_Complex |
| TC2100008494.hg.1 | 12.86 | 14.25 | -2.63 | 1.09E-07 | 1.26E-06 | IFNAR2    | interferon (alpha, beta and omega) receptor 2    | Multiple_Complex |
| TC0500008632.hg.1 | 4.06  | 5.76  | -3.25 | 1.09E-07 | 1.27E-06 | SLC22A5   | solute carrier family 22 (organic cation/carniti | Multiple_Complex |
| TC0300013834.hg.1 | 4.64  | 5.99  | -2.55 | 1.09E-07 | 1.27E-06 | RAD54L2   | RAD54-like 2 (S. cerevisiae)                     | Multiple_Complex |
| TC1200012761.hg.1 | 6.8   | 8.05  | -2.39 | 1.10E-07 | 1.27E-06 | TAS2R31   | taste receptor, type 2, member 31                | Coding           |
| TC1700009049.hg.1 | 9.32  | 7.95  | 2.59  | 1.10E-07 | 1.28E-06 | PGS1      | phosphatidylglycerophosphate synthase 1          | Multiple_Complex |
| TC0700008010.hg.1 | 10.34 | 11.53 | -2.27 | 1.11E-07 | 1.29E-06 | GTF2I     | general transcription factor Iii                 | Multiple_Complex |
| TC2000007509.hg.1 | 14.45 | 12.33 | 4.36  | 1.12E-07 | 1.30E-06 | CTSA      | cathepsin A                                      | Multiple_Complex |
| TC1000007878.hg.1 | 5.32  | 6.73  | -2.66 | 1.13E-07 | 1.31E-06 | KIF1BP    | KIF1 binding protein                             | Multiple_Complex |
| TC0400011056.hg.1 | 9.35  | 7.84  | 2.85  | 1.14E-07 | 1.31E-06 | NUP54     | nucleoporin 54kDa                                | Multiple_Complex |
| TC1600010490.hg.1 | 10.74 | 11.99 | -2.37 | 1.14E-07 | 1.31E-06 | CNOT1; SN | CCR4-NOT transcription complex subunit 1; sn     | Multiple_Complex |
| TC0300010123.hg.1 | 10.27 | 8.61  | 3.16  | 1.14E-07 | 1.32E-06 | CRBN      | cereblon                                         | Multiple_Complex |
| TC1700008144.hg.1 | 7.69  | 9.09  | -2.66 | 1.14E-07 | 1.32E-06 | SP2       | Sp2 transcription factor                         | Multiple_Complex |
| TC1700008703.hg.1 | 7.56  | 9.11  | -2.93 | 1.16E-07 | 1.34E-06 | NOL11     | nucleolar protein 11                             | Multiple_Complex |
| TC1700011953.hg.1 | 9.74  | 8.52  | 2.34  | 1.17E-07 | 1.35E-06 | CBX4      | chromobox homolog 4                              | Multiple_Complex |
| TC0300007251.hg.1 | 5.05  | 7     | -3.86 | 1.17E-07 | 1.35E-06 | CXCR6     | chemokine (C-X-C motif) receptor 6               | Multiple_Complex |
| TC0600014060.hg.1 | 4.28  | 5.34  | -2.09 | 1.19E-07 | 1.37E-06 | PSMG4     | proteasome (prosome, macropain) assembly         | Multiple_Complex |
| TC2000009895.hg.1 | 7.02  | 5.74  | 2.42  | 1.19E-07 | 1.37E-06 | LINC00493 | long intergenic non-protein coding RNA 493       | Multiple_Complex |
| TC2100008529.hg.1 | 7.88  | 8.92  | -2.05 | 1.21E-07 | 1.39E-06 | NDUFV3    | NADH dehydrogenase (ubiquinone) flavoprote       | Multiple_Complex |
| TC1100013026.hg.1 | 6.81  | 7.86  | -2.08 | 1.21E-07 | 1.39E-06 | TTC9C     | tetratricopeptide repeat domain 9C               | NonCoding        |
| TC0100007556.hg.1 | 6.85  | 8.18  | -2.51 | 1.23E-07 | 1.41E-06 | PHACTR4   | phosphatase and actin regulator 4                | Multiple_Complex |
| TC0600008109.hg.1 | 9.93  | 8.49  | 2.72  | 1.25E-07 | 1.43E-06 | VEGFA     | vascular endothelial growth factor A             | Multiple_Complex |
| TC1000008736.hg.1 | 6.29  | 7.3   | -2.03 | 1.25E-07 | 1.43E-06 | SUFU      | suppressor of fused homolog (Drosophila)         | Multiple_Complex |
| TC1200010833.hg.1 | 7.45  | 8.6   | -2.22 | 1.25E-07 | 1.43E-06 | CBX5; MIR | chromobox homolog 5; microRNA 3198-2             | Multiple_Complex |
| TC0600007303.hg.1 | 9.32  | 11.14 | -3.54 | 1.25E-07 | 1.43E-06 | BTN3A1    | butyrophilin, subfamily 3, member A1             | Multiple_Complex |
| TC0100011276.hg.1 | 8.15  | 6.67  | 2.79  | 1.25E-07 | 1.43E-06 | SNRPE     | small nuclear ribonucleoprotein polypeptide E    | Multiple_Complex |
| TC0500010835.hg.1 | 4.92  | 3.66  | 2.4   | 1.25E-07 | 1.44E-06 | PLK2      | polo-like kinase 2                               | Multiple_Complex |
| TC0100010654.hg.1 | 7.14  | 8.09  | -1.93 | 1.26E-07 | 1.44E-06 | KLHL20    | kelch-like family member 20                      | Multiple_Complex |
| TC1900009003.hg.1 | 9.54  | 10.81 | -2.4  | 1.27E-07 | 1.45E-06 | ZNF134    | zinc finger protein 134                          | Multiple_Complex |
| TC0800011105.hg.1 | 8.48  | 7.05  | 2.7   | 1.27E-07 | 1.45E-06 | TRIQK     | triple QxxK/R motif containing                   | Multiple_Complex |
| TC1000010172.hg.1 | 8.21  | 6.91  | 2.47  | 1.27E-07 | 1.45E-06 | SVIL      | supervillin                                      | Multiple_Complex |
| TC1000009240.hg.1 | 6.27  | 7.43  | -2.24 | 1.28E-07 | 1.46E-06 | EDRF1     | erythroid differentiation regulatory factor 1    | Multiple_Complex |
| TC1800006749.hg.1 | 7.18  | 8.31  | -2.19 | 1.28E-07 | 1.47E-06 | CEP192    | centrosomal protein 192kDa                       | Multiple_Complex |
| TC0400012917.hg.1 | 8.97  | 10.64 | -3.18 | 1.29E-07 | 1.47E-06 | ARAP2     | ArfGAP with RhoGAP domain, ankyrin repeat        | Multiple_Complex |
| TC0200015336.hg.1 | 10.44 | 11.16 | -1.65 | 1.29E-07 | 1.47E-06 | ANKRD44   | ankyrin repeat domain 44                         | Multiple_Complex |
| TC0400009221.hg.1 | 8.84  | 10.26 | -2.66 | 1.29E-07 | 1.48E-06 | MSMO1     | methylsterol monooxygenase 1                     | Multiple_Complex |
| TC2200009236.hg.1 | 8.23  | 7.35  | 1.84  | 1.30E-07 | 1.48E-06 | GGT1      | gamma-glutamyltransferase 1                      | Multiple_Complex |
| TC1600008190.hg.1 | 6.83  | 8.19  | -2.58 | 1.30E-07 | 1.48E-06 | SLC7A6    | solute carrier family 7 (amino acid transporter  | Multiple_Complex |

|                   |       |       |        |          |          |            |                                                 |                  |
|-------------------|-------|-------|--------|----------|----------|------------|-------------------------------------------------|------------------|
| TC0900009654.hg.1 | 13.33 | 10.03 | 9.85   | 1.32E-07 | 1.50E-06 | RPS6       | ribosomal protein S6                            | Multiple_Complex |
| TC0400011421.hg.1 | 8.74  | 7.12  | 3.09   | 1.32E-07 | 1.50E-06 | LAMTOR3    | late endosomal/lysosomal adaptor, MAPK anc      | Multiple_Complex |
| TC0600014101.hg.1 | 6.75  | 7.92  | -2.25  | 1.32E-07 | 1.50E-06 | MICA       | MHC class I polypeptide-related sequence A      | Coding           |
| TC1600007312.hg.1 | 12.9  | 10.59 | 4.93   | 1.32E-07 | 1.50E-06 | IL4R       | interleukin 4 receptor                          | Multiple_Complex |
| TC1700012263.hg.1 | 11.75 | 10.56 | 2.27   | 1.32E-07 | 1.50E-06 | DHX8       | DEAH (Asp-Glu-Ala-His) box polypeptide 8        | Multiple_Complex |
| TC0600010817.hg.1 | 6.11  | 7.43  | -2.51  | 1.32E-07 | 1.50E-06 | NEDD9      | Memczak2013 ALT_ACCEPTOR, ALT_DONOR,            | NonCoding        |
| TC1500010251.hg.1 | 6.95  | 5.68  | 2.42   | 1.33E-07 | 1.50E-06 | HOMER2     | homer scaffolding protein 2                     | Multiple_Complex |
| TC1400010628.hg.1 | 4.61  | 5.64  | -2.04  | 1.34E-07 | 1.52E-06 | YLPM1      | YLP motif containing 1                          | NonCoding        |
| TC1300009994.hg.1 | 10.32 | 11.24 | -1.89  | 1.35E-07 | 1.52E-06 | ERCC5      | excision repair cross-complementation group     | Multiple_Complex |
| TC0300009010.hg.1 | 9.76  | 8.73  | 2.04   | 1.35E-07 | 1.53E-06 | RNF7       | ring finger protein 7                           | Multiple_Complex |
| TC0200007702.hg.1 | 9.72  | 11    | -2.44  | 1.36E-07 | 1.54E-06 | PAPOLG     | poly(A) polymerase gamma                        | Multiple_Complex |
| TC0200006536.hg.1 | 12.8  | 8.21  | 24.04  | 1.36E-07 | 1.54E-06 | RPS7       | ribosomal protein S7                            | Multiple_Complex |
| TC1400009548.hg.1 | 7.88  | 5.9   | 3.94   | 1.36E-07 | 1.54E-06 | ERH        | enhancer of rudimentary homolog (Drosophila)    | Multiple_Complex |
| TC1100012686.hg.1 | 8.4   | 6.52  | 3.66   | 1.36E-07 | 1.54E-06 | ESAM       | endothelial cell adhesion molecule              | Multiple_Complex |
| TC1100007050.hg.1 | 5.94  | 7.28  | -2.53  | 1.36E-07 | 1.54E-06 | PRMT3      | protein arginine methyltransferase 3            | Multiple_Complex |
| TC0200016578.hg.1 | 5.74  | 6.92  | -2.26  | 1.37E-07 | 1.55E-06 | NUP35      | nucleoporin 35kDa                               | Multiple_Complex |
| TC1400010576.hg.1 | 11.46 | 10.6  | 1.83   | 1.37E-07 | 1.55E-06 | PABPN1     | poly(A) binding protein, nuclear 1              | Multiple_Complex |
| TC0100014340.hg.1 | 5.79  | 4.52  | 2.41   | 1.37E-07 | 1.55E-06 | TACSTD2    | tumor-associated calcium signal transducer 2    | Coding           |
| TC0300008849.hg.1 | 6.52  | 7.84  | -2.5   | 1.37E-07 | 1.55E-06 | UBA5       | ubiquitin-like modifier activating enzyme 5     | Multiple_Complex |
| TC0200008930.hg.1 | 8.42  | 9.89  | -2.78  | 1.38E-07 | 1.55E-06 | SLC20A1    | solute carrier family 20 (phosphate transporte  | Multiple_Complex |
| TC1700008151.hg.1 | 8.99  | 9.84  | -1.8   | 1.39E-07 | 1.57E-06 | NFE2L1     | nuclear factor, erythroid 2-like 1              | Multiple_Complex |
| TC0500013414.hg.1 | 7.19  | 8.62  | -2.7   | 1.42E-07 | 1.60E-06 | THOC3      | THO complex 3                                   | Multiple_Complex |
| TC0100015194.hg.1 | 10.73 | 8.97  | 3.39   | 1.42E-07 | 1.60E-06 | SORT1      | sortilin 1                                      | Multiple_Complex |
| TC0X00010642.hg.1 | 4.67  | 5.95  | -2.43  | 1.43E-07 | 1.61E-06 | NKRF       | NFKB repressing factor                          | Multiple_Complex |
| TC1700010826.hg.1 | 5.56  | 9.19  | -12.32 | 1.44E-07 | 1.61E-06 | SLC25A39   | solute carrier family 25, member 39             | Multiple_Complex |
| TC0700012849.hg.1 | 6.85  | 5.32  | 2.89   | 1.45E-07 | 1.63E-06 | CLEC5A     | C-type lectin domain family 5, member A         | Multiple_Complex |
| TC1100008010.hg.1 | 7.3   | 8.21  | -1.88  | 1.45E-07 | 1.63E-06 | CDC42EP2   | CDC42 effector protein (Rho GTPase binding)     | Multiple_Complex |
| TC2200009157.hg.1 | 6.02  | 7.2   | -2.27  | 1.45E-07 | 1.63E-06 | SBF1       | SET binding factor 1                            | Multiple_Complex |
| TC1500007238.hg.1 | 6.15  | 7.41  | -2.39  | 1.45E-07 | 1.63E-06 | TMOD2      | tropomodulin 2 (neuronal)                       | Multiple_Complex |
| TC0200016669.hg.1 | 7.21  | 8.16  | -1.93  | 1.45E-07 | 1.63E-06 | ASB3       | ankyrin repeat and SOCS box containing 3        | Multiple_Complex |
| TC0700012797.hg.1 | 9.53  | 12.79 | -9.56  | 1.46E-07 | 1.63E-06 | PARP12     | poly(ADP-ribose) polymerase family member       | Multiple_Complex |
| TC0200007628.hg.1 | 10.73 | 7.91  | 7.06   | 1.46E-07 | 1.64E-06 | RPS27A     | ribosomal protein S27a                          | Multiple_Complex |
| TC0700007198.hg.1 | 6.6   | 5.57  | 2.05   | 1.47E-07 | 1.65E-06 | ANLN       | anillin actin binding protein                   | Multiple_Complex |
| TC1600011442.hg.1 | 12.28 | 10.87 | 2.67   | 1.47E-07 | 1.65E-06 | MAP1LC3B   | microtubule-associated protein 1 light chain 3  | Multiple_Complex |
| TC1700008102.hg.1 | 9.03  | 10.83 | -3.5   | 1.48E-07 | 1.65E-06 | LRRC37A2   | leucine rich repeat containing 37, member A2    | Multiple_Complex |
| TC0700011782.hg.1 | 8.7   | 7.33  | 2.59   | 1.48E-07 | 1.65E-06 | FAM133B    | family with sequence similarity 133, member     | Multiple_Complex |
| TC0500011173.hg.1 | 6.1   | 7.54  | -2.7   | 1.48E-07 | 1.65E-06 | POC5       | POC5 centriolar protein                         | Multiple_Complex |
| TC0700013080.hg.1 | 10.26 | 8.57  | 3.24   | 1.50E-07 | 1.67E-06 | RHEB       | Ras homolog enriched in brain                   | Multiple_Complex |
| TC1600011228.hg.1 | 4.53  | 5.66  | -2.19  | 1.50E-07 | 1.68E-06 | PIEZO1     | piezo-type mechanosensitive ion channel com     | Multiple_Complex |
| TC2000008678.hg.1 | 10.58 | 13.03 | -5.46  | 1.51E-07 | 1.69E-06 | CST3       | cystatin C                                      | Multiple_Complex |
| TC1400009410.hg.1 | 6.98  | 8.76  | -3.42  | 1.52E-07 | 1.69E-06 | ZBTB25     | zinc finger and BTB domain containing 25        | Multiple_Complex |
| TC0400012769.hg.1 | 13.85 | 12.21 | 3.12   | 1.54E-07 | 1.72E-06 | BST1       | bone marrow stromal cell antigen 1              | Multiple_Complex |
| TC1100012974.hg.1 | 12.29 | 10.95 | 2.53   | 1.56E-07 | 1.73E-06 | C11orf58   | chromosome 11 open reading frame 58             | Multiple_Complex |
| TC1900012046.hg.1 | 8.3   | 7.36  | 1.92   | 1.57E-07 | 1.74E-06 | RDH13      | retinol dehydrogenase 13 (all-trans/9-cis)      | Multiple_Complex |
| TC1000009065.hg.1 | 5.57  | 7.02  | -2.72  | 1.60E-07 | 1.78E-06 | FAM45A     | Transcript Identified by AceView, Entrez Gene   | Unassigned       |
| TC1800009242.hg.1 | 6.08  | 4.61  | 2.77   | 1.60E-07 | 1.78E-06 | SERPINB2   | serpin peptidase inhibitor, clade B (ovalbumin  | Multiple_Complex |
| TC0500012059.hg.1 | 8.74  | 9.86  | -2.18  | 1.60E-07 | 1.78E-06 | VDAC1      | voltage-dependent anion channel 1               | Multiple_Complex |
| TC0100013013.hg.1 | 5.38  | 4.25  | 2.19   | 1.62E-07 | 1.80E-06 | UQCRHL     | ubiquinol-cytochrome c reductase hinge prote    | Multiple_Complex |
| TC2000009447.hg.1 | 8.58  | 6.85  | 3.31   | 1.63E-07 | 1.81E-06 | DPM1       | dolichyl-phosphate mannosyltransferase polyj    | Multiple_Complex |
| TC1200011311.hg.1 | 14.14 | 12.6  | 2.9    | 1.63E-07 | 1.81E-06 | NAP1L1     | nucleosome assembly protein 1-like 1            | Multiple_Complex |
| TC0100011192.hg.1 | 8.25  | 9.54  | -2.45  | 1.64E-07 | 1.81E-06 | IPO9       | importin 9                                      | Multiple_Complex |
| TC0300008561.hg.1 | 11.61 | 15.37 | -13.55 | 1.64E-07 | 1.82E-06 | PARP14     | poly(ADP-ribose) polymerase family member       | Multiple_Complex |
| TC1600007335.hg.1 | 3.65  | 4.76  | -2.17  | 1.65E-07 | 1.83E-06 | SBK1       | SH3 domain binding kinase 1                     | Multiple_Complex |
| TC1900011683.hg.1 | 6.76  | 8.43  | -3.18  | 1.66E-07 | 1.83E-06 | HSH2D      | hematopoietic SH2 domain containing             | Multiple_Complex |
| TC0700007024.hg.1 | 10.64 | 8.64  | 3.98   | 1.66E-07 | 1.84E-06 | TAX1BP1    | Tax1 (human T-cell leukemia virus type I) bind  | Multiple_Complex |
| TC1700010859.hg.1 | 7.23  | 9     | -3.41  | 1.66E-07 | 1.84E-06 | DCAKD      | dephospho-CoA kinase domain containing          | Multiple_Complex |
| TC0200009428.hg.1 | 11.06 | 12.27 | -2.31  | 1.67E-07 | 1.84E-06 | CCNT2      | cyclin T2                                       | Multiple_Complex |
| TC0100017472.hg.1 | 7.58  | 6.72  | 1.82   | 1.67E-07 | 1.84E-06 | WDR26      | Transcript Identified by AceView, Entrez Gene   | Unassigned       |
| TC0400008912.hg.1 | 5.97  | 6.9   | -1.9   | 1.68E-07 | 1.85E-06 | MMAA       | methylmalonic aciduria (cobalamin deficiency    | Multiple_Complex |
| TC1900012007.hg.1 | 8     | 9.03  | -2.04  | 1.70E-07 | 1.87E-06 | NUP62; IL4 | nucleoporin 62kDa; interleukin 4 induced 1      | Multiple_Complex |
| TC1300007483.hg.1 | 5.72  | 6.86  | -2.2   | 1.70E-07 | 1.87E-06 | BORA       | bora, aurora kinase A activator                 | Multiple_Complex |
| TC1700008690.hg.1 | 8.57  | 10.09 | -2.86  | 1.70E-07 | 1.87E-06 | PITPNC1    | phosphatidylinositol transfer protein, cytoplas | Multiple_Complex |
| TC1900011816.hg.1 | 5.07  | 6.48  | -2.65  | 1.71E-07 | 1.88E-06 | ZNF419     | zinc finger protein 419                         | Multiple_Complex |
| TC0300012323.hg.1 | 7.69  | 5.63  | 4.18   | 1.74E-07 | 1.91E-06 | MGLL       | monoglyceride lipase                            | Multiple_Complex |
| TC2200008594.hg.1 | 13.68 | 11.71 | 3.93   | 1.75E-07 | 1.92E-06 | MYH9       | myosin, heavy chain 9, non-muscle               | Multiple_Complex |
| TC1900011668.hg.1 | 5.9   | 7.16  | -2.4   | 1.75E-07 | 1.93E-06 | ZNF763     | zinc finger protein 763                         | Coding           |
| TC1400007170.hg.1 | 6.86  | 4.99  | 3.63   | 1.76E-07 | 1.93E-06 | PSMC6      | proteasome 26S subunit, ATPase 6                | Multiple_Complex |
| TC1500008167.hg.1 | 9.49  | 10.85 | -2.57  | 1.76E-07 | 1.93E-06 | ZNF592     | zinc finger protein 592                         | Multiple_Complex |
| TC0X00006614.hg.1 | 10.58 | 8.68  | 3.73   | 1.76E-07 | 1.94E-06 | MSL3       | male-specific lethal 3 homolog (Drosophila)     | Multiple_Complex |
| TC1800009243.hg.1 | 6.12  | 4.82  | 2.47   | 1.77E-07 | 1.94E-06 | SERPINB10  | serpin peptidase inhibitor, clade B (ovalbumin  | Multiple_Complex |



|                      |       |       |       |          |                              |                                                   |                  |
|----------------------|-------|-------|-------|----------|------------------------------|---------------------------------------------------|------------------|
| TC1400010717.hg.1    | 6.24  | 7.57  | -2.52 | 1.78E-07 | 1.95E-06 PPP1R3E             | protein phosphatase 1, regulatory subunit 3E      | Multiple_Complex |
| TC1700010960.hg.1    | 5.75  | 6.62  | -1.83 | 1.81E-07 | 1.99E-06 MRPL10              | mitochondrial ribosomal protein L10               | Multiple_Complex |
| TC2000010027.hg.1    | 11.12 | 11.98 | -1.81 | 1.83E-07 | 2.01E-06 TMEM189             | TMEM189-UBE2V1 readthrough                        | Multiple_Complex |
| TC1600007531.hg.1    | 12.97 | 11.02 | 3.87  | 1.84E-07 | 2.01E-06 ITGAX               | integrin alpha X                                  | Multiple_Complex |
| TC0700008867.hg.1    | 10.28 | 8.64  | 3.12  | 1.84E-07 | 2.01E-06 PSMC2               | proteasome 26S subunit, ATPase 2                  | Multiple_Complex |
| TC0500012162.hg.1    | 6.63  | 7.75  | -2.18 | 1.85E-07 | 2.02E-06 BRD8                | bromodomain containing 8                          | Multiple_Complex |
| TC2000009914.hg.1    | 6.29  | 7.7   | -2.67 | 1.85E-07 | 2.02E-06 TGIF2               | TGFB-induced factor homeobox 2                    | Multiple_Complex |
| TC1200012234.hg.1    | 8.38  | 7.11  | 2.41  | 1.85E-07 | 2.03E-06 CLIP1               | CAP-GLY domain containing linker protein 1        | Multiple_Complex |
| TC1100008792.hg.1    | 7.99  | 9     | -2.02 | 1.88E-07 | 2.05E-06 MED17               | mediator complex subunit 17                       | Multiple_Complex |
| TC1400010257.hg.1    | 11.46 | 8.75  | 6.56  | 1.88E-07 | 2.05E-06 HSP90AA1            | heat shock protein 90kDa alpha (cytosolic), cl    | Multiple_Complex |
| TC0600012647.hg.1    | 8.1   | 9.38  | -2.43 | 1.89E-07 | 2.06E-06 FBXL4               | F-box and leucine-rich repeat protein 4           | Multiple_Complex |
| TC0300013826.hg.1    | 4.56  | 5.6   | -2.05 | 1.90E-07 | 2.08E-06 P4HTM               | prolyl 4-hydroxylase, transmembrane (endopl       | Multiple_Complex |
| TC1900011327.hg.1    | 6.94  | 7.88  | -1.93 | 1.92E-07 | 2.09E-06 ZNF160              | zinc finger protein 160                           | Multiple_Complex |
| TC1100009203.hg.1    | 10.09 | 11.69 | -3.03 | 1.93E-07 | 2.11E-06 UBE4A               | ubiquitination factor E4A                         | Multiple_Complex |
| TC1000007199.hg.1    | 10.48 | 8.51  | 3.92  | 1.93E-07 | 2.11E-06 ZEB1                | zinc finger E-box binding homeobox 1              | Multiple_Complex |
| TC0400007495.hg.1    | 7.58  | 5.48  | 4.29  | 1.94E-07 | 2.11E-06 DCUN1D4             | DCN1, defective in cullin neddylation 1, doma     | Multiple_Complex |
| TC0300008352.hg.1    | 6.42  | 7.85  | -2.69 | 1.94E-07 | 2.11E-06 GTPBP8              | GTP-binding protein 8 (putative)                  | Multiple_Complex |
| TC0200008806.hg.1    | 11.23 | 9.49  | 3.34  | 1.95E-07 | 2.12E-06 LIMS1               | LIM and senescent cell antigen-like domains 1     | Multiple_Complex |
| TC1500006956.hg.1    | 5.39  | 6.42  | -2.05 | 1.95E-07 | 2.12E-06 BAHD1               | bromo adjacent homology domain containing         | Multiple_Complex |
| TC0100017267.hg.1    | 8.24  | 9.21  | -1.96 | 1.96E-07 | 2.13E-06 ANGEL2              | angel homolog 2 (Drosophila)                      | Multiple_Complex |
| TC0X00009981.hg.1    | 15.72 | 17.17 | -2.72 | 1.97E-07 | 2.14E-06 IL2RG               | interleukin 2 receptor, gamma                     | Multiple_Complex |
| TC1600007893.hg.1    | 8.45  | 9.55  | -2.15 | 1.98E-07 | 2.15E-06 FTO                 | fat mass and obesity associated                   | Multiple_Complex |
| TC1200012752.hg.1    | 6.19  | 9.07  | -7.35 | 1.98E-07 | 2.15E-06 KLRC3               | killer cell lectin-like receptor subfamily C, men | Coding           |
| TC0500008863.hg.1    | 11.69 | 10.11 | 2.99  | 1.98E-07 | 2.15E-06 IK; MIR365          | IK cytokine, down-regulator of HLA II; microRN    | Multiple_Complex |
| TC2200008832.hg.1    | 6.04  | 7.21  | -2.25 | 1.98E-07 | 2.15E-06 DESI1               | desumoylating isopeptidase 1                      | Multiple_Complex |
| TC0100011873.hg.1    | 7.2   | 8.42  | -2.34 | 2.00E-07 | 2.17E-06 RNF187              | ring finger protein 187                           | Multiple_Complex |
| TC0800009764.hg.1    | 5.1   | 3.93  | 2.24  | 2.01E-07 | 2.18E-06 PSD3                | pleckstrin and Sec7 domain containing 3           | Multiple_Complex |
| TC0100013676.hg.1    | 7.68  | 8.6   | -1.89 | 2.02E-07 | 2.18E-06 ZMYM6NB; ZMYM6      | neighbor; zinc finger, MYM-type 6                 | Multiple_Complex |
| TC1600011045.hg.1    | 8.88  | 10.17 | -2.45 | 2.02E-07 | 2.19E-06 MBTPS1              | membrane bound transcription factor peptida       | Multiple_Complex |
| TC0100014579.hg.1    | 7.91  | 9.54  | -3.1  | 2.04E-07 | 2.20E-06 ZRANB2              | zinc finger, RAN-binding domain containing 2      | Multiple_Complex |
| TC1400007500.hg.1    | 5     | 3.79  | 2.32  | 2.04E-07 | 2.20E-06 ARG2                | arginase 2                                        | Multiple_Complex |
| TC1900008986.hg.1    | 8.86  | 9.71  | -1.81 | 2.04E-07 | 2.20E-06 ZNF264              | zinc finger protein 264                           | Coding           |
| TC2200008411.hg.1    | 9.23  | 11.41 | -4.54 | 2.06E-07 | 2.22E-06 ASCC2               | activating signal cointegrator 1 complex subur    | Multiple_Complex |
| TC0100011777.hg.1    | 18.32 | 16.84 | 2.78  | 2.08E-07 | 2.25E-06 H3F3A; H3F3B; H3F3C | H3 histone, family 3A; H3 histone, family 3A, f   | Multiple_Complex |
| TC0200014414.hg.1    | 17.4  | 15.5  | 3.75  | 2.09E-07 | 2.25E-06 CXCR4               | chemokine (C-X-C motif) receptor 4                | Multiple_Complex |
| TC0700010716.hg.1    | 10.23 | 8.57  | 3.16  | 2.09E-07 | 2.25E-06 DPY19L1             | dpy-19-like 1 (C. elegans)                        | Multiple_Complex |
| TC0900009470.hg.1    | 6.73  | 8.1   | -2.59 | 2.11E-07 | 2.27E-06 ERMP1               | endoplasmic reticulum metalloproteinase 1         | Multiple_Complex |
| TC1900010023.hg.1    | 8.45  | 10.51 | -4.15 | 2.12E-07 | 2.28E-06 FKBP8               | FK506 binding protein 8                           | Multiple_Complex |
| TC0400012620.hg.1    | 6.67  | 5.28  | 2.62  | 2.13E-07 | 2.29E-06 CENPU               | centromere protein U                              | Multiple_Complex |
| TC0500012497.hg.1    | 11.95 | 10.55 | 2.64  | 2.14E-07 | 2.30E-06 TNIP1               | TNFAIP3 interacting protein 1                     | Multiple_Complex |
| TC0600007301.hg.1    | 10.81 | 13.2  | -5.23 | 2.14E-07 | 2.30E-06 BTN3A2              | butyrophilin, subfamily 3, member A2              | Multiple_Complex |
| TC0300008346.hg.1    | 7.18  | 8.85  | -3.18 | 2.17E-07 | 2.33E-06 SLC35A5             | solute carrier family 35, member A5               | Multiple_Complex |
| TC1500009159.hg.1    | 6.75  | 7.81  | -2.08 | 2.18E-07 | 2.34E-06 RPAP1               | RNA polymerase II associated protein 1            | Multiple_Complex |
| TC0200014991.hg.1    | 8.45  | 9.86  | -2.66 | 2.18E-07 | 2.34E-06 GPR155              | G protein-coupled receptor 155                    | Multiple_Complex |
| TC0900012163.hg.1    | 5.55  | 4.51  | 2.05  | 2.19E-07 | 2.35E-06 ORM2                | orosomucoid 2                                     | Multiple_Complex |
| TC1900012057.hg.1    | 5.64  | 6.88  | -2.37 | 2.19E-07 | 2.35E-06 ZNF814              | zinc finger protein 814                           | Multiple_Complex |
| TC1300007884.hg.1    | 8.88  | 10.53 | -3.13 | 2.19E-07 | 2.35E-06 TPP2                | tripeptidyl peptidase II                          | Multiple_Complex |
| TC1900010743.hg.1    | 14.18 | 12.73 | 2.73  | 2.20E-07 | 2.35E-06 TGFBI               | transforming growth factor beta 1                 | Multiple_Complex |
| TC1200009910.hg.1    | 4.44  | 5.82  | -2.6  | 2.20E-07 | 2.36E-06 KLRAP1              | killer cell lectin-like receptor subfamily A pseu | Multiple_Complex |
| TC0400006808.hg.1    | 5.47  | 4.13  | 2.54  | 2.21E-07 | 2.36E-06 USP17L22            | ubiquitin specific peptidase 17-like family mer   | Coding           |
| TC2000008299.hg.1    | 10.83 | 9.45  | 2.6   | 2.21E-07 | 2.37E-06 GPCPD1              | Transcript Identified by AceView, Entrez Gene     | Unassigned       |
| TC1900011733.hg.1    | 7.44  | 8.93  | -2.82 | 2.23E-07 | 2.39E-06 RAB4B; MIA-R        | RAB4B, member RAS oncogene family; MIA-R          | Multiple_Complex |
| TC1900009608.hg.1    | 8.64  | 10    | -2.57 | 2.25E-07 | 2.40E-06 EIF3G               | eukaryotic translation initiation factor 3, subu  | Multiple_Complex |
| TC1700010447.hg.1    | 16.47 | 18.48 | -4.05 | 2.25E-07 | 2.40E-06 CCL5                | chemokine (C-C motif) ligand 5                    | Coding           |
| TC0400012310.hg.1    | 9.08  | 10.85 | -3.42 | 2.26E-07 | 2.41E-06 RNF188              | membrane associated ring finger 1                 | Multiple_Complex |
| TC1900007173.hg.1    | 15.76 | 14.24 | 2.87  | 2.28E-07 | 2.44E-06 ADGRE5              | adhesion G protein-coupled receptor E5            | Multiple_Complex |
| TC0100018477.hg.1    | 9.07  | 8.08  | 1.98  | 2.32E-07 | 2.47E-06 RBM8A               | RNA binding motif protein 8A                      | Multiple_Complex |
| TC1700007361.hg.1    | 5.52  | 6.39  | -1.82 | 2.32E-07 | 2.47E-06 TNFAIP1             | tumor necrosis factor, alpha-induced protein      | Multiple_Complex |
| TC1600011347.hg.1    | 4.89  | 5.79  | -1.88 | 2.33E-07 | 2.49E-06 ALG1; NAG           | ALG1, chitobiosylidiphosphodolichol beta-man      | Multiple_Complex |
| TC1100013050.hg.1    | 6.78  | 8.27  | -2.82 | 2.34E-07 | 2.49E-06 RBM14               | RNA binding motif protein 14                      | Multiple_Complex |
| TC0800009208.hg.1    | 4.91  | 6.04  | -2.19 | 2.35E-07 | 2.50E-06 ZNF623              | zinc finger protein 623                           | Coding           |
| TC0100012602.hg.1    | 8.48  | 9.72  | -2.36 | 2.37E-07 | 2.52E-06 CEP104              | centrosomal protein 104kDa                        | Multiple_Complex |
| TC0200013943.hg.1    | 7.91  | 9.33  | -2.68 | 2.39E-07 | 2.54E-06 SLC35F5             | solute carrier family 35, member F5               | Multiple_Complex |
| TC0400007572.hg.1    | 9.21  | 10.46 | -2.37 | 2.41E-07 | 2.56E-06 EXOC1               | exocyst complex component 1                       | Multiple_Complex |
| TC0200014736.hg.1    | 6.39  | 7.93  | -2.89 | 2.41E-07 | 2.56E-06 RBMS1               | Jeck2013 ALT_ACCEPTOR, ALT_DONOR, codin           | NonCoding        |
| TC0X00008945.hg.1    | 6.94  | 8.8   | -3.63 | 2.45E-07 | 2.60E-06 PRKX                | protein kinase, X-linked                          | Multiple_Complex |
| TC0600014103.hg.1    | 6.76  | 5.45  | 2.48  | 2.47E-07 | 2.62E-06 LY6G6F              | lymphocyte antigen 6 complex, locus G6F           | Coding           |
| TC0700011556.hg.1    | 7.58  | 6.5   | 2.12  | 2.47E-07 | 2.62E-06 HIP1                | huntingtin interacting protein 1                  | Multiple_Complex |
| TC0300006993.hg.1    | 10.62 | 12.03 | -2.66 | 2.48E-07 | 2.63E-06 CRTAP               | cartilage associated protein                      | Multiple_Complex |
| TSunmapped00000135.h | 11.72 | 12.66 | -1.91 | 2.49E-07 | 2.64E-06 INPP5D              | inositol polyphosphate-5-phosphatase D            | Coding           |

|                      |       |       |        |          |          |            |                                                |                  |
|----------------------|-------|-------|--------|----------|----------|------------|------------------------------------------------|------------------|
| TC1700012289.hg.1    | 6.57  | 5.38  | 2.29   | 2.55E-07 | 2.70E-06 | CA4        | carbonic anhydrase IV                          | Multiple_Complex |
| TC1700012437.hg.1    | 10.59 | 11.55 | -1.95  | 2.58E-07 | 2.73E-06 | SRSF1      | serine/arginine-rich splicing factor 1         | Multiple_Complex |
| TC0700006977.hg.1    | 5.4   | 6.67  | -2.42  | 2.58E-07 | 2.73E-06 | NFE2L3     | nuclear factor, erythroid 2-like 3             | Multiple_Complex |
| TC0100012601.hg.1    | 8.12  | 9.07  | -1.93  | 2.59E-07 | 2.74E-06 | LRRC47     | leucine rich repeat containing 47              | Multiple_Complex |
| TC0200007854.hg.1    | 6.51  | 4.94  | 2.98   | 2.59E-07 | 2.74E-06 | MEIS1      | Meis homeobox 1                                | Multiple_Complex |
| TC0300007387.hg.1    | 6.83  | 8.53  | -3.24  | 2.59E-07 | 2.74E-06 | RNF123     | ring finger protein 123                        | Multiple_Complex |
| TC1200007701.hg.1    | 6.84  | 8.15  | -2.47  | 2.59E-07 | 2.74E-06 | ZNF740     | zinc finger protein 740                        | Multiple_Complex |
| TC2000008237.hg.1    | 8.98  | 11.99 | -8.02  | 2.61E-07 | 2.75E-06 | MAVS       | Jeck2013 ANTISENSE, coding, INTERNAL, OVE      | NonCoding        |
| TC1000012427.hg.1    | 5.66  | 4.36  | 2.46   | 2.63E-07 | 2.77E-06 | AKR1C1     | aldo-keto reductase family 1, member C1        | Multiple_Complex |
| TC1200007804.hg.1    | 5.46  | 4.71  | 1.68   | 2.64E-07 | 2.79E-06 | METTL7B    | methyltransferase like 7B                      | Multiple_Complex |
| TC1200007954.hg.1    | 12.93 | 10.74 | 4.56   | 2.64E-07 | 2.79E-06 | USP15; MIF | ubiquitin specific peptidase 15; microRNA 612  | Multiple_Complex |
| TC1700009256.hg.1    | 11.66 | 9.85  | 3.51   | 2.68E-07 | 2.82E-06 | NARF       | nuclear prelamin A recognition factor          | Multiple_Complex |
| TC0900009164.hg.1    | 7.52  | 9     | -2.79  | 2.69E-07 | 2.83E-06 | MRPS2      | mitochondrial ribosomal protein S2             | Multiple_Complex |
| TC0100013636.hg.1    | 12.54 | 11.15 | 2.62   | 2.70E-07 | 2.85E-06 | RNF19B     | ring finger protein 19B                        | Multiple_Complex |
| TC0600014332.hg.1    | 5.66  | 7.1   | -2.72  | 2.73E-07 | 2.87E-06 | ZBTB24     | zinc finger and BTB domain containing 24       | Multiple_Complex |
| TC0400012754.hg.1    | 6.94  | 8.28  | -2.53  | 2.75E-07 | 2.89E-06 | ZNF141     | zinc finger protein 141                        | Multiple_Complex |
| TC0200013046.hg.1    | 5.6   | 6.63  | -2.05  | 2.75E-07 | 2.89E-06 | EXOC6B     | exocyst complex component 6B                   | Multiple_Complex |
| TC1000010026.hg.1    | 6.08  | 7.26  | -2.27  | 2.76E-07 | 2.89E-06 | PIP4K2A    | phosphatidylinositol-5-phosphate 4-kinase, ty  | NonCoding        |
| TC0700009399.hg.1    | 4.97  | 6.17  | -2.31  | 2.76E-07 | 2.90E-06 | TAS2R4     | taste receptor, type 2, member 4               | Coding           |
| TC1500007979.hg.1    | 8.85  | 6.14  | 6.54   | 2.76E-07 | 2.90E-06 | PSMA4      | proteasome subunit alpha 4                     | Multiple_Complex |
| TC0200016543.hg.1    | 7.73  | 8.95  | -2.33  | 2.77E-07 | 2.90E-06 | RIF1       | replication timing regulatory factor 1         | Multiple_Complex |
| TC0200016418.hg.1    | 6.44  | 7.47  | -2.05  | 2.77E-07 | 2.90E-06 | ZNF512     | zinc finger protein 512                        | Multiple_Complex |
| TC0800011005.hg.1    | 5.57  | 4.17  | 2.65   | 2.81E-07 | 2.95E-06 | REXO1L2P   | REX1, RNA exonuclease 1 homolog-like 2, pse    | Multiple_Complex |
| TC0400009978.hg.1    | 5.99  | 7.04  | -2.07  | 2.82E-07 | 2.95E-06 | ACOX3      | acyl-CoA oxidase 3, pristanoyl                 | Multiple_Complex |
| TC2200007037.hg.1    | 11.27 | 9.59  | 3.21   | 2.83E-07 | 2.96E-06 | MTMR3      | myotubularin related protein 3                 | Multiple_Complex |
| TC1700010820.hg.1    | 8.35  | 13.26 | -29.97 | 2.85E-07 | 2.98E-06 | SLC4A1     | solute carrier family 4 (anion exchanger), men | Multiple_Complex |
| TC1100008827.hg.1    | 7.03  | 7.99  | -1.95  | 2.85E-07 | 2.98E-06 | SRSF8      | serine/arginine-rich splicing factor 8         | Multiple_Complex |
| TC1700011465.hg.1    | 7.64  | 8.8   | -2.24  | 2.85E-07 | 2.98E-06 | LRRC37A3   | leucine rich repeat containing 37, member A3   | Multiple_Complex |
| TC2000008001.hg.1    | 6.83  | 7.97  | -2.21  | 2.86E-07 | 2.99E-06 | ADRM1      | adhesion regulating molecule 1                 | Multiple_Complex |
| TC0500013261.hg.1    | 7.42  | 8.41  | -1.98  | 2.86E-07 | 2.99E-06 | GALNT10    | polypeptide N-acetylgalactosaminyltransferas   | Multiple_Complex |
| TC2100008496.hg.1    | 6.16  | 7.99  | -3.55  | 2.87E-07 | 2.99E-06 | SLC5A3; M  | solute carrier family 5 (sodium/myo-inositol c | Multiple_Complex |
| TC0X00009387.hg.1    | 9.46  | 7.47  | 3.97   | 2.88E-07 | 3.01E-06 | RPGR       | retinitis pigmentosa GTPase regulator          | Multiple_Complex |
| TC1600009942.hg.1    | 10.4  | 11.93 | -2.88  | 2.89E-07 | 3.01E-06 | CDIPT      | CDP-diacylglycerol--inositol 3-phosphatidyltra | Multiple_Complex |
| TC0X00009896.hg.1    | 4.91  | 5.89  | -1.98  | 2.90E-07 | 3.03E-06 | LAS1L      | LAS1-like, ribosome biogenesis factor          | Multiple_Complex |
| TC1800007071.hg.1    | 7.3   | 8.13  | -1.79  | 2.90E-07 | 3.03E-06 | ZNF397     | zinc finger protein 397                        | Multiple_Complex |
| TC0100008517.hg.1    | 4.8   | 6.61  | -3.51  | 2.98E-07 | 3.10E-06 | NFIA       | nuclear factor I/A                             | Multiple_Complex |
| TC0600014240.hg.1    | 6.61  | 5.29  | 2.5    | 2.99E-07 | 3.11E-06 | LOC10013C  | uncharacterized LOC100130357; novel transcr    | Multiple_Complex |
| TC0100012315.hg.1    | 9.58  | 8.24  | 2.52   | 3.01E-07 | 3.13E-06 | NLRP3      | NLR family, pyrin domain containing 3          | Multiple_Complex |
| TC0M00006434.hg.1    | 14.58 | 12.36 | 4.64   | 3.04E-07 | 3.16E-06 | ND2        | MTND2                                          | Multiple_Complex |
| TC2000010015.hg.1    | 4.78  | 4.03  | 1.69   | 3.04E-07 | 3.16E-06 | WFDC6      | WAP four-disulfide core domain 6               | Coding           |
| TC1900011719.hg.1    | 5.7   | 6.8   | -2.14  | 3.06E-07 | 3.18E-06 | ZNF420     | zinc finger protein 420                        | Multiple_Complex |
| TC0200016680.hg.1    | 4.73  | 5.73  | -2     | 3.07E-07 | 3.18E-06 | SERTAD2    | SERTA domain containing 2                      | NonCoding        |
| TC1600010651.hg.1    | 8.05  | 9.8   | -3.36  | 3.08E-07 | 3.19E-06 | RANBP10    | RAN binding protein 10                         | Multiple_Complex |
| TC0100007940.hg.1    | 16.82 | 14.97 | 3.59   | 3.09E-07 | 3.20E-06 | CAP1       | CAP, adenylate cyclase-associated protein 1 (y | Multiple_Complex |
| TC2000007923.hg.1    | 6.61  | 7.76  | -2.22  | 3.13E-07 | 3.25E-06 | NELFCD     | negative elongation factor complex member C    | Multiple_Complex |
| TC1700007057.hg.1    | 7.51  | 6.48  | 2.04   | 3.14E-07 | 3.26E-06 | NT5M       | 5,3-nucleotidase, mitochondrial                | Multiple_Complex |
| TC2000008055.hg.1    | 8.56  | 9.46  | -1.87  | 3.14E-07 | 3.26E-06 | ARFGAP1;   | ADP-ribosylation factor GTPase activating pro  | Multiple_Complex |
| TC1000006924.hg.1    | 11.53 | 9.65  | 3.67   | 3.15E-07 | 3.26E-06 | ARL5B      | ADP-ribosylation factor like GTPase 5B         | Multiple_Complex |
| TC0300013970.hg.1    | 8.35  | 6.59  | 3.4    | 3.17E-07 | 3.27E-06 | PFKFB4; M  | 6-phosphofructo-2-kinase/fructose-2,6-bipho    | Multiple_Complex |
| TC0900009268.hg.1    | 6.75  | 7.55  | -1.73  | 3.18E-07 | 3.29E-06 | NDOR1      | NADPH dependent diflavin oxidoreductase 1      | Multiple_Complex |
| TC0600010305.hg.1    | 6.3   | 7.38  | -2.13  | 3.19E-07 | 3.30E-06 | C6orf120   | chromosome 6 open reading frame 120            | Coding           |
| TC0200008900.hg.1    | 7.89  | 9.13  | -2.37  | 3.20E-07 | 3.31E-06 | TMEM87B    | transmembrane protein 87B                      | Multiple_Complex |
| TC0100017534.hg.1    | 7.87  | 8.99  | -2.17  | 3.27E-07 | 3.38E-06 | ITPKB      | inositol-trisphosphate 3-kinase B              | Multiple_Complex |
| TC0600014220.hg.1    | 10.33 | 11.63 | -2.47  | 3.28E-07 | 3.38E-06 | SERPINB9   | serpin peptidase inhibitor, clade B (ovalbumin | Multiple_Complex |
| TC0300010680.hg.1    | 4.73  | 6.2   | -2.77  | 3.28E-07 | 3.38E-06 | CLASP2     | Transcript Identified by AceView, Entrez Gene  | Unassigned       |
| TC0400007786.hg.1    | 5.23  | 6.47  | -2.35  | 3.31E-07 | 3.41E-06 | UTP3       | UTP3, small subunit (SSU) processome compo     | Coding           |
| TC0X00008760.hg.1    | 8.9   | 7.12  | 3.44   | 3.34E-07 | 3.44E-06 | ZNF185     | zinc finger protein 185 (LIM domain)           | Multiple_Complex |
| TC0300014081.hg.1    | 7.27  | 8.58  | -2.49  | 3.35E-07 | 3.45E-06 | TMEM41A    | transmembrane protein 41A                      | Multiple_Complex |
| TC1600007007.hg.1    | 9.32  | 8.05  | 2.4    | 3.35E-07 | 3.45E-06 | PDXDC1     | pyridoxal-dependent decarboxylase domain c     | Multiple_Complex |
| TC0600010757.hg.1    | 5.09  | 6.67  | -2.99  | 3.37E-07 | 3.47E-06 | SLC35B3    | solute carrier family 35 (adenosine 3-phospho  | Multiple_Complex |
| TC0500008785.hg.1    | 10.42 | 5.55  | 29.3   | 3.41E-07 | 3.51E-06 | EGR1       | early growth response 1                        | Coding           |
| TC0400009110.hg.1    | 5.37  | 4.48  | 1.85   | 3.42E-07 | 3.52E-06 | GRIA2      | glutamate receptor, ionotropic, AMPA 2         | Multiple_Complex |
| TSUnmapped00000336.h | 9.53  | 10.84 | -2.48  | 3.45E-07 | 3.55E-06 | RCC2       | regulator of chromosome condensation 2         | Coding           |
| TC0700009394.hg.1    | 7.09  | 8.2   | -2.16  | 3.46E-07 | 3.55E-06 | AGK        | acylglycerol kinase                            | Multiple_Complex |
| TC0900011284.hg.1    | 8.57  | 9.97  | -2.65  | 3.47E-07 | 3.56E-06 | AKNA       | AT-hook transcription factor                   | Multiple_Complex |
| TC0200012977.hg.1    | 10.58 | 7.97  | 6.09   | 3.47E-07 | 3.56E-06 | MXD1       | Memczak2013 ANTISENSE, coding, INTERNAL,       | NonCoding        |
| TC1900010943.hg.1    | 7.16  | 6.16  | 2.01   | 3.49E-07 | 3.58E-06 | RTN2       | reticulon 2                                    | Multiple_Complex |
| TC1800007734.hg.1    | 7.61  | 8.87  | -2.4   | 3.54E-07 | 3.63E-06 | ZNF236     | zinc finger protein 236                        | Multiple_Complex |
| TC0X00011401.hg.1    | 11.09 | 12.28 | -2.28  | 3.58E-07 | 3.66E-06 | RBMX; SNC  | RNA binding motif protein, X-linked; small nuc | Multiple_Complex |
| TC1100012165.hg.1    | 13.94 | 12.05 | 3.71   | 3.63E-07 | 3.72E-06 | CASP4      | caspase 4                                      | Multiple_Complex |

|                      |       |       |       |          |          |            |                                                   |                  |
|----------------------|-------|-------|-------|----------|----------|------------|---------------------------------------------------|------------------|
| TC1900007819.hg.1    | 6.48  | 7.9   | -2.69 | 3.64E-07 | 3.73E-06 | ZNF302     | zinc finger protein 302                           | Multiple_Complex |
| TC1700007985.hg.1    | 8.58  | 7.73  | 1.8   | 3.65E-07 | 3.73E-06 | TMUB2      | transmembrane and ubiquitin-like domain cor       | Multiple_Complex |
| TC0100010152.hg.1    | 8.34  | 7.04  | 2.47  | 3.68E-07 | 3.76E-06 | LMNA       | lamin A/C                                         | Multiple_Complex |
| TC1200010336.hg.1    | 5.56  | 6.74  | -2.26 | 3.69E-07 | 3.77E-06 | YARS2      | tyrosyl-tRNA synthetase 2, mitochondrial          | Multiple_Complex |
| TC0200010975.hg.1    | 12.86 | 11.63 | 2.34  | 3.69E-07 | 3.77E-06 | AGFG1; MIR | ArfGAP with FG repeats 1; microRNA 5703           | Multiple_Complex |
| TC0200013894.hg.1    | 6.4   | 7.87  | -2.77 | 3.70E-07 | 3.77E-06 | ANAPC1     | anaphase promoting complex subunit 1              | Multiple_Complex |
| TC2000010009.hg.1    | 5.61  | 6.65  | -2.05 | 3.70E-07 | 3.77E-06 | BLCAP      | bladder cancer associated protein                 | NonCoding        |
| TC0700010046.hg.1    | 5.16  | 6.04  | -1.83 | 3.72E-07 | 3.79E-06 | FTSJ2      | FtsJ RNA methyltransferase homolog 2 (E. coli     | Multiple_Complex |
| TC0500008304.hg.1    | 9.2   | 10.4  | -2.29 | 3.73E-07 | 3.81E-06 | SLC25A46   | solute carrier family 25, member 46               | Multiple_Complex |
| TC1500007084.hg.1    | 11.1  | 9.93  | 2.25  | 3.77E-07 | 3.84E-06 | CASC4      | cancer susceptibility candidate 4                 | Multiple_Complex |
| TC0600008989.hg.1    | 6.03  | 7.01  | -1.98 | 3.78E-07 | 3.85E-06 | QRSL1      | glutamyl-tRNA synthase (glutamine-hydroly         | Multiple_Complex |
| TC2000009887.hg.1    | 5.15  | 6.73  | -2.98 | 3.78E-07 | 3.85E-06 | PLCB1      | phospholipase C, beta 1 (phosphoinositide-sp      | Multiple_Complex |
| TC1700010204.hg.1    | 8.44  | 7.37  | 2.1   | 3.79E-07 | 3.86E-06 | SDF2       | stromal cell-derived factor 2                     | Multiple_Complex |
| TC1900007419.hg.1    | 4.44  | 5.42  | -1.97 | 3.79E-07 | 3.86E-06 | SLC25A42   | solute carrier family 25, member 42               | Multiple_Complex |
| TC1100007763.hg.1    | 8.23  | 6.13  | 4.28  | 3.80E-07 | 3.86E-06 | MS4A3      | membrane-spanning 4-domains, subfamily A,         | Multiple_Complex |
| TC0400009765.hg.1    | 8.11  | 9.48  | -2.59 | 3.82E-07 | 3.89E-06 | MXD4; MIR  | MAX dimerization protein 4; microRNA 4800         | Multiple_Complex |
| TC1900006532.hg.1    | 13.45 | 16.09 | -6.23 | 3.91E-07 | 3.98E-06 | RPS15      | ribosomal protein S15                             | Multiple_Complex |
| TC1200010793.hg.1    | 8.45  | 7.15  | 2.46  | 3.94E-07 | 4.00E-06 | CSAD       | cysteine sulfinic acid decarboxylase              | Multiple_Complex |
| TC0600009819.hg.1    | 6.43  | 5.54  | 1.84  | 3.97E-07 | 4.03E-06 | ULBP2      | UL16 binding protein 2                            | Coding           |
| TC0M00006442.hg.1    | 18.97 | 19.67 | -1.62 | 4.05E-07 | 4.11E-06 | ND5        | NADH dehydrogenase, subunit 5 (complex I)         | Multiple_Complex |
| TC0500011497.hg.1    | 11.49 | 9.49  | 4.02  | 4.06E-07 | 4.11E-06 | GLRX       | glutaredoxin                                      | Multiple_Complex |
| TC1200009164.hg.1    | 7.85  | 8.76  | -1.88 | 4.08E-07 | 4.14E-06 | RNF34      | ring finger protein 34, E3 ubiquitin protein lig  | Multiple_Complex |
| TC1000008056.hg.1    | 13.11 | 10.98 | 4.37  | 4.11E-07 | 4.17E-06 | VCL        | vinculin                                          | Multiple_Complex |
| TC2200008183.hg.1    | 5.65  | 7.79  | -4.41 | 4.14E-07 | 4.19E-06 | VPREB3     | pre-B lymphocyte 3                                | Coding           |
| TC0600011375.hg.1    | 6.33  | 7.35  | -2.03 | 4.15E-07 | 4.20E-06 | DHX16      | DEAH (Asp-Glu-Ala-His) box polypeptide 16         | Multiple_Complex |
| TC0500007925.hg.1    | 7.58  | 8.55  | -1.96 | 4.19E-07 | 4.24E-06 | RASGRF2    | Ras protein-specific guanine nucleotide-releas    | Multiple_Complex |
| TC0100010379.hg.1    | 10.6  | 11.58 | -1.97 | 4.19E-07 | 4.24E-06 | UHMK1      | U2AF homology motif (UHM) kinase 1                | Multiple_Complex |
| TC2000009392.hg.1    | 12.71 | 10.33 | 5.19  | 4.20E-07 | 4.25E-06 | B4GALT5    | UDP-Gal:betaGlcNAc beta 1,4- galactosyltrans      | Multiple_Complex |
| TC1500010866.hg.1    | 10.61 | 9.29  | 2.51  | 4.23E-07 | 4.28E-06 | RAB27A     | RAB27A, member RAS oncogene family                | Multiple_Complex |
| TC1600006685.hg.1    | 6.06  | 7.27  | -2.31 | 4.26E-07 | 4.30E-06 | ZNF75A     | zinc finger protein 75a                           | Multiple_Complex |
| TC1600009954.hg.1    | 13.29 | 11.75 | 2.91  | 4.31E-07 | 4.35E-06 | MAPK3      | mitogen-activated protein kinase 3                | Multiple_Complex |
| TC0600008348.hg.1    | 9.38  | 10.43 | -2.08 | 4.32E-07 | 4.36E-06 | ZNF451     | zinc finger protein 451                           | Multiple_Complex |
| TC0200013567.hg.1    | 9.69  | 11.08 | -2.64 | 4.33E-07 | 4.37E-06 | ANKRD36B   | ankyrin repeat domain 36B                         | Multiple_Complex |
| TC1900006890.hg.1    | 12.76 | 14.86 | -4.28 | 4.33E-07 | 4.37E-06 | RPS28      | ribosomal protein S28                             | Multiple_Complex |
| TC1100006658.hg.1    | 5.23  | 6.98  | -3.35 | 4.35E-07 | 4.38E-06 | OR52K1     | olfactory receptor, family 52, subfamily K, me    | Coding           |
| TC1200012206.hg.1    | 7.76  | 8.7   | -1.92 | 4.38E-07 | 4.41E-06 | KDM2B      | lysine (K)-specific demethylase 2B                | Multiple_Complex |
| TC0800011239.hg.1    | 8.58  | 6.69  | 3.72  | 4.38E-07 | 4.41E-06 | COX6C      | cytochrome c oxidase subunit VIc                  | Multiple_Complex |
| TC1800008750.hg.1    | 8.1   | 10.07 | -3.91 | 4.40E-07 | 4.43E-06 | TCF4       | transcription factor 4                            | Multiple_Complex |
| TC1500009204.hg.1    | 10.89 | 11.99 | -2.14 | 4.40E-07 | 4.43E-06 | UBR1       | ubiquitin protein ligase E3 component n-recog     | Multiple_Complex |
| TC0100009364.hg.1    | 10.2  | 8.42  | 3.44  | 4.48E-07 | 4.50E-06 | CSF1       | colony stimulating factor 1 (macrophage)          | Multiple_Complex |
| TC1300008113.hg.1    | 8.17  | 9.21  | -2.05 | 4.49E-07 | 4.51E-06 | CUL4A      | cullin 4A                                         | Multiple_Complex |
| TC1600010476.hg.1    | 8.91  | 9.92  | -2.01 | 4.53E-07 | 4.54E-06 | CSNK2A2    | casein kinase 2, alpha prime polypeptide          | Multiple_Complex |
| TC1700011313.hg.1    | 10.71 | 9.23  | 2.8   | 4.53E-07 | 4.54E-06 | USP32      | ubiquitin specific peptidase 32                   | Multiple_Complex |
| TC1800007895.hg.1    | 8.05  | 9.27  | -2.33 | 4.59E-07 | 4.60E-06 | METTL4     | methyltransferase like 4                          | Multiple_Complex |
| TC2200006894.hg.1    | 5.22  | 3.75  | 2.77  | 4.61E-07 | 4.62E-06 | UPB1       | ureidopropionase, beta                            | Multiple_Complex |
| TC1600007143.hg.1    | 9.16  | 8.06  | 2.14  | 4.61E-07 | 4.62E-06 | LYRM1      | LYR motif containing 1                            | Multiple_Complex |
| TC0100014937.hg.1    | 5.58  | 6.62  | -2.06 | 4.62E-07 | 4.62E-06 | FAM69A     | family with sequence similarity 69, member A      | Coding           |
| TC1700007606.hg.1    | 6.6   | 7.9   | -2.46 | 4.62E-07 | 4.62E-06 | TAF15      | Transcript Identified by AceView, Entrez Gene     | Unassigned       |
| TC1400009829.hg.1    | 6.47  | 7.65  | -2.27 | 4.66E-07 | 4.66E-06 | CEP128     | centrosomal protein 128kDa                        | Multiple_Complex |
| TC1500010747.hg.1    | 8.5   | 9.66  | -2.23 | 4.66E-07 | 4.66E-06 | RNF111     | ring finger protein 111                           | Multiple_Complex |
| TC1800009285.hg.1    | 14.2  | 9.96  | 18.92 | 4.70E-07 | 4.70E-06 | RPL17; SNC | ribosomal protein L17; small nucleolar RNA, C     | Multiple_Complex |
| TC0300009855.hg.1    | 10.52 | 8.65  | 3.64  | 4.71E-07 | 4.71E-06 | IL1RAP     | interleukin 1 receptor accessory protein          | Multiple_Complex |
| TC0200007825.hg.1    | 8.17  | 9.18  | -2.01 | 4.72E-07 | 4.72E-06 | CEP68      | centrosomal protein 68kDa                         | Multiple_Complex |
| TC1200007759.hg.1    | 8.82  | 10.07 | -2.38 | 4.73E-07 | 4.73E-06 | COPZ1      | coatamer protein complex subunit zeta 1           | Multiple_Complex |
| TC0Y00006730.hg.1    | 10.58 | 6.6   | 15.71 | 4.79E-07 | 4.78E-06 | EIF1AY     | eukaryotic translation initiation factor 1A, Y-li | Multiple_Complex |
| TC0700006890.hg.1    | 5.75  | 4.38  | 2.58  | 4.84E-07 | 4.83E-06 | IL6        | interleukin 6                                     | Multiple_Complex |
| TC1100012613.hg.1    | 12.91 | 14.98 | -4.17 | 4.85E-07 | 4.83E-06 | HSPA8; SNC | heat shock 70kDa protein 8; small nucleolar R     | Multiple_Complex |
| TC0800008266.hg.1    | 7.17  | 8.43  | -2.39 | 4.85E-07 | 4.83E-06 | DPY19L4    | dpy-19-like 4 (C. elegans)                        | Multiple_Complex |
| TC1600011342.hg.1    | 10.78 | 12.19 | -2.67 | 4.87E-07 | 4.85E-06 | NAA60      | N(alpha)-acetyltransferase 60, NatF catalytic s   | Multiple_Complex |
| TC0800009853.hg.1    | 9.63  | 8.56  | 2.11  | 4.87E-07 | 4.85E-06 | BIN3       | bridging integrator 3                             | Multiple_Complex |
| TC1500008105.hg.1    | 9.06  | 8.12  | 1.92  | 4.88E-07 | 4.85E-06 | FAM103A1   | family with sequence similarity 103, member       | Coding           |
| TC0100012828.hg.1    | 7.85  | 7.01  | 1.78  | 4.88E-07 | 4.86E-06 | LZIC       | leucine zipper and CTNNBIP1 domain containi       | Multiple_Complex |
| TC1400007554.hg.1    | 6.49  | 7.73  | -2.37 | 4.90E-07 | 4.87E-06 | SLC39A9    | solute carrier family 39, member 9                | Multiple_Complex |
| TC0500011316.hg.1    | 14.89 | 11.62 | 9.64  | 4.90E-07 | 4.87E-06 | RPS23      | ribosomal protein S23                             | Multiple_Complex |
| TC1700008895.hg.1    | 6.26  | 7.2   | -1.92 | 5.01E-07 | 4.97E-06 | NUP85      | nucleoporin 85kDa                                 | Multiple_Complex |
| TC1700012423.hg.1    | 6.58  | 7.69  | -2.17 | 5.02E-07 | 4.98E-06 | LRR37A4F   | leucine rich repeat containing 37, member A4      | Multiple_Complex |
| TSUnmapped00000342.h | 7.66  | 8.39  | -1.66 | 5.03E-07 | 4.99E-06 | TCF20      | transcription factor 20 (AR1)                     | Coding           |
| TSUnmapped00000362.h | 7.66  | 8.39  | -1.66 | 5.03E-07 | 4.99E-06 | TCF20      | transcription factor 20 (AR1)                     | Coding           |
| TC1100013014.hg.1    | 7.47  | 9.11  | -3.13 | 5.06E-07 | 5.02E-06 | MS4A7      | membrane-spanning 4-domains, subfamily A,         | Multiple_Complex |
| TC1000011964.hg.1    | 9.39  | 8.47  | 1.9   | 5.07E-07 | 5.02E-06 | RAB11FIP2  | RAB11 family interacting protein 2 (class I)      | Multiple_Complex |

|                   |       |       |       |          |          |             |                                                         |                  |
|-------------------|-------|-------|-------|----------|----------|-------------|---------------------------------------------------------|------------------|
| TC0800008547.hg.1 | 5.23  | 3.85  | 2.6   | 5.15E-07 | 5.10E-06 | PKHD1L1     | polycystic kidney and hepatic disease 1 (autos          | Multiple_Complex |
| TC0700009977.hg.1 | 5.16  | 3.98  | 2.28  | 5.17E-07 | 5.12E-06 | PDGFA       | platelet-derived growth factor alpha polypept           | Multiple_Complex |
| TC1200006935.hg.1 | 10.95 | 12.73 | -3.45 | 5.19E-07 | 5.13E-06 | ATF7IP      | activating transcription factor 7 interacting pr        | Multiple_Complex |
| TC1200010023.hg.1 | 8.35  | 9.71  | -2.56 | 5.20E-07 | 5.14E-06 | ERP27       | endoplasmic reticulum protein 27                        | Multiple_Complex |
| TC0100011417.hg.1 | 13.08 | 10.82 | 4.8   | 5.22E-07 | 5.16E-06 | CR1L        | complement component (3b/4b) receptor 1-li              | Multiple_Complex |
| TC0100007105.hg.1 | 10.16 | 7.92  | 4.73  | 5.26E-07 | 5.20E-06 | PADI4       | peptidyl arginine deiminase, type IV                    | Multiple_Complex |
| TC1000009802.hg.1 | 9.01  | 7.99  | 2.04  | 5.28E-07 | 5.22E-06 | UPF2        | UPF2 regulator of nonsense transcripts homol            | Multiple_Complex |
| TC1200012240.hg.1 | 11.91 | 10.6  | 2.48  | 5.30E-07 | 5.23E-06 | RSRC2       | arginine/serine-rich coiled-coil 2                      | Multiple_Complex |
| TC1400010774.hg.1 | 9.06  | 10.37 | -2.48 | 5.32E-07 | 5.25E-06 | FOXN3       | forkhead box N3                                         | Multiple_Complex |
| TC0600014142.hg.1 | 14.71 | 12.81 | 3.75  | 5.33E-07 | 5.25E-06 | PTP4A1      | protein tyrosine phosphatase type IVA, memb             | Multiple_Complex |
| TC0X00011399.hg.1 | 5.91  | 6.98  | -2.1  | 5.35E-07 | 5.27E-06 | FAM127B     | family with sequence similarity 127, member             | Multiple_Complex |
| TC0200011362.hg.1 | 8.43  | 10.2  | -3.41 | 5.43E-07 | 5.35E-06 | RNPEPL1     | arginyl aminopeptidase (aminopeptidase B)-li            | Multiple_Complex |
| TC0500013387.hg.1 | 10.11 | 7.98  | 4.38  | 5.50E-07 | 5.42E-06 | RPS14       | ribosomal protein S14                                   | Multiple_Complex |
| TC0X00010506.hg.1 | 6.18  | 7.14  | -1.95 | 5.50E-07 | 5.42E-06 | AMMECR1     | Alport syndrome, mental retardation, midface            | Multiple_Complex |
| TC1200007959.hg.1 | 9.28  | 10.32 | -2.06 | 5.51E-07 | 5.42E-06 | MON2        | MON2 homolog, regulator of endosome-to-G                | Multiple_Complex |
| TC1300008533.hg.1 | 7.76  | 9.22  | -2.74 | 5.56E-07 | 5.47E-06 | HSPH1       | heat shock 105kDa/110kDa protein 1                      | Multiple_Complex |
| TC0100015786.hg.1 | 10.13 | 11.48 | -2.55 | 5.56E-07 | 5.47E-06 | POGZ        | pogo transposable element with ZNF domain               | Multiple_Complex |
| TC0400008170.hg.1 | 5.78  | 7.33  | -2.93 | 5.65E-07 | 5.55E-06 | SMARCAD1    | SWI/SNF-related, matrix-associated actin-dep            | Multiple_Complex |
| TC1600010334.hg.1 | 8.56  | 6.65  | 3.74  | 5.65E-07 | 5.55E-06 | LOC643802   | u3 small nucleolar ribonucleoprotein protein            | Multiple_Complex |
| TC0200012318.hg.1 | 5.31  | 4.41  | 1.87  | 5.71E-07 | 5.60E-06 | CDK14       | cyclin-dependent kinase-like 4                          | Multiple_Complex |
| TC0700010182.hg.1 | 7.75  | 8.97  | -2.34 | 5.72E-07 | 5.61E-06 | PMS2        | PMS1 homolog 2, mismatch repair system cor              | Multiple_Complex |
| TC1500010881.hg.1 | 7.55  | 6.56  | 1.98  | 5.72E-07 | 5.61E-06 | TIPIN; RPL9 | TIMELESS interacting protein; ribosomal prote           | Multiple_Complex |
| TC1100011930.hg.1 | 7.58  | 9.56  | -3.93 | 5.72E-07 | 5.61E-06 | CHORDC1     | cysteine and histidine rich domain containi             | Multiple_Complex |
| TC1400006519.hg.1 | 7.85  | 9.03  | -2.26 | 5.74E-07 | 5.62E-06 | APEX1       | APEX nuclease (multifunctional DNA repair en            | Multiple_Complex |
| TC0800012422.hg.1 | 11.14 | 9.81  | 2.5   | 5.81E-07 | 5.70E-06 | VCPIP1      | valosin containing protein (p97)/p47 complex            | Multiple_Complex |
| TC1900008326.hg.1 | 6.83  | 5.05  | 3.44  | 5.95E-07 | 5.82E-06 | FOSB        | FBJ murine osteosarcoma viral oncogene hom              | Multiple_Complex |
| TC1700006525.hg.1 | 7.72  | 8.91  | -2.28 | 5.95E-07 | 5.83E-06 | RPA1        | replication protein A1                                  | Multiple_Complex |
| TC0200016668.hg.1 | 5.28  | 6.17  | -1.85 | 5.97E-07 | 5.85E-06 | GPR75       | G protein-coupled receptor 75                           | Coding           |
| TC0200016702.hg.1 | 5.2   | 6.2   | -2    | 6.00E-07 | 5.87E-06 | POLR1A      | polymerase (RNA) I polypeptide A                        | Multiple_Complex |
| TC1600010341.hg.1 | 9.77  | 8.48  | 2.44  | 6.05E-07 | 5.91E-06 | AKTIP       | AKT interacting protein                                 | Multiple_Complex |
| TC1200010119.hg.1 | 8.48  | 9.67  | -2.28 | 6.08E-07 | 5.94E-06 | C2CD5       | C2 calcium-dependent domain containing 5                | Multiple_Complex |
| TC0900010352.hg.1 | 8.78  | 9.8   | -2.03 | 6.11E-07 | 5.97E-06 | PTAR1       | protein prenyltransferase alpha subunit repea           | Multiple_Complex |
| TC0300012498.hg.1 | 8.94  | 7.43  | 2.85  | 6.16E-07 | 6.01E-06 | ANAPC13     | anaphase promoting complex subunit 13                   | Multiple_Complex |
| TC0600009961.hg.1 | 6.09  | 7.34  | -2.39 | 6.16E-07 | 6.01E-06 | ARID1B      | AT rich interactive domain 1B (SWI1-like)               | Multiple_Complex |
| TC1300007861.hg.1 | 5.39  | 6.54  | -2.23 | 6.32E-07 | 6.16E-06 | PCCA        | propionyl-CoA carboxylase alpha subunit                 | Multiple_Complex |
| TC1500010256.hg.1 | 10.04 | 11.29 | -2.38 | 6.33E-07 | 6.17E-06 | BTBD1       | BTB (POZ) domain containing 1                           | Multiple_Complex |
| TC0200015216.hg.1 | 8.07  | 9.55  | -2.78 | 6.37E-07 | 6.21E-06 | ORMDL1      | ORMDL sphingolipid biosynthesis regulator 1             | Multiple_Complex |
| TC0X00011180.hg.1 | 6.09  | 5.28  | 1.75  | 6.41E-07 | 6.24E-06 | RENBP       | renin binding protein                                   | Multiple_Complex |
| TC0300009799.hg.1 | 4.9   | 8.08  | -9.04 | 6.46E-07 | 6.29E-06 | RTP4        | receptor (chemosensory) transporter protein             | Coding           |
| TC1900010967.hg.1 | 9.2   | 6.71  | 5.65  | 6.52E-07 | 6.35E-06 | PGLYRP1     | peptidoglycan recognition protein 1                     | Coding           |
| TC1900007405.hg.1 | 6.36  | 7.1   | -1.68 | 6.53E-07 | 6.35E-06 | CRTC1       | CREB regulated transcription coactivator 1              | Multiple_Complex |
| TC0400006706.hg.1 | 11.79 | 10.05 | 3.34  | 6.55E-07 | 6.37E-06 | TBC1D14     | TBC1 domain family, member 14                           | Multiple_Complex |
| TC2000006852.hg.1 | 6.12  | 4.88  | 2.36  | 6.56E-07 | 6.38E-06 | SLC24A3     | solute carrier family 24 (sodium/potassium/c            | Coding           |
| TC1600008580.hg.1 | 4.76  | 5.83  | -2.1  | 6.61E-07 | 6.42E-06 | GAN; MIR4   | gigaxonin; microRNA 4720                                | Multiple_Complex |
| TC1400008929.hg.1 | 7.68  | 6.8   | 1.84  | 6.62E-07 | 6.43E-06 | PPP2R3C     | protein phosphatase 2, regulatory subunit B, $\epsilon$ | Multiple_Complex |
| TC1400010616.hg.1 | 6.69  | 7.89  | -2.3  | 6.62E-07 | 6.43E-06 | SLC38A6     | solute carrier family 38, member 6                      | Multiple_Complex |
| TC0600006793.hg.1 | 6.49  | 7.48  | -2    | 6.63E-07 | 6.43E-06 | CDYL        | chromodomain protein, Y-like                            | Multiple_Complex |
| TC1400010630.hg.1 | 8.24  | 9.28  | -2.05 | 6.63E-07 | 6.43E-06 | TTL5        | tubulin tyrosine ligase-like family member 5            | Multiple_Complex |
| TC1400008333.hg.1 | 13.19 | 14.47 | -2.43 | 6.64E-07 | 6.44E-06 | PPP2R5C     | protein phosphatase 2, regulatory subunit B, $\epsilon$ | Multiple_Complex |
| TC0100007666.hg.1 | 7.26  | 5.59  | 3.18  | 6.65E-07 | 6.44E-06 | KPNA6       | Jeck2013 ALT_ACCEPTOR, ALT_DONOR, codin                 | NonCoding        |
| TC0600008253.hg.1 | 6.32  | 7.44  | -2.16 | 6.66E-07 | 6.45E-06 | PAQR8       | progesterin and adipoQ receptor family membe            | Coding           |
| TC0200012959.hg.1 | 7.82  | 6.52  | 2.47  | 6.74E-07 | 6.52E-06 | NFU1        | NFU1 iron-sulfur cluster scaffold                       | Multiple_Complex |
| TC0700010585.hg.1 | 8.59  | 10.15 | -2.96 | 6.74E-07 | 6.52E-06 | JAZF1       | JAZF zinc finger 1                                      | Multiple_Complex |
| TC0700010509.hg.1 | 9.48  | 8.11  | 2.58  | 6.76E-07 | 6.53E-06 | CYCS        | cytochrome c, somatic                                   | Coding           |
| TC0800009511.hg.1 | 3.62  | 4.99  | -2.58 | 6.78E-07 | 6.55E-06 | SGK223      | homolog of rat pragma of Rnd2; Tyrosine-pro             | Coding           |
| TC1400007558.hg.1 | 11.08 | 9.61  | 2.76  | 6.80E-07 | 6.57E-06 | SUSD6       | sushi domain containing 6                               | Multiple_Complex |
| TC1400010629.hg.1 | 8.38  | 6.21  | 4.5   | 6.82E-07 | 6.58E-06 | FLVCR2      | feline leukemia virus subgroup C cellular rece          | Multiple_Complex |
| TC0900009106.hg.1 | 6.55  | 7.52  | -1.96 | 6.82E-07 | 6.58E-06 | WDR5        | WD repeat domain 5                                      | Multiple_Complex |
| TC1100013081.hg.1 | 7.01  | 5.9   | 2.17  | 6.84E-07 | 6.60E-06 | FUT4        | fucosyltransferase 4 (alpha (1,3) fucosyltransf         | Coding           |
| TC0300010714.hg.1 | 10.34 | 11.49 | -2.22 | 6.85E-07 | 6.61E-06 | TRANK1      | tetratricopeptide repeat and ankyrin repeat c           | Multiple_Complex |
| TC0200007363.hg.1 | 5.4   | 6.5   | -2.14 | 6.86E-07 | 6.62E-06 | MTA3        | metastasis associated 1 family member 3                 | Multiple_Complex |
| TC2000007859.hg.1 | 10.29 | 13.03 | -6.65 | 6.87E-07 | 6.62E-06 | RBM38       | RNA binding motif protein 38                            | Multiple_Complex |
| TC0100010140.hg.1 | 8.87  | 10.16 | -2.44 | 6.92E-07 | 6.67E-06 | SYT11       | synaptotagmin XI                                        | Coding           |
| TC0900009829.hg.1 | 7.4   | 6.27  | 2.2   | 6.93E-07 | 6.67E-06 | NDUFB6      | NADH dehydrogenase (ubiquinone) 1 beta sul              | Coding           |
| TC1000012483.hg.1 | 6.24  | 5.19  | 2.07  | 6.97E-07 | 6.71E-06 | C10orf131   | chromosome 10 open reading frame 131                    | Coding           |
| TC0700011562.hg.1 | 9.31  | 8.17  | 2.21  | 6.98E-07 | 6.71E-06 | TMEM120A    | transmembrane protein 120A                              | Multiple_Complex |
| TC0300006622.hg.1 | 4.74  | 3.8   | 1.93  | 7.08E-07 | 6.81E-06 | PPARG       | peroxisome proliferator-activated receptor ga           | Multiple_Complex |
| TC0900008483.hg.1 | 7.88  | 9.46  | -3.01 | 7.11E-07 | 6.83E-06 | SLC31A1     | solute carrier family 31 (copper transporter), r        | Multiple_Complex |
| TC1200008028.hg.1 | 6.49  | 5.11  | 2.6   | 7.28E-07 | 7.00E-06 | MSRB3       | methionine sulfoxide reductase B3                       | Multiple_Complex |
| TC0100018390.hg.1 | 9.02  | 10.1  | -2.11 | 7.35E-07 | 7.05E-06 | SLC35E2     | solute carrier family 35, member E2                     | Multiple_Complex |

|                   |       |       |       |          |          |            |                                                                   |
|-------------------|-------|-------|-------|----------|----------|------------|-------------------------------------------------------------------|
| TC2100007797.hg.1 | 13.08 | 10.37 | 6.53  | 7.37E-07 | 7.07E-06 | ATP5J      | ATP synthase, H+ transporting, mitochondrial Multiple_Complex     |
| TC0500013301.hg.1 | 8.27  | 6.71  | 2.96  | 7.38E-07 | 7.08E-06 | DAB2       | Dab, mitogen-responsive phosphoprotein, ho Multiple_Complex       |
| TC1900010941.hg.1 | 6.2   | 7.26  | -2.09 | 7.42E-07 | 7.11E-06 | ERCC1      | excision repair cross-complementation group Multiple_Complex      |
| TC1200011573.hg.1 | 7.75  | 8.91  | -2.23 | 7.42E-07 | 7.11E-06 | NR2C1      | nuclear receptor subfamily 2, group C, memb Multiple_Complex      |
| TC2100006903.hg.1 | 8.44  | 7.14  | 2.46  | 7.44E-07 | 7.13E-06 | SOD1       | superoxide dismutase 1, soluble Multiple_Complex                  |
| TC2200007206.hg.1 | 6.41  | 7.6   | -2.27 | 7.47E-07 | 7.15E-06 | MCM5       | minichromosome maintenance complex com Multiple_Complex           |
| TC1500010908.hg.1 | 8.09  | 9.32  | -2.35 | 7.61E-07 | 7.28E-06 | STARD5     | StAR-related lipid transfer domain containi NonCoding             |
| TC2200008597.hg.1 | 6.17  | 5.18  | 1.99  | 7.62E-07 | 7.29E-06 | MYH9       | Zhang2013 ALT_ACCEPTOR, ALT_DONOR, cod NonCoding                  |
| TC0500008854.hg.1 | 11.3  | 10.6  | 1.63  | 7.63E-07 | 7.30E-06 | ANKHD1; E  | ankyrin repeat and KH domain containing 1; e Multiple_Complex     |
| TC0200007954.hg.1 | 6.94  | 8.34  | -2.64 | 7.65E-07 | 7.32E-06 | PCYOX1     | prenylcysteine oxidase 1 Multiple_Complex                         |
| TC0300010891.hg.1 | 5.71  | 6.77  | -2.1  | 7.67E-07 | 7.32E-06 | ZNF852     | zinc finger protein 852 Multiple_Complex                          |
| TC1000010499.hg.1 | 7.07  | 8.07  | -2    | 7.69E-07 | 7.34E-06 | ZFAND4     | zinc finger, AN1-type domain 4 Multiple_Complex                   |
| TC0900012176.hg.1 | 4.98  | 6.27  | -2.44 | 7.79E-07 | 7.43E-06 | URM1       | ubiquitin related modifier 1 Multiple_Complex                     |
| TC1000010438.hg.1 | 11.41 | 12.48 | -2.1  | 7.85E-07 | 7.49E-06 | HNRNPF     | heterogeneous nuclear ribonucleoprotein F Multiple_Complex        |
| TC0900011655.hg.1 | 7.79  | 9.86  | -4.19 | 7.86E-07 | 7.50E-06 | ZER1       | zyg-11 related, cell cycle regulator Multiple_Complex             |
| TC1100008409.hg.1 | 5.49  | 6.51  | -2.03 | 7.89E-07 | 7.52E-06 | PPME1      | protein phosphatase methylesterase 1 Multiple_Complex             |
| TC1700012442.hg.1 | 8.6   | 7.79  | 1.76  | 7.90E-07 | 7.53E-06 | TBC1D3P1-  | TBC1D3P1-DHX40P1 readthrough transcribed Multiple_Complex         |
| TC0100009195.hg.1 | 7.95  | 9.03  | -2.12 | 7.94E-07 | 7.56E-06 | SLC35A3    | solute carrier family 35 (UDP-N-acetylglucosai Multiple_Complex   |
| TC0M00006454.hg.1 | 17    | 14.77 | 4.68  | 7.98E-07 | 7.59E-06 | ND6        | NADH dehydrogenase, subunit 6 (complex I) Multiple_Complex        |
| TC0X00007132.hg.1 | 7.6   | 6.16  | 2.71  | 7.99E-07 | 7.60E-06 | CDK16      | cyclin-dependent kinase 16 Multiple_Complex                       |
| TC1600008003.hg.1 | 7.76  | 9.03  | -2.42 | 8.00E-07 | 7.60E-06 | ADGRG5     | adhesion G protein-coupled receptor G5 Multiple_Complex           |
| TC0600013727.hg.1 | 12.04 | 13.53 | -2.81 | 8.00E-07 | 7.60E-06 | EZR        | ezrin Multiple_Complex                                            |
| TC0600013341.hg.1 | 9.19  | 8.1   | 2.13  | 8.01E-07 | 7.61E-06 | GVQW2      | GVQW motif containing 2 Multiple_Complex                          |
| TC1800007198.hg.1 | 5.93  | 8.51  | -5.99 | 8.02E-07 | 7.62E-06 | SLC14A1    | solute carrier family 14 (urea transporter), me Multiple_Complex  |
| TC0100011267.hg.1 | 10.09 | 12.3  | -4.63 | 8.03E-07 | 7.63E-06 | ATP2B4     | ATPase, Ca++ transporting, plasma membrane Multiple_Complex       |
| TC1500009904.hg.1 | 13.14 | 11.33 | 3.49  | 8.06E-07 | 7.65E-06 | TLE3       | transducin-like enhancer of split 3 Multiple_Complex              |
| TC0400012945.hg.1 | 14.82 | 12.85 | 3.92  | 8.11E-07 | 7.69E-06 | HSD17B11   | hydroxysteroid (17-beta) dehydrogenase 11 Multiple_Complex        |
| TC0600007585.hg.1 | 8.69  | 10.06 | -2.59 | 8.15E-07 | 7.73E-06 | MICB       | MHC class I polypeptide-related sequence B Multiple_Complex       |
| TC0600011516.hg.1 | 4.09  | 5.38  | -2.45 | 8.26E-07 | 7.83E-06 | HLA-DOA    | major histocompatibility complex, class II, DO Multiple_Complex   |
| TC0400007840.hg.1 | 6.09  | 5.21  | 1.84  | 8.33E-07 | 7.89E-06 | CXCL1      | chemokine (C-X-C motif) ligand 1 (melanoma) Multiple_Complex      |
| TC0400012078.hg.1 | 5.72  | 7.37  | -3.14 | 8.33E-07 | 7.89E-06 | NR3C2      | nuclear receptor subfamily 3, group C, memb Multiple_Complex      |
| TC1200007595.hg.1 | 8.25  | 9.52  | -2.42 | 8.38E-07 | 7.93E-06 | SMARCD1    | SWI/SNF related, matrix associated, actin dep Multiple_Complex    |
| TC0200016452.hg.1 | 12.32 | 11.59 | 1.65  | 8.41E-07 | 7.95E-06 | REL        | v-rel avian reticuloendotheliosis viral oncogen Multiple_Complex  |
| TC1400007890.hg.1 | 10.8  | 12.05 | -2.37 | 8.43E-07 | 7.97E-06 | GPR65      | G protein-coupled receptor 65 Coding                              |
| TC1300009273.hg.1 | 9.34  | 6.24  | 8.59  | 8.46E-07 | 8.00E-06 | COMMD6     | COMM domain containing 6 Multiple_Complex                         |
| TC1100012812.hg.1 | 5.51  | 6.7   | -2.28 | 8.52E-07 | 8.05E-06 | PRDM10     | PR domain containing 10 Multiple_Complex                          |
| TC0600009144.hg.1 | 7.1   | 7.92  | -1.76 | 8.58E-07 | 8.10E-06 | KIAA1919   | KIAA1919 Multiple_Complex                                         |
| TC0300007485.hg.1 | 5.38  | 6.74  | -2.57 | 8.61E-07 | 8.13E-06 | SMIM4      | small integral membrane protein 4 Multiple_Complex                |
| TC1600009856.hg.1 | 9.85  | 10.91 | -2.09 | 8.64E-07 | 8.15E-06 | EIF3; EIF3 | eukaryotic translation initiation factor 3, subu Multiple_Complex |
| TC1500010407.hg.1 | 15.66 | 13.08 | 6.01  | 8.67E-07 | 8.18E-06 | ANPEP      | alanyl (membrane) aminopeptidase Multiple_Complex                 |
| TC1100009918.hg.1 | 8.9   | 10.51 | -3.05 | 8.68E-07 | 8.19E-06 | HBD        | hemoglobin, delta Coding                                          |
| TC0500007966.hg.1 | 7.98  | 6.07  | 3.77  | 8.69E-07 | 8.19E-06 | XRCC4      | X-ray repair complementing defective repair i Multiple_Complex    |
| TC0100009418.hg.1 | 13.29 | 12.17 | 2.17  | 8.74E-07 | 8.24E-06 | RAP1A      | RAP1A, member of RAS oncogene family Multiple_Complex             |
| TC0100014762.hg.1 | 7.17  | 6.03  | 2.21  | 8.76E-07 | 8.24E-06 | SSX2IP     | synovial sarcoma, X breakpoint 2 interacting p Multiple_Complex   |
| TC0800008183.hg.1 | 10.46 | 8.99  | 2.76  | 8.79E-07 | 8.27E-06 | OSGIN2     | oxidative stress induced growth inhibitor fami Multiple_Complex   |
| TC0200008099.hg.1 | 8.03  | 6.78  | 2.38  | 8.81E-07 | 8.29E-06 | HK2        | hexokinase 2 Multiple_Complex                                     |
| TC1700010041.hg.1 | 7.25  | 8.39  | -2.21 | 8.84E-07 | 8.32E-06 | AKAP10     | A kinase (PKA) anchor protein 10 Multiple_Complex                 |
| TC1600009514.hg.1 | 8.49  | 9.66  | -2.25 | 8.99E-07 | 8.45E-06 | RRN3       | RRN3 homolog, RNA polymerase I transcriptio Multiple_Complex      |
| TC2000009550.hg.1 | 7.73  | 6.91  | 1.77  | 9.00E-07 | 8.46E-06 | AURKA      | aurora kinase A Multiple_Complex                                  |
| TC0500012248.hg.1 | 6.95  | 5.42  | 2.88  | 9.05E-07 | 8.50E-06 | NDUFA2     | NADH dehydrogenase (ubiquinone) 1 alpha su Multiple_Complex       |
| TC0900012256.hg.1 | 7.57  | 5.8   | 3.41  | 9.06E-07 | 8.50E-06 | CDC14B     | cell division cycle 14B Multiple_Complex                          |
| TC0500008691.hg.1 | 12.98 | 11.63 | 2.56  | 9.11E-07 | 8.55E-06 | UBE2B      | ubiquitin conjugating enzyme E2B Multiple_Complex                 |
| TC1500008286.hg.1 | 7.64  | 9     | -2.57 | 9.14E-07 | 8.57E-06 | ZNF710     | zinc finger protein 710 Multiple_Complex                          |
| TC1100013100.hg.1 | 11.07 | 9.24  | 3.57  | 9.24E-07 | 8.66E-06 | ATP5L      | ATP synthase, H+ transporting, mitochondrial Multiple_Complex     |
| TC1700011038.hg.1 | 9.52  | 11.28 | -3.4  | 9.29E-07 | 8.70E-06 | ZNF652     | zinc finger protein 652 Multiple_Complex                          |
| TC1000008712.hg.1 | 5.12  | 6.76  | -3.11 | 9.35E-07 | 8.76E-06 | PPRC1      | peroxisome proliferator-activated receptor ga Multiple_Complex    |
| TC0900009946.hg.1 | 5.31  | 6.37  | -2.09 | 9.49E-07 | 8.88E-06 | SIT1       | signaling threshold regulating transmembrane Multiple_Complex     |
| TC0100008692.hg.1 | 9.56  | 10.54 | -1.97 | 9.54E-07 | 8.92E-06 | SRSF11     | serine/arginine-rich splicing factor 11 Multiple_Complex          |
| TC0700009020.hg.1 | 8.2   | 9.2   | -2    | 9.55E-07 | 8.93E-06 | SND1; SND  | staphylococcal nuclease and tudor domain coi Multiple_Complex     |
| TC1000008713.hg.1 | 7.79  | 9.07  | -2.42 | 9.56E-07 | 8.94E-06 | NOLC1      | nucleolar and coiled-body phosphoprotein 1 Multiple_Complex       |
| TC1200006520.hg.1 | 6.94  | 5.4   | 2.92  | 9.58E-07 | 8.95E-06 | TSPAN9     | tetraspanin 9 Multiple_Complex                                    |
| TC1500009004.hg.1 | 7.51  | 8.14  | -1.55 | 9.60E-07 | 8.97E-06 | AQR        | aquarius intron-binding spliceosomal factor Multiple_Complex      |
| TC0500010197.hg.1 | 7.41  | 6.55  | 1.81  | 9.67E-07 | 9.03E-06 | ZNF622     | zinc finger protein 622 Multiple_Complex                          |
| TC0900008223.hg.1 | 7.49  | 8.46  | -1.95 | 9.67E-07 | 9.03E-06 | INVS       | inversin Multiple_Complex                                         |
| TC0400010078.hg.1 | 5.03  | 6.39  | -2.56 | 9.68E-07 | 9.03E-06 | RAB28      | Jeck2013 ALT_ACCEPTOR, ALT_DONOR, codin NonCoding                 |
| TC0100013995.hg.1 | 6.43  | 7.33  | -1.86 | 9.73E-07 | 9.08E-06 | EIF2B3     | eukaryotic translation initiation factor 2B, sub Multiple_Complex |
| TC0100018299.hg.1 | 6.15  | 7.16  | -2.02 | 9.74E-07 | 9.08E-06 | SLC27A3    | solute carrier family 27 (fatty acid transporter Multiple_Complex |
| TC0100016973.hg.1 | 8     | 6.76  | 2.36  | 9.80E-07 | 9.13E-06 | CYB5R1     | cytochrome b5 reductase 1 Multiple_Complex                        |
| TC0100012167.hg.1 | 5.02  | 6.08  | -2.09 | 9.81E-07 | 9.14E-06 | KMO        | kynurenine 3-monooxygenase (kynurenine 3-l Multiple_Complex       |
| TC0400012947.hg.1 | 8.6   | 9.45  | -1.81 | 9.84E-07 | 9.16E-06 | GPRIN3     | GPRIN family member 3 Coding                                      |

|                      |       |       |       |          |          |           |                                                 |                  |
|----------------------|-------|-------|-------|----------|----------|-----------|-------------------------------------------------|------------------|
| TC1700010927.hg.1    | 10.53 | 11.55 | -2.03 | 9.87E-07 | 9.18E-06 | CDC27     | cell division cycle 27                          | Multiple_Complex |
| TC2000009782.hg.1    | 9.75  | 10.52 | -1.7  | 9.87E-07 | 9.18E-06 | DID01     | death inducer-obliterator 1                     | Multiple_Complex |
| TC1600007973.hg.1    | 7.09  | 8.2   | -2.16 | 9.93E-07 | 9.24E-06 | NUP93     | nucleoporin 93kDa                               | Multiple_Complex |
| TC0400006810.hg.1    | 5.97  | 4.73  | 2.36  | 9.96E-07 | 9.25E-06 | USP17L23  | ubiquitin specific peptidase 17-like family mer | Coding           |
| TC0400006800.hg.1    | 6.05  | 5.01  | 2.06  | 1.00E-06 | 9.31E-06 | USP17L18; | ubiquitin specific peptidase 17-like family mer | Coding           |
| TC0700007857.hg.1    | 9.7   | 10.78 | -2.1  | 1.01E-06 | 9.36E-06 | TMEM248   | transmembrane protein 248                       | Multiple_Complex |
| TC1200011846.hg.1    | 11.41 | 10.13 | 2.45  | 1.01E-06 | 9.40E-06 | CORO1C    | coronin, actin binding protein, 1C              | Multiple_Complex |
| TC0900010922.hg.1    | 5.02  | 6.32  | -2.46 | 1.01E-06 | 9.41E-06 | ZNF510    | zinc finger protein 510                         | Multiple_Complex |
| TC0700013420.hg.1    | 13.02 | 11.27 | 3.36  | 1.02E-06 | 9.44E-06 | ARPC1B    | actin related protein 2/3 complex subunit 1B    | Multiple_Complex |
| TC0400006789.hg.1    | 5.44  | 4.13  | 2.47  | 1.02E-06 | 9.48E-06 | USP17L13  | ubiquitin specific peptidase 17-like family mer | Coding           |
| TC2100008114.hg.1    | 4.09  | 3.24  | 1.8   | 1.02E-06 | 9.48E-06 | KCNJ6     | potassium channel, inwardly rectifying subfam   | Multiple_Complex |
| TC0600011441.hg.1    | 10.49 | 12.32 | -3.55 | 1.03E-06 | 9.50E-06 | BAG6      | BCL2 associated athanogene 6                    | Multiple_Complex |
| TC1800007218.hg.1    | 10.12 | 8.76  | 2.56  | 1.03E-06 | 9.51E-06 | C18orf25  | chromosome 18 open reading frame 25             | Multiple_Complex |
| TC1100010990.hg.1    | 7.01  | 8.42  | -2.66 | 1.03E-06 | 9.51E-06 | MRPL16    | mitochondrial ribosomal protein L16             | Multiple_Complex |
| TC1700012276.hg.1    | 5.54  | 6.59  | -2.06 | 1.03E-06 | 9.55E-06 | PNPO      | pyridoxamine 5-phosphate oxidase                | Multiple_Complex |
| TC1200011961.hg.1    | 5.61  | 7.16  | -2.93 | 1.05E-06 | 9.72E-06 | TMEM116   | transmembrane protein 116                       | Multiple_Complex |
| TC1700008842.hg.1    | 17.47 | 18.75 | -2.43 | 1.05E-06 | 9.72E-06 | RPL38     | ribosomal protein L38                           | Multiple_Complex |
| TC1900008240.hg.1    | 7.99  | 9.28  | -2.45 | 1.05E-06 | 9.72E-06 | ZNF283    | zinc finger protein 283                         | Multiple_Complex |
| TSUnmapped00000439.h | 6.11  | 5.14  | 1.96  | 1.05E-06 | 9.72E-06 | TRAPPC4   | trafficking protein particle complex 4          | Coding           |
| TC1900012021.hg.1    | 6.21  | 7.25  | -2.06 | 1.05E-06 | 9.73E-06 | ZNF841    | zinc finger protein 841                         | Multiple_Complex |
| TC0300009673.hg.1    | 9.57  | 8.53  | 2.05  | 1.06E-06 | 9.73E-06 | KLHL24    | kelch-like family member 24                     | Multiple_Complex |
| TC0800006978.hg.1    | 6.17  | 7.2   | -2.03 | 1.06E-06 | 9.73E-06 | POLR3D    | polymerase (RNA) III (DNA directed) polypepti   | Multiple_Complex |
| TC1900006687.hg.1    | 8.06  | 7     | 2.09  | 1.07E-06 | 9.85E-06 | AC007292. | Transcript Identified by AceView, Entrez Gene   | NonCoding        |
| TC0600011439.hg.1    | 7.4   | 8.46  | -2.09 | 1.07E-06 | 9.85E-06 | NCR3      | natural cytotoxicity triggering receptor 3      | Multiple_Complex |
| TSUnmapped00000180.h | 5.2   | 6.06  | -1.82 | 1.07E-06 | 9.87E-06 | KIAA1143  | KIAA1143 [Source:HGNC Symbol;Acc:HGNC:25        | Coding           |
| TC0700010275.hg.1    | 10.03 | 7.91  | 4.35  | 1.07E-06 | 9.87E-06 | NDUFA4    | NDUFA4, mitochondrial complex associated        | Multiple_Complex |
| TC1700009731.hg.1    | 9.23  | 7.78  | 2.73  | 1.07E-06 | 9.89E-06 | GAS7      | growth arrest-specific 7                        | Multiple_Complex |
| TC1200006700.hg.1    | 8.12  | 9.48  | -2.57 | 1.08E-06 | 9.90E-06 | FOXJ2     | forkhead box J2                                 | Multiple_Complex |
| TC1800009056.hg.1    | 5.95  | 7.31  | -2.57 | 1.08E-06 | 9.90E-06 | ZADH2     | zinc binding alcohol dehydrogenase domain c     | Coding           |
| TC1000008467.hg.1    | 9.87  | 8.94  | 1.9   | 1.08E-06 | 9.92E-06 | 5-Mar     | membrane associated ring finger 5               | Multiple_Complex |
| TC1600008128.hg.1    | 7.17  | 8.18  | -2.02 | 1.09E-06 | 9.96E-06 | CMTM3     | CKLF-like MARVEL transmembrane domain co        | Multiple_Complex |
| TC1100012508.hg.1    | 14.59 | 10.8  | 13.91 | 1.09E-06 | 9.96E-06 | RPS25     | ribosomal protein S25                           | Multiple_Complex |
| TC0500008641.hg.1    | 7.69  | 9.28  | -3.02 | 1.09E-06 | 1.00E-05 | RAD50     | RAD50 homolog, double strand break repair p     | Multiple_Complex |
| TC2200008829.hg.1    | 5.43  | 6.5   | -2.1  | 1.09E-06 | 1.00E-05 | POLR3H    | polymerase (RNA) III (DNA directed) polypepti   | Multiple_Complex |
| TC1300008660.hg.1    | 5.89  | 7.52  | -3.09 | 1.10E-06 | 1.01E-05 | PROSER1   | proline and serine rich 1                       | Multiple_Complex |
| TC1000006796.hg.1    | 7.61  | 6.3   | 2.48  | 1.10E-06 | 1.01E-05 | SEC61A2   | Sec61 translocon alpha 2 subunit                | Multiple_Complex |
| TC0400006785.hg.1    | 6.23  | 4.85  | 2.59  | 1.10E-06 | 1.01E-05 | USP17L11; | ubiquitin specific peptidase 17-like family mer | Coding           |
| TC1700009801.hg.1    | 5.89  | 6.68  | -1.74 | 1.11E-06 | 1.02E-05 | ELAC2     | elaC ribonuclease Z 2                           | Multiple_Complex |
| TC2100008297.hg.1    | 6.53  | 5.07  | 2.75  | 1.12E-06 | 1.03E-05 | SIK1      | salt-inducible kinase 1                         | Multiple_Complex |
| TC0600013409.hg.1    | 7.02  | 8.21  | -2.29 | 1.12E-06 | 1.03E-05 | HIVP2     | human immunodeficiency virus type I enhanci     | Multiple_Complex |
| TC1900010011.hg.1    | 7.78  | 8.5   | -1.64 | 1.13E-06 | 1.03E-05 | LSM4      | LSM4 homolog, U6 small nuclear RNA and mR       | Multiple_Complex |
| TSUnmapped00000475.h | 9.94  | 7.92  | 4.06  | 1.13E-06 | 1.03E-05 | PADI4     | peptidyl arginine deiminase, type IV            | NonCoding        |
| TC0300006493.hg.1    | 7.13  | 6.02  | 2.16  | 1.13E-06 | 1.03E-05 | EDEM1     | Transcript Identified by AceView, Entrez Gene   | Unassigned       |
| TC0800008150.hg.1    | 9.04  | 8.17  | 1.82  | 1.13E-06 | 1.03E-05 | CPNE3     | copine III                                      | Multiple_Complex |
| TC0600007864.hg.1    | 6.64  | 8.06  | -2.67 | 1.13E-06 | 1.03E-05 | TBC1D22B  | TBC1 domain family, member 22B                  | Multiple_Complex |
| TC1600011494.hg.1    | 10.61 | 9.45  | 2.23  | 1.14E-06 | 1.04E-05 | ARL6IP1   | ADP-ribosylation factor like GTPase 6 interacti | Multiple_Complex |
| TC0100008073.hg.1    | 5.6   | 6.86  | -2.4  | 1.15E-06 | 1.05E-05 | KDM4A     | lysine (K)-specific demethylase 4A              | Multiple_Complex |
| TC0300010299.hg.1    | 9.8   | 8.33  | 2.79  | 1.15E-06 | 1.05E-05 | RAF1      | Raf-1 proto-oncogene, serine/threonine kinas    | Multiple_Complex |
| TC0300011200.hg.1    | 13.39 | 11.87 | 2.87  | 1.15E-06 | 1.05E-05 | TKT       | transketolase                                   | Multiple_Complex |
| TC1700010590.hg.1    | 6.66  | 7.61  | -1.93 | 1.16E-06 | 1.06E-05 | GSDMB     | gasdermin B                                     | Multiple_Complex |
| TC0300013908.hg.1    | 10.01 | 8.53  | 2.8   | 1.17E-06 | 1.07E-05 | FXR1      | fragile X mental retardation, autosomal homo    | Multiple_Complex |
| TC2200008067.hg.1    | 5.69  | 6.87  | -2.27 | 1.17E-06 | 1.07E-05 | THAP7     | THAP domain containing 7                        | Multiple_Complex |
| TC0X00007267.hg.1    | 4.68  | 5.86  | -2.26 | 1.17E-06 | 1.07E-05 | MAGED1    | MAGE family member D1                           | Multiple_Complex |
| TC1600009200.hg.1    | 4.4   | 5.58  | -2.27 | 1.18E-06 | 1.07E-05 | TRAP1     | TNF receptor-associated protein 1               | Multiple_Complex |
| TC1300009218.hg.1    | 6.03  | 4.74  | 2.44  | 1.18E-06 | 1.07E-05 | DACH1     | dachshund family transcription factor 1         | Multiple_Complex |
| TC1100013007.hg.1    | 10.23 | 9.51  | 1.65  | 1.19E-06 | 1.08E-05 | ZFP91-CNT | ZFP91-CNTF readthrough (NMD candidate)          | Multiple_Complex |
| TC1600010794.hg.1    | 8.11  | 7.11  | 2     | 1.19E-06 | 1.08E-05 | AP1G1     | adaptor-related protein complex 1, gamma 1 :    | Multiple_Complex |
| TC0300006827.hg.1    | 6.26  | 7.6   | -2.52 | 1.19E-06 | 1.08E-05 | UBE2E2    | ubiquitin conjugating enzyme E2E 2              | Multiple_Complex |
| TC0200009299.hg.1    | 4.67  | 5.93  | -2.4  | 1.20E-06 | 1.09E-05 | IMP4      | IMP4 homolog, U3 small nucleolar ribonucleo     | Multiple_Complex |
| TC1400007354.hg.1    | 13.97 | 12.46 | 2.84  | 1.20E-06 | 1.09E-05 | PPM1A     | protein phosphatase, Mg2+/Mn2+ dependent        | Multiple_Complex |
| TC0600007657.hg.1    | 8.55  | 11.07 | -5.75 | 1.20E-06 | 1.09E-05 | HLA-DQA1  | major histocompatibility complex, class II, DQ  | Multiple_Complex |
| TC2200009338.hg.1    | 5.58  | 6.52  | -1.93 | 1.20E-06 | 1.09E-05 | TBC1D10A  | TBC1 domain family, member 10A                  | Multiple_Complex |
| TC2000007488.hg.1    | 8.45  | 9.57  | -2.17 | 1.21E-06 | 1.10E-05 | PIGT      | phosphatidylinositol glycan anchor biosynthes   | Multiple_Complex |
| TC0X00007127.hg.1    | 6.1   | 6.97  | -1.84 | 1.21E-06 | 1.10E-05 | RBM10     | RNA binding motif protein 10                    | Multiple_Complex |
| TC1700012199.hg.1    | 4.77  | 6.1   | -2.53 | 1.22E-06 | 1.11E-05 | PIGL      | phosphatidylinositol glycan anchor biosynthes   | NonCoding        |
| TC2100007935.hg.1    | 11.09 | 12.33 | -2.36 | 1.23E-06 | 1.11E-05 | SCAF4     | SR-related CTD-associated factor 4              | Multiple_Complex |
| TC0300013866.hg.1    | 6.28  | 7.43  | -2.23 | 1.23E-06 | 1.11E-05 | ALG1L2    | ALG1, chitobiosyldiphosphodolichol beta-man     | Multiple_Complex |
| TC0100008772.hg.1    | 8.42  | 7.56  | 1.82  | 1.23E-06 | 1.11E-05 | RABGGTB   | Zhang2013 ALT_ACCEPTOR, ALT_DONOR, cod          | NonCoding        |
| TC0900008902.hg.1    | 6.36  | 7.54  | -2.28 | 1.25E-06 | 1.13E-05 | PPP2R4    | protein phosphatase 2A activator, regulatory :  | Multiple_Complex |
| TC2200008654.hg.1    | 10.02 | 11.18 | -2.24 | 1.25E-06 | 1.13E-05 | MFNG      | MFNG O-fucosylpeptide 3-beta-N-acetylgluco:     | Multiple_Complex |

|                      |       |       |       |          |          |            |                                                  |                  |
|----------------------|-------|-------|-------|----------|----------|------------|--------------------------------------------------|------------------|
| TC100006862.hg.1     | 6.65  | 4.62  | 4.09  | 1.26E-06 | 1.14E-05 | OLAH       | oleoyl-ACP hydrolase                             | Multiple_Complex |
| TC0600011483.hg.1    | 11.65 | 10.33 | 2.5   | 1.27E-06 | 1.15E-05 | PBX2       | pre-B-cell leukemia homeobox 2                   | Multiple_Complex |
| TC1400007201.hg.1    | 5.18  | 4.33  | 1.81  | 1.28E-06 | 1.15E-05 | CDKN3      | cyclin-dependent kinase inhibitor 3              | Multiple_Complex |
| TC1700012191.hg.1    | 12.62 | 14.13 | -2.84 | 1.28E-06 | 1.16E-05 | CD68       | CD68 molecule                                    | Coding           |
| TC1200007706.hg.1    | 7.46  | 8.35  | -1.85 | 1.29E-06 | 1.16E-05 | MFSD5      | major facilitator superfamily domain containi    | Multiple_Complex |
| TC0800011139.hg.1    | 7.88  | 8.8   | -1.89 | 1.29E-06 | 1.16E-05 | KIAA1429   | KIAA1429                                         | Multiple_Complex |
| TC0700009827.hg.1    | 11.08 | 12.09 | -2.02 | 1.29E-06 | 1.16E-05 | RBM33      | RNA binding motif protein 33                     | Multiple_Complex |
| TC1000008575.hg.1    | 6.93  | 7.72  | -1.73 | 1.30E-06 | 1.17E-05 | ZDHHC16    | zinc finger, DHHC-type containing 16             | Multiple_Complex |
| TC2100006974.hg.1    | 10.05 | 11.04 | -1.98 | 1.30E-06 | 1.17E-05 | SON; MIR6  | SON DNA binding protein; microRNA 6501           | Multiple_Complex |
| TC1000010982.hg.1    | 6.86  | 5.26  | 3.01  | 1.30E-06 | 1.17E-05 | ASCC1      | Transcript Identified by AceView, Entrez Gene    | Coding           |
| TC0800011006.hg.1    | 5.35  | 4.17  | 2.28  | 1.31E-06 | 1.18E-05 | REXO1L2P;  | Homo sapiens REX1, RNA exonuclease 1 homc        | Multiple_Complex |
| TC0100018180.hg.1    | 5.1   | 4.28  | 1.77  | 1.31E-06 | 1.18E-05 | CLCNKA     | chloride channel, voltage-sensitive Ka           | Multiple_Complex |
| TC1200006701.hg.1    | 8.79  | 7.72  | 2.1   | 1.32E-06 | 1.18E-05 | NECAP1     | NECAP endocytosis associated 1                   | Multiple_Complex |
| TSUnmapped00000492.h | 5.46  | 6.36  | -1.88 | 1.32E-06 | 1.19E-05 | KAT6B      | K(lysine) acetyltransferase 6B                   | Coding           |
| TC1200010518.hg.1    | 11.75 | 13.31 | -2.94 | 1.33E-06 | 1.19E-05 | SLC38A2    | solute carrier family 38, member 2               | Multiple_Complex |
| TC1700009402.hg.1    | 4.96  | 6.6   | -3.14 | 1.33E-06 | 1.19E-05 | SMYD4      | SET and MYND domain containing 4                 | Multiple_Complex |
| TC2000007337.hg.1    | 8.97  | 7.94  | 2.04  | 1.34E-06 | 1.20E-05 | PPP1R16B   | Transcript Identified by AceView, Entrez Gene    | Unassigned       |
| TC1500009185.hg.1    | 9.47  | 8.36  | 2.15  | 1.35E-06 | 1.21E-05 | TMEM87A    | transmembrane protein 87A                        | Multiple_Complex |
| TC0100018260.hg.1    | 11.3  | 9.07  | 4.69  | 1.36E-06 | 1.22E-05 | AMPD2      | adenosine monophosphate deaminase 2              | Multiple_Complex |
| TC1900011794.hg.1    | 8.08  | 9.41  | -2.52 | 1.37E-06 | 1.23E-05 | ZNF701; Zh | zinc finger protein 701; zinc finger protein 137 | Multiple_Complex |
| TC1100011097.hg.1    | 4.78  | 6     | -2.33 | 1.38E-06 | 1.24E-05 | ZBTB3      | zinc finger and BTB domain containing 3          | Multiple_Complex |
| TC2200009266.hg.1    | 9.22  | 7.99  | 2.36  | 1.38E-06 | 1.24E-05 | GTPBP1     | GTP binding protein 1                            | Multiple_Complex |
| TC1700011418.hg.1    | 6.43  | 7.43  | -2    | 1.39E-06 | 1.24E-05 | LIMD2      | LIM domain containing 2                          | Multiple_Complex |
| TC1200011820.hg.1    | 8.08  | 9.39  | -2.48 | 1.39E-06 | 1.24E-05 | PRDM4      | PR domain containing 4                           | Multiple_Complex |
| TC0200010852.hg.1    | 6.15  | 7.03  | -1.84 | 1.39E-06 | 1.25E-05 | GMPPA      | GDP-mannose pyrophosphorylase A                  | Multiple_Complex |
| TC0100011414.hg.1    | 14.66 | 12.23 | 5.38  | 1.39E-06 | 1.25E-05 | CR1        | complement component (3b/4b) receptor 1 (f       | Multiple_Complex |
| TC0600010057.hg.1    | 6.41  | 5.59  | 1.76  | 1.40E-06 | 1.25E-05 | ACAT2      | acetyl-CoA acetyltransferase 2                   | Multiple_Complex |
| TC0X00008540.hg.1    | 4.32  | 5.91  | -3.03 | 1.40E-06 | 1.25E-05 | CD40LG     | CD40 ligand                                      | Multiple_Complex |
| TC0200016683.hg.1    | 5.58  | 6.56  | -1.98 | 1.41E-06 | 1.25E-05 | C2orf42    | chromosome 2 open reading frame 42               | Multiple_Complex |
| TC0900011496.hg.1    | 9.27  | 7.95  | 2.5   | 1.41E-06 | 1.25E-05 | PSMB7      | proteasome subunit beta 7                        | Multiple_Complex |
| TC0200016772.hg.1    | 5.62  | 6.95  | -2.51 | 1.41E-06 | 1.26E-05 | NHEJ1      | nonhomologous end-joining factor 1               | Multiple_Complex |
| TC0300013428.hg.1    | 13.32 | 12.33 | 1.99  | 1.42E-06 | 1.27E-05 | TRA2B      | transformer 2 beta homolog (Drosophila)          | Multiple_Complex |
| TC0800009988.hg.1    | 5.59  | 7.1   | -2.85 | 1.42E-06 | 1.27E-05 | INTS9      | integrator complex subunit 9                     | Multiple_Complex |
| TC0500009100.hg.1    | 7.68  | 6.9   | 1.71  | 1.43E-06 | 1.27E-05 | SMIM3      | small integral membrane protein 3                | Multiple_Complex |
| TC0700013472.hg.1    | 14.12 | 10.73 | 10.48 | 1.43E-06 | 1.27E-05 | MGAM       | maltase-glucoamylase                             | Multiple_Complex |
| TC1700007720.hg.1    | 10.17 | 9.09  | 2.11  | 1.43E-06 | 1.27E-05 | PSMB3      | proteasome subunit beta 3                        | Multiple_Complex |
| TC1600008020.hg.1    | 10.17 | 9.15  | 2.02  | 1.44E-06 | 1.28E-05 | USB1       | U6 snRNA biogenesis 1                            | Multiple_Complex |
| TC2100008286.hg.1    | 10.51 | 9.47  | 2.06  | 1.44E-06 | 1.28E-05 | U2AF1      | U2 small nuclear RNA auxiliary factor 1          | Multiple_Complex |
| TC0200006583.hg.1    | 5.14  | 6.22  | -2.1  | 1.44E-06 | 1.28E-05 | RNF144A    | ring finger protein 144A                         | Multiple_Complex |
| TC0X00006623.hg.1    | 8.14  | 9.18  | -2.05 | 1.45E-06 | 1.29E-05 | PRPS2      | phosphoribosyl pyrophosphate synthetase 2        | Multiple_Complex |
| TC1200011599.hg.1    | 14.22 | 12.12 | 4.27  | 1.46E-06 | 1.30E-05 | LTA4H      | leukotriene A4 hydrolase                         | Multiple_Complex |
| TC2200009248.hg.1    | 9.33  | 7.31  | 4.03  | 1.47E-06 | 1.31E-05 | KREMEN1    | kringle containing transmembrane protein 1       | Multiple_Complex |
| TC1200007053.hg.1    | 5.76  | 3.85  | 3.76  | 1.47E-06 | 1.31E-05 | SPX        | spexin hormone                                   | Multiple_Complex |
| TC1900011061.hg.1    | 10.19 | 11.4  | -2.31 | 1.47E-06 | 1.31E-05 | CARD8      | caspace recruitment domain family, member i      | Multiple_Complex |
| TC0100017107.hg.1    | 5.43  | 4.37  | 2.08  | 1.48E-06 | 1.31E-05 | IL10       | interleukin 10                                   | Multiple_Complex |
| TC0X00006764.hg.1    | 6.4   | 7.24  | -1.79 | 1.48E-06 | 1.31E-05 | MBTPS2; Y  | membrane bound transcription factor peptida      | Multiple_Complex |
| TC0100014284.hg.1    | 8.28  | 9.93  | -3.14 | 1.48E-06 | 1.31E-05 | USP24      | ubiquitin specific peptidase 24                  | Multiple_Complex |
| TC1600007829.hg.1    | 11.04 | 9.93  | 2.17  | 1.49E-06 | 1.32E-05 | CYLD       | cylindromatosis (turban tumor syndrome)          | Multiple_Complex |
| TC1900011860.hg.1    | 6.13  | 7.38  | -2.37 | 1.50E-06 | 1.32E-05 | DNMT1      | DNA (cytosine-5-)-methyltransferase 1            | Multiple_Complex |
| TC1700010218.hg.1    | 10.95 | 9.31  | 3.12  | 1.50E-06 | 1.33E-05 | FLOT2      | flotillin 2                                      | Multiple_Complex |
| TC1500008757.hg.1    | 6.87  | 8.16  | -2.44 | 1.50E-06 | 1.33E-05 | ATP10A     | ATPase, class V, type 10A                        | Multiple_Complex |
| TC0100012534.hg.1    | 6.3   | 7.19  | -1.85 | 1.52E-06 | 1.34E-05 | PANK4      | pantothenate kinase 4                            | Multiple_Complex |
| TC1100007366.hg.1    | 8.67  | 9.77  | -2.14 | 1.52E-06 | 1.34E-05 | TTC17      | tetratricopeptide repeat domain 17               | Multiple_Complex |
| TC1600008178.hg.1    | 5.37  | 6.39  | -2.03 | 1.52E-06 | 1.35E-05 | PSKH1      | protein serine kinase H1                         | Multiple_Complex |
| TC0400006816.hg.1    | 5.67  | 4.82  | 1.8   | 1.53E-06 | 1.35E-05 | USP17L26;  | ubiquitin specific peptidase 17-like family mer  | Coding           |
| TC0500010511.hg.1    | 5.37  | 6.42  | -2.07 | 1.53E-06 | 1.35E-05 | C5orf42    | chromosome 5 open reading frame 42               | Multiple_Complex |
| TC0500008921.hg.1    | 10.62 | 11.68 | -2.08 | 1.53E-06 | 1.35E-05 | NDFIP1     | Nedd4 family interacting protein 1               | Multiple_Complex |
| TC1700007638.hg.1    | 10.64 | 9.46  | 2.27  | 1.54E-06 | 1.36E-05 | GGNBP2     | gametogenetin binding protein 2                  | Multiple_Complex |
| TC0800006738.hg.1    | 6.12  | 7.54  | -2.67 | 1.55E-06 | 1.36E-05 | MTMR9      | myotubularin related protein 9                   | Multiple_Complex |
| TC0100007716.hg.1    | 6.54  | 7.48  | -1.92 | 1.56E-06 | 1.37E-05 | ZNF362     | zinc finger protein 362                          | Multiple_Complex |
| TC0800008131.hg.1    | 5.72  | 4.81  | 1.88  | 1.56E-06 | 1.38E-05 | REXO1L11F  | REX1, RNA exonuclease 1 homolog-like 11, psr     | Multiple_Complex |
| TC0100018552.hg.1    | 5.97  | 5.22  | 1.68  | 1.57E-06 | 1.38E-05 | CHIT1      | chitinase 1 (chitotriosidase)                    | NonCoding        |
| TC0200011890.hg.1    | 6.42  | 5.11  | 2.48  | 1.57E-06 | 1.38E-05 | LAPTM4A    | Memczak2013 ALT_ACCEPTOR, ALT_DONOR,             | NonCoding        |
| TC0100018539.hg.1    | 5.28  | 6.39  | -2.15 | 1.57E-06 | 1.38E-05 | LHX4-AS1;  | LHX4 antisense RNA 1; acyl-CoA binding doma      | NonCoding        |
| TC0600014198.hg.1    | 7.59  | 8.61  | -2.02 | 1.58E-06 | 1.39E-05 | TULP4      | tubby like protein 4                             | Multiple_Complex |
| TC0600014362.hg.1    | 5.38  | 6.47  | -2.13 | 1.59E-06 | 1.40E-05 | TFB1M      | transcription factor B1, mitochondrial           | Multiple_Complex |
| TC1700007636.hg.1    | 4.62  | 5.57  | -1.94 | 1.59E-06 | 1.40E-05 | PIGW       | phosphatidylinositol glycan anchor biosynthes    | Coding           |
| TC0500012498.hg.1    | 9.31  | 10.61 | -2.47 | 1.60E-06 | 1.40E-05 | ANXA6      | annexin A6                                       | Multiple_Complex |
| TC0100013696.hg.1    | 9.45  | 10.33 | -1.84 | 1.60E-06 | 1.41E-05 | PSMB2      | proteasome subunit beta 2                        | Multiple_Complex |
| TC2000008755.hg.1    | 5.81  | 6.62  | -1.75 | 1.61E-06 | 1.41E-05 | ZNF337     | zinc finger protein 337                          | Multiple_Complex |

|                      |       |       |       |          |          |            |                                                |                  |
|----------------------|-------|-------|-------|----------|----------|------------|------------------------------------------------|------------------|
| TSUnmapped00000546.h | 7.29  | 8.19  | -1.86 | 1.61E-06 | 1.41E-05 | RCC2       | regulator of chromosome condensation 2         | Coding           |
| TC1900011990.hg.1    | 12.12 | 13.89 | -3.4  | 1.61E-06 | 1.42E-05 | RPL18      | ribosomal protein L18                          | Multiple_Complex |
| TC1600010500.hg.1    | 6     | 7.11  | -2.16 | 1.64E-06 | 1.43E-05 | GOT2       | glutamic-oxaloacetic transaminase 2, mitocho   | Multiple_Complex |
| TC1700010050.hg.1    | 10.38 | 12.15 | -3.42 | 1.64E-06 | 1.44E-05 | LGALS9B    | lectin, galactoside-binding, soluble, 9B       | Multiple_Complex |
| TC1900007908.hg.1    | 13.53 | 15.07 | -2.91 | 1.64E-06 | 1.44E-05 | CAPNS1     | calpain, small subunit 1                       | Multiple_Complex |
| TC1700006653.hg.1    | 9.43  | 7.19  | 4.74  | 1.64E-06 | 1.44E-05 | GP1BA      | glycoprotein Ib (platelet), alpha polypeptide  | Coding           |
| TC1700011424.hg.1    | 9.42  | 10.32 | -1.86 | 1.65E-06 | 1.44E-05 | SMARCD2    | SWI/SNF related, matrix associated, actin dep  | Multiple_Complex |
| TC0400008007.hg.1    | 9.28  | 7.55  | 3.32  | 1.65E-06 | 1.45E-05 | GPAT3      | glycerol-3-phosphate acyltransferase 3         | Multiple_Complex |
| TC0800010685.hg.1    | 5.82  | 8.2   | -5.2  | 1.66E-06 | 1.45E-05 | MYBL1      | v-myb avian myeloblastosis viral oncogene ho   | Multiple_Complex |
| TC0700008147.hg.1    | 9.16  | 10.71 | -2.93 | 1.66E-06 | 1.45E-05 | RSBN1L     | round spermatid basic protein 1-like           | Multiple_Complex |
| TC0800008321.hg.1    | 4.94  | 3.54  | 2.63  | 1.67E-06 | 1.46E-05 | LAPTM4B    | lysosomal protein transmembrane 4 beta         | Multiple_Complex |
| TC1200009524.hg.1    | 5.5   | 6.59  | -2.12 | 1.69E-06 | 1.47E-05 | ZNF84      | zinc finger protein 84                         | Multiple_Complex |
| TC1900008993.hg.1    | 4.58  | 5.55  | -1.96 | 1.71E-06 | 1.49E-05 | ZNF304     | zinc finger protein 304                        | Multiple_Complex |
| TC0100006861.hg.1    | 6.33  | 7.1   | -1.71 | 1.71E-06 | 1.49E-05 | FBXO44     | F-box protein 44                               | Multiple_Complex |
| TC0800008126.hg.1    | 9.19  | 8     | 2.28  | 1.74E-06 | 1.51E-05 | CA2        | carbonic anhydrase II                          | Multiple_Complex |
| TC0100018398.hg.1    | 7.7   | 8.63  | -1.91 | 1.74E-06 | 1.51E-05 | TNFRSF25   | tumor necrosis factor receptor superfamily, m  | Multiple_Complex |
| TSUnmapped00000171.h | 6.77  | 5.46  | 2.49  | 1.74E-06 | 1.51E-05 | TRAPP4     | trafficking protein particle complex 4         | Coding           |
| TC0300008290.hg.1    | 8.93  | 10.81 | -3.7  | 1.74E-06 | 1.51E-05 | TRAT1      | T cell receptor associated transmembrane ad    | Multiple_Complex |
| TC2200008781.hg.1    | 9.64  | 10.75 | -2.17 | 1.74E-06 | 1.52E-05 | MKL1       | megakaryoblastic leukemia (translocation) 1    | Multiple_Complex |
| TC0300013828.hg.1    | 9.48  | 10.47 | -1.99 | 1.75E-06 | 1.53E-05 | RBM6       | RNA binding motif protein 6                    | Multiple_Complex |
| TC0100010532.hg.1    | 4.97  | 6.59  | -3.08 | 1.76E-06 | 1.53E-05 | XCL1       | chemokine (C motif) ligand 1                   | Coding           |
| TC1900011172.hg.1    | 10.52 | 11.95 | -2.69 | 1.76E-06 | 1.53E-05 | VRK3       | vaccinia related kinase 3                      | Multiple_Complex |
| TC0700011054.hg.1    | 6.54  | 4.93  | 3.04  | 1.76E-06 | 1.53E-05 | GRB10      | growth factor receptor bound protein 10        | Multiple_Complex |
| TC0500008156.hg.1    | 7.36  | 10.83 | -11.1 | 1.79E-06 | 1.56E-05 | ERAP2      | endoplasmic reticulum aminopeptidase 2         | Multiple_Complex |
| TC0X00006658.hg.1    | 6.56  | 7.96  | -2.64 | 1.82E-06 | 1.58E-05 | OFD1       | oral-facial-digital syndrome 1                 | Multiple_Complex |
| TC0400009284.hg.1    | 10.36 | 8.94  | 2.66  | 1.82E-06 | 1.58E-05 | CLCN3      | chloride channel, voltage-sensitive 3          | Multiple_Complex |
| TC2000006628.hg.1    | 5.31  | 6.97  | -3.16 | 1.83E-06 | 1.59E-05 | MCM8       | minichromosome maintenance 8 homologous        | Multiple_Complex |
| TC1700011181.hg.1    | 10.7  | 8.53  | 4.48  | 1.84E-06 | 1.60E-05 | MMD        | monocyte to macrophage differentiation-asso    | Multiple_Complex |
| TC0100017488.hg.1    | 13.24 | 11.98 | 2.38  | 1.85E-06 | 1.60E-05 | LBR        | lamin B receptor                               | Multiple_Complex |
| TC1300008250.hg.1    | 5.12  | 3.97  | 2.22  | 1.85E-06 | 1.60E-05 | GJB6       | gap junction protein beta 6                    | Multiple_Complex |
| TC1400007087.hg.1    | 6.73  | 7.82  | -2.13 | 1.85E-06 | 1.60E-05 | MGAT2      | mannosyl (alpha-1,6-)-glycoprotein beta-1,2-N  | Coding           |
| TC1100009408.hg.1    | 6.23  | 7.39  | -2.24 | 1.87E-06 | 1.62E-05 | SLC37A2    | solute carrier family 37 (glucose-6-phosphate  | Multiple_Complex |
| TC0700007374.hg.1    | 8.55  | 7.7   | 1.8   | 1.87E-06 | 1.62E-05 | YKT6       | YKT6 v-SNARE homolog (S. cerevisiae)           | Multiple_Complex |
| TC1400009714.hg.1    | 9.64  | 10.78 | -2.19 | 1.88E-06 | 1.62E-05 | TMED10     | transmembrane p24 trafficking protein 10       | Multiple_Complex |
| TC0700007479.hg.1    | 6.72  | 4.9   | 3.53  | 1.88E-06 | 1.62E-05 | ABCA13     | ATP binding cassette subfamily A member 13     | Multiple_Complex |
| TC2100007668.hg.1    | 9.61  | 10.65 | -2.06 | 1.89E-06 | 1.63E-05 | C21orf91;  | chromosome 21 open reading frame 91; C21o      | Multiple_Complex |
| TC0100007091.hg.1    | 9.37  | 8.19  | 2.27  | 1.89E-06 | 1.63E-05 | CROCC      | Zhang2013 ALT_ACCEPTOR, ALT_DONOR, cod         | NonCoding        |
| TC0700007098.hg.1    | 9.16  | 10.07 | -1.89 | 1.89E-06 | 1.63E-05 | GARS       | glycyl-tRNA synthetase                         | Multiple_Complex |
| TC0X00010426.hg.1    | 8.1   | 6.9   | 2.3   | 1.90E-06 | 1.64E-05 | MORF4L2    | mortality factor 4 like 2                      | Multiple_Complex |
| TC1000010115.hg.1    | 11.35 | 10.4  | 1.94  | 1.90E-06 | 1.64E-05 | YME1L1     | YME1-like 1 ATPase                             | Multiple_Complex |
| TC0800011259.hg.1    | 5.68  | 6.74  | -2.07 | 1.90E-06 | 1.64E-05 | ANKRD46    | ankyrin repeat domain 46                       | Multiple_Complex |
| TC0700007633.hg.1    | 7.75  | 8.59  | -1.8  | 1.90E-06 | 1.64E-05 | SUMF2      | sulfatase modifying factor 2                   | Multiple_Complex |
| TC1600008328.hg.1    | 5.86  | 6.69  | -1.78 | 1.91E-06 | 1.65E-05 | DHODH      | dihydroorotate dehydrogenase (quinone)         | Multiple_Complex |
| TC1700006773.hg.1    | 7.67  | 6.26  | 2.66  | 1.92E-06 | 1.65E-05 | TMEM88     | transmembrane protein 88                       | Coding           |
| TC0800010880.hg.1    | 4.74  | 5.68  | -1.93 | 1.93E-06 | 1.66E-05 | IL7        | interleukin 7                                  | Multiple_Complex |
| TC0200016496.hg.1    | 5.74  | 6.81  | -2.09 | 1.93E-06 | 1.67E-05 | CNNM3      | cyclin and CBS domain divalent metal cation ti | Multiple_Complex |
| TC1800006437.hg.1    | 8.45  | 9.46  | -2.01 | 1.94E-06 | 1.67E-05 | USP14      | ubiquitin specific peptidase 14 (tRNA-guanine  | Multiple_Complex |
| TC0700013618.hg.1    | 4.64  | 5.74  | -2.15 | 1.95E-06 | 1.68E-05 | MGC27345   | uncharacterized protein MGC27345               | Multiple_Complex |
| TC0900011634.hg.1    | 4.66  | 5.59  | -1.91 | 1.95E-06 | 1.68E-05 | TRUB2      | TruB pseudouridine (psi) synthase family men   | Multiple_Complex |
| TC0200015729.hg.1    | 6.04  | 7.15  | -2.16 | 1.95E-06 | 1.68E-05 | USP37      | ubiquitin specific peptidase 37                | Multiple_Complex |
| TC1100010058.hg.1    | 10.43 | 9.06  | 2.59  | 1.96E-06 | 1.68E-05 | DENND5A    | DENN/MADD domain containing 5A                 | Multiple_Complex |
| TC1100010207.hg.1    | 5.25  | 6.44  | -2.28 | 1.96E-06 | 1.69E-05 | SOX6; MIRt | SRY box 6; microRNA 6073                       | Multiple_Complex |
| TC0200013137.hg.1    | 5.04  | 6.04  | -1.99 | 1.96E-06 | 1.69E-05 | GCFC2      | GC-rich sequence DNA-binding factor 2          | Multiple_Complex |
| TSUnmapped00000597.h | 9.53  | 10.67 | -2.21 | 1.97E-06 | 1.69E-05 | PSMC4      | proteasome 26S subunit, ATPase 4 [Source:HC    | Coding           |
| TC0300009856.hg.1    | 5.94  | 5.18  | 1.69  | 1.97E-06 | 1.69E-05 | IL1RAP     | interleukin 1 receptor accessory protein       | NonCoding        |
| TC1300006690.hg.1    | 9.16  | 10.43 | -2.4  | 1.97E-06 | 1.69E-05 | POLR1D     | polymerase (RNA) I polypeptide D               | Multiple_Complex |
| TC1200007295.hg.1    | 6.14  | 7.18  | -2.05 | 1.98E-06 | 1.70E-05 | ALG10      | ALG10, alpha-1,2-glucosyltransferase           | Multiple_Complex |
| TC0X00010804.hg.1    | 5.33  | 6.74  | -2.66 | 1.99E-06 | 1.70E-05 | ZNF280C    | zinc finger protein 280C                       | Multiple_Complex |
| TC0300012857.hg.1    | 8.31  | 9.39  | -2.11 | 1.99E-06 | 1.71E-05 | DHX36      | DEAH (Asp-Glu-Ala-His) box polypeptide 36      | Multiple_Complex |
| TC1500010724.hg.1    | 8.19  | 9.29  | -2.14 | 2.02E-06 | 1.73E-05 | GANC       | glucosidase, alpha; neutral C                  | Multiple_Complex |
| TC0400008105.hg.1    | 8.15  | 9.85  | -3.25 | 2.02E-06 | 1.73E-05 | HERC6      | HECT and RLD domain containing E3 ubiquitin    | Multiple_Complex |
| TC1300008171.hg.1    | 7.96  | 9.54  | -2.99 | 2.02E-06 | 1.73E-05 | CDC16      | cell division cycle 16                         | Multiple_Complex |
| TC1900008925.hg.1    | 6.54  | 7.67  | -2.19 | 2.02E-06 | 1.73E-05 | U2AF2      | Memczak2013 ALT_ACCEPTOR, ALT_DONOR,           | NonCoding        |
| TC0200008569.hg.1    | 7.56  | 8.57  | -2.01 | 2.03E-06 | 1.73E-05 | INPP4A     | inositol polyphosphate-4-phosphatase type I /  | Multiple_Complex |
| TC0100014774.hg.1    | 7.66  | 6.58  | 2.11  | 2.05E-06 | 1.75E-05 | C1orf52    | chromosome 1 open reading frame 52             | Multiple_Complex |
| TC0600014267.hg.1    | 10.89 | 12.37 | -2.77 | 2.05E-06 | 1.75E-05 | ATF6B      | activating transcription factor 6 beta         | Multiple_Complex |
| TC0700006727.hg.1    | 6.73  | 7.68  | -1.94 | 2.05E-06 | 1.75E-05 | TMEM106f   | transmembrane protein 106B                     | Multiple_Complex |
| TC1000010497.hg.1    | 10.14 | 12.33 | -4.57 | 2.06E-06 | 1.76E-05 | 8-Mar      | membrane associated ring finger 8              | Multiple_Complex |
| TC2200007816.hg.1    | 4.37  | 4.96  | -1.51 | 2.06E-06 | 1.76E-05 | KLHDC7B    | kelch domain containing 7B                     | Coding           |
| TC0400008284.hg.1    | 5.37  | 4.22  | 2.22  | 2.06E-06 | 1.76E-05 | UBE2D3     | Memczak2013 ANTISENSE, coding, INTERNAL,       | NonCoding        |



|                      |       |       |       |          |          |          |                                                  |                  |
|----------------------|-------|-------|-------|----------|----------|----------|--------------------------------------------------|------------------|
| TC0100008807.hg.1    | 7.13  | 5.69  | 2.71  | 2.07E-06 | 1.76E-05 | NEXN     | nexilin (F actin binding protein)                | Multiple_Complex |
| TC1700010247.hg.1    | 5.16  | 5.96  | -1.73 | 2.07E-06 | 1.77E-05 | ABHD15   | abhydrolase domain containing 15                 | Coding           |
| TC0500011150.hg.1    | 6.23  | 7.25  | -2.02 | 2.08E-06 | 1.77E-05 | GFM2     | G elongation factor, mitochondrial 2             | Multiple_Complex |
| TC0100016470.hg.1    | 7.1   | 7.86  | -1.7  | 2.09E-06 | 1.78E-05 | MRPS14   | mitochondrial ribosomal protein S14              | Multiple_Complex |
| TC1600007425.hg.1    | 5.91  | 6.79  | -1.84 | 2.10E-06 | 1.78E-05 | KIF22    | kinesin family member 22                         | Multiple_Complex |
| TC0300007136.hg.1    | 10.93 | 10.2  | 1.65  | 2.11E-06 | 1.79E-05 | CTNNB1   | catenin (cadherin-associated protein), beta 1    | Multiple_Complex |
| TC0400007264.hg.1    | 12.63 | 13.63 | -2    | 2.11E-06 | 1.79E-05 | KLF3     | Kruppel-like factor 3 (basic)                    | Multiple_Complex |
| TC2200009196.hg.1    | 5.33  | 6.23  | -1.86 | 2.11E-06 | 1.80E-05 | LZTR1    | leucine-zipper-like transcription regulator 1    | Multiple_Complex |
| TC1800009268.hg.1    | 10.47 | 7.63  | 7.18  | 2.11E-06 | 1.80E-05 | DSC2     | desmocollin 2                                    | Multiple_Complex |
| TC1900011752.hg.1    | 5.07  | 6.34  | -2.42 | 2.13E-06 | 1.81E-05 | ZNF223   | zinc finger protein 223                          | Multiple_Complex |
| TC0600011127.hg.1    | 7.08  | 5.99  | 2.13  | 2.14E-06 | 1.82E-05 | HIST1H1C | histone cluster 1, H1c                           | Multiple_Complex |
| TC0100009561.hg.1    | 5.25  | 6.08  | -1.77 | 2.16E-06 | 1.83E-05 | TF2      | transcription termination factor, RNA polymer    | Multiple_Complex |
| TC1100010185.hg.1    | 5.36  | 6.61  | -2.39 | 2.16E-06 | 1.83E-05 | CYP2R1   | cytochrome P450, family 2, subfamily R, poly     | Multiple_Complex |
| TC1700009954.hg.1    | 7.34  | 8.51  | -2.25 | 2.16E-06 | 1.83E-05 | TOM1L2   | target of myb1 like 2 membrane trafficking pr    | Multiple_Complex |
| TC1100008612.hg.1    | 14.46 | 16.53 | -4.19 | 2.16E-06 | 1.83E-05 | RPS28    | ribosomal protein S28                            | Multiple_Complex |
| TC1900012044.hg.1    | 7.27  | 6.12  | 2.22  | 2.18E-06 | 1.85E-05 | GP6      | glycoprotein VI (platelet)                       | Multiple_Complex |
| TC0500007048.hg.1    | 4.92  | 5.82  | -1.87 | 2.19E-06 | 1.86E-05 | C5orf22  | chromosome 5 open reading frame 22               | Multiple_Complex |
| TC0200008501.hg.1    | 6.45  | 7.69  | -2.36 | 2.21E-06 | 1.87E-05 | ITPR1L1  | inositol 1,4,5-trisphosphate receptor interacti  | Coding           |
| TSUnmapped00000128.h | 5.02  | 6.23  | -2.3  | 2.22E-06 | 1.88E-05 | ZNF852   | zinc finger protein 852                          | NonCoding        |
| TC1400009649.hg.1    | 13.45 | 11.83 | 3.07  | 2.23E-06 | 1.89E-05 | NUMB     | numb homolog (Drosophila)                        | Multiple_Complex |
| TC1200006604.hg.1    | 10.82 | 8.56  | 4.78  | 2.23E-06 | 1.89E-05 | CD9      | CD9 molecule                                     | Multiple_Complex |
| TC0700008926.hg.1    | 8.33  | 6.74  | 3.02  | 2.24E-06 | 1.90E-05 | ING3     | inhibitor of growth family member 3              | Multiple_Complex |
| TC0100009939.hg.1    | 7.61  | 8.62  | -2.02 | 2.24E-06 | 1.90E-05 | GABPB2   | GA binding protein transcription factor, beta s  | Multiple_Complex |
| TC1700008028.hg.1    | 8.03  | 8.66  | -1.55 | 2.24E-06 | 1.90E-05 | NMT1     | N-myristoyltransferase 1                         | Multiple_Complex |
| TC0200015214.hg.1    | 4.47  | 6.17  | -3.23 | 2.25E-06 | 1.90E-05 | OSGEPL1  | O-sialoglycoprotein endopeptidase-like 1         | Multiple_Complex |
| TC1100012019.hg.1    | 7.64  | 8.68  | -2.05 | 2.25E-06 | 1.90E-05 | SESN3    | sestrin 3                                        | Multiple_Complex |
| TC0200010838.hg.1    | 5.59  | 4.82  | 1.7   | 2.26E-06 | 1.91E-05 | STK16    | serine/threonine kinase 16                       | Multiple_Complex |
| TC0100009305.hg.1    | 4.81  | 5.59  | -1.72 | 2.27E-06 | 1.92E-05 | PRMT6    | protein arginine methyltransferase 6             | Coding           |
| TC0300008173.hg.1    | 12    | 11.14 | 1.81  | 2.28E-06 | 1.92E-05 | PCNP     | PEST proteolytic signal containing nuclear pro   | Multiple_Complex |
| TC2200006601.hg.1    | 6.48  | 5.11  | 2.58  | 2.28E-06 | 1.92E-05 | MRPL40   | mitochondrial ribosomal protein L40              | Multiple_Complex |
| TC0900011659.hg.1    | 4.17  | 5.17  | -2    | 2.28E-06 | 1.92E-05 | C9orf114 | chromosome 9 open reading frame 114              | Multiple_Complex |
| TC0500013361.hg.1    | 8.85  | 8.04  | 1.75  | 2.31E-06 | 1.94E-05 | SAR1B    | secretion associated, Ras related GTPase 1B      | Multiple_Complex |
| TC0800011061.hg.1    | 9.34  | 8.01  | 2.51  | 2.32E-06 | 1.95E-05 | NBN      | nibrin                                           | Multiple_Complex |
| TSUnmapped00000378.h | 10.5  | 8.06  | 5.42  | 2.32E-06 | 1.96E-05 | PADI4    | peptidyl arginine deiminase, type IV             | Coding           |
| TC0100015947.hg.1    | 18.42 | 17.51 | 1.89  | 2.32E-06 | 1.96E-05 | THBS3    | Salzman2013 ALT_ACCEPTOR, ALT_DONOR, cr          | NonCoding        |
| TC1000007272.hg.1    | 6.92  | 5.63  | 2.45  | 2.32E-06 | 1.96E-05 | CREM     | cAMP responsive element modulator                | Multiple_Complex |
| TC1000012584.hg.1    | 9.44  | 7.81  | 3.08  | 2.33E-06 | 1.96E-05 | ERLIN1   | ER lipid raft associated 1                       | Multiple_Complex |
| TC0900009846.hg.1    | 8.53  | 7.72  | 1.76  | 2.33E-06 | 1.96E-05 | B4GALT1  | UDP-Gal:betaGlcNAc beta 1,4- galactosyltrans     | Multiple_Complex |
| TC1400010778.hg.1    | 5.36  | 6.54  | -2.27 | 2.33E-06 | 1.96E-05 | TRIP11   | thyroid hormone receptor interactor 11           | Multiple_Complex |
| TC1900006978.hg.1    | 6.11  | 5.34  | 1.71  | 2.33E-06 | 1.96E-05 | ICAM4    | intercellular adhesion molecule 4 (Landsteiner   | Multiple_Complex |
| TC1100008398.hg.1    | 5.16  | 6.14  | -1.98 | 2.35E-06 | 1.97E-05 | PAAF1    | proteasomal ATPase-associated factor 1           | Multiple_Complex |
| TC1700010811.hg.1    | 8.82  | 7.54  | 2.42  | 2.36E-06 | 1.98E-05 | HDAC5    | histone deacetylase 5                            | Multiple_Complex |
| TC0800010285.hg.1    | 6.55  | 7.56  | -2.02 | 2.38E-06 | 1.99E-05 | SLC20A2  | solute carrier family 20 (phosphate transporte   | Multiple_Complex |
| TC1800007523.hg.1    | 8.57  | 7.22  | 2.54  | 2.39E-06 | 2.01E-05 | PHLPP1   | PH domain and leucine rich repeat protein ph     | Multiple_Complex |
| TC0200006665.hg.1    | 5.54  | 6.78  | -2.36 | 2.41E-06 | 2.02E-05 | TAF1B    | TATA box binding protein (TBP)-associated fac    | Multiple_Complex |
| TC0100009858.hg.1    | 7.83  | 9.04  | -2.31 | 2.43E-06 | 2.03E-05 | PPIAL4C  | peptidylprolyl isomerase A (cyclophilin A)-like  | Coding           |
| TC2100007467.hg.1    | 7.24  | 8.29  | -2.06 | 2.43E-06 | 2.04E-05 | DIP2A    | disco-interacting protein 2 homolog A            | Multiple_Complex |
| TC1700009730.hg.1    | 6.47  | 5.49  | 1.96  | 2.44E-06 | 2.04E-05 | RCVRN    | recoverin                                        | Multiple_Complex |
| TC0300010949.hg.1    | 15.44 | 9.76  | 51.45 | 2.45E-06 | 2.05E-05 | LTF      | lactotransferrin                                 | Multiple_Complex |
| TC0400010995.hg.1    | 8.76  | 9.83  | -2.1  | 2.48E-06 | 2.08E-05 | ANKRD17  | ankyrin repeat domain 17                         | Multiple_Complex |
| TC1600008991.hg.1    | 6.38  | 7.44  | -2.09 | 2.50E-06 | 2.09E-05 | LMF1     | lipase maturation factor 1                       | Multiple_Complex |
| TC0800008062.hg.1    | 7.69  | 6.68  | 2.01  | 2.51E-06 | 2.10E-05 | ZBTB10   | zinc finger and BTB domain containing 10         | Coding           |
| TC0100018388.hg.1    | 8.68  | 9.7   | -2.02 | 2.52E-06 | 2.11E-05 | SLC35E2B | solute carrier family 35, member E2B             | Multiple_Complex |
| TC0600011145.hg.1    | 10.59 | 9.19  | 2.64  | 2.54E-06 | 2.12E-05 | HIST1H4H | histone cluster 1, H4h                           | Coding           |
| TC1200012735.hg.1    | 8.19  | 7.15  | 2.06  | 2.58E-06 | 2.15E-05 | ZNF26    | zinc finger protein 26                           | NonCoding        |
| TC0500011751.hg.1    | 10.06 | 9.25  | 1.75  | 2.59E-06 | 2.16E-05 | FEM1C    | fem-1 homolog c (C. elegans)                     | Multiple_Complex |
| TC1200006946.hg.1    | 6.05  | 5.26  | 1.73  | 2.59E-06 | 2.16E-05 | H2AFJ    | H2A histone family, member J                     | Multiple_Complex |
| TC1900010748.hg.1    | 7.68  | 8.76  | -2.11 | 2.59E-06 | 2.16E-05 | ATP5SL   | ATP5S-like                                       | Multiple_Complex |
| TC1000008088.hg.1    | 9.83  | 8.63  | 2.3   | 2.61E-06 | 2.17E-05 | SAMD8    | sterile alpha motif domain containing 8          | Multiple_Complex |
| TC0100016431.hg.1    | 7.69  | 6.28  | 2.65  | 2.63E-06 | 2.19E-05 | TNFSF4   | tumor necrosis factor (ligand) superfamily, me   | Multiple_Complex |
| TC0100010193.hg.1    | 8.73  | 9.95  | -2.34 | 2.63E-06 | 2.19E-05 | PRCC     | papillary renal cell carcinoma (translocation-a  | Multiple_Complex |
| TC0800007949.hg.1    | 8.99  | 10.06 | -2.09 | 2.65E-06 | 2.21E-05 | TERF1    | telomeric repeat binding factor (NIMA-interac    | Multiple_Complex |
| TC1100011739.hg.1    | 7.65  | 9     | -2.55 | 2.66E-06 | 2.21E-05 | ALG8     | ALG8, alpha-1,3-glucoyltransferase               | Multiple_Complex |
| TC0200012418.hg.1    | 7.82  | 8.85  | -2.05 | 2.70E-06 | 2.25E-05 | LRPPRC   | leucine-rich pentatricopeptide repeat containi   | Multiple_Complex |
| TC1100011222.hg.1    | 5.65  | 6.51  | -1.81 | 2.70E-06 | 2.25E-05 | SLC25A45 | solute carrier family 25, member 45              | Multiple_Complex |
| TC0600009611.hg.1    | 9.75  | 8.66  | 2.12  | 2.76E-06 | 2.29E-05 | HEBP2    | heme binding protein 2                           | Multiple_Complex |
| TC1500009298.hg.1    | 5.04  | 5.92  | -1.84 | 2.76E-06 | 2.30E-05 | SLC30A4  | solute carrier family 30 (zinc transporter), mer | Multiple_Complex |
| TC0800008145.hg.1    | 8.67  | 9.68  | -2.02 | 2.79E-06 | 2.32E-05 | WWP1     | WW domain containing E3 ubiquitin protein li     | Multiple_Complex |
| TC0200011919.hg.1    | 5.98  | 7.21  | -2.35 | 2.79E-06 | 2.32E-05 | LDAH     | lipid droplet associated hydrolase               | Multiple_Complex |
| TC0100008797.hg.1    | 5.5   | 7.01  | -2.86 | 2.80E-06 | 2.32E-05 | AK5      | adenylate kinase 5                               | Multiple_Complex |

|                      |       |       |        |          |          |            |                                                    |                  |
|----------------------|-------|-------|--------|----------|----------|------------|----------------------------------------------------|------------------|
| TC2100008562.hg.1    | 12.34 | 13.52 | -2.27  | 2.81E-06 | 2.33E-05 | RUNX1      | runt-related transcription factor 1                | Multiple_Complex |
| TC2200008370.hg.1    | 9.17  | 10.04 | -1.83  | 2.82E-06 | 2.34E-05 | XBP1       | X-box binding protein 1                            | Multiple_Complex |
| TC1700010814.hg.1    | 6.81  | 8.33  | -2.86  | 2.83E-06 | 2.34E-05 | ASB16-AS1  | ASB16 antisense RNA 1                              | Multiple_Complex |
| TC0100017241.hg.1    | 5.3   | 6.08  | -1.72  | 2.84E-06 | 2.35E-05 | TMEM206    | transmembrane protein 206                          | Multiple_Complex |
| TC1600010175.hg.1    | 6.97  | 5.67  | 2.47   | 2.84E-06 | 2.35E-05 | C16orf87   | chromosome 16 open reading frame 87                | Multiple_Complex |
| TC0400010626.hg.1    | 8.19  | 9.18  | -1.98  | 2.85E-06 | 2.36E-05 | FRYL       | FRY like transcription coactivator                 | Multiple_Complex |
| TC0100011384.hg.1    | 11.86 | 10.52 | 2.53   | 2.85E-06 | 2.36E-05 | MAPKAPK2   | mitogen-activated protein kinase-activated pr      | Multiple_Complex |
| TC1200010984.hg.1    | 9.86  | 11.16 | -2.47  | 2.89E-06 | 2.39E-05 | CTDSP2     | CTD small phosphatase 2                            | Multiple_Complex |
| TC1900008279.hg.1    | 10.34 | 8.89  | 2.74   | 2.90E-06 | 2.40E-05 | BCL3; MIR8 | B-cell CLL/lymphoma 3; microRNA 8085               | Multiple_Complex |
| TC0500013217.hg.1    | 6.63  | 7.53  | -1.86  | 2.91E-06 | 2.41E-05 | COMMD10    | COMM domain containing 10                          | Multiple_Complex |
| TC2200009282.hg.1    | 6.78  | 7.83  | -2.08  | 2.93E-06 | 2.42E-05 | SAMM50     | SAMM50 sorting and assembly machinery cor          | Multiple_Complex |
| TC0100016786.hg.1    | 9.93  | 11.07 | -2.2   | 2.93E-06 | 2.42E-05 | UCHL5      | ubiquitin C-terminal hydrolase L5                  | Multiple_Complex |
| TC0500012486.hg.1    | 11.47 | 10.55 | 1.9    | 2.94E-06 | 2.43E-05 | DCTN4      | dynactin 4 (p62)                                   | Multiple_Complex |
| TC0300013796.hg.1    | 6.2   | 6.98  | -1.72  | 2.96E-06 | 2.45E-05 | OXNAD1     | oxidoreductase NAD-binding domain containi         | NonCoding        |
| TC1000010249.hg.1    | 11.75 | 11.06 | 1.6    | 2.97E-06 | 2.45E-05 | KIF5B      | kinesin family member 5B                           | Multiple_Complex |
| TC1200009892.hg.1    | 6.63  | 5.34  | 2.45   | 2.98E-06 | 2.46E-05 | OLR1       | oxidized low density lipoprotein (lectin-like) r   | Multiple_Complex |
| TC0400008388.hg.1    | 6.74  | 7.94  | -2.3   | 2.98E-06 | 2.46E-05 | GAR1       | GAR1 homolog, ribonucleoprotein                    | Multiple_Complex |
| TC0X00011173.hg.1    | 10.65 | 12.07 | -2.67  | 3.00E-06 | 2.47E-05 | IDH3G      | isocitrate dehydrogenase 3 (NAD+) gamma            | Multiple_Complex |
| TC0200012429.hg.1    | 8.57  | 5.96  | 6.11   | 3.02E-06 | 2.49E-05 | PPM1B      | Memczak2013 ANTISENSE, coding, INTERNAL, NonCoding | NonCoding        |
| TSUnmapped00000275.h | 5.24  | 4.43  | 1.75   | 3.03E-06 | 2.50E-05 | NDUFA6     | NADH dehydrogenase (ubiquinone) 1 alpha su         | Coding           |
| TC1900007844.hg.1    | 4.36  | 5.29  | -1.9   | 3.03E-06 | 2.50E-05 | LSR        | lipolysis stimulated lipoprotein receptor          | Multiple_Complex |
| TC1600010475.hg.1    | 8.09  | 9.35  | -2.39  | 3.07E-06 | 2.53E-05 | CFAP20     | cilia and flagella associated protein 20           | Multiple_Complex |
| TC0200014893.hg.1    | 10.34 | 9.12  | 2.33   | 3.08E-06 | 2.53E-05 | TLK1       | tousled-like kinase 1                              | Multiple_Complex |
| TC0300007055.hg.1    | 8.52  | 6.21  | 4.96   | 3.08E-06 | 2.53E-05 | CTDSPL     | CTD small phosphatase like                         | Multiple_Complex |
| TC2000008852.hg.1    | 9.69  | 10.72 | -2.05  | 3.12E-06 | 2.56E-05 | NOL4L      | nucleolar protein 4-like                           | Multiple_Complex |
| TC0100007634.hg.1    | 7.53  | 5.92  | 3.04   | 3.18E-06 | 2.61E-05 | ZCCHC17    | zinc finger, CCHC domain containing 17             | Multiple_Complex |
| TC1800006589.hg.1    | 6.34  | 8.24  | -3.72  | 3.18E-06 | 2.61E-05 | PTPRM      | protein tyrosine phosphatase, receptor type, I     | Multiple_Complex |
| TC1000007396.hg.1    | 5.3   | 6.54  | -2.36  | 3.18E-06 | 2.61E-05 | BMS1       | BMS1 ribosome biogenesis factor                    | Multiple_Complex |
| TC0800011372.hg.1    | 8.15  | 9.23  | -2.11  | 3.20E-06 | 2.62E-05 | SLC25A32   | solute carrier family 25 (mitochondrial folate r   | Multiple_Complex |
| TSUnmapped00000250.h | 4.85  | 4.15  | 1.62   | 3.20E-06 | 2.63E-05 | ZDHC3      | zinc finger, DHHC-type containing 3                | NonCoding        |
| TC1300008819.hg.1    | 16.74 | 13.74 | 8      | 3.20E-06 | 2.63E-05 | TPT1; SNO1 | tumor protein, translationally-controlled 1; sn    | Multiple_Complex |
| TC1200008921.hg.1    | 7.14  | 12.13 | -31.69 | 3.23E-06 | 2.65E-05 | OAS2       | 2-5-oligoadenylate synthetase 2                    | Multiple_Complex |
| TC1200009913.hg.1    | 12.14 | 15.27 | -8.77  | 3.24E-06 | 2.66E-05 | YBX3       | Y box binding protein 3                            | Multiple_Complex |
| TSUnmapped00000471.h | 6.51  | 5.57  | 1.93   | 3.25E-06 | 2.66E-05 | TRAPPC4    | trafficking protein particle complex 4             | Coding           |
| TC0100007765.hg.1    | 7.35  | 8.35  | -2.01  | 3.26E-06 | 2.67E-05 | ZMYM4      | zinc finger, MYM-type 4                            | Multiple_Complex |
| TC2000009198.hg.1    | 4.27  | 5.17  | -1.87  | 3.26E-06 | 2.67E-05 | ADA        | adenosine deaminase                                | Multiple_Complex |
| TC1700011731.hg.1    | 9.64  | 8.28  | 2.57   | 3.27E-06 | 2.68E-05 | ATP5H      | ATP synthase, H+ transporting, mitochondrial       | Multiple_Complex |
| TC0300011997.hg.1    | 5.53  | 6.59  | -2.09  | 3.27E-06 | 2.68E-05 | BTLA       | B and T lymphocyte associated                      | Multiple_Complex |
| TC1300009639.hg.1    | 6.48  | 7.36  | -1.84  | 3.28E-06 | 2.68E-05 | TMTC4      | transmembrane and tetra-ricopeptide repeat         | Multiple_Complex |
| TC0100008564.hg.1    | 6.39  | 7.28  | -1.85  | 3.29E-06 | 2.69E-05 | ATG4C      | autophagy related 4C, cysteine peptidase           | Multiple_Complex |
| TC1900011909.hg.1    | 9.98  | 11.54 | -2.94  | 3.29E-06 | 2.69E-05 | COPE       | coatamer protein complex subunit epsilon           | Multiple_Complex |
| TC0200007115.hg.1    | 7.68  | 8.81  | -2.19  | 3.30E-06 | 2.69E-05 | CLIP4      | CAP-GLY domain containing linker protein farr      | Multiple_Complex |
| TC0300012027.hg.1    | 10.76 | 9.75  | 2      | 3.32E-06 | 2.71E-05 | USF3       | upstream transcription factor family member        | Multiple_Complex |
| TC0100010244.hg.1    | 12.12 | 15.14 | -8.08  | 3.33E-06 | 2.72E-05 | IFI16      | interferon, gamma-inducible protein 16             | Multiple_Complex |
| TC0300010413.hg.1    | 8.98  | 7.97  | 2.01   | 3.33E-06 | 2.72E-05 | ANKRD28    | ankyrin repeat domain 28                           | Multiple_Complex |
| TC1900009176.hg.1    | 7.78  | 9.08  | -2.47  | 3.34E-06 | 2.72E-05 | TCF3       | transcription factor 3                             | Multiple_Complex |
| TC1700009495.hg.1    | 9.26  | 7.78  | 2.8    | 3.36E-06 | 2.74E-05 | P2RX1      | purinergic receptor P2X, ligand gated ion char     | Multiple_Complex |
| TC0200012404.hg.1    | 14.32 | 15.44 | -2.19  | 3.40E-06 | 2.77E-05 | ZFP36L2    | ZFP36 ring finger protein-like 2                   | Multiple_Complex |
| TC0600007664.hg.1    | 6.52  | 7.78  | -2.4   | 3.40E-06 | 2.77E-05 | HLA-DQA2   | major histocompatibility complex, class II, DQ     | Coding           |
| TC0800011007.hg.1    | 5.31  | 4.21  | 2.15   | 3.40E-06 | 2.77E-05 | REXO1L4P   | REX1, RNA exonuclease 1 homolog-like 4, pse        | Multiple_Complex |
| TC0300009224.hg.1    | 5.2   | 4.37  | 1.77   | 3.41E-06 | 2.77E-05 | P2RY1      | purinergic receptor P2Y, G-protein coupled, 1      | Multiple_Complex |
| TC0500008582.hg.1    | 7.43  | 8.21  | -1.71  | 3.42E-06 | 2.78E-05 | ISOC1      | isochorismatase domain containing 1                | Multiple_Complex |
| TC1900011318.hg.1    | 5.52  | 6.3   | -1.72  | 3.45E-06 | 2.80E-05 | ZNF888     | zinc finger protein 888                            | Multiple_Complex |
| TC0200016787.hg.1    | 7.49  | 8.31  | -1.76  | 3.45E-06 | 2.81E-05 | NDUFA10    | NADH dehydrogenase (ubiquinone) 1 alpha su         | Multiple_Complex |
| TC0400010770.hg.1    | 6.15  | 7.13  | -1.97  | 3.46E-06 | 2.81E-05 | PPAT       | phosphoribosyl pyrophosphate amidotransfer         | Multiple_Complex |
| TC1200009740.hg.1    | 6.75  | 7.78  | -2.03  | 3.49E-06 | 2.84E-05 | IFFO1      | intermediate filament family orphan 1              | Multiple_Complex |
| TC0500009678.hg.1    | 5.58  | 6.59  | -2.02  | 3.50E-06 | 2.84E-05 | ZNF354C    | zinc finger protein 354C                           | Coding           |
| TC0100010661.hg.1    | 5.72  | 6.79  | -2.1   | 3.51E-06 | 2.85E-05 | DARS2      | aspartyl-tRNA synthetase 2, mitochondrial          | Multiple_Complex |
| TC1000011553.hg.1    | 6.14  | 7.33  | -2.28  | 3.52E-06 | 2.85E-05 | MMS19      | MMS19 homolog, cytosolic iron-sulfur assem         | Multiple_Complex |
| TC0900011423.hg.1    | 4.85  | 5.96  | -2.16  | 3.52E-06 | 2.86E-05 | TLL11      | tubulin tyrosine ligase-like family member 11      | Multiple_Complex |
| TC1900011627.hg.1    | 3.75  | 4.82  | -2.1   | 3.54E-06 | 2.87E-05 | ZNF132     | zinc finger protein 132                            | Multiple_Complex |
| TC1400009834.hg.1    | 8.03  | 9.34  | -2.48  | 3.54E-06 | 2.87E-05 | GTF2A1     | general transcription factor IIA 1                 | Multiple_Complex |
| TC1700006774.hg.1    | 6.37  | 5.38  | 1.99   | 3.55E-06 | 2.87E-05 | CYB5D1     | cytochrome b5 domain containing 1                  | Multiple_Complex |
| TC0300013609.hg.1    | 7.64  | 8.65  | -2     | 3.57E-06 | 2.89E-05 | LSG1       | large 60S subunit nuclear export GTPase 1          | Multiple_Complex |
| TC2200006899.hg.1    | 11.3  | 10.45 | 1.8    | 3.57E-06 | 2.89E-05 | XRN2       | 5-3 exoribonuclease 2                              | Multiple_Complex |
| TC0100018568.hg.1    | 11.02 | 9.64  | 2.59   | 3.59E-06 | 2.91E-05 | ARID4B     | AT rich interactive domain 4B (RBP1-like)          | Multiple_Complex |
| TC1400008749.hg.1    | 7.3   | 8.46  | -2.24  | 3.61E-06 | 2.92E-05 | RABGGTA    | Rab geranylgeranyltransferase, alpha subunit       | Multiple_Complex |
| TC0200010582.hg.1    | 4.7   | 6     | -2.46  | 3.62E-06 | 2.93E-05 | FASTKD2    | FAST kinase domains 2                              | Multiple_Complex |
| TC1200010795.hg.1    | 4.13  | 5.04  | -1.88  | 3.62E-06 | 2.93E-05 | RARG       | retinoic acid receptor, gamma                      | Multiple_Complex |
| TC0300013019.hg.1    | 4.59  | 3.55  | 2.05   | 3.62E-06 | 2.93E-05 | SI         | sucrase-isomaltase (alpha-glucosidase)             | Multiple_Complex |

|                      |       |       |       |          |          |                           |                                                  |                  |
|----------------------|-------|-------|-------|----------|----------|---------------------------|--------------------------------------------------|------------------|
| TC0300013270.hg.1    | 7.4   | 6.34  | 2.09  | 3.63E-06 | 2.93E-05 | MRPL47                    | mitochondrial ribosomal protein L47              | Multiple_Complex |
| TC0100008103.hg.1    | 11.48 | 9.58  | 3.72  | 3.64E-06 | 2.94E-05 | RPS8; SNOF                | ribosomal protein S8; small nucleolar RNA, C/    | Multiple_Complex |
| TC0300007194.hg.1    | 9.02  | 7.64  | 2.59  | 3.64E-06 | 2.94E-05 | ABHD5                     | abhydrolase domain containing 5                  | Multiple_Complex |
| TC0900011803.hg.1    | 10.45 | 11.24 | -1.74 | 3.64E-06 | 2.94E-05 | SETX                      | senataxin                                        | Multiple_Complex |
| TC1800006635.hg.1    | 8.59  | 7.6   | 1.99  | 3.67E-06 | 2.96E-05 | TWSG1                     | twisted gastrulation BMP signaling modulator     | Multiple_Complex |
| TC1000008529.hg.1    | 6.04  | 7.11  | -2.1  | 3.69E-06 | 2.98E-05 | CCNJ                      | cyclin J                                         | Multiple_Complex |
| TC0400007556.hg.1    | 7.19  | 7.92  | -1.65 | 3.70E-06 | 2.98E-05 | SRD5A3                    | steroid 5 alpha-reductase 3                      | Multiple_Complex |
| TC0100018562.hg.1    | 8.88  | 9.85  | -1.96 | 3.73E-06 | 3.00E-05 | AIDA                      | axin interactor, dorsalization associated        | Multiple_Complex |
| TC0200007261.hg.1    | 14.21 | 11.9  | 4.96  | 3.75E-06 | 3.02E-05 | QPCT                      | glutaminy-peptide cyclotransferase               | Multiple_Complex |
| TC1400009065.hg.1    | 7.49  | 6.32  | 2.25  | 3.75E-06 | 3.02E-05 | FKBP3                     | FK506 binding protein 3                          | Multiple_Complex |
| TC1800008965.hg.1    | 8.29  | 9.35  | -2.08 | 3.77E-06 | 3.03E-05 | TMX3                      | thioredoxin-related transmembrane protein 3      | Multiple_Complex |
| TC0100015558.hg.1    | 6.6   | 7.62  | -2.02 | 3.79E-06 | 3.05E-05 | PPIAL4E                   | peptidylprolyl isomerase A (cyclophilin A)-like  | Coding           |
| TC0400009856.hg.1    | 7.36  | 8.56  | -2.3  | 3.79E-06 | 3.05E-05 | LYAR                      | Ly1 antibody reactive                            | Multiple_Complex |
| TSUnmapped00000661.h | 10.43 | 11.21 | -1.72 | 3.80E-06 | 3.05E-05 | INPP5D                    | inositol polyphosphate-5-phosphatase D           | Coding           |
| TC0200011014.hg.1    | 10.41 | 9.5   | 1.88  | 3.81E-06 | 3.06E-05 | FBXO36                    | Transcript Identified by AceView, Entrez Gene    | Unassigned       |
| TC1500009797.hg.1    | 10.26 | 10.88 | -1.54 | 3.83E-06 | 3.08E-05 | DPP8                      | dipeptidyl-peptidase 8                           | Multiple_Complex |
| TC0500012094.hg.1    | 5.71  | 5.08  | 1.55  | 3.84E-06 | 3.09E-05 | C5orf66-AS                | C5orf66 antisense RNA 1                          | Multiple_Complex |
| TC2200008181.hg.1    | 5.62  | 6.33  | -1.63 | 3.85E-06 | 3.09E-05 | ZNF70                     | zinc finger protein 70                           | Multiple_Complex |
| TC2000009848.hg.1    | 5.79  | 6.55  | -1.68 | 3.87E-06 | 3.10E-05 | UCKL1; MIF                | uridine-cytidine kinase 1-like 1; microRNA 191   | Multiple_Complex |
| TC1800009286.hg.1    | 13.8  | 9.6   | 18.4  | 3.90E-06 | 3.13E-05 | RPL17-C18; RPL17-C18orf32 | readthrough                                      | Coding           |
| TC0500007915.hg.1    | 6.22  | 5.14  | 2.13  | 3.98E-06 | 3.19E-05 | FAM151B                   | family with sequence similarity 151, member      | Multiple_Complex |
| TC0200016018.hg.1    | 9.35  | 10.38 | -2.04 | 4.00E-06 | 3.21E-05 | NCL                       | nucleolin                                        | Multiple_Complex |
| TSUnmapped00000399.h | 5.87  | 6.85  | -1.97 | 4.01E-06 | 3.21E-05 | ZNF852                    | zinc finger protein 852                          | Coding           |
| TC0300013888.hg.1    | 10.9  | 9.94  | 1.95  | 4.01E-06 | 3.21E-05 | TSC22D2                   | TSC22 domain family, member 2                    | Multiple_Complex |
| TC0100018080.hg.1    | 11.28 | 10.13 | 2.23  | 4.02E-06 | 3.22E-05 | AHCTF1                    | AT hook containing transcription factor 1        | Multiple_Complex |
| TC0300014063.hg.1    | 6.23  | 5.48  | 1.68  | 4.04E-06 | 3.24E-05 | ANKUB1                    | ankyrin repeat and ubiquitin domain containin    | NonCoding        |
| TC1500009865.hg.1    | 14.05 | 12.72 | 2.51  | 4.06E-06 | 3.25E-05 | ANP32A                    | acidic nuclear phosphoprotein 32 family mem      | Multiple_Complex |
| TC1900009603.hg.1    | 3.98  | 4.57  | -1.51 | 4.10E-06 | 3.28E-05 | OLFM2                     | olfactomedin 2                                   | Multiple_Complex |
| TC0300009147.hg.1    | 15.58 | 14.2  | 2.59  | 4.11E-06 | 3.28E-05 | RNF13                     | ring finger protein 13                           | Multiple_Complex |
| TC0100015895.hg.1    | 7.22  | 6.27  | 1.92  | 4.12E-06 | 3.29E-05 | RAB13                     | RAB13, member RAS oncogene family                | Multiple_Complex |
| TC0100015254.hg.1    | 5.48  | 6.76  | -2.43 | 4.13E-06 | 3.30E-05 | LRIF1                     | ligand dependent nuclear receptor interacting    | Multiple_Complex |
| TC0800008510.hg.1    | 6.91  | 8.05  | -2.2  | 4.14E-06 | 3.31E-05 | OXR1                      | oxidation resistance 1                           | Multiple_Complex |
| TC0700013442.hg.1    | 7.52  | 6.1   | 2.67  | 4.16E-06 | 3.32E-05 | LSMEM1                    | leucine-rich single-pass membrane protein 1      | Multiple_Complex |
| TC1400007860.hg.1    | 3.91  | 3.39  | 1.43  | 4.18E-06 | 3.33E-05 | FLRT2                     | fibronectin leucine rich transmembrane prote     | Multiple_Complex |
| TC1200011971.hg.1    | 11.92 | 8.95  | 7.83  | 4.18E-06 | 3.33E-05 | RPL6                      | ribosomal protein L6                             | Multiple_Complex |
| TC0500009059.hg.1    | 6.89  | 8.03  | -2.22 | 4.19E-06 | 3.34E-05 | GRPEL2                    | GrpE-like 2, mitochondrial (E. coli)             | Multiple_Complex |
| TC0100007412.hg.1    | 4.54  | 5.85  | -2.47 | 4.20E-06 | 3.35E-05 | MAN1C1                    | mannosidase, alpha, class 1C, member 1           | Multiple_Complex |
| TC1900008907.hg.1    | 19.07 | 19.57 | -1.42 | 4.22E-06 | 3.36E-05 | RPL28; MIR                | ribosomal protein L28; microRNA 6805             | Multiple_Complex |
| TC1200010702.hg.1    | 5.59  | 6.66  | -2.11 | 4.25E-06 | 3.39E-05 | SMAGP                     | small cell adhesion glycoprotein                 | Multiple_Complex |
| TC1700010699.hg.1    | 9.48  | 8.57  | 1.89  | 4.29E-06 | 3.42E-05 | DNAJC7                    | DnaJ (Hsp40) homolog, subfamily C, member        | Multiple_Complex |
| TC0200016757.hg.1    | 7.25  | 6.15  | 2.14  | 4.30E-06 | 3.42E-05 | NCKAP1                    | NCK-associated protein 1                         | Multiple_Complex |
| TC1800008776.hg.1    | 7.12  | 9.09  | -3.91 | 4.33E-06 | 3.44E-05 | FECH                      | ferrochelataase                                  | Multiple_Complex |
| TC1700012198.hg.1    | 5.51  | 6.6   | -2.12 | 4.33E-06 | 3.44E-05 | PIGL                      | phosphatidylinositol glycan anchor biosynthes    | Multiple_Complex |
| TC0100016290.hg.1    | 5.33  | 6.21  | -1.84 | 4.33E-06 | 3.44E-05 | TADA1                     | transcriptional adaptor 1                        | Multiple_Complex |
| TC0600011927.hg.1    | 5.74  | 6.92  | -2.26 | 4.35E-06 | 3.46E-05 | SUPT3H                    | SPT3 homolog, SAGA and STAGA complex corr        | Multiple_Complex |
| TC1700008888.hg.1    | 7.44  | 8.43  | -1.98 | 4.36E-06 | 3.46E-05 | ARMC7                     | armadillo repeat containing 7                    | Multiple_Complex |
| TC2000009956.hg.1    | 8.28  | 9.38  | -2.14 | 4.37E-06 | 3.47E-05 | PCMTD2                    | protein-L-isoaspartate (D-aspartate) O-methyl    | Multiple_Complex |
| TC1900010009.hg.1    | 9.69  | 7.96  | 3.31  | 4.38E-06 | 3.48E-05 | JUND                      | jun D proto-oncogene                             | Coding           |
| TC0600006808.hg.1    | 5.84  | 6.73  | -1.86 | 4.40E-06 | 3.49E-05 | FARS2                     | phenylalanyl-tRNA synthetase 2, mitochondri      | Multiple_Complex |
| TC1000011588.hg.1    | 7.62  | 6.85  | 1.71  | 4.40E-06 | 3.49E-05 | SLC25A28                  | solute carrier family 25 (mitochondrial iron tra | Multiple_Complex |
| TC0700010947.hg.1    | 6.65  | 7.68  | -2.04 | 4.41E-06 | 3.49E-05 | TBRG4; SN(                | transforming growth factor beta regulator 4; s   | Multiple_Complex |
| TC0800008179.hg.1    | 12.1  | 10.63 | 2.75  | 4.45E-06 | 3.53E-05 | RIPK2                     | receptor-interacting serine-threonine kinase 2   | Multiple_Complex |
| TC1700010563.hg.1    | 6.15  | 7.04  | -1.85 | 4.46E-06 | 3.53E-05 | CACNB1                    | calcium channel, voltage-dependent, beta 1 st    | Multiple_Complex |
| TC2200007677.hg.1    | 7.73  | 8.9   | -2.24 | 4.46E-06 | 3.53E-05 | TBC1D22A                  | TBC1 domain family, member 22A                   | Multiple_Complex |
| TC1100008385.hg.1    | 9.64  | 8.47  | 2.25  | 4.46E-06 | 3.53E-05 | RELT                      | RELT tumor necrosis factor receptor              | Multiple_Complex |
| TC0600011646.hg.1    | 8.87  | 6.78  | 4.26  | 4.48E-06 | 3.54E-05 | SLC26A8                   | solute carrier family 26 (anion exchanger), me   | Multiple_Complex |
| TC1400010703.hg.1    | 6.81  | 7.76  | -1.93 | 4.50E-06 | 3.56E-05 | MTA1                      | metastasis associated 1                          | Multiple_Complex |
| TC1100009521.hg.1    | 15.42 | 13.73 | 3.22  | 4.53E-06 | 3.58E-05 | APLP2                     | amyloid beta (A4) precursor-like protein 2       | Multiple_Complex |
| TC2000009292.hg.1    | 9.95  | 11    | -2.07 | 4.54E-06 | 3.59E-05 | ZMYND8                    | zinc finger, MYND-type containing 8              | Multiple_Complex |
| TC0300013051.hg.1    | 11.79 | 9.85  | 3.85  | 4.54E-06 | 3.59E-05 | PDCD10                    | programmed cell death 10                         | Multiple_Complex |
| TC0700010687.hg.1    | 10.27 | 9.18  | 2.13  | 4.56E-06 | 3.60E-05 | KBTBD2                    | kelch repeat and BTB (POZ) domain containin      | Multiple_Complex |
| TC0300009677.hg.1    | 7     | 7.92  | -1.9  | 4.60E-06 | 3.63E-05 | YEATS2                    | YEATS domain containing 2                        | Multiple_Complex |
| TC1200008734.hg.1    | 6.43  | 7.4   | -1.95 | 4.60E-06 | 3.63E-05 | RIC8B                     | RIC8 guanine nucleotide exchange factor B        | Multiple_Complex |
| TC0700010081.hg.1    | 6.61  | 7.43  | -1.77 | 4.60E-06 | 3.63E-05 | CARD11                    | caspase recruitment domain family, member        | Multiple_Complex |
| TC1600008137.hg.1    | 5.72  | 6.52  | -1.74 | 4.61E-06 | 3.64E-05 | CES3; CES2                | carboxylesterase 3; carboxylesterase 2           | Multiple_Complex |
| TC1600007113.hg.1    | 8.69  | 9.82  | -2.19 | 4.68E-06 | 3.69E-05 | C16orf62                  | chromosome 16 open reading frame 62              | Multiple_Complex |
| TSUnmapped00000293.h | 8.85  | 10.2  | -2.55 | 4.68E-06 | 3.69E-05 | RCC2                      | regulator of chromosome condensation 2           | NonCoding        |
| TC1700009260.hg.1    | 8.64  | 9.65  | -2.02 | 4.68E-06 | 3.69E-05 | FOXP2                     | forkhead box K2                                  | Multiple_Complex |
| TC0200016464.hg.1    | 7.14  | 5.74  | 2.64  | 4.69E-06 | 3.70E-05 | APLF                      | apratatin and PNKP like factor                   | Multiple_Complex |
| TC0600007650.hg.1    | 13    | 15.8  | -6.97 | 4.70E-06 | 3.70E-05 | HLA-DRA                   | major histocompatibility complex, class II, DR   | Coding           |

|                      |       |       |       |          |          |              |                                                   |                  |
|----------------------|-------|-------|-------|----------|----------|--------------|---------------------------------------------------|------------------|
| TC1400008913.hg.1    | 11.27 | 10.13 | 2.19  | 4.70E-06 | 3.70E-05 | SNX6         | sorting nexin 6                                   | Multiple_Complex |
| TC0600010867.hg.1    | 8.91  | 7.95  | 1.95  | 4.72E-06 | 3.71E-05 | MCUR1        | mitochondrial calcium uniporter regulator 1       | Multiple_Complex |
| TC0100009428.hg.1    | 6.62  | 7.39  | -1.72 | 4.77E-06 | 3.75E-05 | DDX20        | DEAD (Asp-Glu-Ala-Asp) box polypeptide 20         | Multiple_Complex |
| TC0300008331.hg.1    | 3.89  | 4.8   | -1.87 | 4.77E-06 | 3.75E-05 | ABHD10       | abhydrolase domain containing 10                  | Multiple_Complex |
| TC0100011721.hg.1    | 12.32 | 13.66 | -2.53 | 4.80E-06 | 3.77E-05 | CAPN2        | calpain 2, (m/II) large subunit                   | Multiple_Complex |
| TC1100006491.hg.1    | 12.56 | 14.71 | -4.43 | 4.81E-06 | 3.78E-05 | RPLP2; SNC   | ribosomal protein, large, P2; small nucleolar R   | Multiple_Complex |
| TC0900007457.hg.1    | 9.09  | 6.35  | 6.66  | 4.84E-06 | 3.80E-05 | CNTNAP3P     | contactin associated protein-like 3 pseudogen     | Multiple_Complex |
| TSUnmapped00000705.h | 10.06 | 8.57  | 2.8   | 4.88E-06 | 3.83E-05 | RPS25        | ribosomal protein S25                             | NonCoding        |
| TC0700013343.hg.1    | 9.55  | 10.43 | -1.84 | 4.89E-06 | 3.84E-05 | ZNRF2        | zinc and ring finger 2, E3 ubiquitin protein liga | Multiple_Complex |
| TC1100007728.hg.1    | 10.28 | 11.56 | -2.43 | 4.90E-06 | 3.85E-05 | FAM111A      | family with sequence similarity 111, member .     | Multiple_Complex |
| TC0600011770.hg.1    | 9.12  | 7.07  | 4.15  | 4.90E-06 | 3.85E-05 | TREML1       | triggering receptor expressed on myeloid cells    | Multiple_Complex |
| TC1600007985.hg.1    | 5     | 3.97  | 2.05  | 4.94E-06 | 3.87E-05 | CETP         | cholesteryl ester transfer protein, plasma        | Multiple_Complex |
| TC0400008882.hg.1    | 10.86 | 9.51  | 2.55  | 4.97E-06 | 3.89E-05 | SMARCA5      | SWI/SNF related, matrix associated, actin depen   | Multiple_Complex |
| TC0300013417.hg.1    | 6.51  | 5.19  | 2.5   | 4.98E-06 | 3.90E-05 | LIPH         | lipase, member H                                  | Multiple_Complex |
| TC0200007353.hg.1    | 11.09 | 12.05 | -1.94 | 5.00E-06 | 3.91E-05 | EML4         | echinoderm microtubule associated protein Iii     | Multiple_Complex |
| TC0100014201.hg.1    | 5.11  | 5.93  | -1.76 | 5.02E-06 | 3.93E-05 | CC2D1B       | coiled-coil and C2 domain containing 1B           | Multiple_Complex |
| TC1100012303.hg.1    | 7.46  | 8.34  | -1.84 | 5.03E-06 | 3.93E-05 | PPP2R1B      | protein phosphatase 2, regulatory subunit A, t    | Multiple_Complex |
| TC0900010311.hg.1    | 6.18  | 5.24  | 1.91  | 5.03E-06 | 3.93E-05 | FAM27E3      | family with sequence similarity 27, member E      | Multiple_Complex |
| TC0500010872.hg.1    | 5.21  | 5.96  | -1.68 | 5.04E-06 | 3.94E-05 | ERCC8        | excision repair cross-complementation group       | Multiple_Complex |
| TC0700013224.hg.1    | 6.57  | 5.61  | 1.94  | 5.06E-06 | 3.95E-05 | LMBR1        | Transcript Identified by AceView, Entrez Gene     | Unassigned       |
| TC1300009933.hg.1    | 9.58  | 10.28 | -1.61 | 5.06E-06 | 3.96E-05 | RASA3        | RAS p21 protein activator 3                       | Multiple_Complex |
| TC0100017788.hg.1    | 5.76  | 6.99  | -2.35 | 5.08E-06 | 3.97E-05 | TARBP1       | TAR (HIV-1) RNA binding protein 1                 | Multiple_Complex |
| TC2000010026.hg.1    | 9.16  | 9.73  | -1.47 | 5.08E-06 | 3.97E-05 | TMEM189      | transmembrane protein 189                         | Multiple_Complex |
| TC1400007478.hg.1    | 6.36  | 7.38  | -2.03 | 5.10E-06 | 3.98E-05 | GPHN         | gephyrin                                          | Multiple_Complex |
| TC0X00009462.hg.1    | 7.25  | 8.28  | -2.04 | 5.10E-06 | 3.98E-05 | CASK         | calcium/calmodulin-dependent serine protein       | Multiple_Complex |
| TC0400012933.hg.1    | 8.07  | 9.88  | -3.51 | 5.11E-06 | 3.98E-05 | NAAA         | N-acylethanolamine acid amidase                   | Multiple_Complex |
| TC0900009579.hg.1    | 6.62  | 8.03  | -2.67 | 5.13E-06 | 4.00E-05 | ZDHHC21      | zinc finger, DHHC-type containing 21              | Multiple_Complex |
| TC0600009783.hg.1    | 4.71  | 5.91  | -2.28 | 5.14E-06 | 4.01E-05 | UST          | uronyl-2-sulfotransferase                         | Multiple_Complex |
| TC1600011345.hg.1    | 5.74  | 6.51  | -1.71 | 5.16E-06 | 4.02E-05 | DNASE1       | deoxyribonuclease I                               | Multiple_Complex |
| TC0600013425.hg.1    | 5.78  | 6.65  | -1.83 | 5.18E-06 | 4.03E-05 | ADAT2        | adenosine deaminase, tRNA-specific 2              | Multiple_Complex |
| TC0X00007158.hg.1    | 4.67  | 5.99  | -2.5  | 5.21E-06 | 4.06E-05 | ZNF81        | zinc finger protein 81                            | Multiple_Complex |
| TC1600010409.hg.1    | 5.17  | 6.63  | -2.75 | 5.23E-06 | 4.07E-05 | BBS2         | Bardet-Biedl syndrome 2                           | Multiple_Complex |
| TC2000009744.hg.1    | 5.08  | 4.3   | 1.71  | 5.23E-06 | 4.07E-05 | LAMAS5; Ml   | laminin, alpha 5; microRNA 4758                   | Multiple_Complex |
| TC2100007816.hg.1    | 5.17  | 4.26  | 1.88  | 5.25E-06 | 4.09E-05 | CYR1         | cysteine/tyrosine-rich 1                          | Coding           |
| TC0700008104.hg.1    | 9.22  | 9.96  | -1.67 | 5.27E-06 | 4.10E-05 | LOC100133    | uncharacterized LOC100133091; Salzman2015         | Multiple_Complex |
| TC0600011912.hg.1    | 10.51 | 9.64  | 1.82  | 5.27E-06 | 4.10E-05 | SLC35B2; N   | solute carrier family 35 (adenosine 3-phospho     | Multiple_Complex |
| TC0X00008526.hg.1    | 6.67  | 6.01  | 1.59  | 5.29E-06 | 4.11E-05 | FHL1         | four and a half LIM domains 1                     | Multiple_Complex |
| TC0400008902.hg.1    | 8.07  | 9.39  | -2.51 | 5.31E-06 | 4.13E-05 | ABCE1        | ATP binding cassette subfamily E member 1         | Multiple_Complex |
| TC0500007691.hg.1    | 9.06  | 10.3  | -2.35 | 5.33E-06 | 4.14E-05 | SMN1; SMT    | survival of motor neuron 1, telomeric; surviva    | Multiple_Complex |
| TC0600008087.hg.1    | 6.36  | 7.18  | -1.77 | 5.33E-06 | 4.14E-05 | ABCC10       | ATP binding cassette subfamily C member 10        | Multiple_Complex |
| TC0500011418.hg.1    | 10.52 | 11.91 | -2.63 | 5.33E-06 | 4.14E-05 | MEF2C        | myocyte enhancer factor 2C                        | Multiple_Complex |
| TC0500012642.hg.1    | 8.37  | 9.36  | -1.99 | 5.35E-06 | 4.14E-05 | RNF145       | ring finger protein 145                           | Multiple_Complex |
| TC0500009422.hg.1    | 10.02 | 7.91  | 4.32  | 5.38E-06 | 4.17E-05 | NPM1         | nucleophosmin (nucleolar phosphoprotein B2        | Multiple_Complex |
| TC0300009194.hg.1    | 5.24  | 4.51  | 1.66  | 5.39E-06 | 4.18E-05 | SUCNR1       | succinate receptor 1                              | Coding           |
| TC0300011525.hg.1    | 9.45  | 8.11  | 2.53  | 5.41E-06 | 4.19E-05 | RYBP         | RING1 and YY1 binding protein                     | Multiple_Complex |
| TC0100011374.hg.1    | 7.73  | 8.61  | -1.84 | 5.44E-06 | 4.21E-05 | IKBKE        | inhibitor of kappa light polypeptide gene enh     | Multiple_Complex |
| TC1000006816.hg.1    | 7.88  | 9.03  | -2.23 | 5.45E-06 | 4.22E-05 | OPTN         | optineurin                                        | Multiple_Complex |
| TC1500009089.hg.1    | 11.26 | 10.41 | 1.8   | 5.46E-06 | 4.23E-05 | PLCB2        | phospholipase C, beta 2                           | Multiple_Complex |
| TC1900006932.hg.1    | 6.21  | 7.25  | -2.06 | 5.52E-06 | 4.27E-05 | ZNF559-ZNF   | ZNF559-ZNF177 readthrough; zinc finger prot       | Multiple_Complex |
| TC0X00008481.hg.1    | 6.94  | 8.33  | -2.61 | 5.57E-06 | 4.31E-05 | FAM122C      | family with sequence similarity 122C              | Multiple_Complex |
| TC0100013969.hg.1    | 6.48  | 7.32  | -1.79 | 5.58E-06 | 4.31E-05 | ERI3; ER13-I | ER1 exoribonuclease family member 3; ER13 i       | Multiple_Complex |
| TC0900007029.hg.1    | 12.4  | 11.1  | 2.47  | 5.59E-06 | 4.32E-05 | UBAP1        | ubiquitin associated protein 1                    | Multiple_Complex |
| TC1200008488.hg.1    | 15.58 | 13.7  | 3.68  | 5.61E-06 | 4.33E-05 | PLXNC1       | plexin C1                                         | Multiple_Complex |
| TC1400007584.hg.1    | 5.04  | 7.03  | -4    | 5.62E-06 | 4.34E-05 | TTC9         | tetratricopeptide repeat domain 9                 | Coding           |
| TC0100007690.hg.1    | 8.14  | 8.85  | -1.64 | 5.63E-06 | 4.34E-05 | RBBP4        | retinoblastoma binding protein 4                  | Multiple_Complex |
| TC1000012505.hg.1    | 4.27  | 5.38  | -2.15 | 5.70E-06 | 4.39E-05 | LHPP         | phospholysine phosphohistidine inorganic pyr      | Multiple_Complex |
| TC0900008515.hg.1    | 10.29 | 8.83  | 2.74  | 5.72E-06 | 4.41E-05 | ATP6V1G1     | ATPase, H+ transporting, lysosomal 13kDa, V1      | Multiple_Complex |
| TC1100009234.hg.1    | 7.76  | 6.71  | 2.07  | 5.76E-06 | 4.44E-05 | TRAPPC4; T   | trafficking protein particle complex 4; microRf   | Multiple_Complex |
| TC2200009187.hg.1    | 7.8   | 6.75  | 2.08  | 5.76E-06 | 4.44E-05 | TUBA8        | tubulin, alpha 8                                  | Multiple_Complex |
| TC0X00007134.hg.1    | 7.73  | 8.71  | -1.98 | 5.85E-06 | 4.51E-05 | USP11        | ubiquitin specific peptidase 11                   | Multiple_Complex |
| TC1900010221.hg.1    | 6.44  | 7.42  | -1.97 | 5.91E-06 | 4.55E-05 | ZNF681       | zinc finger protein 681                           | Multiple_Complex |
| TC0200016699.hg.1    | 6.13  | 7.52  | -2.61 | 5.91E-06 | 4.55E-05 | TRABD2A      | TraB domain containing 2A                         | Multiple_Complex |
| TC1400010636.hg.1    | 7.91  | 6.65  | 2.39  | 5.96E-06 | 4.59E-05 | SLIRP        | SRA stem-loop interacting RNA binding protei      | Multiple_Complex |
| TC1700009939.hg.1    | 4.31  | 4.94  | -1.55 | 5.96E-06 | 4.59E-05 | PEMT         | phosphatidylethanolamine N-methyltransfera        | Multiple_Complex |
| TC0600007694.hg.1    | 5.74  | 6.73  | -1.99 | 5.97E-06 | 4.59E-05 | B3GALT4      | UDP-Gal:betaGlcNAc beta 1,3-galactosyltransf      | Multiple_Complex |
| TC1400010085.hg.1    | 7.81  | 9.62  | -3.51 | 5.97E-06 | 4.59E-05 | TCL1A        | T-cell leukemia/lymphoma 1A                       | Multiple_Complex |
| TC0600008468.hg.1    | 5.29  | 6.59  | -2.47 | 6.02E-06 | 4.63E-05 | FAM135A      | family with sequence similarity 135, member .     | Multiple_Complex |
| TC1200008729.hg.1    | 6.15  | 6.88  | -1.65 | 6.03E-06 | 4.63E-05 | POLR3B       | polymerase (RNA) III (DNA directed) polypepti     | Multiple_Complex |
| TC0300011860.hg.1    | 11.5  | 8.91  | 6.03  | 6.06E-06 | 4.66E-05 | RPL24        | ribosomal protein L24                             | Multiple_Complex |
| TC1700007599.hg.1    | 10.59 | 11.28 | -1.61 | 6.11E-06 | 4.69E-05 | AP2B1        | adaptor-related protein complex 2, beta 1 sub     | Multiple_Complex |

|                   |       |       |        |          |          |            |                                                   |                  |
|-------------------|-------|-------|--------|----------|----------|------------|---------------------------------------------------|------------------|
| TC0300009202.hg.1 | 15.8  | 16.75 | -1.94  | 6.12E-06 | 4.70E-05 | MBNL1      | muscleblind like splicing regulator 1             | Multiple_Complex |
| TC1800006748.hg.1 | 6.41  | 7.22  | -1.75  | 6.12E-06 | 4.70E-05 | SEH1L      | SEH1-like nucleoporin                             | Multiple_Complex |
| TC0600011553.hg.1 | 7.39  | 8.4   | -2.01  | 6.14E-06 | 4.71E-05 | BAK1       | BCL2-antagonist/killer 1                          | Multiple_Complex |
| TC1500008616.hg.1 | 6.14  | 6.96  | -1.76  | 6.17E-06 | 4.73E-05 | HERC2P3    | hect domain and RLD 2 pseudogene 3                | Multiple_Complex |
| TC0200008507.hg.1 | 9.62  | 8.8   | 1.77   | 6.19E-06 | 4.74E-05 | ARID5A     | AT rich interactive domain 5A (MRF1-like)         | Multiple_Complex |
| TC0500009996.hg.1 | 7.08  | 8.08  | -2.01  | 6.19E-06 | 4.74E-05 | NSUN2      | NOP2/Sun RNA methyltransferase family, mer        | Multiple_Complex |
| TC0500013212.hg.1 | 8.69  | 7.4   | 2.45   | 6.26E-06 | 4.79E-05 | SRP19; ZRS | signal recognition particle 19kDa; zinc finger (I | Multiple_Complex |
| TC1900011414.hg.1 | 6.99  | 9.66  | -6.37  | 6.28E-06 | 4.81E-05 | LAIR1      | leukocyte-associated immunoglobulin-like rec      | Multiple_Complex |
| TC1000011135.hg.1 | 6.2   | 7.09  | -1.86  | 6.31E-06 | 4.83E-05 | POLR3A     | polymerase (RNA) III (DNA directed) polypepti     | Multiple_Complex |
| TC1900007871.hg.1 | 11.03 | 10.15 | 1.85   | 6.34E-06 | 4.85E-05 | COX6B1     | cytochrome c oxidase subunit VIb polypeptide      | Multiple_Complex |
| TC0900010470.hg.1 | 6.94  | 5.79  | 2.22   | 6.35E-06 | 4.85E-05 | PRUNE2     | prune homolog 2 (Drosophila)                      | Multiple_Complex |
| TC1200009903.hg.1 | 8.92  | 12.3  | -10.42 | 6.36E-06 | 4.86E-05 | KLRC4-KLRI | KLRC4-KLRI readthrough; killer cell lectin-like   | Multiple_Complex |
| TC0300009625.hg.1 | 7.28  | 8.36  | -2.12  | 6.37E-06 | 4.87E-05 | TTC14      | tetratricopeptide repeat domain 14                | Multiple_Complex |
| TC0600012529.hg.1 | 8.16  | 9.25  | -2.13  | 6.39E-06 | 4.88E-05 | RNGTT      | RNA guanylyltransferase and 5-phosphatase         | Multiple_Complex |
| TC0X00006704.hg.1 | 9.26  | 7.25  | 4.03   | 6.40E-06 | 4.89E-05 | REPS2      | RALBP1 associated Eps domain containing 2         | Multiple_Complex |
| TC1100009962.hg.1 | 9.62  | 8.51  | 2.16   | 6.41E-06 | 4.89E-05 | FAM160A2   | family with sequence similarity 160, member       | Multiple_Complex |
| TC0900011603.hg.1 | 7.32  | 9.7   | -5.19  | 6.41E-06 | 4.89E-05 | ENG        | endoglin                                          | Multiple_Complex |
| TC0100015200.hg.1 | 4.44  | 5.36  | -1.89  | 6.46E-06 | 4.92E-05 | AMIGO1     | adhesion molecule with Ig-like domain 1           | Coding           |
| TC1200007408.hg.1 | 4.34  | 5.6   | -2.4   | 6.46E-06 | 4.93E-05 | TMEM117    | transmembrane protein 117                         | Multiple_Complex |
| TC0500010599.hg.1 | 6.33  | 7.3   | -1.95  | 6.47E-06 | 4.93E-05 | OXCT1      | 3-oxoacid CoA-transferase 1                       | Multiple_Complex |
| TC1400007906.hg.1 | 6.37  | 7.54  | -2.25  | 6.47E-06 | 4.93E-05 | ZC3H14     | zinc finger CCHH-type containing 14               | Multiple_Complex |
| TC0100011215.hg.1 | 5.7   | 6.58  | -1.84  | 6.51E-06 | 4.96E-05 | LGR6       | leucine-rich repeat containing G protein-coupl    | Multiple_Complex |
| TC0200016422.hg.1 | 12.28 | 11.12 | 2.24   | 6.56E-06 | 4.99E-05 | PPP1CB     | protein phosphatase 1, catalytic subunit, beta    | Multiple_Complex |
| TC1700007560.hg.1 | 4.01  | 5.11  | -2.14  | 6.56E-06 | 4.99E-05 | CCL8       | chemokine (C-C motif) ligand 8                    | Coding           |
| TC0100017568.hg.1 | 6.94  | 7.65  | -1.64  | 6.59E-06 | 5.02E-05 | JMJD4      | jumonji domain containing 4                       | Multiple_Complex |
| TC0700011570.hg.1 | 5.51  | 6.1   | -1.5   | 6.61E-06 | 5.03E-05 | YWHAG      | tyrosine 3-monooxygenase/tryptophan 5-mor         | Multiple_Complex |
| TC0600008095.hg.1 | 6.59  | 7.79  | -2.3   | 6.63E-06 | 5.04E-05 | POLR1C     | polymerase (RNA) I polypeptide C                  | Multiple_Complex |
| TC0100015273.hg.1 | 7.84  | 8.64  | -1.73  | 6.63E-06 | 5.04E-05 | WDR77      | WD repeat domain 77                               | Multiple_Complex |
| TC1200009036.hg.1 | 6.2   | 7.13  | -1.9   | 6.65E-06 | 5.05E-05 | FBXW8      | F-box and WD repeat domain containing 8           | Multiple_Complex |
| TC2200009353.hg.1 | 8.49  | 9.41  | -1.89  | 6.73E-06 | 5.11E-05 | SUN2       | Sad1 and UNC84 domain containing 2                | Multiple_Complex |
| TC0300013727.hg.1 | 8.02  | 8.88  | -1.81  | 6.76E-06 | 5.13E-05 | NCBP2      | nuclear cap binding protein subunit 2             | Multiple_Complex |
| TC1000008954.hg.1 | 5.96  | 6.63  | -1.59  | 6.79E-06 | 5.15E-05 | CASP7      | caspase 7                                         | Multiple_Complex |
| TC1300007256.hg.1 | 7.36  | 4.54  | 7.03   | 6.83E-06 | 5.18E-05 | OLFM4      | olfactomedin 4                                    | Coding           |
| TC0100008874.hg.1 | 10.17 | 11.52 | -2.54  | 6.84E-06 | 5.19E-05 | PRKACB     | protein kinase, cAMP-dependent, catalytic, be     | Multiple_Complex |
| TC0300014095.hg.1 | 4.71  | 5.66  | -1.93  | 6.85E-06 | 5.19E-05 | TM4SF19    | transmembrane 4 L six family member 19            | Multiple_Complex |
| TC0200016093.hg.1 | 6.1   | 6.88  | -1.72  | 6.85E-06 | 5.20E-05 | USP40      | ubiquitin specific peptidase 40                   | Multiple_Complex |
| TC0800009865.hg.1 | 5.46  | 6.33  | -1.82  | 6.86E-06 | 5.20E-05 | RP11-8750  | Salzman2013 ANTISENSE, CDS, coding, INTERP        | NonCoding        |
| TC1700010214.hg.1 | 4.47  | 5.39  | -1.89  | 6.87E-06 | 5.20E-05 | FAM222B    | family with sequence similarity 222, member       | Multiple_Complex |
| TC1700008923.hg.1 | 6.55  | 7.4   | -1.81  | 6.88E-06 | 5.21E-05 | UNK        | unkempt family zinc finger                        | Multiple_Complex |
| TC0700009398.hg.1 | 4.87  | 5.82  | -1.93  | 6.88E-06 | 5.21E-05 | TAS2R3     | taste receptor, type 2, member 3                  | Coding           |
| TC0100008260.hg.1 | 6.49  | 5.87  | 1.53   | 6.89E-06 | 5.21E-05 | CDKN2C     | cyclin-dependent kinase inhibitor 2C (p18, inh    | Coding           |
| TC0600012554.hg.1 | 6.7   | 8.28  | -2.99  | 6.94E-06 | 5.25E-05 | BACH2      | BTB and CNC homology 1, basic leucine zipper      | Multiple_Complex |
| TC0400011538.hg.1 | 9.29  | 7.91  | 2.6    | 6.97E-06 | 5.27E-05 | PAPSS1     | 3-phosphoadenosine 5-phosphosulfate synthet       | Multiple_Complex |
| TC1500007217.hg.1 | 6.44  | 7.6   | -2.23  | 6.97E-06 | 5.27E-05 | AP4E1      | adaptor-related protein complex 4, epsilon 1      | Multiple_Complex |
| TC0X00011389.hg.1 | 8.15  | 7.23  | 1.9    | 6.99E-06 | 5.28E-05 | NKAP       | NFKB activating protein                           | Multiple_Complex |
| TC0100009468.hg.1 | 4.52  | 5.65  | -2.19  | 7.00E-06 | 5.29E-05 | LRIG2      | leucine-rich repeats and immunoglobulin-like      | Multiple_Complex |
| TC0600012702.hg.1 | 4.63  | 5.53  | -1.86  | 7.03E-06 | 5.30E-05 | HACE1      | HECT domain and ankyrin repeat containing E       | Multiple_Complex |
| TC1500010792.hg.1 | 11.1  | 9.58  | 2.85   | 7.10E-06 | 5.35E-05 | MCTP2      | multiple C2 domains, transmembrane 2              | Multiple_Complex |
| TC1600010375.hg.1 | 4.74  | 3.74  | 2      | 7.10E-06 | 5.36E-05 | CRNDE      | colorectal neoplasia differentially expressed (I  | Multiple_Complex |
| TC0300007067.hg.1 | 11.91 | 13.53 | -3.05  | 7.13E-06 | 5.38E-05 | MYD88      | myeloid differentiation primary response 88       | Multiple_Complex |
| TC0500013237.hg.1 | 6.64  | 7.37  | -1.65  | 7.16E-06 | 5.40E-05 | HARS2      | histidyl-tRNA synthetase 2, mitochondrial         | Multiple_Complex |
| TC1700012383.hg.1 | 5.48  | 4.56  | 1.89   | 7.18E-06 | 5.41E-05 | OMG        | oligodendrocyte myelin glycoprotein               | Multiple_Complex |
| TC1200007832.hg.1 | 5.74  | 6.85  | -2.16  | 7.18E-06 | 5.41E-05 | NABP2      | nucleic acid binding protein 2                    | Multiple_Complex |
| TC2200007312.hg.1 | 11.41 | 9.69  | 3.3    | 7.24E-06 | 5.45E-05 | LGALS1     | lectin, galactoside-binding, soluble, 1           | Multiple_Complex |
| TC0100007449.hg.1 | 15.09 | 16.22 | -2.19  | 7.24E-06 | 5.45E-05 | SH3BGR1    | SH3 domain binding glutamate-rich protein lik     | Multiple_Complex |
| TC1700008463.hg.1 | 8.3   | 7.1   | 2.29   | 7.27E-06 | 5.47E-05 | DHX40      | DEAH (Asp-Glu-Ala-His) box polypeptide 40         | Multiple_Complex |
| TC1700010849.hg.1 | 8.3   | 9.21  | -1.88  | 7.28E-06 | 5.48E-05 | EFTUD2     | elongation factor Tu GTP binding domain cont      | Multiple_Complex |
| TC1100011258.hg.1 | 6.27  | 7.13  | -1.82  | 7.29E-06 | 5.48E-05 | FIBP       | fibroblast growth factor (acidic) intracellular b | Multiple_Complex |
| TC0700006633.hg.1 | 9.38  | 8.42  | 1.95   | 7.29E-06 | 5.48E-05 | CCZ1; CCZ1 | CCZ1 homolog, vacuolar protein trafficking an     | Multiple_Complex |
| TC1200007842.hg.1 | 6.74  | 7.61  | -1.83  | 7.30E-06 | 5.48E-05 | SPRYD4     | SPRY domain containing 4                          | Coding           |
| TC0900012033.hg.1 | 6.08  | 7.09  | -2.01  | 7.30E-06 | 5.48E-05 | DPP7       | dipeptidyl-peptidase 7                            | Multiple_Complex |
| TC0400011168.hg.1 | 12.47 | 13.45 | -1.96  | 7.31E-06 | 5.49E-05 | HNRNPD     | heterogeneous nuclear ribonucleoprotein D         | Multiple_Complex |
| TC1000008535.hg.1 | 7.3   | 8.12  | -1.76  | 7.33E-06 | 5.50E-05 | ZNF518A    | zinc finger protein 518A                          | Multiple_Complex |
| TC1100011587.hg.1 | 4.31  | 5.69  | -2.59  | 7.34E-06 | 5.51E-05 | FAM168A    | family with sequence similarity 168, member       | Multiple_Complex |
| TC0500013351.hg.1 | 10.4  | 9.38  | 2.03   | 7.38E-06 | 5.54E-05 | FNIP1      | folliculin interacting protein 1                  | Multiple_Complex |
| TC0500007841.hg.1 | 8.14  | 9.36  | -2.32  | 7.39E-06 | 5.55E-05 | AGGF1      | angiogenic factor with G-patch and FHA doma       | Multiple_Complex |
| TC0X00009184.hg.1 | 6.19  | 4.96  | 2.34   | 7.42E-06 | 5.56E-05 | BEND2      | BEN domain containing 2                           | Multiple_Complex |
| TC0200016710.hg.1 | 9.12  | 10.46 | -2.53  | 7.42E-06 | 5.56E-05 | ANKRD36C   | ankyrin repeat domain 36C                         | Multiple_Complex |
| TC0700008579.hg.1 | 7.63  | 8.62  | -1.99  | 7.46E-06 | 5.59E-05 | TRIM56     | tripartite motif containing 56                    | Multiple_Complex |
| TC0100017167.hg.1 | 4.89  | 3.92  | 1.96   | 7.47E-06 | 5.59E-05 | LAMB3; MI  | laminin, beta 3; microRNA 4260                    | Multiple_Complex |

|                      |       |       |       |          |          |            |                                                   |                  |
|----------------------|-------|-------|-------|----------|----------|------------|---------------------------------------------------|------------------|
| TC1600007990.hg.1    | 7.75  | 9.02  | -2.4  | 7.47E-06 | 5.59E-05 | RSPRY1     | ring finger and SPRY domain containing 1          | Multiple_Complex |
| TC0800007080.hg.1    | 14.71 | 16.63 | -3.78 | 7.49E-06 | 5.60E-05 | BNIP3L     | BCL2/adenovirus E1B 19kDa interacting prote       | Multiple_Complex |
| TC1400007625.hg.1    | 6.93  | 7.77  | -1.79 | 7.51E-06 | 5.62E-05 | RBM25      | RNA binding motif protein 25                      | Multiple_Complex |
| TC0100017617.hg.1    | 6.41  | 5.46  | 1.92  | 7.53E-06 | 5.63E-05 | HIST3H2A   | histone cluster 3, H2a                            | Coding           |
| TC1100010483.hg.1    | 8.25  | 9.17  | -1.89 | 7.54E-06 | 5.64E-05 | CSTF3      | cleavage stimulation factor, 3 pre-RNA, subun     | Multiple_Complex |
| TC1900011858.hg.1    | 4.6   | 5.51  | -1.88 | 7.54E-06 | 5.64E-05 | ZNF846     | zinc finger protein 846                           | Multiple_Complex |
| TC0100010074.hg.1    | 6.19  | 5.25  | 1.91  | 7.61E-06 | 5.69E-05 | AQP10      | aquaporin 10                                      | Multiple_Complex |
| TC2100006585.hg.1    | 5.91  | 4.97  | 1.92  | 7.64E-06 | 5.71E-05 | RBM11      | RNA binding motif protein 11                      | Multiple_Complex |
| TC2200008449.hg.1    | 5.63  | 6.59  | -1.96 | 7.67E-06 | 5.72E-05 | DUSP18     | dual specificity phosphatase 18                   | Multiple_Complex |
| TC0200013511.hg.1    | 7.73  | 6.56  | 2.26  | 7.67E-06 | 5.73E-05 | DUSP2      | dual specificity phosphatase 2                    | Multiple_Complex |
| TC0600014045.hg.1    | 6.93  | 7.74  | -1.75 | 7.71E-06 | 5.75E-05 | PDCD2      | programmed cell death 2                           | Multiple_Complex |
| TC0300012029.hg.1    | 11.66 | 12.53 | -1.83 | 7.74E-06 | 5.77E-05 | NAA50      | N(alpha)-acetyltransferase 50, NatE catalytic s   | Multiple_Complex |
| TC1200012593.hg.1    | 10.28 | 8.53  | 3.37  | 7.76E-06 | 5.78E-05 | CLEC4A     | C-type lectin domain family 4, member A           | Coding           |
| TC1700010817.hg.1    | 8.75  | 9.49  | -1.67 | 7.76E-06 | 5.78E-05 | UBTF       | upstream binding transcription factor, RNA pc     | Multiple_Complex |
| TSUnmapped00000277.h | 5.34  | 4.55  | 1.74  | 7.79E-06 | 5.80E-05 | PSMC4      | proteasome 26S subunit, ATPase 4 [Source:HC       | NonCoding        |
| TC2200008837.hg.1    | 9.03  | 9.69  | -1.58 | 7.84E-06 | 5.84E-05 | SNU13      | SNU13 homolog, small nuclear ribonucleoprot       | Multiple_Complex |
| TC0500012271.hg.1    | 9.13  | 7.27  | 3.62  | 7.84E-06 | 5.84E-05 | TAF7       | TAF7 RNA polymerase II, TATA box binding pr       | Multiple_Complex |
| TC1600010439.hg.1    | 10.87 | 9.65  | 2.34  | 7.88E-06 | 5.86E-05 | FAM192A    | family with sequence similarity 192, member       | Multiple_Complex |
| TC2200009278.hg.1    | 8.28  | 6.54  | 3.35  | 7.92E-06 | 5.89E-05 | RBX1       | ring-box 1, E3 ubiquitin protein ligase           | Multiple_Complex |
| TC1600007362.hg.1    | 11.61 | 12.69 | -2.12 | 7.93E-06 | 5.90E-05 | ATXN2L     | ataxin 2-like                                     | Multiple_Complex |
| TC1100011091.hg.1    | 5.43  | 6.18  | -1.68 | 7.97E-06 | 5.93E-05 | B3GAT3     | beta-1,3-glucuronyltransferase 3                  | Multiple_Complex |
| TC1900009001.hg.1    | 4.31  | 5.45  | -2.22 | 7.97E-06 | 5.93E-05 | ZIK1       | zinc finger protein interacting with K protein 1  | Multiple_Complex |
| TC0700006737.hg.1    | 6.72  | 5.61  | 2.15  | 7.98E-06 | 5.93E-05 | ARL4A      | ADP-ribosylation factor like GTPase 4A            | Coding           |
| TC0200015397.hg.1    | 9.55  | 7.87  | 3.21  | 7.98E-06 | 5.93E-05 | CLK1       | CDC like kinase 1                                 | Multiple_Complex |
| TC0X00009882.hg.1    | 4.03  | 4.81  | -1.71 | 7.99E-06 | 5.93E-05 | MTMR8      | myotubularin related protein 8                    | Multiple_Complex |
| TC1500010290.hg.1    | 5.04  | 6.23  | -2.29 | 8.00E-06 | 5.94E-05 | WDR73      | WD repeat domain 73                               | Multiple_Complex |
| TC0200009949.hg.1    | 7.1   | 8.04  | -1.92 | 8.03E-06 | 5.95E-05 | DCAF17     | DDB1 and CUL4 associated factor 17                | Multiple_Complex |
| TC0200016624.hg.1    | 11.34 | 10.15 | 2.29  | 8.13E-06 | 6.03E-05 | KIDINS220  | kinase D-interacting substrate 220kDa             | Multiple_Complex |
| TC0900010903.hg.1    | 6.15  | 5.39  | 1.69  | 8.14E-06 | 6.04E-05 | RP11-569G  | uncharacterized protein LOC158434 [Source:l       | Multiple_Complex |
| TC0600007635.hg.1    | 5.13  | 6.09  | -1.94 | 8.15E-06 | 6.04E-05 | PPT2; EGFL | palmitoyl-protein thioesterase 2; EGF-like-don    | Multiple_Complex |
| TC0300012023.hg.1    | 5.64  | 6.71  | -2.1  | 8.20E-06 | 6.07E-05 | SPICE1     | spindle and centriole associated protein 1        | Multiple_Complex |
| TC0100015591.hg.1    | 6.7   | 7.59  | -1.86 | 8.20E-06 | 6.07E-05 | PIAS3      | protein inhibitor of activated STAT 3             | Multiple_Complex |
| TC0100006875.hg.1    | 10.47 | 8.79  | 3.19  | 8.23E-06 | 6.09E-05 | MFN2       | mitofusin 2                                       | Multiple_Complex |
| TC0700010257.hg.1    | 6.51  | 5.27  | 2.36  | 8.23E-06 | 6.09E-05 | ICA1       | islet cell autoantigen 1                          | Multiple_Complex |
| TC1200010693.hg.1    | 7.36  | 8.54  | -2.27 | 8.25E-06 | 6.10E-05 | TFCP2      | transcription factor CP2                          | Multiple_Complex |
| TC1000009111.hg.1    | 7.22  | 8.19  | -1.96 | 8.26E-06 | 6.11E-05 | WDR11      | WD repeat domain 11                               | Multiple_Complex |
| TC0800007416.hg.1    | 5.55  | 4.57  | 1.97  | 8.26E-06 | 6.11E-05 | GINS4      | GINS complex subunit 4 (Sld5 homolog)             | Multiple_Complex |
| TC1200012636.hg.1    | 16.6  | 17.58 | -1.98 | 8.29E-06 | 6.12E-05 | PCBP2; PCE | poly(rC) binding protein 2; PCBP2 overlapping     | Multiple_Complex |
| TC2000007336.hg.1    | 8.46  | 9.28  | -1.76 | 8.44E-06 | 6.24E-05 | PPP1R16B   | protein phosphatase 1, regulatory subunit 16E     | Multiple_Complex |
| TC0100010824.hg.1    | 6.5   | 5.25  | 2.37  | 8.44E-06 | 6.24E-05 | CACNA1E    | calcium channel, voltage-dependent, R type, a     | Multiple_Complex |
| TC0200012320.hg.1    | 5.36  | 6.34  | -1.97 | 8.48E-06 | 6.26E-05 | MAP4K3     | mitogen-activated protein kinase kinase kinas     | Multiple_Complex |
| TC0600011377.hg.1    | 9.4   | 10.41 | -2.01 | 8.49E-06 | 6.27E-05 | NRM        | nurim (nuclear envelope membrane protein)         | Multiple_Complex |
| TC2200007001.hg.1    | 5.74  | 6.64  | -1.86 | 8.51E-06 | 6.28E-05 | HSCB       | HscB mitochondrial iron-sulfur cluster co-char    | Multiple_Complex |
| TC1900008366.hg.1    | 6.88  | 6.13  | 1.68  | 8.53E-06 | 6.29E-05 | IGFL1      | IGF like family member 1                          | Coding           |
| TC0700010170.hg.1    | 8.46  | 9.23  | -1.7  | 8.54E-06 | 6.30E-05 | RNF216     | ring finger protein 216                           | Multiple_Complex |
| TC2100008487.hg.1    | 7.02  | 6.31  | 1.63  | 8.56E-06 | 6.31E-05 | TPTE       | transmembrane phosphatase with tensin hom         | Multiple_Complex |
| TC1100007247.hg.1    | 12.99 | 13.85 | -1.82 | 8.56E-06 | 6.31E-05 | CAPRIN1    | cell cycle associated protein 1                   | Multiple_Complex |
| TC1200010601.hg.1    | 7.78  | 8.93  | -2.2  | 8.60E-06 | 6.33E-05 | FKBP11; AR | FK506 binding protein 11; ADP-ribosylation fa     | Multiple_Complex |
| TC1200010838.hg.1    | 7.9   | 9.22  | -2.5  | 8.63E-06 | 6.36E-05 | ZNF385A    | zinc finger protein 385A                          | Multiple_Complex |
| TC0700008000.hg.1    | 12.74 | 11.68 | 2.09  | 8.64E-06 | 6.36E-05 | LAT2       | linker for activation of T-cells family member    | Multiple_Complex |
| TC0700007065.hg.1    | 5.25  | 6.38  | -2.19 | 8.67E-06 | 6.38E-05 | PLEKHA8    | pleckstrin homology domain containing, famil      | Multiple_Complex |
| TC1700009708.hg.1    | 10.59 | 11.33 | -1.67 | 8.73E-06 | 6.42E-05 | PIK3R5     | phosphoinositide-3-kinase, regulatory subunit     | Multiple_Complex |
| TC0300009609.hg.1    | 5.76  | 6.53  | -1.71 | 8.73E-06 | 6.42E-05 | ACTL6A     | actin-like 6A                                     | Multiple_Complex |
| TC0300013821.hg.1    | 4.99  | 5.75  | -1.69 | 8.74E-06 | 6.43E-05 | ZNF197     | zinc finger protein 197                           | Multiple_Complex |
| TC0100008584.hg.1    | 6.4   | 7.68  | -2.43 | 8.75E-06 | 6.43E-05 | ALG6       | ALG6, alpha-1,3-glucoyltransferase                | Multiple_Complex |
| TC2200008620.hg.1    | 4.82  | 5.59  | -1.71 | 8.77E-06 | 6.44E-05 | IFT27      | intraflagellar transport 27                       | Multiple_Complex |
| TC1800009280.hg.1    | 4.42  | 5.87  | -2.72 | 8.79E-06 | 6.46E-05 | HDHD2      | haloacid dehalogenase-like hydrolase domain       | Multiple_Complex |
| TC0400012930.hg.1    | 6.37  | 7.32  | -1.93 | 8.82E-06 | 6.47E-05 | COX18      | COX18 cytochrome c oxidase assembly factor        | Multiple_Complex |
| TC0900009414.hg.1    | 7.49  | 8.32  | -1.77 | 8.82E-06 | 6.47E-05 | RFX3       | regulatory factor X, 3 (influences HLA class II e | Multiple_Complex |
| TC0200015779.hg.1    | 4.95  | 5.91  | -1.94 | 8.85E-06 | 6.49E-05 | DNPEP      | aspartyl aminopeptidase                           | Multiple_Complex |
| TC0100016971.hg.1    | 14.67 | 16.89 | -4.65 | 8.95E-06 | 6.56E-05 | ADIPOR1    | adiponectin receptor 1                            | Multiple_Complex |
| TC0500009211.hg.1    | 10.9  | 11.82 | -1.89 | 8.96E-06 | 6.57E-05 | CYFIP2     | cytoplasmic FMR1 interacting protein 2            | Multiple_Complex |
| TC0500010639.hg.1    | 5.19  | 6.24  | -2.06 | 8.97E-06 | 6.57E-05 | CCL28      | chemokine (C-C motif) ligand 28                   | Multiple_Complex |
| TC0X00007744.hg.1    | 13.04 | 11.99 | 2.07  | 8.98E-06 | 6.58E-05 | SH3BGRL    | SH3 domain binding glutamate-rich protein lik     | Multiple_Complex |
| TSUnmapped00000038.h | 6.3   | 7.2   | -1.87 | 9.07E-06 | 6.64E-05 | ZNF780A    | zinc finger protein 780A                          | Coding           |
| TC1700010560.hg.1    | 5.68  | 6.92  | -2.36 | 9.07E-06 | 6.64E-05 | PLXDC1     | plexin domain containing 1                        | Multiple_Complex |
| TC0200007205.hg.1    | 7.17  | 8.28  | -2.17 | 9.07E-06 | 6.64E-05 | RASGRP3    | RAS guanyl releasing protein 3 (calcium and D     | Multiple_Complex |
| TC2000007820.hg.1    | 5.03  | 6.42  | -2.63 | 9.15E-06 | 6.69E-05 | CASS4      | Cas scaffolding protein family member 4           | Multiple_Complex |
| TC0800012288.hg.1    | 7.92  | 6.51  | 2.65  | 9.20E-06 | 6.72E-05 | DCTN6      | dynactin 6                                        | Multiple_Complex |
| TC1100008664.hg.1    | 7.18  | 8.33  | -2.22 | 9.23E-06 | 6.75E-05 | C11orf73   | chromosome 11 open reading frame 73               | Multiple_Complex |

|                   |       |       |       |          |          |                |                                                               |                  |
|-------------------|-------|-------|-------|----------|----------|----------------|---------------------------------------------------------------|------------------|
| TC2200007495.hg.1 | 7.66  | 8.63  | -1.96 | 9.23E-06 | 6.75E-05 | SREBF2         | sterol regulatory element binding transcription factor 2      | Multiple_Complex |
| TC0300012187.hg.1 | 4.6   | 5.89  | -2.45 | 9.27E-06 | 6.77E-05 | WDR5B          | WD repeat domain 5B                                           | Coding           |
| TC1900011724.hg.1 | 5.1   | 5.98  | -1.84 | 9.31E-06 | 6.80E-05 | ZNF540; ZNF571 | zinc finger protein 540; ZNF571 antisense RNA                 | Multiple_Complex |
| TC0800011305.hg.1 | 4.09  | 4.89  | -1.74 | 9.31E-06 | 6.80E-05 | NCALD          | neurocalcin delta                                             | Multiple_Complex |
| TC1500010093.hg.1 | 9.05  | 8.22  | 1.78  | 9.46E-06 | 6.90E-05 | ETF A          | electron-transfer-flavoprotein, alpha polypeptide             | Multiple_Complex |
| TC1100012681.hg.1 | 8.32  | 6.73  | 3.02  | 9.46E-06 | 6.90E-05 | SIAE           | sialic acid acetyltransferase                                 | Multiple_Complex |
| TC0100009064.hg.1 | 5.65  | 4.59  | 2.08  | 9.47E-06 | 6.91E-05 | FNBP1L         | formin binding protein 1-like                                 | Multiple_Complex |
| TC1900011636.hg.1 | 10.8  | 9.66  | 2.2   | 9.48E-06 | 6.91E-05 | UBE2M          | ubiquitin-conjugating enzyme E2M                              | Multiple_Complex |
| TC1100008123.hg.1 | 9.68  | 11    | -2.49 | 9.48E-06 | 6.91E-05 | ADRBK1         | adrenergic, beta, receptor kinase 1                           | Multiple_Complex |
| TC0300013874.hg.1 | 6.12  | 7.24  | -2.17 | 9.50E-06 | 6.92E-05 | SRPRB          | signal recognition particle receptor, B subunit               | Multiple_Complex |
| TC1500008312.hg.1 | 16.19 | 14.8  | 2.61  | 9.58E-06 | 6.97E-05 | IQGAP1         | IQ motif containing GTPase activating protein                 | Multiple_Complex |
| TC0500007699.hg.1 | 9.23  | 10.23 | -2    | 9.59E-06 | 6.98E-05 | SMN1           | survival of motor neuron 1, telomeric                         | Multiple_Complex |
| TC1000010022.hg.1 | 13.9  | 15.29 | -2.62 | 9.65E-06 | 7.02E-05 | PIP4K2A        | phosphatidylinositol-5-phosphate 4-kinase, type 2             | Multiple_Complex |
| TC0200007064.hg.1 | 8.34  | 9.09  | -1.68 | 9.67E-06 | 7.04E-05 | SNX17          | sorting nexin 17                                              | Multiple_Complex |
| TC0200011972.hg.1 | 4.32  | 5.35  | -2.04 | 9.72E-06 | 7.07E-05 | C2orf44        | chromosome 2 open reading frame 44                            | Coding           |
| TC1300006965.hg.1 | 7.81  | 6.99  | 1.76  | 9.74E-06 | 7.08E-05 | WBP4           | WW domain binding protein 4                                   | Coding           |
| TC0100010102.hg.1 | 7.64  | 8.29  | -1.57 | 9.75E-06 | 7.09E-05 | FLAD1          | flavin adenine dinucleotide synthetase 1                      | Multiple_Complex |
| TC1200012831.hg.1 | 8.5   | 9.4   | -1.86 | 9.79E-06 | 7.11E-05 | ZBTB44         | zinc finger and BTB domain containing 44                      | Multiple_Complex |
| TC1900011725.hg.1 | 5.65  | 4.74  | 1.88  | 9.80E-06 | 7.12E-05 | SPINT2         | serine peptidase inhibitor, Kunitz type, 2                    | Multiple_Complex |
| TC0100009876.hg.1 | 11.93 | 10.23 | 3.25  | 9.81E-06 | 7.12E-05 | HIST2H2AA      | histone cluster 2, H2aa3; histone cluster 2, H2a              | Coding           |
| TC2100008533.hg.1 | 6.24  | 5.35  | 1.85  | 9.85E-06 | 7.15E-05 | PCBP3          | poly(rC) binding protein 3                                    | NonCoding        |
| TC0100010044.hg.1 | 6.82  | 7.89  | -2.09 | 9.94E-06 | 7.21E-05 | CHTOP          | chromatin target of PRMT1                                     | Multiple_Complex |
| TC1200010690.hg.1 | 4.95  | 5.74  | -1.73 | 9.96E-06 | 7.22E-05 | CSRNP2         | cysteine-serine-rich nuclear protein 2                        | Multiple_Complex |
| TC0100009568.hg.1 | 9.63  | 10.71 | -2.12 | 1.01E-05 | 7.32E-05 | MAN1A2         | mannosidase, alpha, class 1A, member 2                        | Multiple_Complex |
| TC1500009261.hg.1 | 8.32  | 9.39  | -2.11 | 1.01E-05 | 7.33E-05 | SPG11          | spastic paraplegia 11 (autosomal recessive)                   | Multiple_Complex |
| TC0700012680.hg.1 | 6.03  | 7     | -1.95 | 1.01E-05 | 7.34E-05 | SLC35B4        | solute carrier family 35 (UDP-xylose/UDP-N-acetylglucosamine) | Multiple_Complex |
| TC1100011514.hg.1 | 6.11  | 5.05  | 2.08  | 1.02E-05 | 7.37E-05 | DHCR7          | 7-dehydrocholesterol reductase                                | Multiple_Complex |
| TC1900009491.hg.1 | 7.24  | 8.89  | -3.14 | 1.02E-05 | 7.37E-05 | FCER2          | Fc fragment of IgE, low affinity II, receptor for             | Multiple_Complex |
| TC0600014127.hg.1 | 7.26  | 7.84  | -1.49 | 1.02E-05 | 7.39E-05 | RPL7L1         | ribosomal protein L7-like 1                                   | Multiple_Complex |
| TC0500006816.hg.1 | 8.79  | 7.74  | 2.07  | 1.02E-05 | 7.40E-05 | FAM105A        | family with sequence similarity 105, member 1                 | Multiple_Complex |
| TC1900008084.hg.1 | 6.69  | 7.8   | -2.16 | 1.02E-05 | 7.41E-05 | PSMC4          | proteasome 26S subunit, ATPase 4                              | Multiple_Complex |
| TC1000009420.hg.1 | 7.02  | 6.16  | 1.82  | 1.03E-05 | 7.43E-05 | INPP5A         | Transcript Identified by AceView, Entrez Gene                 | Unassigned       |
| TC0700012451.hg.1 | 5.2   | 4.36  | 1.79  | 1.03E-05 | 7.43E-05 | TAS2R16        | taste receptor, type 2, member 16                             | Coding           |
| TC0900012276.hg.1 | 6.03  | 7.02  | -1.98 | 1.03E-05 | 7.47E-05 | SCAI; GOLG     | suppressor of cancer cell invasion; golgin A1                 | Multiple_Complex |
| TC0200013357.hg.1 | 6.99  | 6.33  | 1.58  | 1.04E-05 | 7.51E-05 | KRCC1          | lysine-rich coiled-coil 1                                     | Multiple_Complex |
| TC0600009884.hg.1 | 6.82  | 5.67  | 2.21  | 1.05E-05 | 7.58E-05 | MYCT1          | myc target 1                                                  | Coding           |
| TC0700011489.hg.1 | 4.91  | 4.4   | 1.43  | 1.05E-05 | 7.58E-05 | TRIM50         | tripartite motif containing 50                                | Multiple_Complex |
| TC0300013123.hg.1 | 7.39  | 6.42  | 1.96  | 1.05E-05 | 7.58E-05 | PLD1           | phospholipase D1, phosphatidylcholine-specific                | Multiple_Complex |
| TC1600011406.hg.1 | 7.14  | 6.06  | 2.11  | 1.06E-05 | 7.62E-05 | CKLF-CMTM1     | CKLF-CMTM1 readthrough                                        | Coding           |
| TC0600011823.hg.1 | 7.79  | 8.67  | -1.84 | 1.06E-05 | 7.65E-05 | TRERF1         | transcriptional regulating factor 1                           | Multiple_Complex |
| TC1900006576.hg.1 | 7.14  | 5.91  | 2.36  | 1.06E-05 | 7.66E-05 | DOT1L          | DOT1-like histone H3K79 methyltransferase                     | Multiple_Complex |
| TC0100007574.hg.1 | 12.81 | 14.5  | -3.21 | 1.07E-05 | 7.68E-05 | EPB41          | erythrocyte membrane protein band 4.1                         | Multiple_Complex |
| TC0500009009.hg.1 | 8.13  | 9.27  | -2.21 | 1.07E-05 | 7.71E-05 | TCERG1         | transcription elongation regulator 1                          | Multiple_Complex |
| TC1100007467.hg.1 | 5.1   | 6.03  | -1.91 | 1.08E-05 | 7.78E-05 | C11orf49       | chromosome 11 open reading frame 49                           | Multiple_Complex |
| TC0500007408.hg.1 | 7.56  | 10.32 | -6.75 | 1.08E-05 | 7.78E-05 | GZMK           | granzyme K                                                    | Multiple_Complex |
| TC0600014279.hg.1 | 6.9   | 7.77  | -1.82 | 1.08E-05 | 7.78E-05 | DAXX           | death-domain associated protein                               | Multiple_Complex |
| TC1000012536.hg.1 | 10.38 | 9.32  | 2.07  | 1.08E-05 | 7.78E-05 | MPP7           | membrane protein, palmitoylated 7                             | Multiple_Complex |
| TC1900010957.hg.1 | 9.06  | 10.06 | -1.99 | 1.08E-05 | 7.78E-05 | SYMPK          | sympkin                                                       | Multiple_Complex |
| TC0X00010198.hg.1 | 5.06  | 6.11  | -2.07 | 1.08E-05 | 7.79E-05 | HDX            | highly divergent homeobox                                     | Multiple_Complex |
| TC0300012567.hg.1 | 7.73  | 8.66  | -1.9  | 1.09E-05 | 7.86E-05 | DBR1           | debranching RNA lariats 1                                     | Multiple_Complex |
| TC0200007144.hg.1 | 7.93  | 9.06  | -2.18 | 1.10E-05 | 7.88E-05 | LCLAT1         | lysocardiolipin acyltransferase 1                             | Multiple_Complex |
| TC0500011896.hg.1 | 6.53  | 5.23  | 2.47  | 1.11E-05 | 7.94E-05 | ZNF608         | zinc finger protein 608                                       | Multiple_Complex |
| TC0100012097.hg.1 | 11.29 | 9.85  | 2.7   | 1.12E-05 | 8.06E-05 | LGALS8         | lectin, galactoside-binding, soluble, 8                       | Multiple_Complex |
| TC1000011690.hg.1 | 8.15  | 7.2   | 1.94  | 1.12E-05 | 8.07E-05 | ARL3           | ADP-ribosylation factor like GTPase 3                         | Multiple_Complex |
| TC0400009179.hg.1 | 5.88  | 6.91  | -2.04 | 1.13E-05 | 8.12E-05 | TMA16          | translation machinery associated 16 homolog                   | Multiple_Complex |
| TC0300010913.hg.1 | 6.12  | 5.46  | 1.58  | 1.13E-05 | 8.13E-05 | CDCP1          | CUB domain containing protein 1                               | Multiple_Complex |
| TC1200012642.hg.1 | 7.2   | 6.41  | 1.74  | 1.14E-05 | 8.16E-05 | BLOC1S1-R      | BLOC1S1-RDH5 readthrough; Uncharacterized                     | Multiple_Complex |
| TC0200012755.hg.1 | 7.91  | 8.8   | -1.85 | 1.14E-05 | 8.17E-05 | CCT4           | chaperonin containing TCP1, subunit 4 (delta)                 | Multiple_Complex |
| TC0300012764.hg.1 | 4.34  | 5.56  | -2.32 | 1.14E-05 | 8.20E-05 | HLTF           | helicase-like transcription factor                            | Multiple_Complex |
| TC0300013788.hg.1 | 9.42  | 8.66  | 1.69  | 1.15E-05 | 8.21E-05 | ARPC4-TTL3     | ARPC4-TTL3 readthrough                                        | Coding           |
| TC1900011781.hg.1 | 7.79  | 8.58  | -1.73 | 1.15E-05 | 8.21E-05 | PRMT1          | protein arginine methyltransferase 1                          | Multiple_Complex |
| TC0100013758.hg.1 | 6.55  | 7.49  | -1.92 | 1.15E-05 | 8.22E-05 | INPP5B         | inositol polyphosphate-5-phosphatase B                        | Multiple_Complex |
| TC1400009225.hg.1 | 9.71  | 8.7   | 2.01  | 1.15E-05 | 8.23E-05 | GMFB           | glia maturation factor, beta                                  | Multiple_Complex |
| TC0100007884.hg.1 | 9.86  | 8.98  | 1.84  | 1.15E-05 | 8.26E-05 | AKIRIN1        | akirin 1                                                      | Multiple_Complex |
| TC1200006773.hg.1 | 6.38  | 8.65  | -4.84 | 1.16E-05 | 8.26E-05 | KLRF1          | killer cell lectin-like receptor subfamily F, member 1        | Multiple_Complex |
| TC1500007711.hg.1 | 5.57  | 4.81  | 1.7   | 1.16E-05 | 8.27E-05 | TLE3           | Memczak2013 ANTISENSE, coding, INTERNAL                       | NonCoding        |
| TC1400009529.hg.1 | 13.66 | 11.88 | 3.45  | 1.16E-05 | 8.29E-05 | ACTN1; HV      | actinin, alpha 1; high mobility group nucleoside              | Multiple_Complex |
| TC0100011364.hg.1 | 8.66  | 9.83  | -2.24 | 1.16E-05 | 8.29E-05 | SRGAP2         | SLIT-ROBO Rho GTPase activating protein 2                     | Multiple_Complex |
| TC0500011881.hg.1 | 6.54  | 7.9   | -2.56 | 1.16E-05 | 8.29E-05 | CEP120         | centrosomal protein 120kDa                                    | Multiple_Complex |
| TC2000007281.hg.1 | 6.8   | 7.53  | -1.65 | 1.17E-05 | 8.35E-05 | MANBAL         | mannosidase, beta A, lysosomal-like                           | Multiple_Complex |

|                     |       |       |       |          |          |            |                                                  |                  |
|---------------------|-------|-------|-------|----------|----------|------------|--------------------------------------------------|------------------|
| TC0800009830.hg.1   | 6.9   | 7.99  | -2.12 | 1.17E-05 | 8.35E-05 | REEP4      | receptor accessory protein 4                     | Multiple_Complex |
| TC0700010760.hg.1   | 10.22 | 11.28 | -2.09 | 1.17E-05 | 8.35E-05 | ELMO1      | engulfment and cell motility 1                   | Multiple_Complex |
| TC0800012324.hg.1   | 4.88  | 5.58  | -1.63 | 1.18E-05 | 8.45E-05 | LRRC69; M  | leucine rich repeat containing 69; microRNA 4    | Multiple_Complex |
| TC0800007370.hg.1   | 4.64  | 3.85  | 1.73  | 1.19E-05 | 8.45E-05 | ADAM32     | ADAM metalloproteinase domain 32                 | Multiple_Complex |
| TC1500009173.hg.1   | 6.93  | 6.21  | 1.65  | 1.19E-05 | 8.48E-05 | EHD4       | EH domain containing 4                           | Multiple_Complex |
| TC0100011940.hg.1   | 6.55  | 7.76  | -2.31 | 1.20E-05 | 8.54E-05 | COG2       | component of oligomeric golgi complex 2          | Multiple_Complex |
| TC1100011395.hg.1   | 7.57  | 6.63  | 1.91  | 1.20E-05 | 8.54E-05 | CPT1A      | carnitine palmitoyltransferase 1A (liver)        | Multiple_Complex |
| TC0100006675.hg.1   | 10.2  | 11.08 | -1.85 | 1.21E-05 | 8.63E-05 | KCNAB2     | potassium channel, voltage gated subfamily A     | Multiple_Complex |
| TC1200006967.hg.1   | 9.35  | 8.66  | 1.6   | 1.21E-05 | 8.64E-05 | DERA       | deoxyribose-phosphate aldolase (putative)        | Multiple_Complex |
| TC0900008959.hg.1   | 7.07  | 8.01  | -1.92 | 1.21E-05 | 8.64E-05 | FUBP3      | far upstream element (FUSE) binding protein      | Multiple_Complex |
| TC1700009383.hg.1   | 7.38  | 6.06  | 2.51  | 1.23E-05 | 8.72E-05 | PITPNA     | Memczak2013 ALT_ACCEPTOR, ALT_DONOR,             | NonCoding        |
| TC0100010877.hg.1   | 5.53  | 6.38  | -1.81 | 1.23E-05 | 8.75E-05 | TSEN15     | TSEN15 tRNA splicing endonuclease subunit        | Multiple_Complex |
| TC0300014020.hg.1   | 10.09 | 11.36 | -2.42 | 1.23E-05 | 8.77E-05 | CLDND1     | claudin domain containing 1                      | Multiple_Complex |
| TC1700008945.hg.1   | 5.62  | 4.73  | 1.85  | 1.23E-05 | 8.77E-05 | SPHK1      | sphingosine kinase 1                             | Multiple_Complex |
| TC1400009386.hg.1   | 5.31  | 4.69  | 1.55  | 1.24E-05 | 8.79E-05 | GPHB5      | glycoprotein hormone beta 5                      | Multiple_Complex |
| TC1600011408.hg.1   | 9.63  | 8.48  | 2.21  | 1.24E-05 | 8.81E-05 | CKLF; CKLF | chemokine-like factor; CKLF-CMTM1 readthro       | Multiple_Complex |
| TC0100006494.hg.1   | 4.89  | 5.55  | -1.58 | 1.24E-05 | 8.81E-05 | B3GALT6    | UDP-Gal:betaGal beta 1,3-galactosyltransfera     | Coding           |
| TC1400008764.hg.1   | 10.74 | 12.42 | -3.19 | 1.24E-05 | 8.82E-05 | GZMB       | granzyme B                                       | Coding           |
| TC1000012519.hg.1   | 8.46  | 9.16  | -1.63 | 1.25E-05 | 8.84E-05 | IL15RA     | interleukin 15 receptor, alpha                   | Multiple_Complex |
| TC1500007180.hg.1   | 6.03  | 7.27  | -2.36 | 1.25E-05 | 8.89E-05 | GALK2      | galactokinase 2                                  | Multiple_Complex |
| TC0700012658.hg.1   | 7.33  | 8.35  | -2.03 | 1.25E-05 | 8.89E-05 | CHCHD3     | coiled-coil-helix-coiled-coil-helix domain cont  | Multiple_Complex |
| TC0900009861.hg.1   | 4.38  | 5.17  | -1.72 | 1.26E-05 | 8.90E-05 | NOL6       | nucleolar protein 6 (RNA-associated)             | Multiple_Complex |
| TC0700011003.hg.1   | 8.9   | 9.76  | -1.82 | 1.26E-05 | 8.92E-05 | HUS1       | HUS1 checkpoint clamp component                  | Multiple_Complex |
| TC1200009137.hg.1   | 7.95  | 8.87  | -1.89 | 1.26E-05 | 8.93E-05 | MLEC       | malectin                                         | Multiple_Complex |
| TC0200008040.hg.1   | 6.29  | 7.15  | -1.81 | 1.26E-05 | 8.93E-05 | SMYD5      | SMYD family member 5                             | Multiple_Complex |
| TC1200010490.hg.1   | 7.09  | 8.92  | -3.56 | 1.27E-05 | 8.96E-05 | NELL2      | neural EGFL like 2                               | Multiple_Complex |
| TC0700012684.hg.1   | 6.78  | 7.81  | -2.04 | 1.27E-05 | 8.98E-05 | AKR1B1     | aldo-keto reductase family 1, member B1 (ald     | Multiple_Complex |
| TC1300008125.hg.1   | 10.23 | 9.19  | 2.04  | 1.27E-05 | 9.00E-05 | LAMP1      | lysosomal-associated membrane protein 1          | Multiple_Complex |
| TC0600012656.hg.1   | 4.85  | 5.94  | -2.13 | 1.27E-05 | 9.00E-05 | USP45      | ubiquitin specific peptidase 45                  | Multiple_Complex |
| TC1100009858.hg.1   | 11.57 | 10.56 | 2.02  | 1.27E-05 | 9.00E-05 | CHRNA10;   | cholinergic receptor, nicotinic alpha 10; nuclei | Multiple_Complex |
| TC1400008763.hg.1   | 6.66  | 8.82  | -4.47 | 1.28E-05 | 9.03E-05 | GZMH       | granzyme H                                       | Coding           |
| TC0400010168.hg.1   | 8.62  | 9.64  | -2.03 | 1.28E-05 | 9.05E-05 | LCORL      | ligand dependent nuclear receptor corepress      | Multiple_Complex |
| TC1100013128.hg.1   | 5.85  | 5.09  | 1.7   | 1.29E-05 | 9.10E-05 | IFITM10    | interferon induced transmembrane protein 10      | Multiple_Complex |
| TC0600008035.hg.1   | 9.78  | 10.82 | -2.06 | 1.30E-05 | 9.15E-05 | TAF8       | TATA box binding protein associated factor 8     | Multiple_Complex |
| TC0900006597.hg.1   | 7.54  | 8.59  | -2.07 | 1.30E-05 | 9.16E-05 | KDM4C      | lysine (K)-specific demethylase 4C               | Multiple_Complex |
| TC1900008669.hg.1   | 4.88  | 5.81  | -1.91 | 1.31E-05 | 9.22E-05 | FPR3       | formyl peptide receptor 3                        | Coding           |
| TC1000012589.hg.1   | 6.71  | 7.7   | -2    | 1.31E-05 | 9.23E-05 | MRPL43     | mitochondrial ribosomal protein L43              | Multiple_Complex |
| TC0300010209.hg.1   | 8.57  | 9.71  | -2.2  | 1.31E-05 | 9.24E-05 | TADA3      | transcriptional adaptor 3                        | Multiple_Complex |
| TC0700012959.hg.1   | 7.56  | 6.83  | 1.66  | 1.32E-05 | 9.28E-05 | EZH2       | enhancer of zeste 2 polycomb repressive com      | Multiple_Complex |
| TC1300009979.hg.1   | 7.91  | 6.45  | 2.76  | 1.32E-05 | 9.28E-05 | UCHL3      | ubiquitin C-terminal hydrolase L3                | Multiple_Complex |
| TC0200015424.hg.1   | 5.6   | 6.89  | -2.44 | 1.32E-05 | 9.32E-05 | ALS2CR12   | amyotrophic lateral sclerosis 2 chromosome r     | Multiple_Complex |
| TC0500008656.hg.1   | 6.37  | 5.02  | 2.56  | 1.33E-05 | 9.35E-05 | AFF4       | Memczak2013 ANTISENSE, CDS, coding, INTEF        | NonCoding        |
| TC0200013578.hg.1   | 9.87  | 11.41 | -2.92 | 1.35E-05 | 9.49E-05 | TMEM131    | transmembrane protein 131                        | Multiple_Complex |
| TC0600013361.hg.1   | 9.59  | 11.23 | -3.12 | 1.35E-05 | 9.51E-05 | CITED2     | Cbp/p300-interacting transactivator, with Glu    | Coding           |
| TC0600009206.hg.1   | 11.25 | 10.13 | 2.18  | 1.35E-05 | 9.51E-05 | MARCKS     | myristoylated alanine-rich protein kinase C su   | Multiple_Complex |
| TC0200015211.hg.1   | 11.04 | 9.67  | 2.58  | 1.35E-05 | 9.52E-05 | SLC40A1    | solute carrier family 40 (iron-regulated transp  | Multiple_Complex |
| TC0400008348.hg.1   | 5.8   | 6.9   | -2.15 | 1.36E-05 | 9.53E-05 | HADH       | hydroxyacyl-CoA dehydrogenase                    | Multiple_Complex |
| TC2000009957.hg.1   | 9.8   | 8.68  | 2.17  | 1.36E-05 | 9.53E-05 | LINC00266  | long intergenic non-protein coding RNA 266-1     | Multiple_Complex |
| TC0200007181.hg.1   | 8.84  | 10.12 | -2.43 | 1.36E-05 | 9.55E-05 | YIPF4      | Yip1 domain family member 4                      | Multiple_Complex |
| TC1500007355.hg.1   | 17.51 | 15.78 | 3.32  | 1.36E-05 | 9.55E-05 | AQP9       | aquaporin 9                                      | Multiple_Complex |
| TC0300009782.hg.1   | 10.45 | 9.02  | 2.68  | 1.36E-05 | 9.57E-05 | EIF4A2; SN | eukaryotic translation initiation factor 4A2; sr | Multiple_Complex |
| TC0100009745.hg.1   | 7.01  | 8.18  | -2.26 | 1.36E-05 | 9.58E-05 | POLR3C     | polymerase (RNA) III (DNA directed) polypepti    | Multiple_Complex |
| TC0200013902.hg.1   | 11.42 | 10.46 | 1.95  | 1.37E-05 | 9.63E-05 | RGPD5; RG  | RANBP2-like and GRIP domain containing 5; R      | Multiple_Complex |
| TC1200011321.hg.1   | 13.94 | 12.31 | 3.11  | 1.38E-05 | 9.67E-05 | OSBPL8     | oxysterol binding protein-like 8                 | Multiple_Complex |
| TC0500008014.hg.1   | 7.47  | 8.25  | -1.72 | 1.38E-05 | 9.70E-05 | RASA1      | RAS p21 protein activator (GTPase activating f   | Multiple_Complex |
| TC0300012315.hg.1   | 6.19  | 7.15  | -1.95 | 1.39E-05 | 9.71E-05 | TPRA1      | transmembrane protein, adipocyte associate       | Multiple_Complex |
| TC1900010372.hg.1   | 5.01  | 6.1   | -2.13 | 1.39E-05 | 9.73E-05 | CEP89      | centrosomal protein 89kDa                        | Multiple_Complex |
| TC0900008207.hg.1   | 8.07  | 7.13  | 1.91  | 1.39E-05 | 9.73E-05 | SEC61B     | Sec61 translocon beta subunit                    | Multiple_Complex |
| TC0800012190.hg.1   | 5.74  | 6.77  | -2.04 | 1.39E-05 | 9.75E-05 | SHARPIN    | SHANK-associated RH domain interactor            | Multiple_Complex |
| TC1600006644.hg.1   | 6.22  | 7.17  | -1.93 | 1.40E-05 | 9.79E-05 | FLYWCH1    | FLYWCH-type zinc finger 1                        | Multiple_Complex |
| TC0300013751.hg.1   | 4.17  | 4.91  | -1.68 | 1.40E-05 | 9.80E-05 | BDH1       | 3-hydroxybutyrate dehydrogenase, type 1          | Multiple_Complex |
| TC0500008849.hg.1   | 9.98  | 8.75  | 2.36  | 1.41E-05 | 9.83E-05 | CYSTM1     | cysteine-rich transmembrane module contain       | Multiple_Complex |
| TC2000007687.hg.1   | 8.46  | 6.96  | 2.83  | 1.41E-05 | 9.86E-05 | LINC01270  | long intergenic non-protein coding RNA 1270      | Multiple_Complex |
| TC0500008633.hg.1   | 8.29  | 9.32  | -2.04 | 1.41E-05 | 9.87E-05 | C5orf56    | chromosome 5 open reading frame 56               | Multiple_Complex |
| TC0200016750.hg.1   | 10.97 | 10    | 1.97  | 1.42E-05 | 9.92E-05 | NFE2L2     | nuclear factor, erythroid 2-like 2               | Multiple_Complex |
| TC0600006442.hg.1   | 6.64  | 7.59  | -1.93 | 1.42E-05 | 9.94E-05 | IRF4       | interferon regulatory factor 4                   | Multiple_Complex |
| TC1100013032.hg.1   | 8.67  | 10.01 | -2.53 | 1.43E-05 | 9.95E-05 | DNAJC4     | DnaJ (Hsp40) homolog, subfamily C, member        | Multiple_Complex |
| TC0100007439.hg.1   | 6.33  | 7.26  | -1.91 | 1.43E-05 | 9.99E-05 | PDIK1L     | PDLIM1 interacting kinase 1 like                 | Coding           |
| TC0100015750.hg.1   | 7.45  | 6.16  | 2.45  | 1.43E-05 | 9.99E-05 | HORMAD1    | HORMA domain containing 1                        | Multiple_Complex |
| TUNmapped00000517.h | 7.02  | 8.23  | -2.31 | 1.43E-05 | 0.0001   | HYOU1      | hypoxia up-regulated 1                           | Coding           |



|                      |       |       |        |          |        |             |                                                  |                  |
|----------------------|-------|-------|--------|----------|--------|-------------|--------------------------------------------------|------------------|
| TC1400009248.hg.1    | 5.14  | 4.12  | 2.03   | 1.44E-05 | 0.0001 | DLGAP5      | discs, large (Drosophila) homolog-associated f   | Multiple_Complex |
| TC0100007784.hg.1    | 10.7  | 9.11  | 3.01   | 1.45E-05 | 0.0001 | AGO4        | argonaute RISC catalytic component 4             | Multiple_Complex |
| TC1500008245.hg.1    | 14.92 | 13.75 | 2.24   | 1.46E-05 | 0.0001 | ABHD2       | abhydrolase domain containing 2                  | Multiple_Complex |
| TC1000012561.hg.1    | 14.29 | 13.08 | 2.32   | 1.47E-05 | 0.0001 | JMJD1C      | jumonji domain containing 1C                     | Multiple_Complex |
| TC0200011803.hg.1    | 5.38  | 6.61  | -2.35  | 1.47E-05 | 0.0001 | NBAS        | neuroblastoma amplified sequence                 | Multiple_Complex |
| TC0200010801.hg.1    | 8.94  | 9.74  | -1.75  | 1.48E-05 | 0.0001 | RQCD1       | RCD1 required for cell differentiation1 homolo   | Multiple_Complex |
| TC0200016684.hg.1    | 8.62  | 9.5   | -1.83  | 1.48E-05 | 0.0001 | TIA1        | TIA1 cytotoxic granule-associated RNA binding    | Multiple_Complex |
| TC0700013619.hg.1    | 5.84  | 6.82  | -1.97  | 1.49E-05 | 0.0001 | RBM28       | RNA binding motif protein 28                     | Multiple_Complex |
| TC0900009860.hg.1    | 6.23  | 7.11  | -1.83  | 1.49E-05 | 0.0001 | AQP3        | aquaporin 3 (Gill blood group)                   | Multiple_Complex |
| TC1100009884.hg.1    | 6.1   | 6.7   | -1.52  | 1.49E-05 | 0.0001 | TRIM68      | tripartite motif containing 68                   | Multiple_Complex |
| TC0800012344.hg.1    | 6.62  | 5.39  | 2.35   | 1.49E-05 | 0.0001 | ZFPM2       | zinc finger protein, FOG family member 2         | Multiple_Complex |
| TC0300010664.hg.1    | 9.11  | 10.1  | -1.99  | 1.49E-05 | 0.0001 | GLB1; TMP   | galactosidase beta 1; transmembrane protein      | Multiple_Complex |
| TC1100009241.hg.1    | 7.18  | 8.1   | -1.89  | 1.49E-05 | 0.0001 | HINFP       | histone H4 transcription factor                  | Multiple_Complex |
| TC0600013519.hg.1    | 6.34  | 7.39  | -2.07  | 1.49E-05 | 0.0001 | ZC3H12D     | zinc finger CCCH-type containing 12D             | Multiple_Complex |
| TC1200007037.hg.1    | 5.12  | 4.08  | 2.06   | 1.50E-05 | 0.0001 | PDE3A       | phosphodiesterase 3A, cGMP-inhibited             | Multiple_Complex |
| TC0100007672.hg.1    | 7.74  | 6.74  | 2      | 1.51E-05 | 0.0001 | EIF3I       | eukaryotic translation initiation factor 3, subu | Multiple_Complex |
| TC0500010779.hg.1    | 4.76  | 6.16  | -2.64  | 1.51E-05 | 0.0001 | SLC38A9     | solute carrier family 38, member 9               | Multiple_Complex |
| TC0300013601.hg.1    | 6.41  | 5.59  | 1.76   | 1.51E-05 | 0.0001 | ATP13A3     | Jeck2013 ALT_ACCEPTOR, ALT_DONOR, codin          | NonCoding        |
| TC0100015728.hg.1    | 10.82 | 11.72 | -1.87  | 1.52E-05 | 0.0001 | APH1A       | APH1A gamma secretase subunit                    | Multiple_Complex |
| TC0200014688.hg.1    | 6.67  | 5.4   | 2.42   | 1.52E-05 | 0.0001 | ERMN        | ermin                                            | Coding           |
| TSUnmapped00000169.h | 8.69  | 9.72  | -2.04  | 1.53E-05 | 0.0001 | TCF20       | transcription factor 20 (AR1)                    | Coding           |
| TSUnmapped00000402.h | 8.69  | 9.72  | -2.04  | 1.53E-05 | 0.0001 | TCF20       | transcription factor 20 (AR1)                    | Coding           |
| TC1100008477.hg.1    | 13.04 | 11.51 | 2.88   | 1.54E-05 | 0.0001 | DGAT2       | diacylglycerol O-acyltransferase 2               | Multiple_Complex |
| TC1100013054.hg.1    | 6.14  | 7.22  | -2.12  | 1.54E-05 | 0.0001 | RAD9A       | RAD9 checkpoint clamp component A                | Multiple_Complex |
| TC0300008735.hg.1    | 14.73 | 16.3  | -2.96  | 1.56E-05 | 0.0001 | RAB7A       | RAB7A, member RAS oncogene family                | Multiple_Complex |
| TC0700013405.hg.1    | 8.72  | 7.86  | 1.81   | 1.56E-05 | 0.0001 | BR13        | brain protein 13                                 | Multiple_Complex |
| TC0200009829.hg.1    | 15.49 | 13.17 | 4.99   | 1.56E-05 | 0.0001 | GCA         | grancalcin, EF-hand calcium binding protein      | Multiple_Complex |
| TC0400006806.hg.1    | 5.68  | 4.86  | 1.77   | 1.56E-05 | 0.0001 | USP17L21    | ubiquitin specific peptidase 17-like family mer  | Coding           |
| TC1700012227.hg.1    | 7.35  | 8.38  | -2.03  | 1.56E-05 | 0.0001 | LRRC37B     | leucine rich repeat containing 37B               | NonCoding        |
| TC0500011754.hg.1    | 11.22 | 12.12 | -1.86  | 1.57E-05 | 0.0001 | TMED7-TIC   | TMED7-TICAM2 readthrough; toll-like recepto      | Multiple_Complex |
| TC1200012718.hg.1    | 7.23  | 6.59  | 1.56   | 1.57E-05 | 0.0001 | PSMD9       | proteasome 26S subunit, non-ATPase 9             | Multiple_Complex |
| TC1100009237.hg.1    | 7.95  | 9.01  | -2.08  | 1.57E-05 | 0.0001 | VPS11       | vacuolar protein sorting 11 homolog (S. cerevi   | Multiple_Complex |
| TC0200016601.hg.1    | 8.08  | 8.69  | -1.53  | 1.57E-05 | 0.0001 | GIGYF2      | GRB10 interacting GYF protein 2                  | Multiple_Complex |
| TC1200006648.hg.1    | 4.91  | 5.96  | -2.06  | 1.57E-05 | 0.0001 | USP5        | ubiquitin specific peptidase 5 (isopeptidase T)  | Multiple_Complex |
| TC2200009219.hg.1    | 12.02 | 14.38 | -5.15  | 1.59E-05 | 0.0001 | IGLL5; MIR1 | immunoglobulin lambda-like polypeptide 5; m      | Multiple_Complex |
| TC1200012606.hg.1    | 12.37 | 11.2  | 2.26   | 1.59E-05 | 0.0001 | LRMP        | lymphoid-restricted membrane protein             | Multiple_Complex |
| TC1900007108.hg.1    | 14.07 | 15.39 | -2.5   | 1.59E-05 | 0.0001 | CALR        | calreticulin                                     | Multiple_Complex |
| TC0800012240.hg.1    | 13.67 | 15.11 | -2.7   | 1.60E-05 | 0.0001 | RPL8; MIR6  | ribosomal protein L8; microRNA 6850              | Multiple_Complex |
| TC2100006618.hg.1    | 10.97 | 12.18 | -2.31  | 1.60E-05 | 0.0001 | USP25       | ubiquitin specific peptidase 25                  | Multiple_Complex |
| TC1200011985.hg.1    | 8.89  | 9.68  | -1.73  | 1.60E-05 | 0.0001 | DDX54       | DEAD (Asp-Glu-Ala-Asp) box polypeptide 54        | Multiple_Complex |
| TC2200007645.hg.1    | 5.38  | 4.52  | 1.81   | 1.60E-05 | 0.0001 | LOC730666   | dynein heavy chain -like pseudogene; TEC         | NonCoding        |
| TC1200011367.hg.1    | 10.66 | 9.54  | 2.16   | 1.60E-05 | 0.0001 | PPP1R12A    | protein phosphatase 1, regulatory subunit 12/    | Multiple_Complex |
| TC0200016344.hg.1    | 5.62  | 6.84  | -2.34  | 1.60E-05 | 0.0001 | MTERF4      | mitochondrial transcription termination factor   | Multiple_Complex |
| TC1700006733.hg.1    | 6.15  | 6.85  | -1.62  | 1.61E-05 | 0.0001 | ELP5        | elongator acetyltransferase complex subunit 5    | Multiple_Complex |
| TC1600011351.hg.1    | 6.9   | 7.85  | -1.93  | 1.61E-05 | 0.0001 | CARHSP1     | Jeck2013 ANTISENSE, CDS, coding, INTERNAL,       | NonCoding        |
| TC0200009447.hg.1    | 12.14 | 11.42 | 1.65   | 1.62E-05 | 0.0001 | UBXN4       | UBX domain protein 4                             | Multiple_Complex |
| TC0600007143.hg.1    | 7.33  | 8.38  | -2.06  | 1.63E-05 | 0.0001 | CDKAL1      | CDK5 regulatory subunit associated protein 1-    | Multiple_Complex |
| TC0500010515.hg.1    | 5.86  | 7.06  | -2.29  | 1.63E-05 | 0.0001 | NUP155      | nucleoporin 155kDa                               | Multiple_Complex |
| TC1400010692.hg.1    | 7.82  | 6.89  | 1.91   | 1.64E-05 | 0.0001 | APOPT1      | apoptogenic 1, mitochondrial                     | Multiple_Complex |
| TC0100007243.hg.1    | 12.35 | 8.78  | 11.92  | 1.65E-05 | 0.0001 | ALPL        | alkaline phosphatase, liver/bone/kidney          | Multiple_Complex |
| TC1200012801.hg.1    | 10.3  | 11.18 | -1.84  | 1.65E-05 | 0.0001 | CS          | citrate synthase                                 | Multiple_Complex |
| TC0200008063.hg.1    | 7.33  | 8.18  | -1.81  | 1.65E-05 | 0.0001 | DGUOK       | deoxyguanosine kinase                            | Multiple_Complex |
| TC1400006674.hg.1    | 5.99  | 6.72  | -1.66  | 1.66E-05 | 0.0001 | C14orf119   | chromosome 14 open reading frame 119             | Multiple_Complex |
| TC1900008999.hg.1    | 4.28  | 4.88  | -1.51  | 1.67E-05 | 0.0001 | ZNF549      | zinc finger protein 549                          | Coding           |
| TC0500011804.hg.1    | 5.53  | 6.52  | -1.99  | 1.67E-05 | 0.0001 | DTWD2       | DTW domain containing 2                          | Multiple_Complex |
| TC0800011597.hg.1    | 6.7   | 5.84  | 1.81   | 1.68E-05 | 0.0001 | EXT1; spaw  | Jeck2013 ALT_ACCEPTOR, ALT_DONOR, codin          | NonCoding        |
| TC1300009538.hg.1    | 4.84  | 4.22  | 1.54   | 1.69E-05 | 0.0001 | OXGR1       | oxoglutarate (alpha-ketoglutarate) receptor 1    | Coding           |
| TC1100010175.hg.1    | 6.61  | 7.96  | -2.56  | 1.70E-05 | 0.0001 | RRAS2       | related RAS viral (r-ras) oncogene homolog 2     | Multiple_Complex |
| TC1300006599.hg.1    | 4.91  | 3.9   | 2.02   | 1.70E-05 | 0.0001 | C1QTNF9B-   | C1QTNF9B antisense RNA 1                         | Multiple_Complex |
| TC0200016704.hg.1    | 9.78  | 8.81  | 1.96   | 1.71E-05 | 0.0001 | RNF103      | ring finger protein 103                          | Multiple_Complex |
| TC0900011120.hg.1    | 7.01  | 5.82  | 2.27   | 1.71E-05 | 0.0001 | KLF4        | Kruppel-like factor 4 (gut)                      | Multiple_Complex |
| TC1300006770.hg.1    | 17.92 | 16.96 | 1.95   | 1.73E-05 | 0.0001 | ALOX5AP     | arachidonate 5-lipoxygenase-activating protei    | Multiple_Complex |
| TC1700010298.hg.1    | 12.46 | 13.73 | -2.4   | 1.74E-05 | 0.0001 | CRLF3       | Memczak2013 ALT_ACCEPTOR, ALT_DONOR,             | NonCoding        |
| TC1000011025.hg.1    | 8.58  | 9.61  | -2.04  | 1.74E-05 | 0.0001 | PPP3CB      | protein phosphatase 3, catalytic subunit, beta   | Multiple_Complex |
| TC1500010910.hg.1    | 13.88 | 9.32  | 23.67  | 1.74E-05 | 0.0001 | RPS17       | ribosomal protein S17                            | Multiple_Complex |
| TC0500012935.hg.1    | 7.18  | 8.07  | -1.84  | 1.74E-05 | 0.0001 | KIAA1191    | KIAA1191                                         | Multiple_Complex |
| TC0900009592.hg.1    | 8.9   | 9.88  | -1.98  | 1.75E-05 | 0.0001 | PSIP1       | PC4 and SFRS1 interacting protein 1              | Multiple_Complex |
| TC0900006937.hg.1    | 6.22  | 7.05  | -1.78  | 1.75E-05 | 0.0001 | ACO1        | aconitase 1, soluble                             | Multiple_Complex |
| TC0800008184.hg.1    | 9.56  | 10.37 | -1.76  | 1.77E-05 | 0.0001 | DECR1       | 2,4-dienoyl-CoA reductase 1, mitochondrial       | Multiple_Complex |
| TC0700011797.hg.1    | 10.58 | 13.98 | -10.54 | 1.77E-05 | 0.0001 | SAMD9L      | sterile alpha motif domain containing 9-like     | Multiple_Complex |

|                      |       |       |       |          |        |           |                                                 |                  |
|----------------------|-------|-------|-------|----------|--------|-----------|-------------------------------------------------|------------------|
| TC0200014584.hg.1    | 9.52  | 8.49  | 2.05  | 1.78E-05 | 0.0001 | MMADHC    | methylmalonic aciduria (cobalamin deficiency    | Multiple_Complex |
| TC1500008341.hg.1    | 11.4  | 9.94  | 2.76  | 1.78E-05 | 0.0001 | MAN2A2    | mannosidase, alpha, class 2A, member 2          | Multiple_Complex |
| TC0600007534.hg.1    | 5.77  | 6.7   | -1.91 | 1.78E-05 | 0.0001 | PRR3      | proline rich 3                                  | Multiple_Complex |
| TSUnmapped00000635.h | 6.49  | 7.59  | -2.15 | 1.78E-05 | 0.0001 | SLC25A26  | solute carrier family 25 (S-adenosylmethionin   | Coding           |
| TC0300007068.hg.1    | 12.73 | 12.05 | 1.6   | 1.78E-05 | 0.0001 | OXS1      | oxidative stress responsive 1                   | Multiple_Complex |
| TC0900011260.hg.1    | 4.15  | 5.25  | -2.14 | 1.79E-05 | 0.0001 | ALAD      | aminolevulinic acid dehydratase                 | Multiple_Complex |
| TC1100012958.hg.1    | 4.16  | 5.43  | -2.41 | 1.79E-05 | 0.0001 | OR56B1    | olfactory receptor, family 56, subfamily B, me  | Coding           |
| TC0X00011382.hg.1    | 9.15  | 8.29  | 1.81  | 1.79E-05 | 0.0001 | ACSL4     | acyl-CoA synthetase long-chain family membe     | Multiple_Complex |
| TC0100018482.hg.1    | 11.89 | 10.17 | 3.31  | 1.79E-05 | 0.0001 | HIST2H2AA | histone cluster 2, H2aa4; histone cluster 2, H2 | Coding           |
| TC2200007489.hg.1    | 4.37  | 5.07  | -1.63 | 1.80E-05 | 0.0001 | C22orf46  | chromosome 22 open reading frame 46             | Multiple_Complex |
| TC0300011309.hg.1    | 5.64  | 4.81  | 1.77  | 1.81E-05 | 0.0001 | ACOX2     | acyl-CoA oxidase 2, branched chain              | Multiple_Complex |
| TC0200014004.hg.1    | 8.82  | 9.89  | -2.1  | 1.81E-05 | 0.0001 | CCDC93    | coiled-coil domain containing 93                | Multiple_Complex |
| TC1200010264.hg.1    | 7.53  | 8.61  | -2.11 | 1.81E-05 | 0.0001 | IPO8      | importin 8                                      | Multiple_Complex |
| TC0600010095.hg.1    | 6.22  | 7.3   | -2.11 | 1.82E-05 | 0.0001 | MAP3K4    | mitogen-activated protein kinase kinase kinas   | Multiple_Complex |
| TC0300007078.hg.1    | 6.47  | 7.37  | -1.87 | 1.83E-05 | 0.0001 | EXO1      | endo/exonuclease (5-3), endonuclease G-like     | Multiple_Complex |
| TC0800007554.hg.1    | 6.99  | 5.41  | 2.99  | 1.83E-05 | 0.0001 | UBE2V2    | ubiquitin conjugating enzyme E2 variant 2       | Multiple_Complex |
| TC0400012934.hg.1    | 7.43  | 8.43  | -2    | 1.84E-05 | 0.0001 | SDAD1     | SDA1 domain containing 1                        | Multiple_Complex |
| TC1900007754.hg.1    | 5.91  | 6.83  | -1.89 | 1.84E-05 | 0.0001 | NUDT19    | nudix hydrolase 19                              | Multiple_Complex |
| TC0100015364.hg.1    | 9.27  | 7.91  | 2.57  | 1.85E-05 | 0.0001 | TSPAN2    | tetraspanin 2                                   | Multiple_Complex |
| TC0100015352.hg.1    | 10.29 | 9.61  | 1.6   | 1.85E-05 | 0.0001 | NRAS      | neuroblastoma RAS viral (v-ras) oncogene hor    | Multiple_Complex |
| TC0500011984.hg.1    | 9.88  | 8.46  | 2.67  | 1.85E-05 | 0.0001 | HINT1     | histidine triad nucleotide binding protein 1    | Multiple_Complex |
| TC1200009157.hg.1    | 6.89  | 7.74  | -1.8  | 1.85E-05 | 0.0001 | P2RX7     | purinergic receptor P2X, ligand gated ion char  | Multiple_Complex |
| TC0600007196.hg.1    | 4.33  | 5.37  | -2.06 | 1.86E-05 | 0.0001 | MRS2      | MRS2 magnesium transporter                      | Multiple_Complex |
| TC0100018237.hg.1    | 9.03  | 7.85  | 2.27  | 1.86E-05 | 0.0001 | RABGGTB1  | Rab geranylgeranyltransferase, beta subunit; t  | Multiple_Complex |
| TC0700013584.hg.1    | 7.13  | 5.96  | 2.25  | 1.86E-05 | 0.0001 | CYP51A1   | cytochrome P450, family 51, subfamily A, pol    | Multiple_Complex |
| TC0300007121.hg.1    | 4.43  | 5.48  | -2.07 | 1.87E-05 | 0.0001 | ZNF619    | zinc finger protein 619                         | Multiple_Complex |
| TC0500008431.hg.1    | 8.63  | 9.45  | -1.77 | 1.87E-05 | 0.0001 | DMXL1     | Dmx-like 1                                      | Multiple_Complex |
| TC0900008091.hg.1    | 6.57  | 7.66  | -2.12 | 1.88E-05 | 0.0001 | ERCC6L2   | excision repair cross-complementation group     | Multiple_Complex |
| TC0600013251.hg.1    | 8.91  | 8     | 1.88  | 1.89E-05 | 0.0001 | HBS1L     | HBS1-like translational GTPase                  | Multiple_Complex |
| TC1100011606.hg.1    | 7.87  | 8.72  | -1.81 | 1.89E-05 | 0.0001 | C2CD3     | C2 calcium-dependent domain containing 3        | Multiple_Complex |
| TC0500007249.hg.1    | 8.64  | 9.23  | -1.5  | 1.89E-05 | 0.0001 | C5orf51   | chromosome 5 open reading frame 51              | Multiple_Complex |
| TC0100008124.hg.1    | 5.16  | 6.08  | -1.89 | 1.91E-05 | 0.0001 | MMACHC    | methylmalonic aciduria (cobalamin deficiency    | Multiple_Complex |
| TC0200013746.hg.1    | 6.47  | 7.37  | -1.86 | 1.91E-05 | 0.0001 | TGFBRAP1  | transforming growth factor beta receptor assc   | Multiple_Complex |
| TC2200007027.hg.1    | 4.61  | 5.16  | -1.47 | 1.91E-05 | 0.0001 | NF2       | neurofibromin 2 (merlin)                        | Multiple_Complex |
| TC0300009738.hg.1    | 8.09  | 6.78  | 2.47  | 1.91E-05 | 0.0001 | SEN2      | SUMO1/sentrin/SMT3 specific peptidase 2         | Multiple_Complex |
| TC0900008795.hg.1    | 6.8   | 7.77  | -1.95 | 1.93E-05 | 0.0001 | RALGPS1   | Ral GEF with PH domain and SH3 binding moti     | Multiple_Complex |
| TC1100011568.hg.1    | 12.48 | 13.78 | -2.46 | 1.94E-05 | 0.0001 | FCHSD2    | FCH and double SH3 domains 2                    | Multiple_Complex |
| TC1000007461.hg.1    | 6.69  | 7.7   | -2.02 | 1.94E-05 | 0.0001 | RASSF4    | Ras association (RalGDS/AF-6) domain family     | Multiple_Complex |
| TC1900011753.hg.1    | 4.74  | 5.67  | -1.91 | 1.95E-05 | 0.0001 | ZNF284    | zinc finger protein 284                         | Multiple_Complex |
| TC0400011466.hg.1    | 18.54 | 17.78 | 1.7   | 1.95E-05 | 0.0001 | UBE2D3    | ubiquitin conjugating enzyme E2D 3              | Multiple_Complex |
| TC0500010998.hg.1    | 9.03  | 7.64  | 2.62  | 1.97E-05 | 0.0001 | CCDC125   | coiled-coil domain containing 125               | Multiple_Complex |
| TC0300006577.hg.1    | 9.06  | 7.99  | 2.11  | 1.97E-05 | 0.0001 | BRK1      | BRICK1, SCAR/WAVE actin-nucleating comple       | Multiple_Complex |
| TC2200007109.hg.1    | 5.97  | 7.03  | -2.08 | 1.97E-05 | 0.0001 | DEPDC5    | DEP domain containing 5                         | Multiple_Complex |
| TC1700011249.hg.1    | 7.06  | 5.71  | 2.55  | 1.97E-05 | 0.0001 | MPO       | myeloperoxidase                                 | Multiple_Complex |
| TC0100006884.hg.1    | 6.71  | 7.58  | -1.82 | 1.98E-05 | 0.0001 | VPS13D    | vacuolar protein sorting 13 homolog D (S. cere  | Multiple_Complex |
| TC0100014218.hg.1    | 8.17  | 9.19  | -2.04 | 1.98E-05 | 0.0001 | SCP2      | Jeck2013 ANTISENSE, coding, INTERNAL, OVE       | Multiple_Complex |
| TC1500008988.hg.1    | 8.93  | 9.95  | -2.03 | 1.99E-05 | 0.0001 | GOLGA8A   | golgin A8 family, member A; golgin A8 family,   | Multiple_Complex |
| TC0700007267.hg.1    | 4.56  | 5.67  | -2.15 | 2.00E-05 | 0.0001 | YAE1D1    | Yae1 domain containing 1                        | Multiple_Complex |
| TC1700007851.hg.1    | 18.42 | 17.6  | 1.76  | 2.00E-05 | 0.0001 | EIF1      | eukaryotic translation initiation factor 1      | Multiple_Complex |
| TC1600006976.hg.1    | 5.25  | 6.54  | -2.45 | 2.01E-05 | 0.0001 | ERCC4     | excision repair cross-complementation group     | Multiple_Complex |
| TSUnmapped00000175.h | 5.43  | 6.21  | -1.72 | 2.01E-05 | 0.0001 | NDUFA10   | NADH dehydrogenase (ubiquinone) 1 alpha su      | Coding           |
| TC1300007549.hg.1    | 5.45  | 6.37  | -1.89 | 2.01E-05 | 0.0001 | CLN5      | ceroid-lipofuscinosis, neuronal 5               | Multiple_Complex |
| TC0X00010813.hg.1    | 5.84  | 6.89  | -2.07 | 2.02E-05 | 0.0001 | ENOX2     | ecto-NOX disulfide-thiol exchanger 2            | Multiple_Complex |
| TC0X00010966.hg.1    | 8.06  | 9.13  | -2.09 | 2.02E-05 | 0.0001 | ATP11C    | ATPase, class VI, type 11C                      | Multiple_Complex |
| TC1200010299.hg.1    | 9.5   | 8.37  | 2.19  | 2.03E-05 | 0.0001 | H3F3C     | H3 histone, family 3C                           | Coding           |
| TC0X00010211.hg.1    | 5.76  | 6.82  | -2.07 | 2.04E-05 | 0.0001 | CHM       | choroideremia (Rab escort protein 1)            | Multiple_Complex |
| TC0300011039.hg.1    | 4.33  | 3.69  | 1.55  | 2.05E-05 | 0.0001 | ARIH2OS   | ariadne homolog 2 opposite strand               | Coding           |
| TC1000012423.hg.1    | 9.12  | 9.86  | -1.66 | 2.06E-05 | 0.0001 | PFKP      | phosphofructokinase, platelet                   | Multiple_Complex |
| TC1700009566.hg.1    | 10.15 | 11.2  | -2.07 | 2.06E-05 | 0.0001 | NLRP1     | NLR family, pyrin domain containing 1           | Multiple_Complex |
| TC0200012925.hg.1    | 8.69  | 7.6   | 2.14  | 2.07E-05 | 0.0001 | C1D       | C1D nuclear receptor corepressor                | Multiple_Complex |
| TC2000009731.hg.1    | 9.48  | 8.15  | 2.51  | 2.08E-05 | 0.0001 | PSMA7     | proteasome subunit alpha 7                      | Multiple_Complex |
| TC0100016318.hg.1    | 8.17  | 7.62  | 1.46  | 2.09E-05 | 0.0001 | MPC2      | mitochondrial pyruvate carrier 2                | Multiple_Complex |
| TC0100015725.hg.1    | 7.84  | 6.9   | 1.92  | 2.10E-05 | 0.0001 | ANP32E    | acidic nuclear phosphoprotein 32 family mem     | Multiple_Complex |
| TC1100007771.hg.1    | 7.94  | 9.56  | -3.09 | 2.11E-05 | 0.0001 | MS4A1     | membrane-spanning 4-domains, subfamily A,       | Multiple_Complex |
| TC0600007605.hg.1    | 11.66 | 12.78 | -2.16 | 2.11E-05 | 0.0001 | LY6G5B    | CS lymphocyte antigen 6 complex, locus G5B; cas | Multiple_Complex |
| TC0400007617.hg.1    | 10.26 | 11.11 | -1.81 | 2.12E-05 | 0.0001 | POLR2B    | polymerase (RNA) II (DNA directed) polypepti    | Multiple_Complex |
| TC0300013108.hg.1    | 7.6   | 8.78  | -2.27 | 2.12E-05 | 0.0001 | TNIK      | TRAF2 and NCK interacting kinase                | Multiple_Complex |
| TC0100015822.hg.1    | 18.73 | 19.43 | -1.63 | 2.13E-05 | 0.0001 | S100A11   | S100 calcium binding protein A11                | Multiple_Complex |
| TC0800009232.hg.1    | 5.33  | 4.65  | 1.59  | 2.13E-05 | 0.0001 | SPATC1    | spermatogenesis and centriole associated 1      | Coding           |
| TC0500011579.hg.1    | 12.3  | 13.58 | -2.43 | 2.13E-05 | 0.0001 | ST8SIA4   | ST8 alpha-N-acetyl-neuraminidase alpha-2,8-sial | Multiple_Complex |

|                      |       |       |        |          |        |            |                                                  |                  |
|----------------------|-------|-------|--------|----------|--------|------------|--------------------------------------------------|------------------|
| TC0700009369.hg.1    | 5.07  | 4.23  | 1.79   | 2.13E-05 | 0.0001 | RAB19      | RAB19, member RAS oncogene family                | Multiple_Complex |
| TC0500010523.hg.1    | 7.51  | 6.68  | 1.78   | 2.13E-05 | 0.0001 | GDNF       | glial cell derived neurotrophic factor           | Multiple_Complex |
| TC0500011095.hg.1    | 6.23  | 7.09  | -1.81  | 2.15E-05 | 0.0001 | MRPS27     | mitochondrial ribosomal protein S27              | Multiple_Complex |
| TC0800012446.hg.1    | 17.53 | 16.56 | 1.96   | 2.15E-05 | 0.0001 | YWHAZ      | tyrosine 3-monooxygenase/tryptophan 5-mor        | Multiple_Complex |
| TC0700013596.hg.1    | 7.08  | 6.24  | 1.79   | 2.15E-05 | 0.0001 | TSC22D4    | TSC22 domain family, member 4                    | Multiple_Complex |
| TC1500009639.hg.1    | 6.09  | 7.32  | -2.34  | 2.16E-05 | 0.0001 | ICE2       | interactor of little elongation complex ELL sub  | Multiple_Complex |
| TC1100009225.hg.1    | 6.24  | 7.69  | -2.73  | 2.16E-05 | 0.0001 | CXCR5      | chemokine (C-X-C motif) receptor 5               | Coding           |
| TC1000011323.hg.1    | 9.24  | 10.13 | -1.86  | 2.16E-05 | 0.0001 | GLUD1      | glutamate dehydrogenase 1                        | Multiple_Complex |
| TC1800006655.hg.1    | 6.32  | 5.58  | 1.67   | 2.17E-05 | 0.0001 | TXNDC2     | thioredoxin domain containing 2 (spermatozo      | Multiple_Complex |
| TC0900010485.hg.1    | 12.93 | 11.13 | 3.5    | 2.18E-05 | 0.0001 | GNAQ       | guanine nucleotide binding protein (G protein    | Multiple_Complex |
| TC0100016337.hg.1    | 4.84  | 6.22  | -2.6   | 2.18E-05 | 0.0001 | XCL2       | chemokine (C motif) ligand 2                     | Coding           |
| TC1200012708.hg.1    | 10.24 | 14.63 | -20.93 | 2.19E-05 | 0.0001 | OAS1       | 2-5-oligoadenylate synthetase 1                  | Multiple_Complex |
| TC1400010045.hg.1    | 15.12 | 14.11 | 2.01   | 2.19E-05 | 0.0001 | SERPINA1   | serpin peptidase inhibitor, clade A (alpha-1 an  | Multiple_Complex |
| TC1600011314.hg.1    | 5.86  | 7.45  | -3     | 2.19E-05 | 0.0001 | HBM        | hemoglobin, mu                                   | Coding           |
| TC0600013205.hg.1    | 17.83 | 14.73 | 8.58   | 2.20E-05 | 0.0001 | VNN2       | vanin 2                                          | Multiple_Complex |
| TC2100007327.hg.1    | 5.11  | 5.69  | -1.5   | 2.20E-05 | 0.0001 | RRP1       | ribosomal RNA processing 1                       | Multiple_Complex |
| TC1200012841.hg.1    | 8.49  | 7.51  | 1.97   | 2.22E-05 | 0.0001 | SSH1       | slingshot protein phosphatase 1                  | Multiple_Complex |
| TC1600008709.hg.1    | 7.1   | 5.83  | 2.41   | 2.22E-05 | 0.0001 | COX4I1     | cytochrome c oxidase subunit IV isoform 1        | Multiple_Complex |
| TC0900009950.hg.1    | 11.87 | 9.74  | 4.38   | 2.23E-05 | 0.0001 | TLN1; MIR6 | taln1 1; microRNA 6852                           | Multiple_Complex |
| TC0700008626.hg.1    | 9.1   | 7.92  | 2.26   | 2.23E-05 | 0.0001 | ORAI2      | ORAI calcium release-activated calcium modu      | Multiple_Complex |
| TC0100018466.hg.1    | 5.59  | 4.17  | 2.68   | 2.23E-05 | 0.0001 | DENND2C    | DENN/MADD domain containing 2C                   | Multiple_Complex |
| TC0900011396.hg.1    | 10    | 10.64 | -1.56  | 2.24E-05 | 0.0001 | RAB14      | RAB14, member RAS oncogene family                | Coding           |
| TC0700011813.hg.1    | 6.65  | 7.84  | -2.29  | 2.24E-05 | 0.0001 | BET1       | Bet1 golgi vesicular membrane trafficking proi   | Multiple_Complex |
| TC0600009628.hg.1    | 11.75 | 10.87 | 1.84   | 2.24E-05 | 0.0001 | HECA       | hdc homolog, cell cycle regulator                | Multiple_Complex |
| TC0700007392.hg.1    | 9.83  | 10.66 | -1.78  | 2.24E-05 | 0.0001 | OGDH       | oxoglutarate (alpha-ketoglutarate) dehydroge     | Multiple_Complex |
| TC0600011499.hg.1    | 6.54  | 8.57  | -4.08  | 2.25E-05 | 0.0001 | HLA-DQB1   | major histocompatibility complex, class II, DQ   | Multiple_Complex |
| TC1900009369.hg.1    | 8.39  | 7.72  | 1.6    | 2.25E-05 | 0.0001 | PLIN3      | perilipin 3                                      | Multiple_Complex |
| TC1700007993.hg.1    | 4.85  | 6.09  | -2.38  | 2.26E-05 | 0.0001 | RUNDC3A    | RUN domain containing 3A                         | Multiple_Complex |
| TC0700013162.hg.1    | 9.56  | 10.46 | -1.86  | 2.26E-05 | 0.0001 | PAXIP1     | PAX interacting (with transcription-activation   | Multiple_Complex |
| TC0100014768.hg.1    | 4.59  | 5.74  | -2.21  | 2.26E-05 | 0.0001 | MCOLN2     | mucolipin 2                                      | Multiple_Complex |
| TC0200015764.hg.1    | 9.57  | 10.48 | -1.88  | 2.29E-05 | 0.0002 | CNPPD1     | cyclin Pas1/PHO80 domain containing 1            | Multiple_Complex |
| TC1600007537.hg.1    | 6.19  | 5.56  | 1.55   | 2.29E-05 | 0.0002 | TGFB1I1    | transforming growth factor beta 1 induced tra    | Multiple_Complex |
| TC0100006501.hg.1    | 5.44  | 6.27  | -1.78  | 2.29E-05 | 0.0002 | CPTP       | ceramide-1-phosphate transfer protein            | Multiple_Complex |
| TC0300010213.hg.1    | 8.74  | 9.45  | -1.63  | 2.30E-05 | 0.0002 | RPUSD3     | RNA pseudouridylylase synthase domain contain    | Multiple_Complex |
| TC1900009838.hg.1    | 12.34 | 10.68 | 3.17   | 2.30E-05 | 0.0002 | ADGRE2     | adhesion G protein-coupled receptor E2           | Multiple_Complex |
| TC0X00008731.hg.1    | 8.03  | 8.72  | -1.62  | 2.31E-05 | 0.0002 | VMA21      | VMA21 vacuolar H+-ATPase homolog (S. cerev       | Multiple_Complex |
| TC0700008870.hg.1    | 6.15  | 4.88  | 2.41   | 2.32E-05 | 0.0002 | CAV2       | caveolin 2                                       | Multiple_Complex |
| TC1700008467.hg.1    | 16.93 | 14.86 | 4.18   | 2.35E-05 | 0.0002 | VMP1; MIR  | vacuole membrane protein 1; microRNA 21          | Multiple_Complex |
| TC0600010797.hg.1    | 7.83  | 6.54  | 2.44   | 2.36E-05 | 0.0002 | MAK        | male germ cell-associated kinase                 | Coding           |
| TC1700008378.hg.1    | 7.11  | 8.21  | -2.14  | 2.36E-05 | 0.0002 | MSI2       | musashi RNA binding protein 2                    | Multiple_Complex |
| TC1200011946.hg.1    | 8.48  | 7.6   | 1.83   | 2.36E-05 | 0.0002 | BRAP       | BRCA1 associated protein                         | Multiple_Complex |
| TC0700006781.hg.1    | 5.54  | 6.41  | -1.83  | 2.37E-05 | 0.0002 | BZW2       | basic leucine zipper and W2 domains 2            | Multiple_Complex |
| TC0100010284.hg.1    | 8.24  | 9.28  | -2.05  | 2.37E-05 | 0.0002 | PEA15      | phosphoprotein enriched in astrocytes 15         | Multiple_Complex |
| TC0400011203.hg.1    | 9.12  | 7.66  | 2.75   | 2.38E-05 | 0.0002 | HPSE       | heparanase                                       | Multiple_Complex |
| TC2000007900.hg.1    | 9.68  | 10.76 | -2.12  | 2.40E-05 | 0.0002 | VAPB       | VAMP (vesicle-associated membrane protein)       | Multiple_Complex |
| TC1300009895.hg.1    | 6.5   | 7.29  | -1.73  | 2.40E-05 | 0.0002 | PCID2      | PCI domain containing 2                          | Multiple_Complex |
| TC0500011655.hg.1    | 7.56  | 8.57  | -2.01  | 2.40E-05 | 0.0002 | FBXL17     | F-box and leucine-rich repeat protein 17         | Multiple_Complex |
| TC0300007242.hg.1    | 8.79  | 9.93  | -2.2   | 2.40E-05 | 0.0002 | SACM1L     | SAC1 suppressor of actin mutations 1-like (ye    | Multiple_Complex |
| TC1200006643.hg.1    | 6.9   | 8.35  | -2.74  | 2.42E-05 | 0.0002 | PTMS       | parathymosin                                     | Multiple_Complex |
| TC0800010171.hg.1    | 4.3   | 3.72  | 1.49   | 2.42E-05 | 0.0002 | C8orf86    | chromosome 8 open reading frame 86               | Coding           |
| TC0100017947.hg.1    | 5.56  | 6.54  | -1.97  | 2.42E-05 | 0.0002 | OPN3       | opsin 3                                          | Multiple_Complex |
| TSUnmapped00000183.h | 8.08  | 8.74  | -1.58  | 2.43E-05 | 0.0002 | VPS11      | VPS11, CORVET/HOPS core subunit [Source:HG       | NonCoding        |
| TC0100014743.hg.1    | 5.25  | 3.95  | 2.47   | 2.44E-05 | 0.0002 | TTL7       | tubulin tyrosine ligase-like family member 7     | Multiple_Complex |
| TC0900012218.hg.1    | 4.89  | 5.96  | -2.1   | 2.45E-05 | 0.0002 | KLHL9      | kelch-like family member 9                       | Coding           |
| TC1700006808.hg.1    | 5.32  | 6.11  | -1.74  | 2.46E-05 | 0.0002 | RANGRF     | RAN guanine nucleotide release factor            | Multiple_Complex |
| TC1200012281.hg.1    | 7.97  | 8.84  | -1.84  | 2.46E-05 | 0.0002 | EIF2B1     | eukaryotic translation initiation factor 2B, sub | Multiple_Complex |
| TC1700011171.hg.1    | 6.63  | 7.68  | -2.06  | 2.46E-05 | 0.0002 | COX11      | COX11 cytochrome c oxidase copper chaperon       | Multiple_Complex |
| TC0900011623.hg.1    | 5.09  | 5.67  | -1.49  | 2.48E-05 | 0.0002 | PTGES2     | prostaglandin E synthase 2                       | Multiple_Complex |
| TC1900010533.hg.1    | 5.64  | 6.24  | -1.52  | 2.48E-05 | 0.0002 | ZNF850     | zinc finger protein 850                          | Multiple_Complex |
| TC1300007164.hg.1    | 6.98  | 7.8   | -1.77  | 2.48E-05 | 0.0002 | SETDB2     | SET domain, bifurcated 2                         | Multiple_Complex |
| TC1700012341.hg.1    | 8.71  | 9.54  | -1.78  | 2.50E-05 | 0.0002 | C1QBP      | complement component 1, q subcomponent 1         | Multiple_Complex |
| TC0100007789.hg.1    | 8.96  | 9.77  | -1.76  | 2.51E-05 | 0.0002 | AGO3       | argonaute RISC catalytic component 3             | Multiple_Complex |
| TC0200011386.hg.1    | 8.33  | 9.39  | -2.09  | 2.52E-05 | 0.0002 | PPP1R7     | protein phosphatase 1, regulatory subunit 7      | Multiple_Complex |
| TC0100018298.hg.1    | 9.08  | 10.03 | -1.93  | 2.52E-05 | 0.0002 | INTS3      | integrator complex subunit 3                     | Multiple_Complex |
| TC1600007275.hg.1    | 9.34  | 10.24 | -1.86  | 2.53E-05 | 0.0002 | LCMT1      | leucine carboxyl methyltransferase 1             | Multiple_Complex |
| TC0300012281.hg.1    | 9.2   | 10.22 | -2.04  | 2.54E-05 | 0.0002 | ZXDC       | ZXD family zinc finger C                         | Multiple_Complex |
| TC1600008971.hg.1    | 6.27  | 7.15  | -1.84  | 2.54E-05 | 0.0002 | JMJD8      | jumonji domain containing 8                      | Multiple_Complex |
| TC0100012242.hg.1    | 7.58  | 6.41  | 2.26   | 2.55E-05 | 0.0002 | EFCAB2     | EF-hand calcium binding domain 2                 | Multiple_Complex |
| TC0700013355.hg.1    | 7.24  | 5.89  | 2.55   | 2.55E-05 | 0.0002 | NME8       | NME/NM23 family member 8                         | Multiple_Complex |
| TC0500009250.hg.1    | 11.45 | 12.54 | -2.14  | 2.55E-05 | 0.0002 | UBLCP1     | ubiquitin-like domain containing CTD phospho     | Multiple_Complex |

|                      |       |       |       |          |                  |                                                           |                  |
|----------------------|-------|-------|-------|----------|------------------|-----------------------------------------------------------|------------------|
| TC0700010918.hg.1    | 6.36  | 7.33  | -1.96 | 2.55E-05 | 0.0002 NUDCD3    | NudC domain containing 3                                  | Multiple_Complex |
| TC0200015721.hg.1    | 8.37  | 9.27  | -1.86 | 2.56E-05 | 0.0002 TMBIM1;   | N transmembrane BAX inhibitor motif containin             | Multiple_Complex |
| TC1200011968.hg.1    | 9.11  | 10.1  | -1.99 | 2.56E-05 | 0.0002 HECTD4;   | M HECT domain containing E3 ubiquitin protein l           | Multiple_Complex |
| TC1000011363.hg.1    | 4.38  | 4.8   | -1.34 | 2.57E-05 | 0.0002 RNLS      | renalase, FAD-dependent amine oxidase                     | Multiple_Complex |
| TC1000006768.hg.1    | 13.72 | 14.87 | -2.21 | 2.57E-05 | 0.0002 CELF2     | Transcript Identified by AceView, Entrez Gene             | Unassigned       |
| TC0100015337.hg.1    | 6.06  | 6.94  | -1.84 | 2.58E-05 | 0.0002 AP4B1     | adaptor-related protein complex 4, beta 1 sub             | Multiple_Complex |
| TC0600013719.hg.1    | 8.58  | 7.47  | 2.16  | 2.59E-05 | 0.0002 DYNLT1    | dynein, light chain, Tctex-type 1                         | Multiple_Complex |
| TC0700007361.hg.1    | 6.45  | 7.11  | -1.58 | 2.59E-05 | 0.0002 UBE2D4    | ubiquitin-conjugating enzyme E2D 4 (putative              | Multiple_Complex |
| TC1700006758.hg.1    | 10    | 10.86 | -1.82 | 2.60E-05 | 0.0002 MPDU1     | mannose-P-dolichol utilization defect 1                   | Multiple_Complex |
| TC1600009530.hg.1    | 9.91  | 10.97 | -2.09 | 2.60E-05 | 0.0002 KIAA0430; | KIAA0430; microRNA 6506                                   | Multiple_Complex |
| TC1000010411.hg.1    | 7.45  | 8.17  | -1.65 | 2.61E-05 | 0.0002 ZNF33B    | zinc finger protein 33B                                   | Multiple_Complex |
| TC1100011190.hg.1    | 10.3  | 9.8   | 1.41  | 2.61E-05 | 0.0002 EHD1      | EH domain containing 1                                    | Multiple_Complex |
| TC0100016129.hg.1    | 10.23 | 9.57  | 1.57  | 2.62E-05 | 0.0002 COPA      | coatomer protein complex subunit alpha                    | Multiple_Complex |
| TC1100011888.hg.1    | 11.22 | 12.61 | -2.62 | 2.63E-05 | 0.0002 CTSC      | cathepsin C                                               | Multiple_Complex |
| TC0400011705.hg.1    | 6.86  | 6.02  | 1.8   | 2.63E-05 | 0.0002 C4orf3    | chromosome 4 open reading frame 3                         | Multiple_Complex |
| TSUnmapped00000459.h | 7.39  | 6.43  | 1.95  | 2.64E-05 | 0.0002 TRAPPC4   | trafficking protein particle complex 4                    | Coding           |
| TC1000009508.hg.1    | 5.51  | 4.87  | 1.56  | 2.67E-05 | 0.0002 TUBB8     | tubulin, beta 8 class VIII                                | Multiple_Complex |
| TC1100013005.hg.1    | 9.7   | 9.17  | 1.44  | 2.67E-05 | 0.0002 ZFP91     | ZFP91 zinc finger protein                                 | Multiple_Complex |
| TC0300009337.hg.1    | 9.46  | 10.49 | -2.03 | 2.68E-05 | 0.0002 SMC4      | structural maintenance of chromosomes 4                   | Multiple_Complex |
| TC0400009048.hg.1    | 11.4  | 9.04  | 5.13  | 2.68E-05 | 0.0002 TLR2      | toll-like receptor 2                                      | Multiple_Complex |
| TC1000007226.hg.1    | 9.17  | 7.57  | 3.02  | 2.68E-05 | 0.0002 CCDC7     | coiled-coil domain containing 7                           | Multiple_Complex |
| TC1500009984.hg.1    | 11.55 | 10.4  | 2.22  | 2.69E-05 | 0.0002 NPNT      | neuroplastin                                              | Multiple_Complex |
| TC1600007448.hg.1    | 15.16 | 17.1  | -3.84 | 2.69E-05 | 0.0002 CORO1A    | coronin, actin binding protein, 1A                        | Multiple_Complex |
| TC0700006603.hg.1    | 6.3   | 6.99  | -1.62 | 2.70E-05 | 0.0002 FOXK1     | forkhead box K1                                           | Multiple_Complex |
| TC1100011010.hg.1    | 5.92  | 6.85  | -1.91 | 2.70E-05 | 0.0002 PRPF19    | pre-mRNA processing factor 19                             | Multiple_Complex |
| TC0X00009986.hg.1    | 4.75  | 5.4   | -1.57 | 2.71E-05 | 0.0002 RP5-1091N | Transcript Identified by AceView, Entrez Gene             | NonCoding        |
| TC1000008315.hg.1    | 5.11  | 6.28  | -2.25 | 2.71E-05 | 0.0002 BMPRIA    | bone morphogenetic protein receptor type IA               | Multiple_Complex |
| TC0400009458.hg.1    | 6.23  | 7.13  | -1.88 | 2.72E-05 | 0.0002 CDKN2AIP  | CDKN2A interacting protein                                | Multiple_Complex |
| TC0800011000.hg.1    | 5.1   | 4.42  | 1.6   | 2.72E-05 | 0.0002 REXO1L1P; | REX1, RNA exonuclease 1 homolog-like 1, pse               | Multiple_Complex |
| TC0100015971.hg.1    | 13.7  | 14.53 | -1.77 | 2.73E-05 | 0.0002 GON4L     | gon-4-like (C. elegans)                                   | Multiple_Complex |
| TC0500013130.hg.1    | 6.47  | 7.26  | -1.73 | 2.74E-05 | 0.0002 TRIM52    | tripartite motif containing 52                            | Multiple_Complex |
| TC0400008335.hg.1    | 8.26  | 7.08  | 2.27  | 2.75E-05 | 0.0002 AIMP1     | aminoacyl tRNA synthetase complex-interacti               | Multiple_Complex |
| TC1600007392.hg.1    | 7.75  | 8.7   | -1.94 | 2.75E-05 | 0.0002 SNX29P2;  | S sorting nexin 29 pseudogene 2; sorting nexin            | Multiple_Complex |
| TC1700012457.hg.1    | 4.64  | 5.71  | -2.1  | 2.76E-05 | 0.0002 AXIN2     | axin 2                                                    | Multiple_Complex |
| TC1500008995.hg.1    | 8.67  | 10.11 | -2.73 | 2.77E-05 | 0.0002 GOLGA8B   | golgin A8 family, member B                                | Multiple_Complex |
| TC0200013308.hg.1    | 6.48  | 7.54  | -2.08 | 2.77E-05 | 0.0002 IMMT      | inner membrane protein, mitochondrial                     | Multiple_Complex |
| TC1100010739.hg.1    | 6.31  | 5.64  | 1.59  | 2.79E-05 | 0.0002 RAPSN     | receptor-associated protein of the synapse                | Multiple_Complex |
| TC1800007080.hg.1    | 7.34  | 6.63  | 1.64  | 2.79E-05 | 0.0002 GALNT1    | polypeptide N-acetylgalactosaminyltransferas              | Multiple_Complex |
| TC0400006812.hg.1    | 5.89  | 5.07  | 1.77  | 2.79E-05 | 0.0002 USP17L24; | USP17L24; ubiquitin specific peptidase 17-like family mer | Coding           |
| TC0400006814.hg.1    | 5.89  | 5.07  | 1.77  | 2.79E-05 | 0.0002 USP17L25; | USP17L25; ubiquitin specific peptidase 17-like family mer | Coding           |
| TC2200008103.hg.1    | 5.88  | 6.62  | -1.67 | 2.83E-05 | 0.0002 YPEL1     | yippee like 1                                             | Multiple_Complex |
| TC1700009277.hg.1    | 6.48  | 7.34  | -1.82 | 2.85E-05 | 0.0002 TBCD      | tubulin folding cofactor D                                | Multiple_Complex |
| TC0900012181.hg.1    | 5.81  | 6.59  | -1.72 | 2.87E-05 | 0.0002 NUP188    | nucleoporin 188kDa                                        | Multiple_Complex |
| TC1000010930.hg.1    | 4.83  | 5.68  | -1.81 | 2.87E-05 | 0.0002 PCBD1     | pterin-4 alpha-carbinolamine dehydratase/dir              | Multiple_Complex |
| TC0500007494.hg.1    | 4.55  | 3.95  | 1.52  | 2.89E-05 | 0.0002 RAB3C     | RAB3C, member RAS oncogene family                         | Multiple_Complex |
| TC0500007115.hg.1    | 7.96  | 6.97  | 1.98  | 2.89E-05 | 0.0002 RAI14     | Transcript Identified by AceView, Entrez Gene             | Unassigned       |
| TC0100010197.hg.1    | 6.61  | 6     | 1.52  | 2.90E-05 | 0.0002 PEAR1     | platelet endothelial aggregation receptor 1               | Multiple_Complex |
| TC2000008721.hg.1    | 11.51 | 9.84  | 3.18  | 2.90E-05 | 0.0002 APMAP     | adipocyte plasma membrane associated prote                | Multiple_Complex |
| TC0200007717.hg.1    | 9.13  | 10.47 | -2.53 | 2.90E-05 | 0.0002 AHS2      | AHA1, activator of heat shock 90kDa protein               | Multiple_Complex |
| TC1200010566.hg.1    | 8.96  | 9.77  | -1.75 | 2.90E-05 | 0.0002 SENP1     | SUMO1/sentrin specific peptidase 1                        | Multiple_Complex |
| TC1200009071.hg.1    | 5.9   | 6.72  | -1.77 | 2.91E-05 | 0.0002 PEBP1     | phosphatidylethanolamine binding protein 1                | Multiple_Complex |
| TC0100017836.hg.1    | 15.06 | 13.85 | 2.32  | 2.91E-05 | 0.0002 LYST      | lysosomal trafficking regulator                           | Multiple_Complex |
| TC0800009673.hg.1    | 7.3   | 6.31  | 2     | 2.94E-05 | 0.0002 LONRF1    | LON peptidase N-terminal domain and ring fin              | Multiple_Complex |
| TC0500009353.hg.1    | 7.34  | 6.34  | 2     | 2.95E-05 | 0.0002 RARS      | arginyl-tRNA synthetase                                   | Multiple_Complex |
| TC1800007667.hg.1    | 6.63  | 7.41  | -1.71 | 2.96E-05 | 0.0002 TIMM21    | translocase of inner mitochondrial membrane               | Multiple_Complex |
| TC0100015747.hg.1    | 6.78  | 7.55  | -1.7  | 2.96E-05 | 0.0002 GOLPH3L   | golgi phosphoprotein 3-like                               | Multiple_Complex |
| TC0800007459.hg.1    | 6.89  | 7.47  | -1.49 | 2.96E-05 | 0.0002 POMK      | protein-O-mannose kinase                                  | Multiple_Complex |
| TC0400011207.hg.1    | 6.69  | 7.52  | -1.78 | 2.97E-05 | 0.0002 HELQ      | helicase, POLQ-like                                       | Multiple_Complex |
| TC0300014001.hg.1    | 6.81  | 7.89  | -2.1  | 2.97E-05 | 0.0002 RFT1      | RFT1 homolog                                              | Multiple_Complex |
| TC1200012199.hg.1    | 9.82  | 8.46  | 2.57  | 2.98E-05 | 0.0002 CAMKK2    | calcium/calmodulin-dependent protein kinase               | Multiple_Complex |
| TC0500007927.hg.1    | 4.19  | 5.14  | -1.93 | 2.98E-05 | 0.0002 RASGRF2   | Jeck2013 ALT_ACCEPTOR, ALT_DONOR, codin                   | NonCoding        |
| TC0900009825.hg.1    | 9.75  | 11.98 | -4.7  | 2.98E-05 | 0.0002 DDX58     | DEAD (Asp-Glu-Ala-Asp) box polypeptide 58                 | Multiple_Complex |
| TSUnmapped00000056.h | 7.09  | 6.2   | 1.86  | 2.98E-05 | 0.0002 TRAPPC4   | trafficking protein particle complex 4                    | Coding           |
| TC0200006674.hg.1    | 8.44  | 7.64  | 1.73  | 3.02E-05 | 0.0002 KLF11     | Kruppel-like factor 11                                    | Multiple_Complex |
| TC0100010926.hg.1    | 6.75  | 8.15  | -2.62 | 3.05E-05 | 0.0002 OCLM      | Transcript Identified by AceView, Entrez Gene             | Unassigned       |
| TC0200013772.hg.1    | 8.28  | 7.42  | 1.82  | 3.05E-05 | 0.0002 RGPD3     | RANBP2-like and GRIP domain containing 3                  | Coding           |
| TSUnmapped00000075.h | 5.12  | 6.13  | -2.02 | 3.06E-05 | 0.0002 ZNF780A   | zinc finger protein 780A                                  | Coding           |
| TC0100015598.hg.1    | 17.83 | 18.58 | -1.68 | 3.06E-05 | 0.0002 TXNIP     | thioredoxin interacting protein                           | Multiple_Complex |
| TC1900009479.hg.1    | 6.51  | 5.99  | 1.43  | 3.07E-05 | 0.0002 PEX11G    | peroxisomal biogenesis factor 11 gamma                    | Multiple_Complex |
| TC1900011132.hg.1    | 5.11  | 5.9   | -1.74 | 3.07E-05 | 0.0002 SLC6A16   | solute carrier family 6, member 16                        | Multiple_Complex |

|                      |       |       |       |          |        |           |                                                                                                 |                  |
|----------------------|-------|-------|-------|----------|--------|-----------|-------------------------------------------------------------------------------------------------|------------------|
| TC0100011855.hg.1    | 10.01 | 11.73 | -3.3  | 3.07E-05 | 0.0002 | GUK1      | guanylate kinase 1                                                                              | Multiple_Complex |
| TSUnmapped00000494.h | 9.11  | 8.23  | 1.85  | 3.08E-05 | 0.0002 | ZDHC3     | zinc finger, DHHC-type containing 3                                                             | Coding           |
| TC100006434.hg.1     | 6.7   | 7.96  | -2.39 | 3.09E-05 | 0.0002 | ZMYND11   | zinc finger, MYND-type containing 11                                                            | Multiple_Complex |
| TC020008260.hg.1     | 7.91  | 7.06  | 1.81  | 3.09E-05 | 0.0002 | VAMP8     | vesicle associated membrane protein 8                                                           | Multiple_Complex |
| TC0400010688.hg.1    | 5.64  | 6.41  | -1.7  | 3.09E-05 | 0.0002 | USP46     | ubiquitin specific peptidase 46                                                                 | Multiple_Complex |
| TC0X00010331.hg.1    | 5.63  | 4.66  | 1.95  | 3.09E-05 | 0.0002 | SYTL4     | synaptotagmin-like 4                                                                            | Multiple_Complex |
| TC1100007978.hg.1    | 11.55 | 12.39 | -1.79 | 3.09E-05 | 0.0002 | MEN1      | Jeck2013 ANTISENSE, CDS, coding, INTERNAL                                                       | NonCoding        |
| TC0600014300.hg.1    | 7.42  | 8.23  | -1.76 | 3.09E-05 | 0.0002 | GCLC      | glutamate-cysteine ligase, catalytic subunit                                                    | Multiple_Complex |
| TC0900009458.hg.1    | 4.45  | 5.51  | -2.09 | 3.10E-05 | 0.0002 | RLN1      | relaxin 1                                                                                       | Multiple_Complex |
| TC1100010987.hg.1    | 7.17  | 6.42  | 1.68  | 3.10E-05 | 0.0002 | FABP5     | fatty acid binding protein 5 (psoriasis-associated)                                             | Multiple_Complex |
| TC1200012003.hg.1    | 7.74  | 8.3   | -1.48 | 3.10E-05 | 0.0002 | RBM19     | RNA binding motif protein 19                                                                    | Multiple_Complex |
| TC1700011298.hg.1    | 6.74  | 7.77  | -2.05 | 3.12E-05 | 0.0002 | TUBD1     | tubulin, delta 1                                                                                | Multiple_Complex |
| TC0600014123.hg.1    | 9.18  | 8.07  | 2.16  | 3.13E-05 | 0.0002 | NFYA      | nuclear transcription factor Y subunit alpha                                                    | Multiple_Complex |
| TC0900009932.hg.1    | 7.57  | 8.26  | -1.61 | 3.14E-05 | 0.0002 | STOML2    | stomatin (EPB72)-like 2                                                                         | Multiple_Complex |
| TC0100009944.hg.1    | 9.19  | 9.93  | -1.67 | 3.15E-05 | 0.0002 | PIP5K1A   | phosphatidylinositol-4-phosphate 5-kinase, type 1A                                              | Multiple_Complex |
| TC0100013692.hg.1    | 9.7   | 10.64 | -1.91 | 3.16E-05 | 0.0002 | KIAA0319L | KIAA0319-like                                                                                   | Multiple_Complex |
| TC0700009236.hg.1    | 7.13  | 6.06  | 2.11  | 3.21E-05 | 0.0002 | CALD1     | caldesmon 1                                                                                     | Multiple_Complex |
| TC0900012153.hg.1    | 6.53  | 5.9   | 1.55  | 3.21E-05 | 0.0002 | MSANTD3   | Myb/SANT-like DNA-binding domain containing 3                                                   | Multiple_Complex |
| TC0400011313.hg.1    | 11.52 | 13.69 | -4.51 | 3.21E-05 | 0.0002 | SNCA      | synuclein alpha                                                                                 | Multiple_Complex |
| TC0600007855.hg.1    | 7.77  | 8.78  | -2.01 | 3.21E-05 | 0.0002 | FGD2      | FYVE, RhoGEF and PH domain containing 2                                                         | Multiple_Complex |
| TC1400006970.hg.1    | 11.88 | 10.95 | 1.91  | 3.22E-05 | 0.0002 | PNN       | pinin, desmosome associated protein                                                             | Multiple_Complex |
| TC0200010443.hg.1    | 17.94 | 16.72 | 2.32  | 3.25E-05 | 0.0002 | CFLAR     | CASP8 and FADD like apoptosis regulator                                                         | Multiple_Complex |
| TC1900011632.hg.1    | 5.47  | 6.27  | -1.74 | 3.25E-05 | 0.0002 | ZBTB45    | zinc finger and BTB domain containing 45                                                        | Multiple_Complex |
| TC2200009194.hg.1    | 12.67 | 13.65 | -1.98 | 3.25E-05 | 0.0002 | MED15     | mediator complex subunit 15                                                                     | Multiple_Complex |
| TC0200011188.hg.1    | 5.06  | 6.13  | -2.09 | 3.26E-05 | 0.0002 | AGAP1     | ArfGAP with GTPase domain, ankyrin repeat a                                                     | Multiple_Complex |
| TC0X00010356.hg.1    | 9.19  | 8.29  | 1.86  | 3.27E-05 | 0.0002 | BTK       | Bruton agammaglobulinemia tyrosine kinase                                                       | Multiple_Complex |
| TC0100007660.hg.1    | 5.83  | 6.93  | -2.13 | 3.28E-05 | 0.0002 | TMEM39B   | transmembrane protein 39B                                                                       | Multiple_Complex |
| TC1000009092.hg.1    | 4.66  | 5.78  | -2.17 | 3.29E-05 | 0.0002 | INPP5F    | inositol polyphosphate-5-phosphatase F                                                          | Multiple_Complex |
| TC1300006658.hg.1    | 6.14  | 4.85  | 2.46  | 3.31E-05 | 0.0002 | WASF3     | WAS protein family, member 3                                                                    | Multiple_Complex |
| TC0600009370.hg.1    | 6.01  | 6.63  | -1.54 | 3.32E-05 | 0.0002 | TRMT11    | tRNA methyltransferase 11 homolog                                                               | Multiple_Complex |
| TC0100011406.hg.1    | 18.38 | 17.64 | 1.67  | 3.33E-05 | 0.0002 | CD55      | CD55 molecule, decay accelerating factor for complement                                         | Multiple_Complex |
| TC1600008330.hg.1    | 6.49  | 5.22  | 2.42  | 3.34E-05 | 0.0002 | HPR       | haptoglobin-related protein                                                                     | Multiple_Complex |
| TC1600008214.hg.1    | 4.53  | 5.09  | -1.48 | 3.34E-05 | 0.0002 | TANGO6    | transport and golgi organization 6 homolog                                                      | Multiple_Complex |
| TC1200011711.hg.1    | 8.84  | 9.97  | -2.19 | 3.34E-05 | 0.0002 | GNPTAB    | N-acetylglucosamine-1-phosphate transferase                                                     | Multiple_Complex |
| TC0900010910.hg.1    | 8.74  | 7.9   | 1.8   | 3.36E-05 | 0.0002 | SLC35D2   | solute carrier family 35 (UDP-GlcNAc/UDP-glucose) member 2                                      | Multiple_Complex |
| TC1100007184.hg.1    | 5.16  | 6.04  | -1.84 | 3.37E-05 | 0.0002 | DNAJC24   | DnaJ (Hsp40) homolog, subfamily C, member 24                                                    | Multiple_Complex |
| TC2000009648.hg.1    | 8.73  | 7.98  | 1.68  | 3.37E-05 | 0.0002 | PRELID3B  | PREL domain containing 3B; ATP synthase, H+ transporting, mitochondrial F1F0 complex, subunit c | Multiple_Complex |
| TC0300006477.hg.1    | 6.81  | 7.62  | -1.75 | 3.38E-05 | 0.0002 | ITPR1     | inositol 1,4,5-trisphosphate receptor, type 1                                                   | Multiple_Complex |
| TC1200007137.hg.1    | 9.57  | 8.38  | 2.27  | 3.38E-05 | 0.0002 | FGFR1OP2  | FGFR1 oncogene partner 2                                                                        | Multiple_Complex |
| TC1900011012.hg.1    | 6.97  | 7.64  | -1.59 | 3.39E-05 | 0.0002 | TMEM160   | transmembrane protein 160                                                                       | Multiple_Complex |
| TC0900008858.hg.1    | 3.74  | 4.29  | -1.46 | 3.40E-05 | 0.0002 | COQ4      | coenzyme Q4                                                                                     | Multiple_Complex |
| TC0100006707.hg.1    | 10.81 | 9.82  | 1.98  | 3.41E-05 | 0.0002 | CAMTA1    | calmodulin binding transcription activator 1                                                    | Multiple_Complex |
| TC0200010431.hg.1    | 6.18  | 6.99  | -1.75 | 3.43E-05 | 0.0002 | NIF3L1    | NIF3 NGG1 interacting factor 3-like 1                                                           | Multiple_Complex |
| TSUnmapped00000291.h | 7.57  | 6.96  | 1.52  | 3.43E-05 | 0.0002 | VPS11     | VPS11, CORVET/HOPS core subunit [Source:HGSC] [Evidence:0]                                      | Coding           |
| TC0700013550.hg.1    | 6.13  | 7.03  | -1.86 | 3.44E-05 | 0.0002 | URGCP; UR | upregulator of cell proliferation; URGCP-MRP5                                                   | Multiple_Complex |
| TC0200009548.hg.1    | 9.04  | 8.17  | 1.82  | 3.45E-05 | 0.0002 | ARHGAP15  | Rho GTPase activating protein 15                                                                | NonCoding        |
| TC0400012366.hg.1    | 8.46  | 11.57 | -8.62 | 3.46E-05 | 0.0002 | DDX60     | DEAD (Asp-Glu-Ala-Asp) box polypeptide 60                                                       | Multiple_Complex |
| TC0100009482.hg.1    | 8.55  | 7.22  | 2.51  | 3.46E-05 | 0.0002 | HIPK1     | Memczak2013 ALT_DONOR, coding, INTERNAL                                                         | NonCoding        |
| TC1100009048.hg.1    | 5.66  | 6.34  | -1.6  | 3.47E-05 | 0.0002 | DLAT      | dihydrolipoamide S-acetyltransferase                                                            | Multiple_Complex |
| TC2100008526.hg.1    | 5.59  | 4.82  | 1.71  | 3.47E-05 | 0.0002 | SLC37A1   | solute carrier family 37 (glucose-6-phosphate) member 1                                         | Multiple_Complex |
| TC0300012143.hg.1    | 7.41  | 8.33  | -1.89 | 3.47E-05 | 0.0002 | LRRC58    | leucine rich repeat containing 58                                                               | Multiple_Complex |
| TC0X00010366.hg.1    | 6.75  | 5.75  | 2.01  | 3.47E-05 | 0.0002 | ARMCX6    | armadillo repeat containing, X-linked 6                                                         | Multiple_Complex |
| TC1100008133.hg.1    | 8.03  | 8.93  | -1.86 | 3.48E-05 | 0.0002 | TBC1D10C  | TBC1 domain family, member 10C                                                                  | Multiple_Complex |
| TC0300011182.hg.1    | 7.73  | 8.63  | -1.87 | 3.49E-05 | 0.0002 | GLT8D1    | glycosyltransferase 8 domain containing 1                                                       | Multiple_Complex |
| TC0100015743.hg.1    | 9.8   | 8.73  | 2.09  | 3.52E-05 | 0.0002 | ENSA      | endosulfine alpha                                                                               | Multiple_Complex |
| TC0200007102.hg.1    | 8.87  | 7.88  | 1.98  | 3.52E-05 | 0.0002 | PLB1      | phospholipase B1                                                                                | Multiple_Complex |
| TC0700008252.hg.1    | 6.21  | 7.31  | -2.14 | 3.53E-05 | 0.0002 | CROT      | carnitine O-octanoyltransferase                                                                 | Multiple_Complex |
| TC1700011773.hg.1    | 12.44 | 13.81 | -2.6  | 3.55E-05 | 0.0002 | WBP2      | WW domain binding protein 2                                                                     | Multiple_Complex |
| TC0400006820.hg.1    | 4.65  | 3.95  | 1.62  | 3.55E-05 | 0.0002 | USP17L27  | ubiquitin specific peptidase 17-like family member 27                                           | Coding           |
| TC0400006822.hg.1    | 4.65  | 3.95  | 1.62  | 3.55E-05 | 0.0002 | USP17L28  | ubiquitin specific peptidase 17-like family member 28                                           | Coding           |
| TC0400006824.hg.1    | 4.65  | 3.95  | 1.62  | 3.55E-05 | 0.0002 | USP17L29  | ubiquitin specific peptidase 17-like family member 29                                           | Coding           |
| TC0400006828.hg.1    | 4.65  | 3.95  | 1.62  | 3.55E-05 | 0.0002 | USP17L25  | ubiquitin specific peptidase 17-like family member 25                                           | Coding           |
| TC0400007422.hg.1    | 6.06  | 7.02  | -1.95 | 3.55E-05 | 0.0002 | ATP10D    | ATPase, class V, type 10D                                                                       | Multiple_Complex |
| TC0200009223.hg.1    | 5.43  | 6.21  | -1.71 | 3.55E-05 | 0.0002 | SFT2D3    | SFT2 domain containing 3                                                                        | Coding           |
| TC1100007935.hg.1    | 8.49  | 9.23  | -1.67 | 3.56E-05 | 0.0002 | STIP1     | stress-induced phosphoprotein 1                                                                 | Multiple_Complex |
| TC0X00006603.hg.1    | 7.08  | 8.03  | -1.94 | 3.56E-05 | 0.0002 | HCCS      | holocytochrome c synthase                                                                       | Multiple_Complex |
| TC0400007399.hg.1    | 7.3   | 8.05  | -1.68 | 3.57E-05 | 0.0002 | GUF1      | GUF1 homolog, GTPase                                                                            | Multiple_Complex |
| TC0600012655.hg.1    | 10.8  | 9.7   | 2.15  | 3.57E-05 | 0.0002 | PNISR     | PNN-interacting serine/arginine-rich protein                                                    | Multiple_Complex |
| TC0300013602.hg.1    | 6.17  | 5.09  | 2.11  | 3.58E-05 | 0.0002 | ATP13A3   | Transcript Identified by AceView, Entrez Gene                                                   | Unassigned       |
| TC0100006822.hg.1    | 5.95  | 6.8   | -1.8  | 3.58E-05 | 0.0002 | PEX14     | peroxisomal biogenesis factor 14                                                                | Multiple_Complex |

|                      |       |       |       |          |                    |                                                              |                  |
|----------------------|-------|-------|-------|----------|--------------------|--------------------------------------------------------------|------------------|
| TC0400012949.hg.1    | 8.57  | 7.7   | 1.83  | 3.59E-05 | 0.0002 SLC39A8     | solute carrier family 39 (zinc transporter), member 1        | Multiple_Complex |
| TC1300009992.hg.1    | 5.92  | 6.82  | -1.87 | 3.59E-05 | 0.0002 BIVM-ERCC   | BIVM-ERCC5 readthrough                                       | Multiple_Complex |
| TC0400011383.hg.1    | 7.49  | 9.57  | -4.22 | 3.63E-05 | 0.0002 TSPAN5      | tetraspanin 5                                                | Multiple_Complex |
| TC1700011795.hg.1    | 6.16  | 7.06  | -1.87 | 3.64E-05 | 0.0002 PRPSAP1     | phosphoribosyl pyrophosphate synthetase-ase                  | Multiple_Complex |
| TC1300008091.hg.1    | 5.56  | 6.68  | -2.18 | 3.65E-05 | 0.0002 ATP11A      | Transcript Identified by AceView, Entrez Gene                | Unassigned       |
| TC1900008292.hg.1    | 5.88  | 6.57  | -1.61 | 3.65E-05 | 0.0002 TOMM40      | translocase of outer mitochondrial membrane                  | Multiple_Complex |
| TC1900008927.hg.1    | 7.38  | 8.03  | -1.56 | 3.67E-05 | 0.0002 EPN1        | epsin 1                                                      | Multiple_Complex |
| TC2000009959.hg.1    | 10.61 | 11.6  | -2    | 3.69E-05 | 0.0002 CSNK2A1     | casein kinase 2, alpha 1 polypeptide                         | Multiple_Complex |
| TSUnmapped00000592.h | 4.63  | 3.82  | 1.76  | 3.69E-05 | 0.0002 FMN1        | formin 1                                                     | Coding           |
| TC0200012219.hg.1    | 5.64  | 6.61  | -1.96 | 3.70E-05 | 0.0002 FAM98A      | family with sequence similarity 98, member A                 | Multiple_Complex |
| TC0300011108.hg.1    | 4.96  | 5.68  | -1.65 | 3.70E-05 | 0.0002 NPR12       | NPR2-like, GATOR1 complex subunit                            | Multiple_Complex |
| TC0400012551.hg.1    | 8.22  | 8.95  | -1.65 | 3.70E-05 | 0.0002 DCLT        | dCMP deaminase                                               | Multiple_Complex |
| TC1100013082.hg.1    | 6.24  | 4.95  | 2.44  | 3.72E-05 | 0.0002 PIWIL4      | piwi-like RNA-mediated gene silencing 4                      | Multiple_Complex |
| TC1500010244.hg.1    | 5.15  | 4.56  | 1.5   | 3.72E-05 | 0.0002 AP3B2       | adaptor-related protein complex 3, beta 2 subunit            | Multiple_Complex |
| TC1100007800.hg.1    | 7.85  | 8.51  | -1.58 | 3.73E-05 | 0.0002 TKFC        | triokinase/FMN cyclase                                       | Multiple_Complex |
| TC1100008447.hg.1    | 6.28  | 6.98  | -1.63 | 3.73E-05 | 0.0002 SPCS2       | signal peptidase complex subunit 2                           | Multiple_Complex |
| TC0100013723.hg.1    | 8.59  | 7.71  | 1.84  | 3.74E-05 | 0.0002 MRPS15      | mitochondrial ribosomal protein S15                          | Multiple_Complex |
| TC1300009271.hg.1    | 6.34  | 6.98  | -1.56 | 3.75E-05 | 0.0002 TBC1D4      | TBC1 domain family, member 4                                 | Multiple_Complex |
| TC0100012089.hg.1    | 7.68  | 8.81  | -2.19 | 3.75E-05 | 0.0002 GPR137B     | G protein-coupled receptor 137B                              | Multiple_Complex |
| TC1800006650.hg.1    | 15.11 | 13.08 | 4.08  | 3.76E-05 | 0.0002 RAB31       | RAB31, member RAS oncogene family                            | Multiple_Complex |
| TC0600014282.hg.1    | 13.39 | 10.66 | 6.61  | 3.77E-05 | 0.0002 RPS10       | ribosomal protein S10                                        | Multiple_Complex |
| TSUnmapped00000469.h | 6.31  | 5.23  | 2.11  | 3.78E-05 | 0.0002 INPP5D      | inositol polyphosphate-5-phosphatase D                       | Coding           |
| TC0200009920.hg.1    | 10.34 | 8.61  | 3.32  | 3.79E-05 | 0.0002 SSB         | Sjogren syndrome antigen B (autoantigen La)                  | Multiple_Complex |
| TC1700012460.hg.1    | 7.63  | 8.6   | -1.95 | 3.80E-05 | 0.0002 ABCA5       | ATP binding cassette subfamily A member 5                    | Multiple_Complex |
| TC0500007163.hg.1    | 10.24 | 11.15 | -1.88 | 3.80E-05 | 0.0002 NIPBL       | Nipped-B homolog (Drosophila)                                | Multiple_Complex |
| TC1900011084.hg.1    | 7.54  | 8.49  | -1.94 | 3.82E-05 | 0.0002 DBP         | D site of albumin promoter (albumin D-box) binding protein   | Multiple_Complex |
| TC0100006991.hg.1    | 7.95  | 8.58  | -1.55 | 3.82E-05 | 0.0002 RSC1A1; D1  | regulatory solute carrier protein, family 1, member 1        | Multiple_Complex |
| TC0300010240.hg.1    | 7.43  | 6.81  | 1.53  | 3.83E-05 | 0.0002 SEC13       | SEC13 homolog, nuclear pore and COPII coat component         | Multiple_Complex |
| TC0100014775.hg.1    | 9.98  | 9.38  | 1.52  | 3.83E-05 | 0.0002 BCL10       | B-cell CLL/lymphoma 10                                       | Coding           |
| TC1700011652.hg.1    | 5.58  | 6.32  | -1.68 | 3.84E-05 | 0.0002 FAM104A     | family with sequence similarity 104, member 1                | Multiple_Complex |
| TC0600009350.hg.1    | 6.52  | 5.52  | 1.99  | 3.84E-05 | 0.0002 RNF217      | ring finger protein 217                                      | Multiple_Complex |
| TC1900009583.hg.1    | 7.21  | 8.06  | -1.8  | 3.84E-05 | 0.0002 ZNF266      | zinc finger protein 266                                      | Multiple_Complex |
| TC0300010358.hg.1    | 7.83  | 8.71  | -1.84 | 3.89E-05 | 0.0002 XPC         | xeroderma pigmentosum, complementation group C               | Multiple_Complex |
| TC1200008107.hg.1    | 14.09 | 12.93 | 2.25  | 3.89E-05 | 0.0002 RAP1B       | RAP1B, member of RAS oncogene family                         | Multiple_Complex |
| TC0200016676.hg.1    | 5.12  | 5.98  | -1.82 | 3.90E-05 | 0.0002 WDPCP       | WD repeat containing planar cell polarity effector           | Multiple_Complex |
| TC0300007512.hg.1    | 12.3  | 11.13 | 2.25  | 3.92E-05 | 0.0002 PRKCD       | protein kinase C, delta                                      | Multiple_Complex |
| TSUnmapped00000208.h | 5.19  | 6.13  | -1.92 | 3.94E-05 | 0.0002 ZDHHC3      | zinc finger, DHHC-type containing 3                          | NonCoding        |
| TC1600009102.hg.1    | 8.96  | 9.87  | -1.87 | 3.95E-05 | 0.0002 RNPS1       | RNA binding protein S1, serine-rich domain                   | Multiple_Complex |
| TSUnmapped00000351.h | 5.75  | 6.58  | -1.79 | 3.96E-05 | 0.0002 VPS11       | VPS11, CORVET/HOPS core subunit [Source:HGSC] [Evidence:ECO] | NonCoding        |
| TC0300011423.hg.1    | 6.48  | 7.42  | -1.93 | 3.99E-05 | 0.0002 LRIG1       | leucine-rich repeats and immunoglobulin-like domains         | Multiple_Complex |
| TC0400007330.hg.1    | 6.91  | 5.42  | 2.8   | 4.00E-05 | 0.0002 NSUN7       | NOP2/Sun domain family, member 7                             | Multiple_Complex |
| TC1700012039.hg.1    | 7.29  | 6.27  | 2.02  | 4.01E-05 | 0.0002 LOC10013370 | uncharacterized LOC100133070; novel transcript               | Multiple_Complex |
| TC1500008986.hg.1    | 5.26  | 6.09  | -1.78 | 4.01E-05 | 0.0002 LPCAT4      | lysophosphatidylcholine acyltransferase 4                    | Multiple_Complex |
| TC0800011561.hg.1    | 12.23 | 13.42 | -2.27 | 4.02E-05 | 0.0002 EIF3H       | eukaryotic translation initiation factor 3, subunit H        | Multiple_Complex |
| TC0100015790.hg.1    | 5.49  | 4.9   | 1.5   | 4.03E-05 | 0.0002 POGZ        | Transcript Identified by AceView, Entrez Gene                | Unassigned       |
| TC1300008267.hg.1    | 7.51  | 8.55  | -2.07 | 4.04E-05 | 0.0002 XPO4        | exportin 4                                                   | Multiple_Complex |
| TC1900007270.hg.1    | 11.24 | 12.95 | -3.27 | 4.04E-05 | 0.0002 KLF2        | Kruppel-like factor 2                                        | Coding           |
| TC1900009850.hg.1    | 6.7   | 5.84  | 1.82  | 4.05E-05 | 0.0003 SLC1A6      | solute carrier family 1 (high affinity aspartate/glutamate)  | Multiple_Complex |
| TC0800012393.hg.1    | 5.47  | 4.58  | 1.85  | 4.06E-05 | 0.0003 ADRA1A      | adrenoceptor alpha 1A                                        | Multiple_Complex |
| TC0100014050.hg.1    | 7.94  | 8.63  | -1.61 | 4.07E-05 | 0.0003 LRRC41      | leucine rich repeat containing 41                            | Multiple_Complex |
| TC0800007245.hg.1    | 6.17  | 7.06  | -1.86 | 4.07E-05 | 0.0003 MAK16       | MAK16 homolog                                                | Multiple_Complex |
| TC0200007722.hg.1    | 8.2   | 6.7   | 2.83  | 4.07E-05 | 0.0003 USP34       | Memczak2013 ANTISENSE, CDS, coding, INTF                     | NonCoding        |
| TC1600008942.hg.1    | 6.5   | 5.63  | 1.83  | 4.08E-05 | 0.0003 MRPL28      | mitochondrial ribosomal protein L28                          | Multiple_Complex |
| TC0200010796.hg.1    | 8.95  | 10.01 | -2.09 | 4.10E-05 | 0.0003 CTDSP1      | CTD small phosphatase 1                                      | Multiple_Complex |
| TC2000008909.hg.1    | 9.96  | 9.24  | 1.65  | 4.11E-05 | 0.0003 EIF2S2      | eukaryotic translation initiation factor 2, subunit 2        | Multiple_Complex |
| TC0X00009549.hg.1    | 6.91  | 7.95  | -2.06 | 4.13E-05 | 0.0003 NDUFB11     | NADH dehydrogenase (ubiquinone) 1 beta subunit               | Multiple_Complex |
| TC0500008919.hg.1    | 8.29  | 9.11  | -1.76 | 4.14E-05 | 0.0003 RNF14       | ring finger protein 14                                       | Multiple_Complex |
| TC1200006640.hg.1    | 5.15  | 5.88  | -1.66 | 4.16E-05 | 0.0003 COPS7A      | COP9 signalosome subunit 7A                                  | Multiple_Complex |
| TC2000006464.hg.1    | 7.18  | 8.27  | -2.14 | 4.17E-05 | 0.0003 FAM110A     | family with sequence similarity 110, member 1                | Multiple_Complex |
| TC0500012057.hg.1    | 8.37  | 9.26  | -1.85 | 4.17E-05 | 0.0003 C5orf15     | chromosome 5 open reading frame 15                           | Multiple_Complex |
| TC0100010078.hg.1    | 9.79  | 11.38 | -3    | 4.18E-05 | 0.0003 IL6R        | interleukin 6 receptor                                       | Multiple_Complex |
| TC1600010244.hg.1    | 4.58  | 3.99  | 1.51  | 4.21E-05 | 0.0003 ZNF423      | zinc finger protein 423                                      | Multiple_Complex |
| TC0400007799.hg.1    | 4.53  | 5.33  | -1.74 | 4.21E-05 | 0.0003 SLC4A4      | solute carrier family 4 (sodium bicarbonate cotransporter)   | Multiple_Complex |
| TC0200010907.hg.1    | 8.76  | 7.73  | 2.04  | 4.21E-05 | 0.0003 ACSL3       | acyl-CoA synthetase long-chain family member 3               | Multiple_Complex |
| TC1100013221.hg.1    | 11.6  | 10.2  | 2.63  | 4.22E-05 | 0.0003 CASP1       | caspace 1                                                    | Multiple_Complex |
| TC1900007950.hg.1    | 5.74  | 6.96  | -2.33 | 4.24E-05 | 0.0003 ZNF567      | zinc finger protein 567                                      | Multiple_Complex |
| TC1900009433.hg.1    | 7.29  | 6.51  | 1.72  | 4.25E-05 | 0.0003 TUBB4A      | tubulin, beta 4A class IVa                                   | Coding           |
| TC1100008518.hg.1    | 7.82  | 6.93  | 1.86  | 4.25E-05 | 0.0003 ACER3       | alkaline ceramidase 3                                        | Multiple_Complex |
| TSUnmapped00000282.h | 7.03  | 8.11  | -2.11 | 4.28E-05 | 0.0003 KAT6B       | K(lysine) acetyltransferase 6B                               | Coding           |
| TC1600009422.hg.1    | 9.78  | 11.59 | -3.52 | 4.30E-05 | 0.0003 GSPT1       | G1 to S phase transition 1                                   | Multiple_Complex |

|                      |       |       |       |          |                   |                                                 |                  |
|----------------------|-------|-------|-------|----------|-------------------|-------------------------------------------------|------------------|
| TC0400010768.hg.1    | 4.69  | 5.65  | -1.96 | 4.30E-05 | 0.0003 AASDH      | aminoadipate-semialdehyde dehydrogenase         | Multiple_Complex |
| TC2200007309.hg.1    | 9.35  | 10.43 | -2.11 | 4.30E-05 | 0.0003 SH3BP1; PC | SH3-domain binding protein 1; pyridoxal (pyri   | Multiple_Complex |
| TC0100014806.hg.1    | 12.61 | 11.49 | 2.19  | 4.31E-05 | 0.0003 15-Sep     | 15 kDa selenoprotein; Salzman2013 ANNOTA1       | Multiple_Complex |
| TC1900011936.hg.1    | 4     | 4.71  | -1.63 | 4.31E-05 | 0.0003 ZNF781     | zinc finger protein 781                         | Multiple_Complex |
| TC1200007895.hg.1    | 13.43 | 12.42 | 2.02  | 4.31E-05 | 0.0003 OS9        | osteosarcoma amplified 9, endoplasmic reticu    | Multiple_Complex |
| TC0100010510.hg.1    | 8.07  | 8.82  | -1.68 | 4.32E-05 | 0.0003 RCSD1      | RCSD domain containing 1                        | Multiple_Complex |
| TC1500010720.hg.1    | 4.84  | 5.59  | -1.68 | 4.32E-05 | 0.0003 IVD        | isovaleryl-CoA dehydrogenase                    | Multiple_Complex |
| TC1900012036.hg.1    | 10.27 | 9.02  | 2.38  | 4.34E-05 | 0.0003 LILRB3     | leukocyte immunoglobulin-like receptor, subf    | Multiple_Complex |
| TC0900012197.hg.1    | 5.3   | 6.35  | -2.07 | 4.34E-05 | 0.0003 PTGDS      | prostaglandin D2 synthase 21kDa (brain)         | Multiple_Complex |
| TC0X00007107.hg.1    | 5.26  | 6.2   | -1.92 | 4.36E-05 | 0.0003 KRBOX4     | KRAB box domain containing 4                    | Multiple_Complex |
| TC1600009198.hg.1    | 5.78  | 6.57  | -1.72 | 4.38E-05 | 0.0003 NLRC5      | NLR family, CARD domain containing 3            | Multiple_Complex |
| TC2000009986.hg.1    | 8.93  | 9.65  | -1.64 | 4.39E-05 | 0.0003 SNX5       | sorting nexin 5                                 | Multiple_Complex |
| TC0900012209.hg.1    | 7.25  | 8.24  | -1.99 | 4.40E-05 | 0.0003 TTC39B     | tetratricopeptide repeat domain 39B             | Multiple_Complex |
| TC1000006907.hg.1    | 8.88  | 9.82  | -1.92 | 4.44E-05 | 0.0003 STAM       | Memczak2013 ALT_ACCEPTOR, ALT_DONOR,            | NonCoding        |
| TC0200011075.hg.1    | 14.86 | 16.04 | -2.26 | 4.46E-05 | 0.0003 PTMA       | prothymosin, alpha                              | Multiple_Complex |
| TC0100014392.hg.1    | 9.04  | 9.74  | -1.63 | 4.46E-05 | 0.0003 TM2D1      | TM2 domain containing 1                         | Multiple_Complex |
| TC0700008809.hg.1    | 6.4   | 7.67  | -2.42 | 4.46E-05 | 0.0003 LRRN3      | leucine rich repeat neuronal 3                  | Multiple_Complex |
| TC1900011667.hg.1    | 7.54  | 8.4   | -1.82 | 4.49E-05 | 0.0003 ZNF700     | zinc finger protein 700                         | Multiple_Complex |
| TC0600008092.hg.1    | 6.87  | 7.71  | -1.79 | 4.51E-05 | 0.0003 TJAP1      | tight junction associated protein 1 (peripheral | Multiple_Complex |
| TSUnmapped00000524.h | 5.66  | 6.66  | -2    | 4.52E-05 | 0.0003 INPP5D     | inositol polyphosphate-5-phosphatase D          | Coding           |
| TC2200009277.hg.1    | 4.51  | 5.66  | -2.21 | 4.53E-05 | 0.0003 XPNPEP3    | X-prolyl aminopeptidase 3, mitochondrial        | Multiple_Complex |
| TC1000008668.hg.1    | 6.5   | 7.64  | -2.19 | 4.54E-05 | 0.0003 SFXN3      | sideroflexin 3                                  | Multiple_Complex |
| TC1900011642.hg.1    | 6.44  | 7.09  | -1.56 | 4.55E-05 | 0.0003 SPPL2B     | signal peptide peptidase like 2B                | Multiple_Complex |
| TC2200009285.hg.1    | 4.7   | 5.57  | -1.82 | 4.55E-05 | 0.0003 PRR5-ARHC  | PRR5-ARHGAP8 readthrough                        | Multiple_Complex |
| TC0600008697.hg.1    | 7.33  | 8.97  | -3.12 | 4.55E-05 | 0.0003 NT5E       | 5-nucleotidase, ecto (CD73)                     | Multiple_Complex |
| TC1200010699.hg.1    | 5.9   | 6.73  | -1.78 | 4.55E-05 | 0.0003 POU6F1     | POU class 6 homeobox 1                          | Multiple_Complex |
| TC0900008967.hg.1    | 5.33  | 6.06  | -1.65 | 4.56E-05 | 0.0003 EXOSC2     | exosome component 2                             | Multiple_Complex |
| TC0300006582.hg.1    | 6.61  | 7.57  | -1.94 | 4.58E-05 | 0.0003 TATDN2; G  | TatD DNase domain containing 2; ghrelin oppo    | Multiple_Complex |
| TC0900011837.hg.1    | 4.44  | 3.76  | 1.6   | 4.59E-05 | 0.0003 ABO        | ABO blood group (transferase A, alpha 1-3-N-g   | Multiple_Complex |
| TC1500010729.hg.1    | 11.68 | 10.52 | 2.24  | 4.61E-05 | 0.0003 SERF2      | small EDRK-rich factor 2                        | Multiple_Complex |
| TC1900011968.hg.1    | 8.25  | 9.06  | -1.75 | 4.66E-05 | 0.0003 XRCC1      | X-ray repair complementing defective repair ii  | Multiple_Complex |
| TC0200008094.hg.1    | 4.98  | 5.69  | -1.63 | 4.67E-05 | 0.0003 SEMA4F     | sema domain, immunoglobulin domain (Ig), tr     | Multiple_Complex |
| TC0200016416.hg.1    | 7.9   | 8.59  | -1.62 | 4.67E-05 | 0.0003 SLC35F6    | solute carrier family 35, member F6             | Multiple_Complex |
| TC1100007922.hg.1    | 6.04  | 6.82  | -1.72 | 4.68E-05 | 0.0003 NAAA40     | N(alpha)-acetyltransferase 40, NatD catalytic   | Multiple_Complex |
| TC0700009585.hg.1    | 7.85  | 9.08  | -2.35 | 4.69E-05 | 0.0003 CUL1       | cullin 1                                        | Multiple_Complex |
| TC1600011330.hg.1    | 14.18 | 15.64 | -2.74 | 4.70E-05 | 0.0003 ATP6VOC    | ATPase, H+ transporting, lysosomal 16kDa, VO    | Multiple_Complex |
| TC1200009587.hg.1    | 5.82  | 6.61  | -1.72 | 4.71E-05 | 0.0003 CACNA2D4   | calcium channel, voltage-dependent, alpha 2/    | Multiple_Complex |
| TC0100012889.hg.1    | 7.41  | 6.99  | 1.34  | 4.72E-05 | 0.0003 MAD2L2     | MAD2 mitotic arrest deficient-like 2 (yeast)    | Multiple_Complex |
| TC0300006596.hg.1    | 5.69  | 4.87  | 1.76  | 4.72E-05 | 0.0003 SLC6A11    | solute carrier family 6 (neurotransmitter trans | Multiple_Complex |
| TC1700010248.hg.1    | 8.1   | 8.83  | -1.66 | 4.73E-05 | 0.0003 GIT1       | G protein-coupled receptor kinase interacting   | Multiple_Complex |
| TC1900007003.hg.1    | 7.88  | 9.03  | -2.22 | 4.75E-05 | 0.0003 CARM1      | coactivator-associated arginine methyltransfe   | Multiple_Complex |
| TC1900007319.hg.1    | 6.84  | 7.61  | -1.7  | 4.75E-05 | 0.0003 MRPL34     | mitochondrial ribosomal protein L34             | Multiple_Complex |
| TC0300013859.hg.1    | 4.85  | 6.15  | -2.45 | 4.76E-05 | 0.0003 CD200      | CD200 molecule                                  | Multiple_Complex |
| TSUnmapped00000206.h | 6.03  | 6.68  | -1.56 | 4.82E-05 | 0.0003 ZNF780B    | zinc finger protein 780B                        | NonCoding        |
| TC0400011518.hg.1    | 9.17  | 7.86  | 2.48  | 4.82E-05 | 0.0003 INTS12     | integrator complex subunit 12                   | Multiple_Complex |
| TC1500010871.hg.1    | 8.64  | 9.64  | -2.01 | 4.82E-05 | 0.0003 ZNF280D    | zinc finger protein 280D                        | Multiple_Complex |
| TC1100007408.hg.1    | 3.4   | 4.14  | -1.67 | 4.83E-05 | 0.0003 PRDM11     | PR domain containing 11                         | Multiple_Complex |
| TC1100006923.hg.1    | 9.4   | 10.36 | -1.95 | 4.83E-05 | 0.0003 PDE3B      | phosphodiesterase 3B, cGMP-inhibited            | Multiple_Complex |
| TC1000011548.hg.1    | 4.86  | 3.71  | 2.23  | 4.85E-05 | 0.0003 RRP12      | Zhang2013 ALT_ACCEPTOR, ALT_DONOR, cod          | NonCoding        |
| TC1700010828.hg.1    | 5.61  | 5.1   | 1.43  | 4.86E-05 | 0.0003 FAM171A2   | family with sequence similarity 171, member     | Multiple_Complex |
| TC1500007671.hg.1    | 10    | 10.72 | -1.65 | 4.86E-05 | 0.0003 FEM1B      | fem-1 homolog b (C. elegans)                    | Coding           |
| TC1200007891.hg.1    | 5.87  | 6.59  | -1.64 | 4.87E-05 | 0.0003 DTX3       | deltex 3, E3 ubiquitin ligase                   | Multiple_Complex |
| TC0200016366.hg.1    | 6.21  | 7.09  | -1.85 | 4.88E-05 | 0.0003 THAP4      | THAP domain containing 4                        | Multiple_Complex |
| TC1900008057.hg.1    | 16.3  | 15.04 | 2.4   | 4.90E-05 | 0.0003 ZFP36      | ZFP36 ring finger protein                       | Coding           |
| TC0400006712.hg.1    | 9.98  | 9.04  | 1.92  | 4.90E-05 | 0.0003 TADA2B     | transcriptional adaptor 2B                      | Multiple_Complex |
| TC1800009214.hg.1    | 8.31  | 7.18  | 2.19  | 4.90E-05 | 0.0003 NDUFV2     | NADH dehydrogenase (ubiquinone) flavoprote      | Multiple_Complex |
| TC1900009859.hg.1    | 12.48 | 13.67 | -2.29 | 4.91E-05 | 0.0003 BRD4       | bromodomain containing 4                        | Multiple_Complex |
| TC0X00007116.hg.1    | 12.26 | 11.27 | 1.98  | 4.93E-05 | 0.0003 RP2        | retinitis pigmentosa 2 (X-linked recessive)     | Multiple_Complex |
| TC1100007030.hg.1    | 6.63  | 5.68  | 1.93  | 4.95E-05 | 0.0003 NAV2       | neuron navigator 2                              | Multiple_Complex |
| TC1100010063.hg.1    | 7.74  | 7     | 1.67  | 4.96E-05 | 0.0003 TMEM41B    | transmembrane protein 41B                       | Multiple_Complex |
| TC2000007329.hg.1    | 4.93  | 5.63  | -1.62 | 4.96E-05 | 0.0003 ACTR5      | ARP5 actin-related protein 5 homolog (yeast)    | Multiple_Complex |
| TSUnmapped00000440.h | 6.51  | 7.53  | -2.04 | 4.98E-05 | 0.0003 HYOU1      | hypoxia up-regulated 1                          | Coding           |
| TC0200013610.hg.1    | 7.47  | 7.92  | -1.37 | 4.99E-05 | 0.0003 REV1       | REV1, DNA directed polymerase                   | Multiple_Complex |
| TC2000009980.hg.1    | 5.4   | 4.73  | 1.59  | 5.00E-05 | 0.0003 LINC00654  | long intergenic non-protein coding RNA 654      | NonCoding        |
| TC1500010128.hg.1    | 9.23  | 10.21 | -1.97 | 5.00E-05 | 0.0003 TBC1D2B    | TBC1 domain family, member 2B                   | Multiple_Complex |
| TC0600013054.hg.1    | 12.41 | 11.33 | 2.12  | 5.01E-05 | 0.0003 SERINC1    | serine incorporator 1                           | Multiple_Complex |
| TC0700013612.hg.1    | 7.03  | 5.9   | 2.19  | 5.01E-05 | 0.0003 NDUFA5     | NADH dehydrogenase (ubiquinone) 1 alpha su      | Multiple_Complex |
| TC0600014089.hg.1    | 7.83  | 6.99  | 1.79  | 5.06E-05 | 0.0003 PGBD1      | piggyBac transposable element derived 1         | Multiple_Complex |
| TC0600011859.hg.1    | 5.26  | 5.96  | -1.62 | 5.08E-05 | 0.0003 MRPL2      | mitochondrial ribosomal protein L2              | Multiple_Complex |
| TC1300008708.hg.1    | 11.07 | 9.62  | 2.75  | 5.09E-05 | 0.0003 ELF1       | Memczak2013 ALT_ACCEPTOR, ALT_DONOR,            | NonCoding        |

|                   |       |       |        |          |        |                  |                                                         |                  |
|-------------------|-------|-------|--------|----------|--------|------------------|---------------------------------------------------------|------------------|
| TC1600006995.hg.1 | 9.71  | 10.33 | -1.54  | 5.10E-05 | 0.0003 | BFAR             | bifunctional apoptosis regulator                        | Multiple_Complex |
| TC2200009195.hg.1 | 6.88  | 6.22  | 1.58   | 5.11E-05 | 0.0003 | AIFM3            | apoptosis-inducing factor, mitochondrion-associated     | Multiple_Complex |
| TC1500008175.hg.1 | 3.64  | 4.49  | -1.8   | 5.12E-05 | 0.0003 | PDE8A            | phosphodiesterase 8A                                    | Multiple_Complex |
| TC0800009856.hg.1 | 5.9   | 3.89  | 4.05   | 5.13E-05 | 0.0003 | EGR3             | early growth response 3                                 | Multiple_Complex |
| TC1900011926.hg.1 | 7.66  | 8.72  | -2.08  | 5.13E-05 | 0.0003 | ZNF91            | zinc finger protein 91                                  | Multiple_Complex |
| TC0500008233.hg.1 | 6.53  | 4.97  | 2.95   | 5.13E-05 | 0.0003 | C5orf30          | chromosome 5 open reading frame 30                      | Coding           |
| TC0500008437.hg.1 | 8.43  | 9.21  | -1.71  | 5.16E-05 | 0.0003 | TNFAIP8          | tumor necrosis factor, alpha-induced protein 8          | Multiple_Complex |
| TC0700013323.hg.1 | 6.14  | 6.96  | -1.76  | 5.17E-05 | 0.0003 | SUN1             | Sad1 and UNC84 domain containing 1                      | Multiple_Complex |
| TC0900007096.hg.1 | 8.25  | 7.43  | 1.76   | 5.17E-05 | 0.0003 | CREB3            | cAMP responsive element binding protein 3               | Multiple_Complex |
| TC0600011138.hg.1 | 7.8   | 6.89  | 1.87   | 5.19E-05 | 0.0003 | HIST1H1D         | histone cluster 1, H1d                                  | Multiple_Complex |
| TC1400007093.hg.1 | 7.66  | 6.97  | 1.61   | 5.21E-05 | 0.0003 | KLHDC1           | kelch domain containing 1                               | Multiple_Complex |
| TC0500007465.hg.1 | 10.89 | 9.52  | 2.6    | 5.23E-05 | 0.0003 | GPBP1            | GC-rich promoter binding protein 1                      | Multiple_Complex |
| TC0600011067.hg.1 | 10.54 | 9.3   | 2.36   | 5.23E-05 | 0.0003 | TDP2             | tyrosyl-DNA phosphodiesterase 2                         | Multiple_Complex |
| TC0800007688.hg.1 | 16.05 | 14.94 | 2.14   | 5.24E-05 | 0.0003 | LYN              | LYN proto-oncogene, Src family tyrosine kinase          | Multiple_Complex |
| TC1500010659.hg.1 | 9.86  | 8.78  | 2.11   | 5.26E-05 | 0.0003 | SNRPA1           | small nuclear ribonucleoprotein polypeptide A1          | Multiple_Complex |
| TC1900012056.hg.1 | 3.56  | 4.42  | -1.81  | 5.26E-05 | 0.0003 | ZNF772           | zinc finger protein 772                                 | Multiple_Complex |
| TC1600007240.hg.1 | 13.7  | 13.06 | 1.55   | 5.28E-05 | 0.0003 | PRKCB            | protein kinase C, beta                                  | Multiple_Complex |
| TC0800012371.hg.1 | 11.78 | 15.19 | -10.63 | 5.28E-05 | 0.0003 | LY6E             | lymphocyte antigen 6 complex, locus E                   | Multiple_Complex |
| TC1000007275.hg.1 | 11.23 | 10.36 | 1.83   | 5.28E-05 | 0.0003 | CCNY             | cyclin Y                                                | Multiple_Complex |
| TC0300013296.hg.1 | 6.05  | 6.93  | -1.83  | 5.31E-05 | 0.0003 | DNAJC19          | DnaJ (Hsp40) homolog, subfamily C, member 19            | Multiple_Complex |
| TC1700011783.hg.1 | 6.88  | 7.79  | -1.88  | 5.33E-05 | 0.0003 | SRP68            | signal recognition particle 68kDa                       | Multiple_Complex |
| TC0200013323.hg.1 | 8.26  | 10.06 | -3.49  | 5.35E-05 | 0.0003 | CD8A             | CD8a molecule                                           | Multiple_Complex |
| TC1300008289.hg.1 | 11.21 | 10.34 | 1.83   | 5.36E-05 | 0.0003 | ZDHHC20          | zinc finger, DHHC-type containing 20                    | Multiple_Complex |
| TC0100014988.hg.1 | 4.74  | 3.96  | 1.71   | 5.38E-05 | 0.0003 | F3               | coagulation factor III (thromboplastin, tissue factor)  | Multiple_Complex |
| TC0100011847.hg.1 | 14.33 | 13.56 | 1.7    | 5.40E-05 | 0.0003 | ARF1; MIR5003    | ADP-ribosylation factor 1; microRNA 3620                | Multiple_Complex |
| TC0200014792.hg.1 | 5.44  | 6.98  | -2.91  | 5.41E-05 | 0.0003 | COBLL1           | cordons-bleu WH2 repeat protein like 1                  | Multiple_Complex |
| TC0200012412.hg.1 | 4.23  | 3.53  | 1.63   | 5.41E-05 | 0.0003 | C1GALT1C1        | C1GALT1-specific chaperone 1 like                       | Multiple_Complex |
| TC1600008869.hg.1 | 7.18  | 6.38  | 1.74   | 5.44E-05 | 0.0003 | ZNF778           | zinc finger protein 778                                 | Multiple_Complex |
| TC0300006791.hg.1 | 11.1  | 12.18 | -2.11  | 5.44E-05 | 0.0003 | KAT2B            | K(lysine) acetyltransferase 2B                          | Multiple_Complex |
| TC1200007769.hg.1 | 6.34  | 5.62  | 1.65   | 5.44E-05 | 0.0003 | PDE1B            | phosphodiesterase 1B, calmodulin-dependent              | Multiple_Complex |
| TC0500013240.hg.1 | 5.3   | 4.53  | 1.71   | 5.45E-05 | 0.0003 | PCDH8            | protocadherin beta 4                                    | Multiple_Complex |
| TC0900012042.hg.1 | 5.83  | 5.17  | 1.58   | 5.48E-05 | 0.0003 | RNF208           | ring finger protein 208                                 | Coding           |
| TC0700007630.hg.1 | 8.69  | 9.45  | -1.69  | 5.48E-05 | 0.0003 | CCT6A            | chaperonin containing TCP1, subunit 6A (zeta)           | Multiple_Complex |
| TC0700013548.hg.1 | 5.41  | 6.31  | -1.87  | 5.48E-05 | 0.0003 | URGCP            | upregulator of cell proliferation                       | Multiple_Complex |
| TC1900007850.hg.1 | 7.17  | 8.86  | -3.24  | 5.49E-05 | 0.0003 | CD22; MIR5004    | CD22 molecule; microRNA 5196                            | Multiple_Complex |
| TC0300014075.hg.1 | 7.35  | 8.41  | -2.08  | 5.51E-05 | 0.0003 | TRIM59           | tripartite motif containing 59                          | Coding           |
| TC1600008979.hg.1 | 4.03  | 4.79  | -1.7   | 5.51E-05 | 0.0003 | NARFL            | nuclear prelamin A recognition factor-like              | Multiple_Complex |
| TC0400012126.hg.1 | 5.62  | 6.18  | -1.47  | 5.56E-05 | 0.0003 | GATB             | glutamyl-tRNA(Gln) amidotransferase, subunit beta       | Multiple_Complex |
| TC1600007315.hg.1 | 3.69  | 4.51  | -1.76  | 5.58E-05 | 0.0003 | IL21R            | interleukin 21 receptor                                 | Multiple_Complex |
| TC0800010427.hg.1 | 10.06 | 9.03  | 2.05   | 5.61E-05 | 0.0003 | RB1CC1           | RB1-inducible coiled-coil 1                             | Multiple_Complex |
| TC1600011478.hg.1 | 3.74  | 4.38  | -1.56  | 5.62E-05 | 0.0003 | TMEM186          | transmembrane protein 186                               | Multiple_Complex |
| TC0700010692.hg.1 | 11.95 | 10.13 | 3.52   | 5.64E-05 | 0.0003 | NT5C3A           | 5-nucleotidase, cytosolic IIIA                          | Multiple_Complex |
| TC0X00008776.hg.1 | 4.79  | 5.43  | -1.56  | 5.65E-05 | 0.0003 | ZNF275           | zinc finger protein 275                                 | Multiple_Complex |
| TC1200012597.hg.1 | 10.08 | 8.8   | 2.42   | 5.65E-05 | 0.0003 | MGST1            | microsomal glutathione S-transferase 1                  | Multiple_Complex |
| TC1700006654.hg.1 | 7.42  | 8.72  | -2.48  | 5.65E-05 | 0.0003 | RNF167           | ring finger protein 167                                 | Multiple_Complex |
| TC0900010404.hg.1 | 12.98 | 12.3  | 1.6    | 5.67E-05 | 0.0003 | ZFAND5           | zinc finger, AN1-type domain 5                          | Multiple_Complex |
| TC1000008236.hg.1 | 10.02 | 11.32 | -2.47  | 5.68E-05 | 0.0003 | TSPAN14          | tetraspanin 14                                          | Multiple_Complex |
| TC1500010740.hg.1 | 6.6   | 7.52  | -1.9   | 5.68E-05 | 0.0003 | DTWD1            | DTW domain containing 1                                 | Multiple_Complex |
| TC1200010901.hg.1 | 7.14  | 7.98  | -1.79  | 5.68E-05 | 0.0003 | RNF41            | ring finger protein 41, E3 ubiquitin protein ligase     | Multiple_Complex |
| TC0Y00007319.hg.1 | 7.86  | 6.85  | 2.02   | 5.70E-05 | 0.0003 | AKAP17A; SLC11A1 | Homo sapiens A kinase (PKA) anchor protein 17A; SLC11A1 | Multiple_Complex |
| TC1100013202.hg.1 | 6.09  | 6.96  | -1.83  | 5.71E-05 | 0.0003 | ORAOV1           | oral cancer overexpressed 1                             | Multiple_Complex |
| TC1700012249.hg.1 | 6.54  | 7.46  | -1.9   | 5.72E-05 | 0.0003 | MIR4728; ESR1    | microRNA 4728; erb-b2 receptor tyrosine kinase 1        | Multiple_Complex |
| TC1900009564.hg.1 | 4.22  | 3.56  | 1.58   | 5.72E-05 | 0.0003 | OR7G3            | olfactory receptor, family 7, subfamily G, member 3     | Coding           |
| TC2000010018.hg.1 | 4.95  | 4.24  | 1.63   | 5.72E-05 | 0.0003 | EPPIN-WFC        | EPPIN-WFDC6 readthrough                                 | Coding           |
| TC1900010521.hg.1 | 5.26  | 6.14  | -1.84  | 5.73E-05 | 0.0003 | ZFP14            | ZFP14 zinc finger protein                               | Multiple_Complex |
| TC1900008172.hg.1 | 4.93  | 5.78  | -1.8   | 5.76E-05 | 0.0003 | ZNF574           | zinc finger protein 574                                 | Coding           |
| TC0100008938.hg.1 | 7.59  | 8.58  | -1.98  | 5.78E-05 | 0.0003 | LMO4             | LIM domain only 4                                       | Multiple_Complex |
| TC0100013303.hg.1 | 5.19  | 6.16  | -1.96  | 5.80E-05 | 0.0003 | HMGCL            | 3-hydroxymethyl-3-methylglutaryl-CoA lyase              | Multiple_Complex |
| TC1000007471.hg.1 | 11.78 | 10.18 | 3.03   | 5.88E-05 | 0.0003 | ALOX5            | arachidonate 5-lipoxygenase                             | Multiple_Complex |
| TC1600011367.hg.1 | 7.52  | 8.33  | -1.75  | 5.88E-05 | 0.0003 | SPNS1            | spinster homolog 1 (Drosophila)                         | Multiple_Complex |
| TC1900011820.hg.1 | 5.63  | 6.44  | -1.76  | 5.91E-05 | 0.0003 | ZNF551           | zinc finger protein 551                                 | Multiple_Complex |
| TC0100007398.hg.1 | 14.45 | 13.41 | 2.06   | 5.93E-05 | 0.0004 | TMEM50A          | transmembrane protein 50A                               | Multiple_Complex |
| TC0M00006435.hg.1 | 19.26 | 19.65 | -1.31  | 5.99E-05 | 0.0004 | COX1             | cytochrome c oxidase subunit I                          | Coding           |
| TC0300013639.hg.1 | 10.46 | 9.72  | 1.67   | 6.04E-05 | 0.0004 | PPP1R2           | protein phosphatase 1, regulatory (inhibitor) subunit 2 | Multiple_Complex |
| TC0100009204.hg.1 | 6.57  | 7.56  | -1.99  | 6.06E-05 | 0.0004 | TRMT13           | tRNA methyltransferase 13 homolog (S. cerevisiae)       | Multiple_Complex |
| TC0100009907.hg.1 | 5.07  | 5.68  | -1.53  | 6.08E-05 | 0.0004 | TARS2; MIF       | threonyl-tRNA synthetase 2, mitochondrial (pig)         | Multiple_Complex |
| TC1900007975.hg.1 | 5.09  | 6.09  | -2     | 6.08E-05 | 0.0004 | ZNF570           | zinc finger protein 570                                 | Multiple_Complex |
| TC0300007278.hg.1 | 11.75 | 10.57 | 2.28   | 6.08E-05 | 0.0004 | NBEAL2           | neurobeachin like 2                                     | Multiple_Complex |
| TC1500006946.hg.1 | 7.5   | 6.53  | 1.96   | 6.10E-05 | 0.0004 | INAFM2           | InaF-motif containing 2                                 | Multiple_Complex |
| TC1100011539.hg.1 | 8.25  | 9.16  | -1.88  | 6.16E-05 | 0.0004 | NUMA1            | nuclear mitotic apparatus protein 1                     | Multiple_Complex |



|                      |       |       |       |          |        |            |                                                   |                  |
|----------------------|-------|-------|-------|----------|--------|------------|---------------------------------------------------|------------------|
| TC1800007431.hg.1    | 8.86  | 10.19 | -2.51 | 6.20E-05 | 0.0004 | MALT1      | MALT1 paracaspase                                 | Multiple_Complex |
| TSUnmapped00000432.h | 6.92  | 6.22  | 1.62  | 6.21E-05 | 0.0004 | NDUFA6     | NADH dehydrogenase (ubiquinone) 1 alpha su        | Coding           |
| TC1700008104.hg.1    | 7.49  | 8.97  | -2.79 | 6.21E-05 | 0.0004 | NSF        | N-ethylmaleimide-sensitive factor                 | Multiple_Complex |
| TC0600006836.hg.1    | 9.69  | 10.82 | -2.19 | 6.22E-05 | 0.0004 | LY86       | lymphocyte antigen 86                             | Multiple_Complex |
| TC0X00011211.hg.1    | 12.18 | 11.01 | 2.24  | 6.23E-05 | 0.0004 | G6PD       | glucose-6-phosphate dehydrogenase                 | Multiple_Complex |
| TC0500006442.hg.1    | 8.38  | 9.03  | -1.57 | 6.24E-05 | 0.0004 | SDHA       | succinate dehydrogenase complex subunit A,        | Multiple_Complex |
| TC0200008259.hg.1    | 9.02  | 9.91  | -1.85 | 6.29E-05 | 0.0004 | MAT2A      | methionine adenosyltransferase II, alpha          | Multiple_Complex |
| TC0700013509.hg.1    | 7.53  | 8.33  | -1.73 | 6.29E-05 | 0.0004 | DAGLB      | diacylglycerol lipase, beta                       | Multiple_Complex |
| TC1300009637.hg.1    | 5.25  | 6.1   | -1.81 | 6.29E-05 | 0.0004 | GGACT      | gamma-glutamylamine cyclotransferase              | Multiple_Complex |
| TC1000006754.hg.1    | 14.51 | 15.49 | -1.97 | 6.34E-05 | 0.0004 | CEL2F2     | CUGBP, Elav-like family member 2                  | Multiple_Complex |
| TC0300014082.hg.1    | 4.47  | 3.65  | 1.76  | 6.34E-05 | 0.0004 | ETV5       | ets variant 5                                     | Multiple_Complex |
| TC1000008269.hg.1    | 12.31 | 11.55 | 1.69  | 6.36E-05 | 0.0004 | GHITM      | growth hormone inducible transmembrane pr         | Multiple_Complex |
| TC0700011499.hg.1    | 4.09  | 4.71  | -1.55 | 6.37E-05 | 0.0004 | DNAJC30    | DnaJ (Hsp40) homolog, subfamily C, member         | Coding           |
| TC1600011325.hg.1    | 6.04  | 6.85  | -1.74 | 6.38E-05 | 0.0004 | CRAMP1     | cramped chromatin regulator homolog 1             | Multiple_Complex |
| TC0100015023.hg.1    | 13.31 | 14.43 | -2.18 | 6.39E-05 | 0.0004 | DPYD       | dihydropyrimidine dehydrogenase                   | Multiple_Complex |
| TC0100013087.hg.1    | 8.36  | 9.39  | -2.04 | 6.40E-05 | 0.0004 | RCC2       | regulator of chromosome condensation 2            | Multiple_Complex |
| TC0800009674.hg.1    | 6.23  | 5.34  | 1.86  | 6.43E-05 | 0.0004 | LONRF1     | Transcript Identified by AceView, Entrez Gene     | Unassigned       |
| TC1600011234.hg.1    | 5.35  | 5.91  | -1.48 | 6.45E-05 | 0.0004 | APRT       | adenine phosphoribosyltransferase                 | Multiple_Complex |
| TC0700010637.hg.1    | 4.79  | 5.33  | -1.45 | 6.46E-05 | 0.0004 | NOD1       | nucleotide-binding oligomerization domain co      | Multiple_Complex |
| TC1900009872.hg.1    | 9.23  | 10.02 | -1.72 | 6.46E-05 | 0.0004 | RASAL3     | RAS protein activator like 3                      | Multiple_Complex |
| TC0500008008.hg.1    | 10.44 | 8.52  | 3.79  | 6.55E-05 | 0.0004 | COX7C; MII | cytochrome c oxidase subunit VIIc; microRNA       | Multiple_Complex |
| TSUnmapped00000195.h | 8.53  | 9.2   | -1.6  | 6.56E-05 | 0.0004 | NDUFA10    | NADH dehydrogenase (ubiquinone) 1 alpha su        | Coding           |
| TC0100018198.hg.1    | 4.22  | 3.43  | 1.73  | 6.58E-05 | 0.0004 | SRRM1      | serine/arginine repetitive matrix 1               | NonCoding        |
| TC2100008462.hg.1    | 7.24  | 7.98  | -1.66 | 6.58E-05 | 0.0004 | LSS        | lanosterol synthase (2,3-oxidosqualene-lanost     | Multiple_Complex |
| TC1900008085.hg.1    | 7.22  | 8.58  | -2.56 | 6.59E-05 | 0.0004 | ZNF546     | zinc finger protein 546                           | Multiple_Complex |
| TC1900012048.hg.1    | 3.77  | 3.16  | 1.53  | 6.59E-05 | 0.0004 | DNAAF3     | dynein, axonemal, assembly factor 3               | Multiple_Complex |
| TC1600008567.hg.1    | 6.39  | 5.49  | 1.86  | 6.60E-05 | 0.0004 | CENPN      | centromere protein N                              | Multiple_Complex |
| TC1900011759.hg.1    | 4.91  | 4.17  | 1.67  | 6.61E-05 | 0.0004 | APOC1      | apolipoprotein C-I                                | Multiple_Complex |
| TC0200010800.hg.1    | 4.67  | 4.02  | 1.56  | 6.62E-05 | 0.0004 | VIL1       | villin 1                                          | Multiple_Complex |
| TC0600007257.hg.1    | 9.38  | 11.31 | -3.81 | 6.62E-05 | 0.0004 | TRIM38     | tripartite motif containing 38                    | Multiple_Complex |
| TC0300014053.hg.1    | 10.68 | 9.61  | 2.11  | 6.65E-05 | 0.0004 | PIK3CB     | phosphatidylinositol-4,5-bisphosphate 3-kinas     | Multiple_Complex |
| TC1900011679.hg.1    | 11.44 | 9.4   | 4.1   | 6.66E-05 | 0.0004 | CYP4F3     | cytochrome P450, family 4, subfamily F, polyp     | Multiple_Complex |
| TC1200012334.hg.1    | 18.14 | 17.43 | 1.64  | 6.68E-05 | 0.0004 | UBC        | ubiquitin C                                       | Multiple_Complex |
| TC0300006985.hg.1    | 7.37  | 8.69  | -2.5  | 6.71E-05 | 0.0004 | CCR4       | chemokine (C-C motif) receptor 4                  | Coding           |
| TC0400009746.hg.1    | 8.44  | 7.79  | 1.57  | 6.76E-05 | 0.0004 | SLBP       | stem-loop binding protein                         | Multiple_Complex |
| TC0X00009760.hg.1    | 7.12  | 8.01  | -1.86 | 6.79E-05 | 0.0004 | SMC1A      | structural maintenance of chromosomes 1A          | Multiple_Complex |
| TC0200016603.hg.1    | 10.78 | 10.14 | 1.55  | 6.80E-05 | 0.0004 | LRRFIP1    | leucine rich repeat (in FLII) interacting protein | Multiple_Complex |
| TC0900011713.hg.1    | 11.32 | 12.07 | -1.69 | 6.80E-05 | 0.0004 | FNBP1      | formin binding protein 1                          | Multiple_Complex |
| TC0200010416.hg.1    | 4.52  | 6.38  | -3.65 | 6.81E-05 | 0.0004 | SPATS2L    | Transcript Identified by AceView, Entrez Gene     | Unassigned       |
| TC1700011083.hg.1    | 4.49  | 3.78  | 1.64  | 6.85E-05 | 0.0004 | SAMD14     | sterile alpha motif domain containing 14          | Multiple_Complex |
| TC0300008381.hg.1    | 6.5   | 7.35  | -1.8  | 6.87E-05 | 0.0004 | QTRTD1     | queuine tRNA-ribosyltransferase domain cont       | Multiple_Complex |
| TC0900010444.hg.1    | 8.34  | 8.96  | -1.53 | 6.88E-05 | 0.0004 | CARNMT1    | carnosine N-methyltransferase 1                   | Multiple_Complex |
| TC1100012166.hg.1    | 8.59  | 6.68  | 3.74  | 6.91E-05 | 0.0004 | CASP5      | caspase 5                                         | Multiple_Complex |
| TC1700011448.hg.1    | 5.8   | 6.72  | -1.88 | 6.91E-05 | 0.0004 | POLG2      | polymerase (DNA directed), gamma 2, access        | Multiple_Complex |
| TC0400011220.hg.1    | 9.67  | 8.34  | 2.51  | 6.92E-05 | 0.0004 | WDFY3      | WD repeat and FYVE domain containing 3            | Multiple_Complex |
| TC0600012671.hg.1    | 6.14  | 7.66  | -2.87 | 6.94E-05 | 0.0004 | ASCC3      | activating signal cointegrator 1 complex subur    | Multiple_Complex |
| TC0100010360.hg.1    | 7.48  | 8.59  | -2.15 | 6.95E-05 | 0.0004 | HSPA6      | heat shock 70kDa protein 6 (HSP70B)               | Multiple_Complex |
| TC1200011994.hg.1    | 4.76  | 4.09  | 1.59  | 6.97E-05 | 0.0004 | SDS        | serine dehydratase                                | Multiple_Complex |
| TC1400010019.hg.1    | 6.96  | 6.4   | 1.47  | 6.99E-05 | 0.0004 | MOAP1      | modulator of apoptosis 1                          | Coding           |
| TC1100008069.hg.1    | 5.44  | 4.6   | 1.8   | 7.02E-05 | 0.0004 | CNIH2      | cornichon family AMPA receptor auxiliary pro      | Multiple_Complex |
| TC1400009190.hg.1    | 6.91  | 8.03  | -2.16 | 7.04E-05 | 0.0004 | GNPNAT1    | glucosamine-phosphate N-acetyltransferase 1       | Multiple_Complex |
| TC0300013763.hg.1    | 8.35  | 9.79  | -2.71 | 7.08E-05 | 0.0004 | RUBCN; MI  | RUN domain and cysteine-rich domain contain       | Multiple_Complex |
| TC0100014855.hg.1    | 9.05  | 10.41 | -2.57 | 7.12E-05 | 0.0004 | GBP4       | guanylate binding protein 4                       | Multiple_Complex |
| TC0100010672.hg.1    | 9.33  | 8.45  | 1.84  | 7.12E-05 | 0.0004 | RABGAP1L   | RAB GTPase activating protein 1-like              | Multiple_Complex |
| TC0200013516.hg.1    | 13.23 | 14.25 | -2.03 | 7.16E-05 | 0.0004 | TMEM127    | transmembrane protein 127                         | Coding           |
| TC1600008228.hg.1    | 7.19  | 8.11  | -1.89 | 7.17E-05 | 0.0004 | CY5B       | cytochrome b5 type B (outer mitochondrial m       | Multiple_Complex |
| TC1600007308.hg.1    | 4.5   | 5.2   | -1.62 | 7.22E-05 | 0.0004 | KDM8       | lysine (K)-specific demethylase 8                 | Multiple_Complex |
| TSUnmapped00000299.h | 6.87  | 5.85  | 2.03  | 7.26E-05 | 0.0004 | TRAPPC4    | trafficking protein particle complex 4            | NonCoding        |
| TC0100010334.hg.1    | 9.14  | 7.77  | 2.59  | 7.27E-05 | 0.0004 | UFC1       | ubiquitin-fold modifier conjugating enzyme 1      | Multiple_Complex |
| TC1900010792.hg.1    | 8.32  | 7.43  | 1.85  | 7.30E-05 | 0.0004 | DEDD2      | death effector domain containing 2                | Multiple_Complex |
| TC1200010835.hg.1    | 8.03  | 9.87  | -3.57 | 7.33E-05 | 0.0004 | NFE2       | nuclear factor, erythroid 2                       | Multiple_Complex |
| TC0400006802.hg.1    | 4.86  | 4.3   | 1.47  | 7.33E-05 | 0.0004 | USP17L19   | ubiquitin specific peptidase 17-like family mer   | Coding           |
| TC2200007607.hg.1    | 11.39 | 12.59 | -2.29 | 7.35E-05 | 0.0004 | NUP50      | nucleoporin 50kDa                                 | Multiple_Complex |
| TC0600014274.hg.1    | 4.7   | 5.73  | -2.03 | 7.36E-05 | 0.0004 | HLA-DOB    | major histocompatibility complex, class II, DO    | Multiple_Complex |
| TC2000006781.hg.1    | 10.3  | 9     | 2.47  | 7.37E-05 | 0.0004 | SNRPB2     | small nuclear ribonucleoprotein polypeptide E     | Multiple_Complex |
| TC1600008585.hg.1    | 11.65 | 10.39 | 2.4   | 7.41E-05 | 0.0004 | CMIP       | c-Maf inducing protein                            | Multiple_Complex |
| TC0300012269.hg.1    | 6.58  | 5.54  | 2.05  | 7.42E-05 | 0.0004 | ALDH1L1    | aldehyde dehydrogenase 1 family, member L1        | Multiple_Complex |
| TC0600007748.hg.1    | 8.92  | 9.65  | -1.66 | 7.42E-05 | 0.0004 | HMGAI1     | high mobility group AT-hook 1                     | Multiple_Complex |
| TC0800007697.hg.1    | 6.75  | 6.07  | 1.61  | 7.43E-05 | 0.0004 | CHCHD7     | coiled-coil-helix-coiled-coil-helix domain cont   | Multiple_Complex |
| TC0500006744.hg.1    | 8.6   | 7.45  | 2.21  | 7.43E-05 | 0.0004 | ROPN1L     | rhopilin associated tail protein 1-like           | Multiple_Complex |

|                      |       |       |       |          |        |                  |                                                                      |                  |
|----------------------|-------|-------|-------|----------|--------|------------------|----------------------------------------------------------------------|------------------|
| TC1000012595.hg.1    | 8.25  | 9.05  | -1.74 | 7.43E-05 | 0.0004 | ZDHC6            | zinc finger, DHHC-type containing 6                                  | Multiple_Complex |
| TC1100006572.hg.1    | 6.27  | 6.83  | -1.47 | 7.45E-05 | 0.0004 | TSPAN32          | tetraspanin 32                                                       | Multiple_Complex |
| TC0100016629.hg.1    | 6.81  | 7.85  | -2.06 | 7.46E-05 | 0.0004 | RNASEL           | ribonuclease L (2,5-oligoadenylate synthetase)                       | Coding           |
| TSUnmapped00000236.h | 8.61  | 9.59  | -1.97 | 7.46E-05 | 0.0004 | TCF20            | transcription factor 20 (AR1)                                        | Coding           |
| TSUnmapped00000511.h | 8.61  | 9.59  | -1.97 | 7.46E-05 | 0.0004 | TCF20            | transcription factor 20 (AR1)                                        | Coding           |
| TC0100017446.hg.1    | 4.71  | 5.66  | -1.93 | 7.49E-05 | 0.0004 | SUSD4            | sushi domain containing 4                                            | Multiple_Complex |
| TC2000008007.hg.1    | 12.78 | 9.11  | 12.67 | 7.51E-05 | 0.0004 | RPS21            | ribosomal protein S21                                                | Multiple_Complex |
| TC2000009918.hg.1    | 8.76  | 6.6   | 4.47  | 7.52E-05 | 0.0004 | BPI              | bactericidal/permeability-increasing protein                         | Multiple_Complex |
| TC0900009308.hg.1    | 7.52  | 8.38  | -1.81 | 7.53E-05 | 0.0004 | EHMT1            | euchromatic histone-lysine N-methyltransferase 1                     | Multiple_Complex |
| TC1900009316.hg.1    | 14.13 | 15.38 | -2.38 | 7.54E-05 | 0.0004 | EEF2; SNOF       | eukaryotic translation elongation factor 2; small ribosomal subunit  | Multiple_Complex |
| TC1100009419.hg.1    | 7.26  | 7.9   | -1.56 | 7.56E-05 | 0.0004 | EI24             | etoposide induced 2.4                                                | Multiple_Complex |
| TC0200013912.hg.1    | 5.39  | 4.73  | 1.58  | 7.56E-05 | 0.0004 | CKAP2L           | cytoskeleton associated protein 2-like                               | Multiple_Complex |
| TC1900008259.hg.1    | 3.78  | 4.55  | -1.71 | 7.62E-05 | 0.0004 | ZNF233           | zinc finger protein 233                                              | Multiple_Complex |
| TC0400006513.hg.1    | 5.16  | 5.88  | -1.65 | 7.66E-05 | 0.0004 | CTBP1-AS2        | CTBP1 antisense RNA 2 (head to head)                                 | Multiple_Complex |
| TC0200013779.hg.1    | 5.55  | 4.33  | 2.32  | 7.68E-05 | 0.0004 | ST6GAL2          | ST6 beta-galactosamide alpha-2,6-sialyltransferase 2                 | Multiple_Complex |
| TC1800007215.hg.1    | 6.27  | 5.2   | 2.1   | 7.72E-05 | 0.0004 | HAUS1            | HAUS augmin like complex subunit 1                                   | Multiple_Complex |
| TC1400010709.hg.1    | 4.21  | 4.83  | -1.54 | 7.75E-05 | 0.0004 | TTC5             | tetratricopeptide repeat domain 5                                    | Multiple_Complex |
| TC1900007025.hg.1    | 10.48 | 8.88  | 3.03  | 7.75E-05 | 0.0004 | PLPPR2           | phospholipid phosphatase related 2                                   | Multiple_Complex |
| TC1100011980.hg.1    | 7.83  | 8.95  | -2.18 | 7.76E-05 | 0.0004 | TAF1D; SNF5      | TATA box binding protein associated factor 1D                        | Multiple_Complex |
| TC0800007328.hg.1    | 7.39  | 8.09  | -1.62 | 7.81E-05 | 0.0004 | BAG4             | BCL2-associated athanogene 4                                         | Multiple_Complex |
| TC0500012100.hg.1    | 12.75 | 11.92 | 1.77  | 7.81E-05 | 0.0004 | H2AFY            | H2A histone family, member Y                                         | Multiple_Complex |
| TSUnmapped00000531.h | 8.06  | 9.12  | -2.1  | 7.82E-05 | 0.0004 | RASA3            | RAS p21 protein activator 3                                          | Coding           |
| TC0100017664.hg.1    | 5.8   | 6.69  | -1.85 | 7.82E-05 | 0.0004 | NUP133           | nucleoporin 133kDa                                                   | Multiple_Complex |
| TC1200010412.hg.1    | 4.73  | 5.97  | -2.37 | 7.82E-05 | 0.0004 | ABCD2            | Transcript Identified by AceView, Entrez Gene                        | Unassigned       |
| TC1300006923.hg.1    | 6.61  | 7.63  | -2.03 | 7.84E-05 | 0.0005 | NHLRC3           | NHL repeat containing 3                                              | Multiple_Complex |
| TC1900011935.hg.1    | 5.02  | 5.92  | -1.87 | 7.86E-05 | 0.0005 | ZFP30            | ZFP30 zinc finger protein                                            | Multiple_Complex |
| TC0100014788.hg.1    | 5.78  | 6.92  | -2.2  | 7.87E-05 | 0.0005 | ZNHIT6           | zinc finger, HIT-type containing 6                                   | Multiple_Complex |
| TC0200008458.hg.1    | 3.5   | 4.38  | -1.84 | 7.89E-05 | 0.0005 | ZNF2             | zinc finger protein 2                                                | Coding           |
| TC1600010752.hg.1    | 6.42  | 7.18  | -1.69 | 7.90E-05 | 0.0005 | AARS             | alanyl-tRNA synthetase                                               | Multiple_Complex |
| TC0700012255.hg.1    | 5.31  | 6.06  | -1.68 | 7.91E-05 | 0.0005 | IMMP2L           | inner mitochondrial membrane peptidase subunit 2                     | Multiple_Complex |
| TC1400008919.hg.1    | 7.6   | 6.28  | 2.5   | 7.92E-05 | 0.0005 | CFL2             | cofilin 2 (muscle)                                                   | Multiple_Complex |
| TC1100012121.hg.1    | 15.09 | 17.6  | -5.71 | 7.94E-05 | 0.0005 | TMEM123          | transmembrane protein 123                                            | Multiple_Complex |
| TC0200016746.hg.1    | 4.62  | 5.36  | -1.66 | 7.94E-05 | 0.0005 | TTC21B           | tetratricopeptide repeat domain 21B                                  | NonCoding        |
| TC1700009538.hg.1    | 8.43  | 9.44  | -2.01 | 7.95E-05 | 0.0005 | SLC25A11         | solute carrier family 25 (mitochondrial carrier) member 11           | Multiple_Complex |
| TC1300006767.hg.1    | 9.43  | 8.32  | 2.16  | 7.99E-05 | 0.0005 | USPL1            | ubiquitin specific peptidase like 1                                  | Multiple_Complex |
| TC2100006852.hg.1    | 9.7   | 8.02  | 3.2   | 8.00E-05 | 0.0005 | USP16            | ubiquitin specific peptidase 16                                      | Multiple_Complex |
| TC1700011744.hg.1    | 4.9   | 5.64  | -1.66 | 8.02E-05 | 0.0005 | MIF4GD           | MIF4G domain containing                                              | Multiple_Complex |
| TC0X00009123.hg.1    | 5.12  | 4.64  | 1.39  | 8.03E-05 | 0.0005 | ASB11            | ankyrin repeat and SOCS box containing 11, Ectoderm                  | Coding           |
| TC0400012312.hg.1    | 6.6   | 5.88  | 1.65  | 8.04E-05 | 0.0005 | ANP32C           | acidic nuclear phosphoprotein 32 family member 3                     | Multiple_Complex |
| TC0100015353.hg.1    | 12.9  | 12.08 | 1.77  | 8.04E-05 | 0.0005 | CSDE1            | cold shock domain containing E1, RNA binding protein                 | Multiple_Complex |
| TC1600009412.hg.1    | 10.81 | 9.87  | 1.91  | 8.05E-05 | 0.0005 | TXNDC11          | thioredoxin domain containing 11                                     | Multiple_Complex |
| TC0600013177.hg.1    | 8.15  | 8.99  | -1.78 | 8.07E-05 | 0.0005 | MED23            | mediator complex subunit 23                                          | Multiple_Complex |
| TC0300006462.hg.1    | 6.11  | 7.04  | -1.92 | 8.08E-05 | 0.0005 | TRNT1            | tRNA nucleotidyl transferase, CCA-adding, 1                          | Multiple_Complex |
| TC1900011813.hg.1    | 5.92  | 6.66  | -1.67 | 8.08E-05 | 0.0005 | ZNF548           | zinc finger protein 548                                              | Multiple_Complex |
| TC0X00010465.hg.1    | 5.71  | 6.45  | -1.67 | 8.09E-05 | 0.0005 | NUP62CL          | nucleoporin 62kDa C-terminal like                                    | Multiple_Complex |
| TC0600014233.hg.1    | 12.28 | 13.16 | -1.84 | 8.13E-05 | 0.0005 | SSR1             | signal sequence receptor, alpha                                      | Multiple_Complex |
| TC0900011473.hg.1    | 8.96  | 8.18  | 1.73  | 8.14E-05 | 0.0005 | DENND1A          | DENN/MADD domain containing 1A                                       | Multiple_Complex |
| TC0700013055.hg.1    | 6.52  | 7.45  | -1.9  | 8.17E-05 | 0.0005 | CDK5             | cyclin-dependent kinase 5                                            | Multiple_Complex |
| TC1700011366.hg.1    | 5.23  | 6.44  | -2.31 | 8.21E-05 | 0.0005 | INTS2            | integrator complex subunit 2                                         | Multiple_Complex |
| TC0X00007574.hg.1    | 4.45  | 5.48  | -2.05 | 8.23E-05 | 0.0005 | ACRC             | acidic repeat containing                                             | Multiple_Complex |
| TC1000007700.hg.1    | 14.71 | 13.74 | 1.95  | 8.26E-05 | 0.0005 | UBE2D1           | ubiquitin conjugating enzyme E2D 1                                   | Multiple_Complex |
| TC1500007659.hg.1    | 13.91 | 14.76 | -1.81 | 8.28E-05 | 0.0005 | PIAS1            | protein inhibitor of activated STAT 1                                | Multiple_Complex |
| TC2100006442.hg.1    | 5.58  | 5.1   | 1.39  | 8.30E-05 | 0.0005 | SIK1             | salt-inducible kinase 1                                              | Multiple_Complex |
| TC1700008178.hg.1    | 9.82  | 10.52 | -1.62 | 8.31E-05 | 0.0005 | ATP5G1           | ATP synthase, H+ transporting, mitochondrial F1F0 complex, subunit 1 | Multiple_Complex |
| TC0300007445.hg.1    | 4.41  | 3.92  | 1.4   | 8.39E-05 | 0.0005 | GRM2             | glutamate receptor, metabotropic 2                                   | Multiple_Complex |
| TC1400010575.hg.1    | 7.79  | 7.22  | 1.48  | 8.40E-05 | 0.0005 | BCL2L2           | BCL2-like 2                                                          | Multiple_Complex |
| TC1800007868.hg.1    | 7.71  | 6.34  | 2.59  | 8.42E-05 | 0.0005 | YES1             | YES proto-oncogene 1, Src family tyrosine kinase                     | Multiple_Complex |
| TC0700009061.hg.1    | 9.3   | 8.32  | 1.98  | 8.44E-05 | 0.0005 | CALU             | calumenin                                                            | Multiple_Complex |
| TC0500012390.hg.1    | 4.96  | 6.2   | -2.36 | 8.45E-05 | 0.0005 | JAKMIP2          | janus kinase and microtubule interacting protein 2                   | Multiple_Complex |
| TC1100006494.hg.1    | 8.02  | 7.13  | 1.85  | 8.51E-05 | 0.0005 | CD151            | CD151 molecule (Raph blood group)                                    | Multiple_Complex |
| TC1200009416.hg.1    | 8.24  | 7.16  | 2.12  | 8.54E-05 | 0.0005 | RAN              | RAN, member RAS oncogene family                                      | Multiple_Complex |
| TC0900007775.hg.1    | 8.13  | 8.78  | -1.58 | 8.55E-05 | 0.0005 | NAA35            | N(alpha)-acetyltransferase 35, NatC auxiliary subunit                | Multiple_Complex |
| TC2000009357.hg.1    | 15.42 | 13.93 | 2.81  | 8.60E-05 | 0.0005 | PREX1            | phosphatidylinositol-3,4,5-trisphosphate-dependent protein kinase    | Multiple_Complex |
| TC0100009365.hg.1    | 9.85  | 10.72 | -1.83 | 8.61E-05 | 0.0005 | AHCYL1           | adenosylhomocysteinase like 1                                        | Multiple_Complex |
| TC0X00010926.hg.1    | 6.64  | 7.54  | -1.87 | 8.61E-05 | 0.0005 | MAP7D3           | MAP7 domain containing 3                                             | Multiple_Complex |
| TC0100006550.hg.1    | 5.76  | 6.65  | -1.84 | 8.64E-05 | 0.0005 | PRKCZ            | protein kinase C, zeta                                               | Multiple_Complex |
| TC0300007474.hg.1    | 8.64  | 9.29  | -1.57 | 8.65E-05 | 0.0005 | DNAH1            | dynein, axonemal, heavy chain 1                                      | Multiple_Complex |
| TC1900008879.hg.1    | 4.53  | 5.99  | -2.74 | 8.66E-05 | 0.0005 | KIR2DS5; KIR2D5L | killer cell immunoglobulin-like receptor, two domain type 5          | Multiple_Complex |
| TC0300007607.hg.1    | 5.44  | 6.52  | -2.12 | 8.67E-05 | 0.0005 | RPP14            | ribonuclease P/MRP 14kDa subunit                                     | Multiple_Complex |
| TC1200009744.hg.1    | 6.83  | 7.72  | -1.86 | 8.68E-05 | 0.0005 | LPAR5            | lysophosphatidic acid receptor 5                                     | Multiple_Complex |

|                      |       |       |       |          |        |           |                                                 |                  |
|----------------------|-------|-------|-------|----------|--------|-----------|-------------------------------------------------|------------------|
| TC0400006437.hg.1    | 6.25  | 7.04  | -1.72 | 8.70E-05 | 0.0005 | ZNF718    | zinc finger protein 718                         | Multiple_Complex |
| TC1000009844.hg.1    | 6.42  | 7.37  | -1.94 | 8.74E-05 | 0.0005 | SEPHS1    | selenophosphate synthetase 1                    | Multiple_Complex |
| TC0500009095.hg.1    | 5.63  | 4.94  | 1.62  | 8.76E-05 | 0.0005 | NDST1     | N-deacetylase/N-sulfotransferase (heparan gl    | Multiple_Complex |
| TC0800006692.hg.1    | 8.04  | 7     | 2.06  | 8.77E-05 | 0.0005 | MSRA      | methionine sulfoxide reductase A                | Multiple_Complex |
| TC0400007592.hg.1    | 6.79  | 8.11  | -2.5  | 8.82E-05 | 0.0005 | PAICS     | phosphoribosylaminoimidazole carboxylase, p     | Multiple_Complex |
| TC0600009112.hg.1    | 11.08 | 9.82  | 2.38  | 8.84E-05 | 0.0005 | CDC40     | cell division cycle 40                          | Multiple_Complex |
| TC0500013401.hg.1    | 14.32 | 15.63 | -2.49 | 8.85E-05 | 0.0005 | LCP2      | lymphocyte cytosolic protein 2                  | Multiple_Complex |
| TC1200012083.hg.1    | 6.8   | 7.59  | -1.72 | 8.86E-05 | 0.0005 | FBXO21    | F-box protein 21                                | Multiple_Complex |
| TC1700012218.hg.1    | 4.78  | 5.47  | -1.62 | 8.88E-05 | 0.0005 | SARM1     | sterile alpha and TIR motif containing 1        | Multiple_Complex |
| TC1100013057.hg.1    | 12.79 | 11.35 | 2.7   | 8.91E-05 | 0.0005 | TCIRG1    | T-cell, immune regulator 1, ATPase, H+ transp   | Multiple_Complex |
| TC0400012018.hg.1    | 4.63  | 6.54  | -3.76 | 8.93E-05 | 0.0005 | GYPB      | glycophorin B (MNS blood group)                 | Multiple_Complex |
| TC1900006526.hg.1    | 4.23  | 5.52  | -2.44 | 8.94E-05 | 0.0005 | MUM1      | melanoma associated antigen (mutated) 1         | Multiple_Complex |
| TC1400010784.hg.1    | 5.36  | 6     | -1.56 | 8.94E-05 | 0.0005 | SYNE3     | spectrin repeat containing, nuclear envelope f  | Multiple_Complex |
| TSUnmapped00000610.h | 5.48  | 4.81  | 1.59  | 8.95E-05 | 0.0005 | HNRNPCL2  | heterogeneous nuclear ribonucleoprotein C-ii    | Coding           |
| TC1600011499.hg.1    | 5.77  | 5.05  | 1.65  | 8.99E-05 | 0.0005 | ERI2      | ERI1 exoribonuclease family member 2            | Multiple_Complex |
| TC1100011829.hg.1    | 6.26  | 7.28  | -2.02 | 9.01E-05 | 0.0005 | CREBZF    | CREB/ATF bZIP transcription factor              | Multiple_Complex |
| TC1700009378.hg.1    | 10.54 | 9.84  | 1.62  | 9.08E-05 | 0.0005 | PITPNA    | phosphatidylinositol transfer protein, alpha    | Multiple_Complex |
| TC0700009485.hg.1    | 9.2   | 10.45 | -2.38 | 9.08E-05 | 0.0005 | GSTK1     | glutathione S-transferase kappa 1               | Multiple_Complex |
| TC0200008996.hg.1    | 15.65 | 14.55 | 2.14  | 9.09E-05 | 0.0005 | ACTR3     | ARP3 actin-related protein 3 homolog (yeast)    | Multiple_Complex |
| TC0100017666.hg.1    | 6.63  | 7.54  | -1.88 | 9.10E-05 | 0.0005 | ABC810    | ATP binding cassette subfamily B member 10      | Multiple_Complex |
| TC0300012790.hg.1    | 7.6   | 7.09  | 1.42  | 9.10E-05 | 0.0005 | TMEM183E  | transmembrane protein 183B                      | Multiple_Complex |
| TC0700011550.hg.1    | 11.41 | 12.73 | -2.5  | 9.11E-05 | 0.0005 | POM121C   | POM121 transmembrane nucleoporin C              | Multiple_Complex |
| TC0800007077.hg.1    | 10.56 | 11.12 | -1.47 | 9.12E-05 | 0.0005 | PPP2R2A   | protein phosphatase 2, regulatory subunit B, ε  | Multiple_Complex |
| TC1900009352.hg.1    | 5.45  | 4.85  | 1.52  | 9.15E-05 | 0.0005 | SEMA6B    | sema domain, transmembrane domain (TM), i       | Multiple_Complex |
| TC0100011242.hg.1    | 8.8   | 8     | 1.74  | 9.16E-05 | 0.0005 | TMEM183F  | transmembrane protein 183A                      | Multiple_Complex |
| TC0100016678.hg.1    | 15.17 | 13.26 | 3.77  | 9.17E-05 | 0.0005 | FAM129A   | family with sequence similarity 129, member     | Multiple_Complex |
| TC0600011136.hg.1    | 7.82  | 6.39  | 2.69  | 9.24E-05 | 0.0005 | HIST1H2BG | histone cluster 1, H2bg                         | Multiple_Complex |
| TC1100009091.hg.1    | 5.18  | 4.42  | 1.69  | 9.26E-05 | 0.0005 | CLDN25    | claudin 25                                      | Coding           |
| TC1200009649.hg.1    | 7.48  | 8.03  | -1.47 | 9.26E-05 | 0.0005 | CRACR2A   | calcium release activated channel regulator 2/  | Multiple_Complex |
| TC0100013287.hg.1    | 5.73  | 6.7   | -1.95 | 9.29E-05 | 0.0005 | E2F2      | E2F transcription factor 2                      | Multiple_Complex |
| TC1600007814.hg.1    | 7.19  | 8.04  | -1.81 | 9.30E-05 | 0.0005 | ADCY7     | adenylate cyclase 7                             | Multiple_Complex |
| TC2100008165.hg.1    | 8.49  | 9.32  | -1.77 | 9.32E-05 | 0.0005 | BRWD1     | bromodomain and WD repeat domain contain        | Multiple_Complex |
| TC0100008536.hg.1    | 5.85  | 6.71  | -1.82 | 9.32E-05 | 0.0005 | INADL     | InaD-like (Drosophila)                          | Multiple_Complex |
| TC0500007337.hg.1    | 14.1  | 15.25 | -2.21 | 9.33E-05 | 0.0005 | PARP8     | poly(ADP-ribose) polymerase family member       | Multiple_Complex |
| TC0300008088.hg.1    | 4.35  | 5.1   | -1.68 | 9.33E-05 | 0.0005 | CRYBG3    | crystallin beta-gamma domain containing 3       | Multiple_Complex |
| TC1700010618.hg.1    | 6.29  | 5.22  | 2.11  | 9.35E-05 | 0.0005 | TOP2A     | topoisomerase (DNA) II alpha                    | Multiple_Complex |
| TC0300010076.hg.1    | 11.53 | 8.72  | 7.02  | 9.39E-05 | 0.0005 | RPL35A    | ribosomal protein L35a                          | Multiple_Complex |
| TC0200010164.hg.1    | 6.71  | 5.6   | 2.16  | 9.42E-05 | 0.0005 | SSFA2     | sperm specific antigen 2                        | Multiple_Complex |
| TC0900008847.hg.1    | 9.98  | 7.41  | 5.92  | 9.43E-05 | 0.0005 | LCN2      | lipocalin 2                                     | Multiple_Complex |
| TC1500008983.hg.1    | 13.34 | 12.53 | 1.75  | 9.44E-05 | 0.0005 | SLC12A6   | solute carrier family 12 (potassium/chloride tr | Multiple_Complex |
| TC0100018553.hg.1    | 6.89  | 6.33  | 1.48  | 9.50E-05 | 0.0005 | PLEKHA6   | pleckstrin homology domain containing, famil    | Multiple_Complex |
| TSUnmapped00000480.h | 6.98  | 7.69  | -1.64 | 9.55E-05 | 0.0005 | ZNF780B   | zinc finger protein 780B                        | Coding           |
| TC1200011301.hg.1    | 8.49  | 7.71  | 1.71  | 9.56E-05 | 0.0005 | KRR1      | KRR1, small subunit (SSU) processome compo      | Multiple_Complex |
| TC0700008560.hg.1    | 11.97 | 10.9  | 2.1   | 9.56E-05 | 0.0005 | GNB2      | guanine nucleotide binding protein (G protein   | Multiple_Complex |
| TC0600007384.hg.1    | 5.29  | 4.33  | 1.95  | 9.57E-05 | 0.0005 | HIST1H2BC | histone cluster 1, H2bo                         | Coding           |
| TC1700012092.hg.1    | 5.67  | 6.28  | -1.53 | 9.61E-05 | 0.0005 | DUS1L     | dihydrouridine synthase 1-like                  | Multiple_Complex |
| TC1400008036.hg.1    | 5.65  | 5.04  | 1.53  | 9.63E-05 | 0.0005 | COX8C     | cytochrome c oxidase subunit VIII               | Coding           |
| TC1100009827.hg.1    | 5.14  | 5.88  | -1.66 | 9.69E-05 | 0.0005 | OSBPL5    | oxysterol binding protein-like 5                | Multiple_Complex |
| TC0100016656.hg.1    | 13.72 | 12.61 | 2.16  | 9.72E-05 | 0.0005 | NCF2      | neutrophil cytosolic factor 2                   | Multiple_Complex |
| TC2000008268.hg.1    | 6.35  | 7.39  | -2.05 | 9.73E-05 | 0.0005 | SLC23A2   | solute carrier family 23 (ascorbic acid transpo | Multiple_Complex |
| TC0400006462.hg.1    | 4.91  | 5.85  | -1.91 | 9.77E-05 | 0.0005 | PIGG      | phosphatidylinositol glycan anchor biosynthes   | Multiple_Complex |
| TC0100013384.hg.1    | 4.59  | 6.68  | -4.25 | 9.77E-05 | 0.0005 | ZNF683    | zinc finger protein 683                         | Coding           |
| TSUnmapped00000461.h | 5.2   | 5.94  | -1.67 | 9.81E-05 | 0.0005 | ZNF35     | zinc finger protein 35                          | Coding           |
| TC0X00007353.hg.1    | 6.54  | 7.32  | -1.71 | 9.83E-05 | 0.0006 | TSR2      | TSR2, 20S rRNA accumulation, homolog (S. cei    | Coding           |
| TC0700007949.hg.1    | 8.31  | 9.79  | -2.81 | 9.83E-05 | 0.0006 | POM121    | POM121 transmembrane nucleoporin                | Multiple_Complex |
| TC1300007104.hg.1    | 6.6   | 7.68  | -2.11 | 9.83E-05 | 0.0006 | LRCH1     | leucine-rich repeats and calponin homology (C   | Multiple_Complex |
| TC0300012166.hg.1    | 14.01 | 12.87 | 2.22  | 9.84E-05 | 0.0006 | HCLS1     | hematopoietic cell-specific Lyn substrate 1     | Multiple_Complex |
| TC0200006647.hg.1    | 6.12  | 7.01  | -1.86 | 9.90E-05 | 0.0006 | CPSF3     | cleavage and polyadenylation specific factor 3  | Multiple_Complex |
| TC1100012353.hg.1    | 4.87  | 5.65  | -1.72 | 9.91E-05 | 0.0006 | ZW10      | zw10 kinetochore protein                        | Multiple_Complex |
| TC0400006578.hg.1    | 11.08 | 11.86 | -1.72 | 9.92E-05 | 0.0006 | SH3BP2    | SH3-domain binding protein 2                    | Multiple_Complex |
| TC0600014333.hg.1    | 8.63  | 7.71  | 1.88  | 9.92E-05 | 0.0006 | MICAL1    | microtubule associated monoxygenase, calpr      | Multiple_Complex |
| TC1000012429.hg.1    | 7.61  | 6.63  | 1.97  | 9.98E-05 | 0.0006 | PRPF18    | pre-mRNA processing factor 18                   | Multiple_Complex |
| TC1900011196.hg.1    | 5.11  | 5.94  | -1.77 | 0.0001   | 0.0006 | NAPSA     | napsin A aspartic peptidase                     | Multiple_Complex |
| TC0600011546.hg.1    | 8.37  | 9.29  | -1.9  | 0.0001   | 0.0006 | CUTA      | cutA divalent cation tolerance homolog (E. col  | Multiple_Complex |
| TC1900012026.hg.1    | 6.41  | 7.09  | -1.6  | 0.0001   | 0.0006 | ZNF468    | zinc finger protein 468                         | Multiple_Complex |
| TC0100009414.hg.1    | 10.87 | 9.48  | 2.62  | 0.0001   | 0.0006 | ATP5F1    | ATP synthase, H+ transporting, mitochondrial    | Multiple_Complex |
| TC0100014245.hg.1    | 8.83  | 8.15  | 1.6   | 0.0001   | 0.0006 | YIPF1     | Yip1 domain family member 1                     | Multiple_Complex |
| TC0100013323.hg.1    | 4.8   | 5.72  | -1.89 | 0.0001   | 0.0006 | STPG1     | sperm-tail PG-rich repeat containing 1          | Multiple_Complex |
| TC1100008370.hg.1    | 7.66  | 6.54  | 2.17  | 0.0001   | 0.0006 | ATG16L2   | autophagy related 16-like 2                     | Multiple_Complex |
| TC0100009116.hg.1    | 5.5   | 6.33  | -1.77 | 0.0001   | 0.0006 | RWD3; TR  | RWD domain containing 3; transmembrane pr       | Multiple_Complex |

|                      |       |       |        |        |        |            |                                                   |                  |
|----------------------|-------|-------|--------|--------|--------|------------|---------------------------------------------------|------------------|
| TC0300010943.hg.1    | 10.2  | 12.21 | -4.03  | 0.0001 | 0.0006 | CCR1       | chemokine (C-C motif) receptor 1                  | Coding           |
| TC0200016584.hg.1    | 6.95  | 5.71  | 2.37   | 0.0001 | 0.0006 | HSP61      | heat shock 10kDa protein 1                        | Multiple_Complex |
| TC1100009122.hg.1    | 5.1   | 3.95  | 2.22   | 0.0001 | 0.0006 | NXPE2      | neurexophilin and PC-esterase domain family,      | Multiple_Complex |
| TC1400010171.hg.1    | 7.9   | 7.11  | 1.73   | 0.0001 | 0.0006 | CCDC85C    | coiled-coil domain containing 85C                 | Multiple_Complex |
| TC0600009800.hg.1    | 10.26 | 9.3   | 1.94   | 0.0001 | 0.0006 | GINM1      | glycoprotein integral membrane 1                  | Multiple_Complex |
| TC1300008633.hg.1    | 10.44 | 11.45 | -2.02  | 0.0001 | 0.0006 | SUPT20H    | SPT20 homolog, SAGA complex component             | Multiple_Complex |
| TC0800012392.hg.1    | 9.73  | 10.43 | -1.62  | 0.0001 | 0.0006 | CNOT7      | CCR4-NOT transcription complex subunit 7          | Multiple_Complex |
| TC0X00009795.hg.1    | 13.29 | 16.78 | -11.19 | 0.0001 | 0.0006 | ALAS2      | 5-aminolevulinate synthase 2                      | Multiple_Complex |
| TC2200007468.hg.1    | 4.22  | 5.01  | -1.73  | 0.0001 | 0.0006 | TEF        | thyrotrophic embryonic factor                     | Multiple_Complex |
| TC0500012977.hg.1    | 9.34  | 8.42  | 1.89   | 0.0001 | 0.0006 | PDLIM7     | PDZ and LIM domain 7 (enigma)                     | Multiple_Complex |
| TSUnmapped00000123.h | 5.05  | 5.75  | -1.63  | 0.0001 | 0.0006 | SLC2A6     | solute carrier family 2 (facilitated glucose tran | Coding           |
| TC1900007820.hg.1    | 4.76  | 5.75  | -1.99  | 0.0001 | 0.0006 | ZNF181     | zinc finger protein 181                           | Multiple_Complex |
| TSUnmapped00000113.h | 8.3   | 6.87  | 2.7    | 0.0001 | 0.0006 | PADI4      | peptidyl arginine deiminase, type IV              | Coding           |
| TC0300007255.hg.1    | 4.42  | 6.51  | -4.27  | 0.0001 | 0.0006 | CCR3       | chemokine (C-C motif) receptor 3                  | Multiple_Complex |
| TC0700007870.hg.1    | 6.6   | 7.34  | -1.67  | 0.0001 | 0.0006 | STAG3L4    | stromal antigen 3-like 4 (pseudogene)             | Multiple_Complex |
| TC1400008591.hg.1    | 7.88  | 7.1   | 1.73   | 0.0001 | 0.0006 | TMEM55B    | transmembrane protein 55B                         | Multiple_Complex |
| TC0900011829.hg.1    | 6.52  | 7.67  | -2.22  | 0.0001 | 0.0006 | RALGDS     | ral guanine nucleotide dissociation stimulator    | Multiple_Complex |
| TC0300006575.hg.1    | 5.63  | 6.43  | -1.74  | 0.0001 | 0.0006 | FANCD2     | Fanconi anemia complementation group D2           | Multiple_Complex |
| TC0100008803.hg.1    | 6.73  | 7.53  | -1.74  | 0.0001 | 0.0006 | FAM73A     | family with sequence similarity 73, member A      | Multiple_Complex |
| TSUnmapped00000369.h | 6.71  | 7.43  | -1.64  | 0.0001 | 0.0006 | ZNF780B    | zinc finger protein 780B                          | Coding           |
| TC1700007620.hg.1    | 6.02  | 7.36  | -2.54  | 0.0001 | 0.0006 | CCL4L2; CC | chemokine (C-C motif) ligand 4-like 2; chemok     | Multiple_Complex |
| TC1500007077.hg.1    | 5.34  | 6.28  | -1.92  | 0.0001 | 0.0006 | WDR76      | WD repeat domain 76                               | Multiple_Complex |
| TC1100011966.hg.1    | 7.57  | 6.88  | 1.6    | 0.0001 | 0.0006 | SLC36A4    | solute carrier family 36 (proton/amino acid sy    | Multiple_Complex |
| TC1600011387.hg.1    | 9.2   | 8.61  | 1.51   | 0.0001 | 0.0006 | STX4       | syntaxin 4                                        | Multiple_Complex |
| TC1000009327.hg.1    | 4.29  | 4.73  | -1.36  | 0.0001 | 0.0006 | MGMT       | O-6-methylguanine-DNA methyltransferase           | Multiple_Complex |
| TC1300006683.hg.1    | 12.38 | 13.25 | -1.83  | 0.0001 | 0.0006 | GTF3A      | general transcription factor IIIA                 | Multiple_Complex |
| TC1400007259.hg.1    | 9.99  | 8.78  | 2.31   | 0.0001 | 0.0006 | PELI2      | pellino E3 ubiquitin protein ligase family mem    | Multiple_Complex |
| TC0300012393.hg.1    | 9.97  | 9.14  | 1.78   | 0.0001 | 0.0006 | MBD4       | methyl-CpG binding domain 4 DNA glycosylas        | Multiple_Complex |
| TC0800007414.hg.1    | 12.22 | 11.48 | 1.67   | 0.0001 | 0.0006 | GOLGA7     | golgin A7                                         | Multiple_Complex |
| TC0700009317.hg.1    | 7.56  | 8.53  | -1.97  | 0.0001 | 0.0006 | TRIM24     | tripartite motif containing 24                    | Multiple_Complex |
| TC1200007809.hg.1    | 3.95  | 4.69  | -1.67  | 0.0001 | 0.0006 | GDF11      | growth differentiation factor 11                  | Coding           |
| TC1200011699.hg.1    | 6.57  | 7.31  | -1.67  | 0.0001 | 0.0006 | ARL1       | ADP-ribosylation factor like GTPase 1             | Multiple_Complex |
| TC0300010999.hg.1    | 8.79  | 10.22 | -2.68  | 0.0001 | 0.0006 | MAP4       | microtubule associated protein 4                  | Multiple_Complex |
| TC0100007038.hg.1    | 7.81  | 8.74  | -1.9   | 0.0001 | 0.0006 | NECAP2     | NECAP endocytosis associated 2                    | Multiple_Complex |
| TC1700008133.hg.1    | 10.91 | 11.92 | -2.01  | 0.0001 | 0.0006 | KPNB1      | karyopherin (importin) beta 1                     | Multiple_Complex |
| TC1000009685.hg.1    | 4.51  | 5.17  | -1.58  | 0.0001 | 0.0006 | ANKRD16    | ankyrin repeat domain 16                          | Multiple_Complex |
| TC0200013535.hg.1    | 5.7   | 6.39  | -1.61  | 0.0001 | 0.0006 | LMAN2L     | lectin, mannose-binding 2-like                    | Multiple_Complex |
| TC0600008156.hg.1    | 7.21  | 8.78  | -2.99  | 0.0001 | 0.0006 | ENPP4      | ectonucleotide pyrophosphatase/phosphodie         | Coding           |
| TC1700007907.hg.1    | 5.38  | 6.02  | -1.56  | 0.0001 | 0.0006 | TUBG2      | tubulin, gamma 2                                  | Multiple_Complex |
| TC1400008635.hg.1    | 7.37  | 8.26  | -1.86  | 0.0001 | 0.0006 | RAB2B      | RAB2B, member RAS oncogene family                 | Multiple_Complex |
| TC1400008625.hg.1    | 15.71 | 14.81 | 1.88   | 0.0001 | 0.0006 | HNRNPC     | heterogeneous nuclear ribonucleoprotein C (C      | Multiple_Complex |
| TC1900011582.hg.1    | 4.85  | 5.54  | -1.61  | 0.0001 | 0.0006 | ZNF671     | zinc finger protein 671                           | Multiple_Complex |
| TC1000010065.hg.1    | 7.36  | 6.03  | 2.52   | 0.0001 | 0.0006 | ARHGAP21   | Rho GTPase activating protein 21                  | Multiple_Complex |
| TC0600014328.hg.1    | 10.31 | 11.49 | -2.27  | 0.0001 | 0.0006 | OSTM1      | osteopetrosis associated transmembrane prot       | Multiple_Complex |
| TC0100014203.hg.1    | 5.86  | 6.94  | -2.13  | 0.0001 | 0.0006 | ZCCHC11    | zinc finger, CCHC domain containing 11            | Multiple_Complex |
| TC0800011683.hg.1    | 5.86  | 6.75  | -1.86  | 0.0001 | 0.0006 | FBXO32     | F-box protein 32                                  | Multiple_Complex |
| TC0900008804.hg.1    | 5.01  | 5.88  | -1.82  | 0.0001 | 0.0006 | ZNF79      | zinc finger protein 79                            | Multiple_Complex |
| TC0600007375.hg.1    | 8.93  | 7.47  | 2.76   | 0.0001 | 0.0006 | HIST1H3H   | histone cluster 1, H3h                            | Coding           |
| TC1500007885.hg.1    | 6.4   | 5.6   | 1.74   | 0.0001 | 0.0006 | NEIL1      | nei-like DNA glycosylase 1                        | Multiple_Complex |
| TC0900009679.hg.1    | 3.71  | 4.71  | -2.01  | 0.0001 | 0.0006 | MLLT3      | Jeck2013 ALT_ACCEPTOR, ALT_DONOR, codin           | NonCoding        |
| TC1800009258.hg.1    | 6.77  | 7.33  | -1.48  | 0.0001 | 0.0006 | ZNF519     | zinc finger protein 519                           | Multiple_Complex |
| TC0500008568.hg.1    | 6     | 6.83  | -1.78  | 0.0001 | 0.0006 | SLC12A2    | solute carrier family 12 (sodium/potassium/cf     | Multiple_Complex |
| TC0400006579.hg.1    | 11.25 | 12.23 | -1.96  | 0.0001 | 0.0006 | ADD1       | adducin 1 (alpha)                                 | Multiple_Complex |
| TC1200010788.hg.1    | 4.67  | 5.51  | -1.79  | 0.0001 | 0.0006 | SPRYD3     | SPRY domain containing 3                          | Multiple_Complex |
| TC0100017722.hg.1    | 5.85  | 6.74  | -1.85  | 0.0001 | 0.0006 | C1orf131   | chromosome 1 open reading frame 131               | Multiple_Complex |
| TC1200012739.hg.1    | 7.91  | 8.93  | -2.03  | 0.0001 | 0.0006 | PARP11     | poly(ADP-ribose) polymerase family member         | Multiple_Complex |
| TC1000011524.hg.1    | 12.76 | 11.8  | 1.95   | 0.0001 | 0.0006 | PIK3AP1    | phosphoinositide-3-kinase adaptor protein 1       | Multiple_Complex |
| TC1100013165.hg.1    | 7.84  | 8.81  | -1.96  | 0.0001 | 0.0006 | SLC43A3    | solute carrier family 43, member 3                | Multiple_Complex |
| TC0100010586.hg.1    | 3.67  | 4.26  | -1.5   | 0.0001 | 0.0006 | FMO4       | flavin containing monooxygenase 4                 | Multiple_Complex |
| TC0400009543.hg.1    | 4.86  | 6.08  | -2.34  | 0.0001 | 0.0006 | TLR3       | toll-like receptor 3                              | Multiple_Complex |
| TC2200008036.hg.1    | 3.79  | 8.17  | -20.85 | 0.0001 | 0.0006 | USP41      | ubiquitin specific peptidase 41                   | Multiple_Complex |
| TC0100016963.hg.1    | 9.92  | 9     | 1.9    | 0.0001 | 0.0006 | KDM5B      | lysine (K)-specific demethylase 5B                | Multiple_Complex |
| TC0500013415.hg.1    | 7.82  | 7.11  | 1.63   | 0.0001 | 0.0006 | RAB24      | RAB24, member RAS oncogene family                 | Multiple_Complex |
| TC0100007365.hg.1    | 5.87  | 6.58  | -1.63  | 0.0001 | 0.0006 | NIPAL3     | NIPA-like domain containing 3                     | Multiple_Complex |
| TC2200009317.hg.1    | 6.41  | 7.01  | -1.52  | 0.0001 | 0.0006 | KLHL22     | kelch-like family member 22                       | Multiple_Complex |
| TC1200012863.hg.1    | 7.61  | 8.72  | -2.17  | 0.0001 | 0.0006 | CCDC92     | coiled-coil domain containing 92                  | NonCoding        |
| TC0700007137.hg.1    | 5.2   | 6.49  | -2.44  | 0.0001 | 0.0006 | BBS9       | Bardet-Biedl syndrome 9                           | Multiple_Complex |
| TC1500007060.hg.1    | 4.9   | 4.1   | 1.74   | 0.0001 | 0.0006 | MAP1A      | microtubule associated protein 1A                 | Multiple_Complex |
| TC0500007868.hg.1    | 6.93  | 7.81  | -1.85  | 0.0001 | 0.0006 | SCAMP1     | secretory carrier membrane protein 1              | Multiple_Complex |
| TC1400009388.hg.1    | 9.01  | 9.78  | -1.7   | 0.0001 | 0.0006 | PPP2R5E    | protein phosphatase 2, regulatory subunit B, ε    | Multiple_Complex |

|                      |       |       |       |        |                    |                                                  |                  |
|----------------------|-------|-------|-------|--------|--------------------|--------------------------------------------------|------------------|
| TC1100011543.hg.1    | 8.51  | 7.66  | 1.8   | 0.0001 | 0.0006 LAMTOR1     | late endosomal/lysosomal adaptor, MAPK anc       | Multiple_Complex |
| TC1900011716.hg.1    | 4.6   | 4.94  | -1.27 | 0.0001 | 0.0007 LRFN3       | leucine rich repeat and fibronectin type III dor | Coding           |
| TC0X00008827.hg.1    | 9.72  | 8.75  | 1.95  | 0.0001 | 0.0007 FLNA        | Memczak2013 ANTISENSE, CDS, coding, INTEF        | NonCoding        |
| TC0900009905.hg.1    | 4.32  | 3.79  | 1.45  | 0.0001 | 0.0007 CNTFR       | ciliary neurotrophic factor receptor             | Multiple_Complex |
| TC1600011569.hg.1    | 6.91  | 7.52  | -1.52 | 0.0001 | 0.0007 ADAT1       | adenosine deaminase, tRNA-specific 1             | Multiple_Complex |
| TC0200016507.hg.1    | 5.3   | 4.75  | 1.46  | 0.0001 | 0.0007 LIMS3L; LIM | LIM and senescent cell antigen-like domains 3    | Multiple_Complex |
| TC0900009844.hg.1    | 9.64  | 8.64  | 2.01  | 0.0001 | 0.0007 SMU1        | smu-1 suppressor of mec-8 and unc-52 homol       | Multiple_Complex |
| TC1200009928.hg.1    | 3.97  | 5.15  | -2.27 | 0.0001 | 0.0007 TAS2R19     | taste receptor, type 2, member 19                | Coding           |
| TC1900007067.hg.1    | 6.86  | 6.05  | 1.75  | 0.0001 | 0.0007 ZNF136      | zinc finger protein 136                          | Multiple_Complex |
| TC1600007348.hg.1    | 6.91  | 8.14  | -2.36 | 0.0001 | 0.0007 SGF29       | SAGA complex associated factor 29                | Multiple_Complex |
| TC1600007234.hg.1    | 7.3   | 8.3   | -1.99 | 0.0001 | 0.0007 DCTN5       | dynactin 5 (p25)                                 | Multiple_Complex |
| TC0100017024.hg.1    | 5.04  | 4.42  | 1.53  | 0.0001 | 0.0007 PLEKHA6     | Transcript Identified by AceView, Entrez Gene    | Unassigned       |
| TC1700012286.hg.1    | 5.14  | 6.22  | -2.11 | 0.0001 | 0.0007 SMG8        | SMG8 nonsense mediated mRNA decay factor         | Multiple_Complex |
| TC0600007377.hg.1    | 9.81  | 11.58 | -3.43 | 0.0001 | 0.0007 HIST1H2BM   | histone cluster 1, H2bm                          | Coding           |
| TC0600011878.hg.1    | 5.52  | 6.55  | -2.04 | 0.0001 | 0.0007 XPO5        | exportin 5                                       | Multiple_Complex |
| TC0900010589.hg.1    | 6.16  | 5.09  | 2.1   | 0.0001 | 0.0007 HNRNPK      | Zhang2013 ALT_ACCEPTOR, ALT_DONOR, cod           | NonCoding        |
| TC0200011219.hg.1    | 4.87  | 6.32  | -2.73 | 0.0001 | 0.0007 ACKR3       | atypical chemokine receptor 3                    | Multiple_Complex |
| TC0400009818.hg.1    | 10.64 | 9.98  | 1.59  | 0.0001 | 0.0007 LRPAP1      | LDL receptor related protein associated protei   | Multiple_Complex |
| TC1700007016.hg.1    | 6.89  | 7.63  | -1.67 | 0.0001 | 0.0007 TRPV2       | transient receptor potential cation channel, su  | Multiple_Complex |
| TC1500010893.hg.1    | 6.86  | 7.69  | -1.78 | 0.0001 | 0.0007 PTPN9       | protein tyrosine phosphatase, non-receptor ty    | Multiple_Complex |
| TC0900011523.hg.1    | 12.66 | 11.64 | 2.02  | 0.0001 | 0.0007 HSPA5       | heat shock 70kDa protein 5 (glucose-regulate     | Multiple_Complex |
| TC1100009840.hg.1    | 6.82  | 7.55  | -1.66 | 0.0001 | 0.0007 ZNF195      | zinc finger protein 195                          | Multiple_Complex |
| TSUnmapped00000527.h | 4.81  | 5.72  | -1.87 | 0.0001 | 0.0007 LRIG1       |                                                  | Coding           |
| TC0300007617.hg.1    | 6.55  | 7.5   | -1.93 | 0.0001 | 0.0007 KCTD6       | potassium channel tetramerization domain co      | Multiple_Complex |
| TC1900009186.hg.1    | 5.29  | 4.68  | 1.53  | 0.0001 | 0.0007 ATP8B3      | ATPase, aminophospholipid transporter, class     | Multiple_Complex |
| TSUnmapped00000450.h | 6.22  | 5.34  | 1.84  | 0.0001 | 0.0007 RPS6KA1     | ribosomal protein S6 kinase, 90kDa, polypepti    | NonCoding        |
| TC0X00008070.hg.1    | 4.09  | 4.8   | -1.63 | 0.0001 | 0.0007 FRMPD3      | FERM and PDZ domain containing 3                 | Multiple_Complex |
| TC0800008194.hg.1    | 4.6   | 3.91  | 1.62  | 0.0001 | 0.0007 NECAB1      | N-terminal EF-hand calcium binding protein 1     | Multiple_Complex |
| TC0600010066.hg.1    | 12.22 | 10.63 | 3.01  | 0.0001 | 0.0007 IGF2R       | insulin-like growth factor 2 receptor            | Multiple_Complex |
| TC0100008779.hg.1    | 6.44  | 5.7   | 1.66  | 0.0001 | 0.0007 ST6GALNA4   | ST6 (alpha-N-acetyl-neuraminy)l-2,3-beta-gala    | Multiple_Complex |
| TC1600008661.hg.1    | 12.15 | 9.91  | 4.71  | 0.0001 | 0.0007 CRISPLD2    | cysteine-rich secretory protein LCCL domain c    | Multiple_Complex |
| TC0700008246.hg.1    | 11.16 | 11.93 | -1.7  | 0.0001 | 0.0007 DMTF1       | cyclin D binding myb-like transcription factor : | Multiple_Complex |
| TC0100018499.hg.1    | 5.64  | 5.02  | 1.54  | 0.0001 | 0.0007 MUC1        | mucin 1, cell surface associated                 | Multiple_Complex |
| TC0700006945.hg.1    | 6.52  | 5.38  | 2.2   | 0.0001 | 0.0007 MPP6        | membrane protein, palmitoylated 6                | Multiple_Complex |
| TC0300009727.hg.1    | 5.14  | 6.05  | -1.88 | 0.0001 | 0.0007 VPS8        | Transcript Identified by AceView, Entrez Gene    | Unassigned       |
| TC1800008162.hg.1    | 5.13  | 5.83  | -1.62 | 0.0001 | 0.0007 FAM210A     | family with sequence similarity 210, member      | Multiple_Complex |
| TC2200008881.hg.1    | 5.41  | 6.41  | -2.01 | 0.0001 | 0.0007 RRP7A       | ribosomal RNA processing 7 homolog A             | Multiple_Complex |
| TC1800007696.hg.1    | 5.25  | 5.96  | -1.64 | 0.0001 | 0.0007 TSHZ1       | teashirt zinc finger homeobox 1                  | Multiple_Complex |
| TC0200009923.hg.1    | 5.79  | 6.56  | -1.7  | 0.0001 | 0.0007 UBR3        | Transcript Identified by AceView, Entrez Gene    | Unassigned       |
| TC1300008892.hg.1    | 7.72  | 9.76  | -4.12 | 0.0001 | 0.0007 LPAR6       | lysophosphatidic acid receptor 6                 | Multiple_Complex |
| TC1000010362.hg.1    | 5.15  | 6.01  | -1.81 | 0.0001 | 0.0007 ZNF248      | zinc finger protein 248                          | Multiple_Complex |
| TC0400008228.hg.1    | 6.16  | 7.12  | -1.95 | 0.0001 | 0.0007 METAP1      | methionyl aminopeptidase 1                       | Multiple_Complex |
| TC1000012482.hg.1    | 12.48 | 11.26 | 2.32  | 0.0001 | 0.0007 ENTPD1      | ectonucleoside triphosphate diphosphohydroly     | Multiple_Complex |
| TC0600010609.hg.1    | 4.35  | 3.44  | 1.88  | 0.0001 | 0.0007 PXDC1       | PX domain containing 1                           | Multiple_Complex |
| TC2200009233.hg.1    | 9     | 8.51  | 1.4   | 0.0001 | 0.0007 ADORA2A     | adenosine A2a receptor                           | Multiple_Complex |
| TC0700010796.hg.1    | 10.15 | 10.88 | -1.66 | 0.0001 | 0.0007 VPS41       | vacuolar protein sorting 41 homolog (S. cerevi   | Multiple_Complex |
| TC1200007182.hg.1    | 9.86  | 8.62  | 2.37  | 0.0001 | 0.0007 FAR2        | fatty acyl-CoA reductase 2                       | Multiple_Complex |
| TC1500009438.hg.1    | 6.47  | 7.55  | -2.11 | 0.0001 | 0.0007 LYSMD2      | LysM, putative peptidoglycan-binding, domain     | Coding           |
| TC0800007681.hg.1    | 7     | 7.73  | -1.67 | 0.0001 | 0.0007 TGS1        | trimethylguanosine synthase 1                    | Multiple_Complex |
| TC1100006500.hg.1    | 8.72  | 9.46  | -1.66 | 0.0001 | 0.0007 AP2A2       | adaptor-related protein complex 2, alpha 2 su    | Multiple_Complex |
| TC0600011853.hg.1    | 5.1   | 4.44  | 1.59  | 0.0001 | 0.0007 MEA1        | male-enhanced antigen 1                          | Multiple_Complex |
| TC0100009331.hg.1    | 10.34 | 9.24  | 2.16  | 0.0001 | 0.0007 STXBP3      | syntaxin binding protein 3                       | Multiple_Complex |
| TC1200011916.hg.1    | 11.91 | 12.83 | -1.88 | 0.0001 | 0.0007 PPP1CC      | protein phosphatase 1, catalytic subunit, gami   | Multiple_Complex |
| TC1500010776.hg.1    | 10.87 | 10.25 | 1.53  | 0.0001 | 0.0007 IDH3A       | isocitrate dehydrogenase 3 (NAD+) alpha          | Multiple_Complex |
| TC0600008972.hg.1    | 12.72 | 13.97 | -2.37 | 0.0001 | 0.0007 PRDM1       | PR domain containing 1, with ZNF domain          | Multiple_Complex |
| TC2000008072.hg.1    | 7.03  | 8.2   | -2.25 | 0.0001 | 0.0007 PDPF        | pancreatic progenitor cell differentiation and   | Multiple_Complex |
| TC0900012295.hg.1    | 5.72  | 6.47  | -1.67 | 0.0001 | 0.0007 TMEM203     | transmembrane protein 203                        | Coding           |
| TC0600011248.hg.1    | 4.2   | 4.84  | -1.55 | 0.0001 | 0.0007 ZKSCAN4     | zinc finger with KRAB and SCAN domains 4         | Multiple_Complex |
| TC0400012015.hg.1    | 6.56  | 7.89  | -2.51 | 0.0001 | 0.0007 GYPE        | glycophorin E (MNS blood group)                  | Multiple_Complex |
| TC0500009010.hg.1    | 4.88  | 5.89  | -2.01 | 0.0001 | 0.0007 TCEG1       | Transcript Identified by AceView, Entrez Gene    | Unassigned       |
| TC0100013629.hg.1    | 6.47  | 7.36  | -1.85 | 0.0001 | 0.0007 YARS        | tyrosyl-tRNA synthetase                          | Multiple_Complex |
| TC0500011483.hg.1    | 10.92 | 9.83  | 2.12  | 0.0001 | 0.0007 MCTP1       | multiple C2 domains, transmembrane 1             | Multiple_Complex |
| TC0200013104.hg.1    | 7.91  | 8.38  | -1.39 | 0.0001 | 0.0007 MOGS        | mannosyl-oligosaccharide glucosidase             | Multiple_Complex |
| TC0400010484.hg.1    | 10.03 | 10.75 | -1.65 | 0.0001 | 0.0007 PDSSA       | PDSS cohesin associated factor A                 | Multiple_Complex |
| TC0200007446.hg.1    | 8.92  | 9.99  | -2.11 | 0.0001 | 0.0007 PRKCE       | protein kinase C, epsilon                        | Multiple_Complex |
| TC1500010737.hg.1    | 9.01  | 8.27  | 1.68  | 0.0001 | 0.0007 SQRDL       | sulfide quinone reductase-like (yeast)           | Multiple_Complex |
| TC0400008785.hg.1    | 6.36  | 5.77  | 1.51  | 0.0001 | 0.0007 NOCT        | nocturnin                                        | Multiple_Complex |
| TC0300011540.hg.1    | 5.85  | 6.74  | -1.86 | 0.0001 | 0.0007 SHQ1        | SHQ1, H/ACA ribonucleoprotein assembly fact      | Multiple_Complex |
| TC1200007406.hg.1    | 9.23  | 10.13 | -1.86 | 0.0001 | 0.0007 IRAK4       | interleukin 1 receptor associated kinase 4       | Multiple_Complex |
| TC1200012864.hg.1    | 7.96  | 8.73  | -1.71 | 0.0001 | 0.0008 CCDC92      | coiled-coil domain containing 92                 | Multiple_Complex |

|                      |       |       |       |        |                   |                                                  |                  |
|----------------------|-------|-------|-------|--------|-------------------|--------------------------------------------------|------------------|
| TC1100013227.hg.1    | 3.18  | 3.86  | -1.59 | 0.0001 | 0.0008 FDXACB1    | ferredoxin-fold anticodon binding domain con     | Multiple_Complex |
| TC2200007271.hg.1    | 13.47 | 12.34 | 2.19  | 0.0001 | 0.0008 NCF4       | neutrophil cytosolic factor 4                    | Multiple_Complex |
| TC0500013296.hg.1    | 5.76  | 6.37  | -1.53 | 0.0001 | 0.0008 C1QTNF3-A  | C1QTNF3-AMACR readthrough (NMD candida           | Multiple_Complex |
| TC0800009236.hg.1    | 6.57  | 5.7   | 1.83  | 0.0001 | 0.0008 EXOSC4; M  | exosome component 4; microRNA 6847               | Multiple_Complex |
| TC0800009819.hg.1    | 10.75 | 11.72 | -1.96 | 0.0001 | 0.0008 DOK2       | docking protein 2                                | Multiple_Complex |
| TC0300006471.hg.1    | 4.76  | 5.41  | -1.57 | 0.0001 | 0.0008 SETMAR     | SET domain and mariner transposase fusion g      | Multiple_Complex |
| TC0X00007540.hg.1    | 4.97  | 5.74  | -1.71 | 0.0001 | 0.0008 DLG3       | discs, large homolog 3 (Drosophila)              | Multiple_Complex |
| TC0100017668.hg.1    | 6.28  | 7.27  | -1.98 | 0.0001 | 0.0008 TAF5L      | TAF5-like RNA polymerase II, p300/CBP-associ     | Multiple_Complex |
| TC0400009518.hg.1    | 5.68  | 6.24  | -1.48 | 0.0001 | 0.0008 SLC25A4    | solute carrier family 25 (mitochondrial carrier; | Multiple_Complex |
| TC1200012706.hg.1    | 5.66  | 6.55  | -1.85 | 0.0001 | 0.0008 ACAD10     | acyl-CoA dehydrogenase family, member 10         | Multiple_Complex |
| TC1400009426.hg.1    | 13.02 | 12.22 | 1.75  | 0.0001 | 0.0008 MAX        | MYC associated factor X                          | Multiple_Complex |
| TC0300006544.hg.1    | 7.46  | 8.14  | -1.6  | 0.0001 | 0.0008 SETD5      | SET domain containing 5                          | Multiple_Complex |
| TC1900007004.hg.1    | 5.75  | 6.42  | -1.6  | 0.0001 | 0.0008 C19orf52   | chromosome 19 open reading frame 52              | Multiple_Complex |
| TC0400012880.hg.1    | 6.41  | 5.34  | 2.1   | 0.0001 | 0.0008 DUX4       | double homeobox 4                                | Multiple_Complex |
| TC0100015796.hg.1    | 7.47  | 6.01  | 2.74  | 0.0001 | 0.0008 POGZ       | Transcript Identified by AceView, Entrez Gene    | Unassigned       |
| TC1100009026.hg.1    | 7.09  | 7.55  | -1.38 | 0.0001 | 0.0008 SIK2       | salt-inducible kinase 2                          | Multiple_Complex |
| TC0100017436.hg.1    | 4.5   | 5.58  | -2.12 | 0.0001 | 0.0008 TAF1A      | TATA box binding protein (TBP)-associated fac    | Multiple_Complex |
| TSUnmapped00000223.h | 4.95  | 4.72  | 1.17  | 0.0001 | 0.0008 RPS6KA1    | ribosomal protein S6 kinase, 90kDa, polypepti    | NonCoding        |
| TC1600006666.hg.1    | 8.26  | 9.08  | -1.76 | 0.0001 | 0.0008 CASP16P    | caspase 16, pseudogene                           | Multiple_Complex |
| TC1900007831.hg.1    | 5.29  | 5.85  | -1.47 | 0.0001 | 0.0008 HPN        | hepsin                                           | Multiple_Complex |
| TC1200007897.hg.1    | 8.6   | 9.31  | -1.63 | 0.0001 | 0.0008 TSPAN31    | tetraspanin 31                                   | Multiple_Complex |
| TC1600011426.hg.1    | 9.3   | 8.63  | 1.58  | 0.0001 | 0.0008 ATXN1L     | ataxin 1-like                                    | Multiple_Complex |
| TC0300009701.hg.1    | 8.44  | 7.88  | 1.47  | 0.0001 | 0.0008 PSMD2      | proteasome 26S subunit, non-ATPase 2             | Multiple_Complex |
| TC1000009612.hg.1    | 14.72 | 13.73 | 1.98  | 0.0001 | 0.0008 KLF6       | Kruppel-like factor 6                            | Multiple_Complex |
| TC0200007872.hg.1    | 5.32  | 6.32  | -2    | 0.0001 | 0.0008 ETAA1      | Ewing tumor-associated antigen 1                 | Multiple_Complex |
| TC1300007565.hg.1    | 8.93  | 7.85  | 2.11  | 0.0001 | 0.0008 SLAIN1     | SLAIN motif family member 1                      | Multiple_Complex |
| TC2000007519.hg.1    | 5.9   | 6.74  | -1.8  | 0.0001 | 0.0008 CD40       | CD40 molecule, TNF receptor superfamily me       | Multiple_Complex |
| TC1500010733.hg.1    | 4.96  | 4.39  | 1.48  | 0.0001 | 0.0008 C15orf48;  | chromosome 15 open reading frame 48; micr        | Multiple_Complex |
| TC1600010778.hg.1    | 3.95  | 3.39  | 1.47  | 0.0001 | 0.0008 HYDIN      | HYDIN, axonemal central pair apparatus prote     | Multiple_Complex |
| TC0X00009980.hg.1    | 7.61  | 6.65  | 1.95  | 0.0001 | 0.0008 CXorf65    | chromosome X open reading frame 65               | Multiple_Complex |
| TC0200015231.hg.1    | 6.34  | 6.85  | -1.43 | 0.0001 | 0.0008 NEMP2      | nuclear envelope integral membrane protein       | Multiple_Complex |
| TC1700008326.hg.1    | 5.87  | 5.02  | 1.81  | 0.0001 | 0.0008 TOM1L1     | target of myb1 like 1 membrane trafficking pr    | Multiple_Complex |
| TC0800012301.hg.1    | 6.07  | 5.5   | 1.49  | 0.0001 | 0.0008 FAM110B    | family with sequence similarity 110, member      | Multiple_Complex |
| TC1100012315.hg.1    | 6.61  | 5.88  | 1.65  | 0.0001 | 0.0008 TIMM8B     | translocase of inner mitochondrial membrane      | Multiple_Complex |
| TC0900008178.hg.1    | 7.31  | 6.58  | 1.66  | 0.0001 | 0.0008 NANS       | N-acetylneuraminic acid synthase                 | Multiple_Complex |
| TC1500007874.hg.1    | 8.75  | 9.99  | -2.36 | 0.0001 | 0.0008 C15orf39   | chromosome 15 open reading frame 39              | Coding           |
| TC0500010497.hg.1    | 5.96  | 6.71  | -1.68 | 0.0001 | 0.0008 NADK2      | NAD kinase 2, mitochondrial                      | Multiple_Complex |
| TC0600008569.hg.1    | 4.34  | 5.35  | -2    | 0.0001 | 0.0008 MYO6       | myosin VI                                        | Multiple_Complex |
| TC1600009183.hg.1    | 6.19  | 7.03  | -1.8  | 0.0001 | 0.0008 ZNF200     | Transcript Identified by AceView, Entrez Gene    | Unassigned       |
| TC0X00008884.hg.1    | 8.81  | 7.88  | 1.9   | 0.0002 | 0.0008 VAMP7      | vesicle associated membrane protein 7            | Multiple_Complex |
| TC1100008661.hg.1    | 6.41  | 7.45  | -2.06 | 0.0002 | 0.0008 EED; MIR67 | embryonic ectoderm development; microRNA         | Multiple_Complex |
| TC0200012648.hg.1    | 10.73 | 11.25 | -1.44 | 0.0002 | 0.0008 PPP4R3B    | protein phosphatase 4, regulatory subunit 3B     | Multiple_Complex |
| TC0900008316.hg.1    | 4.71  | 5.58  | -1.84 | 0.0002 | 0.0008 FKTN       | fukutin                                          | Multiple_Complex |
| TC1400006718.hg.1    | 10.1  | 11.33 | -2.35 | 0.0002 | 0.0008 PSME1      | proteasome activator subunit 1                   | Multiple_Complex |
| TC1700011128.hg.1    | 11.39 | 10.53 | 1.82  | 0.0002 | 0.0008 SPAG9      | sperm associated antigen 9                       | Multiple_Complex |
| TC0800012299.hg.1    | 9.34  | 8.58  | 1.69  | 0.0002 | 0.0008 HOOK3      | hook microtubule-tethering protein 3             | Multiple_Complex |
| TC0200013330.hg.1    | 5.59  | 6.64  | -2.07 | 0.0002 | 0.0008 PLGLB1; PL | plasminogen-like B1; plasminogen-like B2         | Multiple_Complex |
| TC0100010389.hg.1    | 6.2   | 6.94  | -1.67 | 0.0002 | 0.0008 HSD17B7    | hydroxysteroid (17-beta) dehydrogenase 7         | Multiple_Complex |
| TC1400010755.hg.1    | 10.23 | 9.04  | 2.27  | 0.0002 | 0.0008 PSMA3-AS;  | PSMA3 antisense RNA 1                            | Multiple_Complex |
| TC0500013229.hg.1    | 7.47  | 8.02  | -1.46 | 0.0002 | 0.0008 C5orf24    | chromosome 5 open reading frame 24               | Multiple_Complex |
| TC0600007836.hg.1    | 8.61  | 7.97  | 1.56  | 0.0002 | 0.0008 KCTD20     | potassium channel tetramerization domain co      | Multiple_Complex |
| TC1500009395.hg.1    | 6.82  | 7.89  | -2.09 | 0.0002 | 0.0008 TRPM7      | transient receptor potential cation channel, su  | Multiple_Complex |
| TC0100018280.hg.1    | 12.76 | 13.73 | -1.96 | 0.0002 | 0.0008 FAM231D;   | family with sequence similarity 231, member      | Multiple_Complex |
| TC0600014204.hg.1    | 5.65  | 7.14  | -2.83 | 0.0002 | 0.0008 CCR6       | chemokine (C-C motif) receptor 6                 | Coding           |
| TC1400010757.hg.1    | 5.73  | 6.28  | -1.47 | 0.0002 | 0.0008 L3HYPDH    | L-3-hydroxyproline dehydratase (trans-)          | Multiple_Complex |
| TC1100009709.hg.1    | 5.27  | 6.11  | -1.79 | 0.0002 | 0.0008 CHID1      | chitinase domain containing 1                    | Multiple_Complex |
| TC1100011241.hg.1    | 12.27 | 11.59 | 1.6   | 0.0002 | 0.0008 MAP3K11    | mitogen-activated protein kinase kinase kinas    | Multiple_Complex |
| TC1100011375.hg.1    | 5.91  | 6.94  | -2.04 | 0.0002 | 0.0008 C11orf24   | chromosome 11 open reading frame 24              | Multiple_Complex |
| TC0100015803.hg.1    | 5.83  | 6.64  | -1.75 | 0.0002 | 0.0008 TDRKH      | tudor and KH domain containing                   | Multiple_Complex |
| TC0400012854.hg.1    | 5.47  | 6.31  | -1.8  | 0.0002 | 0.0008 TMEM144    | transmembrane protein 144                        | Multiple_Complex |
| TC1900008505.hg.1    | 9.16  | 9.95  | -1.72 | 0.0002 | 0.0008 BAX        | BCL2-associated X protein                        | Multiple_Complex |
| TC1200012161.hg.1    | 4.85  | 4.4   | 1.37  | 0.0002 | 0.0008 TRIAP1     | TP53 regulated inhibitor of apoptosis 1          | Multiple_Complex |
| TC0200013324.hg.1    | 4.47  | 5.45  | -1.97 | 0.0002 | 0.0008 CD8B       | CD8b molecule                                    | Coding           |
| TC1600011147.hg.1    | 5.8   | 6.7   | -1.87 | 0.0002 | 0.0009 MTHFSD     | methenyltetrahydrofolate synthetase domain       | Multiple_Complex |
| TC0600013898.hg.1    | 6.8   | 5.87  | 1.91  | 0.0002 | 0.0009 FAM103A1   | Homo sapiens family with sequence similarity     | Multiple_Complex |
| TC0100009800.hg.1    | 7.4   | 8.27  | -1.82 | 0.0002 | 0.0009 GPR89B     | G protein-coupled receptor 89B                   | Multiple_Complex |
| TC1200010454.hg.1    | 8.69  | 7.25  | 2.72  | 0.0002 | 0.0009 ZCRB1; MIF | zinc finger CCHC-type and RNA binding motif      | Multiple_Complex |
| TC1700007520.hg.1    | 6.07  | 5.73  | 1.26  | 0.0002 | 0.0009 CDK5R1     | cyclin-dependent kinase 5, regulatory subunit    | Multiple_Complex |
| TC1900012018.hg.1    | 6.28  | 6.98  | -1.62 | 0.0002 | 0.0009 ZNF577     | zinc finger protein 577                          | Multiple_Complex |
| TC0300011077.hg.1    | 7.44  | 8.2   | -1.7  | 0.0002 | 0.0009 IP6K1      | inositol hexakisphosphate kinase 1               | Multiple_Complex |

|                      |       |       |       |        |                                                                  |                  |
|----------------------|-------|-------|-------|--------|------------------------------------------------------------------|------------------|
| TC0100012465.hg.1    | 7.34  | 8.03  | -1.6  | 0.0002 | 0.0009 CPSF3L; MI cleavage and polyadenylation specific factor 3 | Multiple_Complex |
| TC0900011445.hg.1    | 7.36  | 6.63  | 1.66  | 0.0002 | 0.0009 PDCL phosphoducin like                                    | Coding           |
| TC0100018261.hg.1    | 6.09  | 7.53  | -2.72 | 0.0002 | 0.0009 GSTM4 glutathione S-transferase mu 4                      | Multiple_Complex |
| TC0300012686.hg.1    | 8.27  | 9.21  | -1.92 | 0.0002 | 0.0009 SLC9A9 solute carrier family 9, subfamily A (NHE9, cat    | Multiple_Complex |
| TC1500007529.hg.1    | 12.78 | 12.05 | 1.66  | 0.0002 | 0.0009 USP3 ubiquitin specific peptidase 3                       | Multiple_Complex |
| TC0100017321.hg.1    | 5.83  | 6.49  | -1.58 | 0.0002 | 0.0009 GPATCH2 G-patch domain containing 2                       | Multiple_Complex |
| TC1100007430.hg.1    | 7.48  | 8.12  | -1.56 | 0.0002 | 0.0009 GYLTL1B glycosyltransferase-like 1B                       | Multiple_Complex |
| TC0900007994.hg.1    | 7.61  | 8.49  | -1.84 | 0.0002 | 0.0009 PHF2 PHD finger protein 2                                 | Multiple_Complex |
| TC1900007695.hg.1    | 8.8   | 9.74  | -1.92 | 0.0002 | 0.0009 URI1 URI1, prefoldin-like chaperone                       | Multiple_Complex |
| TC0100013992.hg.1    | 5.89  | 4.86  | 2.05  | 0.0002 | 0.0009 TCTEX1D4 Tctex1 domain containing 4                       | Coding           |
| TC1100007448.hg.1    | 6.39  | 7.3   | -1.87 | 0.0002 | 0.0009 DGKZ diacylglycerol kinase, zeta                          | Multiple_Complex |
| TC0X00008751.hg.1    | 6.24  | 6.82  | -1.49 | 0.0002 | 0.0009 MAGEA2; MAGE family member A2; MAGE family mem            | Multiple_Complex |
| TC1900008543.hg.1    | 7.53  | 6.75  | 1.72  | 0.0002 | 0.0009 FCGRT Fc fragment of IgG, receptor, transporter, alpr     | Multiple_Complex |
| TC1700012295.hg.1    | 5.31  | 6.18  | -1.83 | 0.0002 | 0.0009 ARSG arylsulfatase G                                      | Multiple_Complex |
| TC1400010577.hg.1    | 6.69  | 5.51  | 2.28  | 0.0002 | 0.0009 NGDN neuroguidin, EIF4E binding protein                   | Multiple_Complex |
| TC0300008755.hg.1    | 4.84  | 4.21  | 1.54  | 0.0002 | 0.0009 GP9 glycoprotein IX (platelet)                            | Coding           |
| TC1000010916.hg.1    | 4.5   | 3.92  | 1.5   | 0.0002 | 0.0009 NPFFR1 neuropeptide FF receptor 1                         | Coding           |
| TC0300006846.hg.1    | 13.1  | 14.36 | -2.39 | 0.0002 | 0.0009 RPL15 ribosomal protein L15                               | Multiple_Complex |
| TC0700006466.hg.1    | 5.03  | 5.77  | -1.67 | 0.0002 | 0.0009 DNAAF5 dynein, axonemal, assembly factor 5                | Multiple_Complex |
| TC0900006758.hg.1    | 8.34  | 9.23  | -1.85 | 0.0002 | 0.0009 DENND4C DENN/MADD domain containing 4C                    | Multiple_Complex |
| TC0800010034.hg.1    | 11.06 | 10.07 | 1.98  | 0.0002 | 0.0009 GSR glutathione reductase                                 | Multiple_Complex |
| TC0100010454.hg.1    | 7.15  | 8.15  | -2    | 0.0002 | 0.0009 MGST3 microsomal glutathione S-transferase 3              | Multiple_Complex |
| TC0100012008.hg.1    | 5.54  | 4.9   | 1.56  | 0.0002 | 0.0009 KCNK1 Transcript Identified by AceView, Entrez Gene       | Unassigned       |
| TC1000007852.hg.1    | 13.56 | 12.55 | 2.02  | 0.0002 | 0.0009 HNRNP3 heterogeneous nuclear ribonucleoprotein H3         | Multiple_Complex |
| TC0Y00007219.hg.1    | 4.79  | 3.58  | 2.31  | 0.0002 | 0.0009 DAZ4; DAZ deleted in azoospermia 4; deleted in azoosper   | Multiple_Complex |
| TC0200014509.hg.1    | 9.9   | 9.02  | 1.84  | 0.0002 | 0.0009 GTDC1 glycosyltransferase like domain containing 1        | Multiple_Complex |
| TC0100018233.hg.1    | 5.49  | 6.31  | -1.77 | 0.0002 | 0.0009 FPGT fucose-1-phosphate guanylyltransferase               | Coding           |
| TC1800008680.hg.1    | 5.81  | 6.8   | -1.98 | 0.0002 | 0.0009 CXXC1 CXXC finger protein 1                               | Multiple_Complex |
| TC1100006771.hg.1    | 9.83  | 11.14 | -2.49 | 0.0002 | 0.0009 EIF3F eukaryotic translation initiation factor 3, subu    | Multiple_Complex |
| TC0800008946.hg.1    | 4.93  | 4.45  | 1.4   | 0.0002 | 0.0009 TG thyroglobulin                                          | Multiple_Complex |
| TC0100009651.hg.1    | 6.44  | 6.98  | -1.45 | 0.0002 | 0.0009 PPIAL4A peptidylprolyl isomerase A (cyclophilin A)-like   | Coding           |
| TC0700013490.hg.1    | 5.71  | 6.27  | -1.48 | 0.0002 | 0.0009 ZNF775 zinc finger protein 775                            | Multiple_Complex |
| TC0600008120.hg.1    | 7.02  | 8.54  | -2.85 | 0.0002 | 0.0009 TMEM63B transmembrane protein 63B                         | Multiple_Complex |
| TC1000010265.hg.1    | 13.96 | 12.93 | 2.04  | 0.0002 | 0.0009 ITGB1 integrin beta 1                                     | Multiple_Complex |
| TC0100018471.hg.1    | 5.71  | 6.3   | -1.51 | 0.0002 | 0.0009 WARS2 tryptophanyl tRNA synthetase 2, mitochondria        | Multiple_Complex |
| TC1200009253.hg.1    | 6.85  | 7.77  | -1.9  | 0.0002 | 0.0009 ATP6VOA2 ATPase, H+ transporting, lysosomal VO subuni     | Multiple_Complex |
| TC1900006994.hg.1    | 9.52  | 8.75  | 1.7   | 0.0002 | 0.0009 DN2 dynamin 2                                             | Multiple_Complex |
| TC0300012132.hg.1    | 12.19 | 11.48 | 1.63  | 0.0002 | 0.0009 GSK3B glycogen synthase kinase 3 beta                     | Multiple_Complex |
| TC1800008707.hg.1    | 7.76  | 8.44  | -1.6  | 0.0002 | 0.0009 MEX3C mex-3 RNA binding family member C                   | Multiple_Complex |
| TC2000008381.hg.1    | 6.02  | 5.39  | 1.55  | 0.0002 | 0.0009 JAG1 jagged 1                                             | Multiple_Complex |
| TC0400007095.hg.1    | 4.9   | 5.64  | -1.67 | 0.0002 | 0.0009 ZCCHC4 zinc finger, CCHC domain containing 4              | Multiple_Complex |
| TC1600011235.hg.1    | 9.21  | 8.2   | 2.02  | 0.0002 | 0.0009 GALNS galactosamine (N-acetyl)-6-sulfatase                | Multiple_Complex |
| TC0400012251.hg.1    | 6.94  | 6.43  | 1.42  | 0.0002 | 0.0009 C4orf46 chromosome 4 open reading frame 46                | Multiple_Complex |
| TC2000008345.hg.1    | 9.63  | 8.63  | 2     | 0.0002 | 0.0009 TMX4 thioredoxin-related transmembrane protein 4          | Multiple_Complex |
| TC1600009949.hg.1    | 5.07  | 4.35  | 1.66  | 0.0002 | 0.0009 FAM57B family with sequence similarity 57, member B       | Multiple_Complex |
| TC1400009124.hg.1    | 5.03  | 5.51  | -1.39 | 0.0002 | 0.0009 L2HGDH L-2-hydroxyglutarate dehydrogenase                 | Multiple_Complex |
| TC0X00009427.hg.1    | 7.07  | 7.95  | -1.84 | 0.0002 | 0.0009 BCOR BCL6 corepressor                                     | Multiple_Complex |
| TC2200008887.hg.1    | 6.2   | 5.21  | 1.98  | 0.0002 | 0.0009 ATP5L2 ATP synthase, H+ transporting, mitochondrial       | Coding           |
| TC1400008694.hg.1    | 8.37  | 8.98  | -1.52 | 0.0002 | 0.0009 ACIN1 apoptotic chromatin condensation inducer 1          | Multiple_Complex |
| TC1200010900.hg.1    | 12.36 | 12.96 | -1.51 | 0.0002 | 0.0009 SMARCC2 SWI/SNF related, matrix associated, actin dep     | Multiple_Complex |
| TC0600013033.hg.1    | 5.83  | 6.53  | -1.63 | 0.0002 | 0.0009 TBC1D32 TBC1 domain family, member 32                     | Multiple_Complex |
| TC1100013004.hg.1    | 6.09  | 6.95  | -1.82 | 0.0002 | 0.0009 CTNND1 catenin (cadherin-associated protein), delta 1     | Multiple_Complex |
| TC1200012657.hg.1    | 6.82  | 7.71  | -1.85 | 0.0002 | 0.0009 CAND1 cullin-associated and neddylation-dissociated       | Multiple_Complex |
| TC1500010941.hg.1    | 4.63  | 5.25  | -1.54 | 0.0002 | 0.0009 LYSMD4 LysM, putative peptidoglycan-binding, domair       | Coding           |
| TC1900009866.hg.1    | 7.58  | 6.95  | 1.55  | 0.0002 | 0.0009 AKAP8 A kinase (PKA) anchor protein 8                     | Multiple_Complex |
| TC0300013989.hg.1    | 6.79  | 7.45  | -1.58 | 0.0002 | 0.001 ABHD14B abhydrolase domain containing 14B                  | Multiple_Complex |
| TC1400007112.hg.1    | 6.16  | 6.95  | -1.74 | 0.0002 | 0.001 ATP5S ATP synthase, H+ transporting, mitochondrial         | Multiple_Complex |
| TC1100008985.hg.1    | 12.16 | 13.12 | -1.94 | 0.0002 | 0.001 ATM ATM serine/threonine kinase                            | Multiple_Complex |
| TC0800010002.hg.1    | 5.32  | 4.69  | 1.55  | 0.0002 | 0.001 DUSP4 dual specificity phosphatase 4                       | Multiple_Complex |
| TC1900009867.hg.1    | 10.13 | 9.15  | 1.97  | 0.0002 | 0.001 AKAP8L A kinase (PKA) anchor protein 8-like                | Multiple_Complex |
| TC0100018486.hg.1    | 13.48 | 14.13 | -1.57 | 0.0002 | 0.001 CDC42SE1 CDC42 small effector 1                            | Multiple_Complex |
| TSUnmapped00000523.h | 8.02  | 6.96  | 2.09  | 0.0002 | 0.001 RPS25 ribosomal protein S25                                | NonCoding        |
| TC0400009681.hg.1    | 6.37  | 7.37  | -1.99 | 0.0002 | 0.001 ZNF721; AE zinc finger protein 721; ATP binding cassette s | Multiple_Complex |
| TC1600010711.hg.1    | 7.79  | 8.62  | -1.78 | 0.0002 | 0.001 CHTF8 chromosome transmission fidelity factor 8            | Multiple_Complex |
| TC1100008002.hg.1    | 5.93  | 7.13  | -2.29 | 0.0002 | 0.001 MRPL49 mitochondrial ribosomal protein L49                 | Multiple_Complex |
| TC1400010593.hg.1    | 9.34  | 8.8   | 1.45  | 0.0002 | 0.001 FAM177A1 family with sequence similarity 177, member       | Multiple_Complex |
| TC0X00010346.hg.1    | 8.31  | 8.75  | -1.35 | 0.0002 | 0.001 TRMT2B tRNA methyltransferase 2 homolog B                  | Multiple_Complex |
| TC1100011735.hg.1    | 6.15  | 7.12  | -1.97 | 0.0002 | 0.001 INTS4 integrator complex subunit 4                         | Multiple_Complex |
| TC2200009262.hg.1    | 9.5   | 10.5  | -2    | 0.0002 | 0.001 EIF3L eukaryotic translation initiation factor 3, subu     | Multiple_Complex |
| TC0100016020.hg.1    | 8.93  | 9.63  | -1.63 | 0.0002 | 0.001 ISG20L2 interferon stimulated exonuclease gene 20kD;       | Multiple_Complex |

|                      |       |       |       |        |                  |                                                  |                  |
|----------------------|-------|-------|-------|--------|------------------|--------------------------------------------------|------------------|
| TC0100015660.hg.1    | 6.86  | 7.68  | -1.76 | 0.0002 | 0.001 PPIAL4G    | peptidylprolyl isomerase A (cyclophilin A)-like  | Coding           |
| TC0900008173.hg.1    | 11.38 | 12.35 | -1.95 | 0.0002 | 0.001 ANP32B     | acidic nuclear phosphoprotein 32 family mem      | Multiple_Complex |
| TC1500007009.hg.1    | 7.24  | 8.27  | -2.05 | 0.0002 | 0.001 MGA        | MGA, MAX dimerization protein                    | Multiple_Complex |
| TC1800008607.hg.1    | 5.71  | 5.14  | 1.49  | 0.0002 | 0.001 TCEB3CL2;  | transcription elongation factor B polypeptide    | Coding           |
| TC1700011561.hg.1    | 9     | 8.1   | 1.86  | 0.0002 | 0.001 WIP1       | WD repeat domain, phosphoinositide interact      | Multiple_Complex |
| TC0X00010434.hg.1    | 4.86  | 5.55  | -1.61 | 0.0002 | 0.001 SLC25A53   | solute carrier family 25, member 53              | Multiple_Complex |
| TC0200016544.hg.1    | 5.83  | 6.8   | -1.96 | 0.0002 | 0.001 RIF1       | replication timing regulatory factor 1           | NonCoding        |
| TC1000011605.hg.1    | 7.8   | 6.77  | 2.04  | 0.0002 | 0.001 CWF19L1;   | !CWF19-like 1, cell cycle control (S. pombe); sn | Multiple_Complex |
| TC0400012019.hg.1    | 4.85  | 6.6   | -3.37 | 0.0002 | 0.001 GYPA       | glycophorin A (MNS blood group)                  | Multiple_Complex |
| TC1000012430.hg.1    | 3.44  | 4.51  | -2.1  | 0.0002 | 0.001 RP11-295P  | novel transcript; Transcript Identified by AceV  | NonCoding        |
| TC0300010066.hg.1    | 9.97  | 9.08  | 1.86  | 0.0002 | 0.001 FYTDD1     | forty-two-three domain containing 1              | Multiple_Complex |
| TC0100016112.hg.1    | 15.24 | 13.98 | 2.4   | 0.0002 | 0.001 TAGLN2     | transgelin 2                                     | Multiple_Complex |
| TC1200009111.hg.1    | 5.36  | 6.19  | -1.78 | 0.0002 | 0.001 CCDC64     | coiled-coil domain containing 64                 | Multiple_Complex |
| TC1700010701.hg.1    | 7.36  | 6.68  | 1.6   | 0.0002 | 0.001 DNAJC7     | DnaJ (Hsp40) homolog, subfamily C, member        | NonCoding        |
| TC1900011871.hg.1    | 4.36  | 4.94  | -1.5  | 0.0002 | 0.001 ZNF653     | zinc finger protein 653                          | Multiple_Complex |
| TC2200006641.hg.1    | 6.29  | 7.13  | -1.79 | 0.0002 | 0.001 RANBP1     | RAN binding protein 1                            | Multiple_Complex |
| TC0X00007302.hg.1    | 4.86  | 5.31  | -1.36 | 0.0002 | 0.001 FAM156B;   | family with sequence similarity 156, member      | Multiple_Complex |
| TC1200012835.hg.1    | 7.39  | 6.17  | 2.33  | 0.0002 | 0.001 NT5DC3     | 5-nucleotidase domain containing 3               | Multiple_Complex |
| TC1600011371.hg.1    | 6.8   | 7.38  | -1.5  | 0.0002 | 0.001 SLX1A; SLX | SLX1 homolog A, structure-specific endonucle     | Multiple_Complex |
| TC2000008951.hg.1    | 5.34  | 5.97  | -1.55 | 0.0002 | 0.001 GSS        | glutathione synthetase                           | Multiple_Complex |
| TC0900010762.hg.1    | 8.21  | 8.85  | -1.55 | 0.0002 | 0.001 AUH        | AU RNA binding protein/enoyl-CoA hydratase       | Multiple_Complex |
| TC0300011151.hg.1    | 10.38 | 9.31  | 2.1   | 0.0002 | 0.001 RPL29      | ribosomal protein L29                            | Multiple_Complex |
| TC0700010398.hg.1    | 6.05  | 5.48  | 1.48  | 0.0002 | 0.001 TMEM196    | transmembrane protein 196                        | Coding           |
| TC0X00009384.hg.1    | 6.32  | 5.58  | 1.67  | 0.0002 | 0.001 DYNLT3     | dynein, light chain, Tctex-type 3                | Coding           |
| TC0500011121.hg.1    | 3.93  | 3.39  | 1.45  | 0.0002 | 0.001 FOXD1      | forkhead box D1                                  | Multiple_Complex |
| TC0100009449.hg.1    | 6.42  | 7.92  | -2.83 | 0.0002 | 0.001 MOV10      | Mov10 RISC complex RNA helicase                  | Multiple_Complex |
| TC1100008054.hg.1    | 8.16  | 8.94  | -1.71 | 0.0002 | 0.001 PACS1      | phosphofurin acidic cluster sorting protein 1    | Multiple_Complex |
| TC1700009900.hg.1    | 3.81  | 4.93  | -2.18 | 0.0002 | 0.001 ZNF287     | zinc finger protein 287                          | Multiple_Complex |
| TC0600008447.hg.1    | 4.58  | 3.98  | 1.52  | 0.0002 | 0.001 ADGRB3     | adhesion G protein-coupled receptor B3           | Multiple_Complex |
| TC0600008064.hg.1    | 7.53  | 8.59  | -2.08 | 0.0002 | 0.001 PPP2R5D    | protein phosphatase 2, regulatory subunit B, c   | Multiple_Complex |
| TC2100007883.hg.1    | 4     | 3.52  | 1.39  | 0.0002 | 0.001 KRTAP24-1  | keratin associated protein 24-1                  | Coding           |
| TC1200006737.hg.1    | 7.7   | 8.35  | -1.57 | 0.0002 | 0.001 PHC1       | polyhomeotic homolog 1 (Drosophila)              | Multiple_Complex |
| TC1600009646.hg.1    | 4.96  | 5.82  | -1.81 | 0.0002 | 0.001 KNOP1      | lysine-rich nucleolar protein 1                  | Multiple_Complex |
| TC0200016682.hg.1    | 13.23 | 11.92 | 2.48  | 0.0002 | 0.001 PPP3R1     | protein phosphatase 3, regulatory subunit B, ε   | Coding           |
| TC0X00007199.hg.1    | 10.64 | 11.96 | -2.5  | 0.0002 | 0.001 WAS        | Wiskott-Aldrich syndrome                         | Multiple_Complex |
| TC0700008090.hg.1    | 10.46 | 11.88 | -2.67 | 0.0002 | 0.001 HSPB1      | heat shock 27kDa protein 1                       | Multiple_Complex |
| TC0300010082.hg.1    | 10.28 | 9.04  | 2.36  | 0.0002 | 0.001 FAM157A    | family with sequence similarity 157, member      | Multiple_Complex |
| TC0400006487.hg.1    | 8.7   | 9.3   | -1.52 | 0.0002 | 0.001 TMEM175    | transmembrane protein 175                        | Multiple_Complex |
| TC0900009569.hg.1    | 5.77  | 4.52  | 2.38  | 0.0002 | 0.001 NFIB       | nuclear factor I/B                               | Multiple_Complex |
| TC0700008565.hg.1    | 8.37  | 7.27  | 2.15  | 0.0002 | 0.001 SLC12A9    | solute carrier family 12, member 9               | Multiple_Complex |
| TC2000007277.hg.1    | 12.08 | 12.63 | -1.46 | 0.0002 | 0.001 RPN2       | ribophorin II                                    | Multiple_Complex |
| TC2000008217.hg.1    | 5.37  | 4.85  | 1.43  | 0.0002 | 0.001 SLC4A11    | solute carrier family 4, sodium borate transpo   | Multiple_Complex |
| TC0800012213.hg.1    | 7.25  | 8.47  | -2.33 | 0.0002 | 0.001 VPS28      | vacuolar protein sorting 28 homolog (S. cerevi   | Multiple_Complex |
| TC1000007596.hg.1    | 8.82  | 9.4   | -1.5  | 0.0002 | 0.001 TIMM23B    | translocase of inner mitochondrial membrane      | Multiple_Complex |
| TSUnmapped00000243.h | 10.79 | 9.21  | 3     | 0.0002 | 0.001 MANSC1     | MANSC domain containing 1                        | Coding           |
| TC1500010906.hg.1    | 5.87  | 6.65  | -1.72 | 0.0002 | 0.001 RP11-351N  | Transcript Identified by AceView, Entrez Gene    | Multiple_Complex |
| TC1700007942.hg.1    | 8.74  | 9.29  | -1.47 | 0.0002 | 0.001 NBR1       | neighbor of BRCA1 gene 1                         | Multiple_Complex |
| TC1200011671.hg.1    | 11.21 | 10.39 | 1.77  | 0.0002 | 0.001 UHRF1BP1I  | UHRF1 binding protein 1-like                     | Multiple_Complex |
| TC1700010707.hg.1    | 7.13  | 8.56  | -2.7  | 0.0002 | 0.001 DHX58      | DEXH (Asp-Glu-X-His) box polypeptide 58          | Multiple_Complex |
| TC1100010897.hg.1    | 12.61 | 14.72 | -4.32 | 0.0002 | 0.0011 UBE2L6    | ubiquitin-conjugating enzyme E2L 6               | Multiple_Complex |
| TC0400012375.hg.1    | 6.73  | 7.66  | -1.91 | 0.0002 | 0.0011 CBR4      | carbonyl reductase 4                             | Multiple_Complex |
| TC1100009940.hg.1    | 5.25  | 6.64  | -2.62 | 0.0002 | 0.0011 TRIM5     | tripartite motif containing 5                    | Multiple_Complex |
| TC0700010941.hg.1    | 10.12 | 10.85 | -1.65 | 0.0002 | 0.0011 MYO1G     | myosin IG                                        | Multiple_Complex |
| TC0100009959.hg.1    | 5.85  | 5.15  | 1.62  | 0.0002 | 0.0011 TUFT1     | tuftelin 1                                       | Multiple_Complex |
| TC0500013309.hg.1    | 6.61  | 6.13  | 1.4   | 0.0002 | 0.0011 ESM1      | endothelial cell-specific molecule 1             | Coding           |
| TC0600012631.hg.1    | 7.27  | 8.05  | -1.72 | 0.0002 | 0.0011 MMS22L    | MMS22-like, DNA repair protein                   | Multiple_Complex |
| TC0200015332.hg.1    | 5.76  | 6.95  | -2.28 | 0.0002 | 0.0011 PGAP1     | post-GPI attachment to proteins 1                | Multiple_Complex |
| TC0700009067.hg.1    | 9.95  | 11.08 | -2.19 | 0.0002 | 0.0011 ATP6V1F   | ATPase, H+ transporting, lysosomal 14kDa, V1     | Multiple_Complex |
| TC0200009895.hg.1    | 8.82  | 9.64  | -1.77 | 0.0002 | 0.0011 CERS6     | ceramide synthase 6                              | Multiple_Complex |
| TC0600014263.hg.1    | 6.32  | 5.8   | 1.43  | 0.0002 | 0.0011 LY6G6E    | lymphocyte antigen 6 complex, locus G6E (psc     | Multiple_Complex |
| TC2000007300.hg.1    | 7.99  | 8.72  | -1.66 | 0.0002 | 0.0011 RPRD1B    | regulation of nuclear pre-mRNA domain conta      | Multiple_Complex |
| TC0900007992.hg.1    | 11.25 | 11.99 | -1.67 | 0.0002 | 0.0011 FAM120A   | family with sequence similarity 120A             | Multiple_Complex |
| TC2200008799.hg.1    | 8.78  | 9.83  | -2.06 | 0.0002 | 0.0011 ST13      | suppression of tumorigenicity 13 (colon carcir   | Multiple_Complex |
| TC1200007820.hg.1    | 11.33 | 12.43 | -2.13 | 0.0002 | 0.0011 RAB5B     | RAB5B, member RAS oncogene family                | Multiple_Complex |
| TC2200009218.hg.1    | 5.46  | 6.19  | -1.65 | 0.0002 | 0.0011 MIR650;   | IG microRNA 650; immunoglobulin lambda varia     | Multiple_Complex |
| TC1300007731.hg.1    | 4.12  | 5.05  | -1.9  | 0.0002 | 0.0011 GPR180    | G protein-coupled receptor 180                   | Multiple_Complex |
| TC0300011016.hg.1    | 3.88  | 4.69  | -1.75 | 0.0002 | 0.0011 NME6      | NME/NM23 nucleoside diphosphate kinase 6         | Multiple_Complex |
| TC0600012747.hg.1    | 9.83  | 8.01  | 3.53  | 0.0002 | 0.0011 CD24      | CD24 molecule                                    | Multiple_Complex |
| TC1100009245.hg.1    | 9.14  | 10.19 | -2.07 | 0.0002 | 0.0011 CBL       | Cbl proto-oncogene, E3 ubiquitin protein ligas   | Multiple_Complex |
| TC0600014177.hg.1    | 9.01  | 8.03  | 1.97  | 0.0002 | 0.0011 DSE       | dermatan sulfate epimerase                       | Multiple_Complex |



|                   |       |       |       |        |                  |                                                                             |
|-------------------|-------|-------|-------|--------|------------------|-----------------------------------------------------------------------------|
| TC1200007108.hg.1 | 6.18  | 5.3   | 1.84  | 0.0002 | 0.0011 KRAS      | Memczak2013 ANTISENSE, coding, INTERNAL, NonCoding                          |
| TC1200010655.hg.1 | 5.78  | 6.49  | -1.64 | 0.0002 | 0.0011 LIMA1     | LIM domain and actin binding 1 Multiple_Complex                             |
| TC2000009945.hg.1 | 5.4   | 4.73  | 1.58  | 0.0002 | 0.0011 FAM209A   | family with sequence similarity 209, member Coding                          |
| TC0100006983.hg.1 | 4.42  | 3.94  | 1.39  | 0.0002 | 0.0011 CTRC      | chymotrypsin C (caldecrin) Multiple_Complex                                 |
| TC1900006522.hg.1 | 12.69 | 11.38 | 2.49  | 0.0002 | 0.0011 MIDN      | midnolin Multiple_Complex                                                   |
| TC0400012487.hg.1 | 5.64  | 4.9   | 1.67  | 0.0002 | 0.0011 VEGFC     | vascular endothelial growth factor C Multiple_Complex                       |
| TC0300009610.hg.1 | 8.2   | 9.19  | -2    | 0.0002 | 0.0011 NDUFB5    | NADH dehydrogenase (ubiquinone) 1 beta subunit Multiple_Complex             |
| TC0600008674.hg.1 | 5.89  | 5.04  | 1.8   | 0.0002 | 0.0011 RIPPLY2   | rippy transcriptional repressor 2 Multiple_Complex                          |
| TC1900012019.hg.1 | 7.12  | 7.99  | -1.83 | 0.0002 | 0.0011 ZNF649    | zinc finger protein 649 Multiple_Complex                                    |
| TC0X00007195.hg.1 | 10.88 | 9.85  | 2.04  | 0.0002 | 0.0011 RBM3      | RNA binding motif (RNP1, RRM) protein 3 Multiple_Complex                    |
| TC1100012981.hg.1 | 6.44  | 7.49  | -2.06 | 0.0002 | 0.0011 RCN1      | reticulocalbin 1, EF-hand calcium binding domain Multiple_Complex           |
| TC0200016568.hg.1 | 7.48  | 6.85  | 1.55  | 0.0002 | 0.0011 HOXD3     | homeobox D3 NonCoding                                                       |
| TC0200016595.hg.1 | 13.39 | 14.73 | -2.52 | 0.0002 | 0.0011 RPL37A    | ribosomal protein L37a Multiple_Complex                                     |
| TC1600007186.hg.1 | 6.88  | 7.53  | -1.57 | 0.0002 | 0.0011 C16orf52  | chromosome 16 open reading frame 52 Multiple_Complex                        |
| TC0600008571.hg.1 | 4.14  | 4.87  | -1.66 | 0.0002 | 0.0011 MYO6      | Transcript Identified by AceView, Entrez Gene Unassigned                    |
| TC1200010931.hg.1 | 11.67 | 12.49 | -1.76 | 0.0002 | 0.0011 PTGES3    | prostaglandin E synthase 3 (cytosolic) Multiple_Complex                     |
| TC1600006886.hg.1 | 6.56  | 7.38  | -1.76 | 0.0002 | 0.0011 NUBP1     | nucleotide binding protein 1 Multiple_Complex                               |
| TC1900011957.hg.1 | 8.14  | 9.13  | -1.99 | 0.0002 | 0.0011 GSK3A     | glycogen synthase kinase 3 alpha Multiple_Complex                           |
| TC1900009304.hg.1 | 4.85  | 4.05  | 1.73  | 0.0002 | 0.0011 PIP5K1C   | Zhang2013 ALT_ACCEPTOR, ALT_DONOR, codon NonCoding                          |
| TC1200007050.hg.1 | 4.9   | 4.1   | 1.74  | 0.0002 | 0.0011 IAPP      | islet amyloid polypeptide Coding                                            |
| TC1200012745.hg.1 | 9.44  | 8.48  | 1.94  | 0.0002 | 0.0011 C1RL      | complement component 1, r subcomponent-like Multiple_Complex                |
| TC1600008878.hg.1 | 4.36  | 3.72  | 1.56  | 0.0002 | 0.0011 LOC100287 | uncharacterized LOC100287036; novel transcript Multiple_Complex             |
| TC1300008837.hg.1 | 9.49  | 10.51 | -2.04 | 0.0002 | 0.0011 ZC3H13    | zinc finger CCH-type containing 13 Multiple_Complex                         |
| TC1300007843.hg.1 | 12.83 | 13.5  | -1.59 | 0.0002 | 0.0011 TM9SF2    | transmembrane 9 superfamily member 2 Multiple_Complex                       |
| TC1900008415.hg.1 | 7.31  | 6.42  | 1.86  | 0.0002 | 0.0011 CCDC9     | coiled-coil domain containing 9 Multiple_Complex                            |
| TC0800006603.hg.1 | 5.21  | 4.35  | 1.81  | 0.0002 | 0.0011 DEFB105B  | defensin, beta 105B; defensin, beta 105A Coding                             |
| TC1900009302.hg.1 | 7.61  | 8.32  | -1.63 | 0.0002 | 0.0011 PIP5K1C   | phosphatidylinositol-4-phosphate 5-kinase, type Multiple_Complex            |
| TC0300014042.hg.1 | 8.99  | 8.17  | 1.77  | 0.0002 | 0.0011 RAB43     | RAB43, member RAS oncogene family Coding                                    |
| TC1800008862.hg.1 | 6.2   | 7.09  | -1.85 | 0.0002 | 0.0011 PIGN      | phosphatidylinositol glycan anchor biosynthesis Multiple_Complex            |
| TC2200008055.hg.1 | 7.95  | 9.28  | -2.51 | 0.0002 | 0.0011 PI4KA     | phosphatidylinositol 4-kinase, catalytic, alpha Multiple_Complex            |
| TC0700009253.hg.1 | 4.91  | 6.21  | -2.47 | 0.0002 | 0.0011 NUP205    | nucleoporin 205kDa Multiple_Complex                                         |
| TC0X00009667.hg.1 | 5.15  | 6.4   | -2.39 | 0.0002 | 0.0011 FOXP3     | forkhead box P3 Coding                                                      |
| TC1900009893.hg.1 | 9.52  | 8.15  | 2.59  | 0.0002 | 0.0011 CYP4F2    | cytochrome P450, family 4, subfamily F, polyploid Multiple_Complex          |
| TC0300009500.hg.1 | 14.59 | 15.49 | -1.86 | 0.0002 | 0.0012 FNDC3B    | fibronectin type III domain containing 3B Multiple_Complex                  |
| TC0X00007026.hg.1 | 12.6  | 11.78 | 1.78  | 0.0002 | 0.0012 USP9X     | ubiquitin specific peptidase 9, X-linked Multiple_Complex                   |
| TC1200007626.hg.1 | 10.88 | 12.12 | -2.36 | 0.0002 | 0.0012 METTL7A   | methyltransferase like 7A Coding                                            |
| TC0X00009767.hg.1 | 7.82  | 8.79  | -1.96 | 0.0002 | 0.0012 HUWE1     | HECT, UBA and WWE domain containing 1, E3 ubiquitin Multiple_Complex        |
| TC1100012886.hg.1 | 5.78  | 5.25  | 1.44  | 0.0002 | 0.0012 OPCML     | opioid binding protein/cell adhesion molecule NonCoding                     |
| TC1900011234.hg.1 | 4.9   | 4.28  | 1.54  | 0.0002 | 0.0012 KLK11     | kallikrein related peptidase 11 Multiple_Complex                            |
| TC1900008249.hg.1 | 5.62  | 6.47  | -1.81 | 0.0002 | 0.0012 ZNF230    | zinc finger protein 230 Multiple_Complex                                    |
| TC0800008122.hg.1 | 6.52  | 7.24  | -1.65 | 0.0002 | 0.0012 E2F5      | E2F transcription factor 5, p130-binding Multiple_Complex                   |
| TC0200010216.hg.1 | 5.68  | 6.33  | -1.57 | 0.0002 | 0.0012 ITGAV     | integrin alpha V Multiple_Complex                                           |
| TC0900011665.hg.1 | 4.87  | 5.32  | -1.36 | 0.0002 | 0.0012 DOLK      | dolichol kinase Coding                                                      |
| TC0200008291.hg.1 | 8.52  | 7.63  | 1.86  | 0.0002 | 0.0012 KDM3A     | lysine (K)-specific demethylase 3A Multiple_Complex                         |
| TC1300010036.hg.1 | 4.3   | 3.68  | 1.54  | 0.0002 | 0.0012 LINC00598 | long intergenic non-protein coding RNA 598 NonCoding                        |
| TC1000008363.hg.1 | 17.35 | 16.02 | 2.5   | 0.0002 | 0.0012 PTEN      | phosphatase and tensin homolog Multiple_Complex                             |
| TC0100013748.hg.1 | 6.85  | 5.68  | 2.26  | 0.0002 | 0.0012 GNL2      | guanine nucleotide binding protein-like 2 (nucleotide Multiple_Complex      |
| TC2100007341.hg.1 | 4.9   | 5.73  | -1.79 | 0.0002 | 0.0012 PWP2      | PWP2 periodic tryptophan protein homolog (yeast Multiple_Complex            |
| TC0200012339.hg.1 | 8.39  | 7.32  | 2.11  | 0.0002 | 0.0012 SLC8A1    | solute carrier family 8 (sodium/calcium exchanger) Multiple_Complex         |
| TC0200011022.hg.1 | 8.28  | 9.07  | -1.73 | 0.0002 | 0.0012 SP140L    | SP140 nuclear body protein-like Multiple_Complex                            |
| TC1900008745.hg.1 | 5.7   | 6.34  | -1.56 | 0.0002 | 0.0012 ZNF525    | zinc finger protein 525 Multiple_Complex                                    |
| TC0600007684.hg.1 | 6.76  | 6.07  | 1.61  | 0.0002 | 0.0012 SLC39A7   | solute carrier family 39 (zinc transporter), member Multiple_Complex        |
| TC0100007344.hg.1 | 11.14 | 10.18 | 1.94  | 0.0002 | 0.0012 PNRC2     | proline-rich nuclear receptor coactivator 2 Multiple_Complex                |
| TC2000007486.hg.1 | 7.24  | 6.75  | 1.41  | 0.0002 | 0.0012 RBPJL     | recombination signal binding protein for immunoglobulin Multiple_Complex    |
| TC1200007789.hg.1 | 4.12  | 3.39  | 1.67  | 0.0002 | 0.0012 OR6C75    | olfactory receptor, family 6, subfamily C, member Coding                    |
| TC0200012995.hg.1 | 4.59  | 5.18  | -1.5  | 0.0002 | 0.0012 FAM136A   | family with sequence similarity 136, member Multiple_Complex                |
| TC1000011469.hg.1 | 4.51  | 5.51  | -1.99 | 0.0002 | 0.0012 NOC3L     | NOC3-like DNA replication regulator Multiple_Complex                        |
| TC1200010105.hg.1 | 7.51  | 8.48  | -1.97 | 0.0002 | 0.0012 RECQL     | RecQ helicase-like Multiple_Complex                                         |
| TC1300008487.hg.1 | 6.22  | 7.1   | -1.83 | 0.0002 | 0.0012 SLC7A1    | solute carrier family 7 (cationic amino acid transporter) Multiple_Complex  |
| TC2200008226.hg.1 | 9.87  | 10.84 | -1.96 | 0.0002 | 0.0012 GUCD1     | guanylyl cyclase domain containing 1 Multiple_Complex                       |
| TC0100008025.hg.1 | 13.74 | 14.76 | -2.02 | 0.0002 | 0.0012 YBX1      | Y box binding protein 1 Multiple_Complex                                    |
| TC1700008263.hg.1 | 5.82  | 4.66  | 2.24  | 0.0002 | 0.0012 ABCC3     | ATP binding cassette subfamily C member 3 Multiple_Complex                  |
| TC0700012731.hg.1 | 4.25  | 3.87  | 1.29  | 0.0002 | 0.0012 DGKI      | diacylglycerol kinase, iota Multiple_Complex                                |
| TC1100012495.hg.1 | 13.03 | 12.4  | 1.54  | 0.0002 | 0.0012 DDX6      | DEAD (Asp-Glu-Ala-Asp) box helicase 6 Multiple_Complex                      |
| TC1900008287.hg.1 | 6.65  | 4.84  | 3.5   | 0.0002 | 0.0012 PVRL2     | poliovirus receptor-related 2 (herpesvirus entry receptor) Multiple_Complex |
| TC1600008193.hg.1 | 6.73  | 7.44  | -1.63 | 0.0002 | 0.0012 PRMT7     | protein arginine methyltransferase 7 Multiple_Complex                       |
| TC0900011146.hg.1 | 5.67  | 6.79  | -2.17 | 0.0002 | 0.0012 IKBKAP    | inhibitor of kappa light polypeptide gene enhancer Multiple_Complex         |
| TC0700010728.hg.1 | 13.46 | 14.14 | -1.61 | 0.0002 | 0.0012 HERPUD2   | HERPUD family member 2 Multiple_Complex                                     |
| TC1700007425.hg.1 | 3.83  | 4.53  | -1.62 | 0.0002 | 0.0012 TP53I13   | tumor protein p53 inducible protein 13 Multiple_Complex                     |
| TC0900008836.hg.1 | 5.73  | 6.74  | -2    | 0.0002 | 0.0012 FAM102A   | Memczak2013 ANTISENSE, CDS, coding, INTF NonCoding                          |

|                      |       |       |       |        |                  |                                                  |                  |
|----------------------|-------|-------|-------|--------|------------------|--------------------------------------------------|------------------|
| TC0300011036.hg.1    | 7.48  | 6.69  | 1.73  | 0.0002 | 0.0012 PRKAR2A   | protein kinase, cAMP-dependent, regulatory, i    | Multiple_Complex |
| TC1700007772.hg.1    | 7.76  | 8.55  | -1.73 | 0.0002 | 0.0012 PSMD3     | proteasome 26S subunit, non-ATPase 3             | Multiple_Complex |
| TC0400012057.hg.1    | 6.69  | 7.55  | -1.82 | 0.0002 | 0.0012 SLC10A7   | solute carrier family 10, member 7               | Multiple_Complex |
| TC1700012256.hg.1    | 5.28  | 4.65  | 1.55  | 0.0003 | 0.0013 KRTAP9-9  | keratin associated protein 9-9                   | Coding           |
| TC2200008434.hg.1    | 10.75 | 11.67 | -1.89 | 0.0003 | 0.0013 SF3A1     | splicing factor 3a, subunit 1, 120kDa            | Multiple_Complex |
| TC0300007004.hg.1    | 11.28 | 11.87 | -1.5  | 0.0003 | 0.0013 PDCD6IP   | programmed cell death 6 interacting protein      | Multiple_Complex |
| TC0100013796.hg.1    | 6.89  | 7.78  | -1.85 | 0.0003 | 0.0013 PABPC4    | poly(A) binding protein, cytoplasmic 4 (inducib  | Multiple_Complex |
| TC0700009256.hg.1    | 9.81  | 10.76 | -1.93 | 0.0003 | 0.0013 C7orf73   | chromosome 7 open reading frame 73               | Multiple_Complex |
| TC0200015087.hg.1    | 7.07  | 6.34  | 1.66  | 0.0003 | 0.0013 SESTD1    | SEC14 and spectrin domains 1                     | Multiple_Complex |
| TC0100018045.hg.1    | 5.86  | 6.64  | -1.71 | 0.0003 | 0.0013 SMYD3     | SET and MYND domain containing 3                 | Multiple_Complex |
| TC0600014322.hg.1    | 9.46  | 10.45 | -1.99 | 0.0003 | 0.0013 SYNRIP    | synaptotagmin binding, cytoplasmic RNA inter     | Multiple_Complex |
| TC0100011988.hg.1    | 9.81  | 10.97 | -2.23 | 0.0003 | 0.0013 EIF3A     | eukaryotic translation initiation factor 3, subu | Multiple_Complex |
| TC0500013174.hg.1    | 11.7  | 11.1  | 1.51  | 0.0003 | 0.0013 KIF2A     | kinesin heavy chain member 2A                    | Multiple_Complex |
| TC0700013371.hg.1    | 7.07  | 7.91  | -1.8  | 0.0003 | 0.0013 ZNF138    | zinc finger protein 138                          | Multiple_Complex |
| TC1900010761.hg.1    | 9.28  | 7.92  | 2.57  | 0.0003 | 0.0013 CEACAM4   | carcinoembryonic antigen-related cell adhesio    | Multiple_Complex |
| TC1600009182.hg.1    | 5.28  | 6.17  | -1.86 | 0.0003 | 0.0013 ZNF200    | zinc finger protein 200                          | Multiple_Complex |
| TC1300009725.hg.1    | 6.44  | 5.77  | 1.59  | 0.0003 | 0.0013 FAM155A   | family with sequence similarity 155, member .    | Coding           |
| TC0200016509.hg.1    | 5.03  | 4.44  | 1.5   | 0.0003 | 0.0013 NT5DC4    | 5-nucleotidase domain containing 4               | NonCoding        |
| TC0600013186.hg.1    | 5.06  | 5.7   | -1.56 | 0.0003 | 0.0013 CTGF      | connective tissue growth factor                  | Multiple_Complex |
| TC1900007313.hg.1    | 8.39  | 8.99  | -1.52 | 0.0003 | 0.0013 USE1      | unconventional SNARE in the ER 1 homolog (S      | Multiple_Complex |
| TC0400008329.hg.1    | 5.88  | 6.69  | -1.76 | 0.0003 | 0.0013 GSTCD     | glutathione S-transferase, C-terminal domain     | Multiple_Complex |
| TC0900008628.hg.1    | 7.28  | 8.2   | -1.89 | 0.0003 | 0.0013 CNTRL     | centriolin                                       | Multiple_Complex |
| TC0300013978.hg.1    | 10.4  | 9.68  | 1.65  | 0.0003 | 0.0013 USP4      | ubiquitin specific peptidase 4 (proto-oncogen    | Multiple_Complex |
| TC0300012189.hg.1    | 9.2   | 8.2   | 2     | 0.0003 | 0.0013 KPNA1     | karyopherin alpha 1                              | Multiple_Complex |
| TC2100007663.hg.1    | 6.97  | 6.07  | 1.86  | 0.0003 | 0.0013 BTG3      | BTG family, member 3                             | Multiple_Complex |
| TC1200006957.hg.1    | 6.18  | 7.14  | -1.94 | 0.0003 | 0.0013 PTPRO     | protein tyrosine phosphatase, receptor type, (   | Multiple_Complex |
| TC0300008989.hg.1    | 7.38  | 6.54  | 1.79  | 0.0003 | 0.0013 SLC25A36  | solute carrier family 25 (pyrimidine nucleotid   | Multiple_Complex |
| TC0400010077.hg.1    | 6.4   | 7.01  | -1.53 | 0.0003 | 0.0013 RAB28     | RAB28, member RAS oncogene family                | Multiple_Complex |
| TC1100010818.hg.1    | 4.55  | 4.07  | 1.39  | 0.0003 | 0.0013 OR4C46    | olfactory receptor, family 4, subfamily C, merr  | Coding           |
| TC0200006977.hg.1    | 4.35  | 5.05  | -1.62 | 0.0003 | 0.0014 CENPO     | centromere protein O                             | Multiple_Complex |
| TC0300011175.hg.1    | 8.02  | 8.55  | -1.45 | 0.0003 | 0.0014 PBRM1     | polybromo 1                                      | Multiple_Complex |
| TC0900011510.hg.1    | 12.17 | 9.58  | 6.01  | 0.0003 | 0.0014 RPL35     | ribosomal protein L35                            | Multiple_Complex |
| TC0200011257.hg.1    | 5.22  | 5.66  | -1.36 | 0.0003 | 0.0014 PRLH      | prolactin releasing hormone                      | Coding           |
| TSUnmapped00000125.h | 9.16  | 8.55  | 1.52  | 0.0003 | 0.0014 KIAA1143  | KIAA1143 [Source:HGNC Symbol;Acc:HGNC:25         | NonCoding        |
| TC0300007033.hg.1    | 7.07  | 7.62  | -1.47 | 0.0003 | 0.0014 MLH1      | mutL homolog 1                                   | Multiple_Complex |
| TC1100010948.hg.1    | 5.04  | 4.57  | 1.39  | 0.0003 | 0.0014 GLYAT     | glycine-N-acyltransferase                        | Multiple_Complex |
| TC1200012629.hg.1    | 17.94 | 18.63 | -1.62 | 0.0003 | 0.0014 DAZAP2    | DAZ associated protein 2                         | Multiple_Complex |
| TC0500007452.hg.1    | 11.47 | 12.28 | -1.75 | 0.0003 | 0.0014 MAP3K1    | mitogen-activated protein kinase kinase kinase   | Multiple_Complex |
| TC1400009422.hg.1    | 5.14  | 5.98  | -1.78 | 0.0003 | 0.0014 RAB15     | RAB15, member RAS oncogene family                | Multiple_Complex |
| TC2000008894.hg.1    | 4.33  | 3.77  | 1.48  | 0.0003 | 0.0014 E2F1      | E2F transcription factor 1                       | Multiple_Complex |
| TC1900007848.hg.1    | 4.9   | 4.18  | 1.64  | 0.0003 | 0.0014 HAMP      | hepcidin antimicrobial peptide                   | Multiple_Complex |
| TC2000006571.hg.1    | 9.1   | 7.68  | 2.68  | 0.0003 | 0.0014 SMOX      | spermine oxidase                                 | Multiple_Complex |
| TC2200007547.hg.1    | 7.62  | 6.71  | 1.88  | 0.0003 | 0.0014 TSP0      | translocator protein (18kDa)                     | Multiple_Complex |
| TC0200015401.hg.1    | 7.73  | 8.41  | -1.6  | 0.0003 | 0.0014 ORC2      | origin recognition complex subunit 2             | Multiple_Complex |
| TC0700011156.hg.1    | 4.69  | 3.99  | 1.63  | 0.0003 | 0.0014 14-Sep    | septin 14                                        | Multiple_Complex |
| TC1100008523.hg.1    | 5.18  | 5.7   | -1.43 | 0.0003 | 0.0014 CAPN5     | calpain 5                                        | Multiple_Complex |
| TC1100009287.hg.1    | 8.75  | 7.58  | 2.25  | 0.0003 | 0.0014 ARHGEF12  | Rho guanine nucleotide exchange factor (GEF)     | Multiple_Complex |
| TC1500010706.hg.1    | 5.45  | 4.67  | 1.72  | 0.0003 | 0.0014 ARHGAP11  | Rho GTPase activating protein 11B                | NonCoding        |
| TC0100009402.hg.1    | 8.47  | 9.35  | -1.83 | 0.0003 | 0.0014 CEPT1     | choline/ethanolamine phosphotransferase 1        | Multiple_Complex |
| TC1700010831.hg.1    | 9.35  | 10.36 | -2.01 | 0.0003 | 0.0014 GPATCH8   | G-patch domain containing 8                      | Multiple_Complex |
| TC1900009757.hg.1    | 8.59  | 9.41  | -1.76 | 0.0003 | 0.0014 FARSA     | phenylalanyl-tRNA synthetase alpha subunit       | Multiple_Complex |
| TC0900011970.hg.1    | 4.75  | 5.51  | -1.69 | 0.0003 | 0.0014 QSOX2     | quiescinq Q6 sulfhydryl oxidase 2                | Multiple_Complex |
| TC1400006537.hg.1    | 8.65  | 7.65  | 2.01  | 0.0003 | 0.0014 RNASE3    | ribonuclease, RNase A family, 3                  | Coding           |
| TC1700008602.hg.1    | 7.55  | 6.46  | 2.14  | 0.0003 | 0.0014 DDX5      | Memczak2013 ANTISENSE, CDS, coding, INTEF        | NonCoding        |
| TC1200009931.hg.1    | 4.33  | 5.4   | -2.11 | 0.0003 | 0.0014 TAS2R46   | taste receptor, type 2, member 46                | Coding           |
| TC0X00011274.hg.1    | 6.03  | 6.77  | -1.67 | 0.0003 | 0.0014 TCEANC    | transcription elongation factor A (SII) N-termir | Multiple_Complex |
| TC1900012024.hg.1    | 5     | 5.68  | -1.61 | 0.0003 | 0.0014 ZNF600    | zinc finger protein 600                          | Multiple_Complex |
| TC0500011146.hg.1    | 5.76  | 4.85  | 1.89  | 0.0003 | 0.0014 ENC1      | ectodermal-neural cortex 1 (with BTB domain)     | Multiple_Complex |
| TC1200008606.hg.1    | 6.12  | 6.87  | -1.69 | 0.0003 | 0.0014 UTP20     | UTP20 small subunit (SSU) processome compr       | Multiple_Complex |
| TC0900012066.hg.1    | 5.22  | 6.18  | -1.95 | 0.0003 | 0.0014 NSMF; MIR | NMDA receptor synaptonuclear signaling and       | Multiple_Complex |
| TC0900006438.hg.1    | 13.38 | 14.1  | -1.65 | 0.0003 | 0.0014 DOCK8     | dedicator of cytokinesis 8                       | Multiple_Complex |
| TC1200010976.hg.1    | 8.04  | 8.82  | -1.71 | 0.0003 | 0.0014 AGAP2     | ArfGAP with GTPase domain, ankyrin repeat a      | Multiple_Complex |
| TC0500007303.hg.1    | 7.84  | 8.55  | -1.63 | 0.0003 | 0.0014 NNT       | nicotinamide nucleotide transhydrogenase         | Multiple_Complex |
| TC1100013002.hg.1    | 5.9   | 6.61  | -1.63 | 0.0003 | 0.0014 TMX2-CTNI | TMX2-CTNND1 readthrough (NMD candidate)          | Multiple_Complex |
| TC1600010276.hg.1    | 6.89  | 7.92  | -2.05 | 0.0003 | 0.0014 SNX20     | sorting nexin 20                                 | Multiple_Complex |
| TC0600008057.hg.1    | 4.9   | 4.28  | 1.54  | 0.0003 | 0.0014 PTCRA     | pre T-cell antigen receptor alpha                | Coding           |
| TC1300008137.hg.1    | 8.4   | 7.07  | 2.51  | 0.0003 | 0.0014 TMCO3     | transmembrane and coiled-coil domains 3          | Multiple_Complex |
| TC0700010887.hg.1    | 9.75  | 10.39 | -1.55 | 0.0003 | 0.0014 COA1      | cytochrome c oxidase assembly factor 1 homc      | Multiple_Complex |
| TC0300011059.hg.1    | 10.84 | 9.48  | 2.57  | 0.0003 | 0.0014 GPX1      | glutathione peroxidase 1                         | Multiple_Complex |
| TC0100014505.hg.1    | 7.08  | 7.93  | -1.81 | 0.0003 | 0.0014 SLC35D1   | solute carrier family 35 (UDP-GlcA/UDP-Galn      | Multiple_Complex |

|                   |       |       |       |        |                   |                                                          |                  |
|-------------------|-------|-------|-------|--------|-------------------|----------------------------------------------------------|------------------|
| TC1900011880.hg.1 | 8.24  | 7.56  | 1.6   | 0.0003 | 0.0014 ZNF44      | zinc finger protein 44                                   | Multiple_Complex |
| TC0400006930.hg.1 | 8.95  | 7.9   | 2.08  | 0.0003 | 0.0015 CPEB2      | cytoplasmic polyadenylation element binding              | Multiple_Complex |
| TC1100009248.hg.1 | 4.87  | 5.56  | -1.61 | 0.0003 | 0.0015 RNF26      | ring finger protein 26                                   | Coding           |
| TC1900006904.hg.1 | 8.94  | 7.98  | 1.96  | 0.0003 | 0.0015 MYO1F      | Memczak2013 ANTISENSE, CDS, coding, INTEF                | NonCoding        |
| TC0X00008724.hg.1 | 5.31  | 4.65  | 1.59  | 0.0003 | 0.0015 HMGB3      | high mobility group box 3                                | Multiple_Complex |
| TC0700006652.hg.1 | 8.43  | 7.63  | 1.73  | 0.0003 | 0.0015 ZNF316     | zinc finger protein 316                                  | Multiple_Complex |
| TC0400012798.hg.1 | 4.12  | 3.57  | 1.46  | 0.0003 | 0.0015 ADGRL3     | adhesion G protein-coupled receptor L3                   | Multiple_Complex |
| TC1000008388.hg.1 | 10.26 | 9.21  | 2.06  | 0.0003 | 0.0015 FAS        | Fas cell surface death receptor                          | Multiple_Complex |
| TC1700010198.hg.1 | 11.81 | 11.16 | 1.57  | 0.0003 | 0.0015 UNC119     | unc-119 lipid binding chaperone                          | Multiple_Complex |
| TC1600006594.hg.1 | 5.75  | 6.27  | -1.44 | 0.0003 | 0.0015 TRAF7      | TNF receptor-associated factor 7, E3 ubiquitin           | Multiple_Complex |
| TC1300008359.hg.1 | 10.04 | 11.01 | -1.96 | 0.0003 | 0.0015 PARP4      | poly(ADP-ribose) polymerase family member                | Multiple_Complex |
| TC0900011148.hg.1 | 6.12  | 5.46  | 1.58  | 0.0003 | 0.0015 CTNNA1     | catenin (cadherin-associated protein), alpha-II          | Multiple_Complex |
| TC1700012187.hg.1 | 8.06  | 9.39  | -2.52 | 0.0003 | 0.0015 TNFSF12-TI | TNFSF12-TNFSF13 readthrough                              | Coding           |
| TC1900011328.hg.1 | 17.47 | 16.79 | 1.6   | 0.0003 | 0.0015 ZNF160     | Transcript Identified by AceView, Entrez Gene            | Coding           |
| TC0400007225.hg.1 | 5.39  | 6.9   | -2.87 | 0.0003 | 0.0015 DTHD1      | death domain containing 1                                | Multiple_Complex |
| TC1700006748.hg.1 | 5.22  | 5.82  | -1.51 | 0.0003 | 0.0015 TMEM102    | transmembrane protein 102                                | Coding           |
| TC1900012022.hg.1 | 6.05  | 6.86  | -1.75 | 0.0003 | 0.0015 ZNF616     | zinc finger protein 616                                  | Multiple_Complex |
| TC0400008030.hg.1 | 5.98  | 5.36  | 1.54  | 0.0003 | 0.0015 ARHGAP24   | Rho GTPase activating protein 24                         | Multiple_Complex |
| TC1400010022.hg.1 | 8     | 8.79  | -1.73 | 0.0003 | 0.0015 BTBD7      | BTB (POZ) domain containing 7                            | Multiple_Complex |
| TC0400012956.hg.1 | 4.88  | 5.73  | -1.8  | 0.0003 | 0.0015 ELOVL6     | ELOVL fatty acid elongase 6                              | Multiple_Complex |
| TC1100006925.hg.1 | 7.66  | 8.44  | -1.72 | 0.0003 | 0.0015 PDE3B      | phosphodiesterase 3B, cGMP-inhibited                     | NonCoding        |
| TC1100006656.hg.1 | 6.82  | 8.03  | -2.31 | 0.0003 | 0.0015 OR52K2     | olfactory receptor, family 52, subfamily K, me           | Coding           |
| TC0200016548.hg.1 | 7.37  | 8.19  | -1.76 | 0.0003 | 0.0015 GPD2       | glycerol-3-phosphate dehydrogenase 2                     | Multiple_Complex |
| TC0100010815.hg.1 | 7.95  | 8.67  | -1.65 | 0.0003 | 0.0015 MR1        | major histocompatibility complex, class I-relat          | Multiple_Complex |
| TC1900011029.hg.1 | 4.38  | 3.69  | 1.61  | 0.0003 | 0.0015 MEIS3      | Meis homeobox 3                                          | Multiple_Complex |
| TC0300013696.hg.1 | 4.87  | 4.26  | 1.52  | 0.0003 | 0.0015 ZDHHC19    | zinc finger, DHHC-type containing 19                     | Multiple_Complex |
| TC1600007806.hg.1 | 7.75  | 8.17  | -1.34 | 0.0003 | 0.0015 HEATR3     | HEAT repeat containing 3                                 | Multiple_Complex |
| TC1700010199.hg.1 | 8.02  | 8.59  | -1.48 | 0.0003 | 0.0015 PIGS       | phosphatidylinositol glycan anchor biosynthes            | Multiple_Complex |
| TC1200010940.hg.1 | 4.54  | 4.14  | 1.32  | 0.0003 | 0.0015 SDR9C7     | short chain dehydrogenase/reductase family               | Coding           |
| TC0100018182.hg.1 | 8.52  | 8.02  | 1.41  | 0.0003 | 0.0015 SZRD1      | SUZ RNA binding domain containing 1                      | Multiple_Complex |
| TC0500010680.hg.1 | 8.52  | 9.74  | -2.33 | 0.0003 | 0.0015 PARP8      | Memczak2013 ANTISENSE, CDS, coding, INTEF                | NonCoding        |
| TC1100011103.hg.1 | 7.87  | 6.95  | 1.9   | 0.0003 | 0.0015 STX5       | syntaxin 5                                               | Multiple_Complex |
| TC0300010399.hg.1 | 10.13 | 9.43  | 1.62  | 0.0003 | 0.0015 SH3BP5     | SH3-domain binding protein 5 (BTK-associated)            | Multiple_Complex |
| TC0900007165.hg.1 | 6.64  | 7.32  | -1.61 | 0.0003 | 0.0015 TRMT10B    | tRNA methyltransferase 10B                               | Multiple_Complex |
| TC1300008329.hg.1 | 5.61  | 6.65  | -2.06 | 0.0003 | 0.0015 SACS       | saccin molecular chaperone                               | Multiple_Complex |
| TC0100006627.hg.1 | 5.15  | 5.7   | -1.46 | 0.0003 | 0.0015 DFFB       | DNA fragmentation factor, 40kDa, beta polypep            | Multiple_Complex |
| TC0300012527.hg.1 | 12.34 | 12.92 | -1.49 | 0.0003 | 0.0015 MSL2       | male-specific lethal 2 homolog (Drosophila)              | Coding           |
| TC0200007486.hg.1 | 6.98  | 7.7   | -1.64 | 0.0003 | 0.0015 TTC7A      | tetratricopeptide repeat domain 7A                       | Multiple_Complex |
| TC1100012730.hg.1 | 5.7   | 6.47  | -1.71 | 0.0003 | 0.0015 RPUSD4     | RNA pseudouridylylase synthase domain contain            | Multiple_Complex |
| TC0500007792.hg.1 | 12.42 | 11.33 | 2.13  | 0.0003 | 0.0016 HEXB       | hexosaminidase B (beta polypeptide)                      | Multiple_Complex |
| TC1700010518.hg.1 | 6.21  | 5.64  | 1.49  | 0.0003 | 0.0016 GPR179     | G protein-coupled receptor 179                           | Multiple_Complex |
| TC1000010911.hg.1 | 6.21  | 6.82  | -1.53 | 0.0003 | 0.0016 TYSND1     | trypsin domain containing 1                              | Multiple_Complex |
| TC1600008963.hg.1 | 7.84  | 8.33  | -1.41 | 0.0003 | 0.0016 C16orf13   | chromosome 16 open reading frame 13                      | Multiple_Complex |
| TC2000007012.hg.1 | 5.89  | 6.71  | -1.76 | 0.0003 | 0.0016 ENTPD6     | ectonucleoside triphosphate diphosphohydroly             | Multiple_Complex |
| TC0600008757.hg.1 | 18.48 | 17.06 | 2.66  | 0.0003 | 0.0016 PNRC1      | proline-rich nuclear receptor coactivator 1              | Multiple_Complex |
| TC0400007128.hg.1 | 7.08  | 7.91  | -1.78 | 0.0003 | 0.0016 TBC1D19    | TBC1 domain family, member 19                            | Multiple_Complex |
| TC0700009678.hg.1 | 6.9   | 7.83  | -1.91 | 0.0003 | 0.0016 GIMAP2     | GTPase, IMAP family member 2                             | Multiple_Complex |
| TC0Y00006632.hg.1 | 11.54 | 7.46  | 16.91 | 0.0003 | 0.0016 DDX3Y      | DEAD (Asp-Glu-Ala-Asp) box helicase 3, Y-link            | Multiple_Complex |
| TC1100008831.hg.1 | 7.16  | 6.49  | 1.6   | 0.0003 | 0.0016 ENDOD1     | endonuclease domain containing 1                         | Multiple_Complex |
| TC0800012405.hg.1 | 6.69  | 7.6   | -1.88 | 0.0003 | 0.0016 FUT10      | fucosyltransferase 10 (alpha (1,3) fucosyltrans          | Multiple_Complex |
| TC1900008013.hg.1 | 8.51  | 9.46  | -1.93 | 0.0003 | 0.0016 PSMD8      | proteasome 26S subunit, non-ATPase 8                     | Multiple_Complex |
| TC0300008518.hg.1 | 6.13  | 6.82  | -1.61 | 0.0003 | 0.0016 GTF2E1     | general transcription factor IIE subunit 1               | Multiple_Complex |
| TC0200008128.hg.1 | 4.28  | 4.75  | -1.38 | 0.0003 | 0.0016 MRPL19     | mitochondrial ribosomal protein L19                      | Multiple_Complex |
| TC1000009244.hg.1 | 7.42  | 6.53  | 1.86  | 0.0003 | 0.0016 BCCIP      | BRCA2 and CDKN1A interacting protein                     | Multiple_Complex |
| TC0100016658.hg.1 | 14.2  | 12.94 | 2.38  | 0.0003 | 0.0016 ARPC5      | actin related protein 2/3 complex subunit 5              | Multiple_Complex |
| TC0X00008857.hg.1 | 6.65  | 7.24  | -1.5  | 0.0003 | 0.0016 DKC1; SNO  | dyskeratosis congenita 1, dyskerin; small nucle          | Multiple_Complex |
| TC0600014281.hg.1 | 9.52  | 8.59  | 1.9   | 0.0003 | 0.0016 RPS10-NUC  | RPS10-NUDT3 readthrough                                  | Multiple_Complex |
| TC1600009952.hg.1 | 15.08 | 16.15 | -2.1  | 0.0003 | 0.0016 YPEL3      | yippee like 3                                            | Multiple_Complex |
| TC0700010965.hg.1 | 5.24  | 5.96  | -1.64 | 0.0003 | 0.0016 IGFBP3     | insulin like growth factor binding protein 3             | Multiple_Complex |
| TC1500010856.hg.1 | 5.88  | 7.71  | -3.55 | 0.0003 | 0.0016 EPB42      | erythrocyte membrane protein band 4.2                    | NonCoding        |
| TC1100009615.hg.1 | 9.82  | 10.49 | -1.58 | 0.0003 | 0.0016 VPS26B     | VPS26 retromer complex component B                       | Multiple_Complex |
| TC1400007310.hg.1 | 7.06  | 7.71  | -1.56 | 0.0003 | 0.0016 KIAA0586   | KIAA0586                                                 | Multiple_Complex |
| TC2000009949.hg.1 | 12.21 | 11.55 | 1.59  | 0.0003 | 0.0016 STX16      | syntaxin 16                                              | Multiple_Complex |
| TC1900010047.hg.1 | 5.34  | 5.7   | -1.29 | 0.0003 | 0.0016 NR2C2AP    | nuclear receptor 2C2-associated protein                  | Multiple_Complex |
| TC1700012296.hg.1 | 11.81 | 12.21 | -1.32 | 0.0003 | 0.0016 PRKAR1A; / | protein kinase, cAMP-dependent, regulatory, /            | Multiple_Complex |
| TC1700006702.hg.1 | 7.07  | 6.31  | 1.7   | 0.0003 | 0.0016 TXNDC17    | thioredoxin domain containing 17                         | Multiple_Complex |
| TC0900007517.hg.1 | 4.79  | 4.04  | 1.68  | 0.0003 | 0.0016 C9orf135   | chromosome 9 open reading frame 135                      | Multiple_Complex |
| TC0800007767.hg.1 | 7.68  | 6.29  | 2.63  | 0.0003 | 0.0016 RAB2A      | Memczak2013 ALT_ACCEPTOR, ALT_DONOR,                     | NonCoding        |
| TC0200015548.hg.1 | 7.47  | 8.1   | -1.55 | 0.0003 | 0.0016 METTL21A   | methyltransferase like 21A                               | Multiple_Complex |
| TC0100009046.hg.1 | 13.13 | 10.39 | 6.71  | 0.0003 | 0.0016 RPL5; SNO  | RPL5; SNO ribosomal protein L5; small nucleolar RNA, C/I | Multiple_Complex |

|                   |       |       |        |        |        |           |                                                  |                  |
|-------------------|-------|-------|--------|--------|--------|-----------|--------------------------------------------------|------------------|
| TC1700008256.hg.1 | 5.83  | 6.28  | -1.37  | 0.0003 | 0.0016 | RSAD1     | radical S-adenosyl methionine domain contain     | Multiple_Complex |
| TC0700006984.hg.1 | 11.49 | 10.23 | 2.41   | 0.0003 | 0.0016 | SNX10     | sorting nexin 10                                 | Multiple_Complex |
| TC1900011731.hg.1 | 6.15  | 5.41  | 1.67   | 0.0003 | 0.0016 | LGALS17A  | Charcot-Leyden crystal protein pseudogene        | Multiple_Complex |
| TC0900011241.hg.1 | 4.85  | 5.99  | -2.19  | 0.0003 | 0.0016 | SLC46A2   | solute carrier family 46, member 2               | Coding           |
| TC0X00010155.hg.1 | 8.29  | 9.32  | -2.04  | 0.0003 | 0.0017 | ITM2A     | integral membrane protein 2A                     | Multiple_Complex |
| TC0200006648.hg.1 | 8.08  | 8.8   | -1.65  | 0.0003 | 0.0017 | IAH1      | isoamyl acetate-hydrolyzing esterase 1 homol     | Multiple_Complex |
| TC0400009919.hg.1 | 7.82  | 8.48  | -1.57  | 0.0003 | 0.0017 | MRFAP1L1  | Morf4 family associated protein 1-like 1         | Multiple_Complex |
| TC1800007394.hg.1 | 3.8   | 3.3   | 1.41   | 0.0003 | 0.0017 | ST8SIA3   | ST8 alpha-N-acetyl-neuraminide alpha-2,8-sial    | Multiple_Complex |
| TC0700011463.hg.1 | 6.61  | 7.01  | -1.32  | 0.0003 | 0.0017 | TYW1B     | tRNA-yW synthesizing protein 1 homolog B (S.     | Multiple_Complex |
| TC0400011744.hg.1 | 12.49 | 13.66 | -2.25  | 0.0003 | 0.0017 | ANXA5     | annexin A5                                       | Multiple_Complex |
| TC0700013595.hg.1 | 4.39  | 3.88  | 1.42   | 0.0003 | 0.0017 | C7orf61   | chromosome 7 open reading frame 61               | Coding           |
| TC1200010250.hg.1 | 8.57  | 7.23  | 2.53   | 0.0003 | 0.0017 | ERGC2     | ERGC and golgi 2                                 | Multiple_Complex |
| TC1200006874.hg.1 | 5.68  | 6.49  | -1.75  | 0.0003 | 0.0017 | BORCS5    | BLOC-1 related complex subunit 5                 | Multiple_Complex |
| TC0100013374.hg.1 | 5.77  | 5.14  | 1.55   | 0.0003 | 0.0017 | TRIM63    | tripartite motif containing 63, E3 ubiquitin prc | Multiple_Complex |
| TC0200016494.hg.1 | 6.01  | 6.64  | -1.55  | 0.0003 | 0.0017 | CNNM4     | cyclin and CBS domain divalent metal cation t    | Multiple_Complex |
| TC0100014562.hg.1 | 6.89  | 7.4   | -1.43  | 0.0004 | 0.0017 | LRRC40    | leucine rich repeat containing 40                | Multiple_Complex |
| TC0400008376.hg.1 | 9.19  | 9.7   | -1.42  | 0.0004 | 0.0017 | SEC24B    | SEC24 homolog B, COPII coat complex compo        | Multiple_Complex |
| TC0800007735.hg.1 | 11.91 | 11.09 | 1.76   | 0.0004 | 0.0017 | UBXN2B    | UBX domain protein 2B                            | Multiple_Complex |
| TC0800008641.hg.1 | 7.11  | 6.4   | 1.64   | 0.0004 | 0.0017 | MED30     | mediator complex subunit 30                      | Multiple_Complex |
| TC1900008755.hg.1 | 7.39  | 6.17  | 2.32   | 0.0004 | 0.0017 | ZNF331    | zinc finger protein 331                          | Multiple_Complex |
| TC1400010728.hg.1 | 5.08  | 5.86  | -1.72  | 0.0004 | 0.0017 | HEATR5A   | HEAT repeat containing 5A                        | Multiple_Complex |
| TC1100010762.hg.1 | 7.49  | 8.18  | -1.61  | 0.0004 | 0.0017 | NUP160    | nucleoporin 160kDa                               | Multiple_Complex |
| TC1700008498.hg.1 | 8.8   | 9.19  | -1.31  | 0.0004 | 0.0017 | PPM1D     | protein phosphatase, Mg2+/Mn2+ dependent         | Multiple_Complex |
| TC1000012570.hg.1 | 8.93  | 8.16  | 1.69   | 0.0004 | 0.0017 | NDST2     | N-deacetylase/N-sulfotransferase (heparan gli    | Multiple_Complex |
| TC1200012702.hg.1 | 5.46  | 6.03  | -1.49  | 0.0004 | 0.0017 | FICD      | FIC domain containing                            | Coding           |
| TC0600014148.hg.1 | 12.29 | 11.41 | 1.84   | 0.0004 | 0.0017 | CYB5R4    | cytochrome b5 reductase 4                        | Multiple_Complex |
| TC0700013609.hg.1 | 7.58  | 8.83  | -2.37  | 0.0004 | 0.0017 | TFEC      | transcription factor EC                          | Multiple_Complex |
| TC0200011965.hg.1 | 7.12  | 7.94  | -1.76  | 0.0004 | 0.0017 | ATAD2B    | ATPase family, AAA domain containing 2B          | Multiple_Complex |
| TC0200006476.hg.1 | 6.5   | 7.1   | -1.53  | 0.0004 | 0.0017 | SNTG2     | syntrophin, gamma 2                              | Multiple_Complex |
| TC1600011341.hg.1 | 5.15  | 5.97  | -1.77  | 0.0004 | 0.0017 | ZNF174    | zinc finger protein 174                          | Multiple_Complex |
| TC0100015061.hg.1 | 6.13  | 6.57  | -1.36  | 0.0004 | 0.0017 | DBT       | dihydroliipoamide branched chain transacylase    | Multiple_Complex |
| TC1900011637.hg.1 | 4.16  | 4.82  | -1.58  | 0.0004 | 0.0017 | MZF1      | myeloid zinc finger 1                            | Multiple_Complex |
| TC1600008646.hg.1 | 5.37  | 4.87  | 1.42   | 0.0004 | 0.0018 | ATP2C2    | ATPase, Ca++ transporting, type 2C, member :     | Multiple_Complex |
| TC1100011083.hg.1 | 8.05  | 8.87  | -1.76  | 0.0004 | 0.0018 | AHNAK     | AHNAK nucleoprotein                              | Multiple_Complex |
| TC0300007479.hg.1 | 5.07  | 4.4   | 1.59   | 0.0004 | 0.0018 | PHF7      | PHD finger protein 7                             | Multiple_Complex |
| TC0300013356.hg.1 | 5.24  | 4.85  | 1.31   | 0.0004 | 0.0018 | MAP6D1    | MAP6 domain containing 1                         | Multiple_Complex |
| TC0800008467.hg.1 | 8.81  | 7.87  | 1.91   | 0.0004 | 0.0018 | ATP6V1C1  | ATPase, H+ transporting, lysosomal 42kDa, V1     | Multiple_Complex |
| TC1900008114.hg.1 | 8.27  | 7.71  | 1.47   | 0.0004 | 0.0018 | LTBP4     | Transcript Identified by AceView, Entrez Gene    | Unassigned       |
| TC0600007825.hg.1 | 13.38 | 11.41 | 3.91   | 0.0004 | 0.0018 | MAPK14    | mitogen-activated protein kinase 14              | Multiple_Complex |
| TC0500007122.hg.1 | 8.35  | 7.71  | 1.56   | 0.0004 | 0.0018 | BRX1      | BRX1, biogenesis of ribosomes                    | Multiple_Complex |
| TC1800008903.hg.1 | 6.76  | 7.38  | -1.54  | 0.0004 | 0.0018 | KDSR      | 3-ketodihydroshingosine reductase                | Multiple_Complex |
| TC1600011570.hg.1 | 7.6   | 6.86  | 1.67   | 0.0004 | 0.0018 | CMC2      | C-x(9)-C motif containing 2                      | Multiple_Complex |
| TC1700012141.hg.1 | 10.22 | 9.54  | 1.6    | 0.0004 | 0.0018 | WDR45B    | WD repeat domain 45B                             | Multiple_Complex |
| TC1100009004.hg.1 | 6.26  | 6.88  | -1.54  | 0.0004 | 0.0018 | FDX1      | ferredoxin 1                                     | Coding           |
| TC1700008282.hg.1 | 7.01  | 6.23  | 1.72   | 0.0004 | 0.0018 | NME1; NM  | NME/NM23 nucleoside diphosphate kinase 1;        | Multiple_Complex |
| TC1100013185.hg.1 | 9.03  | 7.79  | 2.36   | 0.0004 | 0.0018 | FAU       | Finkel-Biskis-Reilly murine sarcoma virus (FBR   | Multiple_Complex |
| TC1200012875.hg.1 | 4.4   | 5.26  | -1.81  | 0.0004 | 0.0018 | GOLGA3    | golgin A3                                        | Multiple_Complex |
| TC0200008084.hg.1 | 6.24  | 6.82  | -1.49  | 0.0004 | 0.0018 | TTC31     | tetratricopeptide repeat domain 31               | Multiple_Complex |
| TC1700006612.hg.1 | 7.39  | 6.45  | 1.92   | 0.0004 | 0.0018 | CYB5D2    | Transcript Identified by AceView, Entrez Gene    | Unassigned       |
| TC0400006818.hg.1 | 5.01  | 4.47  | 1.45   | 0.0004 | 0.0018 | USP17L28; | ubiquitin specific peptidase 17-like family mer  | Coding           |
| TC0300006793.hg.1 | 4.69  | 5.47  | -1.71  | 0.0004 | 0.0018 | KAT2B     | Transcript Identified by AceView, Entrez Gene    | Unassigned       |
| TC1700009274.hg.1 | 5.58  | 6.33  | -1.68  | 0.0004 | 0.0018 | FN3KRP    | fructosamine 3 kinase related protein            | Multiple_Complex |
| TC0100009580.hg.1 | 5.05  | 5.75  | -1.63  | 0.0004 | 0.0018 | WDR3      | WD repeat domain 3                               | Multiple_Complex |
| TC0X00011083.hg.1 | 6.52  | 5.8   | 1.64   | 0.0004 | 0.0018 | TMEM185;  | transmembrane protein 185A                       | Multiple_Complex |
| TC0100009900.hg.1 | 3.97  | 3.42  | 1.46   | 0.0004 | 0.0018 | CIART     | circadian associated repressor of transcription  | Multiple_Complex |
| TC0400012938.hg.1 | 6.93  | 5.93  | 2      | 0.0004 | 0.0018 | RASGEF1B  | RasGEF domain family member 1B                   | Multiple_Complex |
| TC0500011490.hg.1 | 6.3   | 7.33  | -2.03  | 0.0004 | 0.0018 | TTC37     | tetratricopeptide repeat domain 37               | Multiple_Complex |
| TC1600009165.hg.1 | 5.65  | 6.79  | -2.2   | 0.0004 | 0.0018 | MMP25-AS  | MMP25 antisense RNA 1                            | NonCoding        |
| TC1900011770.hg.1 | 15.37 | 14.11 | 2.38   | 0.0004 | 0.0018 | CSAR1     | complement component 5a receptor 1               | Multiple_Complex |
| TC0400011978.hg.1 | 5.93  | 6.97  | -2.06  | 0.0004 | 0.0018 | TBC1D9    | TBC1 domain family, member 9 (with GRAM d        | Multiple_Complex |
| TC2100007208.hg.1 | 12    | 15.91 | -15.03 | 0.0004 | 0.0018 | MX1       | MX dynamin-like GTPase 1                         | Multiple_Complex |
| TC2000007817.hg.1 | 7.86  | 8.93  | -2.1   | 0.0004 | 0.0018 | FAM210B   | family with sequence similarity 210, member i    | Multiple_Complex |
| TC0500008296.hg.1 | 7.76  | 8.22  | -1.38  | 0.0004 | 0.0018 | MAN2A1    | mannosidase, alpha, class 2A, member 1           | Multiple_Complex |
| TC1200007043.hg.1 | 5.2   | 4.32  | 1.84   | 0.0004 | 0.0018 | SLCO1C1   | solute carrier organic anion transporter family  | Multiple_Complex |
| TC1100009309.hg.1 | 14.68 | 13.35 | 2.52   | 0.0004 | 0.0018 | SORL1     | sortilin-related receptor, L(DLR class) A repeat | Multiple_Complex |
| TC1300006520.hg.1 | 10.7  | 9.69  | 2.02   | 0.0004 | 0.0018 | SAP18     | Sin3A associated protein 18kDa                   | Multiple_Complex |
| TC1200009981.hg.1 | 7.08  | 8.28  | -2.29  | 0.0004 | 0.0019 | HEBP1     | heme binding protein 1                           | Multiple_Complex |
| TC1900007744.hg.1 | 7.84  | 6.81  | 2.04   | 0.0004 | 0.0019 | DPY19L3   | dpy-19-like 3 (C. elegans)                       | Multiple_Complex |
| TC1100010945.hg.1 | 4.62  | 4.99  | -1.29  | 0.0004 | 0.0019 | OR5B21    | olfactory receptor, family 5, subfamily B, merr  | Coding           |
| TC1600011545.hg.1 | 7.04  | 7.83  | -1.73  | 0.0004 | 0.0019 | PLLP      | plasmolipin                                      | NonCoding        |

|                   |       |       |       |        |                   |                                                   |                  |
|-------------------|-------|-------|-------|--------|-------------------|---------------------------------------------------|------------------|
| TC1600007803.hg.1 | 10.31 | 9.3   | 2.02  | 0.0004 | 0.0019 CNEP1R1    | CTD nuclear envelope phosphatase 1 regulato       | Multiple_Complex |
| TC0100015783.hg.1 | 7.86  | 8.49  | -1.55 | 0.0004 | 0.0019 RFX5       | regulatory factor X, 5 (influences HLA class II e | Multiple_Complex |
| TC0X00008862.hg.1 | 7.62  | 6.45  | 2.25  | 0.0004 | 0.0019 FUNDC2     | FUN14 domain containing 2                         | Multiple_Complex |
| TC0200011901.hg.1 | 12.02 | 12.8  | -1.72 | 0.0004 | 0.0019 PUM2       | pumilio RNA binding family member 2               | Multiple_Complex |
| TC0800012308.hg.1 | 5.98  | 6.43  | -1.37 | 0.0004 | 0.0019 ADHFE1; C  | alcohol dehydrogenase, iron containing 1; chr     | Multiple_Complex |
| TC0100010806.hg.1 | 9.02  | 9.82  | -1.74 | 0.0004 | 0.0019 XPR1       | xenotropic and polytropic retrovirus receptor     | Multiple_Complex |
| TC0900012178.hg.1 | 6.96  | 7.6   | -1.56 | 0.0004 | 0.0019 GLE1       | GLE1 RNA export mediator                          | Multiple_Complex |
| TC0100018353.hg.1 | 5.63  | 6.22  | -1.5  | 0.0004 | 0.0019 SNAP47     | synaptosome associated protein 47kDa              | Multiple_Complex |
| TC1200012704.hg.1 | 7.74  | 8.25  | -1.42 | 0.0004 | 0.0019 TCHP       | trichoplein, keratin filament binding             | Multiple_Complex |
| TC1000012162.hg.1 | 7.68  | 8.35  | -1.59 | 0.0004 | 0.0019 UROS       | uroporphyrinogen III synthase                     | Multiple_Complex |
| TC1300007969.hg.1 | 10.73 | 9.72  | 2.01  | 0.0004 | 0.0019 ABHD13     | abhydrolase domain containing 13                  | Coding           |
| TC0100018540.hg.1 | 6.16  | 6.77  | -1.53 | 0.0004 | 0.0019 ACBD6      | acyl-CoA binding domain containing 6              | Multiple_Complex |
| TC2200009310.hg.1 | 8.53  | 7.96  | 1.48  | 0.0004 | 0.0019 GAB4       | GRB2-associated binding protein family, mem       | Multiple_Complex |
| TC1400006551.hg.1 | 8.57  | 7.38  | 2.28  | 0.0004 | 0.0019 ARHGGEF40  | Rho guanine nucleotide exchange factor (GEF)      | Multiple_Complex |
| TC1500007860.hg.1 | 6.12  | 6.94  | -1.77 | 0.0004 | 0.0019 MPI        | mannose phosphate isomerase                       | Multiple_Complex |
| TC1900009299.hg.1 | 8.14  | 8.69  | -1.46 | 0.0004 | 0.0019 CACTIN     | actin, spliceosome C complex subunit              | Multiple_Complex |
| TC0600008539.hg.1 | 5.15  | 4.47  | 1.6   | 0.0004 | 0.0019 CD109      | CD109 molecule                                    | Multiple_Complex |
| TC1200012265.hg.1 | 8.37  | 7.19  | 2.26  | 0.0004 | 0.0019 CDK2AP1    | cyclin-dependent kinase 2 associated protein      | Multiple_Complex |
| TC1400008597.hg.1 | 4.89  | 4.35  | 1.45  | 0.0004 | 0.0019 RNASE12; F | ribonuclease, RNase A family, 12 (non-active);    | Multiple_Complex |
| TC1100013205.hg.1 | 9.69  | 8.46  | 2.34  | 0.0004 | 0.0019 ARAP1      | ArfGAP with RhoGAP domain, ankyrin repeat         | Multiple_Complex |
| TC0600013204.hg.1 | 8.53  | 7.06  | 2.78  | 0.0004 | 0.0019 VNN3       | vanin 3                                           | Multiple_Complex |
| TC0100007254.hg.1 | 7.05  | 6.47  | 1.5   | 0.0004 | 0.0019 LDLRAD2    | low density lipoprotein receptor class A doma     | Multiple_Complex |
| TC0200009487.hg.1 | 12.26 | 11.17 | 2.13  | 0.0004 | 0.0019 SPOPL      | speckle-type POZ protein-like                     | Multiple_Complex |
| TC2000007670.hg.1 | 4.44  | 3.74  | 1.63  | 0.0004 | 0.0019 SNAI1      | snail family zinc finger 1                        | Coding           |
| TC0500011255.hg.1 | 4.43  | 5.04  | -1.53 | 0.0004 | 0.0019 MTX3       | metaxin 3                                         | Multiple_Complex |
| TC0100015155.hg.1 | 9.09  | 8.48  | 1.53  | 0.0004 | 0.0019 VAV3       | vav 3 guanine nucleotide exchange factor          | Multiple_Complex |
| TC0400010558.hg.1 | 8.03  | 8.48  | -1.36 | 0.0004 | 0.002 ATP8A1      | ATPase, aminophospholipid transporter (APLT       | Multiple_Complex |
| TC0400012989.hg.1 | 5.56  | 6.13  | -1.49 | 0.0004 | 0.002 TMEM192     | transmembrane protein 192                         | Multiple_Complex |
| TC0700012712.hg.1 | 14.29 | 13.6  | 1.61  | 0.0004 | 0.002 LUZP6; MTI  | leucine zipper protein 6; myotrophin              | Multiple_Complex |
| TC0100013182.hg.1 | 6.42  | 7.2   | -1.72 | 0.0004 | 0.002 CAMK2N1     | calcium/calmodulin-dependent protein kinase       | Multiple_Complex |
| TC0200008554.hg.1 | 8.33  | 7.46  | 1.83  | 0.0004 | 0.002 COX5B       | cytochrome c oxidase subunit Vb                   | Multiple_Complex |
| TC1100011240.hg.1 | 6.13  | 5.58  | 1.46  | 0.0004 | 0.002 KCNK7       | potassium channel, two pore domain subfami        | Coding           |
| TC1100010033.hg.1 | 4.2   | 5     | -1.74 | 0.0004 | 0.002 TRIM66      | tripartite motif containing 66                    | Multiple_Complex |
| TC0100013854.hg.1 | 6.73  | 7.44  | -1.64 | 0.0004 | 0.002 SCMH1       | sex comb on midleg homolog 1 (Drosophila)         | Multiple_Complex |
| TC0300013143.hg.1 | 4.19  | 3.73  | 1.38  | 0.0004 | 0.002 GHSR        | growth hormone secretagogue receptor              | Coding           |
| TC0700012760.hg.1 | 5.93  | 5.31  | 1.53  | 0.0004 | 0.002 ZC3HAV1L    | zinc finger CCH-type, antiviral 1-like            | Multiple_Complex |
| TC0600007060.hg.1 | 12.21 | 10.81 | 2.63  | 0.0004 | 0.002 MYLIP; MIR  | myosin regulatory light chain interacting prote   | Multiple_Complex |
| TC1000011368.hg.1 | 7.59  | 6.14  | 2.72  | 0.0004 | 0.002 ANKRD22     | ankyrin repeat domain 22                          | Multiple_Complex |
| TC1300007130.hg.1 | 5.29  | 4.66  | 1.55  | 0.0004 | 0.002 NUDT15      | nudix hydrolase 15                                | Coding           |
| TC1600010406.hg.1 | 6.99  | 6.31  | 1.6   | 0.0004 | 0.002 AMFR        | autocrine motility factor receptor, E3 ubiquitir  | Multiple_Complex |
| TC0100018406.hg.1 | 5.88  | 5.09  | 1.72  | 0.0004 | 0.002 HNRNPCL1    | heterogeneous nuclear ribonucleoprotein C-III     | Coding           |
| TC0100014790.hg.1 | 4.76  | 4.1   | 1.57  | 0.0004 | 0.002 COL24A1     | collagen, type XXIV, alpha 1                      | Multiple_Complex |
| TC1200006909.hg.1 | 4.06  | 3.56  | 1.41  | 0.0004 | 0.002 EMP1        | epithelial membrane protein 1                     | Multiple_Complex |
| TC0200015741.hg.1 | 5.68  | 6.31  | -1.55 | 0.0004 | 0.002 RNF25       | ring finger protein 25                            | Multiple_Complex |
| TC0800007110.hg.1 | 5.02  | 5.93  | -1.88 | 0.0004 | 0.002 EPHX2       | epoxide hydrolase 2, cytoplasmic                  | Multiple_Complex |
| TC0300013983.hg.1 | 6.08  | 6.66  | -1.5  | 0.0004 | 0.002 NAT6        | N-acetyltransferase 6 (GCN5-related)              | Coding           |
| TC0X00006590.hg.1 | 7.32  | 6.46  | 1.82  | 0.0004 | 0.002 WWC3        | WWC family member 3                               | Multiple_Complex |
| TC0700011586.hg.1 | 7.64  | 8.59  | -1.93 | 0.0004 | 0.002 GSAP        | gamma-secretase activating protein                | Multiple_Complex |
| TC0100009889.hg.1 | 7.68  | 8.84  | -2.23 | 0.0004 | 0.002 VPS45       | vacuolar protein sorting 45 homolog (S. cerevi    | Multiple_Complex |
| TC1700010738.hg.1 | 8.84  | 9.45  | -1.52 | 0.0004 | 0.002 EZH1        | enhancer of zeste 1 polycomb repressive com       | Multiple_Complex |
| TC0700008617.hg.1 | 6.56  | 5.8   | 1.7   | 0.0004 | 0.002 SH2B2       | SH2B adaptor protein 2                            | Multiple_Complex |
| TC0100007659.hg.1 | 10.06 | 10.79 | -1.66 | 0.0004 | 0.002 KHDRBS1     | KH domain containing, RNA binding, signal tra     | Multiple_Complex |
| TC0100010060.hg.1 | 15.89 | 12.51 | 10.4  | 0.0004 | 0.002 RPS27       | ribosomal protein S27                             | Multiple_Complex |
| TC1600011472.hg.1 | 8.94  | 9.46  | -1.43 | 0.0004 | 0.0021 NMRAL1     | NmrA-like family domain containing 1              | Multiple_Complex |
| TC0X00007266.hg.1 | 3.55  | 4.35  | -1.75 | 0.0004 | 0.0021 GSPT2      | G1 to S phase transition 2                        | Coding           |
| TC0100017733.hg.1 | 6.17  | 5.09  | 2.11  | 0.0004 | 0.0021 TSNAX      | Memczak2013 ANTISENSE, CDS, coding, INTEF         | NonCoding        |
| TC1700012228.hg.1 | 9.55  | 10.11 | -1.48 | 0.0004 | 0.0021 LRR37B     | leucine rich repeat containing 37B                | Multiple_Complex |
| TC0800009854.hg.1 | 6.8   | 6.03  | 1.71  | 0.0004 | 0.0021 BIN3-IT1   | BIN3 intronic transcript 1                        | Multiple_Complex |
| TC0100014228.hg.1 | 5.31  | 6.05  | -1.67 | 0.0004 | 0.0021 LRP8       | LDL receptor related protein 8                    | Multiple_Complex |
| TC0800006760.hg.1 | 9.47  | 9.97  | -1.42 | 0.0004 | 0.0021 FDFT1      | farnesyl-diphosphate farnesyltransferase 1        | Multiple_Complex |
| TC0100007188.hg.1 | 6.89  | 6.17  | 1.65  | 0.0004 | 0.0021 PLA2G5     | phospholipase A2, group V                         | Multiple_Complex |
| TC0100013466.hg.1 | 7.21  | 7.81  | -1.52 | 0.0004 | 0.0021 SPCS2      | signal peptidase complex subunit 2                | Multiple_Complex |
| TC1600009864.hg.1 | 4.02  | 3.55  | 1.38  | 0.0004 | 0.0021 IL27       | interleukin 27                                    | Coding           |
| TC1600006941.hg.1 | 7.85  | 8.61  | -1.69 | 0.0004 | 0.0021 SNX29      | sorting nexin 29                                  | Multiple_Complex |
| TC1200010205.hg.1 | 5.5   | 4.76  | 1.67  | 0.0004 | 0.0021 C12orf71   | chromosome 12 open reading frame 71               | Coding           |
| TC0100008033.hg.1 | 6.14  | 6.88  | -1.66 | 0.0004 | 0.0021 ERMAPP     | erythroblast membrane-associated protein (St      | Multiple_Complex |
| TC0900007604.hg.1 | 14.6  | 13.49 | 2.15  | 0.0004 | 0.0021 OSTF1      | osteoclast stimulating factor 1                   | Multiple_Complex |
| TC1100011643.hg.1 | 10.74 | 11.37 | -1.55 | 0.0004 | 0.0021 ARR81      | arrestin, beta 1                                  | Multiple_Complex |
| TC1000011975.hg.1 | 11.93 | 11.56 | 1.29  | 0.0004 | 0.0021 CACUL1     | CDK2-associated, cullin domain 1                  | Multiple_Complex |
| TC0800010103.hg.1 | 9.17  | 9.74  | -1.49 | 0.0004 | 0.0021 LSM12      | Homo sapiens LSM12 homolog (S. cerevisiae),       | Multiple_Complex |

|                      |       |       |         |        |                       |                                                           |                  |
|----------------------|-------|-------|---------|--------|-----------------------|-----------------------------------------------------------|------------------|
| TC1900012058.hg.1    | 7.92  | 8.89  | -1.96   | 0.0004 | 0.0021 ZNF417         | zinc finger protein 417                                   | Multiple_Complex |
| TC0400012759.hg.1    | 8.62  | 9.31  | -1.62   | 0.0004 | 0.0021 FAM193A        | family with sequence similarity 193, member               | Multiple_Complex |
| TC1900011228.hg.1    | 4.88  | 4.42  | 1.38    | 0.0004 | 0.0021 KLK5           | kallikrein related peptidase 5                            | Multiple_Complex |
| TC2000006541.hg.1    | 5.08  | 5.76  | -1.61   | 0.0004 | 0.0021 ITPA           | inosine triphosphatase (nucleoside triphosphatase)        | Multiple_Complex |
| TC0800007016.hg.1    | 10.47 | 9.16  | 2.47    | 0.0005 | 0.0021 CHMP7          | Transcript Identified by AceView, Entrez Gene             | Unassigned       |
| TC0700011488.hg.1    | 7.19  | 7.76  | -1.49   | 0.0005 | 0.0021 NSUN5          | NOP2/Sun domain family, member 5                          | Multiple_Complex |
| TC1700007913.hg.1    | 4.8   | 4.02  | 1.72    | 0.0005 | 0.0021 RAMP2          | receptor (G protein-coupled) activity modifier            | Multiple_Complex |
| TC1900011872.hg.1    | 5.41  | 6.13  | -1.64   | 0.0005 | 0.0021 ECSIT          | ECSIT signalling integrator                               | Multiple_Complex |
| TSUnmapped00000582.h | 7.86  | 8.65  | -1.73   | 0.0005 | 0.0021 ZNF780A        | zinc finger protein 780A                                  | Coding           |
| TC1100012646.hg.1    | 4.34  | 3.73  | 1.53    | 0.0005 | 0.0021 TMEM225        | transmembrane protein 225                                 | Coding           |
| TC0100009738.hg.1    | 7.36  | 8.25  | -1.86   | 0.0005 | 0.0021 GPR89A         | G protein-coupled receptor 89A                            | Multiple_Complex |
| TC0700008662.hg.1    | 6.89  | 7.41  | -1.43   | 0.0005 | 0.0021 ARMCL0         | armadillo repeat containing 10                            | Multiple_Complex |
| TSUnmapped00000722.h | 5.82  | 5.2   | 1.54    | 0.0005 | 0.0021 TRAPPC4        | trafficking protein particle complex 4                    | NonCoding        |
| TC0600011808.hg.1    | 5.24  | 5.99  | -1.69   | 0.0005 | 0.0022 MED20          | mediator complex subunit 20                               | Multiple_Complex |
| TC0700009481.hg.1    | 4.2   | 3.83  | 1.29    | 0.0005 | 0.0022 PIP            | prolactin-induced protein                                 | Coding           |
| TC0200008921.hg.1    | 6.39  | 6.88  | -1.4    | 0.0005 | 0.0022 TTL            | tubulin tyrosine ligase                                   | Multiple_Complex |
| TC0100007693.hg.1    | 7.36  | 8.21  | -1.8    | 0.0005 | 0.0022 S100BPB        | S100P binding protein                                     | Multiple_Complex |
| TC0X00008470.hg.1    | 7.97  | 8.46  | -1.4    | 0.0005 | 0.0022 PHF6           | PHD finger protein 6                                      | Multiple_Complex |
| TC1300008997.hg.1    | 9.35  | 8     | 2.55    | 0.0005 | 0.0022 DHRS12         | dehydrogenase/reductase (SDR family) member               | Multiple_Complex |
| TC1700012093.hg.1    | 4.91  | 5.57  | -1.58   | 0.0005 | 0.0022 FASN           | fatty acid synthase                                       | Multiple_Complex |
| TC0300008467.hg.1    | 6.3   | 7.51  | -2.33   | 0.0005 | 0.0022 ARHGAP31       | Rho GTPase activating protein 31                          | Multiple_Complex |
| TC1900006895.hg.1    | 7.23  | 6.4   | 1.78    | 0.0005 | 0.0022 2-Mar          | membrane associated ring finger 2                         | Multiple_Complex |
| TC2200006540.hg.1    | 4.78  | 7.99  | -9.27   | 0.0005 | 0.0022 USP18          | ubiquitin specific peptidase 18                           | Multiple_Complex |
| TC0300011109.hg.1    | 7.01  | 7.8   | -1.73   | 0.0005 | 0.0022 TMEM115        | transmembrane protein 115                                 | Multiple_Complex |
| TC1200009734.hg.1    | 8.64  | 9.24  | -1.52   | 0.0005 | 0.0022 VAMP1          | vesicle associated membrane protein 1                     | Multiple_Complex |
| TC0X00007612.hg.1    | 5.65  | 5.92  | -1.21   | 0.0005 | 0.0022 CHIC1          | cysteine rich hydrophobic domain 1                        | Multiple_Complex |
| TC0200007058.hg.1    | 9.53  | 10.1  | -1.49   | 0.0005 | 0.0022 ATRAID         | all-trans retinoic acid-induced differentiation factor    | Multiple_Complex |
| TC2100006922.hg.1    | 6.16  | 6.9   | -1.66   | 0.0005 | 0.0022 EVA1C          | eva-1 homolog C (C. elegans)                              | Multiple_Complex |
| TC0600011457.hg.1    | 7.25  | 7.79  | -1.46   | 0.0005 | 0.0022 LSM2           | LSM2 homolog, U6 small nuclear RNA and mR                 | Multiple_Complex |
| TC1700012329.hg.1    | 5.98  | 6.6   | -1.54   | 0.0005 | 0.0022 METTL16        | methyltransferase like 16                                 | Multiple_Complex |
| TC0400012143.hg.1    | 8.42  | 7.89  | 1.44    | 0.0005 | 0.0022 FBXW7          | F-box and WD repeat domain containing 7, E3               | Multiple_Complex |
| TC1700008303.hg.1    | 3.72  | 3.13  | 1.51    | 0.0005 | 0.0022 C17orf112      | chromosome 17 open reading frame 112                      | Multiple_Complex |
| TC1200010281.hg.1    | 9.43  | 10.27 | -1.8    | 0.0005 | 0.0022 FAM60A         | family with sequence similarity 60, member A              | Multiple_Complex |
| TC0600009683.hg.1    | 9.4   | 8.66  | 1.67    | 0.0005 | 0.0022 AIG1           | androgen-induced 1                                        | Multiple_Complex |
| TC0700007859.hg.1    | 5.1   | 5.93  | -1.78   | 0.0005 | 0.0022 TYW1           | tRNA-yW synthesizing protein 1 homolog (S. cerevisiae)    | Multiple_Complex |
| TC0100008815.hg.1    | 6.9   | 14.02 | -139.53 | 0.0005 | 0.0022 IFI44L         | interferon-induced protein 44-like                        | Multiple_Complex |
| TC0300008086.hg.1    | 4.77  | 5.7   | -1.9    | 0.0005 | 0.0022 ARL6           | ADP-ribosylation factor like GTPase 6                     | Multiple_Complex |
| TC0900009437.hg.1    | 7.55  | 8.16  | -1.52   | 0.0005 | 0.0022 AK3            | adenylate kinase 3                                        | Multiple_Complex |
| TC1900006835.hg.1    | 6.2   | 6.83  | -1.55   | 0.0005 | 0.0022 ZNF557         | zinc finger protein 557                                   | Multiple_Complex |
| TC1100006812.hg.1    | 10.53 | 9.7   | 1.77    | 0.0005 | 0.0022 ZNF143         | zinc finger protein 143                                   | Multiple_Complex |
| TC1400007244.hg.1    | 6.92  | 6.07  | 1.8     | 0.0005 | 0.0022 KTN1           | kinectin 1 (kinesin receptor)                             | Multiple_Complex |
| TC0100012946.hg.1    | 4.55  | 3.97  | 1.5     | 0.0005 | 0.0022 PRAMEF8        | PRAME family member 8                                     | Coding           |
| TC0500013320.hg.1    | 5.25  | 6.33  | -2.11   | 0.0005 | 0.0022 GTF2H2         | general transcription factor IIH subunit 2                | NonCoding        |
| TC0600007508.hg.1    | 10.27 | 11.41 | -2.19   | 0.0005 | 0.0022 PPP1R11        | protein phosphatase 1, regulatory (inhibitor) subunit 11  | Coding           |
| TC1200012622.hg.1    | 6.13  | 7.37  | -2.36   | 0.0005 | 0.0022 SLC48A1        | solute carrier family 48 (heme transporter), member 1     | Multiple_Complex |
| TC0500012568.hg.1    | 4.78  | 5.64  | -1.82   | 0.0005 | 0.0022 GEMIN5         | gem nuclear organelle associated protein 5                | Multiple_Complex |
| TC1900010163.hg.1    | 7.96  | 8.67  | -1.64   | 0.0005 | 0.0023 ZNF43          | zinc finger protein 43                                    | Multiple_Complex |
| TC0400008879.hg.1    | 9.43  | 10.37 | -1.91   | 0.0005 | 0.0023 GAB1           | GRB2-associated binding protein 1                         | Multiple_Complex |
| TC0200014899.hg.1    | 6.81  | 7.62  | -1.75   | 0.0005 | 0.0023 METTL8         | methyltransferase like 8                                  | Multiple_Complex |
| TC1900011851.hg.1    | 7.99  | 8.69  | -1.62   | 0.0005 | 0.0023 NDUFA11        | NADH dehydrogenase (ubiquinone) 1 alpha subunit           | Multiple_Complex |
| TC1400009709.hg.1    | 6.35  | 6.94  | -1.51   | 0.0005 | 0.0023 MLH3           | mutL homolog 3                                            | Multiple_Complex |
| TC0500009649.hg.1    | 6.19  | 6.71  | -1.43   | 0.0005 | 0.0023 RMND5B         | required for meiotic nuclear division 5 homolog B         | Multiple_Complex |
| TC0100009611.hg.1    | 5.02  | 4.53  | 1.41    | 0.0005 | 0.0023 HSD3B2         | hydroxy-delta-5-steroid dehydrogenase, 3 beta             | Multiple_Complex |
| TC0700013059.hg.1    | 6.46  | 7.3   | -1.79   | 0.0005 | 0.0023 FASTK          | Fas-activated serine/threonine kinase                     | Multiple_Complex |
| TC0300011023.hg.1    | 16.06 | 17.5  | -2.71   | 0.0005 | 0.0023 SHISA5         | shisa family member 5                                     | Multiple_Complex |
| TC1700006741.hg.1    | 5.23  | 5.83  | -1.51   | 0.0005 | 0.0023 KCTD11         | potassium channel tetramerization domain containing 11    | Multiple_Complex |
| TC0700009346.hg.1    | 4.8   | 4.43  | 1.29    | 0.0005 | 0.0023 CLEC2L         | C-type lectin domain family 2, member L                   | Multiple_Complex |
| TC1900009765.hg.1    | 6.08  | 6.95  | -1.83   | 0.0005 | 0.0023 LYL1           | lymphoblastic leukemia associated hematopoietic protein 1 | Multiple_Complex |
| TC1600007345.hg.1    | 9.49  | 8.61  | 1.83    | 0.0005 | 0.0023 APOBR          | apolipoprotein B receptor                                 | Coding           |
| TC1800009233.hg.1    | 6.31  | 7.39  | -2.11   | 0.0005 | 0.0023 ATP8B1         | Salzman2013 ANTISENSE, CDS, coding, INTERNAL              | NonCoding        |
| TC1100010713.hg.1    | 5.7   | 6.38  | -1.59   | 0.0005 | 0.0023 CKAP5; SNCAIP5 | cytoskeleton associated protein 5; small nuclear GTPase   | Multiple_Complex |
| TC0200012091.hg.1    | 4.45  | 5.34  | -1.85   | 0.0005 | 0.0023 ZNF512         | Memczak2013 ANTISENSE, coding, INTERNAL                   | NonCoding        |
| TC0X00008866.hg.1    | 7.57  | 6.53  | 2.06    | 0.0005 | 0.0023 VBP1           | von Hippel-Lindau binding protein 1                       | Multiple_Complex |
| TC2000009968.hg.1    | 6.93  | 8.61  | -3.19   | 0.0005 | 0.0023 SIRPB2         | signal-regulatory protein beta 2                          | Multiple_Complex |
| TSUnmapped00000252.h | 5.77  | 4.81  | 1.94    | 0.0005 | 0.0023 TRAPPC4        | trafficking protein particle complex 4                    | NonCoding        |
| TC1400010729.hg.1    | 6.72  | 7.29  | -1.48   | 0.0005 | 0.0023 DTD2           | D-tyrosyl-tRNA deacylase 2 (putative)                     | Multiple_Complex |
| TC1800008123.hg.1    | 4.33  | 4.95  | -1.54   | 0.0005 | 0.0023 CEP76          | centrosomal protein 76kDa                                 | Multiple_Complex |
| TC1900010209.hg.1    | 7.42  | 7.9   | -1.4    | 0.0005 | 0.0023 ZNF724P        | zinc finger protein 724, pseudogene                       | Multiple_Complex |
| TC1900006574.hg.1    | 6.25  | 5.67  | 1.5     | 0.0005 | 0.0023 IZUMO4         | IZUMO family member 4                                     | Multiple_Complex |
| TC0100009572.hg.1    | 10.16 | 11.93 | -3.42   | 0.0005 | 0.0023 FAM46C         | family with sequence similarity 46, member C              | Coding           |

|                      |       |       |       |        |                                                                |                  |
|----------------------|-------|-------|-------|--------|----------------------------------------------------------------|------------------|
| TC1600009088.hg.1    | 6.03  | 6.53  | -1.41 | 0.0005 | 0.0023 PKD1; MIR1 polycystic kidney disease 1 (autosomal domin | Multiple_Complex |
| TC0800010696.hg.1    | 4.37  | 3.81  | 1.48  | 0.0005 | 0.0023 TCF24 transcription factor 24                           | Multiple_Complex |
| TC0500011712.hg.1    | 5.39  | 6.43  | -2.05 | 0.0005 | 0.0023 EPB41L4A erythrocyte membrane protein band 4.1 like 4   | Multiple_Complex |
| TC0100017374.hg.1    | 8.67  | 9.11  | -1.36 | 0.0005 | 0.0023 RAB3GAP2; RAB3 GTPase activating protein subunit 2 (nor | Multiple_Complex |
| TC1600011565.hg.1    | 5.8   | 5.24  | 1.48  | 0.0005 | 0.0023 CFDP1 craniofacial development protein 1                | Multiple_Complex |
| TC1900011814.hg.1    | 5.62  | 6.4   | -1.72 | 0.0005 | 0.0023 ZNF17 zinc finger protein 17                            | Multiple_Complex |
| TC1200011567.hg.1    | 10.25 | 9.26  | 1.98  | 0.0005 | 0.0023 TMCC3; MI transmembrane and coiled-coil domain family   | Multiple_Complex |
| TC0200008468.hg.1    | 4.74  | 5.61  | -1.83 | 0.0005 | 0.0023 FAHD2A fumarylacetoacetate hydrolase domain contai      | Multiple_Complex |
| TC1400010156.hg.1    | 4.96  | 5.37  | -1.33 | 0.0005 | 0.0023 BCL11B B-cell CLL/lymphoma 11B (zinc finger protein)    | Multiple_Complex |
| TC1200007866.hg.1    | 9.16  | 9.79  | -1.55 | 0.0005 | 0.0023 SHMT2 serine hydroxymethyltransferase 2 (mitochon       | Multiple_Complex |
| TC0700011973.hg.1    | 7.01  | 7.65  | -1.56 | 0.0005 | 0.0023 TAF6 TAF6 RNA polymerase II, TATA box binding pr        | Multiple_Complex |
| TC2200008641.hg.1    | 13.84 | 15.32 | -2.79 | 0.0005 | 0.0023 RAC2 ras-related C3 botulinum toxin substrate 2 (rh     | Multiple_Complex |
| TC0300012900.hg.1    | 7.62  | 6.97  | 1.57  | 0.0005 | 0.0024 TIPARP Memczak2013 ANTISENSE, CDS, coding, INTEF        | NonCoding        |
| TC1000010651.hg.1    | 5.32  | 6.07  | -1.68 | 0.0005 | 0.0024 CSTF2T cleavage stimulation factor, 3 pre-RNA, subun    | Coding           |
| TC0800011172.hg.1    | 5.78  | 6.73  | -1.93 | 0.0005 | 0.0024 MTERF3 mitochondrial transcription termination facto    | Multiple_Complex |
| TC1100007363.hg.1    | 6.88  | 7.57  | -1.61 | 0.0005 | 0.0024 API5 apoptosis inhibitor 5                              | Multiple_Complex |
| TC1900011822.hg.1    | 6.85  | 6.47  | 1.3   | 0.0005 | 0.0024 ZNF586 zinc finger protein 586                          | Multiple_Complex |
| TC0700012609.hg.1    | 4.65  | 4.07  | 1.5   | 0.0005 | 0.0024 KLF14 Kruppel-like factor 14                            | Coding           |
| TC1600011438.hg.1    | 6.26  | 6.99  | -1.66 | 0.0005 | 0.0024 MLYCD malonyl-CoA decarboxylase                         | Multiple_Complex |
| TC1100010976.hg.1    | 8.09  | 7.5   | 1.5   | 0.0005 | 0.0024 OSBP oxysterol binding protein                          | Multiple_Complex |
| TC2200008134.hg.1    | 5.06  | 5.84  | -1.72 | 0.0005 | 0.0024 ZNF280B zinc finger protein 280B                        | Multiple_Complex |
| TC2000007343.hg.1    | 5.43  | 6.23  | -1.75 | 0.0005 | 0.0024 DHX35 DEAH (Asp-Glu-Ala-His) box polypeptide 35         | Multiple_Complex |
| TC0X00010670.hg.1    | 4.57  | 5.93  | -2.56 | 0.0005 | 0.0024 TMEM255 transmembrane protein 255A                      | Multiple_Complex |
| TC0800011669.hg.1    | 9.97  | 10.59 | -1.54 | 0.0005 | 0.0024 DERL1 derlin 1                                          | Multiple_Complex |
| TC0200011745.hg.1    | 9.27  | 8.35  | 1.89  | 0.0005 | 0.0024 ROCK2 Rho-associated, coiled-coil containing protein    | Multiple_Complex |
| TC0500010081.hg.1    | 4.7   | 5.64  | -1.92 | 0.0005 | 0.0024 FAM173B Transcript Identified by AceView, Entrez Gene   | Unassigned       |
| TC0300012773.hg.1    | 4.73  | 4.25  | 1.39  | 0.0005 | 0.0024 TM4SF1 transmembrane 4 L six family member 1            | Multiple_Complex |
| TC0400007120.hg.1    | 10.28 | 9.21  | 2.11  | 0.0005 | 0.0024 RBPJ recombination signal binding protein for immu      | Multiple_Complex |
| TC1200012599.hg.1    | 9.41  | 10.21 | -1.74 | 0.0005 | 0.0024 AEBP2 AE binding protein 2                              | Multiple_Complex |
| TC0X00008235.hg.1    | 6.51  | 5.82  | 1.61  | 0.0005 | 0.0024 LONRF3 LON peptidase N-terminal domain and ring fin     | Multiple_Complex |
| TC0700009079.hg.1    | 7.73  | 6.84  | 1.86  | 0.0005 | 0.0024 TSPAN33 tetraspanin 33                                  | Multiple_Complex |
| TC1900009841.hg.1    | 4.84  | 4.05  | 1.73  | 0.0005 | 0.0024 OR7A5 olfactory receptor, family 7, subfamily A, merr   | Multiple_Complex |
| TC0600011438.hg.1    | 10.54 | 11.34 | -1.75 | 0.0005 | 0.0024 LTB lymphotoxin beta (TNF superfamily, member           | Multiple_Complex |
| TC1900010961.hg.1    | 4.84  | 5.44  | -1.52 | 0.0005 | 0.0024 IRF2BP1 interferon regulatory factor 2 binding protein  | Coding           |
| TC1600010174.hg.1    | 5.96  | 5.31  | 1.56  | 0.0005 | 0.0024 MYLK3 myosin light chain kinase 3                       | Multiple_Complex |
| TC1600011535.hg.1    | 8.97  | 7.92  | 2.07  | 0.0005 | 0.0024 SIAH1 siah E3 ubiquitin protein ligase 1                | Multiple_Complex |
| TC0700008707.hg.1    | 6.81  | 7.51  | -1.63 | 0.0005 | 0.0024 RINT1 RAD50 interactor 1                                | Multiple_Complex |
| TC0100006695.hg.1    | 5.27  | 4.56  | 1.63  | 0.0005 | 0.0024 TAS1R1 taste receptor, type 1, member 1                 | Coding           |
| TC0500012405.hg.1    | 4.7   | 4.16  | 1.45  | 0.0005 | 0.0024 HTR4 5-hydroxytryptamine (serotonin) receptor 4, (      | Multiple_Complex |
| TC2100007465.hg.1    | 7.95  | 6.53  | 2.68  | 0.0005 | 0.0024 PCNT pericentrin                                        | Multiple_Complex |
| TC1200012655.hg.1    | 9.22  | 10.11 | -1.85 | 0.0005 | 0.0025 HELB helicase (DNA) B                                   | Multiple_Complex |
| TC0500011554.hg.1    | 12.59 | 11.8  | 1.73  | 0.0005 | 0.0025 CHD1 chromodomain helicase DNA binding protein          | Multiple_Complex |
| TC0100012901.hg.1    | 6.27  | 7.05  | -1.72 | 0.0005 | 0.0025 KIAA2013 KIAA2013                                       | Multiple_Complex |
| TC1900007847.hg.1    | 10.09 | 9.24  | 1.81  | 0.0005 | 0.0025 USF2 upstream transcription factor 2, c-fos interacti   | Multiple_Complex |
| TC1700010653.hg.1    | 6.94  | 6.49  | 1.37  | 0.0005 | 0.0025 KRTAP2-3 keratin associated protein 2-3                 | Coding           |
| TC0300011223.hg.1    | 7.82  | 6.97  | 1.8   | 0.0005 | 0.0025 SELK selenoprotein K; selenoprotein K [Source:Entr      | Multiple_Complex |
| TC1100012853.hg.1    | 7.53  | 8.07  | -1.45 | 0.0005 | 0.0025 SNX19 sorting nexin 19                                  | Multiple_Complex |
| TC0800010298.hg.1    | 7.29  | 6.51  | 1.72  | 0.0005 | 0.0025 THAP1 THAP domain containing, apoptosis associater      | Multiple_Complex |
| TC0X00006891.hg.1    | 10.22 | 9.2   | 2.03  | 0.0005 | 0.0025 GK glycerol kinase                                      | Multiple_Complex |
| TC1600009322.hg.1    | 4.37  | 4.84  | -1.38 | 0.0005 | 0.0025 CARHSP1 calcium regulated heat stable protein 1         | Multiple_Complex |
| TC0900012179.hg.1    | 7.36  | 8.23  | -1.84 | 0.0005 | 0.0025 SPTAN1 spectrin, alpha, non-erythrocytic 1              | Multiple_Complex |
| TC1200009852.hg.1    | 4.75  | 5.51  | -1.69 | 0.0005 | 0.0025 PZP pregnancy-zone protein                              | Multiple_Complex |
| TC2000007243.hg.1    | 7.67  | 8.27  | -1.52 | 0.0005 | 0.0025 AAR2 AAR2 splicing factor homolog                       | Multiple_Complex |
| TC0600014249.hg.1    | 10.57 | 9.61  | 1.95  | 0.0005 | 0.0025 HIST1H2BC histone cluster 1, H2bc                       | Coding           |
| TC1700012054.hg.1    | 7.74  | 8.4   | -1.58 | 0.0005 | 0.0025 NPLOC4 NPL4 homolog, ubiquitin recognition factor       | Multiple_Complex |
| TC1200011320.hg.1    | 6.07  | 6.56  | -1.41 | 0.0005 | 0.0025 BBS10 Bardet-Biedl syndrome 10                          | Coding           |
| TC1600008149.hg.1    | 8.1   | 8.88  | -1.72 | 0.0005 | 0.0025 E2F4 E2F transcription factor 4, p107/p130-binding      | Multiple_Complex |
| TC1900009408.hg.1    | 8.34  | 8.94  | -1.52 | 0.0005 | 0.0025 RANBP3 RAN binding protein 3                            | Multiple_Complex |
| TC1200007521.hg.1    | 5.79  | 5.21  | 1.49  | 0.0005 | 0.0025 ANP32D acidic nuclear phosphoprotein 32 family mem      | Coding           |
| TSUnmapped00000198.h | 6.5   | 7.05  | -1.47 | 0.0005 | 0.0025 ZNF852 zinc finger protein 852                          | NonCoding        |
| TC1900010158.hg.1    | 9.84  | 10.73 | -1.85 | 0.0005 | 0.0025 ZNF100 zinc finger protein 100                          | Multiple_Complex |
| TC1700007787.hg.1    | 5.93  | 6.74  | -1.75 | 0.0005 | 0.0025 WIPF2 WAS/WASL interacting protein family, membe        | Multiple_Complex |
| TC1600007978.hg.1    | 4.3   | 3.88  | 1.33  | 0.0005 | 0.0025 SLC12A3 solute carrier family 12 (sodium/chloride tran  | Multiple_Complex |
| TC0200011040.hg.1    | 10.56 | 11.55 | -1.99 | 0.0006 | 0.0025 ITM2C integral membrane protein 2C                      | Multiple_Complex |
| TC0100018248.hg.1    | 9.01  | 9.9   | -1.85 | 0.0006 | 0.0025 RNPC3 RNA binding region (RNP1, RRM) containing 3       | Multiple_Complex |
| TC1600006893.hg.1    | 7.94  | 8.84  | -1.87 | 0.0006 | 0.0025 CLEC16A C-type lectin domain family 16, member A        | Multiple_Complex |
| TC0300006719.hg.1    | 6.19  | 6.63  | -1.36 | 0.0006 | 0.0026 BTD biotinidase                                         | Multiple_Complex |
| TC2200008856.hg.1    | 7.54  | 8.22  | -1.6  | 0.0006 | 0.0026 NAGA N-acetylgalactosaminidase, alpha-                  | Multiple_Complex |
| TC1200009847.hg.1    | 4.56  | 5.49  | -1.91 | 0.0006 | 0.0026 A2M alpha-2-macroglobulin                               | Multiple_Complex |
| TC0400009223.hg.1    | 3.98  | 3.4   | 1.5   | 0.0006 | 0.0026 CPE carboxypeptidase E                                  | Coding           |

|                      |       |       |       |        |                   |                                                     |                  |
|----------------------|-------|-------|-------|--------|-------------------|-----------------------------------------------------|------------------|
| TC1700010663.hg.1    | 4.37  | 3.58  | 1.73  | 0.0006 | 0.0026 KRTAP16-1  | keratin associated protein 16-1                     | Coding           |
| TC1800007805.hg.1    | 4.94  | 5.91  | -1.96 | 0.0006 | 0.0026 NFATC1     | nuclear factor of activated T-cells, cytoplasmic    | Multiple_Complex |
| TC1400007628.hg.1    | 11.69 | 10.69 | 2     | 0.0006 | 0.0026 PSEN1      | presenilin 1                                        | Multiple_Complex |
| TC0200016753.hg.1    | 4.93  | 5.65  | -1.65 | 0.0006 | 0.0026 CCDC141    | coiled-coil domain containing 141                   | Multiple_Complex |
| TC1500010857.hg.1    | 6.56  | 8.32  | -3.37 | 0.0006 | 0.0026 EPB42      | erythrocyte membrane protein band 4.2               | Multiple_Complex |
| TC0100015180.hg.1    | 8.57  | 7.67  | 1.86  | 0.0006 | 0.0026 WDR47      | WD repeat domain 47                                 | Multiple_Complex |
| TC0500007673.hg.1    | 7.58  | 8.4   | -1.77 | 0.0006 | 0.0026 RAD17      | RAD17 checkpoint clamp loader component             | Multiple_Complex |
| TC0900009944.hg.1    | 6.74  | 7.7   | -1.93 | 0.0006 | 0.0026 CD72       | CD72 molecule                                       | Multiple_Complex |
| TC0600010960.hg.1    | 9.02  | 7.89  | 2.19  | 0.0006 | 0.0026 TPMT       | thiopurine S-methyltransferase                      | Multiple_Complex |
| TC0200007077.hg.1    | 7.83  | 8.5   | -1.59 | 0.0006 | 0.0026 SLC4A1AP   | solute carrier family 4 (anion exchanger), men      | Multiple_Complex |
| TC1400010727.hg.1    | 5.43  | 6.49  | -2.09 | 0.0006 | 0.0026 RIPK3      | receptor-interacting serine-threonine kinase 3      | Multiple_Complex |
| TC1700009748.hg.1    | 8.61  | 9.12  | -1.43 | 0.0006 | 0.0026 SCO1       | SCO1 cytochrome c oxidase assembly protein          | Multiple_Complex |
| TC1900009346.hg.1    | 7.07  | 8.66  | -3    | 0.0006 | 0.0026 UBXN6      | UBX domain protein 6                                | Multiple_Complex |
| TC0200010607.hg.1    | 9.68  | 10.53 | -1.8  | 0.0006 | 0.0026 CREB1      | cAMP responsive element binding protein 1           | Multiple_Complex |
| TC0100011692.hg.1    | 9.18  | 10.06 | -1.84 | 0.0006 | 0.0026 MIA3       | melanoma inhibitory activity family, member         | Multiple_Complex |
| TC1300009898.hg.1    | 5.1   | 4.43  | 1.59  | 0.0006 | 0.0026 GRTP1      | growth hormone regulated TBC protein 1              | Multiple_Complex |
| TC0900010387.hg.1    | 7.38  | 6.62  | 1.7   | 0.0006 | 0.0026 TMEM2      | Transcript Identified by AceView, Entrez Gene       | Unassigned       |
| TC1700007105.hg.1    | 5.7   | 6.26  | -1.48 | 0.0006 | 0.0026 LLL1       | lethal giant larvae homolog 1 (Drosophila)          | Multiple_Complex |
| TC2000007717.hg.1    | 5.65  | 6.48  | -1.78 | 0.0006 | 0.0026 MOCS3      | molybdenum cofactor synthesis 3                     | Coding           |
| TC1800006915.hg.1    | 4.87  | 6.11  | -2.36 | 0.0006 | 0.0027 HRH4       | histamine receptor H4                               | Coding           |
| TC0100008321.hg.1    | 5.19  | 6.02  | -1.78 | 0.0006 | 0.0027 GPX7       | glutathione peroxidase 7                            | Multiple_Complex |
| TC0400008618.hg.1    | 4.71  | 4.16  | 1.46  | 0.0006 | 0.0027 FGF2       | fibroblast growth factor 2 (basic)                  | Multiple_Complex |
| TC1100007400.hg.1    | 6.84  | 7.69  | -1.8  | 0.0006 | 0.0027 TSPAN18    | tetraspanin 18                                      | Multiple_Complex |
| TC1900011537.hg.1    | 3.84  | 4.48  | -1.56 | 0.0006 | 0.0027 ZNF835     | Transcript Identified by AceView, Entrez Gene       | Coding           |
| TC1400008760.hg.1    | 7.74  | 8.17  | -1.34 | 0.0006 | 0.0027 SDR39U1    | short chain dehydrogenase/reductase family :        | Multiple_Complex |
| TC1600011424.hg.1    | 6.99  | 7.65  | -1.58 | 0.0006 | 0.0027 DDX19B     | DEAD (Asp-Glu-Ala-Asp) box polypeptide 19B          | Multiple_Complex |
| TC0200016224.hg.1    | 5.24  | 4.64  | 1.52  | 0.0006 | 0.0027 PER2       | period circadian clock 2                            | Multiple_Complex |
| TC1000011445.hg.1    | 7.09  | 7.89  | -1.74 | 0.0006 | 0.0027 MYOF       | myoferlin                                           | Multiple_Complex |
| TC0300009651.hg.1    | 10.05 | 9.47  | 1.5   | 0.0006 | 0.0027 ATP11B     | ATPase, class VI, type 11B                          | Multiple_Complex |
| TC0800012343.hg.1    | 6.18  | 5.69  | 1.41  | 0.0006 | 0.0027 ZFPM2      | zinc finger protein, FOG family member 2            | NonCoding        |
| TC0100017368.hg.1    | 6.71  | 7.4   | -1.61 | 0.0006 | 0.0027 BPNT1      | 3(2), 5-bisphosphate nucleotidase 1                 | Multiple_Complex |
| TC0700013611.hg.1    | 3.77  | 3.49  | 1.21  | 0.0006 | 0.0027 TFEC       | transcription factor EC                             | NonCoding        |
| TSUnmapped00000205.h | 9.2   | 10.02 | -1.76 | 0.0006 | 0.0027 SURF4      | surfeit 4                                           | Coding           |
| TC0400011579.hg.1    | 6.79  | 5.77  | 2.02  | 0.0006 | 0.0027 PLA2G12A   | phospholipase A2, group XIIA                        | Multiple_Complex |
| TC0900009513.hg.1    | 5.59  | 6.43  | -1.8  | 0.0006 | 0.0027 TMEM261    | transmembrane protein 261                           | Multiple_Complex |
| TC2200009364.hg.1    | 7.77  | 7.04  | 1.66  | 0.0006 | 0.0027 CPT1B      | carnitine palmitoyltransferase 1B (muscle)          | Multiple_Complex |
| TC1900009682.hg.1    | 6.4   | 7.39  | -1.98 | 0.0006 | 0.0027 ELOF1      | ELF1 homolog, elongation factor 1                   | Multiple_Complex |
| TC0X00010640.hg.1    | 7.37  | 6.86  | 1.43  | 0.0006 | 0.0027 CXorf56    | chromosome X open reading frame 56                  | Multiple_Complex |
| TC0700008501.hg.1    | 5.87  | 6.64  | -1.7  | 0.0006 | 0.0027 ZSCAN25    | zinc finger and SCAN domain containing 25           | Multiple_Complex |
| TC0400010609.hg.1    | 5.58  | 4.95  | 1.54  | 0.0006 | 0.0027 CORIN      | corin, serine peptidase                             | Multiple_Complex |
| TC1100012610.hg.1    | 5.87  | 4.88  | 1.99  | 0.0006 | 0.0027 BSX        | brain-specific homeobox                             | Multiple_Complex |
| TC0400011130.hg.1    | 7.12  | 7.7   | -1.5  | 0.0006 | 0.0027 PAQR3      | progesterin and adipoQ receptor family membe        | Multiple_Complex |
| TC0500007154.hg.1    | 7     | 6.22  | 1.73  | 0.0006 | 0.0027 SLC1A3     | solute carrier family 1 (glial high affinity glutar | Multiple_Complex |
| TC0300012834.hg.1    | 5.43  | 6.53  | -2.14 | 0.0006 | 0.0028 TMEM14EF   | transmembrane protein 14E, pseudogene               | Coding           |
| TC0700008690.hg.1    | 12.62 | 12    | 1.54  | 0.0006 | 0.0028 KMT2E      | lysine (K)-specific methyltransferase 2E            | Multiple_Complex |
| TC1100009335.hg.1    | 5.08  | 5.81  | -1.66 | 0.0006 | 0.0028 C11orf63   | chromosome 11 open reading frame 63                 | Multiple_Complex |
| TC0300011324.hg.1    | 4.43  | 5.17  | -1.67 | 0.0006 | 0.0028 FHIT       | fragile histidine triad                             | Multiple_Complex |
| TC1200009749.hg.1    | 4.68  | 4.22  | 1.37  | 0.0006 | 0.0028 PIANP      | PILR alpha associated neural protein                | Coding           |
| TC1500010712.hg.1    | 7.92  | 9.2   | -2.43 | 0.0006 | 0.0028 GOLGA8N    | golgin A8 family, member N                          | Multiple_Complex |
| TC0900006953.hg.1    | 5.34  | 4.8   | 1.46  | 0.0006 | 0.0028 TMEM215    | transmembrane protein 215                           | Coding           |
| TC0300011044.hg.1    | 6.56  | 7.23  | -1.59 | 0.0006 | 0.0028 DALRD3     | DALR anticodon binding domain containing 3          | Multiple_Complex |
| TC0X00008492.hg.1    | 4.58  | 4.18  | 1.32  | 0.0006 | 0.0028 SMIM10     | small integral membrane protein 10                  | Multiple_Complex |
| TC0700013435.hg.1    | 5.15  | 5.73  | -1.5  | 0.0006 | 0.0028 CDHR3      | cadherin-related family member 3                    | NonCoding        |
| TC1200012100.hg.1    | 6.24  | 5.43  | 1.75  | 0.0006 | 0.0028 KSR2       | kinase suppressor of ras 2                          | Multiple_Complex |
| TC1100010156.hg.1    | 7.77  | 7.27  | 1.42  | 0.0006 | 0.0028 BTBD10     | BTB (POZ) domain containing 10                      | Multiple_Complex |
| TC2000007430.hg.1    | 11.08 | 10.29 | 1.73  | 0.0006 | 0.0028 SRSF6      | serine/arginine-rich splicing factor 6              | Multiple_Complex |
| TC0500010766.hg.1    | 5.52  | 5.95  | -1.35 | 0.0006 | 0.0028 PLPP1; RNF | phospholipid phosphatase 1; ring finger prote       | Multiple_Complex |
| TC1300007167.hg.1    | 11.06 | 12.1  | -2.05 | 0.0006 | 0.0028 PHF11      | PHD finger protein 11                               | Multiple_Complex |
| TC0900012215.hg.1    | 4.7   | 3.94  | 1.69  | 0.0006 | 0.0028 IFNA16     | interferon, alpha 16                                | Coding           |
| TC2100008465.hg.1    | 6.42  | 7.08  | -1.58 | 0.0006 | 0.0028 MCM3AP     | minichromosome maintenance complex comp             | Multiple_Complex |
| TC0100018387.hg.1    | 9.43  | 8.41  | 2.04  | 0.0006 | 0.0028 CDK11B     | cyclin-dependent kinase 11B                         | Multiple_Complex |
| TC0500009175.hg.1    | 9.86  | 10.88 | -2.02 | 0.0006 | 0.0028 LARP1      | La ribonucleoprotein domain family, member          | Multiple_Complex |
| TC0100016035.hg.1    | 9.65  | 8.95  | 1.63  | 0.0006 | 0.0028 ETV3       | ets variant 3                                       | Multiple_Complex |
| TC1900010543.hg.1    | 4.09  | 4.61  | -1.43 | 0.0006 | 0.0028 ZNF829     | zinc finger protein 829                             | Multiple_Complex |
| TC1000012491.hg.1    | 7.55  | 6.74  | 1.75  | 0.0006 | 0.0028 ENTPD7     | ectonucleoside triphosphate diphosphohydroly        | Multiple_Complex |
| TC0200011624.hg.1    | 7.76  | 11.65 | -14.8 | 0.0006 | 0.0028 CMPK2      | cytidine monophosphate (UMP-CMP) kinase 2           | Multiple_Complex |
| TC0500013175.hg.1    | 6.61  | 7.29  | -1.6  | 0.0006 | 0.0028 IPO11; LRR | importin 11; leucine rich repeat containing 70      | Multiple_Complex |
| TC0600008760.hg.1    | 7.13  | 7.68  | -1.46 | 0.0006 | 0.0028 PM20D2     | peptidase M20 domain containing 2                   | Multiple_Complex |
| TC2000009218.hg.1    | 4.88  | 4.22  | 1.58  | 0.0006 | 0.0028 SDC4       | syndecan 4                                          | Multiple_Complex |
| TC0100007378.hg.1    | 8.31  | 7.38  | 1.91  | 0.0006 | 0.0028 CLIC4      | chloride intracellular channel 4                    | Multiple_Complex |



|                      |       |       |       |        |                   |                                                   |                  |
|----------------------|-------|-------|-------|--------|-------------------|---------------------------------------------------|------------------|
| TC0X00009218.hg.1    | 10.7  | 9.88  | 1.76  | 0.0006 | 0.0028 RPS6KA3    | ribosomal protein S6 kinase, 90kDa, polypepti     | Multiple_Complex |
| TC2000009947.hg.1    | 8.63  | 7.89  | 1.67  | 0.0006 | 0.0028 STX16-NPE  | STX16-NPEPL1 readthrough (NMD candidate)          | Multiple_Complex |
| TC0400009038.hg.1    | 11.01 | 11.71 | -1.62 | 0.0006 | 0.0028 KIAA0922   | KIAA0922                                          | Multiple_Complex |
| TC1100009463.hg.1    | 5.73  | 5.26  | 1.39  | 0.0006 | 0.0028 KIRREL3-AS | KIRREL3 antisense RNA 3                           | Multiple_Complex |
| TC0400010260.hg.1    | 6.47  | 7.31  | -1.79 | 0.0006 | 0.0028 SEPSECS    | Sep (O-phosphoserine) tRNA:Sec (selenocyste       | Multiple_Complex |
| TC1600010307.hg.1    | 4.82  | 4.08  | 1.67  | 0.0006 | 0.0028 C16orf97   | chromosome 16 open reading frame 97               | Multiple_Complex |
| TC1900009310.hg.1    | 5.14  | 5.98  | -1.8  | 0.0006 | 0.0028 MATK       | megakaryocyte-associated tyrosine kinase          | Multiple_Complex |
| TC1200012808.hg.1    | 8.72  | 9.39  | -1.59 | 0.0006 | 0.0028 R3HDM2     | R3H domain containing 2                           | Multiple_Complex |
| TC1400007265.hg.1    | 8.71  | 9.43  | -1.64 | 0.0006 | 0.0028 TMEM260    | transmembrane protein 260                         | Multiple_Complex |
| TC1600011582.hg.1    | 4.19  | 4.7   | -1.42 | 0.0006 | 0.0028 KLHDC4     | kelch domain containing 4                         | Multiple_Complex |
| TC0600014055.hg.1    | 9.67  | 7.98  | 3.24  | 0.0006 | 0.0028 NQO2       | NAD(P)H dehydrogenase, quinone 2                  | Multiple_Complex |
| TC0700013388.hg.1    | 9.88  | 10.36 | -1.39 | 0.0006 | 0.0029 STAG3L1    | stromal antigen 3-like 1 (pseudogene)             | Multiple_Complex |
| TC0400012583.hg.1    | 7.29  | 6.92  | 1.29  | 0.0006 | 0.0029 RWDD4      | RWD domain containing 4                           | Multiple_Complex |
| TSUnmapped00000763.h | 6.67  | 7.21  | -1.46 | 0.0006 | 0.0029 SLC16A1    | solute carrier family 16 (monocarboxylate tran    | Coding           |
| TC0100013897.hg.1    | 6.52  | 7.03  | -1.42 | 0.0006 | 0.0029 P3H1       | prolyl 3-hydroxylase 1                            | Multiple_Complex |
| TC0200008447.hg.1    | 5.77  | 5.36  | 1.33  | 0.0006 | 0.0029 TEK4       | tektin 4                                          | Multiple_Complex |
| TC1700006480.hg.1    | 7.32  | 7.87  | -1.47 | 0.0006 | 0.0029 TIMM22     | translocase of inner mitochondrial membrane       | Multiple_Complex |
| TC0600013273.hg.1    | 10.63 | 9.73  | 1.87  | 0.0006 | 0.0029 BCLAF1     | Memczak2013 ALT_DONOR, coding, INTERNA            | NonCoding        |
| TC0X00010052.hg.1    | 5.02  | 4.36  | 1.58  | 0.0006 | 0.0029 NAP1L2     | Transcript Identified by AceView, Entrez Gene     | Unassigned       |
| TC0800006624.hg.1    | 4.43  | 3.89  | 1.46  | 0.0006 | 0.0029 DEF84A     | defensin, beta 4A                                 | Coding           |
| TC1500010463.hg.1    | 5.69  | 5.07  | 1.54  | 0.0006 | 0.0029 PRC1       | protein regulator of cytokinesis 1                | Multiple_Complex |
| TC1800007101.hg.1    | 5.44  | 6.11  | -1.59 | 0.0006 | 0.0029 KIAA1328   | KIAA1328                                          | Multiple_Complex |
| TC0300014050.hg.1    | 6.52  | 7.28  | -1.7  | 0.0006 | 0.0029 NPHP3      | nephronophthisis 3 (adolescent)                   | Multiple_Complex |
| TC1700006665.hg.1    | 5.18  | 5.69  | -1.42 | 0.0006 | 0.0029 ZFP3       | ZFP3 zinc finger protein                          | Coding           |
| TC0100018359.hg.1    | 9.48  | 8.57  | 1.88  | 0.0006 | 0.0029 TSNAX      | translin-associated factor X                      | Multiple_Complex |
| TC0200012076.hg.1    | 8.2   | 9.13  | -1.91 | 0.0006 | 0.0029 PPM1G      | protein phosphatase, Mg2+/Mn2+ dependent          | Multiple_Complex |
| TC1100006674.hg.1    | 4.39  | 3.66  | 1.66  | 0.0006 | 0.0029 OR51T1     | olfactory receptor, family 51, subfamily T, mei   | Coding           |
| TC0800012323.hg.1    | 6.92  | 6     | 1.89  | 0.0006 | 0.0029 CA13       | carbonic anhydrase XIII                           | Multiple_Complex |
| TC0700008495.hg.1    | 6.37  | 5.27  | 2.15  | 0.0007 | 0.0029 BUD31      | Transcript Identified by AceView, Entrez Gene     | Unassigned       |
| TC0700009872.hg.1    | 6.01  | 6.85  | -1.79 | 0.0007 | 0.0029 UBE3C      | ubiquitin protein ligase E3C                      | Multiple_Complex |
| TC1500010049.hg.1    | 3.67  | 4.35  | -1.6  | 0.0007 | 0.0029 FAM219B    | family with sequence similarity 219, member       | Multiple_Complex |
| TC1000011579.hg.1    | 5.87  | 6.79  | -1.89 | 0.0007 | 0.0029 HPS1; MIR4 | Hermansky-Pudlak syndrome 1; microRNA 46i         | Multiple_Complex |
| TC1200012713.hg.1    | 7.4   | 6.72  | 1.61  | 0.0007 | 0.0029 MAP1LC3B   | microtubule-associated protein 1 light chain 3    | Coding           |
| TC1600006448.hg.1    | 4.89  | 5.64  | -1.69 | 0.0007 | 0.003 HBQ1        | hemoglobin, theta 1                               | Coding           |
| TC1000009863.hg.1    | 10.5  | 9.61  | 1.85  | 0.0007 | 0.003 FAM107B     | family with sequence similarity 107, member       | Multiple_Complex |
| TC0600008066.hg.1    | 7.61  | 8.32  | -1.63 | 0.0007 | 0.003 KLHDC3      | kelch domain containing 3                         | Multiple_Complex |
| TC0100017029.hg.1    | 4.98  | 5.87  | -1.85 | 0.0007 | 0.003 PIK3C2B     | phosphatidylinositol-4-phosphate 3-kinase, ca     | Multiple_Complex |
| TC0100016053.hg.1    | 5.19  | 4.51  | 1.61  | 0.0007 | 0.003 CD5L        | CD5 molecule-like                                 | Multiple_Complex |
| TC0300012145.hg.1    | 5.7   | 4.99  | 1.64  | 0.0007 | 0.003 FSTL1; MIR  | follistatin like 1; microRNA 198                  | Multiple_Complex |
| TC1200012068.hg.1    | 5.96  | 6.48  | -1.44 | 0.0007 | 0.003 C12orf49    | chromosome 12 open reading frame 49               | Multiple_Complex |
| TC0200010837.hg.1    | 7.96  | 8.56  | -1.51 | 0.0007 | 0.003 ANKZF1      | ankyrin repeat and zinc finger domain contain     | Multiple_Complex |
| TC1200011996.hg.1    | 3.49  | 3.99  | -1.41 | 0.0007 | 0.003 LHX5        | LIM homeobox 5                                    | Multiple_Complex |
| TC2200007614.hg.1    | 7.12  | 7.99  | -1.83 | 0.0007 | 0.003 FAM118A     | family with sequence similarity 118, member       | Multiple_Complex |
| TC0X00007733.hg.1    | 4.39  | 3.71  | 1.59  | 0.0007 | 0.003 FAM46D      | family with sequence similarity 46, member D      | Coding           |
| TC0900009339.hg.1    | 7.19  | 7.91  | -1.65 | 0.0007 | 0.003 WASH1       | WAS protein family homolog 1                      | Multiple_Complex |
| TC1600009066.hg.1    | 7.51  | 8.61  | -2.15 | 0.0007 | 0.003 HAGH        | hydroxyacylglutathione hydrolase                  | Multiple_Complex |
| TC1200012766.hg.1    | 4.89  | 4.54  | 1.28  | 0.0007 | 0.003 PRB1        | proline-rich protein BstNI subfamily 1            | Coding           |
| TC0900008150.hg.1    | 7.34  | 8.59  | -2.38 | 0.0007 | 0.003 TMOD1       | tropomodulin 1                                    | Multiple_Complex |
| TC0X00006809.hg.1    | 9.99  | 9.18  | 1.76  | 0.0007 | 0.003 ZFX         | zinc finger protein, X-linked                     | Multiple_Complex |
| TC2200006862.hg.1    | 7.74  | 8.42  | -1.6  | 0.0007 | 0.003 SMARCB1     | SWI/SNF related, matrix associated, actin dep     | Multiple_Complex |
| TC1000012565.hg.1    | 6.01  | 6.74  | -1.66 | 0.0007 | 0.0031 DNAJC9     | DnaJ (Hsp40) homolog, subfamily C, member         | NonCoding        |
| TC1700006574.hg.1    | 5.22  | 4.7   | 1.43  | 0.0007 | 0.0031 OR1D4      | olfactory receptor, family 1, subfamily D, men    | Multiple_Complex |
| TC1100011182.hg.1    | 5.67  | 4.79  | 1.84  | 0.0007 | 0.0031 PYGM       | phosphorylase, glycogen, muscle                   | Multiple_Complex |
| TC1400007155.hg.1    | 9.66  | 8.59  | 2.11  | 0.0007 | 0.0031 C14orf166  | chromosome 14 open reading frame 166              | Multiple_Complex |
| TC0700010035.hg.1    | 6.09  | 6.65  | -1.48 | 0.0007 | 0.0031 MAD1L1     | MAD1 mitotic arrest deficient-like 1 (yeast)      | Multiple_Complex |
| TC0100007954.hg.1    | 16.55 | 15.4  | 2.22  | 0.0007 | 0.0031 SMAP2      | small ArfGAP2                                     | Multiple_Complex |
| TC2100007355.hg.1    | 7.54  | 8.17  | -1.55 | 0.0007 | 0.0031 PFKL       | phosphofructokinase, liver                        | Multiple_Complex |
| TC0600008183.hg.1    | 8     | 8.8   | -1.74 | 0.0007 | 0.0031 CD2AP      | CD2-associated protein                            | Multiple_Complex |
| TC0400008427.hg.1    | 5.9   | 6.41  | -1.42 | 0.0007 | 0.0031 AP1AR      | adaptor-related protein complex 1 associated      | Multiple_Complex |
| TC0200012022.hg.1    | 6.44  | 5.64  | 1.75  | 0.0007 | 0.0031 KIF3C      | kinesin family member 3C                          | Multiple_Complex |
| TC1100011090.hg.1    | 6.54  | 7.03  | -1.4  | 0.0007 | 0.0031 EML3       | echinoderm microtubule associated protein lil     | Multiple_Complex |
| TSUnmapped00000528.h | 4.32  | 3.89  | 1.34  | 0.0007 | 0.0031 HNRNPCL1   | heterogeneous nuclear ribonucleoprotein C-iii     | Coding           |
| TC2000007627.hg.1    | 8.22  | 9.02  | -1.75 | 0.0007 | 0.0031 CSE1L      | CSE1 chromosome segregation 1-like (yeast)        | Multiple_Complex |
| TC1700007779.hg.1    | 12.21 | 11.02 | 2.29  | 0.0007 | 0.0031 MSL1       | male-specific lethal 1 homolog (Drosophila)       | Multiple_Complex |
| TC1600007741.hg.1    | 5.23  | 6.15  | -1.88 | 0.0007 | 0.0031 PHKB       | Transcript Identified by AceView, Entrez Gene     | Unassigned       |
| TC1900008399.hg.1    | 8.4   | 9.2   | -1.74 | 0.0007 | 0.0031 ARHGAP35   | Rho GTPase activating protein 35                  | Multiple_Complex |
| TC0100010525.hg.1    | 10.49 | 11.06 | -1.49 | 0.0007 | 0.0031 SFT2D2     | SFT2 domain containing 2                          | Multiple_Complex |
| TC1200010109.hg.1    | 10.37 | 8.31  | 4.17  | 0.0007 | 0.0031 LDHB       | lactate dehydrogenase B                           | Multiple_Complex |
| TC1700006735.hg.1    | 5.49  | 5.09  | 1.32  | 0.0007 | 0.0031 SLC2A4     | solute carrier family 2 (facilitated glucose tran | Coding           |
| TC1500009216.hg.1    | 4.06  | 3.56  | 1.41  | 0.0007 | 0.0031 TGM7       | transglutaminase 7                                | Multiple_Complex |

|                      |       |       |       |        |        |           |                                                   |                  |
|----------------------|-------|-------|-------|--------|--------|-----------|---------------------------------------------------|------------------|
| TC0900007010.hg.1    | 12.05 | 11.01 | 2.07  | 0.0007 | 0.0032 | UBE2R2    | ubiquitin-conjugating enzyme E2R 2                | Multiple_Complex |
| TC0100018514.hg.1    | 4.95  | 4.51  | 1.36  | 0.0007 | 0.0032 | VSIG8     | V-set and immunoglobulin domain containing        | Coding           |
| TC1900008696.hg.1    | 6.54  | 7.25  | -1.64 | 0.0007 | 0.0032 | ZNF880    | zinc finger protein 880                           | Multiple_Complex |
| TC0300009706.hg.1    | 5.15  | 5.93  | -1.72 | 0.0007 | 0.0032 | POLR2H    | polymerase (RNA) II (DNA directed) polypeptid     | Multiple_Complex |
| TC1700007904.hg.1    | 8.17  | 8.83  | -1.58 | 0.0007 | 0.0032 | TUBG1     | tubulin, gamma 1                                  | Multiple_Complex |
| TC2200007085.hg.1    | 8.17  | 8.56  | -1.31 | 0.0007 | 0.0032 | RNF185    | ring finger protein 185                           | Multiple_Complex |
| TC0200006833.hg.1    | 5.1   | 5.93  | -1.78 | 0.0007 | 0.0032 | GEN1      | GEN1 Holliday junction 5 flap endonuclease        | Multiple_Complex |
| TC0200012299.hg.1    | 5.83  | 6.5   | -1.59 | 0.0007 | 0.0032 | DHX57     | DEAH (Asp-Glu-Ala-Asp/His) box polypeptide        | Multiple_Complex |
| TC1100008800.hg.1    | 5.21  | 4.69  | 1.43  | 0.0007 | 0.0032 | IZUMO1R   | IZUMO1 receptor, JUNO                             | Coding           |
| TC1000008769.hg.1    | 5.69  | 6.36  | -1.59 | 0.0007 | 0.0032 | TAF5      | TAF5 RNA polymerase II, TATA box binding pr       | Multiple_Complex |
| TC1400007942.hg.1    | 6.87  | 7.46  | -1.5  | 0.0007 | 0.0032 | TDP1      | tyrosyl-DNA phosphodiesterase 1                   | Multiple_Complex |
| TC0X00007194.hg.1    | 8.45  | 8.97  | -1.43 | 0.0007 | 0.0032 | TBC1D25   | TBC1 domain family, member 25                     | Multiple_Complex |
| TC0800010630.hg.1    | 4.6   | 4.08  | 1.43  | 0.0007 | 0.0032 | GGH       | gamma-glutamyl hydrolase (conjugase, folylpr      | Multiple_Complex |
| TC1900011684.hg.1    | 6.86  | 7.63  | -1.7  | 0.0007 | 0.0032 | BABAM1    | BRISC and BRCA1 A complex member 1                | Multiple_Complex |
| TC0100009658.hg.1    | 9.36  | 10.13 | -1.69 | 0.0007 | 0.0032 | SRGAP2C   | SLIT-ROBO Rho GTPase activating protein 2C        | Multiple_Complex |
| TC0100015784.hg.1    | 5.76  | 7.73  | -3.91 | 0.0007 | 0.0032 | SELENBP1  | selenium binding protein 1                        | Multiple_Complex |
| TC1700009613.hg.1    | 7.42  | 6.03  | 2.62  | 0.0007 | 0.0032 | ASGR2     | asialoglycoprotein receptor 2                     | Multiple_Complex |
| TC1000006863.hg.1    | 6.1   | 6.88  | -1.71 | 0.0007 | 0.0032 | RPP38     | ribonuclease P/MRP 38kDa subunit                  | Multiple_Complex |
| TC0600011876.hg.1    | 11.54 | 12.67 | -2.2  | 0.0007 | 0.0032 | YIPF3     | Yip1 domain family member 3                       | Multiple_Complex |
| TC1100009817.hg.1    | 4.73  | 4.36  | 1.29  | 0.0007 | 0.0032 | PHLDA2    | pleckstrin homology-like domain, family A, me     | Multiple_Complex |
| TC1600009531.hg.1    | 7.84  | 7.33  | 1.42  | 0.0007 | 0.0032 | KIAA0430  | Transcript Identified by AceView, Entrez Gene     | Unassigned       |
| TC0500009183.hg.1    | 5.17  | 4.48  | 1.61  | 0.0007 | 0.0032 | MRPL22    | mitochondrial ribosomal protein L22               | Multiple_Complex |
| TC1700012446.hg.1    | 11.7  | 10.92 | 1.72  | 0.0007 | 0.0032 | CCDC47    | coiled-coil domain containing 47                  | Multiple_Complex |
| TC1800009221.hg.1    | 7.09  | 6.17  | 1.89  | 0.0007 | 0.0032 | RBBP8;    | Mlf retinoblastoma binding protein 8; microRNA 4  | Multiple_Complex |
| TC0600011134.hg.1    | 7.67  | 8.55  | -1.84 | 0.0007 | 0.0032 | HIST1H4D  | histone cluster 1, H4d                            | Coding           |
| TC1900007290.hg.1    | 5.64  | 5.02  | 1.54  | 0.0007 | 0.0032 | TMEM38A   | transmembrane protein 38A                         | Multiple_Complex |
| TC1600007191.hg.1    | 6.15  | 6.83  | -1.61 | 0.0007 | 0.0032 | EEF2K     | eukaryotic elongation factor 2 kinase             | Multiple_Complex |
| TC1200012654.hg.1    | 5.93  | 6.5   | -1.49 | 0.0007 | 0.0032 | TSMF      | Ts translation elongation factor, mitochondria    | Multiple_Complex |
| TC1900011389.hg.1    | 6.54  | 5.55  | 1.98  | 0.0007 | 0.0032 | VSTM1     | V-set and transmembrane domain containing         | Multiple_Complex |
| TC1500007833.hg.1    | 8.18  | 9.75  | -2.97 | 0.0007 | 0.0032 | PML       | promyelocytic leukemia                            | Multiple_Complex |
| TC0800011314.hg.1    | 8.33  | 7.49  | 1.8   | 0.0007 | 0.0032 | UBR5      | ubiquitin protein ligase E3 component n-reco      | Multiple_Complex |
| TC0200013517.hg.1    | 10.38 | 11.27 | -1.86 | 0.0007 | 0.0032 | SNRNP200  | small nuclear ribonucleoprotein, U5 200kDa s      | Multiple_Complex |
| TC1100009686.hg.1    | 6.22  | 5.67  | 1.46  | 0.0007 | 0.0032 | CDHR5     | cadherin-related family member 5                  | Multiple_Complex |
| TC0100015952.hg.1    | 7.65  | 8.54  | -1.85 | 0.0007 | 0.0032 | CLK2      | CDC like kinase 2                                 | Multiple_Complex |
| TC0300011403.hg.1    | 4.86  | 4.28  | 1.49  | 0.0007 | 0.0032 | MAGI1     | membrane associated guanylate kinase, WW          | Multiple_Complex |
| TC1500010738.hg.1    | 4.37  | 3.8   | 1.49  | 0.0007 | 0.0033 | CTXN2     | cortexin 2                                        | Coding           |
| TC0900011217.hg.1    | 15.05 | 15.79 | -1.67 | 0.0007 | 0.0033 | PTBP3     | polypyrimidine tract binding protein 3            | Multiple_Complex |
| TC0X00008533.hg.1    | 7.46  | 8.04  | -1.49 | 0.0007 | 0.0033 | HTATSF1   | HIV-1 Tat specific factor 1                       | Coding           |
| TC1900006640.hg.1    | 8.04  | 7.58  | 1.37  | 0.0007 | 0.0033 | FZR1      | fizzy/cell division cycle 20 related 1            | Multiple_Complex |
| TC0100017729.hg.1    | 8.24  | 7.62  | 1.54  | 0.0007 | 0.0033 | EXOC8     | exocyst complex component 8                       | Coding           |
| TC0700006813.hg.1    | 8.5   | 9     | -1.42 | 0.0007 | 0.0033 | HDAC9     | histone deacetylase 9                             | Multiple_Complex |
| TC1200010926.hg.1    | 11.66 | 11.06 | 1.51  | 0.0007 | 0.0033 | BAZZA     | bromodomain adjacent to zinc finger domain        | Multiple_Complex |
| TC0200010253.hg.1    | 5.97  | 6.78  | -1.75 | 0.0007 | 0.0033 | ANKAR     | ankyrin and armadillo repeat containing           | Multiple_Complex |
| TC1900007115.hg.1    | 5.7   | 6.25  | -1.46 | 0.0007 | 0.0033 | NFIX      | nuclear factor I/X (CCAAT-binding transcrip       | Multiple_Complex |
| TC0200016647.hg.1    | 8.77  | 7.93  | 1.79  | 0.0007 | 0.0033 | DPY30     | dpy-30 histone methyltransferase complex re       | Multiple_Complex |
| TC0700008263.hg.1    | 7     | 6.32  | 1.6   | 0.0007 | 0.0033 | DBF4      | DBF4 zinc finger                                  | Multiple_Complex |
| TC1700010545.hg.1    | 6.5   | 7.19  | -1.62 | 0.0007 | 0.0033 | PIP4K2B   | phosphatidylinositol-5-phosphate 4-kinase, ty     | Multiple_Complex |
| TC0600012296.hg.1    | 18.67 | 17.48 | 2.29  | 0.0007 | 0.0033 | EEF1A1    | eukaryotic translation elongation factor 1 alp    | Multiple_Complex |
| TC1900007349.hg.1    | 16.83 | 17.82 | -1.99 | 0.0007 | 0.0033 | RPL18A;   | SN ribosomal protein L18a; small nucleolar RNA, I | Multiple_Complex |
| TC1900008498.hg.1    | 10.8  | 10    | 1.75  | 0.0008 | 0.0033 | NUCB1     | nucleobindin 1                                    | Multiple_Complex |
| TC0600007868.hg.1    | 5.64  | 6.34  | -1.62 | 0.0008 | 0.0033 | RNF8      | ring finger protein 8, E3 ubiquitin protein ligas | Multiple_Complex |
| TC1700007344.hg.1    | 8.19  | 8.9   | -1.64 | 0.0008 | 0.0033 | NLK       | nemo-like kinase                                  | Multiple_Complex |
| TC0100008341.hg.1    | 4.64  | 5.22  | -1.5  | 0.0008 | 0.0033 | PODN      | podocan                                           | Multiple_Complex |
| TSUnmapped00000053.h | 7.32  | 6.68  | 1.57  | 0.0008 | 0.0033 | RPL7A     | ribosomal protein L7a                             | NonCoding        |
| TC1900011852.hg.1    | 6.42  | 5.45  | 1.96  | 0.0008 | 0.0033 | RFX2      | regulatory factor X, 2 (influences HLA class II   | Multiple_Complex |
| TC1200009247.hg.1    | 12.42 | 11.66 | 1.7   | 0.0008 | 0.0034 | TMED2     | transmembrane p24 trafficking protein 2           | Multiple_Complex |
| TC0X00007200.hg.1    | 8.27  | 8.74  | -1.39 | 0.0008 | 0.0034 | SUV39H1   | suppressor of variegation 3-9 homolog 1 (Dro      | Multiple_Complex |
| TC1400009337.hg.1    | 11.22 | 10.29 | 1.91  | 0.0008 | 0.0034 | DHRS7     | dehydrogenase/reductase (SDR family) memb         | Multiple_Complex |
| TC1900011282.hg.1    | 4.36  | 5.06  | -1.62 | 0.0008 | 0.0034 | ZNF614    | zinc finger protein 614                           | Multiple_Complex |
| TC1500008900.hg.1    | 5.02  | 5.68  | -1.58 | 0.0008 | 0.0034 | LOC28371C | uncharacterized LOC283710; novel transcript;      | Multiple_Complex |
| TC1200008739.hg.1    | 6.64  | 7.42  | -1.73 | 0.0008 | 0.0034 | TMEM263   | transmembrane protein 263                         | Multiple_Complex |
| TC1200012775.hg.1    | 3.87  | 4.56  | -1.62 | 0.0008 | 0.0034 | ST8SIA1   | ST8 alpha-N-acetyl-neuraminide alpha-2,8-sial     | Multiple_Complex |
| TSUnmapped00000377.h | 9.71  | 10.34 | -1.55 | 0.0008 | 0.0034 | INPP5D    | inositol polyphosphate-5-phosphatase D            | NonCoding        |
| TC0900011835.hg.1    | 8.44  | 7.75  | 1.61  | 0.0008 | 0.0034 | OBP2B     | odorant binding protein 2B                        | Multiple_Complex |
| TC1900008031.hg.1    | 7.08  | 6.57  | 1.43  | 0.0008 | 0.0034 | LGALS7B   | lectin, galactoside-binding, soluble, 7B          | Multiple_Complex |
| TC0200016673.hg.1    | 9.7   | 9.08  | 1.53  | 0.0008 | 0.0034 | RTN4      | reticulon 4                                       | Multiple_Complex |
| TC0300014092.hg.1    | 5.35  | 6.02  | -1.59 | 0.0008 | 0.0034 | TM4SF19-T | TM4SF19-TCTEX1D2 readthrough (NMD candi           | Multiple_Complex |
| TC1900009630.hg.1    | 5.57  | 6.27  | -1.63 | 0.0008 | 0.0034 | KEAP1     | kelch-like ECH-associated protein 1               | Multiple_Complex |
| TC0X00009803.hg.1    | 4.63  | 4.06  | 1.48  | 0.0008 | 0.0034 | MTRNR2L1  | MT-RNR2-like 10                                   | Coding           |
| TC1500010883.hg.1    | 7.08  | 7.9   | -1.76 | 0.0008 | 0.0034 | SNAPC5    | small nuclear RNA activating complex polypep      | Coding           |

|                      |       |       |       |        |        |           |                                                  |                  |
|----------------------|-------|-------|-------|--------|--------|-----------|--------------------------------------------------|------------------|
| TC0100018443.hg.1    | 5.61  | 4.98  | 1.56  | 0.0008 | 0.0034 | PLPP3     | phospholipid phosphatase 3                       | Multiple_Complex |
| TC1900008300.hg.1    | 8.08  | 7.26  | 1.76  | 0.0008 | 0.0034 | RELB      | v-rel avian reticuloendotheliosis viral oncogen  | Multiple_Complex |
| TC0X00006758.hg.1    | 7.04  | 7.74  | -1.63 | 0.0008 | 0.0034 | CNKSR2    | connector enhancer of kinase suppressor of R     | Multiple_Complex |
| TC1900007859.hg.1    | 11.44 | 10.28 | 2.25  | 0.0008 | 0.0034 | FFAR2     | free fatty acid receptor 2                       | Multiple_Complex |
| TC0600013539.hg.1    | 6.5   | 5.6   | 1.86  | 0.0008 | 0.0034 | RAET1L    | retinoic acid early transcript 1L                | Coding           |
| TC0500012588.hg.1    | 5.28  | 6.24  | -1.94 | 0.0008 | 0.0034 | HAVCR1    | hepatitis A virus cellular receptor 1            | Multiple_Complex |
| TC0Y00006858.hg.1    | 9.24  | 8.5   | 1.68  | 0.0008 | 0.0034 | VAMP7     | Homo sapiens vesicle-associated membrane p       | Multiple_Complex |
| TC0200011980.hg.1    | 11.85 | 12.3  | -1.37 | 0.0008 | 0.0034 | ITSN2     | intersectin 2                                    | Multiple_Complex |
| TC0900007740.hg.1    | 6.25  | 6.98  | -1.66 | 0.0008 | 0.0035 | RMI1      | RecQ mediated genome instability 1               | Coding           |
| TC0400007055.hg.1    | 8.21  | 7.31  | 1.87  | 0.0008 | 0.0035 | CDC42     | Transcript Identified by AceView, Entrez Gene    | Unassigned       |
| TC0400011407.hg.1    | 3.81  | 3.42  | 1.31  | 0.0008 | 0.0035 | ADH1A     | alcohol dehydrogenase 1A (class I), alpha poly   | Multiple_Complex |
| TC0200016562.hg.1    | 4.95  | 5.29  | -1.26 | 0.0008 | 0.0035 | PHOSPHO2  | phosphatase, orphan 2                            | Multiple_Complex |
| TC0800010524.hg.1    | 8.47  | 9.06  | -1.51 | 0.0008 | 0.0035 | IMPAD1    | inositol monophosphatase domain containing       | Multiple_Complex |
| TC0300013835.hg.1    | 5.74  | 6.28  | -1.45 | 0.0008 | 0.0035 | TEX264    | testis expressed 264                             | Multiple_Complex |
| TC1400009131.hg.1    | 9.31  | 10.22 | -1.88 | 0.0008 | 0.0035 | MAP4K5    | mitogen-activated protein kinase kinase kinas    | Multiple_Complex |
| TSUnmapped00000777.h | 7.17  | 8.04  | -1.83 | 0.0008 | 0.0035 | HYOU1     | hypoxia up-regulated 1                           | Coding           |
| TC0300008487.hg.1    | 4.58  | 3.94  | 1.56  | 0.0008 | 0.0035 | MAATS1    | MYCBP-associated, testis expressed 1             | Multiple_Complex |
| TC1600011493.hg.1    | 15.39 | 12.62 | 6.82  | 0.0008 | 0.0035 | RPS15A    | ribosomal protein S15a                           | Multiple_Complex |
| TC2200007906.hg.1    | 10.6  | 9.75  | 1.8   | 0.0008 | 0.0035 | BID       | BH3 interacting domain death agonist             | Multiple_Complex |
| TC0100018434.hg.1    | 8.32  | 7.51  | 1.74  | 0.0008 | 0.0035 | MYCBP; GJ | MYC binding protein; gap junction protein alp    | Multiple_Complex |
| TC0X00009153.hg.1    | 6.27  | 6.86  | -1.5  | 0.0008 | 0.0035 | CTPS2     | CTP synthase 2                                   | Multiple_Complex |
| TC0100012523.hg.1    | 8.07  | 8.82  | -1.69 | 0.0008 | 0.0035 | MORN1     | MORN repeat containing 1                         | Multiple_Complex |
| TC0200015242.hg.1    | 15.19 | 16.72 | -2.88 | 0.0008 | 0.0035 | STAT1     | signal transducer and activator of transcrip     | Multiple_Complex |
| TC1900011791.hg.1    | 5.54  | 6.26  | -1.65 | 0.0008 | 0.0035 | ZNF613    | zinc finger protein 613                          | Multiple_Complex |
| TC1200007810.hg.1    | 7.77  | 8.15  | -1.3  | 0.0008 | 0.0035 | ORMDL2    | ORMDL sphingolipid biosynthesis regulator 2      | Multiple_Complex |
| TC1200009964.hg.1    | 11.08 | 9.45  | 3.09  | 0.0008 | 0.0036 | MANSC1    | MANSC domain containing 1                        | Coding           |
| TC0600007789.hg.1    | 5.56  | 6.24  | -1.6  | 0.0008 | 0.0036 | ZNF76     | zinc finger protein 76                           | Multiple_Complex |
| TSUnmapped00000192.h | 6.84  | 7.6   | -1.69 | 0.0008 | 0.0036 | DGKD      | diacylglycerol kinase, delta 130kDa              | NonCoding        |
| TC0500011333.hg.1    | 12.12 | 11.31 | 1.76  | 0.0008 | 0.0036 | TMEM167A  | transmembrane protein 167A                       | Multiple_Complex |
| TC0200009370.hg.1    | 3.81  | 3.16  | 1.57  | 0.0008 | 0.0036 | ZNF806    | zinc finger protein 806                          | Multiple_Complex |
| TC0500008810.hg.1    | 13.43 | 12.07 | 2.57  | 0.0008 | 0.0036 | MATR3; SN | matrin 3; small nucleolar RNA, H/ACA box 74A     | Multiple_Complex |
| TC1500010255.hg.1    | 5.37  | 5.93  | -1.47 | 0.0008 | 0.0036 | C15orf40  | chromosome 15 open reading frame 40              | Multiple_Complex |
| TC0300006677.hg.1    | 14.56 | 13.81 | 1.67  | 0.0008 | 0.0036 | SLC6A6    | solute carrier family 6 (neurotransmitter trans  | Multiple_Complex |
| TC0900007844.hg.1    | 7.78  | 8.56  | -1.72 | 0.0008 | 0.0036 | SPIN1     | spindlin 1                                       | Multiple_Complex |
| TC1600010407.hg.1    | 9.51  | 10.13 | -1.54 | 0.0008 | 0.0036 | NUDT21    | nudix hydrolase 21                               | Multiple_Complex |
| TC1100011032.hg.1    | 7.47  | 8.21  | -1.67 | 0.0008 | 0.0036 | CYB561A3  | cytochrome b561 family, member A3                | Multiple_Complex |
| TC0100008697.hg.1    | 6.32  | 5.76  | 1.47  | 0.0008 | 0.0036 | CTH       | cystathionine gamma-lyase                        | Multiple_Complex |
| TC1900006852.hg.1    | 5.36  | 4.83  | 1.44  | 0.0008 | 0.0036 | RETN      | resistin                                         | Coding           |
| TC0700012190.hg.1    | 5.46  | 4.83  | 1.55  | 0.0008 | 0.0036 | CCDC71L   | coiled-coil domain containing 71-like            | Multiple_Complex |
| TC0100012816.hg.1    | 7.52  | 8.23  | -1.63 | 0.0008 | 0.0037 | CLSTN1    | calsyntenin 1                                    | Multiple_Complex |
| TC1200011393.hg.1    | 5.58  | 4.95  | 1.55  | 0.0008 | 0.0037 | PPFIA2    | protein tyrosine phosphatase, receptor type, f   | Multiple_Complex |
| TC1200012111.hg.1    | 12.3  | 11.27 | 2.04  | 0.0008 | 0.0037 | TAOK3     | TAO kinase 3                                     | Multiple_Complex |
| TC0300011167.hg.1    | 5.19  | 4.65  | 1.45  | 0.0008 | 0.0037 | BAP1      | BRCA1 associated protein 1                       | Multiple_Complex |
| TC1700009492.hg.1    | 5.85  | 5.25  | 1.51  | 0.0008 | 0.0037 | CAMKK1    | calcium/calmodulin-dependent protein kinase      | Multiple_Complex |
| TC1700010693.hg.1    | 9.21  | 9.99  | -1.72 | 0.0008 | 0.0037 | ACLY      | ATP citrate lyase                                | Multiple_Complex |
| TC0500007604.hg.1    | 9.72  | 10.4  | -1.6  | 0.0008 | 0.0037 | PPWD1     | peptidylprolyl isomerase domain and WD repr      | Multiple_Complex |
| TC0600007599.hg.1    | 9.21  | 10.11 | -1.86 | 0.0008 | 0.0037 | PRRC2A    | proline-rich coiled-coil 2A                      | Multiple_Complex |
| TC0800008032.hg.1    | 5.11  | 5.74  | -1.54 | 0.0009 | 0.0037 | ZC2HC1A   | zinc finger, C2HC-type containing 1A             | Multiple_Complex |
| TC1400009355.hg.1    | 5.02  | 5.68  | -1.59 | 0.0009 | 0.0037 | TRMT5     | tRNA methyltransferase 5                         | Multiple_Complex |
| TC1600007464.hg.1    | 4.66  | 4.12  | 1.45  | 0.0009 | 0.0037 | MYLPF     | myosin light chain, phosphorylatable, fast skel  | Multiple_Complex |
| TC1700012345.hg.1    | 8.52  | 9.51  | -1.99 | 0.0009 | 0.0037 | CTDNBP1   | CTD nuclear envelope phosphatase 1               | Multiple_Complex |
| TC1000010367.hg.1    | 5.09  | 5.7   | -1.53 | 0.0009 | 0.0037 | ZNF25     | zinc finger protein 25                           | Multiple_Complex |
| TC1200011741.hg.1    | 5.62  | 6.54  | -1.89 | 0.0009 | 0.0037 | C12orf42  | chromosome 12 open reading frame 42              | Multiple_Complex |
| TC0900012119.hg.1    | 5.76  | 6.23  | -1.39 | 0.0009 | 0.0037 | GALT      | galactose-1-phosphate uridylyltransferase        | Multiple_Complex |
| TC1000012389.hg.1    | 9.1   | 8.02  | 2.11  | 0.0009 | 0.0037 | ADAM8     | ADAM metallopeptidase domain 8                   | Multiple_Complex |
| TC1300007590.hg.1    | 10.17 | 11.1  | -1.9  | 0.0009 | 0.0037 | RBM26     | Memczak2013 ANTISENSE, CDS, coding, INTEF        | NonCoding        |
| TC0200016475.hg.1    | 6.64  | 7.05  | -1.33 | 0.0009 | 0.0037 | INO80B    | INO80 complex subunit B                          | Multiple_Complex |
| TC1100007780.hg.1    | 4.48  | 3.99  | 1.41  | 0.0009 | 0.0037 | MS4A10    | membrane-spanning 4-domains, subfamily A,        | Coding           |
| TC0X00008874.hg.1    | 11.27 | 11.85 | -1.5  | 0.0009 | 0.0037 | F8A2      | coagulation factor VIII-associated 2             | Coding           |
| TC1700012215.hg.1    | 7.25  | 8.18  | -1.91 | 0.0009 | 0.0037 | KSR1      | kinase suppressor of ras 1                       | Multiple_Complex |
| TC1100006477.hg.1    | 7.09  | 7.74  | -1.57 | 0.0009 | 0.0038 | PHRF1     | PHD and ring finger domains 1                    | Multiple_Complex |
| TC0100018483.hg.1    | 11.79 | 10.65 | 2.21  | 0.0009 | 0.0038 | HIST2H2BE | histone cluster 2, H2be                          | Coding           |
| TC0400011253.hg.1    | 8.13  | 7.28  | 1.8   | 0.0009 | 0.0038 | KLHL8     | kelch-like family member 8                       | Multiple_Complex |
| TC0500011875.hg.1    | 5.49  | 4.76  | 1.65  | 0.0009 | 0.0038 | PPIC      | peptidylprolyl isomerase C (cyclophilin C)       | Multiple_Complex |
| TC1800009222.hg.1    | 7.32  | 8.78  | -2.74 | 0.0009 | 0.0038 | RNF125    | ring finger protein 125, E3 ubiquitin protein li | Multiple_Complex |
| TC0100017828.hg.1    | 5.65  | 6.19  | -1.45 | 0.0009 | 0.0038 | B3GALNT2  | beta-1,3-N-acetylgalactosaminyltransferase 2     | Multiple_Complex |
| TC0100009943.hg.1    | 9.94  | 9.13  | 1.76  | 0.0009 | 0.0038 | SCNM1; TN | sodium channel modifier 1; tumor necrosis far    | Multiple_Complex |
| TC0X00011168.hg.1    | 11.28 | 10.58 | 1.63  | 0.0009 | 0.0038 | BCAP31    | B-cell receptor-associated protein 31            | Multiple_Complex |
| TC0200013541.hg.1    | 4.83  | 5.16  | -1.25 | 0.0009 | 0.0038 | SEMA4C    | sema domain, immunoglobulin domain (Ig), tr      | Multiple_Complex |
| TC1000012472.hg.1    | 8.84  | 8.13  | 1.64  | 0.0009 | 0.0038 | FAM25A    | family with sequence similarity 25, member A     | Coding           |

|                      |       |       |       |        |                  |                                                 |                  |
|----------------------|-------|-------|-------|--------|------------------|-------------------------------------------------|------------------|
| TC1400010649.hg.1    | 6.95  | 6.24  | 1.63  | 0.0009 | 0.0038 VRK1      | vaccinia related kinase 1                       | Multiple_Complex |
| TC0100013076.hg.1    | 10.55 | 8.44  | 4.32  | 0.0009 | 0.0038 PAD12     | peptidyl arginine deiminase, type II            | Multiple_Complex |
| TC0100011621.hg.1    | 5.92  | 5.24  | 1.61  | 0.0009 | 0.0038 TGF2; TGF | transforming growth factor beta 2; TGF2 ove     | Multiple_Complex |
| TC0800006880.hg.1    | 9.44  | 10.49 | -2.07 | 0.0009 | 0.0038 PCM1      | pericentriolar material 1                       | Multiple_Complex |
| TC2200006681.hg.1    | 12.14 | 12.81 | -1.59 | 0.0009 | 0.0038 CRKL      | v-crk avian sarcoma virus CT10 oncogene hom     | Multiple_Complex |
| TC1500007975.hg.1    | 8.73  | 9.73  | -2    | 0.0009 | 0.0038 IREB2     | iron responsive element binding protein 2       | Multiple_Complex |
| TC0X00009842.hg.1    | 4.19  | 4.77  | -1.5  | 0.0009 | 0.0038 SPIN2A    | spindlin family, member 2A                      | Coding           |
| TC1900008464.hg.1    | 3.84  | 3.54  | 1.23  | 0.0009 | 0.0038 C19orf68  | chromosome 19 open reading frame 68             | Multiple_Complex |
| TC0200009687.hg.1    | 9.14  | 9.62  | -1.39 | 0.0009 | 0.0038 ARL6IP6   | ADP-ribosylation factor like GTPase 6 interacti | Multiple_Complex |
| TC1700006652.hg.1    | 5.34  | 4.94  | 1.32  | 0.0009 | 0.0038 C17orf107 | chromosome 17 open reading frame 107            | Multiple_Complex |
| TC1900007297.hg.1    | 4.53  | 4.85  | -1.25 | 0.0009 | 0.0038 SIN3B     | SIN3 transcription regulator family member B    | Multiple_Complex |
| TC1400009690.hg.1    | 5.2   | 5.71  | -1.42 | 0.0009 | 0.0038 ABCD4     | ATP binding cassette subfamily D member 4       | Multiple_Complex |
| TC0600011233.hg.1    | 7.54  | 8.32  | -1.72 | 0.0009 | 0.0039 HIST1H3I  | histone cluster 1, H3i                          | Coding           |
| TC0200016637.hg.1    | 6.96  | 7.7   | -1.66 | 0.0009 | 0.0039 SMC6      | structural maintenance of chromosomes 6         | Multiple_Complex |
| TC1900009493.hg.1    | 4.91  | 4.47  | 1.36  | 0.0009 | 0.0039 CD209     | CD209 molecule                                  | Multiple_Complex |
| TC1700010358.hg.1    | 5.84  | 6.36  | -1.44 | 0.0009 | 0.0039 MYO1D     | myosin ID                                       | Multiple_Complex |
| TC1600010864.hg.1    | 6.58  | 7.2   | -1.54 | 0.0009 | 0.0039 WDR59     | WD repeat domain 59                             | Multiple_Complex |
| TSUnmapped00000445.h | 9.46  | 9.97  | -1.43 | 0.0009 | 0.0039 FBL       | fibrillarlin                                    | Coding           |
| TC1900011573.hg.1    | 3.26  | 3.78  | -1.43 | 0.0009 | 0.0039 ZNF416    | zinc finger protein 416                         | Coding           |
| TC1900011682.hg.1    | 14.49 | 13.75 | 1.67  | 0.0009 | 0.0039 RAB8A     | RAB8A, member RAS oncogene family               | Multiple_Complex |
| TC0500013219.hg.1    | 8.18  | 8.86  | -1.61 | 0.0009 | 0.0039 HSD17B4   | hydroxysteroid (17-beta) dehydrogenase 4        | Multiple_Complex |
| TC1200006850.hg.1    | 10.92 | 11.88 | -1.94 | 0.0009 | 0.0039 ETV6      | ets variant 6                                   | Multiple_Complex |
| TC0800008550.hg.1    | 8.72  | 9.55  | -1.77 | 0.0009 | 0.0039 EBAG9     | estrogen receptor binding site associated, anti | Multiple_Complex |
| TC1200008255.hg.1    | 7.67  | 6.51  | 2.23  | 0.0009 | 0.0039 ZDHHC17   | zinc finger, DHHC-type containing 17            | Multiple_Complex |
| TC1000011660.hg.1    | 7.47  | 8.57  | -2.15 | 0.0009 | 0.0039 MGEA5     | Salzman2013 ALT_ACCEPTOR, ALT_DONOR, c          | NonCoding        |
| TC0900007221.hg.1    | 5.62  | 6.13  | -1.42 | 0.0009 | 0.0039 LOC102724 | uncharacterized LOC102724238; uncharacteri      | Multiple_Complex |
| TC0100010233.hg.1    | 4.1   | 3.58  | 1.44  | 0.0009 | 0.0039 OR10K1    | olfactory receptor, family 10, subfamily K, me  | Coding           |
| TC1100012702.hg.1    | 5.38  | 6.27  | -1.86 | 0.0009 | 0.004 TMEM218    | transmembrane protein 218                       | Multiple_Complex |
| TC2100008537.hg.1    | 6.02  | 6.63  | -1.54 | 0.0009 | 0.004 C21orf33   | chromosome 21 open reading frame 33             | Multiple_Complex |
| TC1100011605.hg.1    | 5.2   | 5.75  | -1.46 | 0.0009 | 0.004 UCP3       | uncoupling protein 3 (mitochondrial, proton c   | Multiple_Complex |
| TC0900007520.hg.1    | 7.41  | 8.02  | -1.53 | 0.0009 | 0.004 SMC5       | structural maintenance of chromosomes 5         | Multiple_Complex |
| TC0100010553.hg.1    | 5.68  | 6.42  | -1.67 | 0.0009 | 0.004 C1orf112   | chromosome 1 open reading frame 112             | Multiple_Complex |
| TC0500008736.hg.1    | 9.4   | 11.11 | -3.26 | 0.0009 | 0.004 TGFBI      | transforming growth factor, beta-induced, 68I   | Multiple_Complex |
| TC0900007618.hg.1    | 4.63  | 5.47  | -1.79 | 0.0009 | 0.004 PCSK5      | proprotein convertase subtilisin/kexin type 5   | Multiple_Complex |
| TC0100017945.hg.1    | 6.17  | 6.94  | -1.7  | 0.0009 | 0.004 FH         | fumarate hydratase                              | Multiple_Complex |
| TC1400010704.hg.1    | 6.8   | 7.68  | -1.84 | 0.0009 | 0.004 CRIP1      | cysteine-rich protein 1 (intestinal)            | Multiple_Complex |
| TC1100010732.hg.1    | 5.16  | 4.63  | 1.45  | 0.0009 | 0.004 MYBPC3     | myosin binding protein C, cardiac               | Multiple_Complex |
| TC0500010199.hg.1    | 4.32  | 5.34  | -2.03 | 0.0009 | 0.004 FAM134B    | family with sequence similarity 134, member I   | Multiple_Complex |
| TC0800012066.hg.1    | 3.91  | 4.52  | -1.53 | 0.0009 | 0.004 TSNARE1    | t-SNARE domain containing 1                     | Multiple_Complex |
| TC1900012049.hg.1    | 5.45  | 6.28  | -1.77 | 0.0009 | 0.004 TMEM86B    | transmembrane protein 86B                       | Multiple_Complex |
| TC2200007576.hg.1    | 9.27  | 10.16 | -1.85 | 0.0009 | 0.004 PARVG      | parvin, gamma                                   | Multiple_Complex |
| TC0100010606.hg.1    | 5.92  | 6.79  | -1.83 | 0.0009 | 0.004 METTL13    | methyltransferase like 13                       | Multiple_Complex |
| TC0600013165.hg.1    | 5.78  | 6.49  | -1.63 | 0.0009 | 0.004 EPB41L2    | erythrocyte membrane protein band 4.1-like 2    | Multiple_Complex |
| TC0100007898.hg.1    | 9.91  | 10.81 | -1.87 | 0.0009 | 0.004 MACF1; KIA | microtubule-actin crosslinking factor 1; KIAA0  | Multiple_Complex |
| TC0200013109.hg.1    | 5.73  | 6.46  | -1.66 | 0.0009 | 0.004 PCGF1      | polycomb group ring finger 1                    | Multiple_Complex |
| TC0500013288.hg.1    | 5.35  | 4.82  | 1.45  | 0.0009 | 0.004 TAS2R1     | taste receptor, type 2, member 1                | Coding           |
| TC1000006859.hg.1    | 4.6   | 5.28  | -1.6  | 0.0009 | 0.004 SUV39H2    | suppressor of variegation 3-9 homolog 2 (Dro    | Multiple_Complex |
| TC1000011885.hg.1    | 5.29  | 6     | -1.63 | 0.0009 | 0.004 DCLRE1A    | DNA cross-link repair 1A                        | Multiple_Complex |
| TC0X00008886.hg.1    | 4.95  | 5.51  | -1.47 | 0.0009 | 0.004 GTPBP6     | GTP binding protein 6 (putative)                | Multiple_Complex |
| TC0100012870.hg.1    | 6.89  | 7.48  | -1.51 | 0.0009 | 0.004 EXOSC10    | exosome component 10                            | Multiple_Complex |
| TC1600009966.hg.1    | 5.71  | 6.6   | -1.85 | 0.0009 | 0.004 DCTPP1     | dCTP pyrophosphatase 1                          | Multiple_Complex |
| TC2200006827.hg.1    | 8.05  | 6.73  | 2.51  | 0.0009 | 0.004 GNAZ       | guanine nucleotide binding protein (G protein   | Multiple_Complex |
| TC2200007987.hg.1    | 6.09  | 5.74  | 1.27  | 0.0009 | 0.004 CLDN5      | claudin 5                                       | Coding           |
| TC0700012111.hg.1    | 5.13  | 4.14  | 1.99  | 0.0009 | 0.004 FBXL13     | F-box and leucine-rich repeat protein 13        | Multiple_Complex |
| TSUnmapped00000138.h | 6.54  | 7.36  | -1.77 | 0.0009 | 0.004 HYOU1      | hypoxia up-regulated 1                          | Coding           |
| TC0100013417.hg.1    | 8.25  | 7.37  | 1.84  | 0.0009 | 0.0041 SLC9A1    | solute carrier family 9, subfamily A (NHE1, cat | Multiple_Complex |
| TC0300013684.hg.1    | 8.85  | 8.08  | 1.71  | 0.0009 | 0.0041 TFRC      | transferrin receptor                            | Multiple_Complex |
| TC1400010775.hg.1    | 4.83  | 4.08  | 1.69  | 0.0009 | 0.0041 EFCAB11   | EF-hand calcium binding domain 11               | Multiple_Complex |
| TC1000010256.hg.1    | 10.1  | 10.57 | -1.39 | 0.001  | 0.0041 EPC1      | enhancer of polycomb homolog 1 (Drosophila      | Multiple_Complex |
| TC0300007236.hg.1    | 4.39  | 4.98  | -1.5  | 0.001  | 0.0041 LARS2     | leucyl-tRNA synthetase 2, mitochondrial         | Multiple_Complex |
| TC0100011211.hg.1    | 5.08  | 4.63  | 1.37  | 0.001  | 0.0041 GPR37L1   | G protein-coupled receptor 37 like 1            | Multiple_Complex |
| TC0800011634.hg.1    | 7.96  | 8.41  | -1.37 | 0.001  | 0.0041 SNTB1     | syntrophin, beta 1 (dystrophin-associated pro   | Multiple_Complex |
| TC1800009234.hg.1    | 7.96  | 8.41  | -1.37 | 0.001  | 0.0041 RP11-35G9 | Salzman2013 ANTISENSE, coding, INTERNAL, i      | NonCoding        |
| TC1200008026.hg.1    | 9.33  | 9.87  | -1.46 | 0.001  | 0.0041 LEMD3     | LEM domain containing 3                         | Multiple_Complex |
| TC0100013458.hg.1    | 5.87  | 6.46  | -1.5  | 0.001  | 0.0041 EYA3      | EYA transcriptional coactivator and phosphata   | Multiple_Complex |
| TC0900009043.hg.1    | 8.95  | 7.93  | 2.02  | 0.001  | 0.0041 GFI1B     | growth factor independent 1B transcription re   | Multiple_Complex |
| TC0700009518.hg.1    | 3.81  | 3.37  | 1.36  | 0.001  | 0.0041 OR2A5     | olfactory receptor, family 2, subfamily A, men  | Coding           |
| TC1900012020.hg.1    | 5.73  | 6.27  | -1.46 | 0.001  | 0.0041 ZNF432    | zinc finger protein 432                         | Multiple_Complex |
| TC1200009248.hg.1    | 5.8   | 6.32  | -1.44 | 0.001  | 0.0041 DDX55     | DEAD (Asp-Glu-Ala-Asp) box polypeptide 55       | Multiple_Complex |
| TC1700010202.hg.1    | 8.75  | 9.56  | -1.75 | 0.001  | 0.0041 KIAA0100  | KIAA0100                                        | Multiple_Complex |

|                      |       |       |       |        |        |            |                                                 |                  |
|----------------------|-------|-------|-------|--------|--------|------------|-------------------------------------------------|------------------|
| TC1400010779.hg.1    | 5.6   | 6.11  | -1.42 | 0.001  | 0.0041 | ATXN3      | ataxin 3                                        | NonCoding        |
| TC1800007446.hg.1    | 6.55  | 5.95  | 1.51  | 0.001  | 0.0041 | SEC11C     | SEC11 homolog C, signal peptidase complex s     | Multiple_Complex |
| TC1000009691.hg.1    | 6.01  | 6.8   | -1.73 | 0.001  | 0.0041 | IL2RA      | interleukin 2 receptor, alpha                   | Coding           |
| TC1100007812.hg.1    | 4.03  | 3.58  | 1.36  | 0.001  | 0.0041 | LRRC10B    | leucine rich repeat containing 10B              | Coding           |
| TC0500007349.hg.1    | 4.57  | 4.07  | 1.42  | 0.001  | 0.0041 | ISL1       | ISL LIM homeobox 1                              | Multiple_Complex |
| TC1300009013.hg.1    | 7.74  | 8.13  | -1.32 | 0.001  | 0.0042 | VPS36      | vacuolar protein sorting 36 homolog (S. cerevi  | Multiple_Complex |
| TC0600011615.hg.1    | 6.84  | 6.44  | 1.33  | 0.001  | 0.0042 | DEF6       | Memczak2013 ANTISENSE, CDS, coding, INTEF       | NonCoding        |
| TC0300008705.hg.1    | 10.35 | 8.98  | 2.58  | 0.001  | 0.0042 | ABTB1      | ankyrin repeat and BTB (POZ) domain contain     | Multiple_Complex |
| TC0300013336.hg.1    | 6.46  | 7.91  | -2.73 | 0.001  | 0.0042 | LAMP3      | lysosomal-associated membrane protein 3         | Multiple_Complex |
| TC0800009782.hg.1    | 8.57  | 7.22  | 2.56  | 0.001  | 0.0042 | CSGALNAC   | chondroitin sulfate N-acetylgalactosaminyltra   | Multiple_Complex |
| TC1500009182.hg.1    | 8.39  | 9.06  | -1.59 | 0.001  | 0.0042 | VPS39      | vacuolar protein sorting 39 homolog (S. cerevi  | Multiple_Complex |
| TC0300006552.hg.1    | 11.59 | 10.94 | 1.58  | 0.001  | 0.0042 | MTMR14     | myotubularin related protein 14                 | Multiple_Complex |
| TSUnmapped00000272.h | 3.9   | 4.46  | -1.48 | 0.001  | 0.0042 | ZKSCAN7    | zinc finger with KRAB and SCAN domains 7        | NonCoding        |
| TSUnmapped00000504.h | 4.5   | 5.16  | -1.57 | 0.001  | 0.0042 | ZNF197     | zinc finger protein 197                         | Coding           |
| TC0800007787.hg.1    | 5.1   | 4.57  | 1.44  | 0.001  | 0.0042 | CLVS1      | clavesin 1                                      | Multiple_Complex |
| TC1700010709.hg.1    | 6.25  | 5.5   | 1.68  | 0.001  | 0.0042 | KAT2A      | Memczak2013 ALT_DONOR, coding, INTERNA          | NonCoding        |
| TSUnmapped00000477.h | 9.95  | 10.71 | -1.69 | 0.001  | 0.0042 | SURF4      | surfeit 4                                       | Coding           |
| TC0900012234.hg.1    | 7.94  | 8.59  | -1.58 | 0.001  | 0.0042 | CBWD6; CE  | COBW domain containing 6; COBW domain cc        | Multiple_Complex |
| TC0500013381.hg.1    | 5.34  | 4.75  | 1.51  | 0.001  | 0.0042 | PRELID2    | PRELI domain containing 2                       | Multiple_Complex |
| TC0100007512.hg.1    | 4.5   | 4.09  | 1.33  | 0.001  | 0.0042 | GPR3       | G protein-coupled receptor 3                    | Coding           |
| TCOX00008831.hg.1    | 9.86  | 9.03  | 1.78  | 0.001  | 0.0042 | ATP6AP1    | ATPase, H+ transporting, lysosomal accessory    | Multiple_Complex |
| TC1000007132.hg.1    | 5.13  | 4.51  | 1.54  | 0.001  | 0.0042 | BAMBI      | BMP and activin membrane-bound inhibitor        | Multiple_Complex |
| TC16000010347.hg.1   | 4.48  | 5.38  | -1.86 | 0.001  | 0.0042 | RPGRIP1L   | RPGRIP1-like                                    | Multiple_Complex |
| TC1000008881.hg.1    | 10.97 | 12.21 | -2.36 | 0.001  | 0.0042 | MXI1       | MAX interactor 1, dimerization protein          | Multiple_Complex |
| TC0500009012.hg.1    | 7.8   | 6.98  | 1.76  | 0.001  | 0.0043 | TCERG1     | Transcript Identified by AceView, Entrez Gene   | Unassigned       |
| TC1900008112.hg.1    | 10.02 | 9.22  | 1.74  | 0.001  | 0.0043 | SHKBP1     | SH3KBP1 binding protein 1                       | Multiple_Complex |
| TC1500010726.hg.1    | 7.46  | 8.32  | -1.81 | 0.001  | 0.0043 | TMEM62     | transmembrane protein 62                        | Multiple_Complex |
| TC0500007231.hg.1    | 9.43  | 10.05 | -1.53 | 0.001  | 0.0043 | PTGER4     | prostaglandin E receptor 4 (subtype EP4)        | Multiple_Complex |
| TC1900010765.hg.1    | 4.15  | 3.56  | 1.51  | 0.001  | 0.0043 | CEACAM7    | carcinoembryonic antigen-related cell adhesic   | Multiple_Complex |
| TC0800010299.hg.1    | 4.64  | 5.42  | -1.71 | 0.001  | 0.0043 | RNF170; M  | ring finger protein 170; microRNA 4469          | Multiple_Complex |
| TC1700009392.hg.1    | 5.11  | 4.53  | 1.49  | 0.001  | 0.0043 | SCARF1     | scavenger receptor class F, member 1            | Multiple_Complex |
| TC0100010332.hg.1    | 7.42  | 8.1   | -1.6  | 0.001  | 0.0043 | NIT1       | nitrilase 1                                     | Multiple_Complex |
| TC0600011368.hg.1    | 4.5   | 3.88  | 1.53  | 0.001  | 0.0043 | GNL1       | guanine nucleotide binding protein-like 1       | Multiple_Complex |
| TC0600008486.hg.1    | 14.26 | 15.3  | -2.06 | 0.001  | 0.0043 | OGFRL1     | opioid growth factor receptor-like 1            | Multiple_Complex |
| TC0100017059.hg.1    | 7.16  | 8.13  | -1.96 | 0.001  | 0.0043 | RBBP5      | retinoblastoma binding protein 5                | Multiple_Complex |
| TC0100017538.hg.1    | 6.22  | 6.98  | -1.69 | 0.001  | 0.0043 | ITPKB      | Transcript Identified by AceView, Entrez Gene   | Coding           |
| TC1700011088.hg.1    | 4.79  | 4.36  | 1.34  | 0.001  | 0.0043 | COL1A1     | collagen, type I, alpha 1                       | Multiple_Complex |
| TC1600010450.hg.1    | 4.75  | 5.38  | -1.55 | 0.001  | 0.0043 | CIAPIN1    | cytokine induced apoptosis inhibitor 1          | Multiple_Complex |
| TC0100012872.hg.1    | 7.03  | 7.67  | -1.56 | 0.001  | 0.0043 | MTOR       | mechanistic target of rapamycin (serine/threo   | Multiple_Complex |
| TC1400007395.hg.1    | 4.57  | 3.96  | 1.53  | 0.001  | 0.0043 | SYT16      | synaptotagmin XVI                               | Multiple_Complex |
| TC0100009020.hg.1    | 4.4   | 5.11  | -1.63 | 0.001  | 0.0043 | CDC7       | cell division cycle 7                           | Multiple_Complex |
| TC1900011845.hg.1    | 5.3   | 5.9   | -1.52 | 0.001  | 0.0043 | MFSD12     | major facilitator superfamily domain containir  | Multiple_Complex |
| TC0300014090.hg.1    | 10.06 | 9.41  | 1.57  | 0.001  | 0.0043 | ATP13A3    | ATPase type 13A3                                | Multiple_Complex |
| TC0300009713.hg.1    | 4.41  | 4.05  | 1.29  | 0.001  | 0.0043 | EPHB3      | EPH receptor B3                                 | Multiple_Complex |
| TC1000007625.hg.1    | 4.27  | 3.97  | 1.23  | 0.001  | 0.0043 | PRKG1      | protein kinase, cGMP-dependent, type I          | Multiple_Complex |
| TC0200012288.hg.1    | 8.17  | 7.21  | 1.94  | 0.001  | 0.0044 | HNRNPLL    | heterogeneous nuclear ribonucleoprotein L-lii   | Multiple_Complex |
| TC0700013512.hg.1    | 10.18 | 9.65  | 1.44  | 0.001  | 0.0044 | CCZ1B      | CCZ1 homolog B, vacuolar protein trafficking i  | Multiple_Complex |
| TC0800009437.hg.1    | 15.41 | 10.9  | 22.73 | 0.001  | 0.0044 | DEFA1B; DI | defensin, alpha 1B; defensin, alpha 1; defensir | Coding           |
| TC0800012381.hg.1    | 15.41 | 10.9  | 22.73 | 0.001  | 0.0044 | DEFA1; DEF | defensin, alpha 1; defensin, alpha 1B           | Coding           |
| TC1900007397.hg.1    | 15.34 | 16.05 | -1.63 | 0.001  | 0.0044 | UBA52      | ubiquitin A-52 residue ribosomal protein fusio  | Multiple_Complex |
| TC0600007263.hg.1    | 5.66  | 4.84  | 1.77  | 0.001  | 0.0044 | HIST1H4A   | histone cluster 1, H4a                          | Coding           |
| TC0700013575.hg.1    | 9.7   | 10.08 | -1.3  | 0.001  | 0.0044 | STAG3L3; S | stromal antigen 3-like 3 (pseudogene); strom    | Multiple_Complex |
| TC1600009199.hg.1    | 6.4   | 7.02  | -1.54 | 0.001  | 0.0044 | SLX4       | SLX4 structure-specific endonuclease subunit    | Multiple_Complex |
| TC0100018137.hg.1    | 3.93  | 3.37  | 1.48  | 0.001  | 0.0044 | OR14I1     | olfactory receptor, family 14, subfamily I, men | Coding           |
| TC0300006483.hg.1    | 11.27 | 10.66 | 1.53  | 0.001  | 0.0044 | BHLHE40    | basic helix-loop-helix family, member e40       | Multiple_Complex |
| TC0700008427.hg.1    | 4.66  | 4.21  | 1.37  | 0.001  | 0.0044 | DLX6       | distal-less homeobox 6                          | Multiple_Complex |
| TC0400007460.hg.1    | 6.81  | 7.6   | -1.72 | 0.001  | 0.0044 | OCIAD1     | Transcript Identified by AceView, Entrez Gene   | Unassigned       |
| TC0500012539.hg.1    | 6.94  | 6.19  | 1.69  | 0.001  | 0.0044 | FAM114A2   | family with sequence similarity 114, member     | Multiple_Complex |
| TC0200014765.hg.1    | 4.63  | 5.49  | -1.81 | 0.0011 | 0.0044 | DPP4       | Transcript Identified by AceView, Entrez Gene   | Unassigned       |
| TC1900009100.hg.1    | 6.49  | 7.08  | -1.5  | 0.0011 | 0.0044 | POLRMT     | polymerase (RNA) mitochondrial (DNA directe     | Multiple_Complex |
| TC0400009935.hg.1    | 4.62  | 4.14  | 1.39  | 0.0011 | 0.0045 | CCDC96     | coiled-coil domain containing 96                | Coding           |
| TC1600010623.hg.1    | 7.11  | 6.58  | 1.43  | 0.0011 | 0.0045 | FHOD1      | formin homology 2 domain containing 1           | Multiple_Complex |
| TC1700008984.hg.1    | 14.92 | 13.98 | 1.91  | 0.0011 | 0.0045 | SEC14L1; S | SEC14-like lipid binding 1; small Cajal body-sp | Multiple_Complex |
| TC0200008646.hg.1    | 8.48  | 9.36  | -1.83 | 0.0011 | 0.0045 | CNOT11     | CCR4-NOT transcription complex subunit 11       | Multiple_Complex |
| TC0600012597.hg.1    | 6.47  | 5.71  | 1.69  | 0.0011 | 0.0045 | EPHA7      | EPH receptor A7                                 | Multiple_Complex |
| TC1900006468.hg.1    | 4.94  | 5.43  | -1.4  | 0.0011 | 0.0045 | GZMM       | granzyme M                                      | Coding           |
| TC1300006543.hg.1    | 7.05  | 7.92  | -1.83 | 0.0011 | 0.0045 | FGF9       | fibroblast growth factor 9                      | Multiple_Complex |
| TC0100013371.hg.1    | 6.74  | 7.32  | -1.49 | 0.0011 | 0.0045 | PAFAH2     | platelet-activating factor acetylhydrolase 2    | Multiple_Complex |
| TC1000010101.hg.1    | 13.01 | 12.42 | 1.51  | 0.0011 | 0.0045 | ABI1       | abl-interactor 1                                | Multiple_Complex |
| TC0900011992.hg.1    | 7.12  | 6.4   | 1.64  | 0.0011 | 0.0045 | AGPAT2     | 1-acylglycerol-3-phosphate O-acyltransferase    | Multiple_Complex |

|                      |       |       |       |        |        |            |                                                          |                  |
|----------------------|-------|-------|-------|--------|--------|------------|----------------------------------------------------------|------------------|
| TC0400006689.hg.1    | 7.76  | 8.61  | -1.81 | 0.0011 | 0.0045 | MAN2B2     | mannosidase, alpha, class 2B, member 2                   | Multiple_Complex |
| TC0300008514.hg.1    | 8.53  | 9.28  | -1.69 | 0.0011 | 0.0045 | NDUF84     | NADH dehydrogenase (ubiquinone) 1 beta subunit           | Multiple_Complex |
| TC1100006487.hg.1    | 12    | 10.8  | 2.29  | 0.0011 | 0.0045 | TALDO1     | transaldolase 1                                          | Multiple_Complex |
| TC0200007096.hg.1    | 10.18 | 9.49  | 1.61  | 0.0011 | 0.0045 | FOSL2      | FOS-like antigen 2                                       | Multiple_Complex |
| TC0200014260.hg.1    | 6.59  | 6.95  | -1.28 | 0.0011 | 0.0045 | CCDC115    | coiled-coil domain containing 115                        | Multiple_Complex |
| TSUnmapped00000538.h | 9.3   | 7.7   | 3.02  | 0.0011 | 0.0045 | DGKD       | diacylglycerol kinase, delta 130kDa                      | NonCoding        |
| TC0300011436.hg.1    | 5.45  | 6     | -1.46 | 0.0011 | 0.0045 | SUCLG2     | succinate-CoA ligase, GDP-forming, beta subunit          | Multiple_Complex |
| TC0100010159.hg.1    | 7.45  | 8.57  | -2.18 | 0.0011 | 0.0045 | SLC25A44   | solute carrier family 25, member 44                      | Multiple_Complex |
| TC1900008750.hg.1    | 9.37  | 9.84  | -1.38 | 0.0011 | 0.0045 | ZNF761; TP | zinc finger protein 761; tropomyosin 3 pseudorepeat      | Multiple_Complex |
| TC0900009779.hg.1    | 10.57 | 9.76  | 1.76  | 0.0011 | 0.0046 | C9orf72    | chromosome 9 open reading frame 72                       | Multiple_Complex |
| TC0400008994.hg.1    | 4.12  | 3.52  | 1.52  | 0.0011 | 0.0046 | PRSS48     | protease, serine, 48                                     | Coding           |
| TC0300011110.hg.1    | 4.91  | 5.35  | -1.35 | 0.0011 | 0.0046 | CACNA2D2   | calcium channel, voltage-dependent, alpha 2/delta 2      | Multiple_Complex |
| TC1300008879.hg.1    | 8.88  | 8.29  | 1.51  | 0.0011 | 0.0046 | MED4       | mediator complex subunit 4                               | Multiple_Complex |
| TSUnmapped00000427.h | 7.42  | 8     | -1.49 | 0.0011 | 0.0046 | FBL        | fibrillarin                                              | Coding           |
| TC0300012377.hg.1    | 7.77  | 6.76  | 2     | 0.0011 | 0.0046 | RAB43      | Memczak2013 ALT_ACCEPTOR, ALT_DONOR, RAB43               | NonCoding        |
| TC1900011004.hg.1    | 6.46  | 7.23  | -1.71 | 0.0011 | 0.0046 | SLC1A5     | solute carrier family 1 (neutral amino acid transporter) | Multiple_Complex |
| TC0900012195.hg.1    | 3.67  | 3.18  | 1.4   | 0.0011 | 0.0046 | LCN12      | lipocalin 12                                             | Multiple_Complex |
| TC1200008474.hg.1    | 6.11  | 6.63  | -1.44 | 0.0011 | 0.0046 | SOC52      | suppressor of cytokine signaling 2                       | Coding           |
| TSUnmapped00000286.h | 5.1   | 5.71  | -1.53 | 0.0011 | 0.0046 | HMBS       | hydroxymethylbilane synthase                             | Coding           |
| TC0100013811.hg.1    | 5.21  | 5.65  | -1.36 | 0.0011 | 0.0046 | MYCL       | v-myc avian myelocytomatosis viral oncogene              | Coding           |
| TC0100018424.hg.1    | 11.13 | 11.76 | -1.54 | 0.0011 | 0.0046 | HNRNPR     | heterogeneous nuclear ribonucleoprotein R                | Multiple_Complex |
| TC0300007051.hg.1    | 5.12  | 4.45  | 1.59  | 0.0011 | 0.0046 | ITGA9      | integrin alpha 9                                         | Multiple_Complex |
| TC0300013955.hg.1    | 4.62  | 3.89  | 1.66  | 0.0011 | 0.0046 | ZNF385D    | zinc finger protein 385D                                 | Multiple_Complex |
| TC1900007955.hg.1    | 4.55  | 5.1   | -1.47 | 0.0011 | 0.0046 | ZNF345     | zinc finger protein 345                                  | Multiple_Complex |
| TC0300014085.hg.1    | 6.36  | 7.21  | -1.81 | 0.0011 | 0.0046 | TBCCD1     | TBCC domain containing 1                                 | Multiple_Complex |
| TC1900011459.hg.1    | 4.61  | 5.2   | -1.51 | 0.0011 | 0.0046 | HSPBP1     | HSPA (heat shock 70kDa) binding protein, cytosolic       | Multiple_Complex |
| TC0300011448.hg.1    | 6.49  | 7.29  | -1.74 | 0.0011 | 0.0046 | EOGT       | EGF domain-specific O-linked N-acetylglucosaminase 2     | Multiple_Complex |
| TC1400007761.hg.1    | 9.74  | 10.46 | -1.65 | 0.0011 | 0.0047 | AHSA1      | AHA1, activator of heat shock 90kDa protein A            | Multiple_Complex |
| TC0100018185.hg.1    | 10.6  | 9.79  | 1.76  | 0.0011 | 0.0047 | MINOS1     | mitochondrial inner membrane organizing system           | Multiple_Complex |
| TC1900008482.hg.1    | 6.08  | 6.65  | -1.49 | 0.0011 | 0.0047 | SPHK2      | sphingosine kinase 2                                     | Multiple_Complex |
| TC1900010037.hg.1    | 5.52  | 6.26  | -1.67 | 0.0011 | 0.0047 | SUGP2      | SURP and G-patch domain containing 2                     | Multiple_Complex |
| TC1300007187.hg.1    | 7.79  | 8.47  | -1.6  | 0.0011 | 0.0047 | TRIM13; KC | tripartite motif containing 13; potassium channel        | Multiple_Complex |
| TC0200014250.hg.1    | 6.42  | 7.16  | -1.67 | 0.0011 | 0.0047 | SMPD4      | sphingomyelin phosphodiesterase 4, neutral family member | Multiple_Complex |
| TC0200010636.hg.1    | 5.33  | 4.62  | 1.63  | 0.0011 | 0.0047 | MAP2       | microtubule associated protein 2                         | Multiple_Complex |
| TC1500007034.hg.1    | 13.27 | 12.49 | 1.72  | 0.0011 | 0.0047 | SNAP23     | synaptosome associated protein 23kDa                     | Multiple_Complex |
| TC0700007398.hg.1    | 6.17  | 7.1   | -1.92 | 0.0011 | 0.0047 | ZMIZ2      | zinc finger, MIZ-type containing 2                       | Multiple_Complex |
| TC1200008677.hg.1    | 10.98 | 11.96 | -1.97 | 0.0011 | 0.0047 | RPL18A     | ribosomal protein L18a                                   | Multiple_Complex |
| TC1400009391.hg.1    | 5.8   | 6.59  | -1.74 | 0.0011 | 0.0047 | WDR89      | WD repeat domain 89                                      | Multiple_Complex |
| TC0200016740.hg.1    | 9.03  | 9.59  | -1.47 | 0.0011 | 0.0048 | ARLSA      | ADP-ribosylation factor like GTPase 5A                   | Multiple_Complex |
| TC0300009690.hg.1    | 5.8   | 6.56  | -1.68 | 0.0011 | 0.0048 | EIF2B5     | eukaryotic translation initiation factor 2B, subunit 5   | Multiple_Complex |
| TC0900008869.hg.1    | 7.67  | 8.25  | -1.5  | 0.0011 | 0.0048 | ODF2       | outer dense fiber of sperm tails 2                       | Multiple_Complex |
| TC1000008435.hg.1    | 5.31  | 4.59  | 1.64  | 0.0011 | 0.0048 | HECTD2     | HECT domain containing E3 ubiquitin protein ligase 2     | Multiple_Complex |
| TC0500009098.hg.1    | 4.39  | 4.01  | 1.3   | 0.0011 | 0.0048 | MYOZ3      | myozenin 3                                               | Multiple_Complex |
| TC0700013065.hg.1    | 3.62  | 4.28  | -1.58 | 0.0011 | 0.0048 | ABCF2      | ATP binding cassette subfamily F member 2                | Multiple_Complex |
| TSUnmapped00000785.h | 4.75  | 5.47  | -1.64 | 0.0011 | 0.0048 | ZNF780B    | zinc finger protein 780B                                 | Coding           |
| TC1000009104.hg.1    | 4.3   | 3.54  | 1.7   | 0.0011 | 0.0048 | PLPP4      | phospholipid phosphatase 4                               | Multiple_Complex |
| TC1700011697.hg.1    | 7.96  | 8.67  | -1.64 | 0.0011 | 0.0048 | CD300LB    | CD300 molecule-like family member B                      | Multiple_Complex |
| TC1200012707.hg.1    | 9.12  | 8.36  | 1.69  | 0.0012 | 0.0048 | ALDH2      | aldehyde dehydrogenase 2 family (mitochondrial)          | Multiple_Complex |
| TC1100006444.hg.1    | 9.36  | 8.62  | 1.67  | 0.0012 | 0.0048 | ATHL1      | ATH1, acid trehalase-like 1 (yeast)                      | Multiple_Complex |
| TC1100007490.hg.1    | 4.79  | 5.36  | -1.49 | 0.0012 | 0.0048 | FAM180B    | family with sequence similarity 180, member B            | Coding           |
| TC1600010168.hg.1    | 6.34  | 5.39  | 1.93  | 0.0012 | 0.0048 | SHCBP1     | SHC SH2-domain binding protein 1                         | Multiple_Complex |
| TC1300008983.hg.1    | 8.28  | 9.05  | -1.71 | 0.0012 | 0.0048 | INTS6      | integrator complex subunit 6                             | Multiple_Complex |
| TC1900010529.hg.1    | 4.19  | 4.92  | -1.66 | 0.0012 | 0.0048 | ZNF529     | zinc finger protein 529                                  | Multiple_Complex |
| TC1500007967.hg.1    | 8.13  | 8.87  | -1.67 | 0.0012 | 0.0048 | DNAJA4     | DnaJ (Hsp40) homolog, subfamily A, member 4              | Multiple_Complex |
| TC0900008484.hg.1    | 7     | 7.55  | -1.46 | 0.0012 | 0.0048 | PRPF4      | pre-mRNA processing factor 4                             | Multiple_Complex |
| TC1900011900.hg.1    | 5.69  | 6.28  | -1.51 | 0.0012 | 0.0048 | CHERP      | calcium homeostasis endoplasmic reticulum protein        | Multiple_Complex |
| TC0100011830.hg.1    | 5.65  | 6.46  | -1.76 | 0.0012 | 0.0048 | ZNF678     | zinc finger protein 678                                  | Multiple_Complex |
| TC0300009944.hg.1    | 4.43  | 4.78  | -1.28 | 0.0012 | 0.0048 | FAM43A     | family with sequence similarity 43, member A             | Multiple_Complex |
| TC1900011938.hg.1    | 6.27  | 6.92  | -1.57 | 0.0012 | 0.0048 | ZNF573     | zinc finger protein 573                                  | Multiple_Complex |
| TC0700012296.hg.1    | 8.97  | 8.27  | 1.63  | 0.0012 | 0.0049 | C7orf60    | chromosome 7 open reading frame 60                       | Multiple_Complex |
| TC0200014610.hg.1    | 11.79 | 10.68 | 2.16  | 0.0012 | 0.0049 | NMI        | N-myc (and STAT) interactor                              | Multiple_Complex |
| TC1700009162.hg.1    | 8.8   | 9.82  | -2.03 | 0.0012 | 0.0049 | C17orf89   | chromosome 17 open reading frame 89                      | Multiple_Complex |
| TC0100011263.hg.1    | 5.02  | 4.26  | 1.7   | 0.0012 | 0.0049 | OPTC       | opticin                                                  | Coding           |
| TC0100015956.hg.1    | 5.79  | 6.26  | -1.39 | 0.0012 | 0.0049 | RUSC1-AS1  | RUSC1 antisense RNA 1                                    | Multiple_Complex |
| TC1000009725.hg.1    | 7.54  | 8.23  | -1.61 | 0.0012 | 0.0049 | SFMBT2     | Scm-like with four mbt domains 2                         | Multiple_Complex |
| TC0200014703.hg.1    | 4.58  | 4.12  | 1.38  | 0.0012 | 0.0049 | CCDC148    | coiled-coil domain containing 148                        | Multiple_Complex |
| TC1200012617.hg.1    | 10.83 | 9.8   | 2.04  | 0.0012 | 0.0049 | FGD4       | FYVE, RhoGEF and PH domain containing 4                  | Multiple_Complex |
| TC0200010980.hg.1    | 4.13  | 3.78  | 1.28  | 0.0012 | 0.0049 | CCL20      | chemokine (C-C motif) ligand 20                          | Multiple_Complex |
| TC0400012458.hg.1    | 7.41  | 6.38  | 2.04  | 0.0012 | 0.0049 | HPGD       | hydroxyprostaglandin dehydrogenase 15-(N-acyl)           | Multiple_Complex |
| TC1200008933.hg.1    | 6.15  | 6.94  | -1.73 | 0.0012 | 0.0049 | TPCN1      | two pore segment channel 1                               | Multiple_Complex |

|                      |       |       |       |        |                                                                    |                  |
|----------------------|-------|-------|-------|--------|--------------------------------------------------------------------|------------------|
| TC0100013369.hg.1    | 6.56  | 7.44  | -1.83 | 0.0012 | 0.0049 STMN1; MI stathmin 1; microRNA 3917                         | Multiple_Complex |
| TC0900009279.hg.1    | 6.34  | 6.94  | -1.52 | 0.0012 | 0.0049 TOR4A torsin family 4, member A                             | Multiple_Complex |
| TC0300013923.hg.1    | 6.33  | 7.89  | -2.94 | 0.0012 | 0.0049 IL5RA interleukin 5 receptor, alpha                         | Multiple_Complex |
| TC1400008098.hg.1    | 8.48  | 10.68 | -4.6  | 0.0012 | 0.0049 GLRX5 glutaredoxin 5                                        | Multiple_Complex |
| TC1100006689.hg.1    | 4.78  | 4.08  | 1.63  | 0.0012 | 0.0049 OR51B6 olfactory receptor, family 51, subfamily B, me       | Coding           |
| TSUnmapped00000162.h | 9.45  | 10.09 | -1.56 | 0.0012 | 0.005 FBL fibrillarlin                                             | Coding           |
| TC1500008029.hg.1    | 6.16  | 5.23  | 1.9   | 0.0012 | 0.005 FAH fumarylacetoacetate hydrolase (fumarylaceto              | Multiple_Complex |
| TC2000007064.hg.1    | 5.36  | 4.81  | 1.47  | 0.0012 | 0.005 DEFB115 defensin, beta 115                                   | Coding           |
| TC2000009890.hg.1    | 4.42  | 5.14  | -1.65 | 0.0012 | 0.005 ANKEF1 ankyrin repeat and EF-hand domain containin           | Multiple_Complex |
| TC1500009946.hg.1    | 6.38  | 7.23  | -1.8  | 0.0012 | 0.005 MYO9A myosin IXA                                             | Multiple_Complex |
| TC1500009773.hg.1    | 8.3   | 8.88  | -1.49 | 0.0012 | 0.005 MTFMT mitochondrial methionyl-tRNA formyltransfer            | Multiple_Complex |
| TC1200007061.hg.1    | 5.75  | 6.71  | -1.94 | 0.0012 | 0.005 CMAS cytidine monophosphate N-acetylneuraminic               | Multiple_Complex |
| TC0200016643.hg.1    | 7.02  | 7.72  | -1.62 | 0.0012 | 0.005 DNMT3A DNA (cytosine-5-)-methyltransferase 3 alpha           | Multiple_Complex |
| TC0700013290.hg.1    | 5.02  | 5.68  | -1.58 | 0.0012 | 0.005 NCAPG2 non-SMC condensin II complex subunit G2               | Multiple_Complex |
| TC0100017365.hg.1    | 7.46  | 8.24  | -1.71 | 0.0012 | 0.005 EPRS glutamyl-prolyl-tRNA synthetase                         | Multiple_Complex |
| TC1600009482.hg.1    | 9.42  | 9.86  | -1.36 | 0.0012 | 0.005 PARN poly(A)-specific ribonuclease                           | Multiple_Complex |
| TC1100013170.hg.1    | 15.4  | 16.59 | -2.28 | 0.0012 | 0.005 EEF1G; MIF eukaryotic translation elongation factor 1 gar    | Multiple_Complex |
| TC0500010780.hg.1    | 6.79  | 6.17  | 1.54  | 0.0012 | 0.005 SLC38A9 Transcript Identified by AceView, Entrez Gene        | Unassigned       |
| TC1200012263.hg.1    | 6.41  | 7.34  | -1.91 | 0.0012 | 0.005 MPHOSPH9 M-phase phosphoprotein 9                            | Multiple_Complex |
| TC0800009523.hg.1    | 6.55  | 7.18  | -1.56 | 0.0012 | 0.005 MFHAS1 malignant fibrous histiocytoma amplified seq          | Multiple_Complex |
| TC0600014126.hg.1    | 8.18  | 9.05  | -1.83 | 0.0012 | 0.005 GLTSCR1L GLTSCR1-like                                        | Multiple_Complex |
| TC1900009320.hg.1    | 8.42  | 9.11  | -1.62 | 0.0012 | 0.005 ZBTB7A zinc finger and BTB domain containing 7A              | Multiple_Complex |
| TC2000008130.hg.1    | 7.32  | 8.3   | -1.98 | 0.0012 | 0.005 TBC1D20 TBC1 domain family, member 20                        | Multiple_Complex |
| TC1900006530.hg.1    | 8.52  | 9.13  | -1.53 | 0.0012 | 0.0051 DAZAP1 DAZ associated protein 1                             | Multiple_Complex |
| TC0X00011290.hg.1    | 4.39  | 3.94  | 1.37  | 0.0012 | 0.0051 GAGE1 G antigen 1                                           | Multiple_Complex |
| TC0100018235.hg.1    | 5.29  | 5.82  | -1.44 | 0.0012 | 0.0051 FPGT-TNNI1 FPGT-TNNI3K readthrough; fucose-1-phospha        | Multiple_Complex |
| TC0200016768.hg.1    | 8.99  | 8.23  | 1.69  | 0.0012 | 0.0051 PECR peroxisomal trans-2-enoyl-CoA reductase                | Multiple_Complex |
| TC1700010810.hg.1    | 10.43 | 10.91 | -1.39 | 0.0012 | 0.0051 LSM12 LSM12 homolog                                         | Multiple_Complex |
| TC0400012901.hg.1    | 6.67  | 5.77  | 1.87  | 0.0012 | 0.0051 FBXL5 F-box and leucine-rich repeat protein 5               | NonCoding        |
| TC1000010555.hg.1    | 8.51  | 9.35  | -1.79 | 0.0012 | 0.0051 AGAP9; BW ArfGAP with GTPase domain, ankyrin repeat a       | Multiple_Complex |
| TC1100012959.hg.1    | 7.39  | 8.18  | -1.73 | 0.0012 | 0.0051 TIMM10B translocase of inner mitochondrial membrane         | Multiple_Complex |
| TC0600007636.hg.1    | 9.33  | 9.91  | -1.49 | 0.0012 | 0.0051 RNF5 ring finger protein 5, E3 ubiquitin protein ligas      | Multiple_Complex |
| TC1900007760.hg.1    | 6.34  | 5.77  | 1.48  | 0.0012 | 0.0051 FAAP24 Fanconi anemia core complex associated prot          | Multiple_Complex |
| TC0500007690.hg.1    | 6.25  | 5.68  | 1.48  | 0.0012 | 0.0051 SERF1B; SE small EDRK-rich factor 1B (centromeric); small   | Multiple_Complex |
| TC0500007698.hg.1    | 6.25  | 5.68  | 1.48  | 0.0012 | 0.0051 SERF1A small EDRK-rich factor 1A (telomeric)                | Multiple_Complex |
| TC1700010717.hg.1    | 11.5  | 10.56 | 1.92  | 0.0012 | 0.0051 STAT5B signal transducer and activator of transcrip         | Multiple_Complex |
| TC0200009883.hg.1    | 4.94  | 4.27  | 1.59  | 0.0012 | 0.0051 XIRP2 xin actin binding repeat containing 2                 | Coding           |
| TC0X00010329.hg.1    | 4.14  | 4.82  | -1.61 | 0.0012 | 0.0051 TSPAN6 tetraspanin 6                                        | Multiple_Complex |
| TC1200006966.hg.1    | 10.99 | 10.39 | 1.51  | 0.0012 | 0.0051 STRAP serine/threonine kinase receptor associated p         | Multiple_Complex |
| TC1200006649.hg.1    | 8.7   | 8.09  | 1.53  | 0.0013 | 0.0051 TPI1 triosephosphate isomerase 1                            | Multiple_Complex |
| TC0600011065.hg.1    | 5.64  | 5.06  | 1.49  | 0.0013 | 0.0051 KIAA0319 KIAA0319                                           | Coding           |
| TC0400007876.hg.1    | 6.87  | 7.37  | -1.41 | 0.0013 | 0.0051 THAP6 THAP domain containing 6                              | Multiple_Complex |
| TC1000008011.hg.1    | 5.39  | 4.75  | 1.55  | 0.0013 | 0.0052 OIT3 oncoprotein induced transcript 3                       | Multiple_Complex |
| TC0X00011244.hg.1    | 9.48  | 10.05 | -1.48 | 0.0013 | 0.0052 F8A3 coagulation factor VIII-associated 3                   | Coding           |
| TC0Y00006812.hg.1    | 4.53  | 3.99  | 1.46  | 0.0013 | 0.0052 DAZ2; DAZ2 deleted in azoospermia 2; deleted in azoosper    | Multiple_Complex |
| TC1600007485.hg.1    | 8.55  | 7.83  | 1.64  | 0.0013 | 0.0052 FBRS fibrosin                                               | Multiple_Complex |
| TC0400009944.hg.1    | 4.37  | 3.97  | 1.32  | 0.0013 | 0.0052 PSAPL1 prosaposin-like 1 (gene/pseudogene)                  | Multiple_Complex |
| TC0100013908.hg.1    | 8.34  | 9.19  | -1.8  | 0.0013 | 0.0052 SLC2A1 solute carrier family 2 (facilitated glucose tran    | Multiple_Complex |
| TC0400008624.hg.1    | 4.26  | 4.96  | -1.62 | 0.0013 | 0.0052 SPATA5 Transcript Identified by AceView, Entrez Gene        | Unassigned       |
| TC1600010801.hg.1    | 4.78  | 4.24  | 1.46  | 0.0013 | 0.0052 PKD1L3 polycystic kidney disease 1-like 3                   | Multiple_Complex |
| TC2200008459.hg.1    | 5.28  | 5.78  | -1.42 | 0.0013 | 0.0052 MORC2 MORC family CW-type zinc finger 2                     | Multiple_Complex |
| TC1900008337.hg.1    | 8.63  | 8.19  | 1.36  | 0.0013 | 0.0052 EML2-AS1 EML2 antisense RNA 1                               | Multiple_Complex |
| TC0600014262.hg.1    | 8.82  | 8.25  | 1.49  | 0.0013 | 0.0052 ABHD16A abhydrolase domain containing 16A                   | Multiple_Complex |
| TC1300008834.hg.1    | 4.34  | 3.77  | 1.48  | 0.0013 | 0.0052 SIAH3 siah E3 ubiquitin protein ligase family membe         | Coding           |
| TC0300007161.hg.1    | 7.56  | 8.16  | -1.51 | 0.0013 | 0.0052 VIPR1 vasoactive intestinal peptide receptor 1              | Multiple_Complex |
| TC0500009861.hg.1    | 4.72  | 4.13  | 1.51  | 0.0013 | 0.0053 SLC6A3 solute carrier family 6 (neurotransmitter trans      | Multiple_Complex |
| TC1500009138.hg.1    | 5.47  | 6.22  | -1.69 | 0.0013 | 0.0053 INO80 INO80 complex subunit                                 | Multiple_Complex |
| TC1400010263.hg.1    | 7.28  | 6.73  | 1.47  | 0.0013 | 0.0053 CINP cyclin-dependent kinase 2 interacting protein          | Multiple_Complex |
| TC0200012129.hg.1    | 7.39  | 8.04  | -1.57 | 0.0013 | 0.0053 TRMT61B tRNA methyltransferase 61B                          | Multiple_Complex |
| TC0700009667.hg.1    | 5.78  | 6.42  | -1.56 | 0.0013 | 0.0053 LRR61 leucine rich repeat containing 61                     | Multiple_Complex |
| TC1700007444.hg.1    | 7.48  | 6.65  | 1.78  | 0.0013 | 0.0053 NSRP1; MIF nuclear speckle splicing regulatory protein 1; r | Multiple_Complex |
| TC0400010898.hg.1    | 4.34  | 3.73  | 1.53  | 0.0013 | 0.0053 TMPRSS11F transmembrane protease, serine 11F                | Coding           |
| TC1400009784.hg.1    | 8.1   | 8.79  | -1.61 | 0.0013 | 0.0053 VIPAS39 VPS33B interacting protein, apical-basolateral      | Multiple_Complex |
| TC1900009188.hg.1    | 8.4   | 8.97  | -1.48 | 0.0013 | 0.0053 REXO1; MII REX1, RNA exonuclease 1 homolog; microRNA        | Multiple_Complex |
| TC1100007938.hg.1    | 10.4  | 9.61  | 1.72  | 0.0013 | 0.0053 FERMT3 fermitin family member 3                             | Multiple_Complex |
| TC0200006715.hg.1    | 7.7   | 8.25  | -1.46 | 0.0013 | 0.0053 PQLC3 PQ loop repeat containing 3                           | Multiple_Complex |
| TC1200008931.hg.1    | 5.68  | 6.36  | -1.61 | 0.0013 | 0.0053 RITA1 RBPJ interacting and tubulin associated 1             | Coding           |
| TC0800012382.hg.1    | 15.32 | 10.92 | 21.16 | 0.0013 | 0.0053 DEFA3 defensin, alpha 3, neutrophil-specific                | Coding           |
| TC0300011049.hg.1    | 6.58  | 5.84  | 1.67  | 0.0013 | 0.0053 QRICH1 Transcript Identified by AceView, Entrez Gene        | Unassigned       |
| TC0700008927.hg.1    | 6.65  | 6     | 1.56  | 0.0013 | 0.0053 ING3 Transcript Identified by AceView, Entrez Gene          | Unassigned       |

|                      |       |       |       |        |        |             |                                                   |                  |
|----------------------|-------|-------|-------|--------|--------|-------------|---------------------------------------------------|------------------|
| TC0800008352.hg.1    | 12.92 | 13.56 | -1.55 | 0.0013 | 0.0053 | VPS13B      | vacuolar protein sorting 13 homolog B (yeast)     | Multiple_Complex |
| TC1700009522.hg.1    | 7.74  | 8.39  | -1.57 | 0.0013 | 0.0054 | PELP1       | proline, glutamate and leucine rich protein 1     | Multiple_Complex |
| TC1100011751.hg.1    | 4.3   | 4.87  | -1.48 | 0.0013 | 0.0054 | NARS2       | asparaginyl-tRNA synthetase 2, mitochondrial      | Multiple_Complex |
| TC0300010357.hg.1    | 5.74  | 6.18  | -1.36 | 0.0013 | 0.0054 | CHCHD4      | coiled-coil-helix-coiled-coil-helix domain cont   | Multiple_Complex |
| TC0600011357.hg.1    | 8.06  | 8.46  | -1.32 | 0.0013 | 0.0054 | TRIM26      | tripartite motif containing 26                    | Multiple_Complex |
| TC1500010756.hg.1    | 4.69  | 4.11  | 1.49  | 0.0013 | 0.0054 | RAB11A      | RAB11A, member RAS oncogene family                | NonCoding        |
| TC1400010620.hg.1    | 7.83  | 6.85  | 1.97  | 0.0013 | 0.0054 | SNAPC1      | small nuclear RNA activating complex polypep      | Multiple_Complex |
| TC1900011124.hg.1    | 4.89  | 5.51  | -1.54 | 0.0013 | 0.0054 | C19orf73    | chromosome 19 open reading frame 73               | Coding           |
| TC2000008516.hg.1    | 4.84  | 5.88  | -2.07 | 0.0013 | 0.0054 | SNX5        | Zhang2013 ALT_ACCEPTOR, ALT_DONOR, cod            | NonCoding        |
| TC0300014074.hg.1    | 5.83  | 6.74  | -1.87 | 0.0013 | 0.0054 | IFT80       | intraflagellar transport 80                       | Multiple_Complex |
| TC0200010273.hg.1    | 8.48  | 7.96  | 1.43  | 0.0013 | 0.0054 | NAB1        | NGFI-A binding protein 1                          | Multiple_Complex |
| TC0100015588.hg.1    | 6.9   | 7.42  | -1.43 | 0.0013 | 0.0054 | RNF115      | ring finger protein 115                           | Multiple_Complex |
| TSUnmapped00000327.h | 7.08  | 7.56  | -1.39 | 0.0013 | 0.0054 | HYOU1       | hypoxia up-regulated 1                            | Coding           |
| TC0100018282.hg.1    | 7.29  | 6.57  | 1.65  | 0.0013 | 0.0054 | POLR3GL     | polymerase (RNA) III (DNA directed) polypepti     | Multiple_Complex |
| TC1100007739.hg.1    | 4.56  | 3.99  | 1.48  | 0.0013 | 0.0054 | OR4D11      | olfactory receptor, family 4, subfamily D, men    | Coding           |
| TC0200013284.hg.1    | 7.58  | 8.03  | -1.36 | 0.0013 | 0.0055 | C2orf68     | chromosome 2 open reading frame 68                | Multiple_Complex |
| TC0Y00007325.hg.1    | 4.64  | 4.26  | 1.3   | 0.0013 | 0.0055 | LOC728395   | Homo sapiens similar to testis specific protein   | Multiple_Complex |
| TC1700010408.hg.1    | 5.47  | 4.77  | 1.63  | 0.0013 | 0.0055 | CCT6B       | chaperonin containing TCP1, subunit 6B (zeta      | Multiple_Complex |
| TC1800006834.hg.1    | 6.95  | 6.33  | 1.53  | 0.0013 | 0.0055 | SNRPD1      | small nuclear ribonucleoprotein D1 polypeptic     | Multiple_Complex |
| TC1700010314.hg.1    | 12.37 | 11.02 | 2.55  | 0.0013 | 0.0055 | EV12A; EV12 | ecotropic viral integration site 2A; ecotropic vi | Coding           |
| TC1200008322.hg.1    | 6.14  | 6.84  | -1.62 | 0.0013 | 0.0055 | TMTC2       | transmembrane and tetratricopeptide repeat        | Multiple_Complex |
| TC0200010785.hg.1    | 14.91 | 16.11 | -2.3  | 0.0013 | 0.0055 | CXCR2       | chemokine (C-X-C motif) receptor 2                | Multiple_Complex |
| TC0X00009911.hg.1    | 5.29  | 4.65  | 1.55  | 0.0014 | 0.0055 | VSIG4       | V-set and immunoglobulin domain containing        | Coding           |
| TC0300011951.hg.1    | 4.44  | 3.69  | 1.68  | 0.0014 | 0.0055 | MORC1       | MORC family CW-type zinc finger 1                 | Coding           |
| TC0500013227.hg.1    | 6.4   | 7.39  | -1.99 | 0.0014 | 0.0055 | CDC42SE2    | CDC42 small effector 2                            | NonCoding        |
| TC1700008134.hg.1    | 6.67  | 6.03  | 1.55  | 0.0014 | 0.0055 | TBKBP1      | TBK1 binding protein 1                            | Coding           |
| TC0600007711.hg.1    | 4.41  | 5.36  | -1.93 | 0.0014 | 0.0055 | ITPR3       | inositol 1,4,5-trisphosphate receptor, type 3     | Multiple_Complex |
| TC0400007848.hg.1    | 5.35  | 4.69  | 1.58  | 0.0014 | 0.0055 | MTHFD2L     | methylenetetrahydrofolate dehydrogenase (N        | Multiple_Complex |
| TC1000011592.hg.1    | 6.31  | 7     | -1.62 | 0.0014 | 0.0055 | COX15       | cytochrome c oxidase assembly homolog 15 (        | Multiple_Complex |
| TC2200009366.hg.1    | 7.43  | 6.79  | 1.56  | 0.0014 | 0.0055 | CHKB-CPT1   | CHKB-CPT1B readthrough (NMD candidate)            | Multiple_Complex |
| TC1100013051.hg.1    | 7.42  | 8.11  | -1.62 | 0.0014 | 0.0055 | RBM14-RBI   | RBM14-RBM4 readthrough                            | Multiple_Complex |
| TC1000010976.hg.1    | 9.17  | 10    | -1.78 | 0.0014 | 0.0055 | SPOCK2      | sparc/osteonectin, cwcv and kazal-like domai      | Multiple_Complex |
| TC0900009333.hg.1    | 13.79 | 12.61 | 2.26  | 0.0014 | 0.0055 | FAM157B     | family with sequence similarity 157, member       | Multiple_Complex |
| TC1700008587.hg.1    | 5.67  | 5.17  | 1.41  | 0.0014 | 0.0056 | PRR29       | proline rich 29                                   | Multiple_Complex |
| TC0600012123.hg.1    | 4.29  | 5.07  | -1.71 | 0.0014 | 0.0056 | DST         | dystonin                                          | Multiple_Complex |
| TC1100012852.hg.1    | 3.98  | 4.42  | -1.36 | 0.0014 | 0.0056 | LOC103611   | uncharacterized LOC103611081; uncharacteri        | Multiple_Complex |
| TC0100011219.hg.1    | 7     | 8.23  | -2.35 | 0.0014 | 0.0056 | PPP1R12B    | protein phosphatase 1, regulatory subunit 12B     | Multiple_Complex |
| TC1600007440.hg.1    | 14.65 | 14.05 | 1.51  | 0.0014 | 0.0056 | ALDOA       | aldolase A, fructose-bisphosphate                 | Multiple_Complex |
| TC0300013846.hg.1    | 5.02  | 4.52  | 1.42  | 0.0014 | 0.0056 | GXYLT2      | glucoside xylosyltransferase 2                    | Multiple_Complex |
| TC1200009183.hg.1    | 8.22  | 9.04  | -1.77 | 0.0014 | 0.0056 | SETD1B      | SET domain containing 1B                          | Multiple_Complex |
| TC0600009059.hg.1    | 12.32 | 11.11 | 2.33  | 0.0014 | 0.0056 | FOXO3       | forkhead box O3                                   | Multiple_Complex |
| TC1700006684.hg.1    | 5.86  | 6.66  | -1.74 | 0.0014 | 0.0056 | MIS12       | MIS12 kinetochore complex component               | Multiple_Complex |
| TC0900008312.hg.1    | 7.56  | 6.6   | 1.95  | 0.0014 | 0.0056 | SLC44A1     | solute carrier family 44 (choline transporter),   | Multiple_Complex |
| TC0700011500.hg.1    | 7.13  | 6.63  | 1.41  | 0.0014 | 0.0057 | STX1A       | syntaxin 1A (brain)                               | Multiple_Complex |
| TC1000012066.hg.1    | 6.3   | 7.07  | -1.71 | 0.0014 | 0.0057 | NSMCE4A     | NSE4 homolog A, SMC5-SMC6 complex compr           | Multiple_Complex |
| TC0100008090.hg.1    | 5.33  | 5.67  | -1.27 | 0.0014 | 0.0057 | DMAP1       | DNA methyltransferase 1 associated protein 1      | Multiple_Complex |
| TC0100016155.hg.1    | 7.68  | 7.07  | 1.53  | 0.0014 | 0.0057 | USF1        | upstream transcription factor 1                   | Multiple_Complex |
| TC0200015009.hg.1    | 12.46 | 12.92 | -1.37 | 0.0014 | 0.0057 | ATF2        | activating transcription factor 2                 | Multiple_Complex |
| TSUnmapped00000615.h | 7.84  | 8.53  | -1.61 | 0.0014 | 0.0057 | LRIG1       |                                                   | Coding           |
| TC2000006444.hg.1    | 4.89  | 5.41  | -1.43 | 0.0014 | 0.0057 | TRIB3       | tribbles pseudokinase 3                           | Multiple_Complex |
| TC0100007484.hg.1    | 15.69 | 14.81 | 1.84  | 0.0014 | 0.0057 | ZDHC18      | zinc finger, DHHC-type containing 18              | Multiple_Complex |
| TC0500013230.hg.1    | 6.11  | 6.63  | -1.44 | 0.0014 | 0.0057 | PCBD2       | pterin-4 alpha-carbinolamine dehydratase/dir      | Multiple_Complex |
| TC0800008300.hg.1    | 10.05 | 9.44  | 1.53  | 0.0014 | 0.0057 | CPQ         | carboxypeptidase Q                                | Multiple_Complex |
| TC0500012975.hg.1    | 5.95  | 5.45  | 1.41  | 0.0014 | 0.0057 | DBN1        | drebrin 1                                         | Multiple_Complex |
| TC0600009488.hg.1    | 12.82 | 11.09 | 3.3   | 0.0014 | 0.0057 | RPS12       | ribosomal protein S12                             | Multiple_Complex |
| TC0500011277.hg.1    | 4.35  | 3.75  | 1.52  | 0.0014 | 0.0057 | ANKRD34B    | ankyrin repeat domain 34B                         | Coding           |
| TC0700010619.hg.1    | 6.06  | 7.03  | -1.95 | 0.0014 | 0.0057 | SCRN1       | secernin 1                                        | Multiple_Complex |
| TC0200007411.hg.1    | 11.46 | 10.95 | 1.43  | 0.0014 | 0.0057 | PPM1B       | protein phosphatase, Mg2+/Mn2+ dependent          | Multiple_Complex |
| TC0700009333.hg.1    | 7.87  | 8.47  | -1.52 | 0.0014 | 0.0057 | UBN2        | ubiquitin 2                                       | Multiple_Complex |
| TC0100016548.hg.1    | 6.73  | 6.42  | 1.24  | 0.0014 | 0.0057 | ABL2        | ABL proto-oncogene 2, non-receptor tyrosine       | Multiple_Complex |
| TC1300008025.hg.1    | 6.83  | 5.96  | 1.83  | 0.0014 | 0.0057 | ING1        | inhibitor of growth family member 1               | Coding           |
| TC1600009079.hg.1    | 4.37  | 3.99  | 1.3   | 0.0014 | 0.0057 | NOXO1       | NADPH oxidase organizer 1                         | Multiple_Complex |
| TC1200010616.hg.1    | 17.27 | 17.67 | -1.32 | 0.0014 | 0.0057 | TUBA1B      | tubulin, alpha 1b                                 | Multiple_Complex |
| TC1700010675.hg.1    | 3.89  | 3.36  | 1.45  | 0.0014 | 0.0057 | KRT13       | keratin 13, type I                                | Multiple_Complex |
| TC0600007084.hg.1    | 5.12  | 4.68  | 1.36  | 0.0014 | 0.0058 | RBM24       | RNA binding motif protein 24                      | Multiple_Complex |
| TC1000007846.hg.1    | 9.41  | 10.14 | -1.67 | 0.0014 | 0.0058 | SIRT1       | sirtuin 1                                         | Multiple_Complex |
| TC0200014029.hg.1    | 6.96  | 6.37  | 1.51  | 0.0014 | 0.0058 | C2orf76     | chromosome 2 open reading frame 76                | Multiple_Complex |
| TC0X00008824.hg.1    | 11.7  | 12.41 | -1.64 | 0.0014 | 0.0058 | TKTL1       | transketolase-like 1                              | Multiple_Complex |
| TC0100015891.hg.1    | 9.61  | 10.71 | -2.14 | 0.0014 | 0.0058 | CRTC2       | CREB regulated transcription coactivator 2        | Multiple_Complex |
| TC1100009175.hg.1    | 5.76  | 6.18  | -1.34 | 0.0014 | 0.0058 | CEP164      | centrosomal protein 164kDa                        | Multiple_Complex |



|                      |       |       |       |        |                   |                                                  |                  |
|----------------------|-------|-------|-------|--------|-------------------|--------------------------------------------------|------------------|
| TC0500011334.hg.1    | 8.07  | 9.34  | -2.42 | 0.0014 | 0.0058 TMEM1674   | Transcript Identified by AceView, Entrez Gene    | Unassigned       |
| TC1100009398.hg.1    | 9.3   | 7.98  | 2.49  | 0.0014 | 0.0058 NRG1       | neurogranin (protein kinase C substrate, RC3)    | Multiple_Complex |
| TC1900011469.hg.1    | 5.28  | 5.82  | -1.45 | 0.0014 | 0.0058 TMEM238    | transmembrane protein 238                        | Multiple_Complex |
| TC0300008242.hg.1    | 7.44  | 6.78  | 1.58  | 0.0014 | 0.0058 ALCAM      | activated leukocyte cell adhesion molecule       | Multiple_Complex |
| TC0600009393.hg.1    | 8.69  | 9.29  | -1.51 | 0.0014 | 0.0058 RNF146     | ring finger protein 146                          | Multiple_Complex |
| TC2200008169.hg.1    | 4.2   | 3.66  | 1.45  | 0.0015 | 0.0058 LOC388882  | uncharacterized LOC388882; novel transcript      | Multiple_Complex |
| TC0700009089.hg.1    | 5.03  | 4.6   | 1.34  | 0.0015 | 0.0059 STRIP2     | striatin interacting protein 2                   | Multiple_Complex |
| TC0500007682.hg.1    | 10.32 | 11.09 | -1.7  | 0.0015 | 0.0059 GTF2H2C2   | GTF2H2 family member C, copy 2; GTF2H2 far       | Multiple_Complex |
| TC0200011023.hg.1    | 11.17 | 12.27 | -2.14 | 0.0015 | 0.0059 SP100      | SP100 nuclear antigen                            | Multiple_Complex |
| TC1200008016.hg.1    | 4.55  | 3.82  | 1.66  | 0.0015 | 0.0059 TBC1D30    | TBC1 domain family, member 30                    | Multiple_Complex |
| TC1600006979.hg.1    | 5.53  | 6.37  | -1.79 | 0.0015 | 0.0059 MKL2; TVP2 | MKL/myocardin-like 2; TVP23C pseudogene 2        | Multiple_Complex |
| TC1900009102.hg.1    | 5.31  | 6.03  | -1.64 | 0.0015 | 0.0059 RNF126     | ring finger protein 126                          | Multiple_Complex |
| TC1200007816.hg.1    | 6.94  | 7.52  | -1.5  | 0.0015 | 0.0059 DGKA       | diacylglycerol kinase alpha                      | Multiple_Complex |
| TC0100015890.hg.1    | 4.77  | 5.56  | -1.73 | 0.0015 | 0.0059 DENND4B    | DENN/MADD domain containing 4B                   | Multiple_Complex |
| TC0400012755.hg.1    | 6.36  | 7.06  | -1.62 | 0.0015 | 0.0059 ZNF141     | zinc finger protein 141                          | NonCoding        |
| TC0500006507.hg.1    | 6.19  | 5.44  | 1.68  | 0.0015 | 0.0059 LPCAT1     | Memczak2013 ANTISENSE, coding, INTERNAL          | NonCoding        |
| TC2000007058.hg.1    | 6.8   | 8.03  | -2.34 | 0.0015 | 0.0059 FRG1BP     | FSD region gene 1 family member B, pseudo        | Multiple_Complex |
| TC0200012936.hg.1    | 5.25  | 5.76  | -1.43 | 0.0015 | 0.0059 FBX048     | F-box protein 48                                 | Coding           |
| TC0200008587.hg.1    | 8.09  | 8.79  | -1.62 | 0.0015 | 0.0059 EIF5B      | eukaryotic translation initiation factor 5B      | Multiple_Complex |
| TC1300009856.hg.1    | 8.06  | 8.42  | -1.29 | 0.0015 | 0.0059 TUBGCP3    | tubulin, gamma complex associated protein 3      | Multiple_Complex |
| TC1000009414.hg.1    | 8.88  | 8.03  | 1.81  | 0.0015 | 0.0059 INPP5A     | inositol polyphosphate-5-phosphatase A           | Multiple_Complex |
| TC1700011260.hg.1    | 7.5   | 8.27  | -1.7  | 0.0015 | 0.0059 MTMR4      | myotubularin related protein 4                   | Multiple_Complex |
| TC0100011619.hg.1    | 6.88  | 7.36  | -1.4  | 0.0015 | 0.006 RRP15       | ribosomal RNA processing 15 homolog              | Multiple_Complex |
| TC0900012277.hg.1    | 5.48  | 5.96  | -1.4  | 0.0015 | 0.006 AK1         | adenylate kinase 1                               | Coding           |
| TC0X00008178.hg.1    | 3.73  | 3.23  | 1.41  | 0.0015 | 0.006 HTR2C       | 5-hydroxytryptamine (serotonin) receptor 2C      | Coding           |
| TC0500008654.hg.1    | 3.99  | 4.84  | -1.8  | 0.0015 | 0.006 LEAP2       | liver expressed antimicrobial peptide 2          | Multiple_Complex |
| TC1900007891.hg.1    | 9.54  | 10.98 | -2.71 | 0.0015 | 0.006 HCST        | hematopoietic cell signal transducer             | Multiple_Complex |
| TC0100006801.hg.1    | 5.98  | 5.27  | 1.64  | 0.0015 | 0.006 NNMAT1      | nicotinamide nucleotide adenyltransferase 1      | Multiple_Complex |
| TC1200009103.hg.1    | 9.29  | 9.86  | -1.48 | 0.0015 | 0.006 PRKAB1      | protein kinase, AMP-activated, beta 1 non-cat    | Multiple_Complex |
| TC1700007897.hg.1    | 5.91  | 6.61  | -1.63 | 0.0015 | 0.006 HSD17B1     | hydroxysteroid (17-beta) dehydrogenase 1         | Multiple_Complex |
| TC1600007575.hg.1    | 4     | 3.41  | 1.5   | 0.0015 | 0.006 TP53TG3D    | TP53 target 3D                                   | Multiple_Complex |
| TC2000006694.hg.1    | 6.46  | 7.35  | -1.86 | 0.0015 | 0.006 SLX4IP      | SLX4 interacting protein                         | Multiple_Complex |
| TC0800012444.hg.1    | 11.31 | 12.77 | -2.76 | 0.0015 | 0.006 PABPC1; M   | poly(A) binding protein, cytoplasmic 1; microf   | Multiple_Complex |
| TC0800008478.hg.1    | 3.51  | 4.44  | -1.91 | 0.0015 | 0.006 FZD6        | frizzled class receptor 6                        | Coding           |
| TC1100008139.hg.1    | 6.64  | 7.49  | -1.8  | 0.0015 | 0.006 AIP         | aryl hydrocarbon receptor interacting protein    | Multiple_Complex |
| TC1100010254.hg.1    | 4.95  | 5.51  | -1.48 | 0.0015 | 0.006 SAAL1       | serum amyloid A-like 1                           | Multiple_Complex |
| TC1100008039.hg.1    | 6.43  | 7.03  | -1.52 | 0.0015 | 0.0061 MUS81      | MUS81 structure-specific endonuclease subur      | Multiple_Complex |
| TC1200007764.hg.1    | 8.01  | 9.13  | -2.17 | 0.0015 | 0.0061 ZNF385A    | Memczak2013 ANTISENSE, CDS, coding, INTEF        | NonCoding        |
| TC0800006566.hg.1    | 6.26  | 7.24  | -1.97 | 0.0015 | 0.0061 AGPAT5     | 1-acylglycerol-3-phosphate O-acyltransferase     | Multiple_Complex |
| TC1100010261.hg.1    | 7.31  | 7.65  | -1.27 | 0.0015 | 0.0061 HP55       | Hermansky-Pudlak syndrome 5                      | Multiple_Complex |
| TC0100018489.hg.1    | 5.61  | 6.51  | -1.87 | 0.0015 | 0.0061 VPS72      | vacuolar protein sorting 72 homolog (S. cerevi   | Multiple_Complex |
| TC1600006656.hg.1    | 8.44  | 7.38  | 2.08  | 0.0015 | 0.0061 MMP25      | matrix metalloproteinase 25                      | Multiple_Complex |
| TC0100015764.hg.1    | 8.04  | 7.37  | 1.59  | 0.0015 | 0.0061 FAM63A     | family with sequence similarity 63, member A     | Multiple_Complex |
| TC1600009351.hg.1    | 4.75  | 4.22  | 1.45  | 0.0015 | 0.0061 GRIN2A     | Transcript Identified by AceView, Entrez Gene    | Unassigned       |
| TC0900007113.hg.1    | 5.27  | 5.88  | -1.53 | 0.0015 | 0.0061 RECK       | reversion-inducing-cysteine-rich protein with    | Multiple_Complex |
| TC1200012640.hg.1    | 11.04 | 9.8   | 2.37  | 0.0015 | 0.0062 BLOC1S1    | biogenesis of lysosomal organelles complex-1     | Multiple_Complex |
| TC0800006963.hg.1    | 9.26  | 10.12 | -1.81 | 0.0015 | 0.0062 XPO7       | exportin 7                                       | Multiple_Complex |
| TC1100011101.hg.1    | 9.49  | 8.89  | 1.51  | 0.0015 | 0.0062 NXF1       | nuclear RNA export factor 1                      | Multiple_Complex |
| TC0200009350.hg.1    | 3.94  | 5.09  | -2.23 | 0.0016 | 0.0062 C2orf27A   | chromosome 2 open reading frame 27A              | Multiple_Complex |
| TC0200013063.hg.1    | 4.68  | 4.08  | 1.51  | 0.0016 | 0.0062 EGR4       | early growth response 4                          | Coding           |
| TC0400011192.hg.1    | 14.05 | 15.16 | -2.17 | 0.0016 | 0.0062 PLAC8      | placenta specific 8                              | Multiple_Complex |
| TC1000012513.hg.1    | 6.17  | 6.86  | -1.6  | 0.0016 | 0.0062 MTG1       | mitochondrial ribosome-associated GTPase 1       | Multiple_Complex |
| TC0700008582.hg.1    | 4.89  | 4.46  | 1.35  | 0.0016 | 0.0062 SERPINE1   | serpin peptidase inhibitor, clade E (nexin, plas | Multiple_Complex |
| TC1300008443.hg.1    | 4.91  | 5.46  | -1.47 | 0.0016 | 0.0062 LNX2       | ligand of numb-protein X 2                       | Multiple_Complex |
| TC1700011055.hg.1    | 6.32  | 6.91  | -1.5  | 0.0016 | 0.0062 SPOP       | speckle-type POZ protein                         | Multiple_Complex |
| TC0100008061.hg.1    | 8.71  | 9.11  | -1.33 | 0.0016 | 0.0063 SZT2       | seizure threshold 2 homolog (mouse)              | Multiple_Complex |
| TC0X00008344.hg.1    | 7.81  | 8.38  | -1.48 | 0.0016 | 0.0063 SH2D1A     | SH2 domain containing 1A                         | Multiple_Complex |
| TC0100018534.hg.1    | 4.96  | 4.51  | 1.37  | 0.0016 | 0.0063 TNR        | tenascin R                                       | Multiple_Complex |
| TC1300009348.hg.1    | 4.65  | 4.18  | 1.38  | 0.0016 | 0.0063 SPRY2      | sprouty RTK signaling antagonist 2               | Coding           |
| TC1200008517.hg.1    | 6.76  | 6.2   | 1.48  | 0.0016 | 0.0063 METAP2     | methionyl aminopeptidase 2                       | Multiple_Complex |
| TC0400006591.hg.1    | 8     | 8.59  | -1.51 | 0.0016 | 0.0063 HTT        | huntingtin                                       | Multiple_Complex |
| TSUnmapped00000667.h | 7.15  | 6.33  | 1.76  | 0.0016 | 0.0063 TRAPPC4    | trafficking protein particle complex 4           | NonCoding        |
| TC0100009479.hg.1    | 5.61  | 6.35  | -1.67 | 0.0016 | 0.0063 DCLRE1B    | DNA cross-link repair 1B                         | Multiple_Complex |
| TC1800009279.hg.1    | 6.08  | 5.71  | 1.29  | 0.0016 | 0.0063 TCEB3CL; T | transcription elongation factor B polypeptide    | Coding           |
| TC2100008545.hg.1    | 8.77  | 8.29  | 1.4   | 0.0016 | 0.0063 NRIP1      | nuclear receptor interacting protein 1           | Multiple_Complex |
| TSUnmapped00000270.h | 7.52  | 6.95  | 1.49  | 0.0016 | 0.0063 TRAPPC4    | trafficking protein particle complex 4           | Coding           |
| TC0100009646.hg.1    | 10.93 | 10.06 | 1.83  | 0.0016 | 0.0063 NBPF26     | neuroblastoma breakpoint family, member 26       | Coding           |
| TC1100011811.hg.1    | 9.64  | 8.7   | 1.92  | 0.0016 | 0.0063 CCDC90B    | coiled-coil domain containing 90B                | Multiple_Complex |
| TC1100012834.hg.1    | 5.43  | 4.92  | 1.43  | 0.0016 | 0.0063 ADAMTS8    | ADAM metalloproteinase with thrombospondin       | Multiple_Complex |
| TC1100010091.hg.1    | 6.95  | 6.37  | 1.5   | 0.0016 | 0.0063 MRV1       | murine retrovirus integration site 1 homolog     | Multiple_Complex |

|                       |       |       |       |        |        |             |                                                  |                  |
|-----------------------|-------|-------|-------|--------|--------|-------------|--------------------------------------------------|------------------|
| TC0900012245.hg.1     | 5.93  | 6.75  | -1.76 | 0.0016 | 0.0064 | ALDH1A1     | aldehyde dehydrogenase 1 family, member A        | Multiple_Complex |
| TSUnmapped00000380.h  | 8.9   | 9.47  | -1.49 | 0.0016 | 0.0064 | FBL         | fibrillarlin                                     | Coding           |
| TC1100011259.hg.1     | 5.45  | 4.71  | 1.68  | 0.0016 | 0.0064 | FOSL1       | FOS-like antigen 1                               | Multiple_Complex |
| TC1800008482.hg.1     | 9.35  | 10.15 | -1.75 | 0.0016 | 0.0064 | TPGS2       | tubulin polyglutamylase complex subunit 2        | Multiple_Complex |
| TC0300010185.hg.1     | 5.54  | 5.09  | 1.37  | 0.0016 | 0.0064 | OXTR        | oxytocin receptor                                | Multiple_Complex |
| TC0600007198.hg.1     | 6.81  | 7.35  | -1.45 | 0.0016 | 0.0064 | ALDH5A1     | aldehyde dehydrogenase 5 family, member A        | Multiple_Complex |
| TC1400007232.hg.1     | 7.53  | 7.12  | 1.32  | 0.0016 | 0.0064 | FBXO34      | F-box protein 34                                 | Multiple_Complex |
| TC0100013042.hg.1     | 4.74  | 4.28  | 1.38  | 0.0016 | 0.0064 | SPATA21     | spermatogenesis associated 21                    | Multiple_Complex |
| TC0200007419.hg.1     | 5.81  | 6.67  | -1.82 | 0.0016 | 0.0064 | CAMKMT      | calmodulin-lysine N-methyltransferase            | Multiple_Complex |
| TC0800009247.hg.1     | 6.18  | 6.77  | -1.51 | 0.0016 | 0.0064 | HSF1        | heat shock transcription factor 1                | Multiple_Complex |
| TC1700012285.hg.1     | 7.17  | 8.02  | -1.8  | 0.0016 | 0.0065 | PRR11       | proline rich 11                                  | Multiple_Complex |
| TC1100009833.hg.1     | 4.95  | 5.46  | -1.42 | 0.0016 | 0.0065 | OSBPL5      | Memczak2013 ALT_ACCEPTOR, ALT_DONOR,             | NonCoding        |
| TC0300010744.hg.1     | 11.65 | 10.87 | 1.71  | 0.0016 | 0.0065 | ACAA1       | acetyl-CoA acyltransferase 1                     | Multiple_Complex |
| TC0200012009.hg.1     | 6.36  | 6.83  | -1.38 | 0.0016 | 0.0065 | DTNB        | dystrobrevin beta                                | Multiple_Complex |
| TC0300013947.hg.1     | 5.38  | 6.01  | -1.55 | 0.0016 | 0.0065 | COLQ        | collagen-like tail subunit (single strand of hom | Multiple_Complex |
| TC0100013038.hg.1     | 7.29  | 7.83  | -1.46 | 0.0016 | 0.0065 | FBXO42      | F-box protein 42                                 | Multiple_Complex |
| TC0100013441.hg.1     | 13.58 | 12.76 | 1.76  | 0.0016 | 0.0065 | FGR         | FGR proto-oncogene, Src family tyrosine kinas    | Multiple_Complex |
| TSUnmapped00000803.h  | 4.16  | 3.86  | 1.23  | 0.0017 | 0.0066 | OR5P3       | olfactory receptor, family 5, subfamily P, men   | Coding           |
| TC0400008922.hg.1     | 7.81  | 8.6   | -1.72 | 0.0017 | 0.0066 | LSM6        | LSM6 homolog, U6 small nuclear RNA and mR        | Multiple_Complex |
| TC1300008229.hg.1     | 9.15  | 8.5   | 1.57  | 0.0017 | 0.0066 | ZMYM5       | zinc finger, MYM-type 5                          | Multiple_Complex |
| TC0800006592.hg.1     | 3.94  | 3.41  | 1.45  | 0.0017 | 0.0066 | USP17L1     | ubiquitin specific peptidase 17-like family mer  | Coding           |
| TC0X00009707.hg.1     | 4.59  | 4.13  | 1.38  | 0.0017 | 0.0066 | MAGED4; M   | melanoma antigen family D4; melanoma anti        | Multiple_Complex |
| TC1800007186.hg.1     | 7.31  | 8.07  | -1.7  | 0.0017 | 0.0066 | SETBP1      | SET binding protein 1                            | Multiple_Complex |
| TC1100010730.hg.1     | 5.15  | 5.8   | -1.57 | 0.0017 | 0.0066 | ACP2        | acid phosphatase 2, lysosomal                    | Multiple_Complex |
| TC1400007029.hg.1     | 5.25  | 6.35  | -2.14 | 0.0017 | 0.0066 | C14orf28    | chromosome 14 open reading frame 28              | Multiple_Complex |
| TC1900010706.hg.1     | 6.39  | 5.78  | 1.53  | 0.0017 | 0.0066 | SERTAD1     | SERTA domain containing 1                        | Multiple_Complex |
| TC1100006704.hg.1     | 4.98  | 5.83  | -1.8  | 0.0017 | 0.0066 | OR52N4      | olfactory receptor, family 52, subfamily N, me   | Coding           |
| TC0600014247.hg.1     | 15.5  | 16.34 | -1.78 | 0.0017 | 0.0066 | FAM65B      | family with sequence similarity 65, member B     | Multiple_Complex |
| TC0100016263.hg.1     | 7.27  | 6.17  | 2.14  | 0.0017 | 0.0066 | TMCO1       | transmembrane and coiled-coil domains 1          | Multiple_Complex |
| TC0200015080.hg.1     | 7.01  | 7.71  | -1.63 | 0.0017 | 0.0066 | PRKRA       | protein kinase, interferon-inducible double str  | Multiple_Complex |
| TC0500008864.hg.1     | 7.22  | 7.96  | -1.67 | 0.0017 | 0.0066 | WDR55       | WD repeat domain 55                              | Multiple_Complex |
| TC1700010425.hg.1     | 7.3   | 8.04  | -1.66 | 0.0017 | 0.0067 | SLFN12      | schlafen family member 12                        | Multiple_Complex |
| TC1000012575.hg.1     | 8.99  | 9.6   | -1.53 | 0.0017 | 0.0067 | ATAD1       | ATPase family, AAA domain containing 1           | Multiple_Complex |
| TC0600006950.hg.1     | 7.26  | 6.73  | 1.44  | 0.0017 | 0.0067 | TMEM170E    | transmembrane protein 170B                       | Coding           |
| TC0800010749.hg.1     | 11.63 | 12.45 | -1.76 | 0.0017 | 0.0067 | NCOA2       | nuclear receptor coactivator 2                   | Multiple_Complex |
| TC0500013064.hg.1     | 7.13  | 6.46  | 1.59  | 0.0017 | 0.0067 | MGAT4B      | mannosyl (alpha-1,3-)-glycoprotein beta-1,4-N    | Multiple_Complex |
| TC0700008063.hg.1     | 6.15  | 6.79  | -1.56 | 0.0017 | 0.0067 | SPDYE5      | speedy/RINGO cell cycle regulator family men     | Coding           |
| TC0700009649.hg.1     | 6.19  | 5.63  | 1.47  | 0.0017 | 0.0067 | ATP6V0E2    | ATPase, H+ transporting V0 subunit e2            | Multiple_Complex |
| TC0400012931.hg.1     | 13.49 | 12.78 | 1.64  | 0.0017 | 0.0067 | G3BP2       | GTPase activating protein (SH3 domain) bindi     | Multiple_Complex |
| TC1400007430.hg.1     | 7.42  | 7.95  | -1.44 | 0.0017 | 0.0067 | SYNE2       | spectrin repeat containing, nuclear envelope     | Multiple_Complex |
| TC0100015976.hg.1     | 8.7   | 9.11  | -1.33 | 0.0017 | 0.0067 | KIAA0907; ; | KIAA0907; small Cajal body-specific RNA 4        | Multiple_Complex |
| TC1700011798.hg.1     | 6.63  | 7.46  | -1.78 | 0.0017 | 0.0067 | UBE2O       | ubiquitin-conjugating enzyme E2O                 | Multiple_Complex |
| TC0500009077.hg.1     | 6.4   | 7.01  | -1.52 | 0.0017 | 0.0067 | HMGXB3      | HMG box domain containing 3                      | Multiple_Complex |
| TC0X00008940.hg.1     | 5.09  | 4.59  | 1.42  | 0.0017 | 0.0067 | MXRA5       | matrix-remodelling associated 5                  | Coding           |
| TC1900010008.hg.1     | 6.81  | 7.48  | -1.59 | 0.0017 | 0.0067 | KIAA1683    | KIAA1683                                         | Multiple_Complex |
| TC1900009692.hg.1     | 7.08  | 6.52  | 1.48  | 0.0017 | 0.0067 | ZNF823      | zinc finger protein 823                          | Multiple_Complex |
| TC1000008579.hg.1     | 8.75  | 7.82  | 1.91  | 0.0017 | 0.0067 | UBT1        | ubiquitin domain containing 1                    | Multiple_Complex |
| TC0400009322.hg.1     | 7.94  | 8.51  | -1.48 | 0.0017 | 0.0067 | GALNT7      | polypeptide N-acetylgalactosaminyltransferas     | Multiple_Complex |
| TC0200016545.hg.1     | 4.12  | 4.83  | -1.64 | 0.0017 | 0.0068 | RIF1        | replication timing regulatory factor 1           | NonCoding        |
| TC1_KI270713v1_random | 7.4   | 7.82  | -1.34 | 0.0017 | 0.0068 | FAM231A     | family with sequence similarity 231, member      | Coding           |
| TC0X00010005.hg.1     | 6.93  | 7.66  | -1.66 | 0.0017 | 0.0068 | CXCR3       | chemokine (C-X-C motif) receptor 3               | Coding           |
| TC1600011047.hg.1     | 5.79  | 5.59  | 1.14  | 0.0017 | 0.0068 | HSDL1       | hydroxysteroid dehydrogenase like 1              | Multiple_Complex |
| TC0700008011.hg.1     | 17.67 | 16.49 | 2.27  | 0.0017 | 0.0068 | NCF1        | neutrophil cytosolic factor 1                    | Multiple_Complex |
| TC0200016707.hg.1     | 4.86  | 5.37  | -1.42 | 0.0017 | 0.0068 | ZNF514      | zinc finger protein 514                          | Multiple_Complex |
| TC1100009078.hg.1     | 6.61  | 7.18  | -1.49 | 0.0017 | 0.0068 | TTC12       | tetratricopeptide repeat domain 12               | Multiple_Complex |
| TSUnmapped00000306.h  | 4.31  | 4.9   | -1.51 | 0.0017 | 0.0068 | ZKSCAN7     | zinc finger with KRAB and SCAN domains 7         | Coding           |
| TC0100018478.hg.1     | 11.84 | 10.96 | 1.83  | 0.0017 | 0.0068 | NBPF10      | neuroblastoma breakpoint family, member 10       | Multiple_Complex |
| TC1700010461.hg.1     | 6.19  | 5.32  | 1.83  | 0.0017 | 0.0068 | CCL3L3; CC  | chemokine (C-C motif) ligand 3-like 3; chemok    | Multiple_Complex |
| TC0X00009498.hg.1     | 6.02  | 5.38  | 1.56  | 0.0017 | 0.0068 | FUNDC1      | FUN14 domain containing 1                        | Multiple_Complex |
| TC0600007693.hg.1     | 13.62 | 12.42 | 2.3   | 0.0017 | 0.0068 | RPS18       | ribosomal protein S18                            | Multiple_Complex |
| TC0900010388.hg.1     | 10.29 | 9.13  | 2.22  | 0.0017 | 0.0068 | TMEM2       | Transcript Identified by AceView, Entrez Gene    | Unassigned       |
| TC1700008661.hg.1     | 5.59  | 6.17  | -1.49 | 0.0017 | 0.0068 | PRKCA       | protein kinase C, alpha                          | Multiple_Complex |
| TC1900009192.hg.1     | 6.44  | 7.02  | -1.5  | 0.0017 | 0.0068 | ABHD17A     | abhydrolase domain containing 17A                | Multiple_Complex |
| TC0600008104.hg.1     | 3.76  | 3.4   | 1.29  | 0.0017 | 0.0068 | RSPH9       | radial spoke head 9 homolog (Chlamydomona        | Coding           |
| TC1700011205.hg.1     | 6.33  | 5.72  | 1.52  | 0.0017 | 0.0068 | C17orf67    | chromosome 17 open reading frame 67              | Multiple_Complex |
| TC1200012737.hg.1     | 4.96  | 5.78  | -1.76 | 0.0017 | 0.0069 | ZNF268      | zinc finger protein 268                          | Multiple_Complex |
| TC0300010390.hg.1     | 9.71  | 9.19  | 1.44  | 0.0017 | 0.0069 | RBSN        | rabenosyn, RAB effector                          | Multiple_Complex |
| TC0800011710.hg.1     | 7.38  | 6.51  | 1.84  | 0.0017 | 0.0069 | TATDN1; M   | TatD DNase domain containing 1; microRNA 6       | Multiple_Complex |
| TC0600007344.hg.1     | 4.28  | 3.88  | 1.32  | 0.0018 | 0.0069 | PRSS16      | protease, serine, 16 (thymus)                    | Multiple_Complex |
| TC1600007532.hg.1     | 4.86  | 4.36  | 1.41  | 0.0018 | 0.0069 | ITGAD       | integrin alpha D                                 | Multiple_Complex |

|                      |       |       |        |        |                  |                                                                       |
|----------------------|-------|-------|--------|--------|------------------|-----------------------------------------------------------------------|
| TC0200008224.hg.1    | 6.03  | 5.5   | 1.44   | 0.0018 | 0.0069 DNAH6     | Transcript Identified by AceView, Entrez Gene Unassigned              |
| TC1400009766.hg.1    | 6.61  | 5.49  | 2.17   | 0.0018 | 0.0069 IRF2BPL   | interferon regulatory factor 2 binding protein- Multiple_Complex      |
| TC1900009249.hg.1    | 9.45  | 8.71  | 1.68   | 0.0018 | 0.0069 GNG7      | Memczak2013 ALT_ACCEPTOR, ALT_DONOR, NonCoding                        |
| TC2200009161.hg.1    | 6.39  | 6.74  | -1.27  | 0.0018 | 0.0069 LMF2      | lipase maturation factor 2 Multiple_Complex                           |
| TC0200008285.hg.1    | 7.21  | 7.68  | -1.39  | 0.0018 | 0.0069 MRPL35    | mitochondrial ribosomal protein L35 Multiple_Complex                  |
| TC0600009406.hg.1    | 4.32  | 3.64  | 1.61   | 0.0018 | 0.0069 C6orf58   | chromosome 6 open reading frame 58 Multiple_Complex                   |
| TC0900012021.hg.1    | 7.33  | 8.12  | -1.72  | 0.0018 | 0.007 FBXW5      | F-box and WD repeat domain containing 5 Multiple_Complex              |
| TC1400010634.hg.1    | 5.27  | 5.72  | -1.37  | 0.0018 | 0.007 CIPC       | CLOCK-interacting pacemaker Multiple_Complex                          |
| TC1700012349.hg.1    | 5.96  | 5.46  | 1.41   | 0.0018 | 0.007 NAA38      | N(alpha)-acetyltransferase 38, NatC auxiliary s Multiple_Complex      |
| TC1100011614.hg.1    | 5.42  | 6.24  | -1.77  | 0.0018 | 0.007 KCNE3      | potassium channel, voltage gated subfamily E Coding                   |
| TC0200006891.hg.1    | 8.05  | 9.02  | -1.97  | 0.0018 | 0.007 RHOB       | ras homolog family member B Coding                                    |
| TC0200016739.hg.1    | 4.64  | 5.41  | -1.7   | 0.0018 | 0.007 ARL5A      | ADP-ribosylation factor like GTPase 5A NonCoding                      |
| TC0600011562.hg.1    | 7.57  | 8.12  | -1.47  | 0.0018 | 0.007 LEMD2      | LEM domain containing 2 Multiple_Complex                              |
| TC0700006484.hg.1    | 5.48  | 6.13  | -1.56  | 0.0018 | 0.007 GPR146     | G protein-coupled receptor 146 Multiple_Complex                       |
| TC0X00009250.hg.1    | 9.18  | 8.3   | 1.84   | 0.0018 | 0.007 ACOT9      | acyl-CoA thioesterase 9 Multiple_Complex                              |
| TC0300011731.hg.1    | 11.97 | 12.43 | -1.37  | 0.0018 | 0.007 CGGBP1     | CGG triplet repeat binding protein 1 Multiple_Complex                 |
| TC0100006982.hg.1    | 12.57 | 11.95 | 1.55   | 0.0018 | 0.007 EFHD2      | EF-hand domain family member D2 Coding                                |
| TC0600012495.hg.1    | 5.98  | 5.3   | 1.59   | 0.0018 | 0.007 CGA        | glycoprotein hormones, alpha polypeptide Multiple_Complex             |
| TC0100018481.hg.1    | 9.08  | 8.47  | 1.52   | 0.0018 | 0.0071 NOTCH2NL  | notch 2 N-terminal like Coding                                        |
| TC0600009753.hg.1    | 9.89  | 8.88  | 2.01   | 0.0018 | 0.0071 STXBP5    | syntaxin binding protein 5 (tomosyn) Multiple_Complex                 |
| TC1900010696.hg.1    | 7.84  | 8.87  | -2.04  | 0.0018 | 0.0071 AKT2      | v-akt murine thymoma viral oncogene homolog Multiple_Complex          |
| TC1200009528.hg.1    | 6     | 6.64  | -1.56  | 0.0018 | 0.0071 ZNF140    | zinc finger protein 140 Multiple_Complex                              |
| TC1900011798.hg.1    | 7.92  | 8.86  | -1.92  | 0.0018 | 0.0071 LILRA1    | leukocyte immunoglobulin-like receptor, subfamily Multiple_Complex    |
| TC1700012094.hg.1    | 4.63  | 4.07  | 1.48   | 0.0018 | 0.0071 CCDC57    | coiled-coil domain containing 57 Multiple_Complex                     |
| TC1400007725.hg.1    | 5.19  | 4.64  | 1.47   | 0.0018 | 0.0071 ESRRB     | estrogen-related receptor beta Multiple_Complex                       |
| TC0100015791.hg.1    | 5.56  | 4.28  | 2.42   | 0.0018 | 0.0071 POGZ      | Transcript Identified by AceView, Entrez Gene Unassigned              |
| TC1100012002.hg.1    | 7.75  | 8.57  | -1.78  | 0.0018 | 0.0071 MRE11A    | MRE11 homolog A, double strand break repair Multiple_Complex          |
| TC0500012023.hg.1    | 4.6   | 5.24  | -1.56  | 0.0018 | 0.0071 KIF3A     | kinesin family member 3A Multiple_Complex                             |
| TC0200009095.hg.1    | 4.68  | 4.25  | 1.35   | 0.0018 | 0.0071 INHBB     | inhibin beta B Coding                                                 |
| TC2000007994.hg.1    | 4.92  | 5.23  | -1.24  | 0.0018 | 0.0071 MTG2      | mitochondrial ribosome-associated GTPase 2 Multiple_Complex           |
| TC1600007504.hg.1    | 7.27  | 8.06  | -1.73  | 0.0018 | 0.0071 SETD1A    | SET domain containing 1A Multiple_Complex                             |
| TC0100015795.hg.1    | 7.62  | 6.71  | 1.88   | 0.0018 | 0.0071 POGZ      | Transcript Identified by AceView, Entrez Gene Unassigned              |
| TC0800012245.hg.1    | 6.09  | 6.57  | -1.4   | 0.0018 | 0.0072 ZNF250    | zinc finger protein 250 Multiple_Complex                              |
| TC1900010005.hg.1    | 5     | 4.59  | 1.33   | 0.0018 | 0.0072 RAB3A     | RAB3A, member RAS oncogene family Multiple_Complex                    |
| TC0X00009339.hg.1    | 10.24 | 10.7  | -1.38  | 0.0018 | 0.0072 TAB3      | TGF-beta activated kinase 1/MAP3K7 binding Multiple_Complex           |
| TC1400009842.hg.1    | 11.97 | 11.15 | 1.78   | 0.0018 | 0.0072 SEL1L     | sel-1 suppressor of lin-12-like (C. elegans) Multiple_Complex         |
| TSUnmapped00000742.h | 6.01  | 6.47  | -1.37  | 0.0018 | 0.0072 ZNF852    | zinc finger protein 852 Coding                                        |
| TC1000008063.hg.1    | 7.17  | 7.79  | -1.54  | 0.0018 | 0.0072 ADK; MRPL | adenosine kinase; mitochondrial ribosomal protein Multiple_Complex    |
| TC1100010738.hg.1    | 6.49  | 5.9   | 1.51   | 0.0018 | 0.0072 PSMC3     | proteasome 26S subunit, ATPase 3 Multiple_Complex                     |
| TC2000007448.hg.1    | 5.51  | 4.97  | 1.46   | 0.0018 | 0.0072 GDAP1L1   | ganglioside induced differentiation associated Multiple_Complex       |
| TC1100008804.hg.1    | 7.78  | 6.41  | 2.6    | 0.0018 | 0.0072 ANKRD49   | ankyrin repeat domain 49 Multiple_Complex                             |
| TC0500013358.hg.1    | 12.55 | 11.53 | 2.03   | 0.0018 | 0.0072 SKP1      | S-phase kinase-associated protein 1 Multiple_Complex                  |
| TC1900008059.hg.1    | 10.76 | 10.07 | 1.61   | 0.0019 | 0.0072 SUPT5H    | SPT5 homolog, DSIF elongation factor subunit Multiple_Complex         |
| TC1400010632.hg.1    | 10.03 | 9.65  | 1.31   | 0.0019 | 0.0072 GPATCH2L  | G-patch domain containing 2 like Multiple_Complex                     |
| TC1600011398.hg.1    | 5.09  | 4.35  | 1.67   | 0.0019 | 0.0072 MMP2      | matrix metalloproteinase 2 Multiple_Complex                           |
| TC1800008609.hg.1    | 5.56  | 5.21  | 1.27   | 0.0019 | 0.0073 TCEB3C    | transcription elongation factor B polypeptide : Coding                |
| TC0600007833.hg.1    | 7.19  | 5.99  | 2.3    | 0.0019 | 0.0073 PNPLA1    | patatin-like phospholipase domain containing Coding                   |
| TC0300008863.hg.1    | 14.48 | 13.71 | 1.71   | 0.0019 | 0.0073 CDV3      | CDV3 homolog (mouse) Multiple_Complex                                 |
| TC0600009094.hg.1    | 7.07  | 6.55  | 1.44   | 0.0019 | 0.0073 SMPD2     | sphingomyelin phosphodiesterase 2, neutral r Multiple_Complex         |
| TC0900008865.hg.1    | 4.92  | 5.45  | -1.44  | 0.0019 | 0.0073 CERCAM    | cerebral endothelial cell adhesion molecule Multiple_Complex          |
| TC0200013552.hg.1    | 3.87  | 4.13  | -1.2   | 0.0019 | 0.0073 FAHD2B    | fumarylacetoacetate hydrolase domain contain Multiple_Complex         |
| TC1500009728.hg.1    | 6.95  | 5.96  | 1.98   | 0.0019 | 0.0073 DAPK2     | death-associated protein kinase 2 Multiple_Complex                    |
| TC1400008056.hg.1    | 7.1   | 10.81 | -13.07 | 0.0019 | 0.0073 IFI27     | interferon, alpha-inducible protein 27 Multiple_Complex               |
| TC0500012302.hg.1    | 4     | 4.36  | -1.29  | 0.0019 | 0.0074 GNPDA1    | glucosamine-6-phosphate deaminase 1 Multiple_Complex                  |
| TC1900011839.hg.1    | 4.02  | 3.48  | 1.46   | 0.0019 | 0.0074 JSRP1     | junctional sarcoplasmic reticulum protein 1 NonCoding                 |
| TC0700008743.hg.1    | 11.59 | 12.28 | -1.62  | 0.0019 | 0.0074 PIK3CG    | phosphatidylinositol-4,5-bisphosphate 3-kinase Multiple_Complex       |
| TC0400010085.hg.1    | 10.86 | 9.99  | 1.83   | 0.0019 | 0.0074 BOD1L1    | bioorientation of chromosomes in cell division Multiple_Complex       |
| TC1700007326.hg.1    | 4.9   | 4.44  | 1.37   | 0.0019 | 0.0074 TBC1D3P5  | TBC1 domain family, member 3 pseudogene 5 Multiple_Complex            |
| TC0100010486.hg.1    | 5.32  | 5.84  | -1.44  | 0.0019 | 0.0074 POGK      | pogo transposable element with KRAB domain Coding                     |
| TC1500007004.hg.1    | 11.2  | 10.39 | 1.76   | 0.0019 | 0.0074 RTF1      | RTF1 homolog, Paf1/RNA polymerase II complex Multiple_Complex         |
| TC0800012147.hg.1    | 9.02  | 9.46  | -1.36  | 0.0019 | 0.0074 TSTA3     | tissue specific transplantation antigen P35B Multiple_Complex         |
| TC2200008866.hg.1    | 8.1   | 8.32  | -1.17  | 0.0019 | 0.0074 TCF20     | transcription factor 20 (AR1) Multiple_Complex                        |
| TC0X00009493.hg.1    | 5.68  | 4.78  | 1.87   | 0.0019 | 0.0074 EFHC2     | EF-hand domain (C-terminal) containing 2 Multiple_Complex             |
| TC1100012713.hg.1    | 5.19  | 4.65  | 1.45   | 0.0019 | 0.0074 PATE2     | prostate and testis expressed 2 Coding                                |
| TC1400006711.hg.1    | 4.8   | 5.32  | -1.44  | 0.0019 | 0.0074 DHRS4L1   | dehydrogenase/reductase (SDR family) member Multiple_Complex          |
| TC1400009793.hg.1    | 8.94  | 8.3   | 1.56   | 0.0019 | 0.0074 SNW1      | SNW domain containing 1 Multiple_Complex                              |
| TC0600013004.hg.1    | 8.84  | 9.22  | -1.3   | 0.0019 | 0.0074 MCM9      | minichromosome maintenance 9 homologous Multiple_Complex              |
| TC1100011118.hg.1    | 5.1   | 4.61  | 1.41   | 0.0019 | 0.0074 SLC22A25  | solute carrier family 22, member 25 Multiple_Complex                  |
| TC0600010056.hg.1    | 12.33 | 11.57 | 1.69   | 0.0019 | 0.0075 WTAP      | Wilms tumor 1 associated protein Multiple_Complex                     |
| TC1700010191.hg.1    | 7.6   | 8.08  | -1.4   | 0.0019 | 0.0075 POLDIP2   | polymerase (DNA-directed), delta interacting protein Multiple_Complex |

|                      |       |       |       |        |        |            |                                                    |                  |
|----------------------|-------|-------|-------|--------|--------|------------|----------------------------------------------------|------------------|
| TC0100007505.hg.1    | 9.91  | 10.61 | -1.62 | 0.0019 | 0.0075 | WDT C1     | WD and tetratricopeptide repeats 1                 | Multiple_Complex |
| TC0100007813.hg.1    | 5.6   | 4.43  | 2.25  | 0.0019 | 0.0075 | CSF3R      | Memczak2013 ANTISENSE, CDS, coding, INTEF          | NonCoding        |
| TC0600007842.hg.1    | 10.29 | 9.59  | 1.62  | 0.0019 | 0.0075 | SRSF3      | serine/arginine-rich splicing factor 3             | Multiple_Complex |
| TC1000007888.hg.1    | 11.05 | 10.24 | 1.75  | 0.0019 | 0.0075 | VPS26A     | VPS26 retromer complex component A                 | Multiple_Complex |
| TC0800010158.hg.1    | 7.25  | 7.71  | -1.37 | 0.0019 | 0.0075 | PLPP5      | phospholipid phosphatase 5                         | Multiple_Complex |
| TC1200011519.hg.1    | 7.28  | 8     | -1.65 | 0.0019 | 0.0075 | EEA1       | early endosome antigen 1                           | Multiple_Complex |
| TC1900008608.hg.1    | 5.79  | 5.22  | 1.49  | 0.0019 | 0.0075 | KLK2       | kallikrein related peptidase 2                     | Multiple_Complex |
| TC0300010632.hg.1    | 6.43  | 7.23  | -1.75 | 0.002  | 0.0076 | OSBPL10    | oxysterol binding protein-like 10                  | Multiple_Complex |
| TC1800009086.hg.1    | 8.91  | 7.78  | 2.19  | 0.002  | 0.0076 | ZNF516     | zinc finger protein 516                            | Multiple_Complex |
| TC1600008924.hg.1    | 7.1   | 7.41  | -1.24 | 0.002  | 0.0076 | POLR3K     | polymerase (RNA) III (DNA directed) polypeptide    | Multiple_Complex |
| TC0100018344.hg.1    | 9.5   | 9.96  | -1.38 | 0.002  | 0.0076 | LYPLAL1    | lysophospholipase-like 1                           | Multiple_Complex |
| TC1400008921.hg.1    | 11.14 | 10.25 | 1.84  | 0.002  | 0.0076 | BAZ1A      | bromodomain adjacent to zinc finger domain         | Multiple_Complex |
| TC0300013827.hg.1    | 4.32  | 5.19  | -1.83 | 0.002  | 0.0076 | WDR6       | WD repeat domain 6                                 | Multiple_Complex |
| TC0X00011279.hg.1    | 5     | 5.57  | -1.48 | 0.002  | 0.0076 | TSPAN7     | tetraspanin 7                                      | Multiple_Complex |
| TSUnmapped00000333.h | 9.94  | 10.73 | -1.72 | 0.002  | 0.0076 | SURF4      | surfeit 4                                          | Coding           |
| TC1700007454.hg.1    | 11.24 | 11.53 | -1.22 | 0.002  | 0.0077 | GOSR1      | golgi SNAP receptor complex member 1               | Multiple_Complex |
| TC0X00009537.hg.1    | 6.75  | 7.32  | -1.48 | 0.002  | 0.0077 | ZNF674     | zinc finger protein 674                            | Multiple_Complex |
| TC0X00007369.hg.1    | 5.09  | 5.44  | -1.27 | 0.002  | 0.0077 | APEX2      | APEX nuclease (apurinic/apyrimidinic endonuclease) | Multiple_Complex |
| TC1700009504.hg.1    | 6.94  | 7.78  | -1.79 | 0.002  | 0.0077 | ANKFY1     | ankyrin repeat and FYVE domain containing 1        | Multiple_Complex |
| TC0600010542.hg.1    | 8.64  | 8     | 1.56  | 0.002  | 0.0077 | SERPINB6   | serpin peptidase inhibitor, clade B (ovalbumin)    | Multiple_Complex |
| TC2000006818.hg.1    | 5.47  | 6.24  | -1.7  | 0.002  | 0.0077 | PET117; CS | PET117 homolog; CSRP2 binding protein              | Multiple_Complex |
| TC0600010307.hg.1    | 5.48  | 6.11  | -1.54 | 0.002  | 0.0077 | ERMARD     | ER membrane-associated RNA degradation             | Multiple_Complex |
| TC0100010112.hg.1    | 6.78  | 6.18  | 1.52  | 0.002  | 0.0077 | SLC50A1    | solute carrier family 50 (sugar efflux transport)  | Multiple_Complex |
| TC0900011864.hg.1    | 4.92  | 5.81  | -1.86 | 0.002  | 0.0077 | VAV2       | vav 2 guanine nucleotide exchange factor           | Multiple_Complex |
| TC1100013091.hg.1    | 8.25  | 8.48  | -1.17 | 0.002  | 0.0077 | SDHD       | succinate dehydrogenase complex subunit D,         | Multiple_Complex |
| TC2000009588.hg.1    | 7.18  | 6.62  | 1.47  | 0.002  | 0.0077 | MTRNR2L3   | MT-RNR2-like 3                                     | Coding           |
| TC1600006733.hg.1    | 4.15  | 3.9   | 1.19  | 0.002  | 0.0077 | GLIS2      | GLIS family zinc finger 2                          | Multiple_Complex |
| TC0400009198.hg.1    | 5.07  | 4.48  | 1.51  | 0.002  | 0.0077 | APELA      | apelin receptor early endogenous ligand            | Multiple_Complex |
| TC1400010580.hg.1    | 8.9   | 9.35  | -1.37 | 0.002  | 0.0078 | DHRS4L2    | dehydrogenase/reductase (SDR family) memb          | Multiple_Complex |
| TC0200015964.hg.1    | 6.59  | 5.81  | 1.71  | 0.002  | 0.0078 | TRIP12     | Transcript Identified by AceView, Entrez Gene      | Unassigned       |
| TC1500010784.hg.1    | 7.27  | 7.75  | -1.39 | 0.002  | 0.0078 | NGRN; TTL  | neugrin, neurite outgrowth associated; tubulin     | Multiple_Complex |
| TC1100009896.hg.1    | 5.44  | 4.8   | 1.55  | 0.002  | 0.0078 | OR51S1     | olfactory receptor, family 51, subfamily S, me     | Coding           |
| TC0500009409.hg.1    | 7.29  | 6.6   | 1.61  | 0.002  | 0.0079 | GABRP      | gamma-aminobutyric acid (GABA) A receptor,         | Multiple_Complex |
| TC1400007222.hg.1    | 10.57 | 11.25 | -1.6  | 0.002  | 0.0079 | MAPK1IP1   | mitogen-activated protein kinase 1 interacting     | Multiple_Complex |
| TC0900012202.hg.1    | 9.37  | 10.01 | -1.56 | 0.002  | 0.0079 | KIAA2026   | KIAA2026                                           | Multiple_Complex |
| TC0200009662.hg.1    | 10.27 | 9.07  | 2.3   | 0.002  | 0.0079 | TNF AIP6   | tumor necrosis factor, alpha-induced protein 6     | Multiple_Complex |
| TC0400008803.hg.1    | 9.97  | 9.08  | 1.85  | 0.002  | 0.0079 | RAB33B     | RAB33B, member RAS oncogene family                 | Multiple_Complex |
| TC0X00010734.hg.1    | 6.04  | 4.6   | 2.72  | 0.002  | 0.0079 | TENM1      | teneurin transmembrane protein 1                   | Multiple_Complex |
| TC1100010996.hg.1    | 13.02 | 12.03 | 1.99  | 0.002  | 0.0079 | MS4A6A     | membrane-spanning 4-domains, subfamily A,          | Multiple_Complex |
| TC1000010070.hg.1    | 6.7   | 5.87  | 1.77  | 0.0021 | 0.0079 | PRTFDC1    | phosphoribosyl transferase domain containing       | Multiple_Complex |
| TC0700013231.hg.1    | 5.57  | 5.31  | 1.2   | 0.0021 | 0.0079 | MNX1       | motor neuron and pancreas homeobox 1               | Multiple_Complex |
| TC0800012026.hg.1    | 5.8   | 7.02  | -2.33 | 0.0021 | 0.0079 | SLC45A4    | solute carrier family 45, member 4                 | Multiple_Complex |
| TC0900008148.hg.1    | 8.86  | 10.1  | -2.36 | 0.0021 | 0.0079 | TDRD7      | tudor domain containing 7                          | Multiple_Complex |
| TC0100010234.hg.1    | 6.4   | 5.86  | 1.45  | 0.0021 | 0.008  | OR10R2     | olfactory receptor, family 10, subfamily R, me     | Coding           |
| TC1900011887.hg.1    | 7.76  | 8.26  | -1.41 | 0.0021 | 0.008  | ZNF490     | zinc finger protein 490                            | Multiple_Complex |
| TC1500007318.hg.1    | 4.79  | 4.07  | 1.65  | 0.0021 | 0.008  | TEX9       | testis expressed 9                                 | Multiple_Complex |
| TC1700011949.hg.1    | 5     | 5.42  | -1.34 | 0.0021 | 0.008  | CBX8       | chromobox homolog 8                                | Multiple_Complex |
| TC0600012199.hg.1    | 4.97  | 4.51  | 1.38  | 0.0021 | 0.008  | EYS        | eyes shut homolog (Drosophila)                     | Multiple_Complex |
| TC0100009048.hg.1    | 7.96  | 7.02  | 1.92  | 0.0021 | 0.008  | RPL5       | Memczak2013 ALT_ACCEPTOR, ALT_DONOR,               | NonCoding        |
| TC0500007552.hg.1    | 8.64  | 7.94  | 1.62  | 0.0021 | 0.008  | LOC100421  | family with sequence similarity 133, member        | Multiple_Complex |
| TC2000009016.hg.1    | 6.74  | 7.43  | -1.62 | 0.0021 | 0.008  | DSN1       | DSN1 homolog, MIS12 kinetochore complex c          | Multiple_Complex |
| TC0100010241.hg.1    | 15.58 | 14.28 | 2.46  | 0.0021 | 0.008  | MNDA       | myeloid cell nuclear differentiation antigen       | Multiple_Complex |
| TC0500012204.hg.1    | 5.17  | 4.74  | 1.35  | 0.0021 | 0.008  | SLC23A1    | solute carrier family 23 (ascorbic acid transpor   | Multiple_Complex |
| TC0300013911.hg.1    | 8.73  | 8.06  | 1.59  | 0.0021 | 0.008  | DNAJB11    | DnaJ (Hsp40) homolog, subfamily B, member          | Multiple_Complex |
| TC1900011693.hg.1    | 7.3   | 6.74  | 1.48  | 0.0021 | 0.0081 | ZNF429     | zinc finger protein 429                            | Coding           |
| TC1000010993.hg.1    | 9.49  | 8.83  | 1.58  | 0.0021 | 0.0081 | MICU1      | mitochondrial calcium uptake 1                     | Multiple_Complex |
| TC0400010772.hg.1    | 5.51  | 4.66  | 1.8   | 0.0021 | 0.0081 | SRP72      | Memczak2013 ANTISENSE, coding, INTERNAL,           | NonCoding        |
| TC1200006629.hg.1    | 17.66 | 17.26 | 1.32  | 0.0021 | 0.0081 | GAPDH      | glyceraldehyde-3-phosphate dehydrogenase           | Multiple_Complex |
| TC0500009725.hg.1    | 8.37  | 9     | -1.55 | 0.0021 | 0.0081 | CNOT6      | CCR4-NOT transcription complex subunit 6           | Multiple_Complex |
| TC1400007691.hg.1    | 7.83  | 6.98  | 1.79  | 0.0021 | 0.0081 | DLST       | dihydroipoamide S-succinyltransferase (E2 co       | Multiple_Complex |
| TC1200008671.hg.1    | 7.43  | 8.33  | -1.86 | 0.0021 | 0.0081 | HCFC2      | host cell factor C2                                | Multiple_Complex |
| TC0400012795.hg.1    | 10.88 | 11.57 | -1.61 | 0.0021 | 0.0081 | FIP1L1     | factor interacting with PAPOLA and CPSF1           | Multiple_Complex |
| TC0300013215.hg.1    | 7.11  | 8.03  | -1.88 | 0.0021 | 0.0081 | TBL1XR1    | transducin (beta)-like 1 X-linked receptor 1       | Multiple_Complex |
| TC2000007005.hg.1    | 16.45 | 15.31 | 2.2   | 0.0021 | 0.0082 | CST7       | cystatin F (leukocystatin)                         | Coding           |
| TC0700009232.hg.1    | 8.96  | 10.06 | -2.15 | 0.0021 | 0.0082 | BPGM       | 2,3-bisphosphoglycerate mutase                     | Coding           |
| TC1400007098.hg.1    | 12.09 | 12.54 | -1.37 | 0.0021 | 0.0082 | ARF6       | ADP-ribosylation factor 6                          | Multiple_Complex |
| TC1200008370.hg.1    | 5.39  | 6.06  | -1.59 | 0.0021 | 0.0082 | C12orf29   | chromosome 12 open reading frame 29                | Multiple_Complex |
| TC0900007167.hg.1    | 7.57  | 8.19  | -1.54 | 0.0021 | 0.0082 | DCAF10     | DDB1 and CUL4 associated factor 10                 | Multiple_Complex |
| TC1900007732.hg.1    | 5.12  | 4.6   | 1.44  | 0.0021 | 0.0082 | THEG5; AC  | testis highly expressed protein 5; novel transc    | Multiple_Complex |
| TC0400009503.hg.1    | 5.36  | 6.01  | -1.57 | 0.0021 | 0.0082 | PRIMPOL    | primase and DNA directed polymerase                | Multiple_Complex |

|                      |       |       |       |        |        |            |                                                   |                  |
|----------------------|-------|-------|-------|--------|--------|------------|---------------------------------------------------|------------------|
| TC0500009470.hg.1    | 14.31 | 13.39 | 1.89  | 0.0021 | 0.0082 | ERGIC1     | endoplasmic reticulum-golgi intermediate con      | Multiple_Complex |
| TSUnmapped00000627.h | 4.91  | 4.3   | 1.53  | 0.0021 | 0.0082 | KIF15      | kinesin family member 15                          | Coding           |
| TC0400012768.hg.1    | 11.12 | 10.35 | 1.69  | 0.0021 | 0.0082 | FAM200B    | family with sequence similarity 200, member       | Multiple_Complex |
| TC0100013071.hg.1    | 4.02  | 3.72  | 1.23  | 0.0022 | 0.0082 | MFAP2      | microfibrillar associated protein 2               | Multiple_Complex |
| TC1200010569.hg.1    | 10.63 | 11.44 | -1.75 | 0.0022 | 0.0082 | ASB8       | ankyrin repeat and SOCS box containing 8          | Multiple_Complex |
| TC1600009224.hg.1    | 6.36  | 5.75  | 1.53  | 0.0022 | 0.0082 | CORO7; PA  | coronin 7; presequence translocase-associated     | Multiple_Complex |
| TC0100015805.hg.1    | 6.48  | 5.72  | 1.69  | 0.0022 | 0.0082 | CELF3      | CUGBP, Elav-like family member 3                  | Multiple_Complex |
| TC0700012479.hg.1    | 7.33  | 8.11  | -1.72 | 0.0022 | 0.0083 | POT1       | protection of telomeres 1                         | Multiple_Complex |
| TC1200012678.hg.1    | 4.63  | 3.94  | 1.62  | 0.0022 | 0.0083 | PTPRQ      | protein tyrosine phosphatase, receptor type, (    | Multiple_Complex |
| TC0300013931.hg.1    | 5.65  | 5.12  | 1.44  | 0.0022 | 0.0083 | SSUH2      | ssu-2 homolog (C. elegans)                        | NonCoding        |
| TC0100011388.hg.1    | 5.73  | 5.07  | 1.57  | 0.0022 | 0.0083 | IL19       | interleukin 19                                    | Multiple_Complex |
| TC0100013192.hg.1    | 6.46  | 6.18  | 1.21  | 0.0022 | 0.0083 | SH2D5      | SH2 domain containing 5                           | Multiple_Complex |
| TC1100012478.hg.1    | 6.39  | 7.58  | -2.28 | 0.0022 | 0.0083 | CD3D       | CD3d molecule, delta (CD3-TCR complex)            | Multiple_Complex |
| TC0300012449.hg.1    | 4.87  | 4.07  | 1.75  | 0.0022 | 0.0083 | CPNE4      | copine IV                                         | Multiple_Complex |
| TC1600011306.hg.1    | 5.8   | 5.35  | 1.36  | 0.0022 | 0.0083 | PRDM7      | PR domain containing 7                            | Multiple_Complex |
| TC1300006474.hg.1    | 5.73  | 6.45  | -1.65 | 0.0022 | 0.0083 | MPHOSPH8   | M-phase phosphoprotein 8                          | Multiple_Complex |
| TC0300006627.hg.1    | 5.54  | 6.11  | -1.48 | 0.0022 | 0.0084 | TSEN2      | TSEN2 tRNA splicing endonuclease subunit          | Multiple_Complex |
| TC1900008050.hg.1    | 5.07  | 4.52  | 1.46  | 0.0022 | 0.0084 | IFNL2      | interferon, lambda 2                              | Coding           |
| TC0600011674.hg.1    | 6.43  | 7.13  | -1.63 | 0.0022 | 0.0084 | PPIL1      | peptidylprolyl isomerase (cyclophilin)-like 1     | Multiple_Complex |
| TC2200007398.hg.1    | 6.38  | 7.06  | -1.6  | 0.0022 | 0.0084 | SYNGR1     | synaptogyrin 1                                    | Multiple_Complex |
| TC0100007486.hg.1    | 7.08  | 6.5   | 1.5   | 0.0022 | 0.0084 | SFN        | stratifin                                         | Coding           |
| TC0900012002.hg.1    | 6.14  | 5.59  | 1.46  | 0.0022 | 0.0084 | LCN8       | lipocalin 8                                       | Multiple_Complex |
| TC0X00010462.hg.1    | 5.92  | 6.54  | -1.53 | 0.0022 | 0.0084 | RBM41      | RNA binding motif protein 41                      | Multiple_Complex |
| TC0100008034.hg.1    | 4.2   | 4.87  | -1.59 | 0.0022 | 0.0084 | ZNF691     | zinc finger protein 691                           | Multiple_Complex |
| TC1900011838.hg.1    | 6     | 5.55  | 1.36  | 0.0022 | 0.0084 | JSRP1      | junctional sarcoplasmic reticulum protein 1       | Multiple_Complex |
| TC1600009849.hg.1    | 13.82 | 12.72 | 2.15  | 0.0022 | 0.0084 | XPO6       | exportin 6                                        | Multiple_Complex |
| TC1000010432.hg.1    | 6.85  | 6.34  | 1.43  | 0.0022 | 0.0084 | RASGEF1A   | RasGEF domain family member 1A                    | Multiple_Complex |
| TC1900009846.hg.1    | 5.32  | 4.74  | 1.5   | 0.0022 | 0.0085 | OR7A17     | olfactory receptor, family 7, subfamily A, mem    | Multiple_Complex |
| TC1800008679.hg.1    | 8.02  | 8.41  | -1.3  | 0.0022 | 0.0085 | MBD1       | methyl-CpG binding domain protein 1               | Multiple_Complex |
| TC2000009360.hg.1    | 10.4  | 9.8   | 1.51  | 0.0022 | 0.0085 | PREX1      | Memczak2013 ALT_ACCEPTOR, ALT_DONOR, NonCoding    | NonCoding        |
| TC0100014275.hg.1    | 5.6   | 6.15  | -1.46 | 0.0022 | 0.0085 | TTC22      | tetratricopeptide repeat domain 22                | Multiple_Complex |
| TC0300011000.hg.1    | 5.11  | 5.78  | -1.59 | 0.0022 | 0.0085 | MAP4       | Transcript Identified by AceView, Entrez Gene     | Unassigned       |
| TC0100009881.hg.1    | 7.72  | 7.17  | 1.46  | 0.0022 | 0.0085 | BOLA1      | bola family member 1                              | Multiple_Complex |
| TC1000006803.hg.1    | 6.68  | 5.98  | 1.63  | 0.0022 | 0.0085 | CAMK1D     | Memczak2013 ALT_ACCEPTOR, ALT_DONOR, NonCoding    | NonCoding        |
| TC0100012787.hg.1    | 6.64  | 5.76  | 1.84  | 0.0022 | 0.0085 | SLC2A5     | solute carrier family 2 (facilitated glucose/fruc | Multiple_Complex |
| TC0200008923.hg.1    | 3.96  | 4.26  | -1.23 | 0.0022 | 0.0085 | POLR1B     | polymerase (RNA) I polypeptide B                  | Multiple_Complex |
| TC0200008323.hg.1    | 4.96  | 5.89  | -1.91 | 0.0022 | 0.0085 | PLGLB2     | plasminogen-like B2                               | Multiple_Complex |
| TC1200010113.hg.1    | 4.11  | 3.34  | 1.7   | 0.0022 | 0.0085 | ABCC9      | Transcript Identified by AceView, Entrez Gene     | Unassigned       |
| TC1500009756.hg.1    | 5.9   | 4.76  | 2.2   | 0.0022 | 0.0085 | RBPMS2     | RNA binding protein with multiple splicing 2      | Coding           |
| TC2100007205.hg.1    | 11.19 | 13.01 | -3.54 | 0.0022 | 0.0086 | MX2        | MX dynamin-like GTPase 2                          | Multiple_Complex |
| TC1400006851.hg.1    | 6.88  | 7.46  | -1.5  | 0.0023 | 0.0086 | ARHGAP5    | Rho GTPase activating protein 5                   | Multiple_Complex |
| TC1900008967.hg.1    | 5.96  | 6.56  | -1.51 | 0.0023 | 0.0086 | ZNF470     | zinc finger protein 470                           | Multiple_Complex |
| TC0500009037.hg.1    | 4.35  | 3.88  | 1.39  | 0.0023 | 0.0086 | SPINK7     | serine peptidase inhibitor, Kazal type 7 (putati  | Multiple_Complex |
| TC1900011933.hg.1    | 6.82  | 7.52  | -1.63 | 0.0023 | 0.0086 | ZNF585A    | zinc finger protein 585A                          | Multiple_Complex |
| TC0100011573.hg.1    | 7.45  | 8.33  | -1.84 | 0.0023 | 0.0086 | SMYD2      | SET and MYND domain containing 2                  | Multiple_Complex |
| TC1200008873.hg.1    | 7.19  | 7.77  | -1.5  | 0.0023 | 0.0086 | SH2B3      | SH2B adaptor protein 3                            | Multiple_Complex |
| TC1900009079.hg.1    | 5.1   | 4.53  | 1.48  | 0.0023 | 0.0086 | MIER2      | Zhang2013 ALT_ACCEPTOR, ALT_DONOR, cod            | NonCoding        |
| TSUnmapped00000009.h | 6.46  | 5.76  | 1.62  | 0.0023 | 0.0086 | SURF1      | surfeit 1                                         | NonCoding        |
| TC0100016977.hg.1    | 5.42  | 4.9   | 1.43  | 0.0023 | 0.0087 | MYOG       | myogenin (myogenic factor 4)                      | Coding           |
| TC1100007675.hg.1    | 5.2   | 4.87  | 1.25  | 0.0023 | 0.0087 | RTN4RL2    | reticulin 4 receptor-like 2                       | Coding           |
| TC0200010053.hg.1    | 5.18  | 4.73  | 1.36  | 0.0023 | 0.0087 | HOXD1; MI  | homeobox D1; microRNA 7704                        | Multiple_Complex |
| TC1100011754.hg.1    | 3.68  | 3.32  | 1.28  | 0.0023 | 0.0087 | TENM4      | teneurin transmembrane protein 4                  | Multiple_Complex |
| TC0200014407.hg.1    | 9.13  | 9.84  | -1.64 | 0.0023 | 0.0087 | DARS       | aspartyl-tRNA synthetase                          | Multiple_Complex |
| TC1200010809.hg.1    | 7.46  | 8.25  | -1.73 | 0.0023 | 0.0087 | ATF7; NPFF | activating transcription factor 7; neuropeptide   | Multiple_Complex |
| TC1900011150.hg.1    | 6.49  | 7.27  | -1.72 | 0.0023 | 0.0087 | NOSIP      | nitric oxide synthase interacting protein         | Multiple_Complex |
| TC0400006433.hg.1    | 7.03  | 7.82  | -1.72 | 0.0023 | 0.0087 | ZNF595     | zinc finger protein 595                           | Multiple_Complex |
| TC1700012362.hg.1    | 4.37  | 5.12  | -1.69 | 0.0023 | 0.0087 | TRIM16     | tripartite motif containing 16                    | Multiple_Complex |
| TC1900008469.hg.1    | 4.84  | 4.24  | 1.51  | 0.0023 | 0.0087 | SYNGR4     | synaptogyrin 4                                    | Coding           |
| TC1700012371.hg.1    | 5.56  | 6.18  | -1.53 | 0.0023 | 0.0087 | ZNF286B; F | zinc finger protein 286B; forkhead box O3B ps     | Multiple_Complex |
| TC1100006906.hg.1    | 11.26 | 10.54 | 1.65  | 0.0023 | 0.0087 | FAR1       | fatty acyl CoA reductase 1                        | Multiple_Complex |
| TC1700009540.hg.1    | 5.7   | 5.35  | 1.27  | 0.0023 | 0.0087 | SPAG7      | sperm associated antigen 7                        | Multiple_Complex |
| TC1200012163.hg.1    | 9.22  | 8.67  | 1.46  | 0.0023 | 0.0087 | SRSF9      | serine/arginine-rich splicing factor 9            | Multiple_Complex |
| TC0600011123.hg.1    | 5.22  | 4.41  | 1.76  | 0.0023 | 0.0087 | HIST1H4B   | histone cluster 1, H4b                            | Coding           |
| TC1900008833.hg.1    | 6.78  | 7.82  | -2.05 | 0.0023 | 0.0088 | CNOT3      | CCR4-NOT transcription complex subunit 3          | Multiple_Complex |
| TC1700007791.hg.1    | 11.67 | 10.91 | 1.69  | 0.0023 | 0.0088 | RARA       | retinoic acid receptor, alpha                     | Multiple_Complex |
| TC0300007016.hg.1    | 5.16  | 4.63  | 1.44  | 0.0023 | 0.0088 | ARPP21     | Transcript Identified by AceView, Entrez Gene     | Unassigned       |
| TSUnmapped00000179.h | 5.45  | 6.05  | -1.51 | 0.0023 | 0.0088 | DYRK1B     | dual specificity tyrosine-(Y)-phosphorylation r   | Coding           |
| TC0X00006958.hg.1    | 16.2  | 17.11 | -1.88 | 0.0023 | 0.0088 | CYBB       | cytochrome b-245, beta polypeptide                | Multiple_Complex |
| TC1500009738.hg.1    | 6     | 5.25  | 1.68  | 0.0023 | 0.0088 | KIAA0101;  | KIAA0101; casein kinase 1, gamma 1                | Multiple_Complex |
| TC0900009050.hg.1    | 18.68 | 17.35 | 2.52  | 0.0023 | 0.0088 | EEF1A1P5   | eukaryotic translation elongation factor 1 alp    | Multiple_Complex |

|                      |       |       |       |        |                  |                                                    |                  |
|----------------------|-------|-------|-------|--------|------------------|----------------------------------------------------|------------------|
| TC0100018453.hg.1    | 3.82  | 3.5   | 1.25  | 0.0023 | 0.0088 ARHGAP29  | Rho GTPase activating protein 29                   | NonCoding        |
| TC0600006779.hg.1    | 3.72  | 3.36  | 1.28  | 0.0023 | 0.0088 KU-MEL-3; | uncharacterized LOC497048; uncharacterized         | Multiple_Complex |
| TC1500007753.hg.1    | 4.41  | 3.74  | 1.6   | 0.0023 | 0.0089 THSD4     | Transcript Identified by AceView, Entrez Gene      | Unassigned       |
| TC1400008007.hg.1    | 8.38  | 8.78  | -1.32 | 0.0023 | 0.0089 CPSF2     | cleavage and polyadenylation specific factor 2     | Multiple_Complex |
| TC14000010100.hg.1   | 6.2   | 6.83  | -1.54 | 0.0023 | 0.0089 ATG2B     | autophagy related 2B                               | Multiple_Complex |
| TC0X00009581.hg.1    | 6.68  | 7.21  | -1.44 | 0.0023 | 0.0089 ELK1      | ELK1, member of ETS oncogene family                | Multiple_Complex |
| TC1600011551.hg.1    | 6.98  | 6.25  | 1.65  | 0.0023 | 0.0089 TK2       | thymidine kinase 2, mitochondrial                  | Multiple_Complex |
| TC1900009429.hg.1    | 8.59  | 9.2   | -1.52 | 0.0023 | 0.0089 KHSRP;    | Mif KH-type splicing regulatory protein; microRNA  | Multiple_Complex |
| TC2000007466.hg.1    | 4     | 3.54  | 1.38  | 0.0024 | 0.0089 KCNK15    | potassium channel, two pore domain subfami         | Multiple_Complex |
| TC0600012863.hg.1    | 6.7   | 7.34  | -1.57 | 0.0024 | 0.0089 REV3L     | REV3 like, DNA directed polymerase zeta catal      | Multiple_Complex |
| TC1700009881.hg.1    | 10.89 | 11.45 | -1.47 | 0.0024 | 0.0089 NCOR1     | nuclear receptor corepressor 1                     | Multiple_Complex |
| TC0900007863.hg.1    | 5.93  | 5.25  | 1.6   | 0.0024 | 0.0089 KCS2      | CDC28 protein kinase regulatory subunit 2          | Multiple_Complex |
| TC1100013172.hg.1    | 4     | 4.74  | -1.67 | 0.0024 | 0.0089 INTS5     | integrator complex subunit 5                       | Multiple_Complex |
| TC1000009589.hg.1    | 6.1   | 6.87  | -1.71 | 0.0024 | 0.0089 PITRM1    | pitrilysin metallopeptidase 1                      | Multiple_Complex |
| TC0100014060.hg.1    | 6.2   | 6.72  | -1.44 | 0.0024 | 0.009 ATPAF1     | ATP synthase mitochondrial F1 complex assen        | Multiple_Complex |
| TCUn_GL000218v100006 | 5.39  | 6.32  | -1.91 | 0.0024 | 0.009 LOC389834  | ankyrin repeat domain 57 pseudogene                | Multiple_Complex |
| TC0500011448.hg.1    | 10.81 | 11.92 | -2.17 | 0.0024 | 0.009 ARRDC3     | arrestin domain containing 3                       | Multiple_Complex |
| TC0500012017.hg.1    | 12.61 | 11.85 | 1.7   | 0.0024 | 0.009 IRF1       | interferon regulatory factor 1                     | Multiple_Complex |
| TC1100007805.hg.1    | 5.47  | 6.08  | -1.53 | 0.0024 | 0.009 TMEM216    | transmembrane protein 216                          | Multiple_Complex |
| TC0300010676.hg.1    | 7.93  | 8.68  | -1.68 | 0.0024 | 0.009 CLASP2     | cytoplasmic linker associated protein 2            | Multiple_Complex |
| TC1200011310.hg.1    | 5.97  | 5.31  | 1.59  | 0.0024 | 0.009 PHLDA1     | pleckstrin homology-like domain, family A, me      | Multiple_Complex |
| TC0400012173.hg.1    | 4.72  | 5.71  | -1.99 | 0.0024 | 0.009 SFRP2      | secreted frizzled-related protein 2                | Coding           |
| TC0100015397.hg.1    | 10.97 | 10.43 | 1.46  | 0.0024 | 0.009 CD58       | CD58 molecule                                      | Multiple_Complex |
| TC1500007856.hg.1    | 9.49  | 10.51 | -2.03 | 0.0024 | 0.009 CSK        | c-src tyrosine kinase                              | Multiple_Complex |
| TC1700010662.hg.1    | 4.23  | 3.59  | 1.55  | 0.0024 | 0.009 KRTAP29-1  | keratin associated protein 29-1                    | Coding           |
| TC0200010726.hg.1    | 6.99  | 6.42  | 1.49  | 0.0024 | 0.0091 TMEM169   | transmembrane protein 169                          | Coding           |
| TC1000010602.hg.1    | 8.34  | 8.94  | -1.52 | 0.0024 | 0.0091 ERCC6;    | ERC excision repair cross-complementation group    | Multiple_Complex |
| TSUnmapped00000674.h | 5.98  | 5.29  | 1.61  | 0.0024 | 0.0091 CYP2D6    | cytochrome P450, family 2, subfamily D, polyt      | Coding           |
| TC0300012881.hg.1    | 7.01  | 7.6   | -1.51 | 0.0024 | 0.0091 SLC33A1   | solute carrier family 33 (acetyl-CoA transporte    | Multiple_Complex |
| TC1700008868.hg.1    | 7.95  | 8.54  | -1.51 | 0.0024 | 0.0091 TMEM104   | transmembrane protein 104                          | Multiple_Complex |
| TC1900009517.hg.1    | 4.33  | 3.96  | 1.29  | 0.0024 | 0.0091 FBN3      | fibrillin 3                                        | Multiple_Complex |
| TC1300009980.hg.1    | 4.54  | 5.09  | -1.46 | 0.0024 | 0.0091 LMO7      | LIM domain 7                                       | Multiple_Complex |
| TC1000010926.hg.1    | 5.31  | 4.99  | 1.25  | 0.0024 | 0.0091 TBATA     | thymus, brain and testes associated                | Multiple_Complex |
| TC1700007099.hg.1    | 5.32  | 5.88  | -1.48 | 0.0024 | 0.0091 DRG2      | developmentally regulated GTP binding protei       | Multiple_Complex |
| TC1200008920.hg.1    | 8.27  | 11.17 | -7.45 | 0.0024 | 0.0091 OAS3      | 2-5-oligoadenylate synthetase 3                    | Multiple_Complex |
| TC1200006881.hg.1    | 7.17  | 8.02  | -1.79 | 0.0024 | 0.0091 CREBL2    | cAMP responsive element binding protein-like       | Multiple_Complex |
| TC0600010211.hg.1    | 5.99  | 5.44  | 1.47  | 0.0024 | 0.0091 TLL2      | tubulin tyrosine ligase-like family member 2       | Coding           |
| TC0500010418.hg.1    | 10.01 | 10.47 | -1.37 | 0.0024 | 0.0092 GOLPH3    | golgi phosphoprotein 3 (coat-protein)              | Multiple_Complex |
| TC0100011963.hg.1    | 8.23  | 7.59  | 1.56  | 0.0024 | 0.0092 SPRTN     | SPRt-like N-terminal domain                        | Multiple_Complex |
| TSUnmapped00000651.h | 7.31  | 6.68  | 1.55  | 0.0024 | 0.0092 HNRNPCL1  | heterogeneous nuclear ribonucleoprotein C-lil      | Coding           |
| TC0800012386.hg.1    | 6.32  | 6.79  | -1.38 | 0.0024 | 0.0092 PINX1;    | MIR PIN2/TERF1 interacting, telomerase inhibitor   | Multiple_Complex |
| TC0100018518.hg.1    | 7.56  | 8.01  | -1.37 | 0.0024 | 0.0092 PEX19     | peroxisomal biogenesis factor 19                   | Multiple_Complex |
| TC1400007466.hg.1    | 8.9   | 9.48  | -1.49 | 0.0025 | 0.0092 FUT8      | fucosyltransferase 8 (alpha (1,6) fucosyltransf    | Multiple_Complex |
| TC1500010383.hg.1    | 5.16  | 5.74  | -1.5  | 0.0025 | 0.0092 POLG      | polymerase (DNA directed), gamma                   | Multiple_Complex |
| TC1000008234.hg.1    | 4.87  | 5.63  | -1.69 | 0.0025 | 0.0092 FAM213A   | family with sequence similarity 213, member        | Multiple_Complex |
| TC0200008262.hg.1    | 5.05  | 4.75  | 1.23  | 0.0025 | 0.0092 RNF181    | ring finger protein 181                            | Multiple_Complex |
| TC1300007237.hg.1    | 5.82  | 6.42  | -1.52 | 0.0025 | 0.0092 ALG11;    | UTF ALG11, alpha-1,2-mannosyltransferase; UTP1     | Multiple_Complex |
| TC0200011171.hg.1    | 5.1   | 4.78  | 1.25  | 0.0025 | 0.0092 SH3BP4    | SH3-domain binding protein 4                       | Multiple_Complex |
| TC0500013425.hg.1    | 5.43  | 5.93  | -1.42 | 0.0025 | 0.0093 C5orf45   | chromosome 5 open reading frame 45                 | Multiple_Complex |
| TC0500007179.hg.1    | 5.51  | 6.19  | -1.6  | 0.0025 | 0.0093 WDR70     | WD repeat domain 70                                | Multiple_Complex |
| TC1900011708.hg.1    | 5.87  | 6.71  | -1.79 | 0.0025 | 0.0093 PDCD2L    | programmed cell death 2-like                       | Multiple_Complex |
| TC1100012917.hg.1    | 6.26  | 6.58  | -1.25 | 0.0025 | 0.0093 NCAPD3    | non-SMC condensin II complex subunit D3            | Multiple_Complex |
| TC2100008382.hg.1    | 7.17  | 6.58  | 1.5   | 0.0025 | 0.0093 KRTAP12-1 | keratin associated protein 12-1                    | Coding           |
| TC1900008827.hg.1    | 5.93  | 5.44  | 1.41  | 0.0025 | 0.0093 CACNG8;   | iv calcium channel, voltage-dependent, gamma       | Multiple_Complex |
| TC0300010962.hg.1    | 6.16  | 5.58  | 1.49  | 0.0025 | 0.0093 MYL3      | myosin, light chain 3, alkali; ventricular, skelet | Coding           |
| TC1000011352.hg.1    | 4.86  | 4.21  | 1.56  | 0.0025 | 0.0093 KLLN      | killin, p53-regulated DNA replication inhibitor    | Coding           |
| TC0100010133.hg.1    | 7.08  | 7.69  | -1.53 | 0.0025 | 0.0093 MSTO1;    | M! misato 1, mitochondrial distribution and morp   | Multiple_Complex |
| TC0600011478.hg.1    | 6.12  | 5.44  | 1.6   | 0.0025 | 0.0094 FKBPL     | FK506 binding protein like                         | Coding           |
| TC0400012856.hg.1    | 7.25  | 6.62  | 1.54  | 0.0025 | 0.0094 RAPGEF2   | Rap guanine nucleotide exchange factor 2           | NonCoding        |
| TC1900011959.hg.1    | 8.64  | 6.65  | 3.98  | 0.0025 | 0.0094 CEACAM8   | carcinoembryonic antigen-related cell adhesio      | Coding           |
| TC1300009714.hg.1    | 10.41 | 9.3   | 2.17  | 0.0025 | 0.0094 ARGLU1    | arginine and glutamate rich 1                      | Multiple_Complex |
| TSUnmapped00000483.h | 7.58  | 7.2   | 1.31  | 0.0025 | 0.0094 RPS6KA1   | ribosomal protein S6 kinase, 90kDa, polypepti      | Coding           |
| TC1900011640.hg.1    | 4.51  | 3.97  | 1.45  | 0.0025 | 0.0094 EFNA2     | ephrin-A2                                          | Multiple_Complex |
| TC1000008665.hg.1    | 4.35  | 4.92  | -1.48 | 0.0025 | 0.0095 C10orf2   | chromosome 10 open reading frame 2                 | Multiple_Complex |
| TC0700008073.hg.1    | 8.47  | 7.47  | 2     | 0.0025 | 0.0095 POR;      | MIR4 P450 (cytochrome) oxidoreductase; microRNA    | Multiple_Complex |
| TC0100006994.hg.1    | 9.02  | 8.58  | 1.36  | 0.0025 | 0.0095 PLEKHM2   | pleckstrin homology domain containing, famil       | Multiple_Complex |
| TC0100012329.hg.1    | 7.93  | 9.1   | -2.24 | 0.0025 | 0.0095 OR2W3     | olfactory receptor, family 2, subfamily W, mer     | Coding           |
| TC2200008621.hg.1    | 5.44  | 4.82  | 1.54  | 0.0025 | 0.0095 PVALB     | parvalbumin                                        | Multiple_Complex |
| TC0700013620.hg.1    | 10    | 9.14  | 1.82  | 0.0025 | 0.0095 IMPDH1    | IMP (inosine 5-monophosphate) dehydrogena          | Multiple_Complex |
| TC0100018200.hg.1    | 5.37  | 6.16  | -1.73 | 0.0026 | 0.0095 SEPN1     | selenoprotein N, 1                                 | Multiple_Complex |

|                      |       |       |       |        |        |           |                                                    |                  |
|----------------------|-------|-------|-------|--------|--------|-----------|----------------------------------------------------|------------------|
| TC0200010894.hg.1    | 5.21  | 4.63  | 1.5   | 0.0026 | 0.0096 | CCDC140   | coiled-coil domain containing 140                  | Coding           |
| TC1700008938.hg.1    | 9.21  | 8.64  | 1.48  | 0.0026 | 0.0096 | UBALD2    | UBA-like domain containing 2                       | Multiple_Complex |
| TC2200009121.hg.1    | 7.69  | 8.13  | -1.36 | 0.0026 | 0.0096 | BRD1      | bromodomain containing 1                           | Multiple_Complex |
| TC0200007237.hg.1    | 6.39  | 6.84  | -1.37 | 0.0026 | 0.0096 | CRIM1     | cysteine rich transmembrane BMP regulator 1        | Multiple_Complex |
| TC0700012099.hg.1    | 10.48 | 9.91  | 1.48  | 0.0026 | 0.0096 | RAS44     | Salzman2013 ALT_ACCEPTOR, ALT_DONOR, c             | NonCoding        |
| TC0500008232.hg.1    | 9.57  | 10.78 | -2.3  | 0.0026 | 0.0097 | PPIP5K2   | diphosphoinositol pentakisphosphate kinase 2       | Multiple_Complex |
| TC0500008917.hg.1    | 5.86  | 6.59  | -1.65 | 0.0026 | 0.0097 | KIAA0141  | KIAA0141                                           | Multiple_Complex |
| TC1500010764.hg.1    | 10.18 | 9.64  | 1.45  | 0.0026 | 0.0097 | CLK3      | CDC like kinase 3                                  | Multiple_Complex |
| TC1400008665.hg.1    | 11.95 | 11.05 | 1.87  | 0.0026 | 0.0097 | DAD1      | defender against cell death 1                      | Multiple_Complex |
| TC0600007629.hg.1    | 5.22  | 4.56  | 1.58  | 0.0026 | 0.0097 | CYP21A2   | cytochrome P450, family 21, subfamily A, poly      | Multiple_Complex |
| TC1500009845.hg.1    | 8.7   | 7.56  | 2.2   | 0.0026 | 0.0097 | AAGAB     | alpha- and gamma-adaptin binding protein           | Multiple_Complex |
| TC1400009973.hg.1    | 7.38  | 8.07  | -1.61 | 0.0026 | 0.0097 | RPS6KA5   | ribosomal protein S6 kinase, 90kDa, polypepti      | Multiple_Complex |
| TC0500007415.hg.1    | 4     | 3.57  | 1.35  | 0.0026 | 0.0097 | GPX8      | glutathione peroxidase 8 (putative)                | Multiple_Complex |
| TC1400007033.hg.1    | 7.24  | 8.21  | -1.96 | 0.0026 | 0.0098 | FAM179B   | family with sequence similarity 179, member        | Multiple_Complex |
| TC1300008998.hg.1    | 7.87  | 9.02  | -2.21 | 0.0026 | 0.0098 | LINC00282 | long intergenic non-protein coding RNA 282         | NonCoding        |
| TC0300013146.hg.1    | 11.64 | 13.36 | -3.29 | 0.0026 | 0.0098 | TNFSF10   | tumor necrosis factor (ligand) superfamily, me     | Multiple_Complex |
| TC0700006634.hg.1    | 5.15  | 5.82  | -1.6  | 0.0026 | 0.0098 | AIMP2     | aminoacyl tRNA synthetase complex-interacti        | Multiple_Complex |
| TC0400006787.hg.1    | 4.57  | 4.09  | 1.4   | 0.0026 | 0.0098 | USP17L12  | ubiquitin specific peptidase 17-like family        | Coding           |
| TC1800009278.hg.1    | 5.25  | 4.8   | 1.37  | 0.0026 | 0.0099 | TCEB3CL   | transcription elongation factor B polypeptide      | Coding           |
| TC0100018435.hg.1    | 6.76  | 7.1   | -1.26 | 0.0027 | 0.0099 | EBNA1BP2; | EBNA1 binding protein 2; microRNA 6733             | Multiple_Complex |
| TC1000008005.hg.1    | 8.34  | 7.5   | 1.79  | 0.0027 | 0.0099 | MCU       | mitochondrial calcium uniporter                    | Multiple_Complex |
| TC0600007460.hg.1    | 4.77  | 4.05  | 1.65  | 0.0027 | 0.0099 | OR12D1    | olfactory receptor, family 12, subfamily D, me     | Pseudogene       |
| TC0100012460.hg.1    | 7.54  | 6.92  | 1.53  | 0.0027 | 0.0099 | UBE2J2    | Transcript Identified by AceView, Entrez Gene      | Unassigned       |
| TC1100013035.hg.1    | 4.83  | 4.39  | 1.35  | 0.0027 | 0.0099 | PPP2R5B   | protein phosphatase 2, regulatory subunit B, t     | NonCoding        |
| TSUnmapped00000344.h | 8.15  | 8.65  | -1.42 | 0.0027 | 0.01   | FBL       | fibrillarlin                                       | Coding           |
| TC0500009623.hg.1    | 5.2   | 4.83  | 1.3   | 0.0027 | 0.01   | PRR7      | proline rich 7 (synaptic)                          | Coding           |
| TC0800008198.hg.1    | 3.62  | 4.3   | -1.6  | 0.0027 | 0.01   | OTUD6B    | Transcript Identified by AceView, Entrez Gene      | Unassigned       |
| TC1100009997.hg.1    | 5.75  | 5.16  | 1.5   | 0.0027 | 0.01   | ZNF214    | zinc finger protein 214                            | Multiple_Complex |
| TC0800007309.hg.1    | 9.38  | 8.77  | 1.53  | 0.0027 | 0.01   | PROSC     | proline synthetase co-transcribed homolog (b       | Multiple_Complex |
| TC1600011383.hg.1    | 9.18  | 10.15 | -1.96 | 0.0027 | 0.01   | TMEM265;  | transmembrane protein 265; Snf2-related CRE        | Multiple_Complex |
| TC0400011706.hg.1    | 5.53  | 4.65  | 1.84  | 0.0027 | 0.0101 | FABP2     | fatty acid binding protein 2, intestinal           | Coding           |
| TC0400010745.hg.1    | 6.23  | 6.5   | -1.21 | 0.0027 | 0.0101 | CLOCK     | clock circadian regulator                          | Multiple_Complex |
| TC0500007681.hg.1    | 5.53  | 6.44  | -1.89 | 0.0027 | 0.0101 | OCLN      | occludin                                           | Multiple_Complex |
| TC0200016718.hg.1    | 5.35  | 4.6   | 1.69  | 0.0027 | 0.0102 | TBC1D8    | TBC1 domain family, member 8 (with GRAM d          | NonCoding        |
| TC0700008928.hg.1    | 5.83  | 6.73  | -1.86 | 0.0027 | 0.0102 | CPED1     | cadherin-like and PC-esterase domain contain       | Multiple_Complex |
| TC1900006856.hg.1    | 6.33  | 5.94  | 1.32  | 0.0027 | 0.0102 | CLEC4M    | C-type lectin domain family 4, member M            | Multiple_Complex |
| TC1900008655.hg.1    | 4.77  | 5.46  | -1.61 | 0.0027 | 0.0102 | ZNF175    | zinc finger protein 175                            | Multiple_Complex |
| TC1100007964.hg.1    | 5.53  | 6.1   | -1.48 | 0.0028 | 0.0103 | SLC22A11  | solute carrier family 22 (organic anion/urate t    | Multiple_Complex |
| TC2200007976.hg.1    | 5.57  | 5.93  | -1.29 | 0.0028 | 0.0103 | SLC25A1   | solute carrier family 25 (mitochondrial carrier    | Multiple_Complex |
| TC1900007325.hg.1    | 7.18  | 8.03  | -1.81 | 0.0028 | 0.0103 | MVB12A;   | B multivesicular body subunit 12A; BST2 interfe    | Multiple_Complex |
| TC1500010368.hg.1    | 5.58  | 5.96  | -1.3  | 0.0028 | 0.0103 | HAPLN3    | hyaluronan and proteoglycan link protein 3         | Multiple_Complex |
| TC0500009264.hg.1    | 4.81  | 4.31  | 1.41  | 0.0028 | 0.0103 | ADRA1B    | adrenoceptor alpha 1B                              | Coding           |
| TC0100013881.hg.1    | 5.24  | 4.81  | 1.35  | 0.0028 | 0.0103 | GUCA2A    | guanylate cyclase activator 2A (guanylin)          | Coding           |
| TC1000008995.hg.1    | 4.53  | 3.91  | 1.54  | 0.0028 | 0.0103 | ATRNL1    | attractin-like 1                                   | Multiple_Complex |
| TC0X00008097.hg.1    | 7.69  | 6.86  | 1.78  | 0.0028 | 0.0103 | NXT2      | nuclear transport factor 2-like export factor 2    | Coding           |
| TC0X00006955.hg.1    | 5.23  | 4.59  | 1.56  | 0.0028 | 0.0103 | LANCL3    | LanC lantibiotic synthetase component C-like       | Coding           |
| TC2000008499.hg.1    | 7.13  | 6.57  | 1.47  | 0.0028 | 0.0103 | RRBP1     | ribosome binding protein 1                         | Multiple_Complex |
| TC1900008600.hg.1    | 4.87  | 4.45  | 1.34  | 0.0028 | 0.0104 | GPR32     | G protein-coupled receptor 32                      | Coding           |
| TC1200009497.hg.1    | 5.87  | 5.31  | 1.48  | 0.0028 | 0.0104 | P2RX2     | purinergic receptor P2X, ligand gated ion chan     | Coding           |
| TC1300007074.hg.1    | 4.38  | 3.9   | 1.4   | 0.0028 | 0.0104 | SPERT     | spermatid associated                               | Coding           |
| TC1400010714.hg.1    | 8.66  | 7.48  | 2.26  | 0.0028 | 0.0104 | HAUS4;    | MIII HAUS augmin like complex subunit 4; microRN   | Multiple_Complex |
| TC0300007392.hg.1    | 4.8   | 4.36  | 1.35  | 0.0028 | 0.0104 | FAM212A   | family with sequence similarity 212, member        | Coding           |
| TC2000006580.hg.1    | 6.74  | 5.69  | 2.07  | 0.0028 | 0.0104 | RASSF2    | Memczak2013 ANTISENSE, coding, INTERNAL,           | NonCoding        |
| TC0100010546.hg.1    | 9.37  | 8     | 2.58  | 0.0028 | 0.0104 | BLZF1     | basic leucine zipper nuclear factor 1              | Multiple_Complex |
| TC1200007847.hg.1    | 4.49  | 4.26  | 1.18  | 0.0028 | 0.0104 | HSD17B6   | hydroxysteroid (17-beta) dehydrogenase 6           | Multiple_Complex |
| TC0300006687.hg.1    | 7.26  | 7.72  | -1.38 | 0.0028 | 0.0104 | CCDC174   | coiled-coil domain containing 174                  | Multiple_Complex |
| TC0300013635.hg.1    | 12.35 | 11.61 | 1.68  | 0.0028 | 0.0105 | ACAP2     | ArfGAP with coiled-coil, ankyrin repeat and Pf     | Multiple_Complex |
| TC1100007390.hg.1    | 7.11  | 7.67  | -1.48 | 0.0028 | 0.0105 | EXT2      | exostosin glycosyltransferase 2                    | Multiple_Complex |
| TC0600009095.hg.1    | 8.38  | 7.54  | 1.79  | 0.0028 | 0.0105 | MICAL1    | Jeck2013 ANTISENSE, coding, INTERNAL, intro        | NonCoding        |
| TC1100010893.hg.1    | 5.54  | 6.15  | -1.53 | 0.0028 | 0.0105 | SLC43A1   | solute carrier family 43 (amino acid system L t    | Multiple_Complex |
| TC0200014821.hg.1    | 4.45  | 4.04  | 1.33  | 0.0028 | 0.0105 | SCN7A     | sodium channel, voltage gated, type VII alpha      | Multiple_Complex |
| TC1100009799.hg.1    | 4.3   | 4.67  | -1.3  | 0.0028 | 0.0105 | TRPM5     | transient receptor potential cation channel, sc    | Coding           |
| TC0900007321.hg.1    | 5.7   | 5.2   | 1.41  | 0.0028 | 0.0105 | SPATA31A  | SPATA31 subfamily A, member 5; SPATA31 su          | Multiple_Complex |
| TC0100008599.hg.1    | 4.15  | 3.63  | 1.43  | 0.0028 | 0.0105 | UBE2U     | ubiquitin-conjugating enzyme E2U (putative)        | Multiple_Complex |
| TC0100015957.hg.1    | 8.09  | 8.57  | -1.39 | 0.0028 | 0.0105 | ASH1L;    | MIF ash1 (absent, small, or homeotic)-like (Drosop | Multiple_Complex |
| TC1000008750.hg.1    | 9.69  | 10.18 | -1.4  | 0.0028 | 0.0105 | WBP1L     | WW domain binding protein 1-like                   | Multiple_Complex |
| TC2200008609.hg.1    | 7.12  | 7.49  | -1.29 | 0.0028 | 0.0105 | TXN2      | thioredoxin 2                                      | Multiple_Complex |
| TC0100013134.hg.1    | 14.58 | 15.08 | -1.41 | 0.0028 | 0.0105 | CAPZB     | capping protein (actin filament) muscle Z-line,    | Multiple_Complex |
| TSUnmapped00000776.h | 7.91  | 8.54  | -1.55 | 0.0028 | 0.0105 | FBL       | fibrillarlin                                       | Coding           |
| TC0400012818.hg.1    | 12.68 | 11.54 | 2.2   | 0.0029 | 0.0105 | CCNG2     | cyclin G2                                          | Multiple_Complex |

|                      |       |       |       |        |                  |                                                  |                  |
|----------------------|-------|-------|-------|--------|------------------|--------------------------------------------------|------------------|
| TC0700011710.hg.1    | 9.14  | 10.03 | -1.85 | 0.0029 | 0.0105 SLC25A40  | solute carrier family 25, member 40              | Multiple_Complex |
| TC0900011978.hg.1    | 4.38  | 4.87  | -1.4  | 0.0029 | 0.0106 SDCCAG3   | serologically defined colon cancer antigen 3     | Multiple_Complex |
| TC0700009692.hg.1    | 6.44  | 6.92  | -1.4  | 0.0029 | 0.0106 SLC4A2    | solute carrier family 4 (anion exchanger), men   | Multiple_Complex |
| TC1000011577.hg.1    | 5.9   | 6.45  | -1.46 | 0.0029 | 0.0106 PYROXD2;  | pyridine nucleotide-disulphide oxidoreductase    | Multiple_Complex |
| TC0900008860.hg.1    | 6.25  | 6.72  | -1.38 | 0.0029 | 0.0106 SLC27A4   | solute carrier family 27 (fatty acid transporter | Multiple_Complex |
| TC2000006861.hg.1    | 6.93  | 7.95  | -2.03 | 0.0029 | 0.0106 RIN2      | Ras and Rab interactor 2                         | Multiple_Complex |
| TC1600009210.hg.1    | 5.16  | 5.77  | -1.52 | 0.0029 | 0.0106 ADCY9     | adenylate cyclase 9                              | Multiple_Complex |
| TC0300010968.hg.1    | 9.57  | 9.09  | 1.4   | 0.0029 | 0.0106 SETD2     | SET domain containing 2                          | Multiple_Complex |
| TC1700010293.hg.1    | 8.58  | 9.34  | -1.7  | 0.0029 | 0.0106 CRLF3     | cytokine receptor-like factor 3                  | Multiple_Complex |
| TC0500008107.hg.1    | 6.65  | 5.89  | 1.69  | 0.0029 | 0.0106 SLF1      | SMC5-SMC6 complex localization factor 1          | Multiple_Complex |
| TC0400011580.hg.1    | 5.54  | 5     | 1.45  | 0.0029 | 0.0106 CFI       | complement factor I                              | Multiple_Complex |
| TC1100009911.hg.1    | 3.81  | 3.39  | 1.34  | 0.0029 | 0.0107 OR52A5    | olfactory receptor, family 52, subfamily A, me   | Coding           |
| TC1200009076.hg.1    | 7.2   | 6.28  | 1.89  | 0.0029 | 0.0107 SUDS3     | SDS3 homolog, SIN3A corepressor complex co       | Multiple_Complex |
| TC1700011261.hg.1    | 6.08  | 5.26  | 1.76  | 0.0029 | 0.0107 4-Sep     | septin 4                                         | Multiple_Complex |
| TC1100013224.hg.1    | 7.54  | 8.27  | -1.66 | 0.0029 | 0.0107 POU2AF1   | POU class 2 associating factor 1                 | Multiple_Complex |
| TC1900009087.hg.1    | 4.35  | 3.95  | 1.33  | 0.0029 | 0.0107 ODF3L2    | outer dense fiber of sperm tails 3-like 2        | Multiple_Complex |
| TC1600011048.hg.1    | 5.69  | 6.13  | -1.36 | 0.0029 | 0.0107 TAF1C     | TATA box binding protein (TBP)-associated fac    | Multiple_Complex |
| TC1900010482.hg.1    | 6.92  | 6.34  | 1.5   | 0.0029 | 0.0108 ATP4A     | ATPase, H+/K+ exchanging, alpha polypeptide      | Multiple_Complex |
| TC0300012171.hg.1    | 8.29  | 8.88  | -1.51 | 0.0029 | 0.0108 IQCB1     | IQ motif containing B1                           | Multiple_Complex |
| TC0400007868.hg.1    | 4     | 4.75  | -1.67 | 0.0029 | 0.0108 PARM1     | prostate androgen-regulated mucin-like prote     | Multiple_Complex |
| TC1600011518.hg.1    | 4.38  | 3.91  | 1.38  | 0.0029 | 0.0108 DOC2A     | double C2-like domains, alpha                    | Multiple_Complex |
| TC2100007896.hg.1    | 3.78  | 3.31  | 1.38  | 0.0029 | 0.0108 KRTAP19-2 | keratin associated protein 19-2                  | Coding           |
| TC0900012025.hg.1    | 6.04  | 5.59  | 1.37  | 0.0029 | 0.0108 ABCA2     | ATP binding cassette subfamily A member 2        | Multiple_Complex |
| TC0700007132.hg.1    | 6.71  | 5.99  | 1.65  | 0.0029 | 0.0108 FKBP9     | FK506 binding protein 9                          | Multiple_Complex |
| TC0600012540.hg.1    | 5.18  | 4.53  | 1.56  | 0.0029 | 0.0108 GABRR2    | gamma-aminobutyric acid (GABA) A receptor,       | Multiple_Complex |
| TC0400012900.hg.1    | 13.46 | 12.47 | 1.99  | 0.003  | 0.0109 FBXL5     | F-box and leucine-rich repeat protein 5          | Multiple_Complex |
| TC0100018389.hg.1    | 10.5  | 9.74  | 1.69  | 0.003  | 0.0109 CDK11A    | cyclin-dependent kinase 11A                      | Multiple_Complex |
| TC2000008808.hg.1    | 4.68  | 4.24  | 1.36  | 0.003  | 0.0109 DEFB121   | defensin, beta 121                               | Multiple_Complex |
| TC0400008347.hg.1    | 6.17  | 6.52  | -1.27 | 0.003  | 0.0109 CYP2U1    | cytochrome P450, family 2, subfamily U, polyr    | Multiple_Complex |
| TC1300006811.hg.1    | 7.25  | 7.95  | -1.62 | 0.003  | 0.0109 PDS5B     | Memczak2013 ALT_ACCEPTOR, ALT_DONOR,             | NonCoding        |
| TC0800011533.hg.1    | 5.46  | 6.01  | -1.47 | 0.003  | 0.0109 TRPS1     | Transcript Identified by AceView, Entrez Gene    | Unassigned       |
| TC0400011882.hg.1    | 5.89  | 5.37  | 1.44  | 0.003  | 0.0109 PABPC4L   | poly(A) binding protein, cytoplasmic 4-like      | Coding           |
| TC1900008516.hg.1    | 4.82  | 4.46  | 1.28  | 0.003  | 0.0109 CGB5; CGB | chorionic gonadotropin, beta polypeptide 5; c    | Coding           |
| TC0400011015.hg.1    | 6.49  | 5.79  | 1.62  | 0.003  | 0.0109 CXCL3     | chemokine (C-X-C motif) ligand 3                 | Multiple_Complex |
| TC0600007203.hg.1    | 7.26  | 6.34  | 1.89  | 0.003  | 0.0109 ACOT13    | acyl-CoA thioesterase 13                         | Multiple_Complex |
| TC0900012292.hg.1    | 4.22  | 3.85  | 1.29  | 0.003  | 0.0109 LRRC26    | leucine rich repeat containing 26                | Coding           |
| TC0900010958.hg.1    | 7.98  | 8.5   | -1.43 | 0.003  | 0.0109 TRMO      | tRNA methyltransferase O                         | Multiple_Complex |
| TC1200007829.hg.1    | 9.53  | 10.55 | -2.03 | 0.003  | 0.011 SMARCC2    | Memczak2013 ANTISENSE, CDS, coding, INTEF        | NonCoding        |
| TC0900008277.hg.1    | 5.88  | 5.46  | 1.34  | 0.003  | 0.011 CYLC2      | cylicin, basic protein of sperm head cytoskelet  | Multiple_Complex |
| TC1700008418.hg.1    | 10.17 | 9.37  | 1.75  | 0.003  | 0.011 DYNLL2     | dynein, light chain, LC8-type 2                  | Multiple_Complex |
| TC1900011764.hg.1    | 5.78  | 6.21  | -1.35 | 0.003  | 0.011 GEMIN7     | gem nuclear organelle associated protein 7       | Multiple_Complex |
| TC0100013272.hg.1    | 4.77  | 4.34  | 1.35  | 0.003  | 0.011 HTR1D      | 5-hydroxytryptamine (serotonin) receptor 1D,     | Coding           |
| TC0300009613.hg.1    | 4.17  | 4.74  | -1.48 | 0.003  | 0.011 USP13      | ubiquitin specific peptidase 13 (isopeptidase T  | Multiple_Complex |
| TC0500011943.hg.1    | 6.08  | 6.72  | -1.56 | 0.003  | 0.011 C5orf63    | chromosome 5 open reading frame 63               | Multiple_Complex |
| TC1800006715.hg.1    | 8.63  | 7.79  | 1.79  | 0.003  | 0.011 IMPA2      | inositol(myo)-1(or 4)-monophosphatase 2          | Multiple_Complex |
| TC1200009767.hg.1    | 9.22  | 9.87  | -1.56 | 0.003  | 0.011 PHB2; SCAF | prohibitin 2; small Cajal body-specific RNA 12   | Multiple_Complex |
| TC1200009250.hg.1    | 6.19  | 6.86  | -1.59 | 0.003  | 0.0111 GTF2H3    | general transcription factor IIH subunit 3       | Multiple_Complex |
| TC1600009074.hg.1    | 15.56 | 14.32 | 2.35  | 0.003  | 0.0111 MSRB1     | methionine sulfoxide reductase B1                | Multiple_Complex |
| TC2100007491.hg.1    | 5.35  | 4.74  | 1.52  | 0.003  | 0.0111 CBS       | cystathionine-beta-synthase                      | Multiple_Complex |
| TC0600008229.hg.1    | 5.12  | 4.63  | 1.4   | 0.003  | 0.0111 TFAP2D    | transcription factor AP-2 delta (activating enh  | Multiple_Complex |
| TC1700009995.hg.1    | 4.97  | 5.9   | -1.9  | 0.003  | 0.0111 GRAP      | GRB2-related adaptor protein                     | Multiple_Complex |
| TC0300012670.hg.1    | 4.8   | 5.3   | -1.41 | 0.003  | 0.0111 ATR       | ATR serine/threonine kinase                      | Multiple_Complex |
| TC1900011751.hg.1    | 8.97  | 9.57  | -1.52 | 0.003  | 0.0111 ZNF222    | zinc finger protein 222                          | Multiple_Complex |
| TC0200011020.hg.1    | 8.97  | 9.88  | -1.89 | 0.0031 | 0.0112 SP140     | SP140 nuclear body protein                       | Multiple_Complex |
| TC0100012544.hg.1    | 4.45  | 3.98  | 1.39  | 0.0031 | 0.0112 MMEL1     | membrane metallo-endopeptidase-like 1            | Multiple_Complex |
| TC1900012006.hg.1    | 6.43  | 6.8   | -1.29 | 0.0031 | 0.0112 AKT1S1    | AKT1 substrate 1 (proline rich)                  | Multiple_Complex |
| TC0100016597.hg.1    | 9.54  | 8.6   | 1.91  | 0.0031 | 0.0112 STX6      | syntaxin 6                                       | Multiple_Complex |
| TC1500010921.hg.1    | 6.49  | 7.05  | -1.48 | 0.0031 | 0.0112 MRPL46    | mitochondrial ribosomal protein L46              | Multiple_Complex |
| TC1900009039.hg.1    | 5.62  | 6.09  | -1.39 | 0.0031 | 0.0112 ZSCAN22;  | zinc finger and SCAN domain containing 22; m     | Multiple_Complex |
| TC0800009641.hg.1    | 9.2   | 9.69  | -1.4  | 0.0031 | 0.0112 FAM86B1   | family with sequence similarity 86, member B     | Multiple_Complex |
| TSUnmapped00000394.h | 4.76  | 5.49  | -1.65 | 0.0031 | 0.0112 ATG16L1   | autophagy related 16-like 1                      | Coding           |
| TC0200015720.hg.1    | 4.41  | 4.85  | -1.35 | 0.0031 | 0.0112 AAMP      | angio-associated migratory cell protein          | Multiple_Complex |
| TC1900007787.hg.1    | 5.35  | 4.94  | 1.32  | 0.0031 | 0.0112 KCTD15    | potassium channel tetramerization domain co      | Multiple_Complex |
| TC0X00009645.hg.1    | 8.32  | 7.86  | 1.38  | 0.0031 | 0.0113 GRIPAP1   | GRIP1 associated protein 1                       | Multiple_Complex |
| TC0200008059.hg.1    | 8.05  | 8.88  | -1.77 | 0.0031 | 0.0113 STAMPB    | STAM binding protein                             | Multiple_Complex |
| TC2100008061.hg.1    | 6.47  | 6.89  | -1.34 | 0.0031 | 0.0113 SETD4     | SET domain containing 4                          | Multiple_Complex |
| TC1100013048.hg.1    | 6.91  | 7.33  | -1.34 | 0.0031 | 0.0113 DPP3      | dipeptidyl-peptidase 3                           | Multiple_Complex |
| TC0600013780.hg.1    | 5.53  | 6.17  | -1.56 | 0.0031 | 0.0114 LPAL2     | lipoprotein, Lp(a)-like 2, pseudogene            | Multiple_Complex |
| TC0200007184.hg.1    | 9.75  | 10.25 | -1.42 | 0.0031 | 0.0114 BIRC6     | baculoviral IAP repeat containing 6              | Multiple_Complex |
| TC1100007767.hg.1    | 6.37  | 5.63  | 1.67  | 0.0031 | 0.0114 MS4A4A    | membrane-spanning 4-domains, subfamily A,        | Multiple_Complex |



|                   |       |       |       |        |                  |                                                  |                  |
|-------------------|-------|-------|-------|--------|------------------|--------------------------------------------------|------------------|
| TC1400006853.hg.1 | 3.6   | 4.33  | -1.66 | 0.0031 | 0.0114 AKAP6     | A kinase (PKA) anchor protein 6                  | Multiple_Complex |
| TC1100009926.hg.1 | 4.66  | 4.13  | 1.44  | 0.0031 | 0.0114 OR51B2    | olfactory receptor, family 51, subfamily B, me   | Multiple_Complex |
| TC0200015348.hg.1 | 9.84  | 8.92  | 1.9   | 0.0031 | 0.0114 SF3B1     | splicing factor 3b, subunit 1, 155kDa            | Multiple_Complex |
| TC1000007333.hg.1 | 9.01  | 9.65  | -1.57 | 0.0031 | 0.0114 ZNF33A    | zinc finger protein 33A                          | Multiple_Complex |
| TC0X00010033.hg.1 | 5.23  | 5.49  | -1.2  | 0.0031 | 0.0114 HDAC8     | histone deacetylase 8                            | Multiple_Complex |
| TC1700010635.hg.1 | 4.73  | 4.15  | 1.49  | 0.0031 | 0.0114 KRT24     | keratin 24, type I                               | Multiple_Complex |
| TC1500006683.hg.1 | 8.34  | 8.77  | -1.35 | 0.0031 | 0.0114 APBA2     | amyloid beta (A4) precursor protein-binding, i   | Multiple_Complex |
| TC0300008746.hg.1 | 7.17  | 7.49  | -1.25 | 0.0031 | 0.0114 ACAD9     | acyl-CoA dehydrogenase family, member 9          | Multiple_Complex |
| TC0500008602.hg.1 | 7.51  | 6.77  | 1.67  | 0.0031 | 0.0114 LYRM7     | LYR motif containing 7                           | Multiple_Complex |
| TC1200010618.hg.1 | 13.99 | 13.21 | 1.72  | 0.0031 | 0.0115 TUBA1A    | tubulin, alpha 1a                                | Multiple_Complex |
| TC0900010971.hg.1 | 5.99  | 6.77  | -1.72 | 0.0031 | 0.0115 TBC1D2    | TBC1 domain family, member 2                     | Multiple_Complex |
| TC0600008319.hg.1 | 3.85  | 3.38  | 1.38  | 0.0031 | 0.0115 FAM83B    | family with sequence similarity 83, member B     | Multiple_Complex |
| TC1500009996.hg.1 | 6.74  | 6.36  | 1.29  | 0.0031 | 0.0115 STOML1    | stomatin (EPB72)-like 1                          | Multiple_Complex |
| TC1000008423.hg.1 | 6.66  | 7.3   | -1.57 | 0.0032 | 0.0115 RPP30     | ribonuclease P/MRP 30kDa subunit                 | Multiple_Complex |
| TC2200007876.hg.1 | 4.62  | 4.32  | 1.23  | 0.0032 | 0.0115 XKR3      | X-linked Kx blood group related 3                | Multiple_Complex |
| TC0200008911.hg.1 | 6.21  | 6.84  | -1.54 | 0.0032 | 0.0115 ZC3H6     | zinc finger CCCH-type containing 6               | Multiple_Complex |
| TC0300009468.hg.1 | 7.4   | 8.15  | -1.67 | 0.0032 | 0.0116 PRKI      | protein kinase C, iota                           | Multiple_Complex |
| TC0X00011204.hg.1 | 6.64  | 7     | -1.29 | 0.0032 | 0.0116 LAGE3     | L antigen family, member 3                       | Coding           |
| TC2000008587.hg.1 | 10.67 | 9.4   | 2.41  | 0.0032 | 0.0116 RALGAP2   | Ral GTPase activating protein, alpha subunit 2   | Multiple_Complex |
| TC0600010807.hg.1 | 4.47  | 4.15  | 1.25  | 0.0032 | 0.0116 ERVFRD-1  | endogenous retrovirus group FRD, member 1        | Coding           |
| TC0100018507.hg.1 | 10.32 | 11.08 | -1.69 | 0.0032 | 0.0117 ARHGEF2   | Rho/Rac guanine nucleotide exchange factor 2     | Multiple_Complex |
| TC0100013305.hg.1 | 6.39  | 6.91  | -1.43 | 0.0032 | 0.0117 FUCA1     | fucosidase, alpha-L- 1, tissue                   | Coding           |
| TC0600014110.hg.1 | 11.91 | 12.91 | -2    | 0.0032 | 0.0117 PSMB9     | proteasome subunit beta 9                        | Multiple_Complex |
| TC1100007598.hg.1 | 4.29  | 3.77  | 1.43  | 0.0032 | 0.0117 OR4C16    | olfactory receptor, family 4, subfamily C, mem   | Multiple_Complex |
| TC1800006493.hg.1 | 6.78  | 6.33  | 1.36  | 0.0032 | 0.0117 EMILIN2   | elastin microfibril interfacer 2                 | Multiple_Complex |
| TC1500007961.hg.1 | 3.98  | 3.57  | 1.33  | 0.0032 | 0.0117 SH2D7     | SH2 domain containing 7                          | Coding           |
| TC1400007712.hg.1 | 7.73  | 7.05  | 1.61  | 0.0032 | 0.0117 BATF      | basic leucine zipper transcription factor, ATF-I | Multiple_Complex |
| TC0900009931.hg.1 | 6.53  | 6.86  | -1.25 | 0.0032 | 0.0118 PIGO      | phosphatidylinositol glycan anchor biosynthes    | Multiple_Complex |
| TC1200006782.hg.1 | 6.8   | 6.14  | 1.58  | 0.0033 | 0.0118 CLEC9A    | C-type lectin domain family 9, member A          | Multiple_Complex |
| TC2200006713.hg.1 | 12.38 | 11.81 | 1.49  | 0.0033 | 0.0119 UBE2L3    | ubiquitin conjugating enzyme E2L 3               | Multiple_Complex |
| TC1900008692.hg.1 | 6.39  | 6.93  | -1.45 | 0.0033 | 0.0119 ZNF480    | zinc finger protein 480                          | Multiple_Complex |
| TC1600007217.hg.1 | 5.79  | 5.48  | 1.24  | 0.0033 | 0.0119 SCNN1B    | sodium channel, non voltage gated 1 beta sub     | Multiple_Complex |
| TC2000006823.hg.1 | 4.53  | 5.16  | -1.55 | 0.0033 | 0.0119 ZNF133    | zinc finger protein 133                          | Multiple_Complex |
| TC1100006998.hg.1 | 8.85  | 9.48  | -1.55 | 0.0033 | 0.0119 GTF2H1    | general transcription factor IIH subunit 1       | Multiple_Complex |
| TC1200010597.hg.1 | 8.85  | 9.4   | -1.46 | 0.0033 | 0.0119 DDX23     | DEAD (Asp-Glu-Ala-Asp) box polypeptide 23        | Multiple_Complex |
| TC0700009462.hg.1 | 8.1   | 7.43  | 1.59  | 0.0033 | 0.0119 MTRNR2L6  | MT-RNR2-like 6                                   | Coding           |
| TC1900007063.hg.1 | 4.15  | 3.78  | 1.29  | 0.0033 | 0.0119 ZNF788    | zinc finger family member 788                    | Multiple_Complex |
| TC0800008940.hg.1 | 10.86 | 10.36 | 1.41  | 0.0033 | 0.0119 PHF20L1   | PHD finger protein 20-like 1                     | Multiple_Complex |
| TC1700012449.hg.1 | 5.97  | 5.49  | 1.39  | 0.0033 | 0.0119 CSHL1     | chorionic somatomammotropin hormone-like         | Multiple_Complex |
| TC0900012290.hg.1 | 6.67  | 6.2   | 1.39  | 0.0033 | 0.0119 FUT7      | fucosyltransferase 7 (alpha (1,3) fucosyltransf  | Coding           |
| TC0100017451.hg.1 | 10.03 | 9.4   | 1.55  | 0.0033 | 0.0119 TP53BP2   | tumor protein p53 binding protein 2              | Multiple_Complex |
| TC0200014402.hg.1 | 5.81  | 5.26  | 1.46  | 0.0033 | 0.0119 LCT       | lactase                                          | Coding           |
| TC1600010798.hg.1 | 5.23  | 4.69  | 1.45  | 0.0033 | 0.0119 ZNF821    | zinc finger protein 821                          | Multiple_Complex |
| TC1700010222.hg.1 | 10.95 | 10.19 | 1.69  | 0.0033 | 0.012 PHF12      | PHD finger protein 12                            | Multiple_Complex |
| TC0800009166.hg.1 | 3.57  | 3.14  | 1.35  | 0.0033 | 0.012 GML        | glycosylphosphatidylinositol anchored molecu     | Coding           |
| TC1200012159.hg.1 | 5.16  | 4.56  | 1.51  | 0.0033 | 0.012 MSI1       | musashi RNA binding protein 1                    | Multiple_Complex |
| TC2000007792.hg.1 | 6.38  | 5.76  | 1.53  | 0.0033 | 0.0121 PFDN4     | prefoldin subunit 4                              | Multiple_Complex |
| TC0500010924.hg.1 | 4.73  | 4.31  | 1.34  | 0.0033 | 0.0121 ADAMT56   | ADAM metalloproteinase with thrombospondin       | Multiple_Complex |
| TC0400010132.hg.1 | 9.52  | 10.06 | -1.45 | 0.0033 | 0.0121 TAPT1     | transmembrane anterior posterior transform       | Multiple_Complex |
| TC0500011228.hg.1 | 7.56  | 8.11  | -1.46 | 0.0033 | 0.0121 ARSB      | arylsulfatase B                                  | Multiple_Complex |
| TC0600011697.hg.1 | 5.37  | 5.88  | -1.42 | 0.0034 | 0.0122 CCDC167   | coiled-coil domain containing 167                | Coding           |
| TC0300009916.hg.1 | 5.49  | 4.88  | 1.53  | 0.0034 | 0.0122 HES1      | hes family bHLH transcription factor 1           | Multiple_Complex |
| TC1100011048.hg.1 | 9.67  | 8.74  | 1.9   | 0.0034 | 0.0122 TMEM258;  | transmembrane protein 258; microRNA 611          | Multiple_Complex |
| TC0X00007236.hg.1 | 4.23  | 3.64  | 1.5   | 0.0034 | 0.0122 GAGE12C;  | G antigen 12C; G antigen 12E; G antigen 12H      | Coding           |
| TC0800006887.hg.1 | 4.83  | 5.19  | -1.28 | 0.0034 | 0.0122 NAT1      | N-acetyltransferase 1 (arylamine N-acetyltran    | Multiple_Complex |
| TC0600009508.hg.1 | 9.63  | 8.76  | 1.82  | 0.0034 | 0.0122 TBPL1     | TBP-like 1                                       | Multiple_Complex |
| TC0500012879.hg.1 | 6.49  | 6.93  | -1.36 | 0.0034 | 0.0123 BOD1      | bioorientation of chromosomes in cell division   | Multiple_Complex |
| TC1400010721.hg.1 | 8.54  | 7.87  | 1.59  | 0.0034 | 0.0123 PSME2; MI | proteasome activator subunit 2; microRNA 77      | Multiple_Complex |
| TC1100006815.hg.1 | 6.51  | 7.24  | -1.66 | 0.0034 | 0.0123 WEE1      | WEE1 G2 checkpoint kinase                        | Multiple_Complex |
| TC1200006654.hg.1 | 5.12  | 5.51  | -1.31 | 0.0034 | 0.0123 ATN1      | atrophin 1                                       | Multiple_Complex |
| TC1900007330.hg.1 | 5.19  | 5.69  | -1.41 | 0.0034 | 0.0123 FAM129C   | family with sequence similarity 129, member 1    | Multiple_Complex |
| TC1900011956.hg.1 | 4.17  | 3.54  | 1.55  | 0.0034 | 0.0124 CYP2A7    | cytochrome P450, family 2, subfamily A, poly     | Multiple_Complex |
| TC1600009957.hg.1 | 6.84  | 7.45  | -1.52 | 0.0034 | 0.0124 LOC388242 | Homo sapiens coiled-coil domain containing 1     | Multiple_Complex |
| TC0700013368.hg.1 | 6.96  | 7.49  | -1.45 | 0.0034 | 0.0124 ZNF736    | zinc finger protein 736                          | Multiple_Complex |
| TC1900012038.hg.1 | 7.31  | 6.68  | 1.54  | 0.0034 | 0.0124 LILRA6    | leukocyte immunoglobulin-like receptor, subf     | Multiple_Complex |
| TC1400006486.hg.1 | 4.59  | 4     | 1.5   | 0.0034 | 0.0124 OR4M1     | olfactory receptor, family 4, subfamily M, mer   | Coding           |
| TC1900009022.hg.1 | 4.8   | 5.43  | -1.55 | 0.0034 | 0.0124 ZNF135    | zinc finger protein 135                          | Multiple_Complex |
| TC0700011050.hg.1 | 4.38  | 5.06  | -1.59 | 0.0035 | 0.0125 FIGNL1    | figetin-like 1                                   | Multiple_Complex |
| TC0200012742.hg.1 | 11.49 | 10.37 | 2.17  | 0.0035 | 0.0125 XPO1      | exportin 1                                       | Multiple_Complex |
| TC1300008424.hg.1 | 8.4   | 9.14  | -1.67 | 0.0035 | 0.0125 USP12     | ubiquitin specific peptidase 12                  | Multiple_Complex |

|                      |       |       |       |        |                   |                                                 |                  |
|----------------------|-------|-------|-------|--------|-------------------|-------------------------------------------------|------------------|
| TC1600008940.hg.1    | 9.65  | 9.04  | 1.53  | 0.0035 | 0.0125 AXIN1      | Memczak2013 ALT_ACCEPTOR, ALT_DONOR,            | NonCoding        |
| TC0200009813.hg.1    | 6.98  | 6.51  | 1.39  | 0.0035 | 0.0125 PSMD14     | proteasome 26S subunit, non-ATPase 14           | Multiple_Complex |
| TC1100011107.hg.1    | 7.3   | 7.71  | -1.34 | 0.0035 | 0.0125 WDR74      | WD repeat domain 74                             | Multiple_Complex |
| TC1700012469.hg.1    | 13.49 | 14.13 | -1.56 | 0.0035 | 0.0125 SUMO2      | small ubiquitin-like modifier 2                 | Multiple_Complex |
| TC1900008141.hg.1    | 6.91  | 7.51  | -1.52 | 0.0035 | 0.0125 CYP25I     | cytochrome P450, family 2, subfamily S, polyp   | Multiple_Complex |
| TC1400008462.hg.1    | 4.1   | 3.65  | 1.37  | 0.0035 | 0.0125 C14orf79   | chromosome 14 open reading frame 79             | Multiple_Complex |
| TC0700006715.hg.1    | 6.28  | 7.05  | -1.71 | 0.0035 | 0.0126 PHF14      | PHD finger protein 14                           | Multiple_Complex |
| TC1400008590.hg.1    | 5.14  | 5.69  | -1.46 | 0.0035 | 0.0126 OSGEP      | O-sialoglycoprotein endopeptidase               | Multiple_Complex |
| TC1900011981.hg.1    | 5.55  | 6.34  | -1.72 | 0.0035 | 0.0126 ERCC2      | excision repair cross-complementation group     | Multiple_Complex |
| TC0500013377.hg.1    | 7.01  | 7.53  | -1.44 | 0.0035 | 0.0126 HARS       | histidyl-tRNA synthetase                        | Multiple_Complex |
| TC0200016369.hg.1    | 4.81  | 5.28  | -1.39 | 0.0035 | 0.0126 DTYMK      | deoxythymidylate kinase                         | Multiple_Complex |
| TC0700010924.hg.1    | 4.61  | 4.15  | 1.37  | 0.0035 | 0.0126 NPC1L1     | NPC1-like 1                                     | Multiple_Complex |
| TC0100018219.hg.1    | 11.22 | 11.75 | -1.44 | 0.0035 | 0.0126 PPC5; CCD  | (phosphopantothencycysteine synthetase; coi     | Multiple_Complex |
| TC1500007814.hg.1    | 5.02  | 5.86  | -1.79 | 0.0035 | 0.0127 NEO1       | neogenin 1                                      | Multiple_Complex |
| TC0100011200.hg.1    | 7.17  | 6.48  | 1.61  | 0.0035 | 0.0127 TIMM17A    | translocase of inner mitochondrial membrane     | Multiple_Complex |
| TC1300007148.hg.1    | 6.69  | 7.75  | -2.09 | 0.0035 | 0.0127 CYSLTR2    | cysteinyl leukotriene receptor 2                | Coding           |
| TC1400006508.hg.1    | 4.17  | 3.53  | 1.56  | 0.0035 | 0.0127 OR11H6     | olfactory receptor, family 11, subfamily H, me  | Coding           |
| TC0500009319.hg.1    | 9.35  | 9.87  | -1.44 | 0.0035 | 0.0127 CCNG1      | cyclin G1                                       | Multiple_Complex |
| TC1400010776.hg.1    | 4.87  | 5.54  | -1.59 | 0.0035 | 0.0127 CATSPERB   | catsper channel auxiliary subunit beta          | Multiple_Complex |
| TC0300012482.hg.1    | 7.2   | 6.39  | 1.75  | 0.0035 | 0.0127 RAB6B      | RAB6B, member RAS oncogene family               | Multiple_Complex |
| TC0300013707.hg.1    | 7.46  | 7.8   | -1.27 | 0.0035 | 0.0127 WDR53      | WD repeat domain 53                             | Coding           |
| TC0700010945.hg.1    | 5.59  | 5.03  | 1.48  | 0.0035 | 0.0128 NACAD      | NAC alpha domain containing                     | Multiple_Complex |
| TC0500012182.hg.1    | 9.69  | 9.05  | 1.57  | 0.0036 | 0.0128 HSPA9      | heat shock 70kDa protein 9 (mortalin)           | Multiple_Complex |
| TC0300010540.hg.1    | 9.55  | 10.25 | -1.62 | 0.0036 | 0.0128 TOP2B; MII | topoisomerase (DNA) II beta; microRNA 4442      | Multiple_Complex |
| TC0700007121.hg.1    | 7.32  | 8.07  | -1.68 | 0.0036 | 0.0128 AVL9       | AVL9 homolog (S. cerevisiae)                    | Multiple_Complex |
| TC1200008706.hg.1    | 10.87 | 11.53 | -1.58 | 0.0036 | 0.0128 KIAA1033   | KIAA1033                                        | Multiple_Complex |
| TC0100007532.hg.1    | 9.16  | 8.69  | 1.39  | 0.0036 | 0.0128 STX12      | syntaxin 12                                     | Multiple_Complex |
| TC1100007684.hg.1    | 6.89  | 9.17  | -4.85 | 0.0036 | 0.0128 SERPING1   | serpin peptidase inhibitor, clade G (C1 inhibit | Multiple_Complex |
| TC1700006522.hg.1    | 5     | 5.45  | -1.37 | 0.0036 | 0.0128 WDR81      | WD repeat domain 81                             | Multiple_Complex |
| TC0100014848.hg.1    | 7.94  | 8.34  | -1.32 | 0.0036 | 0.0129 CCB2; RBA  | cysteine conjugate-beta lyase 2; RNA binding i  | Multiple_Complex |
| TC0200006912.hg.1    | 4.2   | 3.73  | 1.38  | 0.0036 | 0.0129 TDRD15     | tudor domain containing 15                      | Multiple_Complex |
| TC0100017445.hg.1    | 10.66 | 9.61  | 2.06  | 0.0036 | 0.0129 TLR5       | toll-like receptor 5                            | Multiple_Complex |
| TC0200016605.hg.1    | 7.28  | 6.92  | 1.29  | 0.0036 | 0.0129 UBE2F-SCL  | UBE2F-SCLY readthrough (NMD candidate)          | Multiple_Complex |
| TC1400007673.hg.1    | 5.37  | 5     | 1.29  | 0.0036 | 0.0129 VRTN       | vertebrae development associated                | Multiple_Complex |
| TC0Y00007331.hg.1    | 4.16  | 3.77  | 1.31  | 0.0036 | 0.0129 CSPG4P1Y   | chondroitin sulfate proteoglycan 4 pseudogen    | Multiple_Complex |
| TC1200010705.hg.1    | 6.43  | 6.85  | -1.33 | 0.0036 | 0.0129 GALNT6     | polypeptide N-acetylgalactosaminyltransferas    | Multiple_Complex |
| TC1000008081.hg.1    | 6.83  | 7.63  | -1.74 | 0.0036 | 0.013 KAT6B       | K(lysine) acetyltransferase 6B                  | Multiple_Complex |
| TC0800009636.hg.1    | 4.29  | 3.55  | 1.67  | 0.0036 | 0.013 USP17L7     | ubiquitin specific peptidase 17-like family mer | Coding           |
| TC1400006723.hg.1    | 9.09  | 8.26  | 1.78  | 0.0036 | 0.013 REC8        | REC8 meiotic recombination protein              | Multiple_Complex |
| TC0300007408.hg.1    | 6.41  | 6.09  | 1.25  | 0.0036 | 0.013 GNAT1       | guanine nucleotide binding protein (G protein   | Multiple_Complex |
| TC1200008508.hg.1    | 6.58  | 7.06  | -1.39 | 0.0036 | 0.0131 VEZT       | vezatin, adherens junctions transmembrane p     | Multiple_Complex |
| TC0100017974.hg.1    | 8.63  | 9.16  | -1.44 | 0.0036 | 0.0131 CEP170     | centrosomal protein 170kDa                      | Multiple_Complex |
| TSUnmapped00000401.h | 10.22 | 10.97 | -1.68 | 0.0037 | 0.0131 INPP5D     | inositol polyphosphate-5-phosphatase D          | NonCoding        |
| TC1700009189.hg.1    | 7.93  | 7.36  | 1.48  | 0.0037 | 0.0131 HGS        | hepatocyte growth factor-regulated tyrosine k   | Multiple_Complex |
| TC1600009580.hg.1    | 7.97  | 8.43  | -1.38 | 0.0037 | 0.0131 XYLT1      | xylosyltransferase I                            | Multiple_Complex |
| TC1100010778.hg.1    | 4     | 3.52  | 1.39  | 0.0037 | 0.0131 OR4C5      | olfactory receptor, family 4, subfamily C, men  | Coding           |
| TC1700007677.hg.1    | 4.03  | 4.49  | -1.38 | 0.0037 | 0.0131 DUSP14     | dual specificity phosphatase 14                 | Coding           |
| TC0200014845.hg.1    | 5.22  | 4.48  | 1.66  | 0.0037 | 0.0131 SPC25      | SPC25, NDC80 kinetochore complex compone        | Multiple_Complex |
| TC0900009776.hg.1    | 7     | 7.4   | -1.31 | 0.0037 | 0.0132 MOB3B      | MOB kinase activator 3B                         | Multiple_Complex |
| TC1900008254.hg.1    | 4.86  | 5.4   | -1.46 | 0.0037 | 0.0132 ZNF234     | zinc finger protein 234                         | Multiple_Complex |
| TC0500008121.hg.1    | 6.13  | 6.48  | -1.28 | 0.0037 | 0.0132 ARSK       | arylsulfatase family, member K                  | Multiple_Complex |
| TC0100013902.hg.1    | 5.51  | 4.78  | 1.65  | 0.0037 | 0.0133 SVBP       | small vasohibin binding protein                 | Multiple_Complex |
| TC1900009999.hg.1    | 6.81  | 7.38  | -1.48 | 0.0037 | 0.0133 IL12RB1    | interleukin 12 receptor, beta 1                 | Multiple_Complex |
| TC1300008780.hg.1    | 5.25  | 4.87  | 1.3   | 0.0037 | 0.0133 SMIM2      | small integral membrane protein 2               | Coding           |
| TC0X00008495.hg.1    | 7.88  | 8.56  | -1.6  | 0.0037 | 0.0133 FAM127A    | family with sequence similarity 127, member     | Multiple_Complex |
| TC1100010038.hg.1    | 4.66  | 3.92  | 1.66  | 0.0037 | 0.0133 ST5        | suppression of tumorigenicity 5                 | Multiple_Complex |
| TC1900007436.hg.1    | 9.04  | 8.29  | 1.68  | 0.0037 | 0.0133 GATAD2A;   | GATA zinc finger domain containing 2A; micro    | Multiple_Complex |
| TC1200011491.hg.1    | 4.49  | 3.92  | 1.49  | 0.0037 | 0.0134 EPYC       | epiphycan                                       | Multiple_Complex |
| TC1400010765.hg.1    | 7.95  | 7.14  | 1.75  | 0.0037 | 0.0134 RDH11      | retinol dehydrogenase 11 (all-trans/9-cis/11-c  | Multiple_Complex |
| TC0X00007392.hg.1    | 9.33  | 10.06 | -1.66 | 0.0038 | 0.0134 UBQLN2     | ubiquilin 2                                     | Coding           |
| TC0600008670.hg.1    | 4.43  | 3.96  | 1.39  | 0.0038 | 0.0134 PRSS35     | protease, serine 35                             | Coding           |
| TC1900007045.hg.1    | 4.76  | 5.3   | -1.46 | 0.0038 | 0.0134 ZNF441     | zinc finger protein 441                         | Multiple_Complex |
| TC0100011953.hg.1    | 6.95  | 7.71  | -1.7  | 0.0038 | 0.0134 ARV1       | ARV1 homolog, fatty acid homeostasis modul      | Multiple_Complex |
| TC1900010164.hg.1    | 8.86  | 9.36  | -1.42 | 0.0038 | 0.0134 ZNF208     | zinc finger protein 208                         | Multiple_Complex |
| TC1000010831.hg.1    | 10.64 | 11.13 | -1.41 | 0.0038 | 0.0134 HERC4      | HECT and RLD domain containing E3 ubiquitin     | Multiple_Complex |
| TC1100008006.hg.1    | 4.04  | 3.84  | 1.15  | 0.0038 | 0.0134 SLC22A20   | solute carrier family 22, member 20             | Multiple_Complex |
| TC1000008743.hg.1    | 4.89  | 5.37  | -1.4  | 0.0038 | 0.0134 SUFU       | Transcript Identified by AceView, Entrez Gene   | Unassigned       |
| TC0900006762.hg.1    | 6.11  | 5.49  | 1.54  | 0.0038 | 0.0135 ACER2      | alkaline ceramidase 2                           | Multiple_Complex |
| TC1200008916.hg.1    | 9.6   | 9.15  | 1.37  | 0.0038 | 0.0136 PTPN11     | protein tyrosine phosphatase, non-receptor ty   | Multiple_Complex |
| TC1200009209.hg.1    | 6.26  | 6.79  | -1.44 | 0.0038 | 0.0136 KNTC1      | kinetochore associated 1                        | Multiple_Complex |

|                      |       |       |       |        |                         |                                                             |                  |
|----------------------|-------|-------|-------|--------|-------------------------|-------------------------------------------------------------|------------------|
| TC1100006695.hg.1    | 3.7   | 3     | 1.62  | 0.0038 | 0.0136 OR5112           | olfactory receptor, family 51, subfamily I, member 12       | Coding           |
| TC0500007738.hg.1    | 4.32  | 3.85  | 1.38  | 0.0038 | 0.0136 MAP1B            | microtubule associated protein 1B                           | Multiple_Complex |
| TC0500012909.hg.1    | 5.53  | 5.27  | 1.2   | 0.0038 | 0.0136 DRD1             | dopamine receptor D1                                        | Coding           |
| TC1200011894.hg.1    | 6.99  | 6.23  | 1.69  | 0.0038 | 0.0136 C12orf76         | chromosome 12 open reading frame 76                         | Multiple_Complex |
| TC0500010600.hg.1    | 5.49  | 6.38  | -1.85 | 0.0038 | 0.0137 OXCT1            | Transcript Identified by AceView, Entrez Gene               | Unassigned       |
| TC2200009347.hg.1    | 4.53  | 4.93  | -1.32 | 0.0038 | 0.0137 ANKRD54; MIR5038 | ankyrin repeat domain 54; microRNA 658                      | Multiple_Complex |
| TC0800012168.hg.1    | 6.48  | 6.05  | 1.35  | 0.0038 | 0.0137 NRBP2; MIR5038   | nuclear receptor binding protein 2; microRNA 658            | Multiple_Complex |
| TC1200010448.hg.1    | 6.64  | 7.19  | -1.46 | 0.0038 | 0.0137 GXYLT1           | glucoside xylosyltransferase 1                              | Multiple_Complex |
| TC1600009184.hg.1    | 5.07  | 5.81  | -1.67 | 0.0038 | 0.0137 ZNF200           | Transcript Identified by AceView, Entrez Gene               | Unassigned       |
| TC1500008269.hg.1    | 4.98  | 4.48  | 1.41  | 0.0038 | 0.0137 KIF7             | Memczak2013 ANTISENSE, CDS, coding, INTEF                   | NonCoding        |
| TC2000007227.hg.1    | 7.89  | 7.54  | 1.28  | 0.0038 | 0.0137 ROMO1            | reactive oxygen species modulator 1                         | Multiple_Complex |
| TC1500008971.hg.1    | 4.89  | 5.14  | -1.19 | 0.0038 | 0.0137 AVEN             | apoptosis, caspase activation inhibitor                     | Multiple_Complex |
| TC1800008128.hg.1    | 9.68  | 8.99  | 1.62  | 0.0038 | 0.0137 PTPN2            | protein tyrosine phosphatase, non-receptor type 2           | Multiple_Complex |
| TSUnmapped00000292.h | 4.54  | 4     | 1.46  | 0.0039 | 0.0137 TGM4             | transglutaminase 4                                          | Coding           |
| TC2000007503.hg.1    | 5.49  | 5.04  | 1.36  | 0.0039 | 0.0137 UBE2C            | ubiquitin-conjugating enzyme E2C                            | Multiple_Complex |
| TSUnmapped00000493.h | 6.95  | 6.38  | 1.48  | 0.0039 | 0.0137 TRAPPC4          | trafficking protein particle complex 4                      | Coding           |
| TC0600007887.hg.1    | 13.12 | 12.28 | 1.79  | 0.0039 | 0.0137 ZFAND3           | zinc finger, AN1-type domain 3                              | Multiple_Complex |
| TC0700013602.hg.1    | 11.46 | 12.04 | -1.5  | 0.0039 | 0.0137 POLR2J3          | polymerase (RNA) II (DNA directed) polypeptide 2, j3        | Multiple_Complex |
| TC1600011300.hg.1    | 3.76  | 4.1   | -1.26 | 0.0039 | 0.0138 CENPBD1          | CENPB DNA-binding domain containing 1                       | Multiple_Complex |
| TC1100009445.hg.1    | 5.96  | 6.48  | -1.43 | 0.0039 | 0.0138 FAM118B          | family with sequence similarity 118, member B               | Multiple_Complex |
| TC1800007355.hg.1    | 4.12  | 4.82  | -1.63 | 0.0039 | 0.0138 C18orf54         | chromosome 18 open reading frame 54                         | Multiple_Complex |
| TC0100015627.hg.1    | 6.5   | 7     | -1.41 | 0.0039 | 0.0138 PRKAB2           | protein kinase, AMP-activated, beta 2 non-catalytic subunit | Multiple_Complex |
| TC0300008711.hg.1    | 6.03  | 5.45  | 1.49  | 0.0039 | 0.0138 KBTBD12          | kelch repeat and BTB (POZ) domain containing 12             | Multiple_Complex |
| TC2200009346.hg.1    | 5.37  | 5.71  | -1.27 | 0.0039 | 0.0139 C1QTNF6          | C1q and tumor necrosis factor related protein 6             | NonCoding        |
| TC1400009668.hg.1    | 9.74  | 8.95  | 1.72  | 0.0039 | 0.0139 PNMA1            | paraneoplastic Ma antigen 1                                 | Coding           |
| TC1900007869.hg.1    | 7.76  | 8.54  | -1.72 | 0.0039 | 0.0139 RBM42            | RNA binding motif protein 42                                | Multiple_Complex |
| TC0600014154.hg.1    | 7.26  | 7.79  | -1.45 | 0.0039 | 0.0139 SLC35A1          | solute carrier family 35 (CMP-sialic acid transporter)      | Multiple_Complex |
| TC1200009748.hg.1    | 7.73  | 8.45  | -1.65 | 0.0039 | 0.0139 ZNF384           | zinc finger protein 384                                     | Multiple_Complex |
| TC0600014069.hg.1    | 8.47  | 8.9   | -1.34 | 0.0039 | 0.0139 TMEM14B          | transmembrane protein 14B                                   | Multiple_Complex |
| TC0900011454.hg.1    | 5.8   | 6.6   | -1.74 | 0.0039 | 0.014 ZBTB26            | zinc finger and BTB domain containing 26                    | Coding           |
| TC1500010842.hg.1    | 6.19  | 7.02  | -1.77 | 0.0039 | 0.014 GOLGA8R           | golgin A8 family, member R                                  | Multiple_Complex |
| TC0X00008689.hg.1    | 5.2   | 4.7   | 1.41  | 0.0039 | 0.014 MAGEA11           | MAGE family member A11                                      | Multiple_Complex |
| TC1200011862.hg.1    | 7.4   | 8     | -1.51 | 0.0039 | 0.014 ALKBH2            | alkB homolog 2, alpha-ketoglutarate-dependent demethylase   | Multiple_Complex |
| TC1200009489.hg.1    | 4.6   | 5.43  | -1.77 | 0.0039 | 0.014 FBRSL1            | fibrosin-like 1                                             | Multiple_Complex |
| TC0400008165.hg.1    | 4.69  | 4.25  | 1.35  | 0.0039 | 0.014 ATOH1             | atonal bHLH transcription factor 1                          | Coding           |
| TC0800006864.hg.1    | 8.46  | 9.33  | -1.83 | 0.004  | 0.014 ZDHHC2            | zinc finger, DHHC-type containing 2                         | Multiple_Complex |
| TC0400010606.hg.1    | 7.7   | 7.14  | 1.48  | 0.004  | 0.014 COMMD8            | COMM domain containing 8                                    | Multiple_Complex |
| TC1500006972.hg.1    | 6.8   | 7.66  | -1.82 | 0.004  | 0.014 SPINT1            | serine peptidase inhibitor, Kunitz type 1                   | Multiple_Complex |
| TC0300013918.hg.1    | 5.68  | 5.26  | 1.34  | 0.004  | 0.0141 SLC51A           | solute carrier family 51, alpha subunit                     | Multiple_Complex |
| TC0900011209.hg.1    | 5.53  | 4.84  | 1.62  | 0.004  | 0.0141 C9orf84          | chromosome 9 open reading frame 84                          | Multiple_Complex |
| TC1700010592.hg.1    | 9.06  | 9.71  | -1.57 | 0.004  | 0.0141 ORMDL3           | ORMDL sphingolipid biosynthesis regulator 3                 | Multiple_Complex |
| TC0300008369.hg.1    | 10.61 | 9.86  | 1.69  | 0.004  | 0.0141 ATP6V1A          | ATPase, H+ transporting, lysosomal 70kDa, V1 isoform        | Multiple_Complex |
| TC0700008003.hg.1    | 7.05  | 6.5   | 1.47  | 0.004  | 0.0141 CLIP2            | CAP-GLY domain containing linker protein 2                  | Multiple_Complex |
| TC0200010834.hg.1    | 8.11  | 8.7   | -1.5  | 0.004  | 0.0141 FAM134A          | family with sequence similarity 134, member A               | Multiple_Complex |
| TC0500007772.hg.1    | 10.81 | 9.28  | 2.89  | 0.004  | 0.0141 BTF3             | basic transcription factor 3                                | Multiple_Complex |
| TC1600010262.hg.1    | 8.95  | 9.46  | -1.42 | 0.004  | 0.0142 BRD7             | bromodomain containing 7                                    | Multiple_Complex |
| TC0600009143.hg.1    | 5.55  | 6.1   | -1.46 | 0.004  | 0.0142 SLC16A10         | solute carrier family 16 (aromatic amino acid transporter)  | Multiple_Complex |
| TC1500010777.hg.1    | 4.99  | 4.3   | 1.61  | 0.004  | 0.0142 IL16             | interleukin 16                                              | NonCoding        |
| TC0100008156.hg.1    | 6.57  | 7.29  | -1.65 | 0.004  | 0.0142 NSUN4            | NOP2/Sun domain family, member 4                            | Multiple_Complex |
| TC0700008095.hg.1    | 7.16  | 7.55  | -1.31 | 0.004  | 0.0142 DTX2             | deltex 2, E3 ubiquitin ligase                               | Multiple_Complex |
| TC0300008962.hg.1    | 4.45  | 4.05  | 1.32  | 0.004  | 0.0143 FOXL2NB          | FOXL2 neighbor                                              | Multiple_Complex |
| TC1100010712.hg.1    | 10    | 10.97 | -1.96 | 0.004  | 0.0143 ARHGAP1          | Rho GTPase activating protein 1                             | Multiple_Complex |
| TC1100012052.hg.1    | 8.81  | 7.55  | 2.4   | 0.004  | 0.0143 CCDC82           | coiled-coil domain containing 82                            | Multiple_Complex |
| TSUnmapped00000569.h | 8.49  | 7.94  | 1.46  | 0.004  | 0.0143 ZDHHC2           | zinc finger, DHHC-type containing 3                         | Coding           |
| TC1200007714.hg.1    | 3.49  | 3.16  | 1.26  | 0.004  | 0.0143 AMHR2            | anti-Mullerian hormone receptor, type II                    | Multiple_Complex |
| TC0200015714.hg.1    | 13.33 | 14.81 | -2.78 | 0.0041 | 0.0143 CXCR1            | chemokine (C-X-C motif) receptor 1                          | Multiple_Complex |
| TC0X00011288.hg.1    | 4.01  | 3.31  | 1.62  | 0.0041 | 0.0144 GAGE12I; GAGE12F | G antigen 12I; G antigen 12F                                | Coding           |
| TC0900010878.hg.1    | 5.16  | 5.71  | -1.46 | 0.0041 | 0.0144 FANCC            | Fanconi anemia complementation group C                      | Multiple_Complex |
| TC1600009642.hg.1    | 10.58 | 9.6   | 1.97  | 0.0041 | 0.0144 GDE1             | glycerophosphodiester phosphodiesterase 1                   | Multiple_Complex |
| TC1300009810.hg.1    | 10.3  | 9.7   | 1.51  | 0.0041 | 0.0144 ANKRD10          | ankyrin repeat domain 10                                    | Multiple_Complex |
| TCUn_GL000219v100006 | 6.51  | 7.02  | -1.43 | 0.0041 | 0.0144 LOC28378&FSDH    | region gene 1 pseudogene                                    | Multiple_Complex |
| TC0100015608.hg.1    | 6.46  | 6.89  | -1.34 | 0.0041 | 0.0144 LOC105371&FSDH   | peptidyl-prolyl cis-trans isomerase A-like 4G; FSDH         | Coding           |
| TC0800011472.hg.1    | 5.56  | 6.48  | -1.89 | 0.0041 | 0.0144 NUDCD1           | NudC domain containing 1                                    | Multiple_Complex |
| TC0200007473.hg.1    | 9.35  | 9.62  | -1.21 | 0.0041 | 0.0144 CRIPT            | cysteine-rich PDZ-binding protein                           | Multiple_Complex |
| TC1900009594.hg.1    | 5.46  | 4.89  | 1.49  | 0.0041 | 0.0145 ZNF812P          | zinc finger protein 812, pseudogene                         | Multiple_Complex |
| TC1100009917.hg.1    | 19.36 | 19.66 | -1.23 | 0.0041 | 0.0145 HBB              | hemoglobin, beta                                            | Multiple_Complex |
| TC1400010579.hg.1    | 5.5   | 5.89  | -1.31 | 0.0041 | 0.0145 DHRS4            | dehydrogenase/reductase (SDR family) member 4               | Coding           |
| TC0700007399.hg.1    | 14.52 | 13.13 | 2.63  | 0.0041 | 0.0145 PPIA             | peptidylprolyl isomerase A (cyclophilin A)                  | Multiple_Complex |
| TC1700012186.hg.1    | 7.65  | 8.36  | -1.63 | 0.0041 | 0.0145 TNFSF13          | tumor necrosis factor (ligand) superfamily, member 13       | Multiple_Complex |
| TC0600013350.hg.1    | 7.59  | 8.25  | -1.58 | 0.0041 | 0.0145 REPS1            | RALBP1 associated Eps domain containing 1                   | Multiple_Complex |

|                      |       |       |       |        |                   |                                                 |                  |
|----------------------|-------|-------|-------|--------|-------------------|-------------------------------------------------|------------------|
| TC1900011464.hg.1    | 5.43  | 6.2   | -1.7  | 0.0041 | 0.0145 TMEM150f   | transmembrane protein 150B                      | Multiple_Complex |
| TC2200008000.hg.1    | 5.98  | 5.57  | 1.33  | 0.0041 | 0.0145 TXNRD2     | Transcript Identified by AceView, Entrez Gene   | Coding           |
| TC1700012226.hg.1    | 6.47  | 6.89  | -1.34 | 0.0041 | 0.0145 ADAP2      | ArfGAP with dual PH domains 2                   | Multiple_Complex |
| TC1500010855.hg.1    | 5.07  | 5.5   | -1.35 | 0.0041 | 0.0146 EPB42      | erythrocyte membrane protein band 4.2           | NonCoding        |
| TC0500013241.hg.1    | 3.85  | 3.4   | 1.36  | 0.0041 | 0.0146 PCDH85     | protocadherin beta 5                            | Coding           |
| TC0200014735.hg.1    | 9.91  | 9.01  | 1.87  | 0.0041 | 0.0146 RBMS1; MI  | RNA binding motif, single stranded interacting  | Multiple_Complex |
| TC0400012640.hg.1    | 3.97  | 3.49  | 1.4   | 0.0041 | 0.0146 CCDC110    | coiled-coil domain containing 110               | Coding           |
| TC1800008231.hg.1    | 9     | 8.37  | 1.56  | 0.0042 | 0.0146 ESCO1      | establishment of sister chromatid cohesion N-   | Multiple_Complex |
| TC1400010730.hg.1    | 4.87  | 4.23  | 1.56  | 0.0042 | 0.0147 EGLN3      | egl-9 family hypoxia-inducible factor 3         | Multiple_Complex |
| TC0900011841.hg.1    | 6.47  | 5.81  | 1.58  | 0.0042 | 0.0147 SURF1      | surfeit 1                                       | Multiple_Complex |
| TC1200007147.hg.1    | 4.74  | 3.93  | 1.76  | 0.0042 | 0.0147 ARNTL2     | aryl hydrocarbon receptor nuclear translocato   | Multiple_Complex |
| TC1000010562.hg.1    | 5.21  | 4.96  | 1.19  | 0.0042 | 0.0147 SYT15; ABC | Homo sapiens synaptotagmin XV (SYT15), trar     | Coding           |
| TC1100011311.hg.1    | 4.67  | 5.06  | -1.31 | 0.0042 | 0.0147 PC         | Memczak2013 ALT_ACCEPTOR, ALT_DONOR,            | NonCoding        |
| TC1600009978.hg.1    | 4.72  | 5.26  | -1.46 | 0.0042 | 0.0147 ZNF785     | zinc finger protein 785                         | Coding           |
| TC0300006956.hg.1    | 6     | 6.45  | -1.37 | 0.0042 | 0.0148 GPD1L      | glycerol-3-phosphate dehydrogenase 1-like       | Multiple_Complex |
| TC2200009335.hg.1    | 9.91  | 9.19  | 1.65  | 0.0042 | 0.0148 THOC5      | THO complex 5                                   | Multiple_Complex |
| TC1900006999.hg.1    | 11.67 | 11.12 | 1.46  | 0.0042 | 0.0148 DNM2       | Transcript Identified by AceView, Entrez Gene   | Unassigned       |
| TC0300011247.hg.1    | 4.68  | 4.4   | 1.22  | 0.0042 | 0.0148 WNT5A      | wingless-type MMTV integration site family, n   | Multiple_Complex |
| TC0600007616.hg.1    | 8.38  | 9.06  | -1.6  | 0.0042 | 0.0148 HSPA1B; H! | heat shock 70kDa protein 1B; heat shock 70k     | Coding           |
| TC1400006697.hg.1    | 4.74  | 4.27  | 1.38  | 0.0042 | 0.0148 DHRS2      | dehydrogenase/reductase (SDR family) memb       | Multiple_Complex |
| TSUnmapped00000107.h | 6.43  | 7.23  | -1.74 | 0.0042 | 0.0149 DUSP16     | dual specificity phosphatase 16                 | Coding           |
| TC0300014034.hg.1    | 6.74  | 6.11  | 1.55  | 0.0042 | 0.0149 COX17      | COX17 cytochrome c oxidase copper chaperon      | Multiple_Complex |
| TC1100009859.hg.1    | 9.24  | 8.85  | 1.32  | 0.0043 | 0.0149 NUP98      | Transcript Identified by AceView, Entrez Gene   | Unassigned       |
| TC1500010728.hg.1    | 7.28  | 6.58  | 1.62  | 0.0043 | 0.015 SERF2       | small EDRK-rich factor 2                        | Multiple_Complex |
| TC0700012847.hg.1    | 3.87  | 3.45  | 1.34  | 0.0043 | 0.015 PRSS37      | protease, serine, 37                            | Coding           |
| TC1600010006.hg.1    | 5.97  | 5.62  | 1.28  | 0.0043 | 0.015 PRSS8       | protease, serine, 8                             | Multiple_Complex |
| TC1100009618.hg.1    | 4.89  | 5.63  | -1.67 | 0.0043 | 0.015 GLB1L2      | galactosidase beta 1 like 2                     | Multiple_Complex |
| TC1000009920.hg.1    | 8.87  | 8.2   | 1.59  | 0.0043 | 0.015 VIM-AS1     | VIM antisense RNA 1                             | NonCoding        |
| TC1800008804.hg.1    | 4.83  | 4.23  | 1.51  | 0.0043 | 0.015 ALPK2       | alpha kinase 2                                  | Multiple_Complex |
| TC0900011654.hg.1    | 7.21  | 8.03  | -1.77 | 0.0043 | 0.015 ZDHHC12     | zinc finger, DHHC-type containing 12            | Multiple_Complex |
| TC1000008770.hg.1    | 6.67  | 7.11  | -1.35 | 0.0043 | 0.015 PDCD11      | programmed cell death 11                        | Multiple_Complex |
| TC0400012916.hg.1    | 6.85  | 7.24  | -1.32 | 0.0043 | 0.015 ARAP2       | ArfGAP with RhoGAP domain, ankyrin repeat       | NonCoding        |
| TC0700006565.hg.1    | 5.36  | 4.72  | 1.55  | 0.0043 | 0.0151 IQCE       | IQ motif containing E                           | Multiple_Complex |
| TC0100007469.hg.1    | 10.73 | 9.92  | 1.74  | 0.0043 | 0.0151 RPS6KA1    | ribosomal protein S6 kinase, 90kDa, polypepti   | Multiple_Complex |
| TC0800012395.hg.1    | 5.08  | 5.53  | -1.37 | 0.0043 | 0.0151 ZNF395     | zinc finger protein 395                         | Multiple_Complex |
| TC0Y00006861.hg.1    | 5.03  | 5.61  | -1.5  | 0.0043 | 0.0151 GTPBP6     | Homo sapiens GTP binding protein 6 (putative    | Multiple_Complex |
| TC0600014186.hg.1    | 6.64  | 7.44  | -1.74 | 0.0043 | 0.0151 PEX3       | peroxisomal biogenesis factor 3                 | Multiple_Complex |
| TC0100014576.hg.1    | 4.43  | 3.96  | 1.39  | 0.0043 | 0.0151 PTGER3     | prostaglandin E receptor 3 (subtype EP3)        | Multiple_Complex |
| TC0300006948.hg.1    | 4.97  | 5.74  | -1.71 | 0.0043 | 0.0152 ZNF860     | zinc finger protein 860                         | Multiple_Complex |
| TC1500007240.hg.1    | 12.01 | 10.94 | 2.1   | 0.0043 | 0.0152 TMOD3      | tropomodulin 3 (ubiquitous)                     | Multiple_Complex |
| TC2100006960.hg.1    | 11.38 | 10.84 | 1.45  | 0.0043 | 0.0152 IFNAR1     | interferon (alpha, beta and omega) receptor 1   | Multiple_Complex |
| TC0500011602.hg.1    | 5.81  | 6.72  | -1.88 | 0.0043 | 0.0152 GIN1       | gypsy retrotransposon integrase 1               | Multiple_Complex |
| TC0700010538.hg.1    | 13.17 | 12.4  | 1.71  | 0.0043 | 0.0152 HNRNPA2B   | heterogeneous nuclear ribonucleoprotein A2/     | Multiple_Complex |
| TC1900011449.hg.1    | 4.71  | 4.18  | 1.44  | 0.0044 | 0.0152 TNNT1      | troponin T type 1 (skeletal, slow)              | Multiple_Complex |
| TC1500010688.hg.1    | 4.57  | 4.01  | 1.47  | 0.0044 | 0.0152 OR4N4      | olfactory receptor, family 4, subfamily N, men  | Coding           |
| TC0Y00007341.hg.1    | 4.44  | 3.65  | 1.72  | 0.0044 | 0.0152 RBMY1E; R  | RNA binding motif protein, Y-linked, family 1,  | Coding           |
| TC1900011859.hg.1    | 4.18  | 3.81  | 1.29  | 0.0044 | 0.0153 ZNF846     | zinc finger protein 846                         | NonCoding        |
| TC1100006713.hg.1    | 4.41  | 3.64  | 1.7   | 0.0044 | 0.0153 OR56A3     | olfactory receptor, family 56, subfamily A, me  | Coding           |
| TC0100015866.hg.1    | 12.33 | 11.14 | 2.29  | 0.0044 | 0.0153 S100A4     | S100 calcium binding protein A4                 | Multiple_Complex |
| TC0200013283.hg.1    | 6.34  | 6.77  | -1.35 | 0.0044 | 0.0154 TMEM150/   | transmembrane protein 150A                      | Multiple_Complex |
| TC0800010987.hg.1    | 5.25  | 4.86  | 1.31  | 0.0044 | 0.0154 C8orf59    | chromosome 8 open reading frame 59              | Multiple_Complex |
| TC1900009754.hg.1    | 6.18  | 7.07  | -1.85 | 0.0044 | 0.0154 DNASE2     | deoxyribonuclease II, lysosomal                 | Multiple_Complex |
| TC0600007472.hg.1    | 4.01  | 3.41  | 1.51  | 0.0044 | 0.0154 OR2H2      | olfactory receptor, family 2, subfamily H, men  | Coding           |
| TC2200009303.hg.1    | 4.21  | 3.87  | 1.27  | 0.0044 | 0.0154 MAPK8IP2   | mitogen-activated protein kinase 8 interacting  | Coding           |
| TC0700010697.hg.1    | 6.57  | 7.16  | -1.51 | 0.0044 | 0.0154 RP9        | retinitis pigmentosa 9 (autosomal dominant)     | Multiple_Complex |
| TC0400012990.hg.1    | 14.1  | 15.84 | -3.34 | 0.0044 | 0.0154 DDX60L     | DEAD (Asp-Glu-Ala-Asp) box polypeptide 60-li    | Multiple_Complex |
| TC1200011993.hg.1    | 7.97  | 8.73  | -1.69 | 0.0044 | 0.0155 SLC8B1     | solute carrier family 8 (sodium/lithium/calciur | Multiple_Complex |
| TC1900008555.hg.1    | 6.91  | 7.5   | -1.5  | 0.0044 | 0.0155 AP2A1      | adaptor-related protein complex 2, alpha 1 su   | Multiple_Complex |
| TC1400010627.hg.1    | 9.95  | 10.41 | -1.37 | 0.0044 | 0.0155 YLPM1      | YLP motif containing 1                          | Multiple_Complex |
| TC1600006469.hg.1    | 7.2   | 7.52  | -1.24 | 0.0044 | 0.0155 CAPN15; M  | calpain 15; microRNA 5587                       | Multiple_Complex |
| TC1200008667.hg.1    | 5.66  | 6.56  | -1.86 | 0.0044 | 0.0155 HSP90B1    | Transcript Identified by AceView, Entrez Gene   | Unassigned       |
| TC0400012977.hg.1    | 5.35  | 4.89  | 1.38  | 0.0044 | 0.0155 SH3D19     | SH3 domain containing 19                        | Multiple_Complex |
| TC0400007789.hg.1    | 4.49  | 5.51  | -2.03 | 0.0045 | 0.0156 RUFY3      | RUN and FYVE domain containing 3                | Multiple_Complex |
| TC2100007331.hg.1    | 5.52  | 6.3   | -1.72 | 0.0045 | 0.0156 AGPAT3     | 1-acylglycerol-3-phosphate O-acyltransferase    | Multiple_Complex |
| TC0700012898.hg.1    | 5.52  | 5.89  | -1.29 | 0.0045 | 0.0156 TCAF1      | TRPM8 channel-associated factor 1               | Multiple_Complex |
| TC2000007666.hg.1    | 9.32  | 9.84  | -1.43 | 0.0045 | 0.0156 RNF114     | ring finger protein 114                         | Multiple_Complex |
| TC1600008899.hg.1    | 5.78  | 6.41  | -1.54 | 0.0045 | 0.0156 ZNF276     | zinc finger protein 276                         | Multiple_Complex |
| TC0900012216.hg.1    | 4.62  | 4.07  | 1.46  | 0.0045 | 0.0156 IFNA17     | interferon, alpha 17                            | Coding           |
| TC1100007808.hg.1    | 7.25  | 7.82  | -1.48 | 0.0045 | 0.0156 SDHAF2     | Memczak2013 ALT_ACCEPTOR, ALT_DONOR,            | NonCoding        |
| TC0700010565.hg.1    | 4.43  | 4.19  | 1.19  | 0.0045 | 0.0157 HOXA11     | homeobox A11                                    | Coding           |

|                      |       |       |       |        |                  |                                                    |                  |
|----------------------|-------|-------|-------|--------|------------------|----------------------------------------------------|------------------|
| TC0100017223.hg.1    | 9.72  | 8.89  | 1.78  | 0.0045 | 0.0157 LPGAT1    | lysophosphatidylglycerol acyltransferase 1         | Multiple_Complex |
| TC0200016477.hg.1    | 7.63  | 8.06  | -1.35 | 0.0045 | 0.0157 INO80B-WI | INO80B-WBP1 readthrough (NMD candidate)            | Multiple_Complex |
| TC0200011121.hg.1    | 11.74 | 12.17 | -1.35 | 0.0045 | 0.0157 INPP5D    | inositol polyphosphate-5-phosphatase D             | Multiple_Complex |
| TC0200014244.hg.1    | 4.47  | 4.18  | 1.22  | 0.0045 | 0.0157 FAR2P1    | fatty acyl-CoA reductase 2 pseudogene 1            | Multiple_Complex |
| TC2200008091.hg.1    | 7.59  | 8.12  | -1.44 | 0.0045 | 0.0158 PI4KAP2   | phosphatidylinositol 4-kinase, catalytic, alpha    | Multiple_Complex |
| TC0500009610.hg.1    | 9.37  | 9.87  | -1.42 | 0.0045 | 0.0158 NSD1      | nuclear receptor binding SET domain protein 1      | Multiple_Complex |
| TC1900006470.hg.1    | 12.48 | 13.92 | -2.71 | 0.0045 | 0.0158 BSG       | basigin (OK blood group)                           | Multiple_Complex |
| TC0200014154.hg.1    | 3.68  | 4.52  | -1.79 | 0.0045 | 0.0158 GYPC      | Memczak2013 ANTISENSE, coding, INTERNAL, NonCoding |                  |
| TC0500013144.hg.1    | 4.99  | 5.53  | -1.45 | 0.0045 | 0.0158 CEP72     | centrosomal protein 72kDa                          | Multiple_Complex |
| TC0300010989.hg.1    | 4.4   | 3.79  | 1.54  | 0.0046 | 0.0158 CSPG5     | chondroitin sulfate proteoglycan 5 (neuroglyc      | Multiple_Complex |
| TC1500010234.hg.1    | 6.18  | 6.94  | -1.7  | 0.0046 | 0.0159 EFTUD1    | elongation factor Tu GTP binding domain cont       | Multiple_Complex |
| TC0700010604.hg.1    | 9.27  | 10.29 | -2.04 | 0.0046 | 0.0159 CPVL      | carboxypeptidase, vitellogenin-like                | Multiple_Complex |
| TC0600008912.hg.1    | 4.73  | 4.36  | 1.29  | 0.0046 | 0.0159 PRDM13    | PR domain containing 13                            | Coding           |
| TC1300008179.hg.1    | 8.92  | 9.57  | -1.57 | 0.0046 | 0.0159 UPF3A     | UPF3 regulator of nonsense transcripts homol       | Multiple_Complex |
| TC1500008470.hg.1    | 7.37  | 6.54  | 1.78  | 0.0046 | 0.0159 ARDC4     | arrestin domain containing 4                       | Coding           |
| TC2200006450.hg.1    | 3.98  | 3.37  | 1.53  | 0.0046 | 0.0159 OR11H1    | olfactory receptor, family 11, subfamily H, me     | Coding           |
| TC0900008490.hg.1    | 4.84  | 4.41  | 1.35  | 0.0046 | 0.016 C9orf43    | chromosome 9 open reading frame 43                 | Multiple_Complex |
| TC1000012474.hg.1    | 5.36  | 5.89  | -1.44 | 0.0046 | 0.016 NUTM2D     | NUT family member 2D                               | Multiple_Complex |
| TC0400009897.hg.1    | 5.02  | 5.69  | -1.59 | 0.0046 | 0.016 JAKMIP1    | janus kinase and microtubule interacting prot      | Multiple_Complex |
| TC0300006561.hg.1    | 7     | 7.41  | -1.32 | 0.0046 | 0.016 JAGN1      | jagunal homolog 1                                  | Multiple_Complex |
| TC0700010181.hg.1    | 5.43  | 4.8   | 1.55  | 0.0046 | 0.016 RSPH10B2;  | radial spoke head 10 homolog B2 (Chlamydon         | Multiple_Complex |
| TC1200012575.hg.1    | 5.89  | 6.51  | -1.53 | 0.0046 | 0.016 DYRK4      | dual specificity tyrosine-(Y)-phosphorylation r    | Multiple_Complex |
| TC1200012700.hg.1    | 9.97  | 9.28  | 1.62  | 0.0046 | 0.016 C12orf75   | chromosome 12 open reading frame 75                | Multiple_Complex |
| TC0100007575.hg.1    | 8.66  | 9.21  | -1.46 | 0.0046 | 0.016 EPB41      | Memczak2013 ALT_ACCEPTOR, ALT_DONOR, NonCoding     |                  |
| TC1100006629.hg.1    | 7.37  | 6.63  | 1.67  | 0.0046 | 0.016 ART1       | ADP-ribosyltransferase 1                           | Multiple_Complex |
| TC1700011703.hg.1    | 6.86  | 6.37  | 1.41  | 0.0046 | 0.0161 CD300LD   | CD300 molecule-like family member d                | Coding           |
| TC1200011608.hg.1    | 11.97 | 12.43 | -1.37 | 0.0046 | 0.0161 CDK17     | cyclin-dependent kinase 17                         | Multiple_Complex |
| TC1700006999.hg.1    | 4.65  | 4.49  | 1.12  | 0.0046 | 0.0161 ADORA2B   | adenosine A2b receptor                             | Multiple_Complex |
| TC0100011733.hg.1    | 10.05 | 10.4  | -1.27 | 0.0046 | 0.0161 FBXO28    | F-box protein 28                                   | Multiple_Complex |
| TSUnmapped00000050.h | 7.47  | 8.19  | -1.65 | 0.0046 | 0.0161 MLXIP     | MLX interacting protein                            | Coding           |
| TC0400009111.hg.1    | 4.52  | 3.88  | 1.56  | 0.0047 | 0.0161 GRIA2     | Transcript Identified by AceView, Entrez Gene      | Unassigned       |
| TC1700006721.hg.1    | 6.85  | 7.15  | -1.24 | 0.0047 | 0.0162 SLC16A13  | solute carrier family 16, member 13                | Multiple_Complex |
| TC1100011629.hg.1    | 5.05  | 5.79  | -1.67 | 0.0047 | 0.0162 XRR1A     | X-ray radiation resistance associated 1            | Multiple_Complex |
| TC1700007642.hg.1    | 4.08  | 4.46  | -1.31 | 0.0047 | 0.0162 MRM1      | mitochondrial rRNA methyltransferase 1             | Multiple_Complex |
| TC1600008737.hg.1    | 4.03  | 3.5   | 1.44  | 0.0047 | 0.0163 FLJ30679; | uncharacterized protein FLJ30679; uncharacte       | NonCoding        |
| TC1900012033.hg.1    | 4.35  | 4.85  | -1.41 | 0.0047 | 0.0163 ZNF347    | zinc finger protein 347                            | Multiple_Complex |
| TC0200012499.hg.1    | 7.75  | 7.01  | 1.67  | 0.0047 | 0.0163 MCFD2     | multiple coagulation factor deficiency 2           | Multiple_Complex |
| TC0500007694.hg.1    | 10.31 | 11.12 | -1.75 | 0.0047 | 0.0163 GTF2H2; G | general transcription factor IIH subunit 2; gen    | Multiple_Complex |
| TC0100007477.hg.1    | 9.35  | 10.45 | -2.14 | 0.0047 | 0.0163 ARID1A    | AT rich interactive domain 1A (SWI-like)           | Multiple_Complex |
| TC0900011708.hg.1    | 6.28  | 5.91  | 1.29  | 0.0047 | 0.0163 PTGES     | prostaglandin E synthase                           | Multiple_Complex |
| TC1900006864.hg.1    | 5.41  | 6.05  | -1.56 | 0.0047 | 0.0164 MAP2K7    | mitogen-activated protein kinase kinase 7          | Multiple_Complex |
| TC0700007552.hg.1    | 5.52  | 5.17  | 1.27  | 0.0047 | 0.0164 POM121L1  | POM121 transmembrane nucleoporin-like 12           | Coding           |
| TC0700009680.hg.1    | 5.8   | 8.69  | -7.43 | 0.0047 | 0.0164 TMEM176A  | transmembrane protein 176A                         | Multiple_Complex |
| TC0600011448.hg.1    | 5.27  | 4.89  | 1.29  | 0.0047 | 0.0164 LY6G6C    | lymphocyte antigen 6 complex, locus G6C            | Coding           |
| TC0300012897.hg.1    | 11.18 | 11.5  | -1.25 | 0.0048 | 0.0165 SSR3      | signal sequence receptor, gamma (translocon-       | Multiple_Complex |
| TC0300013881.hg.1    | 9.72  | 8.86  | 1.81  | 0.0048 | 0.0165 U2SURP    | U2 snRNP-associated SURP domain containing         | Multiple_Complex |
| TC1200007421.hg.1    | 4.96  | 6.02  | -2.08 | 0.0048 | 0.0166 ANO6      | Transcript Identified by AceView, Entrez Gene      | Unassigned       |
| TC0900011793.hg.1    | 7.3   | 7.65  | -1.27 | 0.0048 | 0.0166 MED27     | mediator complex subunit 27                        | Multiple_Complex |
| TC1700009327.hg.1    | 4.82  | 5.4   | -1.5  | 0.0048 | 0.0166 GEMIN4    | gem nuclear organelle associated protein 4         | Multiple_Complex |
| TC0900008679.hg.1    | 4.5   | 4.1   | 1.32  | 0.0048 | 0.0166 OR1K1     | olfactory receptor, family 1, subfamily K, merr    | Coding           |
| TC0900012168.hg.1    | 6.83  | 7.52  | -1.62 | 0.0048 | 0.0166 MRRF      | mitochondrial ribosome recycling factor            | Multiple_Complex |
| TC1900011398.hg.1    | 6.13  | 5.68  | 1.37  | 0.0048 | 0.0167 TMC4      | transmembrane channel like 4                       | Multiple_Complex |
| TC1100009973.hg.1    | 6.82  | 7.03  | -1.16 | 0.0048 | 0.0167 ARFIP2    | ADP-ribosylation factor interacting protein 2      | Multiple_Complex |
| TC2000009461.hg.1    | 5.41  | 4.7   | 1.64  | 0.0048 | 0.0167 ATP9A     | ATPase, class II, type 9A                          | Multiple_Complex |
| TC0400011464.hg.1    | 10.26 | 9.68  | 1.5   | 0.0048 | 0.0167 MANBA     | mannosidase, beta A, lysosomal                     | Multiple_Complex |
| TC1900009134.hg.1    | 13.27 | 12.35 | 1.89  | 0.0048 | 0.0167 SBNO2     | strawberry notch homolog 2 (Drosophila)            | Multiple_Complex |
| TC0200014802.hg.1    | 3.98  | 4.46  | -1.39 | 0.0048 | 0.0167 SCN3A     | sodium channel, voltage gated, type III alpha s    | Multiple_Complex |
| TC0600008735.hg.1    | 6.76  | 7.57  | -1.75 | 0.0048 | 0.0167 ORC3      | origin recognition complex subunit 3               | Multiple_Complex |
| TC1900006989.hg.1    | 8.74  | 8.15  | 1.5   | 0.0049 | 0.0168 ATG4D     | autophagy related 4D, cysteine peptidase           | Multiple_Complex |
| TC0Y00007326.hg.1    | 4.62  | 4.2   | 1.34  | 0.0049 | 0.0168 TSPY1     | testis specific protein, Y-linked 1                | Coding           |
| TC0500011520.hg.1    | 4.33  | 5.32  | -1.99 | 0.0049 | 0.0168 ERAP1     | Transcript Identified by AceView, Entrez Gene      | Unassigned       |
| TC1700012262.hg.1    | 9.74  | 10.38 | -1.55 | 0.0049 | 0.0168 PSME3     | proteasome activator subunit 3                     | Multiple_Complex |
| TC1200012755.hg.1    | 5.56  | 6.47  | -1.89 | 0.0049 | 0.0168 PRR4      | proline rich 4 (lacrimal)                          | Multiple_Complex |
| TC1700011749.hg.1    | 13.59 | 12.95 | 1.56  | 0.0049 | 0.0168 GRB2      | growth factor receptor bound protein 2             | Multiple_Complex |
| TC1400007688.hg.1    | 7.52  | 6.86  | 1.58  | 0.0049 | 0.0168 FCF1      | FCF1 rRNA-processing protein                       | Multiple_Complex |
| TC2100007321.hg.1    | 10.03 | 9.4   | 1.55  | 0.0049 | 0.0168 PDXK      | pyridoxal (pyridoxine, vitamin B6) kinase          | Multiple_Complex |
| TC0X00010840.hg.1    | 3.75  | 3.47  | 1.22  | 0.0049 | 0.0168 HS6ST2    | heparan sulfate 6-O-sulfotransferase 2             | Coding           |
| TSUnmapped00000045.h | 6.08  | 6.55  | -1.39 | 0.0049 | 0.0168 CCDC84    | coiled-coil domain containing 84                   | Coding           |
| TC0100013226.hg.1    | 9.54  | 10.24 | -1.63 | 0.0049 | 0.0169 USP48     | ubiquitin specific peptidase 48                    | Multiple_Complex |
| TC0600012032.hg.1    | 4.73  | 4.24  | 1.4   | 0.0049 | 0.0169 PKHD1     | polycystic kidney and hepatic disease 1 (autos     | Multiple_Complex |

|                      |       |       |       |        |                  |                                                    |                  |
|----------------------|-------|-------|-------|--------|------------------|----------------------------------------------------|------------------|
| TC1900008384.hg.1    | 12.51 | 11.83 | 1.61  | 0.0049 | 0.0169 CALM3     | calmodulin 3 (phosphorylase kinase, delta)         | Multiple_Complex |
| TC1100011914.hg.1    | 6.18  | 5.78  | 1.33  | 0.0049 | 0.0169 TRIM64B   | tripartite motif containing 64B                    | Multiple_Complex |
| TC0600009871.hg.1    | 4.69  | 4.23  | 1.37  | 0.0049 | 0.017 ESR1       | estrogen receptor 1                                | Multiple_Complex |
| TC2200007493.hg.1    | 18.66 | 18.12 | 1.46  | 0.0049 | 0.017 MEI1       | Salzman2013 ALT_ACCEPTOR, ALT_DONOR, c             | NonCoding        |
| TC1900008562.hg.1    | 5.8   | 6.3   | -1.41 | 0.0049 | 0.017 TBC1D17;   | TBC1 domain family, member 17; microRNA 4          | Multiple_Complex |
| TC1000008045.hg.1    | 7.58  | 8.04  | -1.37 | 0.005  | 0.017 SEC24C     | SEC24 homolog C, COPII coat complex compo          | Multiple_Complex |
| TC0600007959.hg.1    | 4.32  | 3.6   | 1.65  | 0.005  | 0.0171 DAAM2     | dishevelled associated activator of morphogen      | Multiple_Complex |
| TSUnmapped00000161.h | 6.09  | 5.61  | 1.4   | 0.005  | 0.0171 SURF1     | surfeit 1                                          | Coding           |
| TC1400010758.hg.1    | 5.07  | 4.17  | 1.86  | 0.005  | 0.0171 CCDC175   | coiled-coil domain containing 175                  | Multiple_Complex |
| TC0300013886.hg.1    | 3.7   | 3.43  | 1.21  | 0.005  | 0.0171 ZIC1      | Zic family member 1                                | Coding           |
| TC0100014921.hg.1    | 4.12  | 4.75  | -1.55 | 0.005  | 0.0171 GLMN      | glomulin, FKBP associated protein                  | Multiple_Complex |
| TC1900007051.hg.1    | 7.17  | 7.71  | -1.46 | 0.005  | 0.0171 ZNF439    | zinc finger protein 439                            | Multiple_Complex |
| TC0100017548.hg.1    | 4.04  | 3.69  | 1.27  | 0.005  | 0.0171 CDC42BPA  | CDC42 binding protein kinase alpha (DMPK-lik       | Multiple_Complex |
| TC0X00007203.hg.1    | 6.72  | 6.32  | 1.32  | 0.005  | 0.0171 GLOD5     | glyoxalase domain containing 5                     | Multiple_Complex |
| TC2000007695.hg.1    | 12.04 | 11.43 | 1.54  | 0.005  | 0.0171 PTPN1     | protein tyrosine phosphatase, non-receptor ty      | Multiple_Complex |
| TC2000008940.hg.1    | 5.99  | 5.39  | 1.51  | 0.005  | 0.0172 PIGU      | Salzman2013 ALT_ACCEPTOR, ALT_DONOR, c             | NonCoding        |
| TC1100013191.hg.1    | 7.78  | 8.54  | -1.69 | 0.005  | 0.0172 POLD4     | polymerase (DNA-directed), delta 4, accessory      | Multiple_Complex |
| TC1200012741.hg.1    | 4.57  | 4.15  | 1.33  | 0.005  | 0.0172 ANO2      | anoctamin 2, calcium activated chloride chanr      | Multiple_Complex |
| TC1900010746.hg.1    | 5.63  | 6.5   | -1.83 | 0.005  | 0.0172 EXOSC5    | exosome component 5                                | Multiple_Complex |
| TC2000009673.hg.1    | 6.63  | 5.68  | 1.93  | 0.005  | 0.0172 SYCP2     | synaptonemal complex protein 2                     | Multiple_Complex |
| TC0100010664.hg.1    | 6.2   | 6.65  | -1.37 | 0.005  | 0.0172 ZBTB37    | zinc finger and BTB domain containing 37           | Multiple_Complex |
| TC0100007800.hg.1    | 6.52  | 7.27  | -1.68 | 0.005  | 0.0173 THRAP3    | Jeck2013 ALT_ACCEPTOR, ALT_DONOR, codin            | NonCoding        |
| TC0700008873.hg.1    | 5.95  | 5.14  | 1.75  | 0.005  | 0.0173 CAV1      | caveolin 1                                         | Multiple_Complex |
| TC1100013206.hg.1    | 8.63  | 7.63  | 2.01  | 0.005  | 0.0173 STARD10   | StAR-related lipid transfer domain containing      | Multiple_Complex |
| TC0X00007230.hg.1    | 4.24  | 3.78  | 1.37  | 0.005  | 0.0173 GAGE2D;   | G G antigen 2D; G antigen 13; G antigen 2E; G ar   | Coding           |
| TC1100009792.hg.1    | 5.32  | 5.79  | -1.39 | 0.005  | 0.0173 C11orf21  | chromosome 11 open reading frame 21                | Multiple_Complex |
| TC0200011130.hg.1    | 9.41  | 8.91  | 1.42  | 0.005  | 0.0173 DGKD      | diacylglycerol kinase, delta 130kDa                | Multiple_Complex |
| TC0700006523.hg.1    | 6.36  | 6.74  | -1.31 | 0.005  | 0.0173 PSMG3-AS; | PSMG3 antisense RNA 1 (head to head)               | NonCoding        |
| TC1700011097.hg.1    | 8.39  | 7.87  | 1.44  | 0.0051 | 0.0173 LRRC59    | leucine rich repeat containing 59                  | Multiple_Complex |
| TC0100015196.hg.1    | 9.19  | 9.91  | -1.64 | 0.0051 | 0.0173 PSMA5     | proteasome subunit alpha 5                         | Multiple_Complex |
| TC0X00009684.hg.1    | 4.22  | 3.72  | 1.41  | 0.0051 | 0.0173 SHROOM4   | shroom family member 4                             | Multiple_Complex |
| TC0600009333.hg.1    | 7.18  | 6.43  | 1.68  | 0.0051 | 0.0173 SMPDL3A   | sphingomyelin phosphodiesterase, acid-like 3,      | Multiple_Complex |
| TC1000008574.hg.1    | 10.45 | 11.22 | -1.7  | 0.0051 | 0.0174 PGAM1     | phosphoglycerate mutase 1 (brain)                  | Multiple_Complex |
| TC1100013000.hg.1    | 5.07  | 4.58  | 1.41  | 0.0051 | 0.0174 CLP1;     | AP00 Transcript Identified by AceView, Entrez Gene | NonCoding        |
| TC0300008563.hg.1    | 10.5  | 9.67  | 1.79  | 0.0051 | 0.0174 DIRC2     | disrupted in renal carcinoma 2                     | Multiple_Complex |
| TC1700010230.hg.1    | 7.73  | 8.22  | -1.4  | 0.0051 | 0.0174 TIAF1;    | MYC TGFB1-induced anti-apoptotic factor 1; myosi   | Multiple_Complex |
| TC0600008931.hg.1    | 5.59  | 4.92  | 1.6   | 0.0051 | 0.0175 GRIK2     | glutamate receptor, ionotropic, kainate 2          | Multiple_Complex |
| TC0200008894.hg.1    | 6.34  | 5.52  | 1.76  | 0.0051 | 0.0175 MERTK     | MER proto-oncogene, tyrosine kinase                | Multiple_Complex |
| TC1900009742.hg.1    | 5.03  | 4.66  | 1.29  | 0.0051 | 0.0175 FBXW9     | F-box and WD repeat domain containing 9            | Multiple_Complex |
| TC0100010134.hg.1    | 9.13  | 8.68  | 1.37  | 0.0051 | 0.0175 DAP3      | death associated protein 3                         | Multiple_Complex |
| TC1200009467.hg.1    | 6.41  | 6.84  | -1.34 | 0.0051 | 0.0176 NOC4L     | nucleolar complex associated 4 homolog             | Multiple_Complex |
| TC1500006748.hg.1    | 5.49  | 6.2   | -1.64 | 0.0051 | 0.0176 FAN1      | FANCD2/FANCI-associated nuclease 1                 | Multiple_Complex |
| TC1500010887.hg.1    | 5.62  | 6.21  | -1.5  | 0.0051 | 0.0176 CLN6      | ceroid-lipofuscinosis, neuronal 6, late infantile  | Multiple_Complex |
| TC1600011315.hg.1    | 8.25  | 8.78  | -1.45 | 0.0052 | 0.0176 FAM234A;  | family with sequence similarity 234, member        | Multiple_Complex |
| TC0100016157.hg.1    | 6.29  | 5.87  | 1.34  | 0.0052 | 0.0177 PVRL4     | poliovirus receptor-related 4                      | Multiple_Complex |
| TSUnmapped00000182.h | 3.77  | 4.72  | -1.92 | 0.0052 | 0.0177 ZKSCAN7   | zinc finger with KRAB and SCAN domains 7           | Coding           |
| TC1900011774.hg.1    | 15.96 | 16.26 | -1.24 | 0.0052 | 0.0177 EMP3      | epithelial membrane protein 3                      | Multiple_Complex |
| TC1300007045.hg.1    | 5.94  | 6.69  | -1.69 | 0.0052 | 0.0177 GPALPP1   | GPALPP motifs containing 1                         | Multiple_Complex |
| TC0400010785.hg.1    | 6.94  | 8.43  | -2.81 | 0.0052 | 0.0177 IGFBP7    | insulin like growth factor binding protein 7       | Multiple_Complex |
| TC1700012053.hg.1    | 5.15  | 5.78  | -1.55 | 0.0052 | 0.0177 FAAP100   | Fanconi anemia core complex associated prot        | Multiple_Complex |
| TC0500013253.hg.1    | 10.84 | 11.34 | -1.42 | 0.0052 | 0.0177 RBM27     | RNA binding motif protein 27                       | Multiple_Complex |
| TC0300010982.hg.1    | 7.35  | 7.92  | -1.49 | 0.0052 | 0.0177 SCAP      | SREBF chaperone                                    | Multiple_Complex |
| TC1900009896.hg.1    | 5.24  | 4.83  | 1.33  | 0.0052 | 0.0177 CYP4F11   | cytochrome P450, family 4, subfamily F, polyp      | Multiple_Complex |
| TC0500009072.hg.1    | 5.28  | 5.82  | -1.46 | 0.0052 | 0.0177 PPARGC1B  | peroxisome proliferator-activated receptor ga      | Multiple_Complex |
| TC0700013604.hg.1    | 9.43  | 9.88  | -1.37 | 0.0052 | 0.0177 UPK3BL;   | PC uroplakin 3B-like; polymerase (RNA) II (DNA d   | Multiple_Complex |
| TC1200010641.hg.1    | 4.07  | 4.58  | -1.43 | 0.0052 | 0.0177 BCDIN3D   | BCDIN3 domain containing                           | Multiple_Complex |
| TC1200007277.hg.1    | 7.39  | 6.85  | 1.45  | 0.0052 | 0.0177 DNM1L     | dynamain 1-like                                    | Multiple_Complex |
| TC1900007952.hg.1    | 5.57  | 5.89  | -1.25 | 0.0052 | 0.0177 LOC728485 | uncharacterized LOC728485; novel transcript        | Multiple_Complex |
| TC0700011898.hg.1    | 5.7   | 6.1   | -1.32 | 0.0052 | 0.0178 TECPR1    | tectonin beta-propeller repeat containing 1        | Multiple_Complex |
| TC0X00007539.hg.1    | 4.03  | 3.53  | 1.42  | 0.0052 | 0.0178 GDDP2     | glycerophosphodiester phosphodiesterase do         | Multiple_Complex |
| TC0500011208.hg.1    | 7.86  | 7.16  | 1.63  | 0.0052 | 0.0178 WDR41     | WD repeat domain 41                                | Multiple_Complex |
| TC2000007537.hg.1    | 4.05  | 3.51  | 1.45  | 0.0052 | 0.0178 SLC2A10   | solute carrier family 2 (facilitated glucose tran  | Multiple_Complex |
| TC0200007059.hg.1    | 5.65  | 6.24  | -1.51 | 0.0052 | 0.0179 CAD       | carbamoyl-phosphate synthetase 2, aspartate        | Multiple_Complex |
| TC0100010255.hg.1    | 4.38  | 3.79  | 1.5   | 0.0052 | 0.0179 OR10J4    | olfactory receptor, family 10, subfamily J, mer    | Pseudogene       |
| TC0X00008759.hg.1    | 5.71  | 6.21  | -1.42 | 0.0052 | 0.0179 NSDHL     | NAD(P) dependent steroid dehydrogenase-lik         | Multiple_Complex |
| TC1900008839.hg.1    | 5.78  | 5.19  | 1.5   | 0.0052 | 0.0179 TSEN34    | TSEN34 tRNA splicing endonuclease subunit          | Multiple_Complex |
| TC1200008224.hg.1    | 13.48 | 14.14 | -1.59 | 0.0053 | 0.0179 GLIPR1    | GLI pathogenesis-related 1                         | Multiple_Complex |
| TC1900011639.hg.1    | 8.73  | 9.27  | -1.46 | 0.0053 | 0.0179 STK11     | serine/threonine kinase 11                         | Multiple_Complex |
| TC1900011916.hg.1    | 9.66  | 10.18 | -1.44 | 0.0053 | 0.0179 ZNF626    | zinc finger protein 626                            | Multiple_Complex |
| TC2000006622.hg.1    | 6.6   | 7     | -1.31 | 0.0053 | 0.0179 C20orf196 | chromosome 20 open reading frame 196               | Multiple_Complex |

|                     |       |       |       |        |                   |                                                  |                  |
|---------------------|-------|-------|-------|--------|-------------------|--------------------------------------------------|------------------|
| TC2000007150.hg.1   | 3.54  | 3.25  | 1.23  | 0.0053 | 0.0179 BPIFB1     | BPI fold containing family B, member 1           | Multiple_Complex |
| TC0200009596.hg.1   | 7.87  | 7.16  | 1.63  | 0.0053 | 0.0179 ACVR2A     | activin A receptor type IIA                      | Multiple_Complex |
| TC0200016193.hg.1   | 4.13  | 3.67  | 1.38  | 0.0053 | 0.018 COL6A3      | collagen, type VI, alpha 3                       | Multiple_Complex |
| TC0100008845.hg.1   | 4.13  | 3.69  | 1.36  | 0.0053 | 0.018 ADGRL2      | adhesion G protein-coupled receptor L2           | Multiple_Complex |
| TC0700008898.hg.1   | 4.33  | 3.92  | 1.33  | 0.0053 | 0.018 ANKRD7      | ankyrin repeat domain 7                          | Multiple_Complex |
| TC0800009242.hg.1   | 6.33  | 6.69  | -1.28 | 0.0053 | 0.018 HGH1        | HGH1 homolog                                     | Multiple_Complex |
| TC0700009693.hg.1   | 7.53  | 7.92  | -1.31 | 0.0053 | 0.018 AGAP3       | ArfGAP with GTPase domain, ankyrin repeat a      | Multiple_Complex |
| TC2200007574.hg.1   | 6.38  | 5.55  | 1.79  | 0.0053 | 0.018 PARVB       | parvin, beta                                     | Multiple_Complex |
| TC1900011806.hg.1   | 5.27  | 5.96  | -1.61 | 0.0053 | 0.0181 ZNF582-AS  | ZNF582 antisense RNA 1 (head to head)            | NonCoding        |
| TC0500009223.hg.1   | 5     | 5.67  | -1.59 | 0.0053 | 0.0181 THG1L      | tRNA-histidine guanylyltransferase 1-like        | Multiple_Complex |
| TC1600010517.hg.1   | 5.36  | 4.86  | 1.42  | 0.0053 | 0.0181 LOC72915E  | UPF0607 protein ENSP00000381418-like; Put:       | Coding           |
| TC0200009902.hg.1   | 4.38  | 3.83  | 1.47  | 0.0053 | 0.0181 NOSTRIN    | nitric oxide synthase trafficking                | Multiple_Complex |
| TC0200009680.hg.1   | 4.66  | 5.47  | -1.76 | 0.0053 | 0.0181 FMNL2      | formin like 2                                    | Multiple_Complex |
| TC0400011108.hg.1   | 11.1  | 11.74 | -1.56 | 0.0053 | 0.0181 CNOT6L     | CCR4-NOT transcription complex subunit 6-like    | Multiple_Complex |
| TC0300009167.hg.1   | 7.53  | 7.03  | 1.42  | 0.0053 | 0.0181 EIF2A      | eukaryotic translation initiation factor 2A, 65k | Multiple_Complex |
| TC0600014095.hg.1   | 5.17  | 5.54  | -1.29 | 0.0053 | 0.0181 RPP21      | ribonuclease P/MRP 21kDa subunit                 | Multiple_Complex |
| TC1400008486.hg.1   | 4.59  | 4.89  | -1.23 | 0.0053 | 0.0181 CRIP2      | cysteine-rich protein 2                          | Multiple_Complex |
| TC1000006639.hg.1   | 8.66  | 9.25  | -1.5  | 0.0053 | 0.0181 FBXO18     | F-box protein, helicase, 18                      | Multiple_Complex |
| TC0200016604.hg.1   | 4.73  | 4.06  | 1.6   | 0.0053 | 0.0181 RBM44      | RNA binding motif protein 44                     | Multiple_Complex |
| TC1600007753.hg.1   | 9.91  | 10.11 | -1.15 | 0.0053 | 0.0182 LONP2      | lon peptidase 2, peroxisomal                     | Multiple_Complex |
| TC1900009198.hg.1   | 7.55  | 8.08  | -1.45 | 0.0054 | 0.0182 BTBD2      | BTB (POZ) domain containing 2                    | Multiple_Complex |
| TC2200008528.hg.1   | 6.04  | 5.42  | 1.54  | 0.0054 | 0.0182 LARGE      | like-glycosyltransferase                         | Multiple_Complex |
| TC0200007257.hg.1   | 7.18  | 7.72  | -1.46 | 0.0054 | 0.0182 NDUFAF7    | NADH dehydrogenase (ubiquinone) complex I        | Multiple_Complex |
| TC0100018361.hg.1   | 7.82  | 7.34  | 1.39  | 0.0054 | 0.0182 TSNAX-DIS1 | TSNAX-DISC1 readthrough (NMD candidate)          | Multiple_Complex |
| TC1100007307.hg.1   | 5.68  | 5.24  | 1.35  | 0.0054 | 0.0182 C11orf74   | chromosome 11 open reading frame 74              | Multiple_Complex |
| TC0200014912.hg.1   | 6.36  | 6.01  | 1.27  | 0.0054 | 0.0183 DLX2       | distal-less homeobox 2                           | Coding           |
| TC1900009062.hg.1   | 7.69  | 8.36  | -1.6  | 0.0054 | 0.0183 TRIM28     | tripartite motif containing 28                   | Multiple_Complex |
| TC0800007132.hg.1   | 4.54  | 5.02  | -1.4  | 0.0054 | 0.0183 PNOG       | prepronociceptin                                 | Multiple_Complex |
| TC1500006930.hg.1   | 5.83  | 6.4   | -1.49 | 0.0054 | 0.0183 EIF2AK4    | eukaryotic translation initiation factor 2 alpha | Multiple_Complex |
| TC0300006566.hg.1   | 5.12  | 5.62  | -1.42 | 0.0054 | 0.0183 CRELD1     | cysteine rich with EGF-like domains 1            | Multiple_Complex |
| TC1700012309.hg.1   | 8.55  | 9.12  | -1.49 | 0.0054 | 0.0183 METTL23    | methyltransferase like 23                        | Multiple_Complex |
| TC0600009080.hg.1   | 5.89  | 5.16  | 1.66  | 0.0054 | 0.0183 CEP57L1    | centrosomal protein 57kDa-like 1                 | Multiple_Complex |
| TC0200016318.hg.1   | 5.65  | 5.23  | 1.34  | 0.0054 | 0.0184 PP14571; A | uncharacterized LOC100130449; novel transcr      | Multiple_Complex |
| TC1200011657.hg.1   | 7.33  | 6.72  | 1.53  | 0.0054 | 0.0184 ANKS1B     | ankyrin repeat and sterile alpha motif domain    | Multiple_Complex |
| TC0Y00006528.hg.1   | 6.95  | 8.25  | -2.47 | 0.0055 | 0.0185 PRKY       | protein kinase, Y-linked, pseudogene             | Multiple_Complex |
| TC1900008987.hg.1   | 3.91  | 3.42  | 1.4   | 0.0055 | 0.0185 AURKC      | aurora kinase C                                  | Coding           |
| TC0100015580.hg.1   | 10.35 | 9.91  | 1.36  | 0.0055 | 0.0185 NBP20      | neuroblastoma breakpoint family, member 20       | Coding           |
| TC0700007811.hg.1   | 8.1   | 8.5   | -1.32 | 0.0055 | 0.0185 INTS4P2    | integrator complex subunit 4 pseudogene 2        | Multiple_Complex |
| TC0100015781.hg.1   | 6.77  | 7.23  | -1.37 | 0.0055 | 0.0186 PI4KB      | phosphatidylinositol 4-kinase, catalytic, beta   | Multiple_Complex |
| TSUnmapped0000052.h | 4.78  | 4.28  | 1.42  | 0.0055 | 0.0186 HHAT       | hedgehog acyltransferase                         | Coding           |
| TC0800007382.hg.1   | 4.99  | 5.75  | -1.7  | 0.0055 | 0.0186 IDO1       | indoleamine 2,3-dioxygenase 1                    | Multiple_Complex |
| TC0900011778.hg.1   | 8     | 8.5   | -1.41 | 0.0055 | 0.0186 RAPGEF1    | Rap guanine nucleotide exchange factor 1         | Multiple_Complex |
| TC0500013235.hg.1   | 11.47 | 10.78 | 1.61  | 0.0055 | 0.0186 FAM53C     | family with sequence similarity 53, member C     | Multiple_Complex |
| TC1300007070.hg.1   | 7.74  | 8.42  | -1.6  | 0.0055 | 0.0186 COG3       | component of oligomeric golgi complex 3          | Multiple_Complex |
| TC1200008535.hg.1   | 6.75  | 7.57  | -1.77 | 0.0055 | 0.0186 ELK3       | ELK3, ETS-domain protein (SRF accessory prot     | Multiple_Complex |
| TC0200011070.hg.1   | 6.53  | 6.84  | -1.24 | 0.0055 | 0.0186 C2orf57    | chromosome 2 open reading frame 57               | Coding           |
| TC0100008996.hg.1   | 6.89  | 6.23  | 1.58  | 0.0055 | 0.0187 ZNF326     | zinc finger protein 326                          | Multiple_Complex |
| TC1400007300.hg.1   | 7.47  | 6.63  | 1.79  | 0.0055 | 0.0187 PSMA3      | proteasome subunit alpha 3                       | Multiple_Complex |
| TC1700007674.hg.1   | 6.43  | 7.02  | -1.5  | 0.0055 | 0.0187 TADA2A     | transcriptional adaptor 2A                       | Multiple_Complex |
| TC0X00009636.hg.1   | 7     | 6.13  | 1.82  | 0.0055 | 0.0187 SLC35A2    | solute carrier family 35 (UDP-galactose transp   | Multiple_Complex |
| TC1900011914.hg.1   | 6.59  | 7.21  | -1.54 | 0.0055 | 0.0187 ZNF506     | zinc finger protein 506                          | Multiple_Complex |
| TC0900010147.hg.1   | 6.75  | 5.67  | 2.11  | 0.0055 | 0.0187 CNTNAP3B   | contactin associated protein-like 3B             | Multiple_Complex |
| TC0700009065.hg.1   | 5.51  | 6.13  | -1.54 | 0.0055 | 0.0187 CCDC136    | coiled-coil domain containing 136                | Multiple_Complex |
| TC1500008139.hg.1   | 6.22  | 5.8   | 1.33  | 0.0055 | 0.0187 GOLGA6L4   | Homo sapiens golgin A6 family-like 4 (GOLGA6     | Multiple_Complex |
| TC0500012864.hg.1   | 5.02  | 4.77  | 1.19  | 0.0056 | 0.0188 NKX2-5     | NK2 homeobox 5                                   | Coding           |
| TC0800010084.hg.1   | 6.04  | 5.76  | 1.22  | 0.0056 | 0.0188 DUSP26     | dual specificity phosphatase 26 (putative)       | Coding           |
| TC1500010465.hg.1   | 5.97  | 6.58  | -1.53 | 0.0056 | 0.0188 VPS33B     | vacuolar protein sorting 33 homolog B (yeast)    | Multiple_Complex |
| TC0200014738.hg.1   | 8.18  | 8.76  | -1.49 | 0.0056 | 0.0188 RBMS1      | Memczak2013 ALT_ACCEPTOR, ALT_DONOR,             | NonCoding        |
| TC2100008517.hg.1   | 7.92  | 7.52  | 1.32  | 0.0056 | 0.0188 WRB        | tryptophan rich basic protein                    | Multiple_Complex |
| TC0500013334.hg.1   | 7.75  | 7.31  | 1.36  | 0.0056 | 0.0188 DMGDH      | dimethylglycine dehydrogenase                    | NonCoding        |
| TC0200008627.hg.1   | 5.26  | 5.87  | -1.52 | 0.0056 | 0.0189 NPAS2      | neuronal PAS domain protein 2                    | Multiple_Complex |
| TC0300007409.hg.1   | 5.12  | 4.62  | 1.41  | 0.0056 | 0.0189 SLC38A3    | solute carrier family 38, member 3               | Multiple_Complex |
| TC0100015160.hg.1   | 8.8   | 8.36  | 1.36  | 0.0056 | 0.0189 SLC25A24   | solute carrier family 25 (mitochondrial carrier) | Multiple_Complex |
| TC1400009967.hg.1   | 6.88  | 5.84  | 2.05  | 0.0056 | 0.0189 TTC7B      | tetratricopeptide repeat domain 7B               | Multiple_Complex |
| TC0700012960.hg.1   | 5.57  | 4.58  | 1.98  | 0.0056 | 0.0189 EZH2       | Transcript Identified by AceView, Entrez Gene    | Unassigned       |
| TC1200012853.hg.1   | 4.83  | 4.38  | 1.37  | 0.0056 | 0.0189 NOS1       | nitric oxide synthase 1 (neuronal)               | Multiple_Complex |
| TC0100010764.hg.1   | 5.43  | 5.84  | -1.33 | 0.0056 | 0.0189 TOR3A      | torsin family 3, member A                        | Multiple_Complex |
| TC1500010854.hg.1   | 5.19  | 4.58  | 1.52  | 0.0056 | 0.0189 GPR176     | G protein-coupled receptor 176                   | Multiple_Complex |
| TC0300008542.hg.1   | 6.97  | 7.85  | -1.84 | 0.0056 | 0.0189 CD86       | CD86 molecule                                    | Multiple_Complex |
| TC0600007231.hg.1   | 6.14  | 6.65  | -1.42 | 0.0056 | 0.019 LRRC16A     | leucine rich repeat containing 16A               | Multiple_Complex |

|                      |       |       |       |        |                  |                                                |                  |
|----------------------|-------|-------|-------|--------|------------------|------------------------------------------------|------------------|
| TC1900007802.hg.1    | 5.96  | 6.44  | -1.4  | 0.0056 | 0.019 KIAA0355   | KIAA0355                                       | Multiple_Complex |
| TC1100007026.hg.1    | 6.64  | 7.24  | -1.52 | 0.0056 | 0.019 ZDHC13     | zinc finger, DHHC-type containing 13           | Multiple_Complex |
| TSUnmapped00000224.h | 7.17  | 6.76  | 1.33  | 0.0056 | 0.019 ZDHC3      | zinc finger, DHHC-type containing 3            | NonCoding        |
| TC1100007778.hg.1    | 4.48  | 3.95  | 1.44  | 0.0056 | 0.019 MS4A18     | membrane-spanning 4-domains, subfamily A,      | Multiple_Complex |
| TC1900010708.hg.1    | 8.09  | 9.04  | -1.93 | 0.0057 | 0.019 BLVRB      | biliverdin reductase B                         | Multiple_Complex |
| TC2100007462.hg.1    | 6.1   | 6.53  | -1.35 | 0.0057 | 0.019 YBEY       | ybeY metalloproteinase (putative)              | Multiple_Complex |
| TC1100011744.hg.1    | 7.86  | 6.82  | 2.06  | 0.0057 | 0.019 GAB2       | GRB2-associated binding protein 2              | Multiple_Complex |
| TC2200009186.hg.1    | 7.22  | 7.59  | -1.29 | 0.0057 | 0.019 PEX26      | peroxisomal biogenesis factor 26               | Multiple_Complex |
| TC2000007110.hg.1    | 5.12  | 5.47  | -1.27 | 0.0057 | 0.019 POFUT1; M  | protein O-fucosyltransferase 1; microRNA 182   | Multiple_Complex |
| TC0900011631.hg.1    | 8.46  | 8.06  | 1.32  | 0.0057 | 0.0191 GOLGA2    | golgin A2                                      | Multiple_Complex |
| TC1900011571.hg.1    | 5.92  | 6.76  | -1.78 | 0.0057 | 0.0191 ZNF550    | zinc finger protein 550                        | Multiple_Complex |
| TC0100011648.hg.1    | 8.02  | 8.92  | -1.88 | 0.0057 | 0.0191 IARS2     | isoleucyl-tRNA synthetase 2, mitochondrial     | Multiple_Complex |
| TC0500008541.hg.1    | 4.66  | 4.36  | 1.23  | 0.0057 | 0.0191 TEX43     | testis expressed 43                            | Multiple_Complex |
| TC1900008036.hg.1    | 5.05  | 5.4   | -1.27 | 0.0057 | 0.0191 MRPS12    | mitochondrial ribosomal protein S12            | Multiple_Complex |
| TC1300009008.hg.1    | 6.54  | 7     | -1.38 | 0.0057 | 0.0191 NEK3      | NIMA-related kinase 3                          | Multiple_Complex |
| TC1400007769.hg.1    | 5.25  | 5.8   | -1.47 | 0.0057 | 0.0192 ADCK1     | aarF domain containing kinase 1                | Multiple_Complex |
| TC1900008445.hg.1    | 5.77  | 5.39  | 1.3   | 0.0057 | 0.0192 ZNF114    | zinc finger protein 114                        | Multiple_Complex |
| TC0200016414.hg.1    | 5.96  | 6.42  | -1.38 | 0.0057 | 0.0192 FAM228B   | family with sequence similarity 228, member    | Multiple_Complex |
| TC0400012068.hg.1    | 5.65  | 6.32  | -1.6  | 0.0057 | 0.0193 PRMT9     | protein arginine methyltransferase 9           | Multiple_Complex |
| TC0100013619.hg.1    | 6.34  | 5.65  | 1.62  | 0.0058 | 0.0193 ZBTB80S   | zinc finger and BTB domain containing 8 oppo   | Multiple_Complex |
| TC2100008559.hg.1    | 6.78  | 7.53  | -1.68 | 0.0058 | 0.0194 C21orf59  | chromosome 21 open reading frame 59            | Multiple_Complex |
| TC1700009541.hg.1    | 9.67  | 10.43 | -1.68 | 0.0058 | 0.0194 CAMTA2    | calmodulin binding transcription activator 2   | Multiple_Complex |
| TC1600010633.hg.1    | 13.72 | 12.9  | 1.77  | 0.0058 | 0.0195 ATP6V0D1  | ATPase, H+ transporting, lysosomal 38kDa, V0   | Multiple_Complex |
| TC0700007996.hg.1    | 6.68  | 6.3   | 1.31  | 0.0058 | 0.0195 ELN       | elastin                                        | Multiple_Complex |
| TC1900011635.hg.1    | 10.59 | 9.87  | 1.65  | 0.0058 | 0.0195 CHMP2A    | charged multivesicular body protein 2A         | Multiple_Complex |
| TC0300013926.hg.1    | 6.04  | 6.69  | -1.57 | 0.0058 | 0.0195 SUMF1     | sulfatase modifying factor 1                   | Multiple_Complex |
| TC0600007289.hg.1    | 5.63  | 4.6   | 2.04  | 0.0058 | 0.0196 HIST1H4F  | histone cluster 1, H4f                         | Coding           |
| TC0X00010875.hg.1    | 5.67  | 5.16  | 1.43  | 0.0058 | 0.0196 PLAC1     | placenta specific 1                            | Multiple_Complex |
| TC1100008067.hg.1    | 13.53 | 14.43 | -1.87 | 0.0058 | 0.0196 RAB1B     | RAB1B, member RAS oncogene family              | Multiple_Complex |
| TC0700008868.hg.1    | 11.51 | 12    | -1.41 | 0.0058 | 0.0196 TES       | testin LIM domain protein                      | Multiple_Complex |
| TC0100018555.hg.1    | 5.02  | 4.58  | 1.35  | 0.0058 | 0.0196 LEMD1     | LEM domain containing 1                        | Multiple_Complex |
| TC0600012562.hg.1    | 4.66  | 5.37  | -1.63 | 0.0059 | 0.0196 BACH2     | Memczak2013 ALT_ACCEPTOR, ALT_DONOR,           | NonCoding        |
| TC0X00006709.hg.1    | 4.15  | 4.84  | -1.61 | 0.0059 | 0.0196 NHS       | Nance-Horan syndrome (congenital cataracts     | Multiple_Complex |
| TC1200009252.hg.1    | 6.32  | 6.92  | -1.51 | 0.0059 | 0.0196 TCTN2     | tectonic family member 2                       | Multiple_Complex |
| TC0700012824.hg.1    | 5.73  | 5.06  | 1.58  | 0.0059 | 0.0196 MRPS33    | mitochondrial ribosomal protein S33            | Multiple_Complex |
| TC0100009199.hg.1    | 12.06 | 11.63 | 1.35  | 0.0059 | 0.0196 MFS14A    | major facilitator superfamily domain containi  | Multiple_Complex |
| TC1900011836.hg.1    | 5.9   | 6.45  | -1.47 | 0.0059 | 0.0196 MBD3      | methyl-CpG binding domain protein 3            | Multiple_Complex |
| TC1100009168.hg.1    | 9.15  | 9.79  | -1.56 | 0.0059 | 0.0197 SIDT2     | SID1 transmembrane family, member 2            | Multiple_Complex |
| TC0100014188.hg.1    | 10.72 | 10.24 | 1.4   | 0.0059 | 0.0197 NRDC; MIR | nardilysin convertase; microRNA 761            | Multiple_Complex |
| TC1600011312.hg.1    | 3.74  | 5.33  | -3.02 | 0.0059 | 0.0198 HBZ       | hemoglobin, zeta                               | Multiple_Complex |
| TC0200016220.hg.1    | 7.21  | 6.6   | 1.52  | 0.0059 | 0.0198 ILKAP     | ILK associated serine/threonine phosphatase    | Multiple_Complex |
| TC0600008346.hg.1    | 7.34  | 8.14  | -1.75 | 0.0059 | 0.0198 KIAA1586  | KIAA1586                                       | Multiple_Complex |
| TC1500010106.hg.1    | 6.71  | 7.27  | -1.47 | 0.0059 | 0.0198 TSPAN3    | tetraspanin 3                                  | Multiple_Complex |
| TC0X00008138.hg.1    | 3.93  | 4.72  | -1.72 | 0.0059 | 0.0198 ALG13     | Transcript Identified by AceView, Entrez Gene  | Unassigned       |
| TC0500007972.hg.1    | 14.89 | 13.05 | 3.56  | 0.0059 | 0.0199 VCAN      | versican                                       | Multiple_Complex |
| TC1500010872.hg.1    | 5.1   | 5.5   | -1.32 | 0.0059 | 0.0199 ZNF280D   | zinc finger protein 280D                       | NonCoding        |
| TC0100009846.hg.1    | 4.61  | 5.27  | -1.59 | 0.006  | 0.0199 PDE4DIP   | Transcript Identified by AceView, Entrez Gene  | Unassigned       |
| TC1200008275.hg.1    | 4.37  | 4.01  | 1.29  | 0.006  | 0.0199 SYT1      | synaptotagmin I                                | Multiple_Complex |
| TC0X00007390.hg.1    | 4.58  | 5.13  | -1.46 | 0.006  | 0.02 KLF8        | Kruppel-like factor 8                          | Multiple_Complex |
| TC1900008358.hg.1    | 6.16  | 6.67  | -1.42 | 0.006  | 0.02 CCDC61      | coiled-coil domain containing 61               | Multiple_Complex |
| TC1000012403.hg.1    | 4.6   | 4.19  | 1.33  | 0.006  | 0.02 SPRN        | shadow of prion protein homolog (zebrafish)    | Coding           |
| TC1000011683.hg.1    | 9.53  | 10.05 | -1.43 | 0.006  | 0.02 ACTR1A      | ARP1 actin-related protein 1 homolog A, centr  | Multiple_Complex |
| TC0200016747.hg.1    | 4.86  | 5.61  | -1.68 | 0.006  | 0.02 TTC21B      | tetratricopeptide repeat domain 21B            | Multiple_Complex |
| TC0200010972.hg.1    | 9.99  | 9.32  | 1.59  | 0.006  | 0.02 MFF         | mitochondrial fission factor                   | Multiple_Complex |
| TC2200009260.hg.1    | 7.56  | 7.14  | 1.34  | 0.006  | 0.0201 DRG1      | developmentally regulated GTP binding protei   | Multiple_Complex |
| TC0400008557.hg.1    | 6.24  | 6.88  | -1.56 | 0.006  | 0.0201 USP53     | ubiquitin specific peptidase 53                | Multiple_Complex |
| TC1100007704.hg.1    | 4.11  | 3.67  | 1.36  | 0.006  | 0.0201 OR9Q2     | olfactory receptor, family 9, subfamily Q, men | Coding           |
| TC0200008168.hg.1    | 4.19  | 3.7   | 1.41  | 0.006  | 0.0201 REG1A     | regenerating islet-derived 1 alpha             | Multiple_Complex |
| TC0900011192.hg.1    | 7.09  | 7.74  | -1.57 | 0.006  | 0.0201 LPAR1     | lysophosphatidic acid receptor 1               | Multiple_Complex |
| TC0200013616.hg.1    | 7.23  | 8.23  | -2    | 0.0061 | 0.0203 AFF3      | AF4/FMR2 family, member 3                      | Multiple_Complex |
| TC0900009114.hg.1    | 9.39  | 9.86  | -1.39 | 0.0061 | 0.0203 RXRA; MIR | retinoid X receptor alpha; microRNA 4669       | Multiple_Complex |
| TC1700006602.hg.1    | 6.48  | 5.98  | 1.42  | 0.0061 | 0.0203 ATP2A3    | Memczak2013 ANTISENSE, CDS, coding, INTEF      | NonCoding        |
| TC0500012938.hg.1    | 8.91  | 8.35  | 1.47  | 0.0061 | 0.0203 CLTB      | clathrin, light chain B                        | Multiple_Complex |
| TC0100013608.hg.1    | 5.43  | 5.8   | -1.29 | 0.0061 | 0.0203 MARCKSL1  | MARCKS-like 1                                  | Multiple_Complex |
| TSUnmapped00000018.h | 4.77  | 5.16  | -1.31 | 0.0061 | 0.0203 ZNF35     | zinc finger protein 35                         | Coding           |
| TC0600009041.hg.1    | 3.91  | 3.47  | 1.35  | 0.0061 | 0.0204 NR2E1     | nuclear receptor subfamily 2, group E, membe   | Multiple_Complex |
| TC1500006977.hg.1    | 7.23  | 6.62  | 1.52  | 0.0061 | 0.0204 VPS18     | VPS18 CORVET/HOPS core subunit                 | Multiple_Complex |
| TC0700011968.hg.1    | 6.64  | 7.21  | -1.48 | 0.0061 | 0.0204 ZNF3      | zinc finger protein 3                          | Multiple_Complex |
| TC0100012475.hg.1    | 8.02  | 8.6   | -1.5  | 0.0061 | 0.0204 MRPL20    | mitochondrial ribosomal protein L20            | Multiple_Complex |
| TC1700012384.hg.1    | 5.9   | 6.24  | -1.26 | 0.0061 | 0.0204 RAD51L3-R | RAD51L3-RFFL readthrough; HCG2039718, iso      | Multiple_Complex |



|                      |       |       |       |        |                  |                                                  |                  |
|----------------------|-------|-------|-------|--------|------------------|--------------------------------------------------|------------------|
| TC0800007888.hg.1    | 6.07  | 5.3   | 1.71  | 0.0061 | 0.0204 C8orf34   | chromosome 8 open reading frame 34               | Multiple_Complex |
| TC0200016687.hg.1    | 10.08 | 9.31  | 1.7   | 0.0061 | 0.0204 SFXN5     | sideroflexin 5                                   | Multiple_Complex |
| TC1700008844.hg.1    | 8.21  | 8.8   | -1.51 | 0.0061 | 0.0204 TTYH2     | tweety family member 2                           | Multiple_Complex |
| TC1100009929.hg.1    | 3.81  | 3.35  | 1.38  | 0.0061 | 0.0204 OR5111    | olfactory receptor, family 51, subfamily I, men  | Coding           |
| TC1700008191.hg.1    | 4.1   | 3.67  | 1.35  | 0.0061 | 0.0204 B4GALNT2  | beta-1,4-N-acetyl-galactosaminyl transferase     | Multiple_Complex |
| TC0200008499.hg.1    | 5.77  | 5.13  | 1.56  | 0.0061 | 0.0204 STAR77-AS | STAR77 antisense RNA 1                           | Multiple_Complex |
| TC0100017022.hg.1    | 3.97  | 3.56  | 1.33  | 0.0061 | 0.0205 GOLT1A    | golgi transport 1A                               | Multiple_Complex |
| TC2100006674.hg.1    | 5.61  | 5.09  | 1.44  | 0.0062 | 0.0205 CHODL     | chondrolectin                                    | Multiple_Complex |
| TC0100007564.hg.1    | 5.5   | 5.2   | 1.23  | 0.0062 | 0.0205 RAB42     | RAB42, member RAS oncogene family                | Multiple_Complex |
| TC0600007446.hg.1    | 4.46  | 3.96  | 1.41  | 0.0062 | 0.0205 OR2J1     | olfactory receptor, family 2, subfamily J, mem   | Pseudogene       |
| TC1700012193.hg.1    | 11.74 | 11.06 | 1.6   | 0.0062 | 0.0206 NDEL1     | nudE neurodevelopment protein 1-like 1           | Multiple_Complex |
| TC0200013376.hg.1    | 8.07  | 7.61  | 1.37  | 0.0062 | 0.0206 EIF2AK3   | eukaryotic translation initiation factor 2-alpha | Multiple_Complex |
| TC1300007208.hg.1    | 10.25 | 9.67  | 1.5   | 0.0062 | 0.0206 RNASEH2B  | ribonuclease H2, subunit B                       | Multiple_Complex |
| TC0X00010355.hg.1    | 3.89  | 4.46  | -1.49 | 0.0062 | 0.0207 TIMM8A    | translocase of inner mitochondrial membrane      | Multiple_Complex |
| TC1200012804.hg.1    | 5.49  | 6.11  | -1.53 | 0.0062 | 0.0207 PRIM1     | primase, DNA, polypeptide 1 (49kDa)              | Multiple_Complex |
| TC0200007835.hg.1    | 16.4  | 15.8  | 1.51  | 0.0062 | 0.0207 ACTR2     | ARP2 actin-related protein 2 homolog (yeast)     | Multiple_Complex |
| TC1200008669.hg.1    | 6.92  | 6.46  | 1.37  | 0.0062 | 0.0207 TDG       | thymine DNA glycosylase                          | Multiple_Complex |
| TC1700011294.hg.1    | 8.15  | 8.71  | -1.47 | 0.0062 | 0.0207 PTRH2     | peptidyl-tRNA hydrolase 2                        | Multiple_Complex |
| TC0300010026.hg.1    | 3.75  | 4.25  | -1.42 | 0.0062 | 0.0207 FBXO45    | F-box protein 45                                 | Coding           |
| TC1000011499.hg.1    | 6.81  | 7.23  | -1.34 | 0.0062 | 0.0207 ALDH18A1  | aldehyde dehydrogenase 18 family, member 1       | Multiple_Complex |
| TC0100008271.hg.1    | 11.26 | 10.02 | 2.37  | 0.0063 | 0.0208 RNF11     | ring finger protein 11                           | Multiple_Complex |
| TC0100007333.hg.1    | 11.08 | 11.85 | -1.71 | 0.0063 | 0.0208 PITHD1    | PITH (C-terminal proteasome-interacting dom      | Multiple_Complex |
| TC0600012432.hg.1    | 5.92  | 6.31  | -1.31 | 0.0063 | 0.0208 PGM3      | phosphoglucomutase 3                             | Multiple_Complex |
| TC0100018532.hg.1    | 7.28  | 7.83  | -1.46 | 0.0063 | 0.0209 PIGC      | phosphatidylinositol glycan anchor biosynthes    | Multiple_Complex |
| TC1900008544.hg.1    | 7.95  | 7.3   | 1.58  | 0.0063 | 0.0209 RCN3      | reticulocalbin 3, EF-hand calcium binding dom    | Multiple_Complex |
| TC1600006737.hg.1    | 4.34  | 4.01  | 1.26  | 0.0063 | 0.0209 VASN      | vasorin                                          | Coding           |
| TC1600006597.hg.1    | 6.4   | 6.71  | -1.23 | 0.0063 | 0.0209 MLST8     | MTOR associated protein, LST8 homolog            | Multiple_Complex |
| TC1600009193.hg.1    | 5.25  | 5.61  | -1.28 | 0.0063 | 0.0209 ZSCAN32   | zinc finger and SCAN domain containing 32        | Multiple_Complex |
| TC0600006864.hg.1    | 6.5   | 7.22  | -1.64 | 0.0063 | 0.0209 RIOK1     | RIO kinase 1                                     | Multiple_Complex |
| TSUnmapped00000537.h | 8.3   | 7.77  | 1.44  | 0.0063 | 0.0209 PRAMEF6   | PRAME family member 6 [Source:HGNC Symb          | Coding           |
| TSUnmapped00000781.h | 8.3   | 7.77  | 1.44  | 0.0063 | 0.0209 PRAMEF6   | PRAME family member 6 [Source:HGNC Symb          | Coding           |
| TC0300008140.hg.1    | 4.65  | 4     | 1.56  | 0.0063 | 0.0209 TMEM30C   | transmembrane protein 30C                        | Multiple_Complex |
| TC1900011673.hg.1    | 7.37  | 8.19  | -1.77 | 0.0063 | 0.0209 CCDC130   | coiled-coil domain containing 130                | Multiple_Complex |
| TC1600007489.hg.1    | 8.32  | 7.76  | 1.47  | 0.0063 | 0.0209 RNF40     | ring finger protein 40, E3 ubiquitin protein lig | Multiple_Complex |
| TC0200010252.hg.1    | 7.95  | 7.14  | 1.75  | 0.0063 | 0.021 ASNSD1     | asparagine synthetase domain containing 1        | Multiple_Complex |
| TC2000008759.hg.1    | 5.59  | 5.14  | 1.36  | 0.0063 | 0.021 FAM182B    | family with sequence similarity 182, member      | Multiple_Complex |
| TC1000006648.hg.1    | 9.06  | 8.58  | 1.4   | 0.0063 | 0.021 RBM17      | RNA binding motif protein 17                     | Multiple_Complex |
| TC0500010580.hg.1    | 12.58 | 12.11 | 1.39  | 0.0063 | 0.021 PRKAA1     | protein kinase, AMP-activated, alpha 1 catalyt   | Multiple_Complex |
| TC1900010503.hg.1    | 17.44 | 18.2  | -1.69 | 0.0063 | 0.021 TYROBP     | TYRO protein tyrosine kinase binding protein     | Multiple_Complex |
| TC1800008977.hg.1    | 9.16  | 8.25  | 1.89  | 0.0064 | 0.0211 CD226     | CD226 molecule                                   | Multiple_Complex |
| TC1300008824.hg.1    | 6.05  | 6.57  | -1.43 | 0.0064 | 0.0211 SLC25A30  | solute carrier family 25, member 30              | Multiple_Complex |
| TSUnmapped00000599.h | 4.73  | 4.43  | 1.24  | 0.0064 | 0.0211 PRAMEF8   | PRAME family member 8                            | Coding           |
| TC1600010627.hg.1    | 4.72  | 5.27  | -1.47 | 0.0064 | 0.0211 TPPP3     | tubulin polymerization-promoting protein fam     | Multiple_Complex |
| TC1000009879.hg.1    | 4.27  | 3.89  | 1.3   | 0.0064 | 0.0211 C10orf111 | chromosome 10 open reading frame 111             | Multiple_Complex |
| TC0300009363.hg.1    | 3.8   | 3.36  | 1.36  | 0.0064 | 0.0212 OTOL1     | otolin 1                                         | Coding           |
| TC0600008462.hg.1    | 3.53  | 3.88  | -1.27 | 0.0064 | 0.0212 COL19A1   | collagen, type XIX, alpha 1                      | Multiple_Complex |
| TC0900009922.hg.1    | 5.3   | 4.84  | 1.38  | 0.0064 | 0.0212 FAM205C   | family with sequence similarity 205, member      | Multiple_Complex |
| TC0400007770.hg.1    | 5.72  | 4.9   | 1.76  | 0.0064 | 0.0213 STATH     | statherin                                        | Multiple_Complex |
| TC1400010737.hg.1    | 8.42  | 8.86  | -1.36 | 0.0064 | 0.0213 KLHL28    | kelch-like family member 28                      | Multiple_Complex |
| TC1600011317.hg.1    | 9.21  | 9.55  | -1.26 | 0.0064 | 0.0213 NME4      | NME/NM23 nucleoside diphosphate kinase 4         | Multiple_Complex |
| TC1600008496.hg.1    | 5.12  | 5.64  | -1.43 | 0.0064 | 0.0213 NUDT7     | nudix hydrolase 7                                | Multiple_Complex |
| TC1700012391.hg.1    | 4.68  | 5.46  | -1.72 | 0.0064 | 0.0213 MYO19     | myosin XIX                                       | Multiple_Complex |
| TC1000009916.hg.1    | 5.36  | 6.15  | -1.73 | 0.0065 | 0.0213 CUBN      | cubilin (intrinsic factor-cobalamin receptor)    | Multiple_Complex |
| TC1600011343.hg.1    | 4.74  | 5.81  | -2.1  | 0.0065 | 0.0213 CLUAP1    | clusterin associated protein 1                   | Multiple_Complex |
| TC0500008544.hg.1    | 10.2  | 9.05  | 2.22  | 0.0065 | 0.0213 LMNB1     | lamin B1                                         | Multiple_Complex |
| TC0500012670.hg.1    | 3.75  | 3.34  | 1.32  | 0.0065 | 0.0213 GABRB2    | gamma-aminobutyric acid (GABA) A receptor,       | Multiple_Complex |
| TC2000006813.hg.1    | 5.75  | 6.19  | -1.36 | 0.0065 | 0.0214 MGME1     | mitochondrial genome maintenance exonucle        | Multiple_Complex |
| TC0700012996.hg.1    | 7.33  | 7.84  | -1.42 | 0.0065 | 0.0214 ZNF746    | zinc finger protein 746                          | Multiple_Complex |
| TC0300007517.hg.1    | 6.24  | 5.8   | 1.36  | 0.0065 | 0.0214 CACNA1D   | calcium channel, voltage-dependent, L type, a    | Multiple_Complex |
| TC0600008601.hg.1    | 4.47  | 5     | -1.45 | 0.0065 | 0.0214 IRAK1BP1  | interleukin 1 receptor associated kinase 1 bin   | Multiple_Complex |
| TC1000008474.hg.1    | 7.68  | 8.49  | -1.75 | 0.0065 | 0.0214 HHEX      | hematopoietically expressed homeobox             | Multiple_Complex |
| TC2000008650.hg.1    | 6.02  | 5.63  | 1.31  | 0.0065 | 0.0214 THBD      | thrombomodulin                                   | Coding           |
| TC1500006959.hg.1    | 6.51  | 6.89  | -1.3  | 0.0065 | 0.0215 CHST14    | carbohydrate (N-acetylgalactosamine 4-0) sul     | Coding           |
| TC0900011385.hg.1    | 8.38  | 9.02  | -1.56 | 0.0065 | 0.0215 PSMD5     | proteasome 26S subunit, non-ATPase 5             | Multiple_Complex |
| TC0700013599.hg.1    | 6.44  | 6.12  | 1.25  | 0.0065 | 0.0215 ACHE      | acetylcholinesterase (Yt blood group)            | Coding           |
| TC1200007425.hg.1    | 9.17  | 9.69  | -1.44 | 0.0065 | 0.0216 ARID2     | AT rich interactive domain 2 (ARID, RFX-like)    | Multiple_Complex |
| TSUnmapped00000006.h | 6.63  | 6.07  | 1.48  | 0.0065 | 0.0216 RPS6KA1   | ribosomal protein S6 kinase, 90kDa, polypepti    | Coding           |
| TC0100017084.hg.1    | 5.09  | 6.32  | -2.34 | 0.0066 | 0.0216 CTSE      | cathepsin E                                      | Multiple_Complex |
| TC0100017261.hg.1    | 4.61  | 3.9   | 1.63  | 0.0066 | 0.0217 SPATA45   | spermatogenesis associated 45                    | Multiple_Complex |
| TC1400006552.hg.1    | 5.09  | 4.75  | 1.27  | 0.0066 | 0.0217 RP11-998D | Transcript Identified by AceView, Entrez Gene    | NonCoding        |

|                      |       |       |       |        |                   |                                                  |                  |
|----------------------|-------|-------|-------|--------|-------------------|--------------------------------------------------|------------------|
| TC2200006630.hg.1    | 9.62  | 10.58 | -1.94 | 0.0066 | 0.0217 TANGO2     | transport and golgi organization 2 homolog       | Multiple_Complex |
| TC1100010054.hg.1    | 3.95  | 3.3   | 1.56  | 0.0066 | 0.0218 NRIP3      | nuclear receptor interacting protein 3           | Multiple_Complex |
| TC1700006899.hg.1    | 11.25 | 10.69 | 1.48  | 0.0066 | 0.0218 MAP2K4; N  | mitogen-activated protein kinase kinase 4; mi    | Multiple_Complex |
| TC0200008955.hg.1    | 6.46  | 7.05  | -1.51 | 0.0066 | 0.0218 PSD4       | pleckstrin and Sec7 domain containing 4          | Multiple_Complex |
| TC1100010393.hg.1    | 6.21  | 5.74  | 1.39  | 0.0066 | 0.0218 SLC5A12    | solute carrier family 5 (sodium/monocarboxyl     | Multiple_Complex |
| TC0600007158.hg.1    | 6.3   | 6.01  | 1.22  | 0.0066 | 0.0218 SOX4       | SRY box 4                                        | Multiple_Complex |
| TC2100008171.hg.1    | 5.17  | 4.28  | 1.86  | 0.0066 | 0.0218 LCASL      | Leber congenital amaurosis 5-like                | Multiple_Complex |
| TC0X00006701.hg.1    | 5.01  | 5.64  | -1.55 | 0.0066 | 0.0218 TXLNG      | taxilin gamma                                    | Multiple_Complex |
| TC0700009770.hg.1    | 4.27  | 3.74  | 1.44  | 0.0066 | 0.0218 DPP6       | dipeptidyl-peptidase 6                           | Multiple_Complex |
| TC1900006662.hg.1    | 5.07  | 4.56  | 1.43  | 0.0066 | 0.0218 NMRK2      | nicotinamide riboside kinase 2                   | Multiple_Complex |
| TC0900007752.hg.1    | 4.07  | 3.52  | 1.46  | 0.0066 | 0.0218 NTRK2      | neurotrophic tyrosine kinase, receptor, type 2   | Multiple_Complex |
| TC0100016167.hg.1    | 4.45  | 3.95  | 1.41  | 0.0066 | 0.0218 NR13       | nuclear receptor subfamily 1, group I, membe     | Multiple_Complex |
| TC1900011139.hg.1    | 4.71  | 4.34  | 1.29  | 0.0066 | 0.0218 SLC17A7    | solute carrier family 17 (vesicular glutamate tr | Multiple_Complex |
| TC0200016667.hg.1    | 8.08  | 8.58  | -1.42 | 0.0066 | 0.0218 GPR75-ASB  | GPR75-ASB3 readthrough                           | Multiple_Complex |
| TC1300008044.hg.1    | 8.16  | 8.73  | -1.48 | 0.0066 | 0.0218 ARHGEF7    | Rho guanine nucleotide exchange factor 7         | Multiple_Complex |
| TC0100008621.hg.1    | 8.09  | 7.49  | 1.52  | 0.0067 | 0.0219 LEPR; LEPR | leptin receptor; leptin receptor overlapping tr  | Multiple_Complex |
| TC0600011379.hg.1    | 5.01  | 5.57  | -1.47 | 0.0067 | 0.0219 MDC1       | mediator of DNA-damage checkpoint 1              | Multiple_Complex |
| TC2200007114.hg.1    | 13.35 | 12.19 | 2.23  | 0.0067 | 0.0219 YWHAH      | tyrosine 3-monooxygenase/tryptophan 5-mor        | Multiple_Complex |
| TC1700008561.hg.1    | 4.01  | 3.53  | 1.39  | 0.0067 | 0.022 KCNH6       | potassium channel, voltage gated eag related     | Coding           |
| TSUnmapped00000215.h | 8.74  | 8.83  | -1.06 | 0.0067 | 0.022 TCF20       | transcription factor 20 (AR1)                    | Coding           |
| TSUnmapped00000554.h | 8.74  | 8.83  | -1.06 | 0.0067 | 0.022 TCF20       | transcription factor 20 (AR1)                    | Coding           |
| TC2200009352.hg.1    | 8.01  | 8.65  | -1.55 | 0.0067 | 0.022 LOC400927   | TPE and PTEN homologous inositol lipid pho       | Multiple_Complex |
| TC0200011129.hg.1    | 5.63  | 4.95  | 1.61  | 0.0067 | 0.022 SAG         | S-antigen; retina and pineal gland (arrestin)    | Multiple_Complex |
| TC2200007790.hg.1    | 8.66  | 9.28  | -1.53 | 0.0067 | 0.022 TRABD       | TraB domain containing                           | Multiple_Complex |
| TC0X00007301.hg.1    | 4.58  | 3.98  | 1.51  | 0.0067 | 0.022 XAGE5       | X antigen family, member 5                       | Multiple_Complex |
| TC1700012485.hg.1    | 5.87  | 5.41  | 1.37  | 0.0067 | 0.022 MYADML2     | myeloid-associated differentiation marker-like   | Coding           |
| TC2100008555.hg.1    | 6.47  | 7.18  | -1.64 | 0.0067 | 0.022 TIAM1       | T-cell lymphoma invasion and metastasis 1        | Multiple_Complex |
| TC1900006502.hg.1    | 4.64  | 4.95  | -1.23 | 0.0067 | 0.0221 WDR18      | WD repeat domain 18                              | Multiple_Complex |
| TC0200016661.hg.1    | 4.52  | 3.82  | 1.62  | 0.0067 | 0.0221 C2orf61    | chromosome 2 open reading frame 61               | Multiple_Complex |
| TC0600013201.hg.1    | 4.94  | 4.32  | 1.53  | 0.0067 | 0.0221 TAAR1      | trace amine associated receptor 1                | Coding           |
| TC1200007786.hg.1    | 4.5   | 3.84  | 1.59  | 0.0067 | 0.0221 OR6C1      | olfactory receptor, family 6, subfamily C, men   | Coding           |
| TC1100010942.hg.1    | 4.95  | 4.25  | 1.62  | 0.0068 | 0.0222 OR5B2      | olfactory receptor, family 5, subfamily B, men   | Coding           |
| TSUnmapped00000339.h | 6.3   | 5.78  | 1.44  | 0.0068 | 0.0222 SURF1      | surfeit 1                                        | Coding           |
| TC0100008417.hg.1    | 5.62  | 5.22  | 1.31  | 0.0068 | 0.0223 PCSK9      | proprotein convertase subtilisin/kexin type 9    | Multiple_Complex |
| TC0900012258.hg.1    | 9.93  | 10.28 | -1.28 | 0.0068 | 0.0223 MFSD14C    | major facilitator superfamily domain containir   | Multiple_Complex |
| TC1000012586.hg.1    | 6.52  | 7.41  | -1.85 | 0.0068 | 0.0223 SEC31B     | SEC31 homolog B, COPII coat complex compo        | Multiple_Complex |
| TC1100011637.hg.1    | 3.6   | 3.18  | 1.34  | 0.0068 | 0.0223 OR2AT4     | olfactory receptor, family 2, subfamily AT, me   | Coding           |
| TC1700011059.hg.1    | 8.97  | 9.34  | -1.29 | 0.0068 | 0.0223 SLC35B1    | solute carrier family 35, member B1              | Multiple_Complex |
| TC0800009878.hg.1    | 11.34 | 11.65 | -1.24 | 0.0068 | 0.0223 ENTPD4; LC | ectonucleoside triphosphate diphosphohydroly     | Multiple_Complex |
| TC1600007374.hg.1    | 7.01  | 7.42  | -1.33 | 0.0068 | 0.0223 NFATC2IP;  | nuclear factor of activated T-cells, cytoplasmic | Multiple_Complex |
| TC1700012190.hg.1    | 11.98 | 11.43 | 1.47  | 0.0068 | 0.0223 EIF4A1; SN | eukaryotic translation initiation factor 4A1; sn | Multiple_Complex |
| TC1100011656.hg.1    | 5.61  | 5.29  | 1.25  | 0.0068 | 0.0223 SERPINH1   | Jeck2013 ANTISENSE, coding, INTERNAL, intro      | NonCoding        |
| TC0600007284.hg.1    | 12.83 | 11.33 | 2.84  | 0.0068 | 0.0223 HIST1H4E   | histone cluster 1, H4e                           | Multiple_Complex |
| TC0Y00006573.hg.1    | 3.82  | 3.47  | 1.28  | 0.0068 | 0.0224 TSPY3; LOC | Homo sapiens testis specific protein, Y-linked   | Multiple_Complex |
| TC0400012891.hg.1    | 7.12  | 7.48  | -1.29 | 0.0068 | 0.0224 NELFA; MIF | negative elongation factor complex member A      | Multiple_Complex |
| TC0800011445.hg.1    | 4.86  | 4.15  | 1.64  | 0.0068 | 0.0224 ANGPT1     | angiopoietin 1                                   | Multiple_Complex |
| TC0200016559.hg.1    | 4.12  | 4.56  | -1.36 | 0.0068 | 0.0224 BBS5       | Bardet-Biedl syndrome 5                          | Multiple_Complex |
| TC0X00009836.hg.1    | 5.5   | 6.24  | -1.68 | 0.0069 | 0.0224 SPIN3      | spindlin family, member 3                        | Multiple_Complex |
| TC1600007514.hg.1    | 6.63  | 7.29  | -1.59 | 0.0069 | 0.0224 KAT8       | K(lysine) acetyltransferase 8                    | Multiple_Complex |
| TC0300006873.hg.1    | 3.34  | 3     | 1.27  | 0.0069 | 0.0224 LRRC3B     | leucine rich repeat containing 3B                | Multiple_Complex |
| TC0200011105.hg.1    | 4.61  | 4.31  | 1.23  | 0.0069 | 0.0225 CHRNG      | cholinergic receptor, nicotinic gamma            | Multiple_Complex |
| TC1900011789.hg.1    | 8.87  | 9.41  | -1.46 | 0.0069 | 0.0226 EMC10      | ER membrane protein complex subunit 10           | Multiple_Complex |
| TC1900011392.hg.1    | 6.08  | 6.42  | -1.27 | 0.0069 | 0.0226 TFPT       | TCF3 (E2A) fusion partner (in childhood Leuke    | Coding           |
| TSUnmapped00000349.h | 7.53  | 8.01  | -1.4  | 0.0069 | 0.0226 FBL        | fibrillarlin                                     | Coding           |
| TC0X00008246.hg.1    | 5.64  | 6.25  | -1.52 | 0.0069 | 0.0226 SLC25A43   | solute carrier family 25, member 43              | Multiple_Complex |
| TC1200009085.hg.1    | 4.38  | 4.01  | 1.29  | 0.0069 | 0.0226 SRRM4      | serine/arginine repetitive matrix 4              | Multiple_Complex |
| TC0100016402.hg.1    | 3.57  | 3.35  | 1.16  | 0.0069 | 0.0227 MYOC       | myocilin, trabecular meshwork inducible gluc     | Coding           |
| TC0100013650.hg.1    | 4.54  | 4.18  | 1.28  | 0.0069 | 0.0227 A3GALT2    | alpha 1,3-galactosyltransferase 2                | Coding           |
| TC0100016755.hg.1    | 4.05  | 3.65  | 1.33  | 0.007  | 0.0227 BRINP3     | bone morphogenetic protein/retinoic acid ind     | Multiple_Complex |
| TC2000006551.hg.1    | 7.79  | 8.1   | -1.23 | 0.007  | 0.0228 ATRN       | attractin                                        | Multiple_Complex |
| TC1900011745.hg.1    | 6.51  | 7.27  | -1.69 | 0.007  | 0.0228 ARHGEF1    | Rho guanine nucleotide exchange factor 1         | Multiple_Complex |
| TC0700008337.hg.1    | 5.98  | 6.41  | -1.35 | 0.007  | 0.0228 VPS50      | VPS50 EARP/GARPII complex subunit                | Multiple_Complex |
| TC0500009097.hg.1    | 4.68  | 5.09  | -1.33 | 0.007  | 0.0228 SYNPO      | synaptopodin                                     | Multiple_Complex |
| TC1900008623.hg.1    | 9.93  | 10.91 | -1.97 | 0.007  | 0.0228 SIGLEC9    | sialic acid binding Ig-like lectin 9             | Coding           |
| TC0400008666.hg.1    | 7.79  | 8.31  | -1.44 | 0.007  | 0.0228 ABHD18     | abhydrolase domain containing 18                 | Multiple_Complex |
| TC0600012827.hg.1    | 5.06  | 4.31  | 1.69  | 0.007  | 0.0229 WASF1      | WAS protein family, member 1                     | Coding           |
| TC0X00011378.hg.1    | 4     | 3.48  | 1.43  | 0.007  | 0.0229 RAB40A     | RAB40A, member RAS oncogene family               | Coding           |
| TC1600007112.hg.1    | 6.9   | 6.53  | 1.3   | 0.0071 | 0.023 CCP110      | centriolar coiled coil protein 110kDa            | Multiple_Complex |
| TC0100018199.hg.1    | 11.87 | 12.81 | -1.91 | 0.0071 | 0.023 SRRM1       | serine/arginine repetitive matrix 1              | Multiple_Complex |
| TC0500013297.hg.1    | 6.47  | 7.01  | -1.46 | 0.0071 | 0.023 AMACR       | alpha-methylacyl-CoA racemase                    | Multiple_Complex |

|                      |       |       |       |        |                 |                                                |                  |
|----------------------|-------|-------|-------|--------|-----------------|------------------------------------------------|------------------|
| TC0100015434.hg.1    | 9.63  | 10.07 | -1.36 | 0.0071 | 0.023 GDAP2     | ganglioside induced differentiation associated | Multiple_Complex |
| TC1700007017.hg.1    | 10.06 | 9.39  | 1.6   | 0.0071 | 0.023 SNORD49A  | small nucleolar RNA, C/D box 49A; small nucle  | Multiple_Complex |
| TC0500013426.hg.1    | 8.44  | 9.09  | -1.57 | 0.0071 | 0.0231 TBC1D9B  | TBC1 domain family, member 9B (with GRAM       | Multiple_Complex |
| TC0200009041.hg.1    | 8.81  | 9.16  | -1.28 | 0.0071 | 0.0231 DDX18    | DEAD (Asp-Glu-Ala-Asp) box polypeptide 18      | Multiple_Complex |
| TC0200013232.hg.1    | 7.06  | 6.51  | 1.47  | 0.0071 | 0.0231 SUCLG1   | succinate-CoA ligase, alpha subunit            | Multiple_Complex |
| TC0200013019.hg.1    | 4.6   | 4.81  | -1.16 | 0.0071 | 0.0232 MCEE     | methylmalonyl CoA epimerase                    | Multiple_Complex |
| TC0X00009271.hg.1    | 5.51  | 5.12  | 1.31  | 0.0071 | 0.0232 ARX      | aristales related homeobox                     | Coding           |
| TC1200008942.hg.1    | 7     | 7.63  | -1.54 | 0.0071 | 0.0232 PLBD2    | phospholipase B domain containing 2            | Multiple_Complex |
| TC0800009831.hg.1    | 4.57  | 4.23  | 1.27  | 0.0071 | 0.0233 LGI3     | leucine-rich repeat LGI family, member 3       | Multiple_Complex |
| TC0900010837.hg.1    | 8.8   | 9.38  | -1.49 | 0.0072 | 0.0233 FAM120AC | family with sequence similarity 120A opposite  | Multiple_Complex |
| TC0800011679.hg.1    | 6.94  | 6.39  | 1.47  | 0.0072 | 0.0233 ATAD2    | ATPase family, AAA domain containing 2         | Multiple_Complex |
| TC1000012090.hg.1    | 10.39 | 9.87  | 1.43  | 0.0072 | 0.0234 IKZF5    | IKAROS family zinc finger 5                    | Multiple_Complex |
| TC0300013255.hg.1    | 6.73  | 7.36  | -1.54 | 0.0072 | 0.0234 ZMAT3    | zinc finger, matrin-type 3                     | Multiple_Complex |
| TC1600011562.hg.1    | 11.54 | 12    | -1.37 | 0.0072 | 0.0234 ZNF19    | zinc finger protein 19                         | Multiple_Complex |
| TC0100018394.hg.1    | 7.9   | 7.48  | 1.34  | 0.0072 | 0.0235 TTC34    | tetratricopeptide repeat domain 34             | Multiple_Complex |
| TC0500013292.hg.1    | 6.2   | 5.72  | 1.39  | 0.0072 | 0.0235 11-Mar   | membrane associated ring finger 11             | Coding           |
| TC0100012456.hg.1    | 5.74  | 5.32  | 1.34  | 0.0072 | 0.0236 FAM132A  | family with sequence similarity 132, member    | Multiple_Complex |
| TC1600011257.hg.1    | 4.32  | 3.95  | 1.29  | 0.0072 | 0.0236 SLC22A31 | solute carrier family 22, member 31            | Multiple_Complex |
| TC1500010360.hg.1    | 3.51  | 4.1   | -1.5  | 0.0072 | 0.0236 DET1     | de-etiolated homolog 1 (Arabidopsis)           | NonCoding        |
| TC1000007748.hg.1    | 4.69  | 4.24  | 1.37  | 0.0073 | 0.0236 CDK1     | cyclin-dependent kinase 1                      | Multiple_Complex |
| TC1200010908.hg.1    | 8.41  | 9.8   | -2.63 | 0.0073 | 0.0236 STAT2    | signal transducer and activator of transcrip   | Multiple_Complex |
| TC2100008392.hg.1    | 13.93 | 12.88 | 2.07  | 0.0073 | 0.0236 ITGB2    | integrin, beta 2 (complement component 3 re    | Multiple_Complex |
| TC0800012363.hg.1    | 4.41  | 3.95  | 1.38  | 0.0073 | 0.0236 KHDRBS3  | KH domain containing, RNA binding, signal tra  | NonCoding        |
| TC1700012484.hg.1    | 4.85  | 5.17  | -1.25 | 0.0073 | 0.0237 PYCR1    | pyrroline-5-carboxylate reductase 1            | Multiple_Complex |
| TSUnmapped00000284.h | 4.25  | 3.64  | 1.52  | 0.0073 | 0.0237 LRP6     | LDL receptor related protein 6                 | Coding           |
| TC2200007035.hg.1    | 8.58  | 7.66  | 1.9   | 0.0073 | 0.0238 UQCR10   | ubiquinol-cytochrome c reductase, complex II   | Multiple_Complex |
| TC0200010729.hg.1    | 9.54  | 9     | 1.46  | 0.0073 | 0.0238 XRCC5    | Transcript Identified by AceView, Entrez Gene  | Unassigned       |
| TC1000008716.hg.1    | 9.07  | 9.44  | -1.3  | 0.0073 | 0.0238 GBF1     | golgi brefeldin A resistant guanine nucleotide | Multiple_Complex |
| TC1800006484.hg.1    | 5.65  | 4.85  | 1.75  | 0.0073 | 0.0238 NDC80    | NDC80 kinetochore complex component            | Multiple_Complex |
| TC0100016618.hg.1    | 4.7   | 4.3   | 1.32  | 0.0073 | 0.0238 ZNF648   | zinc finger protein 648                        | Coding           |
| TC0500008349.hg.1    | 7.78  | 8.32  | -1.46 | 0.0073 | 0.0238 YTHDC2   | YTH domain containing 2                        | Multiple_Complex |
| TC0900007098.hg.1    | 6.77  | 7.2   | -1.34 | 0.0073 | 0.0238 RGP1     | RGP1 homolog, RAB6A GEF complex partner 1      | Multiple_Complex |
| TC1500010900.hg.1    | 7.46  | 6.64  | 1.76  | 0.0074 | 0.0239 MTHFS    | 5,10-methenyltetrahydrofolate synthetase (5-   | Multiple_Complex |
| TC1200008318.hg.1    | 6.96  | 7.4   | -1.36 | 0.0074 | 0.024 METTL25   | methyltransferase like 25                      | Multiple_Complex |
| TC1100013045.hg.1    | 7.5   | 6.9   | 1.52  | 0.0074 | 0.024 SIPA1     | signal-induced proliferation-associated 1      | Multiple_Complex |
| TC1600008174.hg.1    | 5.17  | 5.37  | -1.15 | 0.0074 | 0.024 THAP11    | THAP domain containing 11                      | Multiple_Complex |
| TC0300013104.hg.1    | 6     | 6.34  | -1.27 | 0.0074 | 0.024 EIF5A2    | eukaryotic translation initiation factor 5A2   | Multiple_Complex |
| TC2100008550.hg.1    | 5.02  | 5.49  | -1.39 | 0.0074 | 0.024 KRTAP19-1 | keratin associated protein 19-1                | Coding           |
| TC1800008427.hg.1    | 4.39  | 4.74  | -1.28 | 0.0074 | 0.024 KLHL14    | kelch-like family member 14                    | Coding           |
| TC0700008265.hg.1    | 4.83  | 5.39  | -1.48 | 0.0074 | 0.0241 ADAM22   | ADAM metallopeptidase domain 22                | Multiple_Complex |
| TC0100007489.hg.1    | 6.15  | 6.66  | -1.43 | 0.0074 | 0.0241 NUDC     | nudC nuclear distribution protein              | Multiple_Complex |
| TC1600011184.hg.1    | 6.84  | 5.94  | 1.88  | 0.0074 | 0.0241 KLHDC4   | Transcript Identified by AceView, Entrez Gene  | Unassigned       |
| TC2100007846.hg.1    | 4.11  | 4.44  | -1.25 | 0.0074 | 0.0241 NGAMT1   | N-6 adenine-specific DNA methyltransferase 1   | Multiple_Complex |
| TC0X00009654.hg.1    | 5.14  | 5.66  | -1.43 | 0.0074 | 0.0241 GPKOW    | G-patch domain and KOW motifs                  | Multiple_Complex |
| TC1100009969.hg.1    | 4.92  | 5.6   | -1.6  | 0.0074 | 0.0241 APBB1    | amyloid beta (A4) precursor protein-binding, f | Multiple_Complex |
| TC1700010816.hg.1    | 6.65  | 5.87  | 1.71  | 0.0074 | 0.0241 ATXN7L3  | ataxin 7-like 3                                | Multiple_Complex |
| TC0600014196.hg.1    | 8.57  | 7.81  | 1.69  | 0.0074 | 0.0241 SNX9     | sorting nexin 9                                | Multiple_Complex |
| TC1900009871.hg.1    | 7.47  | 7.87  | -1.32 | 0.0074 | 0.0241 WIZ      | widely interspaced zinc finger motifs          | Multiple_Complex |
| TC0Y00006873.hg.1    | 6.97  | 6.57  | 1.32  | 0.0075 | 0.0241 CRLF2    | cytokine receptor-like factor 2                | Multiple_Complex |
| TC0100010855.hg.1    | 10.97 | 10.17 | 1.74  | 0.0075 | 0.0241 NPL      | N-acetylneuraminate pyruvate lyase (dihydroc   | Multiple_Complex |
| TC1700007296.hg.1    | 14.11 | 13.81 | 1.24  | 0.0075 | 0.0241 MTRNR2L1 | MT-RNR2-like 1                                 | Coding           |
| TC0500012491.hg.1    | 5.56  | 5.97  | -1.33 | 0.0075 | 0.0242 ZNF300   | zinc finger protein 300                        | Coding           |
| TC1600008402.hg.1    | 10.17 | 9.52  | 1.57  | 0.0075 | 0.0242 PSMD7    | proteasome 26S subunit, non-ATPase 7           | Multiple_Complex |
| TC0900008667.hg.1    | 3.94  | 3.55  | 1.31  | 0.0075 | 0.0242 OR1N2    | olfactory receptor, family 1, subfamily N, men | Coding           |
| TSUnmapped00000594.h | 5.37  | 5.02  | 1.28  | 0.0075 | 0.0242 GREM1    | gremlin 1, DAN family BMP antagonist [Source   | Coding           |
| TC0200016302.hg.1    | 5.9   | 5.17  | 1.65  | 0.0075 | 0.0242 PRR21    | proline rich 21                                | Coding           |
| TC1000008328.hg.1    | 7.61  | 8.33  | -1.64 | 0.0075 | 0.0243 FAM35A   | family with sequence similarity 35, member A   | Multiple_Complex |
| TC1000009287.hg.1    | 4.34  | 3.9   | 1.35  | 0.0075 | 0.0243 FOXI2    | forkhead box I2                                | Coding           |
| TC2000008210.hg.1    | 6.09  | 5.83  | 1.2   | 0.0075 | 0.0243 AVP      | arginine vasopressin                           | Multiple_Complex |
| TC1200011057.hg.1    | 7.14  | 6.32  | 1.76  | 0.0075 | 0.0243 RPL14    | Transcript Identified by AceView, Entrez Gene  | Unassigned       |
| TC1200011108.hg.1    | 5.41  | 5.01  | 1.32  | 0.0075 | 0.0243 WIF1     | WNT inhibitory factor 1                        | Coding           |
| TC1600011050.hg.1    | 3.72  | 3.97  | -1.19 | 0.0075 | 0.0243 KCNG4    | potassium channel, voltage gated modifier sul  | Coding           |
| TC0400010171.hg.1    | 4.84  | 5.36  | -1.43 | 0.0075 | 0.0243 LCORL    | Transcript Identified by AceView, Entrez Gene  | Coding           |
| TC0700012078.hg.1    | 6.57  | 5.96  | 1.53  | 0.0075 | 0.0243 SH2B2    | Memczak2013 ANTISENSE, CDS, coding, INTEF      | NonCoding        |
| TC1600009220.hg.1    | 7.1   | 7.49  | -1.31 | 0.0075 | 0.0243 TFAP4    | transcription factor AP-4 (activating enhancer | Multiple_Complex |
| TSUnmapped00000446.h | 9.14  | 9.65  | -1.43 | 0.0075 | 0.0244 INPP5D   | inositol polyphosphate-5-phosphatase D         | Coding           |
| TC1100012969.hg.1    | 3.91  | 3.62  | 1.22  | 0.0075 | 0.0244 CALCB    | calcitonin-related polypeptide beta            | Multiple_Complex |
| TC1700011262.hg.1    | 5.42  | 4.86  | 1.47  | 0.0075 | 0.0244 C17orf47 | chromosome 17 open reading frame 47            | Coding           |
| TC0600011534.hg.1    | 6.12  | 6.65  | -1.44 | 0.0075 | 0.0244 WDR46; M | WD repeat domain 46; microRNA 6873             | Multiple_Complex |
| TC0500007725.hg.1    | 6.72  | 7.55  | -1.78 | 0.0076 | 0.0244 BDP1     | B double prime 1, subunit of RNA polymerase    | Multiple_Complex |

|                   |       |       |       |        |                  |                                                        |                  |
|-------------------|-------|-------|-------|--------|------------------|--------------------------------------------------------|------------------|
| TC1900006480.hg.1 | 5.36  | 5     | 1.28  | 0.0076 | 0.0244 PALM      | paralectin                                             | Multiple_Complex |
| TC1600010869.hg.1 | 3.24  | 3.03  | 1.16  | 0.0076 | 0.0244 BCAR1     | breast cancer anti-estrogen resistance 1               | Multiple_Complex |
| TC0500007123.hg.1 | 7.22  | 6.59  | 1.55  | 0.0076 | 0.0244 DNAJC21   | DnaJ (Hsp40) homolog, subfamily C, member              | Multiple_Complex |
| TC0800009529.hg.1 | 8.79  | 7.84  | 1.93  | 0.0076 | 0.0245 PPP1R3B   | protein phosphatase 1, regulatory subunit 3B           | Coding           |
| TC2000007016.hg.1 | 5.66  | 4.96  | 1.61  | 0.0076 | 0.0245 GINS1     | GINS complex subunit 1 (Psf1 homolog)                  | Multiple_Complex |
| TC1700012415.hg.1 | 5.89  | 6.62  | -1.66 | 0.0076 | 0.0245 KAT2A     | K(lysine) acetyltransferase 2A                         | Multiple_Complex |
| TC1500010880.hg.1 | 5.36  | 4.82  | 1.45  | 0.0076 | 0.0245 TIPIN     | TIMELESS interacting protein                           | Multiple_Complex |
| TC0200012159.hg.1 | 3.99  | 3.47  | 1.43  | 0.0076 | 0.0245 CAPN13    | calpain 13                                             | Multiple_Complex |
| TC0400012452.hg.1 | 7.59  | 8.24  | -1.57 | 0.0076 | 0.0245 FBXO8     | F-box protein 8                                        | Coding           |
| TC1100006995.hg.1 | 4.66  | 4.36  | 1.23  | 0.0076 | 0.0245 SAA1      | serum amyloid A1                                       | Multiple_Complex |
| TC1100006547.hg.1 | 4.31  | 4.5   | -1.14 | 0.0076 | 0.0246 MRPL23    | mitochondrial ribosomal protein L23                    | Multiple_Complex |
| TC0200015887.hg.1 | 10.66 | 10.06 | 1.52  | 0.0076 | 0.0246 CUL3      | cullin 3                                               | Multiple_Complex |
| TC1300008219.hg.1 | 3.87  | 3.24  | 1.55  | 0.0076 | 0.0246 TPTE2     | transmembrane phosphoinositide 3-phosphatase           | Multiple_Complex |
| TC0100011999.hg.1 | 5.3   | 5.92  | -1.55 | 0.0077 | 0.0247 NTPCR     | nucleoside-triphosphatase, cancer-related              | Multiple_Complex |
| TC0100008289.hg.1 | 10.89 | 10.22 | 1.59  | 0.0077 | 0.0247 OSBPL9    | oxysterol binding protein-like 9                       | Multiple_Complex |
| TC0400010682.hg.1 | 5.09  | 5.57  | -1.39 | 0.0077 | 0.0247 SGCB      | sarcoglycan beta                                       | Coding           |
| TC0400008455.hg.1 | 5.89  | 5.46  | 1.36  | 0.0077 | 0.0247 ANK2      | Transcript Identified by AceView, Entrez Gene          | Unassigned       |
| TC0500009620.hg.1 | 8.84  | 9.49  | -1.57 | 0.0077 | 0.0247 RGS14     | regulator of G-protein signaling 14                    | Multiple_Complex |
| TC0100018306.hg.1 | 3.47  | 3.2   | 1.21  | 0.0077 | 0.0247 CADM3     | cell adhesion molecule 3                               | Coding           |
| TC0500009599.hg.1 | 5.41  | 5.87  | -1.38 | 0.0077 | 0.0248 TSPAN17   | tetraspanin 17                                         | Multiple_Complex |
| TC0500009787.hg.1 | 5.17  | 5.74  | -1.48 | 0.0077 | 0.0248 CCDC127   | coiled-coil domain containing 127                      | Multiple_Complex |
| TC0700011510.hg.1 | 6.06  | 5.58  | 1.39  | 0.0077 | 0.0248 RFC2      | replication factor C subunit 2                         | Multiple_Complex |
| TC0X00007951.hg.1 | 6.08  | 5.68  | 1.32  | 0.0077 | 0.0249 ARMCX3    | armadillo repeat containing, X-linked 3                | Multiple_Complex |
| TC0600012011.hg.1 | 5     | 4.55  | 1.37  | 0.0077 | 0.0249 DEFB110   | defensin, beta 110                                     | Coding           |
| TC1500008225.hg.1 | 4.93  | 5.47  | -1.46 | 0.0077 | 0.0249 MRPS11    | mitochondrial ribosomal protein S11                    | Multiple_Complex |
| TC1200007356.hg.1 | 3.82  | 3.5   | 1.25  | 0.0077 | 0.0249 MUC19     | mucin 19, oligomeric                                   | Multiple_Complex |
| TC0700008918.hg.1 | 4.7   | 4.2   | 1.42  | 0.0078 | 0.0249 KCND2     | potassium channel, voltage gated Shal related          | Multiple_Complex |
| TC2100007373.hg.1 | 3.88  | 3.62  | 1.2   | 0.0078 | 0.0249 KRTAP10-4 | keratin associated protein 10-4                        | Multiple_Complex |
| TC0100013949.hg.1 | 7.3   | 7.82  | -1.43 | 0.0078 | 0.025 SLC6A9     | solute carrier family 6 (neurotransmitter transporter) | Multiple_Complex |
| TC0900012080.hg.1 | 7.61  | 8.41  | -1.75 | 0.0078 | 0.025 ARRDC1-AS  | ARRDC1 antisense RNA 1                                 | Multiple_Complex |
| TC0600008078.hg.1 | 5.41  | 5.11  | 1.23  | 0.0078 | 0.0251 SLC22A7   | solute carrier family 22 (organic anion transporter)   | Multiple_Complex |
| TC1400008014.hg.1 | 8.75  | 9.53  | -1.73 | 0.0078 | 0.0251 RIN3      | Ras and Rab interactor 3                               | Multiple_Complex |
| TC1000012604.hg.1 | 6.66  | 7.24  | -1.5  | 0.0078 | 0.0251 METTL10   | methyltransferase like 10                              | Multiple_Complex |
| TC1400006652.hg.1 | 5.72  | 5.13  | 1.51  | 0.0078 | 0.0251 ABHD4     | abhydrolase domain containing 4                        | Multiple_Complex |
| TC0X00008136.hg.1 | 8.03  | 8.51  | -1.4  | 0.0078 | 0.0251 ALG13     | ALG13, UDP-N-acetylglucosaminyltransferase             | Multiple_Complex |
| TC1100011404.hg.1 | 5.76  | 5.28  | 1.4   | 0.0078 | 0.0251 MRPL21    | mitochondrial ribosomal protein L21                    | Multiple_Complex |
| TC0800008267.hg.1 | 8.7   | 9.19  | -1.41 | 0.0078 | 0.0251 INTS8     | integrator complex subunit 8                           | Multiple_Complex |
| TC1200012680.hg.1 | 5.16  | 4.73  | 1.35  | 0.0078 | 0.0252 ACS3      | acyl-CoA synthetase short-chain family member          | Multiple_Complex |
| TC0200006788.hg.1 | 6.49  | 7.21  | -1.64 | 0.0078 | 0.0252 DDX1      | DEAD (Asp-Glu-Ala-Asp) box helicase 1                  | Multiple_Complex |
| TC1100006492.hg.1 | 6.18  | 6.83  | -1.56 | 0.0078 | 0.0252 PNPLA2    | patatin-like phospholipase domain containing           | Multiple_Complex |
| TC2000009579.hg.1 | 4.02  | 3.59  | 1.34  | 0.0079 | 0.0252 BMP7      | bone morphogenetic protein 7                           | Multiple_Complex |
| TC1100010844.hg.1 | 4.45  | 3.96  | 1.4   | 0.0079 | 0.0252 OR8J3     | olfactory receptor, family 8, subfamily J, member      | Coding           |
| TC0100010039.hg.1 | 4.56  | 4.06  | 1.42  | 0.0079 | 0.0252 LOC101928 | uncharacterized LOC101928034; Salzmann2015             | NonCoding        |
| TC0X00009727.hg.1 | 4.89  | 4.32  | 1.49  | 0.0079 | 0.0252 SPANXN5   | SPANX family, member N5                                | Coding           |
| TC1600008973.hg.1 | 4.64  | 4.97  | -1.25 | 0.0079 | 0.0252 FBXL16    | F-box and leucine-rich repeat protein 16               | Multiple_Complex |
| TC0400008004.hg.1 | 5.52  | 4.8   | 1.64  | 0.0079 | 0.0252 MRPS18C   | mitochondrial ribosomal protein S18C                   | Multiple_Complex |
| TC0100014608.hg.1 | 5.07  | 4.63  | 1.36  | 0.0079 | 0.0253 LRRC53    | leucine rich repeat containing 53                      | Coding           |
| TC1400008780.hg.1 | 4.94  | 4.57  | 1.29  | 0.0079 | 0.0253 NOVA1     | neuro-oncological ventral antigen 1                    | Multiple_Complex |
| TC1200009843.hg.1 | 11.57 | 12.02 | -1.37 | 0.0079 | 0.0253 M6PR      | mannose-6-phosphate receptor (cation dependent)        | Multiple_Complex |
| TC0400007991.hg.1 | 6.56  | 5.69  | 1.84  | 0.0079 | 0.0253 COPS4     | COP9 signalosome subunit 4                             | Multiple_Complex |
| TC0300008539.hg.1 | 6.22  | 6.78  | -1.48 | 0.0079 | 0.0253 SLC15A2   | solute carrier family 15 (oligopeptide transporter)    | Multiple_Complex |
| TC0100006912.hg.1 | 4.75  | 4.3   | 1.36  | 0.0079 | 0.0254 PRAMEF7   | PRAME family member 7; PRAME family member             | Coding           |
| TC1700007702.hg.1 | 5.94  | 6.51  | -1.49 | 0.0079 | 0.0254 SOCS7     | suppressor of cytokine signaling 7                     | Multiple_Complex |
| TC0700009233.hg.1 | 4.87  | 6.03  | -2.24 | 0.0079 | 0.0254 BPGM      | Transcript Identified by AceView, Entrez Gene          | Unassigned       |
| TC0200016717.hg.1 | 6.46  | 6.19  | 1.21  | 0.0079 | 0.0254 TBC1D8    | TBC1 domain family, member 8 (with GRAM domain)        | Multiple_Complex |
| TC0300013151.hg.1 | 6.45  | 7.12  | -1.58 | 0.0079 | 0.0254 NCEH1     | neutral cholesterol ester hydrolase 1                  | Multiple_Complex |
| TC0300009258.hg.1 | 11.31 | 9.02  | 4.87  | 0.008  | 0.0255 MME       | membrane metallo-endopeptidase                         | Multiple_Complex |
| TC0100011920.hg.1 | 6.48  | 5.95  | 1.44  | 0.008  | 0.0255 GALNT2    | polypeptide N-acetylgalactosaminyltransferase          | Multiple_Complex |
| TC0300012118.hg.1 | 8.87  | 9.37  | -1.41 | 0.008  | 0.0255 TMEM39A   | transmembrane protein 39A                              | Multiple_Complex |
| TC0700013629.hg.1 | 9.98  | 10.14 | -1.12 | 0.008  | 0.0255 BRAF      | B-Raf proto-oncogene, serine/threonine kinase          | Multiple_Complex |
| TC0100008336.hg.1 | 11.13 | 10.42 | 1.64  | 0.008  | 0.0255 SCP2      | sterol carrier protein 2                               | Multiple_Complex |
| TC0200013870.hg.1 | 5.18  | 4.79  | 1.31  | 0.008  | 0.0255 LIMS3L    | LIM and senescent cell antigen-like domains 3          | Multiple_Complex |
| TC1900010789.hg.1 | 7.06  | 7.63  | -1.49 | 0.008  | 0.0255 POU2F2    | POU class 2 homeobox 2                                 | Multiple_Complex |
| TC0300013945.hg.1 | 4.79  | 5.54  | -1.68 | 0.008  | 0.0255 METTL6    | methyltransferase like 6                               | Multiple_Complex |
| TC1900012031.hg.1 | 7.25  | 7.64  | -1.31 | 0.008  | 0.0255 ZNF816    | zinc finger protein 816                                | Coding           |
| TC1100012350.hg.1 | 3.6   | 3.24  | 1.28  | 0.008  | 0.0255 DRD2      | dopamine receptor D2                                   | Multiple_Complex |
| TC0300009702.hg.1 | 8.22  | 8.9   | -1.6  | 0.008  | 0.0255 EIF4G1    | eukaryotic translation initiation factor 4 gamma       | Multiple_Complex |
| TC0500007251.hg.1 | 6.16  | 6.56  | -1.31 | 0.008  | 0.0256 FBXO4     | F-box protein 4                                        | Multiple_Complex |
| TC0100011958.hg.1 | 7.59  | 8.43  | -1.8  | 0.008  | 0.0256 GNPAT     | glyceronephosphate O-acyltransferase                   | Multiple_Complex |
| TC0100016122.hg.1 | 6.16  | 6.68  | -1.43 | 0.008  | 0.0256 IGSF8     | immunoglobulin superfamily, member 8                   | Multiple_Complex |

|                      |       |       |       |        |                   |                                                     |                  |
|----------------------|-------|-------|-------|--------|-------------------|-----------------------------------------------------|------------------|
| TC0300011712.hg.1    | 4.63  | 4.15  | 1.39  | 0.008  | 0.0256 POU1F1     | POU class 1 homeobox 1                              | Multiple_Complex |
| TC1700010657.hg.1    | 4.14  | 3.67  | 1.38  | 0.008  | 0.0256 KRTAP4-12  | keratin associated protein 4-12                     | Coding           |
| TSUnmapped00000041.h | 5.15  | 5.57  | -1.34 | 0.008  | 0.0256 ATG16L1    | autophagy related 16-like 1                         | NonCoding        |
| TC1600011318.hg.1    | 5.96  | 5.49  | 1.39  | 0.008  | 0.0256 DECR2      | 2,4-dienoyl-CoA reductase 2, peroxisomal            | Multiple_Complex |
| TC1600011060.hg.1    | 15.4  | 15.81 | -1.32 | 0.008  | 0.0257 COTL1      | coactosin-like F-actin binding protein 1            | Multiple_Complex |
| TC0600009002.hg.1    | 5.83  | 6.37  | -1.45 | 0.008  | 0.0257 C6orf203   | chromosome 6 open reading frame 203                 | Multiple_Complex |
| TC1000011114.hg.1    | 4.25  | 3.89  | 1.29  | 0.0081 | 0.0258 KCNMA1     | potassium channel, calcium activated large co       | Multiple_Complex |
| TC1200008295.hg.1    | 4.46  | 3.93  | 1.44  | 0.0081 | 0.0258 OTOGL      | otogelin-like                                       | Multiple_Complex |
| TC1700006533.hg.1    | 6.11  | 6.54  | -1.35 | 0.0081 | 0.0258 DPH1; OVC  | diphthamide biosynthesis 1; ovarian tumor su        | Multiple_Complex |
| TC1600008173.hg.1    | 3.91  | 3.57  | 1.27  | 0.0081 | 0.0258 TSNAXIP1   | translin-associated factor X interacting proteir    | Multiple_Complex |
| TC1400006484.hg.1    | 4.9   | 4.25  | 1.57  | 0.0081 | 0.0259 OR4Q3      | olfactory receptor, family 4, subfamily Q, men      | Coding           |
| TC0100016789.hg.1    | 5.33  | 5.95  | -1.53 | 0.0081 | 0.0259 GLRX2      | glutaredoxin 2                                      | Multiple_Complex |
| TC0600012551.hg.1    | 6.56  | 7.14  | -1.5  | 0.0081 | 0.0259 MDN1       | midasin AAA ATPase 1                                | Multiple_Complex |
| TC1500009460.hg.1    | 7.88  | 8.27  | -1.31 | 0.0081 | 0.0259 FAM214A    | family with sequence similarity 214, member         | Multiple_Complex |
| TC0900007472.hg.1    | 3.85  | 4.26  | -1.33 | 0.0081 | 0.0259 ANKRD20A   | ankyrin repeat domain 20 family, member A1          | Multiple_Complex |
| TC1000011376.hg.1    | 4.5   | 3.98  | 1.44  | 0.0081 | 0.0259 CH25H      | cholesterol 25-hydroxylase                          | Coding           |
| TC0200016720.hg.1    | 14.57 | 13.53 | 2.06  | 0.0081 | 0.0259 RNF149     | ring finger protein 149                             | Multiple_Complex |
| TC1700010582.hg.1    | 5.49  | 5.74  | -1.19 | 0.0081 | 0.0259 PGAP3      | post-GPI attachment to proteins 3                   | Multiple_Complex |
| TC1300008705.hg.1    | 8.15  | 7.24  | 1.87  | 0.0081 | 0.0259 ELF1       | Transcript Identified by AceView, Entrez Gene       | Unassigned       |
| TC0100006577.hg.1    | 7.65  | 8     | -1.28 | 0.0081 | 0.0259 RER1       | retention in endoplasmic reticulum sorting ret      | Multiple_Complex |
| TC0300009892.hg.1    | 4.27  | 3.84  | 1.35  | 0.0081 | 0.0259 ATP13A5-A  | ATP13A5 antisense RNA 1                             | NonCoding        |
| TC1500007303.hg.1    | 8.37  | 8.93  | -1.48 | 0.0081 | 0.0259 PIGB       | phosphatidylinositol glycan anchor biosynthes       | Multiple_Complex |
| TC0100010066.hg.1    | 9.89  | 10.51 | -1.54 | 0.0081 | 0.0259 UBAP2L     | ubiquitin associated protein 2 like                 | Multiple_Complex |
| TC0900011072.hg.1    | 10.58 | 9.29  | 2.44  | 0.0081 | 0.0259 ABCA1      | ATP binding cassette subfamily A member 1           | Multiple_Complex |
| TC2200009290.hg.1    | 5.47  | 4.82  | 1.56  | 0.0082 | 0.026 FAM19A5     | family with sequence similarity 19 (chemokine       | Multiple_Complex |
| TC1800007440.hg.1    | 5.45  | 6.29  | -1.79 | 0.0082 | 0.026 ZNF532      | zinc finger protein 532                             | Multiple_Complex |
| TC1700012433.hg.1    | 4.67  | 4.39  | 1.21  | 0.0082 | 0.026 HOXB6       | homeobox B6                                         | Multiple_Complex |
| TC2100007342.hg.1    | 7.06  | 7.69  | -1.54 | 0.0082 | 0.026 C21orf33    | chromosome 21 open reading frame 33                 | Multiple_Complex |
| TC1200008544.hg.1    | 6.46  | 7.23  | -1.7  | 0.0082 | 0.026 NEDD1       | neural precursor cell expressed, development        | Multiple_Complex |
| TC2200008831.hg.1    | 4.33  | 4.12  | 1.15  | 0.0082 | 0.026 PMM1        | phosphomannomutase 1                                | Multiple_Complex |
| TC0600009082.hg.1    | 4.76  | 4.13  | 1.55  | 0.0082 | 0.026 C6orf183    | chromosome 6 open reading frame 183                 | Multiple_Complex |
| TC1200008924.hg.1    | 4.09  | 4.53  | -1.36 | 0.0082 | 0.026 DTX1        | deltex 1, E3 ubiquitin ligase                       | Multiple_Complex |
| TC0100011282.hg.1    | 7.67  | 8.1   | -1.35 | 0.0082 | 0.026 SOX13       | SRY box 13                                          | Multiple_Complex |
| TC1600011508.hg.1    | 7.93  | 7.39  | 1.45  | 0.0082 | 0.026 CDR2        | cerebellar degeneration related protein 2           | Multiple_Complex |
| TC0500013298.hg.1    | 4.26  | 4.96  | -1.62 | 0.0082 | 0.0261 C1QTNF3    | C1q and tumor necrosis factor related protein       | Multiple_Complex |
| TC0200008801.hg.1    | 4.96  | 4.55  | 1.33  | 0.0082 | 0.0261 SUL1C4     | sulfotransferase family 1C member 4                 | Multiple_Complex |
| TC0600007687.hg.1    | 5.4   | 6.06  | -1.58 | 0.0082 | 0.0261 RING1      | ring finger protein 1                               | Multiple_Complex |
| TC1900008245.hg.1    | 4.68  | 5.47  | -1.73 | 0.0082 | 0.0261 ZNF221     | zinc finger protein 221                             | Multiple_Complex |
| TC1400007440.hg.1    | 7.19  | 7.89  | -1.62 | 0.0082 | 0.0261 MTHFD1     | methylenetetrahydrofolate dehydrogenase (N          | Multiple_Complex |
| TC1000006975.hg.1    | 5.65  | 6.31  | -1.57 | 0.0082 | 0.0261 MLLT10     | myeloid/lymphoid or mixed-lineage leukemia;         | Multiple_Complex |
| TC0900010063.hg.1    | 7.38  | 6.38  | 2     | 0.0082 | 0.0261 CNTNAP3    | contactin associated protein-like 3                 | Multiple_Complex |
| TC0500007667.hg.1    | 6.55  | 6.08  | 1.39  | 0.0082 | 0.0261 MRPS36     | mitochondrial ribosomal protein S36                 | Multiple_Complex |
| TC0500009856.hg.1    | 7.78  | 8.19  | -1.33 | 0.0082 | 0.0262 CLPTM1L    | CLPTM1-like                                         | Multiple_Complex |
| TC0200010516.hg.1    | 6.06  | 6.7   | -1.56 | 0.0082 | 0.0262 CYP20A1    | cytochrome P450, family 20, subfamily A, poly       | Multiple_Complex |
| TC1900011495.hg.1    | 4.9   | 4.49  | 1.33  | 0.0083 | 0.0262 NLRP11     | NLR family, pyrin domain containing 11              | Coding           |
| TC1800008301.hg.1    | 7.55  | 7.28  | 1.21  | 0.0083 | 0.0262 OSBPL1A    | oxysterol binding protein-like 1A                   | Multiple_Complex |
| TC1200006647.hg.1    | 5.33  | 4.98  | 1.27  | 0.0083 | 0.0262 GNB3       | guanine nucleotide binding protein (G protein       | Multiple_Complex |
| TC0900012272.hg.1    | 9.56  | 10.14 | -1.5  | 0.0083 | 0.0262 RC3H2      | ring finger and CCH-type domains 2                  | Multiple_Complex |
| TC1100007614.hg.1    | 5.1   | 4.43  | 1.59  | 0.0083 | 0.0262 OR5D16     | olfactory receptor, family 5, subfamily D, men      | Coding           |
| TC1700010910.hg.1    | 9.75  | 10.51 | -1.69 | 0.0083 | 0.0262 KANSL1     | KAT8 regulatory NSL complex subunit 1               | Multiple_Complex |
| TC0500008114.hg.1    | 5.41  | 4.91  | 1.42  | 0.0083 | 0.0263 FAM81B     | family with sequence similarity 81, member B        | Multiple_Complex |
| TC0300010903.hg.1    | 8.2   | 7.65  | 1.46  | 0.0083 | 0.0263 KIAA1143   | KIAA1143                                            | Multiple_Complex |
| TC0100015483.hg.1    | 12.54 | 11.74 | 1.73  | 0.0083 | 0.0263 NOTCH2     | notch 2                                             | Multiple_Complex |
| TC1800007506.hg.1    | 4.85  | 4.52  | 1.26  | 0.0083 | 0.0263 TNFRSF11A  | tumor necrosis factor receptor superfamily, m       | Multiple_Complex |
| TC0500008642.hg.1    | 4.89  | 4.4   | 1.4   | 0.0083 | 0.0263 IL13       | interleukin 13                                      | Multiple_Complex |
| TC0300012346.hg.1    | 14.17 | 14.61 | -1.36 | 0.0083 | 0.0263 RPN1       | ribophorin I                                        | Multiple_Complex |
| TC1700012320.hg.1    | 6.21  | 6.43  | -1.16 | 0.0083 | 0.0263 RPH3AL     | rabphilin 3A-like (without C2 domains)              | Multiple_Complex |
| TC0700012228.hg.1    | 5.22  | 4.81  | 1.33  | 0.0083 | 0.0263 LAMB4      | laminin, beta 4                                     | Multiple_Complex |
| TC0600011600.hg.1    | 7.47  | 6.68  | 1.73  | 0.0083 | 0.0264 TAF11      | TAF11 RNA polymerase II, TATA box binding p         | Multiple_Complex |
| TC0100010621.hg.1    | 4.43  | 3.77  | 1.57  | 0.0083 | 0.0264 C1orf105   | chromosome 1 open reading frame 105                 | Multiple_Complex |
| TC1900011305.hg.1    | 6.02  | 6.58  | -1.48 | 0.0083 | 0.0264 ZNF83      | zinc finger protein 83                              | Multiple_Complex |
| TC1400010646.hg.1    | 4.82  | 5.71  | -1.86 | 0.0083 | 0.0264 TCL1B; TCL | T-cell leukemia/lymphoma 1B; T-cell leukemia        | Multiple_Complex |
| TC0700010392.hg.1    | 5.4   | 4.89  | 1.42  | 0.0083 | 0.0264 FERD3L     | Fer3-like bHLH transcription factor                 | Coding           |
| TC1100011558.hg.1    | 4.33  | 3.82  | 1.42  | 0.0084 | 0.0264 PDE2A      | phosphodiesterase 2A, cGMP-stimulated               | Multiple_Complex |
| TC0200007536.hg.1    | 4.24  | 3.92  | 1.25  | 0.0084 | 0.0264 GTF2A1L; S | general transcription factor IIA 1-like; STON1-     | Multiple_Complex |
| TC1900006964.hg.1    | 3.72  | 3.35  | 1.3   | 0.0084 | 0.0264 RDH8       | retinol dehydrogenase 8 (all-trans)                 | Multiple_Complex |
| TC0200014332.hg.1    | 4.18  | 3.88  | 1.23  | 0.0084 | 0.0264 C2orf27B   | chromosome 2 open reading frame 27B                 | Multiple_Complex |
| TC0X00007999.hg.1    | 5.25  | 4.81  | 1.36  | 0.0084 | 0.0264 BEX4       | brain expressed X-linked 4                          | Multiple_Complex |
| TC1300009954.hg.1    | 9.7   | 8.9   | 1.74  | 0.0084 | 0.0265 DNAJC15    | DnaJ (Hsp40) homolog, subfamily C, member           | Multiple_Complex |
| TC0300009686.hg.1    | 5.29  | 4.81  | 1.39  | 0.0084 | 0.0265 HTR3C      | 5-hydroxytryptamine (serotonin) receptor 3C, Coding | Coding           |

|                      |       |       |       |        |                              |                                                  |                  |
|----------------------|-------|-------|-------|--------|------------------------------|--------------------------------------------------|------------------|
| TC0900007976.hg.1    | 6.7   | 7.28  | -1.49 | 0.0084 | 0.0266 SUSD3                 | sushi domain containing 3                        | Coding           |
| TC0600009240.hg.1    | 8.6   | 7.76  | 1.78  | 0.0084 | 0.0266 KPNA5                 | karyopherin alpha 5 (importin alpha 6)           | Multiple_Complex |
| TC0Y00006909.hg.1    | 4.56  | 4.2   | 1.28  | 0.0084 | 0.0267 SRY                   | sex determining region Y                         | Coding           |
| TC0600007307.hg.1    | 9.01  | 9.63  | -1.54 | 0.0084 | 0.0267 BTN2A1                | butyrophilin, subfamily 2, member A1             | Multiple_Complex |
| TC1900011153.hg.1    | 6.27  | 6.98  | -1.63 | 0.0085 | 0.0267 RRAS                  | related RAS viral (r-ras) oncogene homolog       | Multiple_Complex |
| TC1500006562.hg.1    | 4.46  | 4.01  | 1.37  | 0.0085 | 0.0267 NPAP1                 | nuclear pore associated protein 1                | Coding           |
| TC0700010908.hg.1    | 4.42  | 4.52  | -1.07 | 0.0085 | 0.0267 POLM; MIR             | polymerase (DNA directed), mu; microRNA 68       | Multiple_Complex |
| TC1900008012.hg.1    | 5.45  | 6.16  | -1.64 | 0.0085 | 0.0267 CATSPERG              | catsper channel auxiliary subunit gamma          | Multiple_Complex |
| TC1600011058.hg.1    | 6.06  | 6.57  | -1.42 | 0.0085 | 0.0267 TLDC1                 | TBC/LysM-associated domain containing 1          | Multiple_Complex |
| TC1700012324.hg.1    | 7.05  | 7.66  | -1.53 | 0.0085 | 0.0267 ABR                   | active BCR-related                               | Multiple_Complex |
| TC1900011723.hg.1    | 5.12  | 5.79  | -1.59 | 0.0085 | 0.0268 ZNF793                | zinc finger protein 793                          | Multiple_Complex |
| TC0500009490.hg.1    | 5.42  | 5.09  | 1.25  | 0.0085 | 0.0268 BNIP1                 | BCL2/adenovirus E1B 19kDa interacting prote      | Coding           |
| TSUnmapped00000823.h | 5.91  | 5.6   | 1.23  | 0.0085 | 0.0268 DUX1                  | double homeobox 1                                | Coding           |
| TC1700007971.hg.1    | 4.86  | 5.23  | -1.29 | 0.0085 | 0.0268 FAM215A               | family with sequence similarity 215, member      | Multiple_Complex |
| TC0100006624.hg.1    | 4.85  | 5.13  | -1.22 | 0.0085 | 0.0269 SMIM1                 | small integral membrane protein 1 (Vel blood     | Multiple_Complex |
| TC1100009745.hg.1    | 9.92  | 9.45  | 1.38  | 0.0085 | 0.0269 KRTAP5-1              | keratin associated protein 5-1                   | Coding           |
| TC0800009418.hg.1    | 4.75  | 5.29  | -1.45 | 0.0085 | 0.0269 ANGPT2                | angiopoietin 2                                   | Multiple_Complex |
| TC0900007318.hg.1    | 7.77  | 7.39  | 1.3   | 0.0085 | 0.0269 SPATA31A; SPATA31     | SPATA31 subfamily A, member 7; SPATA31 su        | Multiple_Complex |
| TC0100015572.hg.1    | 8.81  | 9.34  | -1.44 | 0.0086 | 0.027 SRGAP2B                | SLIT-ROBO Rho GTPase activating protein 2B       | Multiple_Complex |
| TC0900008763.hg.1    | 7.64  | 7.13  | 1.42  | 0.0086 | 0.027 PBX3                   | pre-B-cell leukemia homeobox 3                   | Multiple_Complex |
| TC0200016347.hg.1    | 12.25 | 12.78 | -1.45 | 0.0086 | 0.027 HDLBP                  | high density lipoprotein binding protein         | Multiple_Complex |
| TC0200011690.hg.1    | 11.43 | 12.02 | -1.51 | 0.0086 | 0.0271 YWHAQ                 | tyrosine 3-monooxygenase/tryptophan 5-mor        | Multiple_Complex |
| TSUnmapped00000276.h | 3.59  | 3.92  | -1.26 | 0.0086 | 0.0271 VPS11                 | VPS11, CORVET/HOPS core subunit [Source:H        | Coding           |
| TC0700013391.hg.1    | 6.91  | 7.39  | -1.4  | 0.0086 | 0.0271 NSUN5P1               | NOP2/Sun domain family, member 5 pseudog         | Multiple_Complex |
| TC1200009065.hg.1    | 6.69  | 6.92  | -1.17 | 0.0086 | 0.0271 RFC5                  | replication factor C subunit 5                   | Multiple_Complex |
| TC1400006828.hg.1    | 5.03  | 4.67  | 1.29  | 0.0086 | 0.0271 COCH                  | cochlin                                          | Multiple_Complex |
| TC0600012752.hg.1    | 4.49  | 4.81  | -1.25 | 0.0086 | 0.0271 PDSS2                 | prenyl (decaprenyl) diphosphate synthase, sul    | Multiple_Complex |
| TC1400008406.hg.1    | 4.75  | 5.15  | -1.32 | 0.0086 | 0.0271 TRMT61A               | tRNA methyltransferase 61A                       | Multiple_Complex |
| TC0300011107.hg.1    | 7.39  | 6.77  | 1.54  | 0.0086 | 0.0272 ZMYND10               | zinc finger, MYND-type containing 10             | Multiple_Complex |
| TC0400009330.hg.1    | 7.55  | 6.81  | 1.67  | 0.0086 | 0.0272 SAP30                 | Sin3A associated protein 30kDa                   | Multiple_Complex |
| TC0100013896.hg.1    | 5.65  | 5.26  | 1.31  | 0.0086 | 0.0272 CLDN19                | claudin 19                                       | Coding           |
| TC0X00009107.hg.1    | 5.23  | 5.67  | -1.36 | 0.0086 | 0.0272 GEMIN8                | gem nuclear organelle associated protein 8       | Multiple_Complex |
| TC0600012764.hg.1    | 10.78 | 10.01 | 1.71  | 0.0087 | 0.0272 SEC63                 | SEC63 homolog, protein translocation regulat     | Multiple_Complex |
| TC1900006700.hg.1    | 7.77  | 8.27  | -1.42 | 0.0087 | 0.0272 HDGFRP2               | hepatoma-derived growth factor-related prot      | Multiple_Complex |
| TC0600012556.hg.1    | 6.58  | 7.36  | -1.72 | 0.0087 | 0.0272 BACH2                 | Transcript Identified by AceView, Entrez Gene    | Unassigned       |
| TC0900010586.hg.1    | 5.6   | 6.21  | -1.53 | 0.0087 | 0.0272 C9orf64               | chromosome 9 open reading frame 64               | Multiple_Complex |
| TC0200016606.hg.1    | 6.31  | 6.64  | -1.26 | 0.0087 | 0.0273 SCLY                  | selenocysteine lyase                             | Multiple_Complex |
| TC0100007240.hg.1    | 5.65  | 6.05  | -1.32 | 0.0087 | 0.0273 NBPF3                 | neuroblastoma breakpoint family, member 3        | Multiple_Complex |
| TC1000010768.hg.1    | 5.2   | 4.69  | 1.43  | 0.0087 | 0.0273 EGR2                  | early growth response 2                          | Multiple_Complex |
| TC0100013057.hg.1    | 6.54  | 6.81  | -1.2  | 0.0087 | 0.0273 FAM231A; Homo sapiens | family with sequence similarity                  | Coding           |
| TC1700006784.hg.1    | 8.1   | 7.72  | 1.3   | 0.0087 | 0.0273 GUCY2D                | guanylate cyclase 2D, membrane (retina-speci     | Multiple_Complex |
| TC0900010907.hg.1    | 4.75  | 4.27  | 1.4   | 0.0087 | 0.0273 HSD17B3               | hydroxysteroid (17-beta) dehydrogenase 3         | Multiple_Complex |
| TC1600008220.hg.1    | 7.63  | 8.56  | -1.89 | 0.0087 | 0.0273 UTP4                  | UTP4 small subunit (SSU) processome compo        | Multiple_Complex |
| TSUnmapped00000294.h | 4.67  | 4.33  | 1.26  | 0.0087 | 0.0273 VPS11                 | VPS11, CORVET/HOPS core subunit [Source:H        | NonCoding        |
| TC0700013468.hg.1    | 6.45  | 5.79  | 1.58  | 0.0087 | 0.0274 NDUFB2                | NADH dehydrogenase (ubiquinone) 1 beta sub       | Multiple_Complex |
| TC1100007884.hg.1    | 10.3  | 9.92  | 1.3   | 0.0087 | 0.0274 SLC3A2                | solute carrier family 3 (amino acid transporter  | Multiple_Complex |
| TSUnmapped00000358.h | 4.7   | 5.23  | -1.44 | 0.0087 | 0.0274 ZNF197                | zinc finger protein 197                          | Coding           |
| TC1100010552.hg.1    | 3.93  | 3.48  | 1.37  | 0.0087 | 0.0274 RAG2                  | recombination activating gene 2                  | Multiple_Complex |
| TC1000008539.hg.1    | 4.37  | 3.83  | 1.45  | 0.0087 | 0.0275 DNTT                  | DNA nucleotidyltransferase                       | Multiple_Complex |
| TC1900012010.hg.1    | 5.43  | 5.08  | 1.27  | 0.0088 | 0.0275 SHANK1                | SH3 and multiple ankyrin repeat domains 1        | Multiple_Complex |
| TC0900009074.hg.1    | 6.53  | 6.94  | -1.33 | 0.0088 | 0.0275 SURF2                 | surfeit 2                                        | Multiple_Complex |
| TC0100016068.hg.1    | 6.03  | 5.69  | 1.26  | 0.0088 | 0.0275 OR10K2                | olfactory receptor, family 10, subfamily K, me   | Coding           |
| TC0400012781.hg.1    | 6.42  | 6.78  | -1.28 | 0.0088 | 0.0275 STIM2                 | stromal interaction molecule 2                   | NonCoding        |
| TC1200012543.hg.1    | 6.69  | 7.12  | -1.35 | 0.0088 | 0.0275 ANKLE2                | ankyrin repeat and LEM domain containing 2       | Multiple_Complex |
| TC0X00006977.hg.1    | 8.35  | 7.74  | 1.52  | 0.0088 | 0.0275 MID1IP1               | MID1 interacting protein 1                       | Coding           |
| TC0100009149.hg.1    | 8.5   | 7.7   | 1.74  | 0.0088 | 0.0275 PTBP2                 | Transcript Identified by AceView, Entrez Gene    | Unassigned       |
| TC0600008127.hg.1    | 6.21  | 6.88  | -1.59 | 0.0088 | 0.0276 SLC29A1               | solute carrier family 29 (equilibrative nucleosi | Multiple_Complex |
| TC0900009706.hg.1    | 5.83  | 5.39  | 1.36  | 0.0088 | 0.0276 IFNA13                | interferon, alpha 13                             | Coding           |
| TC0400011175.hg.1    | 4.75  | 4.3   | 1.37  | 0.0088 | 0.0276 TMEM150C              | transmembrane protein 150C                       | Multiple_Complex |
| TC0300010388.hg.1    | 6.86  | 7.6   | -1.66 | 0.0088 | 0.0276 MRPS25                | mitochondrial ribosomal protein S25              | Multiple_Complex |
| TC1400006821.hg.1    | 5.87  | 6.53  | -1.58 | 0.0088 | 0.0276 G2E3                  | G2/M-phase specific E3 ubiquitin protein ligas   | Multiple_Complex |
| TC1900008924.hg.1    | 7.59  | 8.07  | -1.39 | 0.0088 | 0.0276 U2AF2                 | U2 small nuclear RNA auxiliary factor 2          | Multiple_Complex |
| TC1300008827.hg.1    | 5.12  | 4.4   | 1.64  | 0.0088 | 0.0276 ERICH6B               | glutamate rich 6B                                | Multiple_Complex |
| TC0800009113.hg.1    | 10.32 | 9.88  | 1.36  | 0.0088 | 0.0277 PTP4A3                | protein tyrosine phosphatase type IVA, memb      | Multiple_Complex |
| TC1700009430.hg.1    | 7.57  | 7.99  | -1.34 | 0.0088 | 0.0277 TSR1                  | TSR1, 20S rRNA accumulation, homolog (S. cei     | Multiple_Complex |
| TC1200011471.hg.1    | 6.76  | 7.28  | -1.44 | 0.0088 | 0.0277 POC1B; POC1           | centriolar protein B; POC1B-GALNT4 rea           | Multiple_Complex |
| TC0600009234.hg.1    | 4.97  | 4.42  | 1.46  | 0.0088 | 0.0277 FAM26E                | family with sequence similarity 26, member E     | Coding           |
| TC0300009412.hg.1    | 4.85  | 4.48  | 1.29  | 0.0089 | 0.0278 SERPINI1              | serpin peptidase inhibitor, clade I (neuroserpi  | Multiple_Complex |
| TC0200013351.hg.1    | 8.86  | 7.76  | 2.14  | 0.0089 | 0.0278 RGPDI; RG             | RANBP2-like and GRIP domain containing 1; R      | Multiple_Complex |
| TC1400010049.hg.1    | 3.86  | 3.48  | 1.31  | 0.0089 | 0.0278 SERPINA12             | serpin peptidase inhibitor, clade A (alpha-1 an  | Coding           |

|                      |       |       |       |        |                   |                                                   |                  |
|----------------------|-------|-------|-------|--------|-------------------|---------------------------------------------------|------------------|
| TC1000012086.hg.1    | 4.2   | 3.59  | 1.53  | 0.0089 | 0.0278 C10orf120  | chromosome 10 open reading frame 120              | Coding           |
| TC1400006495.hg.1    | 4.22  | 3.87  | 1.27  | 0.0089 | 0.0278 OR4Q2      | olfactory receptor, family 4, subfamily Q, men    | Pseudogene       |
| TC1100013201.hg.1    | 5.41  | 5.88  | -1.38 | 0.0089 | 0.0279 ORAOV1     | oral cancer overexpressed 1                       | NonCoding        |
| TSUnmapped00000359.h | 7.71  | 8.18  | -1.39 | 0.0089 | 0.0279 SLC2A6     | solute carrier family 2 (facilitated glucose tran | Coding           |
| TC0X00008833.hg.1    | 7.38  | 6.88  | 1.41  | 0.0089 | 0.0279 FAM50A     | family with sequence similarity 50, member A      | Multiple_Complex |
| TC1100008524.hg.1    | 5.12  | 4.71  | 1.33  | 0.0089 | 0.0279 OMP        | olfactory marker protein                          | Coding           |
| TSUnmapped00000147.h | 5.36  | 5.97  | -1.52 | 0.0089 | 0.0279 ATG16L1    | autophagy related 16-like 1                       | Coding           |
| TC0100018166.hg.1    | 7.31  | 7.83  | -1.44 | 0.0089 | 0.028 CLCN6       | chloride channel, voltage-sensitive 6             | Multiple_Complex |
| TC0200011287.hg.1    | 5.09  | 5.57  | -1.4  | 0.0089 | 0.028 ASB1        | ankyrin repeat and SOCS box containing 1          | Multiple_Complex |
| TC1200010182.hg.1    | 5.47  | 6.16  | -1.62 | 0.009  | 0.028 BHLHE41     | basic helix-loop-helix family, member e41         | Multiple_Complex |
| TC1100012020.hg.1    | 5     | 5.89  | -1.86 | 0.009  | 0.028 SESN3       | Transcript Identified by AceView, Entrez Gene     | Unassigned       |
| TC0100015332.hg.1    | 9.66  | 9.21  | 1.36  | 0.009  | 0.0281 RSBN1      | round spermatid basic protein 1                   | Multiple_Complex |
| TC2000009253.hg.1    | 5.34  | 5.82  | -1.39 | 0.009  | 0.0281 ZNF335     | zinc finger protein 335                           | Multiple_Complex |
| TC1000007761.hg.1    | 10.49 | 11.42 | -1.91 | 0.009  | 0.0282 ARID5B     | AT rich interactive domain 5B (MRF1-like)         | Multiple_Complex |
| TC1900007502.hg.1    | 6.06  | 6.97  | -1.88 | 0.0091 | 0.0283 ZNF85      | zinc finger protein 85                            | Multiple_Complex |
| TC0500012526.hg.1    | 3.21  | 2.98  | 1.17  | 0.0091 | 0.0283 GLRA1      | glycine receptor alpha 1                          | Multiple_Complex |
| TC0600010991.hg.1    | 9.95  | 10.45 | -1.42 | 0.0091 | 0.0283 MBOAT1     | membrane bound O-acyltransferase domain c         | Multiple_Complex |
| TC0100016052.hg.1    | 7.19  | 8.16  | -1.96 | 0.0091 | 0.0283 FCRL1      | Fc receptor-like 1                                | Multiple_Complex |
| TC0300012771.hg.1    | 4.94  | 4.41  | 1.44  | 0.0091 | 0.0283 TM4SF18    | Transcript Identified by AceView, Entrez Gene     | Unassigned       |
| TC0200016751.hg.1    | 4.39  | 4.78  | -1.31 | 0.0091 | 0.0283 LOC10013C  | uncharacterized LOC100130691; Transcript Id       | NonCoding        |
| TC0700013060.hg.1    | 6.37  | 6.89  | -1.43 | 0.0091 | 0.0284 TMUB1      | transmembrane and ubiquitin-like domain cor       | Multiple_Complex |
| TC0600007986.hg.1    | 4.46  | 4.88  | -1.34 | 0.0091 | 0.0284 APOBEC2    | apolipoprotein B mRNA editing enzyme, catal       | Coding           |
| TC0X00009656.hg.1    | 9.5   | 8.36  | 2.2   | 0.0091 | 0.0284 FCGR1B     | Fc fragment of IgG, high affinity lb, receptor (C | Multiple_Complex |
| TC1700008350.hg.1    | 5.17  | 5.84  | -1.59 | 0.0091 | 0.0284 NOG        | noggin                                            | Coding           |
| TC1700011905.hg.1    | 6.16  | 5.72  | 1.36  | 0.0091 | 0.0284 DNAH17     | dynein, axonemal, heavy chain 17                  | Multiple_Complex |
| TC0400009791.hg.1    | 6.46  | 6.98  | -1.44 | 0.0091 | 0.0284 NOP14      | NOP14 nucleolar protein                           | Multiple_Complex |
| TC1900011113.hg.1    | 8.35  | 9.09  | -1.67 | 0.0091 | 0.0285 GYS1       | glycogen synthase 1 (muscle)                      | Multiple_Complex |
| TC0X00011245.hg.1    | 4.82  | 4.32  | 1.41  | 0.0091 | 0.0285 H2AFB3     | H2A histone family, member B3                     | Coding           |
| TC0400011616.hg.1    | 7.7   | 7.1   | 1.51  | 0.0092 | 0.0286 TIFA       | TRAF-interacting protein with forkhead-associ     | Coding           |
| TC1100007868.hg.1    | 4.57  | 4.39  | 1.13  | 0.0092 | 0.0286 GNG3       | guanine nucleotide binding protein (G protein     | Multiple_Complex |
| TC0400007276.hg.1    | 9.82  | 8.84  | 1.97  | 0.0092 | 0.0286 KLHL5      | kelch-like family member 5                        | Multiple_Complex |
| TSUnmapped00000127.h | 4.74  | 4.02  | 1.65  | 0.0092 | 0.0287 KIF15      | kinesin family member 15                          | Coding           |
| TC0100013809.hg.1    | 7.57  | 7.98  | -1.33 | 0.0092 | 0.0287 TRIT1      | tRNA isopentenyltransferase 1                     | Multiple_Complex |
| TC1100010391.hg.1    | 3.78  | 3.43  | 1.28  | 0.0092 | 0.0287 MUC15      | mucin 15, cell surface associated                 | Coding           |
| TSUnmapped00000530.h | 4.86  | 5.41  | -1.46 | 0.0092 | 0.0287 ATG16L1    | autophagy related 16-like 1                       | Coding           |
| TC0200012035.hg.1    | 5.69  | 5.18  | 1.43  | 0.0092 | 0.0287 ADGRF3     | adhesion G protein-coupled receptor F3            | Multiple_Complex |
| TC1500010838.hg.1    | 5.02  | 5.29  | -1.21 | 0.0092 | 0.0288 GOLGA8M    | golgin A8 family, member M                        | Multiple_Complex |
| TC1300006979.hg.1    | 8.69  | 9.69  | -2    | 0.0092 | 0.0288 RGCC       | regulator of cell cycle                           | Multiple_Complex |
| TC0800011974.hg.1    | 6.21  | 6.88  | -1.59 | 0.0093 | 0.0288 TRAPPC9    | trafficking protein particle complex 9            | Multiple_Complex |
| TC1000008744.hg.1    | 8.57  | 9.34  | -1.71 | 0.0093 | 0.0288 TRIM8      | tripartite motif containing 8                     | Multiple_Complex |
| TC1200011843.hg.1    | 7.03  | 7.51  | -1.39 | 0.0093 | 0.0288 SART3      | squamous cell carcinoma antigen recognized i      | Multiple_Complex |
| TC0100014685.hg.1    | 4.86  | 4.33  | 1.45  | 0.0093 | 0.0289 ADGRL4     | adhesion G protein-coupled receptor L4            | Coding           |
| TC2200007313.hg.1    | 8.98  | 9.87  | -1.86 | 0.0093 | 0.0289 TRIOBP; NC | TRIO and F-actin binding protein; nucleolar pr    | Multiple_Complex |
| TC0600011732.hg.1    | 6.24  | 6.68  | -1.35 | 0.0093 | 0.0289 SAYSD1     | SAYSVFN motif domain containing 1                 | Multiple_Complex |
| TC2000009624.hg.1    | 5.09  | 4.73  | 1.29  | 0.0093 | 0.0289 APCDD1L    | adenomatosis polyposis coli down-regulated 1      | Multiple_Complex |
| TC2200007909.hg.1    | 4.62  | 5.1   | -1.4  | 0.0093 | 0.0289 MICAL3     | microtubule associated monooxygenase, calpr       | Multiple_Complex |
| TC0200010410.hg.1    | 7.52  | 9.87  | -5.1  | 0.0093 | 0.029 SPATS2L     | spermatogenesis associated, serine-rich 2-like    | Multiple_Complex |
| TC1400007308.hg.1    | 5.22  | 4.88  | 1.27  | 0.0093 | 0.029 TOMM20L     | translocase of outer mitochondrial membrane       | Coding           |
| TC1400010756.hg.1    | 5.57  | 6.2   | -1.54 | 0.0094 | 0.0291 GPR135     | G protein-coupled receptor 135                    | Multiple_Complex |
| TC0700009410.hg.1    | 4.38  | 3.75  | 1.55  | 0.0094 | 0.0291 OR9A4      | olfactory receptor, family 9, subfamily A, men    | Coding           |
| TC0400008861.hg.1    | 5.18  | 5.94  | -1.69 | 0.0094 | 0.0291 IL15       | interleukin 15                                    | Multiple_Complex |
| TC0500013197.hg.1    | 4.82  | 4.36  | 1.38  | 0.0094 | 0.0292 ATP6AP1L   | ATPase, H+ transporting, lysosomal accessory      | NonCoding        |
| TC0300014093.hg.1    | 9.94  | 9.36  | 1.5   | 0.0094 | 0.0293 PCYT1A     | phosphate cytidyltransferase 1, choline, alpt     | Multiple_Complex |
| TC0900009702.hg.1    | 4.66  | 4.23  | 1.34  | 0.0094 | 0.0293 IFNA5      | interferon, alpha 5                               | Coding           |
| TC1500008015.hg.1    | 4.74  | 3.99  | 1.69  | 0.0094 | 0.0293 ST20-AS1   | ST20 antisense RNA 1                              | Multiple_Complex |
| TC2200007477.hg.1    | 8.8   | 9.68  | -1.84 | 0.0094 | 0.0293 ACO2       | aconitase 2, mitochondrial                        | Multiple_Complex |
| TC1900011271.hg.1    | 19.19 | 18.77 | 1.34  | 0.0095 | 0.0293 FPR1       | formyl peptide receptor 1                         | Coding           |
| TC1300008938.hg.1    | 9.67  | 10.43 | -1.69 | 0.0095 | 0.0293 DLEU2; MII | deleted in lymphocytic leukemia 2 (non-prote      | Multiple_Complex |
| TC0300011135.hg.1    | 6.4   | 7     | -1.52 | 0.0095 | 0.0294 VPRBP      | Vpr (HIV-1) binding protein                       | Multiple_Complex |
| TC1200011225.hg.1    | 3.58  | 3.32  | 1.2   | 0.0095 | 0.0294 BEST3      | bestrophin 3                                      | Multiple_Complex |
| TC0700010139.hg.1    | 3.66  | 3.32  | 1.27  | 0.0095 | 0.0295 PAPOLB     | poly(A) polymerase beta                           | Coding           |
| TC0200009331.hg.1    | 4.34  | 4     | 1.27  | 0.0095 | 0.0295 POTE       | POTE ankyrin domain family, member E              | Coding           |
| TC2000010031.hg.1    | 7.39  | 8.01  | -1.54 | 0.0095 | 0.0295 TAF4       | TAF4 RNA polymerase II, TATA box binding pr       | Multiple_Complex |
| TC0100013713.hg.1    | 10.52 | 9.84  | 1.61  | 0.0095 | 0.0295 STK40      | serine/threonine kinase 40                        | Multiple_Complex |
| TC0400009379.hg.1    | 11.91 | 12.52 | -1.53 | 0.0095 | 0.0296 SPCS3      | signal peptidase complex subunit 3                | Multiple_Complex |
| TC1900008020.hg.1    | 12.02 | 12.99 | -1.95 | 0.0095 | 0.0296 ACTN4      | actinin, alpha 4                                  | Multiple_Complex |
| TC1200009980.hg.1    | 4.47  | 5     | -1.45 | 0.0096 | 0.0296 GPRC5D     | G protein-coupled receptor, class C, group 5, r   | Coding           |
| TC1200010149.hg.1    | 5.3   | 4.71  | 1.5   | 0.0096 | 0.0296 C12orf77   | chromosome 12 open reading frame 77               | Multiple_Complex |
| TC0100009394.hg.1    | 17.78 | 17.32 | 1.38  | 0.0096 | 0.0297 CD53       | CD53 molecule                                     | Multiple_Complex |
| TC2000009646.hg.1    | 12.09 | 11.52 | 1.48  | 0.0096 | 0.0297 CTSZ       | cathepsin Z                                       | Multiple_Complex |

|                      |       |       |       |        |        |           |                                                    |                  |
|----------------------|-------|-------|-------|--------|--------|-----------|----------------------------------------------------|------------------|
| TC1400006915.hg.1    | 4.87  | 4.45  | 1.34  | 0.0096 | 0.0297 | BRMS1L    | Transcript Identified by AceView, Entrez Gene      | Unassigned       |
| TSUnmapped00000061.h | 10.44 | 10.95 | -1.42 | 0.0096 | 0.0297 | FBL       | fibrillarlin                                       | Coding           |
| TC1000012399.hg.1    | 6.49  | 6.98  | -1.41 | 0.0096 | 0.0297 | ECHS1     | enoyl-CoA hydratase, short chain, 1, mitochondr    | Multiple_Complex |
| TC0100014776.hg.1    | 5.68  | 5.26  | 1.34  | 0.0096 | 0.0297 | DDAH1     | dimethylarginine dimethylaminohydrolase 1          | Multiple_Complex |
| TC1200012749.hg.1    | 8.33  | 7.69  | 1.55  | 0.0096 | 0.0297 | CD163     | CD163 molecule                                     | Multiple_Complex |
| TC1600011425.hg.1    | 7.17  | 6.91  | 1.2   | 0.0096 | 0.0297 | DDX19A    | DEAD (Asp-Glu-Ala-Asp) box polypeptide 19A         | Multiple_Complex |
| TC1700009590.hg.1    | 4.9   | 5.43  | -1.44 | 0.0096 | 0.0297 | KIAA0753  | KIAA0753                                           | Multiple_Complex |
| TC1700007372.hg.1    | 5.97  | 5.54  | 1.35  | 0.0096 | 0.0297 | FOXN1     | forkhead box N1                                    | Multiple_Complex |
| TC1100006973.hg.1    | 4.82  | 4.37  | 1.37  | 0.0096 | 0.0297 | OTOG      | otogelin                                           | Multiple_Complex |
| TC2200009336.hg.1    | 5.35  | 5.77  | -1.34 | 0.0096 | 0.0297 | NIPSNAP1  | nipsnap homolog 1 (C. elegans)                     | Multiple_Complex |
| TC1900009576.hg.1    | 6.52  | 7.09  | -1.49 | 0.0096 | 0.0297 | ZNF699    | zinc finger protein 699                            | Multiple_Complex |
| TC0500013089.hg.1    | 4.77  | 4.48  | 1.22  | 0.0096 | 0.0298 | GFPT2     | glutamine-fructose-6-phosphate transaminase        | Multiple_Complex |
| TC0300013980.hg.1    | 4.02  | 4.3   | -1.22 | 0.0096 | 0.0298 | GMPPB     | GDP-mannose pyrophosphorylase B                    | Multiple_Complex |
| TC0800009967.hg.1    | 4.29  | 4.81  | -1.44 | 0.0096 | 0.0298 | NUGGC     | nuclear GTPase, germinal center associated         | Coding           |
| TC0200010046.hg.1    | 5.33  | 4.82  | 1.43  | 0.0096 | 0.0298 | HOXD12    | homeobox D12                                       | Coding           |
| TC0300012109.hg.1    | 5.5   | 5.06  | 1.36  | 0.0096 | 0.0298 | IGSF11    | immunoglobulin superfamily, member 11              | Multiple_Complex |
| TC0900007351.hg.1    | 6.37  | 5.87  | 1.42  | 0.0096 | 0.0298 | LINC01189 | long intergenic non-protein coding RNA 1189        | NonCoding        |
| TSUnmapped00000397.h | 7.88  | 8.64  | -1.69 | 0.0096 | 0.0298 | EIF3F     | Eukaryotic translation initiation factor 3 subunit | Coding           |
| TC0100018416.hg.1    | 4.18  | 3.77  | 1.33  | 0.0097 | 0.0298 | TAS1R2    | taste receptor, type 1, member 2                   | Coding           |
| TC2200008828.hg.1    | 8.11  | 7.58  | 1.45  | 0.0097 | 0.0299 | PHF5A     | PHD finger protein 5A                              | Multiple_Complex |
| TC0900008675.hg.1    | 5.08  | 4.51  | 1.49  | 0.0097 | 0.0299 | OR116     | olfactory receptor, family 1, subfamily L, mem     | Coding           |
| TC0200007035.hg.1    | 5.75  | 6.18  | -1.36 | 0.0097 | 0.0299 | EPT1      | ethanolaminephosphotransferase 1                   | Multiple_Complex |
| TC1700011436.hg.1    | 9.76  | 9.24  | 1.44  | 0.0097 | 0.03   | ERN1      | endoplasmic reticulum to nucleus signaling 1       | Multiple_Complex |
| TC0300008558.hg.1    | 10.29 | 11.52 | -2.34 | 0.0097 | 0.03   | DTX3L     | deltex 3 like, E3 ubiquitin ligase                 | Multiple_Complex |
| TC1200012653.hg.1    | 7.9   | 7.5   | 1.31  | 0.0098 | 0.0301 | METTL21B  | methyltransferase like 21B                         | Multiple_Complex |
| TC2100007072.hg.1    | 9.25  | 9.99  | -1.67 | 0.0098 | 0.0301 | TTC3      | tetratricopeptide repeat domain 3                  | Multiple_Complex |
| TC2000007633.hg.1    | 7.79  | 7.36  | 1.35  | 0.0098 | 0.0301 | DDX27     | DEAD (Asp-Glu-Ala-Asp) box polypeptide 27          | Multiple_Complex |
| TC1000009851.hg.1    | 4.78  | 5.4   | -1.53 | 0.0098 | 0.0301 | FRMD4A    | FERM domain containing 4A                          | Multiple_Complex |
| TC1700008328.hg.1    | 5.11  | 5.69  | -1.49 | 0.0098 | 0.0303 | STXBP4    | syntaxin binding protein 4                         | Multiple_Complex |
| TC1300006633.hg.1    | 9.31  | 9.66  | -1.27 | 0.0098 | 0.0303 | PABPC3    | poly(A) binding protein, cytoplasmic 3             | Coding           |
| TC1500007883.hg.1    | 5.4   | 5.85  | -1.37 | 0.0098 | 0.0303 | COMMD4    | COMM domain containing 4                           | Multiple_Complex |
| TC1000009527.hg.1    | 6.81  | 7.5   | -1.61 | 0.0098 | 0.0303 | LARP4B    | La ribonucleoprotein domain family, member         | Multiple_Complex |
| TC0X00006839.hg.1    | 4.19  | 3.76  | 1.34  | 0.0099 | 0.0304 | MAGEB6    | MAGE family member B6                              | Coding           |
| TC1700012184.hg.1    | 4.51  | 4.11  | 1.32  | 0.0099 | 0.0304 | CHRN1     | cholinergic receptor, nicotinic beta 1             | Multiple_Complex |
| TC1100011202.hg.1    | 6.36  | 6.01  | 1.27  | 0.0099 | 0.0304 | TMEM262   | transmembrane protein 262                          | Multiple_Complex |
| TC2200007963.hg.1    | 8.33  | 8.92  | -1.5  | 0.0099 | 0.0304 | DGCR2; DG | DiGeorge syndrome critical region gene 2; DiG      | Multiple_Complex |
| TC1500009998.hg.1    | 6.7   | 6.41  | 1.22  | 0.0099 | 0.0305 | GOLGA6A   | golgin A6 family, member A                         | Multiple_Complex |
| TC0300013420.hg.1    | 7.93  | 8.91  | -1.96 | 0.0099 | 0.0305 | IGF2BP2   | insulin-like growth factor 2 mRNA binding pro      | Multiple_Complex |
| TC1200007844.hg.1    | 4.93  | 5.71  | -1.72 | 0.0099 | 0.0305 | RBMS2     | RNA binding motif, single stranded interacting     | Multiple_Complex |
| TC1500006818.hg.1    | 9.05  | 9.45  | -1.32 | 0.0099 | 0.0305 | EMC4      | ER membrane protein complex subunit 4              | Multiple_Complex |
| TC1600011225.hg.1    | 8.73  | 8.34  | 1.31  | 0.0099 | 0.0306 | RNF166    | ring finger protein 166                            | Multiple_Complex |
| TC0600013280.hg.1    | 9.51  | 9.76  | -1.19 | 0.0099 | 0.0306 | MAP3K5    | mitogen-activated protein kinase kinase kinas      | Multiple_Complex |
| TC0X00007053.hg.1    | 5.46  | 5.09  | 1.3   | 0.0099 | 0.0306 | MAOA      | monoamine oxidase A                                | Multiple_Complex |
| TC0500012145.hg.1    | 4.15  | 4.66  | -1.43 | 0.01   | 0.0307 | KLHL3     | kelch-like family member 3                         | Multiple_Complex |
| TC1600009260.hg.1    | 4.91  | 5.56  | -1.57 | 0.01   | 0.0307 | EEF2KMT   | eukaryotic elongation factor 2 lysine methyltr     | Multiple_Complex |
| TC0100009866.hg.1    | 12.84 | 11.52 | 2.49  | 0.01   | 0.0307 | FCGR1A    | Fc fragment of IgG, high affinity Ia, receptor (C  | Multiple_Complex |
| TC1000009841.hg.1    | 6.5   | 6.16  | 1.26  | 0.01   | 0.0307 | PHYH      | phytanoyl-CoA 2-hydroxylase                        | Multiple_Complex |
| TC1900011850.hg.1    | 5.34  | 5.1   | 1.18  | 0.01   | 0.0307 | FUT5      | fucosyltransferase 5 (alpha (1,3) fucosyltransf    | Coding           |
| TC1700011743.hg.1    | 7.44  | 7.96  | -1.44 | 0.01   | 0.0308 | GGA3      | golgi-associated, gamma adaptin ear containin      | Multiple_Complex |
| TC0400012212.hg.1    | 4.38  | 3.82  | 1.48  | 0.01   | 0.0308 | ASIC5     | acid sensing ion channel family member 5           | Coding           |
| TC1400007285.hg.1    | 8.54  | 8.95  | -1.33 | 0.01   | 0.0308 | NAA30     | N(alpha)-acetyltransferase 30, NatC catalytic s    | Multiple_Complex |
| TC1600010004.hg.1    | 4.3   | 4.71  | -1.32 | 0.01   | 0.0308 | ZNF646    | Memczak2013 ANTISENSE, coding, INTERNAL, Non       | Coding           |
| TC0500010731.hg.1    | 8.27  | 9.32  | -2.07 | 0.01   | 0.0308 | ARL15     | ADP-ribosylation factor like GTPase 15             | Multiple_Complex |
| TC1100013189.hg.1    | 5.95  | 5.27  | 1.6   | 0.01   | 0.0309 | CFL1      | cofilin 1 (non-muscle)                             | NonCoding        |
| TC1900007399.hg.1    | 5.89  | 5.47  | 1.34  | 0.01   | 0.0309 | TMEM59L   | transmembrane protein 59-like                      | Multiple_Complex |
| TC2000007105.hg.1    | 12.26 | 12.39 | -1.09 | 0.0101 | 0.0309 | TM9SF4    | transmembrane 9 superfamily protein membe          | Multiple_Complex |
| TC0100015994.hg.1    | 8.23  | 8.86  | -1.55 | 0.0101 | 0.0309 | CCT3      | chaperonin containing TCP1, subunit 3 (gamm        | Multiple_Complex |
| TC0500008884.hg.1    | 4.29  | 3.84  | 1.36  | 0.0101 | 0.031  | PCDH13    | protocadherin beta 13                              | Coding           |
| TC0500012127.hg.1    | 4.45  | 4.87  | -1.33 | 0.0101 | 0.031  | TRPC7     | transient receptor potential cation channel, st    | Multiple_Complex |
| TC2000009602.hg.1    | 8.85  | 10.41 | -2.96 | 0.0101 | 0.031  | ZBP1      | Z-DNA binding protein 1                            | Multiple_Complex |
| TC1400010702.hg.1    | 4.46  | 4.81  | -1.28 | 0.0101 | 0.031  | TEX22     | testis expressed 22                                | Multiple_Complex |
| TC0100013367.hg.1    | 4.93  | 4.5   | 1.35  | 0.0101 | 0.0311 | AUNIP     | aurora kinase A and ninein interacting protein     | Multiple_Complex |
| TC0X00011354.hg.1    | 4.99  | 4.59  | 1.32  | 0.0101 | 0.0311 | FIGF      | c-fos induced growth factor (vascular endothe      | Multiple_Complex |
| TC0100018510.hg.1    | 6.18  | 6.89  | -1.64 | 0.0102 | 0.0312 | GLMP      | glycosylated lysosomal membrane protein            | Multiple_Complex |
| TC0X00011198.hg.1    | 7.5   | 7.1   | 1.32  | 0.0102 | 0.0312 | DNASE1L1  | deoxyribonuclease I-like 1                         | Multiple_Complex |
| TC1100006749.hg.1    | 4.41  | 4.07  | 1.27  | 0.0102 | 0.0312 | ZNF215    | zinc finger protein 215                            | Multiple_Complex |
| TC0100011755.hg.1    | 4.77  | 4     | 1.7   | 0.0102 | 0.0312 | DNAH14    | dynein, axonemal, heavy chain 14                   | Multiple_Complex |
| TC0100011797.hg.1    | 7.35  | 7.03  | 1.25  | 0.0102 | 0.0313 | C1orf95   | chromosome 1 open reading frame 95                 | Multiple_Complex |
| TC0300011236.hg.1    | 3.64  | 3.27  | 1.29  | 0.0102 | 0.0313 | LRTM1     | leucine-rich repeats and transmembrane dom         | Coding           |
| TC1100009540.hg.1    | 6.4   | 5.98  | 1.34  | 0.0102 | 0.0313 | C11orf44  | chromosome 11 open reading frame 44                | Multiple_Complex |



|                   |       |       |       |        |                   |                                                 |                  |
|-------------------|-------|-------|-------|--------|-------------------|-------------------------------------------------|------------------|
| TC0800006975.hg.1 | 4.9   | 4.76  | 1.11  | 0.0102 | 0.0314 BMP1       | bone morphogenetic protein 1                    | Multiple_Complex |
| TC0100015789.hg.1 | 5.89  | 4.98  | 1.87  | 0.0102 | 0.0314 POGZ       | Transcript Identified by AceView, Entrez Gene   | Unassigned       |
| TC1300009712.hg.1 | 6.34  | 5.81  | 1.45  | 0.0103 | 0.0314 EFN2       | ephrin-B2                                       | Coding           |
| TC0700013328.hg.1 | 3.46  | 3.88  | -1.34 | 0.0103 | 0.0315 CHST12     | carbohydrate (chondroitin 4) sulfotransferase   | NonCoding        |
| TC2100008577.hg.1 | 5.79  | 5.36  | 1.34  | 0.0103 | 0.0315 KRTAP10-6  | keratin associated protein 10-6                 | Coding           |
| TC0800012349.hg.1 | 5.25  | 5.79  | -1.45 | 0.0103 | 0.0315 MTBP       | MDM2 binding protein                            | Multiple_Complex |
| TC0200010817.hg.1 | 4.7   | 4.26  | 1.36  | 0.0103 | 0.0315 WNT6       | wingless-type MMTV integration site family, n   | Multiple_Complex |
| TC1700011430.hg.1 | 8.67  | 9.22  | -1.47 | 0.0103 | 0.0315 CD79B      | CD79b molecule, immunoglobulin-associated       | Multiple_Complex |
| TC0400012967.hg.1 | 5.7   | 5.4   | 1.23  | 0.0103 | 0.0315 MGARP      | mitochondria localized glutamic acid rich prot  | Coding           |
| TC1700009478.hg.1 | 4.6   | 4.19  | 1.33  | 0.0103 | 0.0315 OR1E1      | olfactory receptor, family 1, subfamily E, mem  | Coding           |
| TC1200011855.hg.1 | 6.38  | 6.01  | 1.29  | 0.0103 | 0.0315 SVOP       | SV2 related protein                             | Multiple_Complex |
| TC1200007881.hg.1 | 4.54  | 4.14  | 1.32  | 0.0103 | 0.0316 INHBE      | inhibin beta E                                  | Multiple_Complex |
| TC1200007796.hg.1 | 4.45  | 3.98  | 1.38  | 0.0103 | 0.0316 OR6C68     | olfactory receptor, family 6, subfamily C, mem  | Coding           |
| TC1900010479.hg.1 | 5.03  | 4.47  | 1.47  | 0.0103 | 0.0316 DMKN       | dermokine                                       | Multiple_Complex |
| TC0X00007370.hg.1 | 3.3   | 3.75  | -1.37 | 0.0103 | 0.0316 APEX2      | Transcript Identified by AceView, Entrez Gene   | Unassigned       |
| TC0300012676.hg.1 | 6     | 5.55  | 1.36  | 0.0103 | 0.0316 PCOLCE2    | procollagen C-endopeptidase enhancer 2          | Multiple_Complex |
| TC1200007163.hg.1 | 5.07  | 5.5   | -1.35 | 0.0103 | 0.0316 KLHL42     | kelch-like family member 42                     | Multiple_Complex |
| TC0200016587.hg.1 | 6.11  | 5.65  | 1.37  | 0.0104 | 0.0317 PLCL1      | phospholipase C-like 1                          | Multiple_Complex |
| TC0X00007229.hg.1 | 4.11  | 3.5   | 1.53  | 0.0104 | 0.0317 GAGE12F; ( | G antigen 12F; G antigen 12J; G antigen 12D; (  | Coding           |
| TC0900009588.hg.1 | 5.72  | 6.17  | -1.36 | 0.0104 | 0.0317 TTC39B     | Transcript Identified by AceView, Entrez Gene   | Unassigned       |
| TC1000009893.hg.1 | 5.16  | 4.53  | 1.55  | 0.0104 | 0.0317 ITGA8      | integrin alpha 8                                | Multiple_Complex |
| TC1700008228.hg.1 | 3.49  | 3.91  | -1.34 | 0.0104 | 0.0318 ITGA3      | integrin alpha 3                                | Multiple_Complex |
| TC1200010971.hg.1 | 9.62  | 9.43  | 1.14  | 0.0104 | 0.0318 DCTN2      | dynactin 2 (p50)                                | Multiple_Complex |
| TC1400009786.hg.1 | 4.49  | 4.2   | 1.22  | 0.0104 | 0.0318 ISM2       | isthmin 2                                       | Multiple_Complex |
| TC1500007231.hg.1 | 4.81  | 4.46  | 1.27  | 0.0104 | 0.0318 GLDN       | gliomedin                                       | Multiple_Complex |
| TC0100018509.hg.1 | 6.38  | 5.85  | 1.44  | 0.0104 | 0.0319 GLMP       | glycosylated lysosomal membrane protein         | NonCoding        |
| TC1500009508.hg.1 | 5.5   | 4.9   | 1.51  | 0.0104 | 0.0319 NEDD4      | neural precursor cell expressed, development    | Multiple_Complex |
| TC0800008349.hg.1 | 3.83  | 3.49  | 1.27  | 0.0104 | 0.0319 OSR2       | odd-skipped related transcription factor 2      | Multiple_Complex |
| TC1100013186.hg.1 | 10.1  | 10.32 | -1.17 | 0.0104 | 0.0319 SYVN1      | synovial apoptosis inhibitor 1, synoviolin      | Multiple_Complex |
| TC0200014269.hg.1 | 4.12  | 3.66  | 1.37  | 0.0105 | 0.0319 POTE1      | POTE ankyrin domain family, member I            | Multiple_Complex |
| TC1100012381.hg.1 | 3.95  | 3.4   | 1.46  | 0.0105 | 0.0319 NXPE1      | neurexophilin and PC-esterase domain family,    | Coding           |
| TC1200009926.hg.1 | 3.63  | 4.19  | -1.48 | 0.0105 | 0.0319 TAS2R50    | taste receptor, type 2, member 50               | Coding           |
| TC2000009242.hg.1 | 6.3   | 5.88  | 1.33  | 0.0105 | 0.0319 WFDC3      | WAP four-disulfide core domain 3                | Multiple_Complex |
| TC1200011882.hg.1 | 4.68  | 4.27  | 1.33  | 0.0105 | 0.0319 TRPV4      | transient receptor potential cation channel, su | Multiple_Complex |
| TC1700012230.hg.1 | 12.87 | 13.33 | -1.37 | 0.0105 | 0.0319 ZNF207; M  | zinc finger protein 207; microRNA 632           | Multiple_Complex |
| TC0100012588.hg.1 | 4.71  | 5.14  | -1.35 | 0.0105 | 0.0319 MEGF6      | multiple EGF-like-domains 6                     | Multiple_Complex |
| TC0500008702.hg.1 | 8.68  | 8.05  | 1.55  | 0.0105 | 0.0319 CAMLG      | calcium modulating ligand                       | Multiple_Complex |
| TC1900011722.hg.1 | 7.66  | 8.29  | -1.55 | 0.0105 | 0.032 HKR1        | HKR1, GLI-Kruppel zinc finger family member     | Multiple_Complex |
| TC0100014048.hg.1 | 5.42  | 5.83  | -1.32 | 0.0105 | 0.032 POMGNT1     | protein O-linked mannose N-acetylglucosamin     | Multiple_Complex |
| TC0600010002.hg.1 | 5.31  | 5.76  | -1.36 | 0.0105 | 0.032 SYNJ2       | synaptojanin 2                                  | Multiple_Complex |
| TC0200015019.hg.1 | 7.41  | 6.82  | 1.5   | 0.0105 | 0.0321 KIAA1715   | KIAA1715                                        | Multiple_Complex |
| TC1400008636.hg.1 | 7.47  | 7.99  | -1.44 | 0.0105 | 0.0321 METTL3     | methyltransferase like 3                        | Multiple_Complex |
| TC1400006506.hg.1 | 3.98  | 3.41  | 1.49  | 0.0105 | 0.0321 OR11G2     | olfactory receptor, family 11, subfamily G, me  | Coding           |
| TC2000010008.hg.1 | 5.81  | 6.28  | -1.38 | 0.0105 | 0.0321 NFS1       | NFS1 cysteine desulfurase                       | Multiple_Complex |
| TC0300007448.hg.1 | 4.49  | 4.15  | 1.27  | 0.0106 | 0.0322 IQCF3      | Transcript Identified by AceView, Entrez Gene   | Unassigned       |
| TC0300009451.hg.1 | 7.55  | 6.96  | 1.51  | 0.0106 | 0.0322 MYNN       | myoneurin                                       | Multiple_Complex |
| TC2200007439.hg.1 | 4.23  | 3.81  | 1.33  | 0.0106 | 0.0322 MCHR1      | melanin-concentrating hormone receptor 1        | Multiple_Complex |
| TC0800012280.hg.1 | 8.09  | 8.86  | -1.71 | 0.0106 | 0.0322 PDLIM2     | PDZ and LIM domain 2 (mystique)                 | Multiple_Complex |
| TC1200008601.hg.1 | 3.9   | 3.39  | 1.42  | 0.0106 | 0.0322 ANO4       | anoctamin 4                                     | Multiple_Complex |
| TC1100009284.hg.1 | 4.51  | 4.89  | -1.3  | 0.0106 | 0.0323 POU2F3     | POU class 2 homeobox 3                          | Multiple_Complex |
| TC0300011145.hg.1 | 3.76  | 3.36  | 1.32  | 0.0106 | 0.0324 IQCF1      | IQ motif containing F1                          | Coding           |
| TC1900011846.hg.1 | 6.19  | 5.83  | 1.28  | 0.0107 | 0.0324 PLIN5      | perilipin 5                                     | Multiple_Complex |
| TC0300013853.hg.1 | 4.13  | 3.68  | 1.37  | 0.0107 | 0.0324 ST3GAL6    | ST3 beta-galactoside alpha-2,3-sialyltransfera  | NonCoding        |
| TC1300007824.hg.1 | 8.32  | 8.81  | -1.4  | 0.0107 | 0.0325 UBAC2      | UBA domain containing 2                         | Multiple_Complex |
| TC1900011257.hg.1 | 4.19  | 4.79  | -1.51 | 0.0107 | 0.0325 SIGLEC8    | sialic acid binding Ig-like lectin 8            | Multiple_Complex |
| TC0100013311.hg.1 | 10.42 | 10.79 | -1.29 | 0.0107 | 0.0325 SRSF10     | serine/arginine-rich splicing factor 10         | Multiple_Complex |
| TC0100010518.hg.1 | 9.32  | 10.02 | -1.62 | 0.0107 | 0.0325 DCAF6      | DDB1 and CUL4 associated factor 6               | Multiple_Complex |
| TC1600009162.hg.1 | 5.03  | 5.56  | -1.45 | 0.0107 | 0.0325 HCFC1R1    | host cell factor C1 regulator 1 (XPO1 depende   | Multiple_Complex |
| TC1900007882.hg.1 | 4.87  | 5.4   | -1.44 | 0.0107 | 0.0325 PROSER3    | proline and serine rich 3                       | Multiple_Complex |
| TC0400007806.hg.1 | 4.01  | 3.62  | 1.31  | 0.0107 | 0.0325 NPFFR2     | neuropeptide FF receptor 2                      | Multiple_Complex |
| TC0200014860.hg.1 | 4.55  | 4.01  | 1.45  | 0.0107 | 0.0326 CCDC173    | coiled-coil domain containing 173               | Coding           |
| TC0300012170.hg.1 | 8.13  | 7.62  | 1.42  | 0.0107 | 0.0326 GOLGB1     | golgin B1                                       | Multiple_Complex |
| TC1100008126.hg.1 | 6.96  | 6.45  | 1.42  | 0.0107 | 0.0326 ANKRD13D   | ankyrin repeat domain 13 family, member D       | Multiple_Complex |
| TC0300008474.hg.1 | 6.09  | 6.71  | -1.55 | 0.0107 | 0.0326 POGUT1     | protein O-glucosyltransferase 1                 | Multiple_Complex |
| TC1900011703.hg.1 | 4.89  | 4.39  | 1.42  | 0.0107 | 0.0326 ZNF536     | zinc finger protein 536                         | NonCoding        |
| TC1900007142.hg.1 | 3.83  | 4.13  | -1.23 | 0.0107 | 0.0326 ZSWIM4     | zinc finger, SWIM-type containing 4             | Multiple_Complex |
| TC0500012596.hg.1 | 4.44  | 4.92  | -1.4  | 0.0108 | 0.0327 FNDC9      | fibronectin type III domain containing 9        | Coding           |
| TC0900006872.hg.1 | 5     | 4.47  | 1.44  | 0.0108 | 0.0327 LOC100506  | putative deoxyuridine 5-triphosphate nucleoti   | Multiple_Complex |
| TC1100009171.hg.1 | 5.62  | 6.15  | -1.44 | 0.0108 | 0.0327 RNF214     | ring finger protein 214                         | Multiple_Complex |
| TC0X00010954.hg.1 | 6.83  | 6.51  | 1.25  | 0.0108 | 0.0328 FGF13; LIN | fibroblast growth factor 13; long intergenic nc | Multiple_Complex |

|                   |       |       |        |        |                   |                                                      |                  |
|-------------------|-------|-------|--------|--------|-------------------|------------------------------------------------------|------------------|
| TC0X00008836.hg.1 | 4.55  | 5.2   | -1.57  | 0.0108 | 0.0328 PLXNA3     | plexin A3                                            | Multiple_Complex |
| TC0300008888.hg.1 | 11.55 | 10.76 | 1.73   | 0.0108 | 0.0328 CEP63      | centrosomal protein 63kDa                            | Multiple_Complex |
| TC0300010521.hg.1 | 5.13  | 4.48  | 1.57   | 0.0108 | 0.0328 THRB       | thyroid hormone receptor, beta                       | Multiple_Complex |
| TC0200009344.hg.1 | 4.77  | 4.32  | 1.36   | 0.0108 | 0.0328 CCDC74A    | coiled-coil domain containing 74A                    | Multiple_Complex |
| TC0300013809.hg.1 | 13.23 | 14.45 | -2.34  | 0.0108 | 0.0329 RPL14      | ribosomal protein L14                                | Multiple_Complex |
| TC1600011409.hg.1 | 4.77  | 5.31  | -1.46  | 0.0108 | 0.0329 PDP2       | pyruvate dehydrogenase phosphatase catalytic         | Multiple_Complex |
| TC0500006614.hg.1 | 7.67  | 8.11  | -1.36  | 0.0108 | 0.0329 ICE1       | interactor of little elongation complex ELL sub      | Multiple_Complex |
| TC1700006644.hg.1 | 7.76  | 7.16  | 1.52   | 0.0109 | 0.0329 PSMB6      | proteasome subunit beta 6                            | Multiple_Complex |
| TC1200010284.hg.1 | 5.84  | 6.49  | -1.57  | 0.0109 | 0.033 DENND5B     | DENN/MADD domain containing 5B                       | Multiple_Complex |
| TC1800008474.hg.1 | 8.02  | 8.46  | -1.35  | 0.0109 | 0.0331 SLC39A6    | solute carrier family 39 (zinc transporter), me      | Multiple_Complex |
| TC0600008262.hg.1 | 5.71  | 6.18  | -1.38  | 0.0109 | 0.0331 TMEM14A    | transmembrane protein 14A                            | Multiple_Complex |
| TC0500013370.hg.1 | 4.21  | 3.77  | 1.36   | 0.0109 | 0.0331 SIL1       | SIL1 nucleotide exchange factor                      | NonCoding        |
| TC0500013372.hg.1 | 5.52  | 5.03  | 1.41   | 0.0109 | 0.0331 ECSCR      | endothelial cell surface expressed chemotaxis        | Multiple_Complex |
| TC0100018464.hg.1 | 4.73  | 4.32  | 1.33   | 0.0109 | 0.0332 PPM1J      | protein phosphatase, Mg2+/Mn2+ dependent             | Multiple_Complex |
| TC1100006840.hg.1 | 7.46  | 8.06  | -1.52  | 0.0109 | 0.0332 CTR9       | CTR9 homolog, Paf1/RNA polymerase II comp            | Multiple_Complex |
| TC0500007421.hg.1 | 7.67  | 6.76  | 1.88   | 0.0109 | 0.0332 SKIV2L2    | superkiller viralicidic activity 2-like 2 (S. cerevi | Multiple_Complex |
| TC0500013336.hg.1 | 8.79  | 9.42  | -1.55  | 0.011  | 0.0332 SSBP2      | single-stranded DNA binding protein 2                | Multiple_Complex |
| TC2000006956.hg.1 | 5.31  | 4.66  | 1.57   | 0.011  | 0.0332 NXT1       | nuclear transport factor 2-like export factor 1      | Multiple_Complex |
| TC0900010702.hg.1 | 12.27 | 12.63 | -1.29  | 0.011  | 0.0332 SEMA4D     | sema domain, immunoglobulin domain (Ig), tr          | Multiple_Complex |
| TC2200007013.hg.1 | 9.91  | 10.36 | -1.37  | 0.011  | 0.0332 EWSR1      | EWS RNA binding protein 1                            | Multiple_Complex |
| TC0300013840.hg.1 | 6.79  | 6.28  | 1.42   | 0.011  | 0.0333 ABHD14A-/- | ABHD14A-ACY1 readthrough                             | Multiple_Complex |
| TC2200006637.hg.1 | 6.66  | 7.28  | -1.54  | 0.011  | 0.0333 DGCR8      | Memczak2013 ALT_ACCEPTOR, ALT_DONOR,                 | NonCoding        |
| TC1400009912.hg.1 | 10.35 | 9.98  | 1.29   | 0.011  | 0.0334 GALC       | galactosylceramidase                                 | Multiple_Complex |
| TC1200010552.hg.1 | 5.48  | 5.18  | 1.24   | 0.011  | 0.0334 ENDOU      | endonuclease, polyU-specific                         | Multiple_Complex |
| TC1300008108.hg.1 | 6.6   | 6.2   | 1.32   | 0.011  | 0.0334 F7         | coagulation factor VII (serum prothrombin cor        | Multiple_Complex |
| TC0700012871.hg.1 | 4.78  | 4.32  | 1.38   | 0.0111 | 0.0335 OR9A2      | olfactory receptor, family 9, subfamily A, men       | Coding           |
| TC1600008568.hg.1 | 8.95  | 9.69  | -1.67  | 0.0111 | 0.0336 ATMIN      | ATM interactor                                       | Multiple_Complex |
| TC0Y00007321.hg.1 | 5.24  | 4.8   | 1.36   | 0.0111 | 0.0336 ASMT       | Homo sapiens acetylserotonin O-methyltransf          | Coding           |
| TC0500009629.hg.1 | 8.13  | 7.6   | 1.44   | 0.0111 | 0.0336 TMED9      | transmembrane p24 trafficking protein 9              | Multiple_Complex |
| TC1200012773.hg.1 | 3.85  | 3.36  | 1.4    | 0.0111 | 0.0336 ST8SIA1    | ST8 alpha-N-acetyl-neuraminide alpha-2,8-sial        | NonCoding        |
| TC1700011919.hg.1 | 11.89 | 10.83 | 2.08   | 0.0111 | 0.0336 CEP295NL   | CEP295 N-terminal like; TIMP metallopeptidas         | Multiple_Complex |
| TC1200011470.hg.1 | 11.16 | 11.87 | -1.64  | 0.0111 | 0.0336 DUSP6      | dual specificity phosphatase 6                       | Multiple_Complex |
| TC1900008882.hg.1 | 7.48  | 7.69  | -1.16  | 0.0111 | 0.0336 NCR1       | natural cytotoxicity triggering receptor 1           | Multiple_Complex |
| TC0800012433.hg.1 | 8.38  | 8.89  | -1.43  | 0.0111 | 0.0336 TPDS2      | tumor protein D52                                    | Multiple_Complex |
| TC0700007034.hg.1 | 14.56 | 15.44 | -1.84  | 0.0111 | 0.0336 CREB5      | cAMP responsive element binding protein 5            | Multiple_Complex |
| TC0300010889.hg.1 | 5.51  | 5.94  | -1.34  | 0.0112 | 0.0337 ZNF445     | zinc finger protein 445                              | Multiple_Complex |
| TC1800008189.hg.1 | 3.88  | 3.44  | 1.36   | 0.0112 | 0.0337 POTE       | POTE ankyrin domain family, member C                 | Multiple_Complex |
| TC1100007838.hg.1 | 3.97  | 3.53  | 1.36   | 0.0112 | 0.0337 SCGB2A1    | secretoglobulin, family 2A, member 1                 | Coding           |
| TC1900011941.hg.1 | 9.53  | 10.25 | -1.65  | 0.0112 | 0.0337 HNRNPL     | heterogeneous nuclear ribonucleoprotein L            | Multiple_Complex |
| TC0400008160.hg.1 | 4.08  | 3.68  | 1.32   | 0.0112 | 0.0337 GRID2      | glutamate receptor, ionotropic, delta 2              | Multiple_Complex |
| TC2000008533.hg.1 | 4.49  | 5.02  | -1.44  | 0.0112 | 0.0337 RBBP9      | retinoblastoma binding protein 9                     | Multiple_Complex |
| TC1100010751.hg.1 | 9.66  | 9.25  | 1.33   | 0.0112 | 0.0337 KBTBD4     | kelch repeat and BTB (POZ) domain containin          | Multiple_Complex |
| TC0500007607.hg.1 | 5.45  | 6.04  | -1.5   | 0.0112 | 0.0337 NLN        | neurolysin (metallopeptidase M3 family)              | Multiple_Complex |
| TC0900010462.hg.1 | 6.5   | 7.15  | -1.56  | 0.0112 | 0.0338 RFK        | riboflavin kinase                                    | Multiple_Complex |
| TC1800007411.hg.1 | 6.18  | 7.14  | -1.94  | 0.0112 | 0.0338 NEDD4L     | neural precursor cell expressed, development         | Multiple_Complex |
| TC0500009423.hg.1 | 6.71  | 5.81  | 1.88   | 0.0112 | 0.0339 NPM1       | Zhang2013 ALT_ACCEPTOR, ALT_DONOR, cod               | NonCoding        |
| TC0300011517.hg.1 | 14.66 | 13.6  | 2.08   | 0.0112 | 0.0339 PROK2      | prokineticin 2                                       | Coding           |
| TC0200006951.hg.1 | 6.58  | 5.42  | 2.23   | 0.0112 | 0.0339 UBXN2A     | UBX domain protein 2A                                | Multiple_Complex |
| TC1600008000.hg.1 | 5.08  | 4.82  | 1.19   | 0.0112 | 0.0339 CCL17      | chemokine (C-C motif) ligand 17                      | Coding           |
| TC0700013047.hg.1 | 6.89  | 10.31 | -10.73 | 0.0112 | 0.0339 TMEM176E   | transmembrane protein 176B                           | Coding           |
| TC0700007467.hg.1 | 4.28  | 3.89  | 1.31   | 0.0113 | 0.034 C7orf65     | chromosome 7 open reading frame 65                   | Multiple_Complex |
| TC0100013548.hg.1 | 9.12  | 10.17 | -2.07  | 0.0113 | 0.034 PUM1        | pumilio RNA binding family member 1                  | Multiple_Complex |
| TC1800009283.hg.1 | 10.76 | 10.34 | 1.34   | 0.0113 | 0.034 SMAD2       | SMAD family member 2                                 | Multiple_Complex |
| TC2200008682.hg.1 | 5.53  | 6.1   | -1.48  | 0.0113 | 0.034 PLA2G6      | phospholipase A2, group VI (cytosolic, calcium       | Multiple_Complex |
| TC1900009287.hg.1 | 5.91  | 6.32  | -1.33  | 0.0113 | 0.0341 SMIM24     | small integral membrane protein 24                   | Multiple_Complex |
| TC0100007447.hg.1 | 4.12  | 4.5   | -1.3   | 0.0113 | 0.0341 CEP85      | centrosomal protein 85kDa                            | Multiple_Complex |
| TC0200010246.hg.1 | 8.99  | 9.36  | -1.29  | 0.0113 | 0.0341 WDR75      | WD repeat domain 75                                  | Multiple_Complex |
| TC0100017420.hg.1 | 5.59  | 5.01  | 1.49   | 0.0113 | 0.0341 DUSP10     | dual specificity phosphatase 10                      | Multiple_Complex |
| TC0500012501.hg.1 | 8.97  | 8.63  | 1.26   | 0.0113 | 0.0341 CCDC69     | coiled-coil domain containing 69                     | Multiple_Complex |
| TC0X00007977.hg.1 | 4.81  | 5.33  | -1.44  | 0.0114 | 0.0342 GPRASP1    | G protein-coupled receptor associated sorting        | Multiple_Complex |
| TC0200014717.hg.1 | 5.39  | 5.9   | -1.42  | 0.0114 | 0.0342 WDSUB1     | WD repeat, sterile alpha motif and U-box dom         | Multiple_Complex |
| TC1400009711.hg.1 | 8.98  | 9.55  | -1.48  | 0.0114 | 0.0342 NEK9       | NIMA-related kinase 9                                | Multiple_Complex |
| TC1100009685.hg.1 | 4.65  | 5.63  | -1.97  | 0.0114 | 0.0342 IRF7       | interferon regulatory factor 7                       | Multiple_Complex |
| TC1200008845.hg.1 | 4.52  | 4.03  | 1.41   | 0.0114 | 0.0342 RAD9B      | RAD9 checkpoint clamp component B                    | Multiple_Complex |
| TC0400009714.hg.1 | 5.86  | 5.56  | 1.23   | 0.0114 | 0.0343 SLC26A1    | solute carrier family 26 (anion exchanger), me       | Multiple_Complex |
| TC0900009301.hg.1 | 6.08  | 6.49  | -1.32  | 0.0114 | 0.0343 MRPL41     | mitochondrial ribosomal protein L41                  | Multiple_Complex |
| TC0200014192.hg.1 | 9.1   | 9.69  | -1.51  | 0.0114 | 0.0344 SAP130     | Sin3A associated protein 130kDa                      | Multiple_Complex |
| TC0100011153.hg.1 | 4.79  | 4.29  | 1.42   | 0.0114 | 0.0344 C1orf106   | chromosome 1 open reading frame 106                  | Multiple_Complex |
| TC1700011096.hg.1 | 4.53  | 4.88  | -1.27  | 0.0115 | 0.0344 MRPL27     | mitochondrial ribosomal protein L27                  | Multiple_Complex |
| TC0100007303.hg.1 | 6.39  | 6.77  | -1.3   | 0.0115 | 0.0344 KDM1A; M   | lysine (K)-specific demethylase 1A; microRNA         | Multiple_Complex |

|                   |       |       |       |        |                   |                                                              |                  |
|-------------------|-------|-------|-------|--------|-------------------|--------------------------------------------------------------|------------------|
| TC0200007805.hg.1 | 12.76 | 12.34 | 1.34  | 0.0115 | 0.0344 AFTPH      | aftiphilin                                                   | Multiple_Complex |
| TC1900011587.hg.1 | 7.43  | 7.76  | -1.25 | 0.0115 | 0.0344 ZNF552     | zinc finger protein 552                                      | Multiple_Complex |
| TC0700013395.hg.1 | 6.82  | 7.57  | -1.68 | 0.0115 | 0.0344 GTPBP10    | GTP-binding protein 10 (putative)                            | Multiple_Complex |
| TC1200011865.hg.1 | 4.87  | 4.53  | 1.26  | 0.0115 | 0.0344 FOXN4      | forkhead box N4                                              | Coding           |
| TC0700013471.hg.1 | 5.19  | 4.57  | 1.54  | 0.0115 | 0.0344 MGAM       | maltase-glucoamylase                                         | NonCoding        |
| TC2000007943.hg.1 | 6.9   | 6.43  | 1.38  | 0.0115 | 0.0345 CDH26      | cadherin 26                                                  | Multiple_Complex |
| TC1700011768.hg.1 | 7.2   | 6.83  | 1.29  | 0.0115 | 0.0346 GALK1      | galactokinase 1                                              | Multiple_Complex |
| TC0300012009.hg.1 | 6.81  | 7.26  | -1.36 | 0.0115 | 0.0346 C3orf17    | chromosome 3 open reading frame 17                           | Multiple_Complex |
| TC1200011598.hg.1 | 10.28 | 9.3   | 1.98  | 0.0115 | 0.0346 HAL        | histidine ammonia-lyase                                      | Multiple_Complex |
| TC0X00006841.hg.1 | 5.51  | 4.84  | 1.59  | 0.0115 | 0.0346 MAGEB5     | MAGE family member B5                                        | Coding           |
| TC1700006449.hg.1 | 5.77  | 6.07  | -1.23 | 0.0116 | 0.0348 C17orf97   | chromosome 17 open reading frame 97                          | Multiple_Complex |
| TC0900009673.hg.1 | 9.91  | 9.1   | 1.74  | 0.0116 | 0.0348 MLLT3      | myeloid/lymphoid or mixed-lineage leukemia; Multiple_Complex | Multiple_Complex |
| TC2200007211.hg.1 | 3.69  | 3.32  | 1.29  | 0.0116 | 0.0348 RASD2      | RASD family, member 2                                        | Coding           |
| TC0X00011144.hg.1 | 4.3   | 4.05  | 1.18  | 0.0116 | 0.0348 PNMA5      | paraneoplastic Ma antigen family member 5                    | Multiple_Complex |
| TC0900009960.hg.1 | 4.2   | 3.8   | 1.32  | 0.0116 | 0.0348 OR13J1     | olfactory receptor, family 13, subfamily J, member           | Coding           |
| TC1700009861.hg.1 | 9.38  | 9.07  | 1.24  | 0.0116 | 0.0349 TVP23C; C1 | trans-golgi network vesicle protein 23 homolog               | Multiple_Complex |
| TC1900011920.hg.1 | 7.76  | 8.24  | -1.39 | 0.0116 | 0.0349 ZNF98      | zinc finger protein 98                                       | Multiple_Complex |
| TC2200009365.hg.1 | 8.72  | 8.23  | 1.4   | 0.0117 | 0.035 CHKB        | choline kinase beta                                          | Multiple_Complex |
| TC1400006483.hg.1 | 4.39  | 3.82  | 1.48  | 0.0117 | 0.035 OR4N2       | olfactory receptor, family 4, subfamily N, member            | Coding           |
| TC0500013391.hg.1 | 7.6   | 8.1   | -1.41 | 0.0117 | 0.035 PWWP2A      | PWWP domain containing 2A                                    | Multiple_Complex |
| TC2000008279.hg.1 | 7.03  | 8.1   | -2.09 | 0.0117 | 0.035 PCNA        | proliferating cell nuclear antigen                           | Multiple_Complex |
| TC1700012412.hg.1 | 4.86  | 4.19  | 1.59  | 0.0117 | 0.035 KRT33B      | keratin 33B, type I                                          | Coding           |
| TC2200008615.hg.1 | 4.5   | 4.01  | 1.4   | 0.0117 | 0.0351 CACNG2     | calcium channel, voltage-dependent, gamma 2                  | NonCoding        |
| TC1200006450.hg.1 | 10.07 | 10.64 | -1.48 | 0.0117 | 0.0351 WNK1       | WNK lysine deficient protein kinase 1                        | Multiple_Complex |
| TC0300009531.hg.1 | 4.29  | 3.8   | 1.4   | 0.0117 | 0.0351 NLGN1      | neuroligin 1                                                 | Multiple_Complex |
| TC0100007791.hg.1 | 4.85  | 5.32  | -1.39 | 0.0117 | 0.0352 ADPRHL2    | ADP-ribosylhydrolase like 2                                  | Multiple_Complex |
| TC0100009902.hg.1 | 10.32 | 9.95  | 1.29  | 0.0118 | 0.0352 PRPF3      | pre-mRNA processing factor 3                                 | Multiple_Complex |
| TC1900009487.hg.1 | 6.39  | 6.08  | 1.24  | 0.0118 | 0.0352 XAB2       | XPA binding protein 2                                        | Multiple_Complex |
| TC0200011421.hg.1 | 6.17  | 5.69  | 1.4   | 0.0118 | 0.0352 ING5       | inhibitor of growth family member 5                          | Multiple_Complex |
| TC1900006979.hg.1 | 4.21  | 4.54  | -1.26 | 0.0118 | 0.0352 ICAM5      | intercellular adhesion molecule 5                            | Multiple_Complex |
| TC0900007100.hg.1 | 4.57  | 4.84  | -1.21 | 0.0118 | 0.0352 NPR2       | natriuretic peptide receptor 2                               | Multiple_Complex |
| TC0700006650.hg.1 | 7.29  | 7.92  | -1.54 | 0.0118 | 0.0352 C7orf26    | chromosome 7 open reading frame 26                           | Multiple_Complex |
| TC0100014313.hg.1 | 4.67  | 4.13  | 1.46  | 0.0118 | 0.0353 PPAP2B     | Transcript Identified by AceView, Entrez Gene                | Unassigned       |
| TC1600011451.hg.1 | 9.37  | 9.02  | 1.27  | 0.0118 | 0.0353 TCF25      | transcription factor 25 (basic helix-loop-helix)             | Multiple_Complex |
| TC1900008017.hg.1 | 6.37  | 6.05  | 1.25  | 0.0118 | 0.0353 RYR1       | ryanodine receptor 1 (skeletal)                              | Multiple_Complex |
| TC1100010998.hg.1 | 7.34  | 7.9   | -1.47 | 0.0118 | 0.0354 MS4A4E     | membrane-spanning 4-domains, subfamily A, member             | Multiple_Complex |
| TC1400006529.hg.1 | 5.18  | 4.69  | 1.41  | 0.0118 | 0.0354 ANG; RNAS  | angiogenin, ribonuclease, RNase A family, 5; ribonuclease    | Multiple_Complex |
| TC0100018179.hg.1 | 5.47  | 5.05  | 1.34  | 0.0118 | 0.0354 CLCNKA     | chloride channel, voltage-sensitive potassium                | NonCoding        |
| TC0500013231.hg.1 | 5.28  | 5.71  | -1.35 | 0.0118 | 0.0354 CATSPER3   | cation channel, sperm associated 3                           | Multiple_Complex |
| TC0900012155.hg.1 | 4.31  | 3.87  | 1.36  | 0.0119 | 0.0354 MSANTD3-1  | MSANTD3-TMEFF1 readthrough                                   | Coding           |
| TC0100016339.hg.1 | 5.46  | 4.97  | 1.4   | 0.0119 | 0.0355 DPT        | dermatopontin                                                | Coding           |
| TC1400010780.hg.1 | 7.4   | 7.02  | 1.3   | 0.0119 | 0.0355 ATXN3      | ataxin 3                                                     | Multiple_Complex |
| TC1400006522.hg.1 | 4.18  | 3.72  | 1.38  | 0.0119 | 0.0355 RNASE10    | ribonuclease, RNase A family, 10 (non-active)                | Coding           |
| TC1500008511.hg.1 | 8.17  | 8.55  | -1.3  | 0.0119 | 0.0355 LRRC28     | leucine rich repeat containing 28                            | Multiple_Complex |
| TC0500007808.hg.1 | 9.54  | 9.9   | -1.28 | 0.0119 | 0.0355 POLK       | polymerase (DNA directed) kappa                              | Multiple_Complex |
| TC2100008385.hg.1 | 8.91  | 8.51  | 1.31  | 0.0119 | 0.0355 SUMO3      | small ubiquitin-like modifier 3                              | Multiple_Complex |
| TC0X00011402.hg.1 | 6.78  | 7.27  | -1.4  | 0.0119 | 0.0355 SPANXA1    | sperm protein associated with the nucleus, X-linked          | Coding           |
| TC0Y00007322.hg.1 | 9.12  | 7.82  | 2.46  | 0.0119 | 0.0355 RPS4Y1     | ribosomal protein S4, Y-linked 1                             | Multiple_Complex |
| TC1300006879.hg.1 | 4.9   | 4.6   | 1.23  | 0.0119 | 0.0356 CCNA1      | cyclin A1                                                    | Multiple_Complex |
| TC1700007474.hg.1 | 7.09  | 6.64  | 1.37  | 0.0119 | 0.0356 RNF135     | ring finger protein 135                                      | Multiple_Complex |
| TC1600008675.hg.1 | 12.2  | 11.69 | 1.43  | 0.012  | 0.0357 KIAA0513   | KIAA0513                                                     | Multiple_Complex |
| TC0900011582.hg.1 | 5.37  | 4.8   | 1.48  | 0.012  | 0.0357 FAM129B    | family with sequence similarity 129, member B                | Multiple_Complex |
| TC1700012235.hg.1 | 3.99  | 3.59  | 1.33  | 0.012  | 0.0357 UNC45B     | unc-45 myosin chaperone B                                    | Coding           |
| TC0600007285.hg.1 | 9.8   | 8.96  | 1.79  | 0.012  | 0.0357 HIST1H2AE  | histone cluster 1, H2ae                                      | Coding           |
| TC0100006784.hg.1 | 6.68  | 6.23  | 1.37  | 0.012  | 0.0357 TMEM201    | transmembrane protein 201                                    | Multiple_Complex |
| TC0900008969.hg.1 | 5.87  | 6.33  | -1.37 | 0.012  | 0.0358 ABL1       | ABL proto-oncogene 1, non-receptor tyrosine kinase           | Multiple_Complex |
| TC1600010122.hg.1 | 4.88  | 4.79  | 1.06  | 0.012  | 0.0359 LINC00273  | long intergenic non-protein coding RNA 273                   | Multiple_Complex |
| TC2000010007.hg.1 | 9.74  | 10.47 | -1.66 | 0.0121 | 0.036 RBM12; CP   | RNA binding motif protein 12; copine I                       | Multiple_Complex |
| TC1900009684.hg.1 | 5.13  | 5.62  | -1.4  | 0.0121 | 0.036 ACP5        | acid phosphatase 5, tartrate resistant                       | Multiple_Complex |
| TC1700009122.hg.1 | 6.7   | 6.2   | 1.41  | 0.0121 | 0.036 SLC26A11    | solute carrier family 26 (anion exchanger), member 11        | Multiple_Complex |
| TC1900007852.hg.1 | 4.67  | 4.46  | 1.16  | 0.0121 | 0.036 FFAR3       | free fatty acid receptor 3                                   | Coding           |
| TC0800007957.hg.1 | 5.24  | 5.99  | -1.68 | 0.0121 | 0.036 RDH10       | retinol dehydrogenase 10 (all-trans)                         | Multiple_Complex |
| TC0X00008736.hg.1 | 6.16  | 5.76  | 1.32  | 0.0121 | 0.036 FATE1       | fetal and adult testis expressed 1                           | Coding           |
| TC1900012023.hg.1 | 7.09  | 7.55  | -1.37 | 0.0121 | 0.036 ZNF836      | zinc finger protein 836                                      | Multiple_Complex |
| TC0600009332.hg.1 | 4.62  | 4.2   | 1.34  | 0.0121 | 0.036 FABP7       | fatty acid binding protein 7, brain                          | Coding           |
| TC0300013386.hg.1 | 5     | 4.59  | 1.33  | 0.0121 | 0.036 THPO        | thrombopoietin                                               | Multiple_Complex |
| TC2100008380.hg.1 | 7.5   | 7.03  | 1.38  | 0.0121 | 0.0361 KRTAP12-2  | keratin associated protein 12-2                              | Coding           |
| TC0300007247.hg.1 | 5.41  | 5.66  | -1.19 | 0.0121 | 0.0361 CCR9       | chemokine (C-C motif) receptor 9                             | Multiple_Complex |
| TC1100010941.hg.1 | 4.38  | 3.91  | 1.38  | 0.0121 | 0.0361 OR5B3      | olfactory receptor, family 5, subfamily B, member 3          | Coding           |
| TC0500012039.hg.1 | 6.45  | 5.63  | 1.77  | 0.0121 | 0.0361 ZCCHC10    | zinc finger, CCHC domain containing 10                       | Multiple_Complex |

|                      |       |       |       |        |                   |                                                 |                  |
|----------------------|-------|-------|-------|--------|-------------------|-------------------------------------------------|------------------|
| TC0700013606.hg.1    | 8.25  | 8.85  | -1.51 | 0.0121 | 0.0361 THAP5      | THAP domain containing 5                        | Multiple_Complex |
| TC0X00009203.hg.1    | 4.6   | 4.23  | 1.3   | 0.0121 | 0.0361 MAP3K15    | mitogen-activated protein kinase kinase kinase  | Multiple_Complex |
| TC2000007945.hg.1    | 6.29  | 6.88  | -1.5  | 0.0122 | 0.0362 C20orf197  | chromosome 20 open reading frame 197            | Multiple_Complex |
| TC1500010845.hg.1    | 4.13  | 4.44  | -1.24 | 0.0122 | 0.0362 OTUD7A     | OTU deubiquitinase 7A                           | Multiple_Complex |
| TC1900008221.hg.1    | 4.95  | 4.59  | 1.28  | 0.0122 | 0.0362 PINLYP     | phospholipase A2 inhibitor and LY6/PLAUR do     | Multiple_Complex |
| TC1800008402.hg.1    | 6.47  | 6.06  | 1.33  | 0.0122 | 0.0362 SLC25A52   | solute carrier family 25, member 52             | Coding           |
| TC1600008938.hg.1    | 7.11  | 7.49  | -1.3  | 0.0122 | 0.0363 AXIN1      | axin 1                                          | Multiple_Complex |
| TC0900006451.hg.1    | 4.28  | 3.8   | 1.39  | 0.0122 | 0.0364 DMRT1      | doublesex and mab-3 related transcription fac   | Multiple_Complex |
| TC1000011522.hg.1    | 9.04  | 8.58  | 1.37  | 0.0123 | 0.0364 TM9SF3     | transmembrane 9 superfamily member 3            | Multiple_Complex |
| TC1200009566.hg.1    | 6.16  | 6.58  | -1.35 | 0.0123 | 0.0365 RAD52      | RAD52 homolog, DNA repair protein               | Multiple_Complex |
| TC0100006806.hg.1    | 10.05 | 10.53 | -1.4  | 0.0123 | 0.0365 UBE4B      | ubiquitination factor E4B                       | Multiple_Complex |
| TC0800009240.hg.1    | 9.93  | 10.77 | -1.79 | 0.0123 | 0.0365 MAF1       | MAF1 homolog, negative regulator of RNA poi     | Multiple_Complex |
| TC0200014345.hg.1    | 5.1   | 4.6   | 1.42  | 0.0123 | 0.0366 ANKRD30B   | ankyrin repeat domain 30B-like                  | Multiple_Complex |
| TC0100014752.hg.1    | 11.38 | 10.87 | 1.43  | 0.0123 | 0.0366 GNG5       | guanine nucleotide binding protein (G protein   | Multiple_Complex |
| TC1500009263.hg.1    | 6.38  | 7.31  | -1.91 | 0.0123 | 0.0366 PATL2      | protein associated with topoisomerase II hom    | Multiple_Complex |
| TSUnmapped00000098.h | 5.52  | 5.08  | 1.35  | 0.0124 | 0.0367 DGKD       | diacylglycerol kinase, delta 130kDa             | Coding           |
| TC0X00008365.hg.1    | 4     | 3.62  | 1.3   | 0.0124 | 0.0367 PRR32      | proline rich 32                                 | Coding           |
| TC0700011865.hg.1    | 3.51  | 3.3   | 1.16  | 0.0124 | 0.0367 DLX5       | distal-less homeobox 5                          | Multiple_Complex |
| TC0300006994.hg.1    | 4.15  | 3.75  | 1.32  | 0.0124 | 0.0367 FBXL2      | F-box and leucine-rich repeat protein 2         | Multiple_Complex |
| TC0700009329.hg.1    | 6.65  | 5.99  | 1.58  | 0.0124 | 0.0368 TTC26      | tetratricopeptide repeat domain 26              | Multiple_Complex |
| TC1400007445.hg.1    | 6.61  | 7.12  | -1.42 | 0.0124 | 0.0368 PLEKHG3    | pleckstrin homology domain containing, famil    | Multiple_Complex |
| TC0800009433.hg.1    | 9.73  | 7.47  | 4.79  | 0.0124 | 0.0368 DEFA4      | defensin, alpha 4, corticostatin                | Coding           |
| TC1700008566.hg.1    | 7.01  | 6.57  | 1.36  | 0.0124 | 0.0368 MAP3K3     | mitogen-activated protein kinase kinase kinas   | Multiple_Complex |
| TC1100010809.hg.1    | 4.54  | 4.27  | 1.21  | 0.0124 | 0.0368 OR4C12     | olfactory receptor, family 4, subfamily C, merr | Coding           |
| TSUnmapped00000310.h | 5.88  | 6.33  | -1.36 | 0.0124 | 0.0368 HYOU1      | hypoxia up-regulated 1                          | Coding           |
| TC0100012849.hg.1    | 7.42  | 7.86  | -1.36 | 0.0124 | 0.0368 CAS21      | castor zinc finger 1                            | Multiple_Complex |
| TC0800011211.hg.1    | 6.21  | 7.31  | -2.14 | 0.0124 | 0.0369 NIPAL2     | NIPA-like domain containing 2                   | Multiple_Complex |
| TC1000012471.hg.1    | 4.44  | 4.83  | -1.31 | 0.0125 | 0.037 ADIRF; AGA  | adipogenesis regulatory factor; ankyrin repeat  | Multiple_Complex |
| TC1100010718.hg.1    | 4.54  | 3.91  | 1.54  | 0.0125 | 0.037 LRP4        | LDL receptor related protein 4                  | Multiple_Complex |
| TC0100015509.hg.1    | 5.66  | 6.51  | -1.79 | 0.0125 | 0.037 FAM72B      | family with sequence similarity 72, member B    | Multiple_Complex |
| TC1900011743.hg.1    | 7.34  | 6.59  | 1.68  | 0.0125 | 0.037 TMEM91      | transmembrane protein 91                        | Multiple_Complex |
| TC1700011045.hg.1    | 8.41  | 8.91  | -1.41 | 0.0125 | 0.037 PHB         | prohibitin                                      | Multiple_Complex |
| TC0100009715.hg.1    | 10.33 | 10.72 | -1.31 | 0.0125 | 0.0371 PPIAL4F    | peptidylprolyl isomerase A (cyclophilin A)-like | Coding           |
| TC1000011652.hg.1    | 8.2   | 8.52  | -1.24 | 0.0125 | 0.0371 FBXW4      | F-box and WD repeat domain containing 4         | Multiple_Complex |
| TC0200013001.hg.1    | 4.99  | 5.5   | -1.43 | 0.0125 | 0.0371 ADD2       | adducin 2 (beta)                                | Multiple_Complex |
| TC1900007619.hg.1    | 5.65  | 6.08  | -1.34 | 0.0125 | 0.0371 ZNF726; ZN | zinc finger protein 726; zinc finger protein 92 | Multiple_Complex |
| TC0600008991.hg.1    | 5.75  | 6.36  | -1.53 | 0.0125 | 0.0372 QRSL1      | Transcript Identified by AceView, Entrez Gene   | Unassigned       |
| TC1100006644.hg.1    | 8.57  | 9.29  | -1.64 | 0.0126 | 0.0372 RRM1       | ribonucleotide reductase M1                     | Multiple_Complex |
| TC1700009372.hg.1    | 9.79  | 9.11  | 1.6   | 0.0126 | 0.0372 CRK        | v-crk avian sarcoma virus CT10 oncogene hor     | Multiple_Complex |
| TC0500013207.hg.1    | 3.63  | 4.72  | -2.13 | 0.0126 | 0.0372 LIX1       | Memczak2013 ANTISENSE, coding, INTERNAL,        | NonCoding        |
| TC1200006838.hg.1    | 4.5   | 4.92  | -1.34 | 0.0126 | 0.0373 SMIM10L1   | small integral membrane protein 10 like 1       | Multiple_Complex |
| TC1000008309.hg.1    | 4.77  | 4.71  | 1.04  | 0.0126 | 0.0373 OPN4       | opsin 4                                         | Multiple_Complex |
| TC1400010707.hg.1    | 6.73  | 7.22  | -1.41 | 0.0126 | 0.0373 KIAA0125   | KIAA0125                                        | Multiple_Complex |
| TC0100007191.hg.1    | 5.79  | 5.32  | 1.39  | 0.0126 | 0.0373 PLA2G2F    | phospholipase A2, group IIF                     | Multiple_Complex |
| TC1600010616.hg.1    | 5.39  | 5.9   | -1.42 | 0.0126 | 0.0373 TRADD      | TNFRSF1A-associated via death domain            | Multiple_Complex |
| TC1500006890.hg.1    | 4.38  | 3.94  | 1.35  | 0.0126 | 0.0373 TMC05A     | transmembrane and coiled-coil domains 5A        | Multiple_Complex |
| TC1800007682.hg.1    | 4.82  | 4.45  | 1.29  | 0.0126 | 0.0374 CNDP1      | carnosine dipeptidase 1 (metallopeptidase M     | Multiple_Complex |
| TC0200015894.hg.1    | 6.68  | 7.11  | -1.34 | 0.0126 | 0.0374 DOCK10     | Transcript Identified by AceView, Entrez Gene   | Unassigned       |
| TSUnmapped00000313.h | 6.72  | 7.36  | -1.56 | 0.0126 | 0.0374 CCDC84     | coiled-coil domain containing 84                | NonCoding        |
| TC1400010563.hg.1    | 4.48  | 5.06  | -1.5  | 0.0126 | 0.0374 MIR5195; M | microRNA 5195; immunoglobulin heavy variat      | Multiple_Complex |
| TC1100010015.hg.1    | 4.68  | 4.39  | 1.22  | 0.0126 | 0.0374 NLRP10     | NLR family, pyrin domain containing 10          | Coding           |
| TC2000009748.hg.1    | 5.4   | 5.86  | -1.37 | 0.0127 | 0.0374 CABLES2    | Cdk5 and Abl enzyme substrate 2                 | Multiple_Complex |
| TC1300009488.hg.1    | 4.09  | 3.78  | 1.24  | 0.0127 | 0.0374 DCT        | dopachrome tautomerase                          | Multiple_Complex |
| TC1900010631.hg.1    | 6.6   | 7.03  | -1.35 | 0.0127 | 0.0375 RINL       | Ras and Rab interactor like                     | Multiple_Complex |
| TC1000011005.hg.1    | 7     | 6.53  | 1.39  | 0.0127 | 0.0375 P4HA1      | prolyl 4-hydroxylase, alpha polypeptide I       | Multiple_Complex |
| TC0800006837.hg.1    | 4.82  | 4.36  | 1.37  | 0.0127 | 0.0375 TUSC3      | tumor suppressor candidate 3                    | Multiple_Complex |
| TC0700010789.hg.1    | 4.6   | 4.32  | 1.21  | 0.0127 | 0.0375 AMPH       | amphiphysin                                     | Multiple_Complex |
| TC1200007510.hg.1    | 4.39  | 3.92  | 1.39  | 0.0127 | 0.0375 CCDC184    | coiled-coil domain containing 184               | Coding           |
| TC0300013687.hg.1    | 4.84  | 4.29  | 1.46  | 0.0127 | 0.0375 TFRC       | Transcript Identified by AceView, Entrez Gene   | Unassigned       |
| TC1200009972.hg.1    | 4.66  | 5.05  | -1.31 | 0.0127 | 0.0375 GPR19      | G protein-coupled receptor 19                   | Multiple_Complex |
| TC0200011419.hg.1    | 7.4   | 6.77  | 1.55  | 0.0127 | 0.0376 ATG4B      | autophagy related 4B, cysteine peptidase        | Multiple_Complex |
| TC0300012815.hg.1    | 11.33 | 12.04 | -1.64 | 0.0128 | 0.0376 P2RY13     | purinergic receptor P2Y, G-protein coupled, 1:  | Coding           |
| TC0900007069.hg.1    | 4.67  | 4.25  | 1.34  | 0.0128 | 0.0376 C9orf131   | chromosome 9 open reading frame 131             | Coding           |
| TC1000011799.hg.1    | 3.54  | 4.16  | -1.54 | 0.0128 | 0.0377 XPNPEP1    | Transcript Identified by AceView, Entrez Gene   | Unassigned       |
| TC0600010064.hg.1    | 5.44  | 4.85  | 1.5   | 0.0128 | 0.0378 MAS1       | MAS1 proto-oncogene, G protein-coupled rec      | Coding           |
| TC0400011749.hg.1    | 5.8   | 6.22  | -1.34 | 0.0128 | 0.0378 BBS7       | Bardet-Biedl syndrome 7                         | Multiple_Complex |
| TC0X00011334.hg.1    | 6.82  | 7.42  | -1.51 | 0.0128 | 0.0378 BRCC3      | BRCA1/BRCA2-containing complex subunit 3        | Multiple_Complex |
| TC0400011823.hg.1    | 9.07  | 9.74  | -1.58 | 0.0128 | 0.0378 PGRMC2     | progesterone receptor membrane component        | Multiple_Complex |
| TC0700012695.hg.1    | 9.01  | 9.73  | -1.64 | 0.0128 | 0.0379 C7orf49    | chromosome 7 open reading frame 49              | Multiple_Complex |
| TC0X00007686.hg.1    | 6.1   | 5.5   | 1.51  | 0.0128 | 0.0379 PBDC1      | polysaccharide biosynthesis domain containin    | Multiple_Complex |

|                      |       |       |       |        |                   |                                                    |                  |
|----------------------|-------|-------|-------|--------|-------------------|----------------------------------------------------|------------------|
| TC0100018311.hg.1    | 5.61  | 5.36  | 1.19  | 0.0128 | 0.0379 NOS1AP     | nitric oxide synthase 1 (neuronal) adaptor pro     | Multiple_Complex |
| TC0100018551.hg.1    | 4.62  | 4.23  | 1.31  | 0.0128 | 0.0379 CHIT1      | chitinase 1 (chitotriosidase)                      | Multiple_Complex |
| TC0900010796.hg.1    | 4.41  | 3.98  | 1.35  | 0.0129 | 0.0379 OMD        | osteomodulin                                       | Coding           |
| TC1200012043.hg.1    | 13.24 | 12.57 | 1.59  | 0.0129 | 0.0379 MED13L     | mediator complex subunit 13-like                   | Multiple_Complex |
| TSUnmapped00000421.h | 6.19  | 6.69  | -1.42 | 0.0129 | 0.0379 ATG16L1    | autophagy related 16-like 1                        | Coding           |
| TC0100015186.hg.1    | 4.62  | 4.15  | 1.39  | 0.0129 | 0.0379 C1orf194   | chromosome 1 open reading frame 194                | Multiple_Complex |
| TC1000008382.hg.1    | 7.5   | 6.79  | 1.63  | 0.0129 | 0.0379 LIPN       | lipase, family member N                            | Coding           |
| TC1500008796.hg.1    | 5.36  | 5.87  | -1.42 | 0.0129 | 0.0379 HERC2      | HECT and RLD domain containing E3 ubiquitin        | Multiple_Complex |
| TC1900010531.hg.1    | 6.88  | 7.2   | -1.25 | 0.0129 | 0.0379 ZNF461     | zinc finger protein 461                            | Multiple_Complex |
| TC1500007163.hg.1    | 8.28  | 8.7   | -1.34 | 0.0129 | 0.0379 DUT        | deoxyuridine triphosphatase                        | Multiple_Complex |
| TC0100006781.hg.1    | 5.46  | 4.83  | 1.56  | 0.0129 | 0.0379 SLC25A33   | solute carrier family 25 (pyrimidine nucleotide    | Multiple_Complex |
| TC2000008515.hg.1    | 5.98  | 6.95  | -1.96 | 0.0129 | 0.0379 SNX5       | Jeck2013 ALT_DONOR, coding, INTERNAL, intr         | NonCoding        |
| TC1700009236.hg.1    | 10.11 | 9.39  | 1.64  | 0.0129 | 0.0379 SLC16A3; N | solute carrier family 16 (monocarboxylate trar     | Multiple_Complex |
| TC0600011957.hg.1    | 5.66  | 5.2   | 1.37  | 0.0129 | 0.0379 ADGRF1     | adhesion G protein-coupled receptor F1             | Multiple_Complex |
| TC2000009017.hg.1    | 5.07  | 5.48  | -1.33 | 0.0129 | 0.0379 SOGA1      | suppressor of glucose, autophagy associated ;      | Multiple_Complex |
| TC1100007414.hg.1    | 4.66  | 4.27  | 1.32  | 0.0129 | 0.0379 LOC399886  | uncharacterized LOC399886; Transcript Ident        | Multiple_Complex |
| TC0100018081.hg.1    | 3.9   | 4.25  | -1.28 | 0.0129 | 0.0379 ZNF670; ZN | zinc finger protein 670; zinc finger protein 695   | Multiple_Complex |
| TC1700012482.hg.1    | 5.87  | 5.51  | 1.29  | 0.0129 | 0.0379 SIRT7      | sirtuin 7                                          | Multiple_Complex |
| TC0800011216.hg.1    | 9.2   | 8.33  | 1.83  | 0.0129 | 0.0379 STK3       | serine/threonine kinase 3                          | Multiple_Complex |
| TC0600014112.hg.1    | 4.4   | 4.68  | -1.22 | 0.0129 | 0.0379 ZBTB9      | zinc finger and BTB domain containing 9            | Multiple_Complex |
| TC0100010016.hg.1    | 6.36  | 5.9   | 1.37  | 0.0129 | 0.038 SPRR4       | small proline-rich protein 4                       | Coding           |
| TC1100010851.hg.1    | 4.54  | 4.11  | 1.34  | 0.0129 | 0.038 OR8H1       | olfactory receptor, family 8, subfamily H, men     | Coding           |
| TC0100011901.hg.1    | 7.31  | 6.79  | 1.43  | 0.0129 | 0.038 RAB4A; SP   | RAB4A, member RAS oncogene family; S-phas          | Multiple_Complex |
| TSUnmapped00000363.h | 8.59  | 9.18  | -1.5  | 0.0129 | 0.038 EIF3F       | Eukaryotic translation initiation factor 3 subur   | Coding           |
| TC2000010002.hg.1    | 8.53  | 8.82  | -1.23 | 0.0129 | 0.038 NCOA6       | nuclear receptor coactivator 6                     | Multiple_Complex |
| TC0100014794.hg.1    | 7.21  | 7.81  | -1.52 | 0.013  | 0.0381 ODF2L      | outer dense fiber of sperm tails 2-like            | Multiple_Complex |
| TC1700009032.hg.1    | 7.28  | 7.69  | -1.33 | 0.013  | 0.0381 TNRC6C     | trinucleotide repeat containing 6C                 | Multiple_Complex |
| TC2100008251.hg.1    | 4.46  | 4.19  | 1.21  | 0.013  | 0.0382 TFF1       | trefoil factor 1                                   | Multiple_Complex |
| TC1400008116.hg.1    | 7.05  | 6.29  | 1.7   | 0.013  | 0.0382 GSKIP      | GSK3B interacting protein                          | Multiple_Complex |
| TC0600012428.hg.1    | 6.48  | 6.93  | -1.36 | 0.0131 | 0.0383 UBE3D      | ubiquitin protein ligase E3D                       | Multiple_Complex |
| TC1300008449.hg.1    | 5.73  | 5.2   | 1.44  | 0.0131 | 0.0383 CDX2       | caudal type homeobox 2                             | Multiple_Complex |
| TC1200008005.hg.1    | 10.96 | 10.18 | 1.72  | 0.0131 | 0.0384 RASSF3     | Ras association (RalGDS/AF-6) domain family        | Multiple_Complex |
| TC0600007610.hg.1    | 4.95  | 5.47  | -1.43 | 0.0131 | 0.0384 MSH5; MSH  | mutS homolog 5; MSH5-SAPCD1 readthrough            | Multiple_Complex |
| TSUnmapped00000395.h | 7.15  | 6.8   | 1.27  | 0.0131 | 0.0384 ATG16L1    | autophagy related 16-like 1                        | Coding           |
| TC0100016709.hg.1    | 9.24  | 8.77  | 1.38  | 0.0131 | 0.0384 TPR        | translocated promoter region, nuclear basket       | Multiple_Complex |
| TC1400008762.hg.1    | 5.33  | 4.67  | 1.58  | 0.0131 | 0.0384 CTSG       | cathepsin G                                        | Multiple_Complex |
| TC0500010203.hg.1    | 5.15  | 4.66  | 1.41  | 0.0131 | 0.0384 MYO10      | myosin X                                           | Multiple_Complex |
| TC1900011665.hg.1    | 5.28  | 4.77  | 1.42  | 0.0131 | 0.0384 ZNF627     | zinc finger protein 627                            | NonCoding        |
| TC2000008351.hg.1    | 5.98  | 5.33  | 1.58  | 0.0131 | 0.0385 PLCB1      | Memczak2013 ANTISENSE, coding, INTERNAL, NonCoding | NonCoding        |
| TC2000009128.hg.1    | 5.53  | 5.93  | -1.31 | 0.0131 | 0.0385 ZHX3       | zinc fingers and homeoboxes 3                      | Multiple_Complex |
| TC0400006798.hg.1    | 5.44  | 4.82  | 1.53  | 0.0131 | 0.0385 USP17L17   | ubiquitin specific peptidase 17-like family mer    | Coding           |
| TC1100010271.hg.1    | 7.03  | 7.56  | -1.44 | 0.0131 | 0.0385 UEVLD      | UEV and lactate/malate dehydrogenase domain        | Multiple_Complex |
| TC0600008071.hg.1    | 5.87  | 5.41  | 1.37  | 0.0132 | 0.0386 PTK7       | protein tyrosine kinase 7 (inactive)               | Multiple_Complex |
| TC0100010381.hg.1    | 7.48  | 6.93  | 1.47  | 0.0132 | 0.0386 UAP1       | UDP-N-acetylglucosamine pyrophosphorylase          | Multiple_Complex |
| TC0200015578.hg.1    | 8.03  | 7.35  | 1.6   | 0.0132 | 0.0386 IDH1       | isocitrate dehydrogenase 1 (NADP+)                 | Multiple_Complex |
| TC0100011203.hg.1    | 9.26  | 10.08 | -1.77 | 0.0132 | 0.0386 RNPEP      | arginyl aminopeptidase (aminopeptidase B)          | Multiple_Complex |
| TC1300008249.hg.1    | 4.43  | 4.02  | 1.33  | 0.0132 | 0.0386 GJB2       | gap junction protein beta 2                        | Coding           |
| TC1900011834.hg.1    | 7.94  | 8.37  | -1.34 | 0.0132 | 0.0387 C19orf25   | chromosome 19 open reading frame 25                | Multiple_Complex |
| TC2100006883.hg.1    | 4.35  | 3.69  | 1.58  | 0.0132 | 0.0387 KRTAP20-3  | keratin associated protein 20-3                    | Coding           |
| TC1600010636.hg.1    | 5.16  | 4.85  | 1.24  | 0.0132 | 0.0387 AGRP       | agouti related neuropeptide                        | Coding           |
| TC0500009606.hg.1    | 7.36  | 7.79  | -1.34 | 0.0132 | 0.0387 ZNF346     | zinc finger protein 346                            | Multiple_Complex |
| TC0200016348.hg.1    | 5.4   | 4.54  | 1.83  | 0.0132 | 0.0387 HDLBP      | Transcript Identified by AceView, Entrez Gene      | Unassigned       |
| TC1100006546.hg.1    | 5.46  | 4.94  | 1.43  | 0.0132 | 0.0388 TNNT3      | troponin T type 3 (skeletal, fast)                 | Multiple_Complex |
| TC1600006789.hg.1    | 4.64  | 4.04  | 1.51  | 0.0132 | 0.0388 A2BP1      | Transcript Identified by AceView, Entrez Gene      | Unassigned       |
| TC0900009417.hg.1    | 8.93  | 9.79  | -1.82 | 0.0133 | 0.0388 RFX3       | Memczak2013 ALT_ACCEPTOR, ALT_DONOR, NonCoding     | NonCoding        |
| TC0400007096.hg.1    | 7.02  | 7.54  | -1.43 | 0.0133 | 0.0388 ANAPC4     | anaphase promoting complex subunit 4               | Multiple_Complex |
| TC0200016309.hg.1    | 4.36  | 4.68  | -1.25 | 0.0133 | 0.0388 OTOS       | otospiralin                                        | Coding           |
| TC1600009883.hg.1    | 8.32  | 8.72  | -1.31 | 0.0133 | 0.0388 TUFM; MIR  | Tu translation elongation factor, mitochondria     | Multiple_Complex |
| TC0200016000.hg.1    | 4.67  | 5.11  | -1.36 | 0.0133 | 0.0389 GPR55      | G protein-coupled receptor 55                      | Multiple_Complex |
| TC0800007846.hg.1    | 4.61  | 4.06  | 1.46  | 0.0133 | 0.0389 DNAJC5B    | DnaJ (Hsp40) homolog, subfamily C, member          | Multiple_Complex |
| TC0100006881.hg.1    | 13.98 | 14.72 | -1.67 | 0.0133 | 0.0389 TNFRSF1B;  | tumor necrosis factor receptor superfamily, m      | Multiple_Complex |
| TC1100010187.hg.1    | 6.52  | 5.95  | 1.48  | 0.0133 | 0.0389 CALCA      | calcitonin-related polypeptide alpha               | Multiple_Complex |
| TC1300008552.hg.1    | 4.52  | 4     | 1.44  | 0.0133 | 0.0389 ZAR1L      | zygote arrest 1-like                               | Coding           |
| TC1200009705.hg.1    | 6.2   | 5.75  | 1.37  | 0.0133 | 0.0389 VWF        | von Willebrand factor                              | Multiple_Complex |
| TC0200007155.hg.1    | 6.75  | 5.98  | 1.7   | 0.0133 | 0.039 EHD3        | EH domain containing 3                             | Coding           |
| TC0300013906.hg.1    | 4.43  | 4.15  | 1.22  | 0.0133 | 0.039 KCNMB2      | potassium channel subfamily M regulatory be        | Multiple_Complex |
| TC0200011753.hg.1    | 4.74  | 5.03  | -1.22 | 0.0133 | 0.039 E2F6        | E2F transcription factor 6                         | Multiple_Complex |
| TC1400006540.hg.1    | 13.97 | 12.32 | 3.14  | 0.0134 | 0.0391 RNASE2     | ribonuclease, RNase A family, 2 (liver, eosinop    | Coding           |
| TC1700012287.hg.1    | 10.91 | 10.55 | 1.28  | 0.0134 | 0.0391 RPS6KB1    | ribosomal protein S6 kinase, 70kDa, polypepti      | Multiple_Complex |
| TC1400008677.hg.1    | 8.76  | 9.43  | -1.59 | 0.0134 | 0.0392 SLC7A7     | solute carrier family 7 (amino acid transporter    | Multiple_Complex |

|                      |       |       |       |        |        |            |                                                  |                  |
|----------------------|-------|-------|-------|--------|--------|------------|--------------------------------------------------|------------------|
| TC1700009627.hg.1    | 4.97  | 4.68  | 1.22  | 0.0134 | 0.0392 | YBX2       | Y box binding protein 2                          | Multiple_Complex |
| TC0100009191.hg.1    | 6.58  | 7.35  | -1.71 | 0.0134 | 0.0392 | AGL        | amylase, alpha-1, 6-glucosidase, 4-alpha-glucan  | Multiple_Complex |
| TC0200011548.hg.1    | 6.39  | 6.96  | -1.48 | 0.0134 | 0.0392 | TSSC1      | tumor suppressing subtransferable candidate      | Multiple_Complex |
| TC0700013467.hg.1    | 4.1   | 4.58  | -1.4  | 0.0134 | 0.0392 | ADCK2      | aarF domain containing kinase 2                  | Multiple_Complex |
| TC0700010345.hg.1    | 4.5   | 4.05  | 1.37  | 0.0134 | 0.0392 | ISPD       | isoprenoid synthase domain containing            | Multiple_Complex |
| TC2200008112.hg.1    | 6.45  | 6.99  | -1.46 | 0.0134 | 0.0392 | TOP3B      | topoisomerase (DNA) III beta                     | Multiple_Complex |
| TC1700010433.hg.1    | 5.37  | 4.56  | 1.75  | 0.0135 | 0.0393 | SLFN14     | schlafen family member 14                        | Coding           |
| TC0100018519.hg.1    | 11.52 | 10.96 | 1.48  | 0.0135 | 0.0393 | F11R       | F11 receptor                                     | Multiple_Complex |
| TC1500010864.hg.1    | 5.26  | 5.85  | -1.51 | 0.0135 | 0.0394 | GATM       | glycine amidinotransferase (L-arginine:glycine   | Multiple_Complex |
| TC0200012074.hg.1    | 5.69  | 6.26  | -1.49 | 0.0135 | 0.0394 | EIF2B4     | eukaryotic translation initiation factor 2B, sub | Multiple_Complex |
| TSUnmapped00000321.h | 7.96  | 7.1   | 1.82  | 0.0135 | 0.0394 | RPS25      | ribosomal protein S25                            | Coding           |
| TSUnmapped00000080.h | 6.51  | 6.71  | -1.15 | 0.0135 | 0.0394 | ATG16L1    | autophagy related 16-like 1                      | NonCoding        |
| TC1200008685.hg.1    | 8.89  | 8.18  | 1.64  | 0.0135 | 0.0394 | CHST11     | Transcript Identified by AceView, Entrez Gene    | Unassigned       |
| TC2100007796.hg.1    | 5.14  | 5.61  | -1.39 | 0.0135 | 0.0395 | MRPL39     | mitochondrial ribosomal protein L39              | Multiple_Complex |
| TC0400008391.hg.1    | 5.59  | 5.1   | 1.41  | 0.0136 | 0.0395 | EGF        | epidermal growth factor                          | Multiple_Complex |
| TC0900010800.hg.1    | 4.99  | 4.49  | 1.42  | 0.0136 | 0.0395 | ECM2       | extracellular matrix protein 2, female organ ar  | Coding           |
| TC1000011081.hg.1    | 5.44  | 5.03  | 1.32  | 0.0136 | 0.0396 | ZNF503     | zinc finger protein 503                          | Multiple_Complex |
| TC0500012979.hg.1    | 9.44  | 9.84  | -1.32 | 0.0136 | 0.0397 | DDX41      | DEAD (Asp-Glu-Ala-Asp) box polypeptide 41        | Multiple_Complex |
| TC0100014612.hg.1    | 5.17  | 5.66  | -1.41 | 0.0136 | 0.0397 | CRYZ       | crystallin zeta                                  | Multiple_Complex |
| TC1200011002.hg.1    | 4.11  | 3.71  | 1.32  | 0.0136 | 0.0397 | LRIG3      | leucine-rich repeats and immunoglobulin-like     | Multiple_Complex |
| TC0200016447.hg.1    | 5.59  | 5.94  | -1.27 | 0.0136 | 0.0397 | ACYP2      | acylphosphatase 2, muscle type                   | Multiple_Complex |
| TC0700012159.hg.1    | 5.2   | 4.56  | 1.56  | 0.0137 | 0.0398 | PUS7       | pseudouridylate synthase 7 (putative)            | Multiple_Complex |
| TC1800008399.hg.1    | 5.42  | 5.12  | 1.23  | 0.0137 | 0.0398 | B4GALT6    | UDP-Gal:betaGlcNAc beta 1,4- galactosyltrans     | Multiple_Complex |
| TC0800011206.hg.1    | 14.34 | 12.51 | 3.53  | 0.0137 | 0.0398 | RPL30      | ribosomal protein L30                            | Multiple_Complex |
| TC0200009539.hg.1    | 14    | 12.82 | 2.27  | 0.0137 | 0.0398 | ARHGAP15   | Rho GTPase activating protein 15                 | Multiple_Complex |
| TC0700009082.hg.1    | 5.26  | 4.87  | 1.31  | 0.0137 | 0.0399 | SMO        | smoothened, frizzled class receptor              | Multiple_Complex |
| TC1900011786.hg.1    | 8.39  | 8.08  | 1.24  | 0.0137 | 0.0399 | NR1H2      | nuclear receptor subfamily 1, group H, memb      | Multiple_Complex |
| TC0800011395.hg.1    | 5.14  | 4.57  | 1.49  | 0.0137 | 0.0399 | LRP12      | LDL receptor related protein 12                  | Multiple_Complex |
| TC0X00010099.hg.1    | 6.75  | 7.47  | -1.65 | 0.0137 | 0.0399 | ABCB7      | ATP binding cassette subfamily B member 7        | Multiple_Complex |
| TC1900012050.hg.1    | 9.41  | 10.07 | -1.59 | 0.0138 | 0.04   | PPP6R1     | protein phosphatase 6, regulatory subunit 1      | Multiple_Complex |
| TC0X00010406.hg.1    | 4.57  | 4.16  | 1.33  | 0.0138 | 0.04   | TCEAL8     | transcription elongation factor A (SII)-like 8   | Multiple_Complex |
| TC0400011650.hg.1    | 4.38  | 3.9   | 1.4   | 0.0138 | 0.04   | ARSL       | arylsulfatase family, member J                   | Multiple_Complex |
| TC0800009468.hg.1    | 5.73  | 5.32  | 1.33  | 0.0138 | 0.0401 | DEFB106B   | defensin, beta 106B; defensin, beta 106A         | Coding           |
| TC0500010999.hg.1    | 8.55  | 8.17  | 1.3   | 0.0138 | 0.0401 | TAF9; AK6  | TAF9 RNA polymerase II, TATA box binding pr      | Multiple_Complex |
| TC1500009452.hg.1    | 7.49  | 6.89  | 1.51  | 0.0138 | 0.0401 | GNB5       | guanine nucleotide binding protein (G protein    | Multiple_Complex |
| TC1900009311.hg.1    | 3.62  | 3.32  | 1.23  | 0.0138 | 0.0401 | ZFR2       | zinc finger RNA binding protein 2                | Multiple_Complex |
| TC0100011004.hg.1    | 4.46  | 3.94  | 1.44  | 0.0138 | 0.0401 | RGS21      | regulator of G-protein signaling 21              | Coding           |
| TC0200007053.hg.1    | 7.27  | 7.71  | -1.35 | 0.0138 | 0.0401 | KHK        | ketoheokinase                                    | Multiple_Complex |
| TC0200013332.hg.1    | 7.85  | 8.29  | -1.36 | 0.0138 | 0.0401 | PLGLB1     | Transcript Identified by AceView, Entrez Gene    | Unassigned       |
| TC0200007174.hg.1    | 9.63  | 8.89  | 1.66  | 0.0138 | 0.0402 | SPAST      | spastin                                          | Multiple_Complex |
| TC0600006653.hg.1    | 8.27  | 8.69  | -1.33 | 0.0138 | 0.0402 | RIPK1      | receptor (TNFRSF)-interacting serine-threonin    | Multiple_Complex |
| TC0X00008830.hg.1    | 9.65  | 9.07  | 1.49  | 0.0139 | 0.0402 | TAZ        | tafazzin                                         | Multiple_Complex |
| TC1400010574.hg.1    | 6.18  | 5.72  | 1.37  | 0.0139 | 0.0402 | BCL2L2-PAI | BCL2L2-PABPN1 readthrough                        | Multiple_Complex |
| TC0500011435.hg.1    | 8.79  | 9.44  | -1.57 | 0.0139 | 0.0403 | LYSMD3     | LysM, putative peptidoglycan-binding, domai      | Multiple_Complex |
| TC1900010783.hg.1    | 6.93  | 6.54  | 1.31  | 0.0139 | 0.0403 | GRIK5      | glutamate receptor, ionotropic, kainate 5        | Multiple_Complex |
| TC0100009181.hg.1    | 3.77  | 3.52  | 1.19  | 0.0139 | 0.0403 | PLPPR4     | phospholipid phosphatase related 4               | Multiple_Complex |
| TC1100013225.hg.1    | 3.62  | 3.36  | 1.19  | 0.0139 | 0.0403 | POU2AF1    | POU class 2 associating factor 1                 | Multiple_Complex |
| TC1200007653.hg.1    | 6.42  | 5.98  | 1.35  | 0.0139 | 0.0403 | NR4A1      | nuclear receptor subfamily 4, group A, memb      | Multiple_Complex |
| TC0200009973.hg.1    | 8.18  | 9     | -1.76 | 0.0139 | 0.0404 | ITGA6      | integrin alpha 6                                 | Multiple_Complex |
| TC2000009953.hg.1    | 12.9  | 12.5  | 1.32  | 0.0139 | 0.0404 | OSBPL2     | oxysterol binding protein-like 2                 | Multiple_Complex |
| TC0500013149.hg.1    | 6.47  | 6.91  | -1.35 | 0.0139 | 0.0404 | SRD5A1     | steroid-5-alpha-reductase, alpha polypeptide     | Multiple_Complex |
| TC0600009886.hg.1    | 3.94  | 3.35  | 1.51  | 0.0139 | 0.0404 | VIP        | vasoactive intestinal peptide                    | Coding           |
| TC2200006678.hg.1    | 9.24  | 10.03 | -1.72 | 0.014  | 0.0405 | SNAP29     | synaptosome associated protein 29kDa             | Multiple_Complex |
| TC0X00010141.hg.1    | 8.75  | 9.53  | -1.72 | 0.014  | 0.0405 | CYSLTR1    | cysteinyl leukotriene receptor 1                 | Multiple_Complex |
| TC1000009155.hg.1    | 5.24  | 4.84  | 1.32  | 0.014  | 0.0405 | DMBT1      | deleted in malignant brain tumors 1              | Multiple_Complex |
| TC0100010858.hg.1    | 9.46  | 8.93  | 1.44  | 0.014  | 0.0405 | DHX9       | DEAH (Asp-Glu-Ala-His) box helicase 9            | Multiple_Complex |
| TC1900007809.hg.1    | 9.35  | 9.81  | -1.38 | 0.014  | 0.0405 | UBA2       | ubiquitin-like modifier activating enzyme 2      | Multiple_Complex |
| TC0600010343.hg.1    | 8.63  | 8.99  | -1.29 | 0.014  | 0.0406 | TBP        | TATA box binding protein                         | Multiple_Complex |
| TC0100018479.hg.1    | 12.58 | 11.94 | 1.56  | 0.0141 | 0.0408 | NOTCH2NL   | notch 2 N-terminal like                          | Multiple_Complex |
| TC0600011304.hg.1    | 4.94  | 4.6   | 1.27  | 0.0141 | 0.0408 | OR12D3     | olfactory receptor, family 12, subfamily D, me   | Coding           |
| TC1600010955.hg.1    | 4.57  | 4.07  | 1.42  | 0.0141 | 0.0408 | MAFTRR     | MAF transcriptional regulator RNA                | Multiple_Complex |
| TC0300010310.hg.1    | 14.37 | 13.06 | 2.47  | 0.0141 | 0.0408 | RPL32; SNC | ribosomal protein L32; small nucleolar RNA, H    | Multiple_Complex |
| TC0800009833.hg.1    | 4.8   | 4.47  | 1.26  | 0.0141 | 0.0408 | PHYHIP     | phytanoyl-CoA 2-hydroxylase interacting prot     | Multiple_Complex |
| TC2000008666.hg.1    | 8.28  | 7.95  | 1.26  | 0.0141 | 0.0408 | NAPB       | N-ethylmaleimide-sensitive factor attachment     | Multiple_Complex |
| TC0900010667.hg.1    | 4.23  | 3.77  | 1.38  | 0.0141 | 0.0408 | SPATA31C2  | SPATA31 subfamily C, member 2                    | Multiple_Complex |
| TC0900006782.hg.1    | 7.12  | 7.51  | -1.3  | 0.0141 | 0.0408 | FOCAD      | focadhesin                                       | Multiple_Complex |
| TC0400007785.hg.1    | 4.09  | 3.76  | 1.26  | 0.0141 | 0.0409 | ENAM       | enamelin                                         | Multiple_Complex |
| TC1500009224.hg.1    | 4.13  | 3.69  | 1.36  | 0.0142 | 0.041  | STRC       | stereocilin                                      | Multiple_Complex |
| TC0600009772.hg.1    | 4.76  | 5.12  | -1.28 | 0.0142 | 0.041  | SASH1      | SAM and SH3 domain containing 1                  | Multiple_Complex |
| TSUnmapped00000248.h | 4.72  | 4.49  | 1.17  | 0.0142 | 0.0411 | BCL2L14    | BCL2-like 14 (apoptosis facilitator)             | Coding           |

|                   |       |       |       |        |                   |                                                  |                  |
|-------------------|-------|-------|-------|--------|-------------------|--------------------------------------------------|------------------|
| TC0300013736.hg.1 | 9.9   | 10.43 | -1.45 | 0.0142 | 0.0411 DLG1       | discs, large homolog 1 (Drosophila)              | Multiple_Complex |
| TC1900011762.hg.1 | 7.88  | 7.48  | 1.32  | 0.0142 | 0.0411 APOC2      | apolipoprotein C-II                              | Multiple_Complex |
| TC1900011253.hg.1 | 9.65  | 9.93  | -1.21 | 0.0142 | 0.0411 C19orf84   | chromosome 19 open reading frame 84              | Multiple_Complex |
| TC1400007204.hg.1 | 6.96  | 6.48  | 1.4   | 0.0142 | 0.0412 CGRRF1     | cell growth regulator with ring finger domain    | Multiple_Complex |
| TC1900009196.hg.1 | 6.3   | 5.93  | 1.29  | 0.0142 | 0.0412 CSNK1G2-A  | CSNK1G2 antisense RNA 1                          | Multiple_Complex |
| TC0900008415.hg.1 | 4.5   | 4.07  | 1.35  | 0.0142 | 0.0412 MUSK       | muscle, skeletal, receptor tyrosine kinase       | Coding           |
| TC0100016567.hg.1 | 7.61  | 7     | 1.52  | 0.0143 | 0.0412 TOR1AIP2   | torsin A interacting protein 2                   | Multiple_Complex |
| TC1200007161.hg.1 | 7.73  | 7.34  | 1.31  | 0.0143 | 0.0412 MRPS35     | mitochondrial ribosomal protein S35              | Multiple_Complex |
| TC0200009312.hg.1 | 4.56  | 4.14  | 1.34  | 0.0143 | 0.0413 POTEJ      | POTE ankyrin domain family, member J             | Multiple_Complex |
| TC1100010726.hg.1 | 6.22  | 6.86  | -1.56 | 0.0143 | 0.0413 PACSIN3    | protein kinase C and casein kinase substrate in  | Multiple_Complex |
| TC1200006627.hg.1 | 5.83  | 6.44  | -1.53 | 0.0143 | 0.0413 NCPAD2     | non-SMC condensin I complex subunit D2           | Multiple_Complex |
| TC0600014085.hg.1 | 6.61  | 6.08  | 1.44  | 0.0143 | 0.0414 HIST1H2AH  | histone cluster 1, H2ah                          | Coding           |
| TC0200016771.hg.1 | 5.6   | 5.13  | 1.39  | 0.0143 | 0.0414 TNS1       | tensin 1                                         | NonCoding        |
| TC0900011820.hg.1 | 5.79  | 5.88  | -1.06 | 0.0143 | 0.0414 TSC1       | Transcript Identified by AceView, Entrez Gene    | Unassigned       |
| TC0600010962.hg.1 | 13.99 | 13.29 | 1.62  | 0.0144 | 0.0416 DEK        | DEK proto-oncogene                               | Multiple_Complex |
| TC1100011183.hg.1 | 6.95  | 6.49  | 1.38  | 0.0144 | 0.0416 SF1        | splicing factor 1                                | Multiple_Complex |
| TC0500013225.hg.1 | 6.28  | 6.88  | -1.52 | 0.0144 | 0.0416 CDC42SE2   | CDC42 small effector 2                           | NonCoding        |
| TC1400009002.hg.1 | 8.98  | 8.37  | 1.52  | 0.0144 | 0.0416 SEC23A     | Sec23 homolog A, COPII coat complex compo        | Multiple_Complex |
| TC0100011262.hg.1 | 4.6   | 4.27  | 1.25  | 0.0144 | 0.0416 PRELP      | proline/arginine-rich end leucine-rich repeat f  | Coding           |
| TC2000008802.hg.1 | 5.64  | 5.21  | 1.35  | 0.0144 | 0.0417 DEFB116    | defensin, beta 116                               | Coding           |
| TC1100007637.hg.1 | 5.47  | 4.93  | 1.45  | 0.0145 | 0.0418 OR8U1; OR  | olfactory receptor, family 8, subfamily U, men   | Coding           |
| TC0900009424.hg.1 | 3.72  | 3.6   | 1.09  | 0.0145 | 0.0418 GLIS3      | GLIS family zinc finger 3                        | Multiple_Complex |
| TC1900011812.hg.1 | 5.29  | 5.76  | -1.38 | 0.0145 | 0.0418 ZNF547; TR | zinc finger protein 547; trafficking protein par | Multiple_Complex |
| TC1500010745.hg.1 | 4.99  | 4.62  | 1.29  | 0.0145 | 0.0419 POLR2M     | polymerase (RNA) II (DNA directed) polypeptid    | NonCoding        |
| TC1400008616.hg.1 | 3.71  | 3.44  | 1.21  | 0.0145 | 0.0419 RNASE13    | ribonuclease, RNase A family, 13 (non-active)    | Coding           |
| TC1100009906.hg.1 | 4.84  | 4.37  | 1.38  | 0.0145 | 0.0419 OR52E2     | olfactory receptor, family 52, subfamily E, me   | Coding           |
| TC2000008379.hg.1 | 5.06  | 5.64  | -1.5  | 0.0145 | 0.0419 MKKS       | McKusick-Kaufman syndrome                        | Multiple_Complex |
| TC0800010275.hg.1 | 8.61  | 8.44  | 1.12  | 0.0145 | 0.0419 PLAT       | plasminogen activator, tissue                    | Multiple_Complex |
| TC1700006775.hg.1 | 8.16  | 8.67  | -1.42 | 0.0145 | 0.0419 CHD3       | chromodomain helicase DNA binding protein        | Multiple_Complex |
| TC0100012948.hg.1 | 3.68  | 3.26  | 1.34  | 0.0146 | 0.0419 PRAMEF19   | PRAME family member 19                           | Coding           |
| TC0800009231.hg.1 | 10.85 | 9.83  | 2.02  | 0.0146 | 0.042 GRINA       | glutamate receptor, ionotropic, N-methyl D-as    | Multiple_Complex |
| TC1700009619.hg.1 | 6.89  | 6.49  | 1.31  | 0.0146 | 0.0421 DLG4       | discs, large homolog 4 (Drosophila)              | Multiple_Complex |
| TC1200008792.hg.1 | 4.93  | 5.5   | -1.48 | 0.0146 | 0.0421 UNG        | uracil DNA glycosylase                           | Multiple_Complex |
| TC1700011189.hg.1 | 5.87  | 5.39  | 1.39  | 0.0146 | 0.0421 TMEM100    | transmembrane protein 100                        | Multiple_Complex |
| TC0700009521.hg.1 | 3.84  | 3.5   | 1.26  | 0.0146 | 0.0421 OR2A12     | olfactory receptor, family 2, subfamily A, men   | Coding           |
| TC1200008814.hg.1 | 12.16 | 11.45 | 1.64  | 0.0146 | 0.0421 ANKRD13A   | ankyrin repeat domain 13A                        | Multiple_Complex |
| TC0300011706.hg.1 | 4.61  | 4.02  | 1.51  | 0.0146 | 0.0421 VGLL3      | vestigial-like family member 3                   | Multiple_Complex |
| TC0100018301.hg.1 | 5.97  | 5.58  | 1.31  | 0.0146 | 0.0421 DCST1      | DC-STAMP domain containing 1                     | Multiple_Complex |
| TC1900011929.hg.1 | 4.87  | 5.54  | -1.59 | 0.0147 | 0.0422 IGF1R1     | IGF like family receptor 1                       | Multiple_Complex |
| TC0500012394.hg.1 | 4.19  | 3.53  | 1.58  | 0.0147 | 0.0422 C5orf46    | chromosome 5 open reading frame 46               | Multiple_Complex |
| TC1900007783.hg.1 | 7.49  | 6.86  | 1.55  | 0.0147 | 0.0422 CHST8      | carbohydrate (N-acetyl)galactosamine 4-O) sulf   | Multiple_Complex |
| TC0600007869.hg.1 | 6.81  | 7.6   | -1.73 | 0.0147 | 0.0422 CMTR1      | cap methyltransferase 1                          | Multiple_Complex |
| TC0200009316.hg.1 | 5.72  | 5.35  | 1.29  | 0.0147 | 0.0423 GPR148     | G protein-coupled receptor 148                   | Coding           |
| TC1500009348.hg.1 | 6.19  | 5.52  | 1.6   | 0.0147 | 0.0423 FBN1       | fibrillin 1                                      | Multiple_Complex |
| TC0700012886.hg.1 | 4.8   | 4.5   | 1.23  | 0.0147 | 0.0423 EPHA1      | EPH receptor A1                                  | Multiple_Complex |
| TC1300008048.hg.1 | 4.95  | 4.52  | 1.35  | 0.0147 | 0.0423 TEX29      | testis expressed 29                              | Coding           |
| TC0X00008509.hg.1 | 6.26  | 6.64  | -1.3  | 0.0147 | 0.0423 ZNF449     | zinc finger protein 449                          | Coding           |
| TC1700008907.hg.1 | 5.67  | 6.1   | -1.35 | 0.0148 | 0.0424 TMEM94; †  | transmembrane protein 94; microRNA 6785          | Multiple_Complex |
| TC0300013959.hg.1 | 7.68  | 7.02  | 1.59  | 0.0148 | 0.0424 CCDC13     | coiled-coil domain containing 13                 | Multiple_Complex |
| TC0700008882.hg.1 | 6.1   | 5.45  | 1.57  | 0.0148 | 0.0424 ST7; ST7-O | suppression of tumorigenicity 7; ST7 overlapp    | Multiple_Complex |
| TC1100007457.hg.1 | 8.45  | 7.72  | 1.66  | 0.0148 | 0.0424 ATG13      | autophagy related 13                             | Multiple_Complex |
| TC0600014238.hg.1 | 5.79  | 6.15  | -1.29 | 0.0148 | 0.0425 BLOC1S5    | biogenesis of lysosomal organelles complex-1,    | Multiple_Complex |
| TC2000009555.hg.1 | 5.3   | 4.77  | 1.45  | 0.0148 | 0.0425 GCNT7      | glucosaminyl (N-acetyl) transferase family me    | Coding           |
| TC0100008696.hg.1 | 4.11  | 4.42  | -1.24 | 0.0148 | 0.0426 HHLA3      | HERV-H LTR-associating 3                         | Multiple_Complex |
| TC0200016252.hg.1 | 9.47  | 9.93  | -1.37 | 0.0148 | 0.0426 HDAC4      | histone deacetylase 4                            | Multiple_Complex |
| TC1000011427.hg.1 | 6.03  | 6.66  | -1.55 | 0.0148 | 0.0426 IDE        | insulin-degrading enzyme                         | Multiple_Complex |
| TC1100011367.hg.1 | 9.56  | 10.48 | -1.89 | 0.0149 | 0.0426 UNC93B1    | unc-93 homolog B1 (C. elegans)                   | Multiple_Complex |
| TC0400010048.hg.1 | 6     | 6.35  | -1.27 | 0.0149 | 0.0427 ZNF518B    | zinc finger protein 518B                         | Multiple_Complex |
| TC1900006492.hg.1 | 5.48  | 5.16  | 1.25  | 0.0149 | 0.0427 PRTN3      | proteinase 3                                     | Multiple_Complex |
| TC0700007157.hg.1 | 5.44  | 5.1   | 1.26  | 0.0149 | 0.0427 NPSR1      | neuropeptide 5 receptor 1                        | Multiple_Complex |
| TC0600008505.hg.1 | 4.62  | 4.27  | 1.27  | 0.0149 | 0.0428 RIMS1      | regulating synaptic membrane exocytosis 1        | Multiple_Complex |
| TC0100006548.hg.1 | 3.73  | 3.56  | 1.12  | 0.0149 | 0.0428 GABRD      | gamma-aminobutyric acid (GABA) A receptor,       | Coding           |
| TC2000007114.hg.1 | 7.03  | 6.56  | 1.38  | 0.0149 | 0.0428 KIF3B      | kinesin family member 3B                         | Multiple_Complex |
| TC1900011658.hg.1 | 8.75  | 8.01  | 1.68  | 0.0149 | 0.0428 TRAPPC5    | trafficking protein particle complex 5           | Multiple_Complex |
| TC0600013330.hg.1 | 3.75  | 3.33  | 1.34  | 0.0149 | 0.0429 PBOV1      | prostate and breast cancer overexpressed 1       | Coding           |
| TC1900011826.hg.1 | 4.56  | 4.94  | -1.31 | 0.015  | 0.0429 ZNF544     | zinc finger protein 544                          | Multiple_Complex |
| TC1700010698.hg.1 | 8.05  | 7.54  | 1.43  | 0.015  | 0.0429 CNP        | Memczak2013 ANTISENSE, CDS, coding, INTEF        | NonCoding        |
| TC1200010650.hg.1 | 6.39  | 6.8   | -1.32 | 0.015  | 0.0429 RACGAP1    | Rac GTPase activating protein 1                  | Multiple_Complex |
| TC0500012592.hg.1 | 3.31  | 3.14  | 1.13  | 0.015  | 0.0429 FAM71B     | family with sequence similarity 71, member B     | Coding           |
| TC0600006659.hg.1 | 3.85  | 4.34  | -1.41 | 0.015  | 0.043 BPHL        | biphenyl hydrolase-like (serine hydrolase)       | Multiple_Complex |

|                      |       |       |       |        |                  |                                                  |                  |
|----------------------|-------|-------|-------|--------|------------------|--------------------------------------------------|------------------|
| TC0100010581.hg.1    | 5     | 4.59  | 1.33  | 0.015  | 0.0431 FMO6P     | flavin containing monooxygenase 6 pseudoge       | Multiple_Complex |
| TC0100010365.hg.1    | 7.92  | 8.53  | -1.53 | 0.0151 | 0.0432 FCRLA     | Fc receptor-like A                               | Multiple_Complex |
| TC0300011047.hg.1    | 7.17  | 7.73  | -1.48 | 0.0151 | 0.0432 IMPDH2    | IMP (inosine 5-monophosphate) dehydrogena        | Multiple_Complex |
| TC1200007783.hg.1    | 4.52  | 3.97  | 1.46  | 0.0151 | 0.0433 OR6C74    | olfactory receptor, family 6, subfamily C, merr  | Coding           |
| TC1100012474.hg.1    | 7.22  | 7.91  | -1.61 | 0.0151 | 0.0433 MPZL2     | myelin protein zero-like 2                       | Multiple_Complex |
| TSUnmapped00000660.h | 4.62  | 4.24  | 1.3   | 0.0151 | 0.0433 PRAMEF18  | PRAME family member 18                           | Coding           |
| TC1400008568.hg.1    | 4.18  | 3.74  | 1.35  | 0.0151 | 0.0433 OR11H2    | olfactory receptor, family 11, subfamily H, me   | Coding           |
| TC1900010494.hg.1    | 5.43  | 5.11  | 1.25  | 0.0152 | 0.0435 HSPB6     | heat shock protein, alpha-crystallin-related, Bf | Multiple_Complex |
| TC1900006923.hg.1    | 3.58  | 3.37  | 1.16  | 0.0152 | 0.0435 OR1M1     | olfactory receptor, family 1, subfamily M, mer   | Coding           |
| TC1200012572.hg.1    | 6.05  | 6.6   | -1.47 | 0.0152 | 0.0435 ITFG2     | integrin alpha FG-GAP repeat containing 2        | NonCoding        |
| TC1100009667.hg.1    | 4.69  | 5.07  | -1.3  | 0.0152 | 0.0435 ANO9      | anoctamin 9                                      | Multiple_Complex |
| TC0900012175.hg.1    | 11.43 | 11    | 1.35  | 0.0153 | 0.0436 CDK9      | cyclin-dependent kinase 9                        | Multiple_Complex |
| TC1600007130.hg.1    | 3.85  | 3.54  | 1.24  | 0.0153 | 0.0437 ACSM5     | acyl-CoA synthetase medium-chain family me       | Multiple_Complex |
| TC1000012566.hg.1    | 6.19  | 6.63  | -1.36 | 0.0153 | 0.0437 MRPS16    | mitochondrial ribosomal protein S16              | Multiple_Complex |
| TC1200009791.hg.1    | 4.12  | 3.7   | 1.33  | 0.0153 | 0.0437 GDF3      | growth differentiation factor 3                  | Coding           |
| TC1200011885.hg.1    | 7.03  | 6.62  | 1.33  | 0.0153 | 0.0438 GLTP      | glycolipid transfer protein                      | Coding           |
| TC1200008771.hg.1    | 10.45 | 9.96  | 1.4   | 0.0153 | 0.0439 ISCU      | iron-sulfur cluster assembly enzyme              | Multiple_Complex |
| TC0100013281.hg.1    | 9.21  | 8.51  | 1.62  | 0.0153 | 0.0439 ASAP3     | ArfGAP with SH3 domain, ankyrin repeat and       | Multiple_Complex |
| TC0200007609.hg.1    | 8.53  | 9.13  | -1.52 | 0.0154 | 0.0439 SPTBN1    | spectrin, beta, non-erythrocytic 1               | Multiple_Complex |
| TC0900007094.hg.1    | 5.59  | 5.25  | 1.27  | 0.0154 | 0.0439 CA9       | carbonic anhydrase IX                            | Multiple_Complex |
| TC1200012149.hg.1    | 5.94  | 6.52  | -1.49 | 0.0154 | 0.0439 GCN1; MIR | GCN1 eIF2 alpha kinase activator homolog; mi     | Multiple_Complex |
| TC0400012873.hg.1    | 5.55  | 5.07  | 1.39  | 0.0154 | 0.044 FAM149A    | family with sequence similarity 149, member      | Multiple_Complex |
| TC1500009405.hg.1    | 5.01  | 4.67  | 1.27  | 0.0154 | 0.044 CYP19A1    | cytochrome P450, family 19, subfamily A, pol     | Multiple_Complex |
| TC0100018473.hg.1    | 8.3   | 7.9   | 1.31  | 0.0154 | 0.044 SEC22B     | Salzman2013 ALT_ACCEPTOR, CDS, coding, IN        | Multiple_Complex |
| TC1200012424.hg.1    | 4.62  | 4.13  | 1.4   | 0.0154 | 0.044 TMEM132L   | transmembrane protein 132D                       | Multiple_Complex |
| TC1100007537.hg.1    | 5.14  | 4.49  | 1.57  | 0.0154 | 0.0441 TRIM49B   | tripartite motif containing 49B                  | Coding           |
| TC0600011953.hg.1    | 5.67  | 6.84  | -2.24 | 0.0154 | 0.0441 PLA2G7    | phospholipase A2, group VII (platelet-activatir  | Multiple_Complex |
| TSUnmapped00000263.h | 3.76  | 4.22  | -1.38 | 0.0155 | 0.0442 BCL2L14   | BCL2-like 14 (apoptosis facilitator)             | NonCoding        |
| TC1500010877.hg.1    | 6.31  | 7.03  | -1.65 | 0.0155 | 0.0442 PARP16    | poly(ADP-ribose) polymerase family member        | Multiple_Complex |
| TC0100016086.hg.1    | 8.94  | 8.37  | 1.49  | 0.0155 | 0.0442 AIM2      | absent in melanoma 2                             | Multiple_Complex |
| TC2200007464.hg.1    | 5.79  | 6.21  | -1.34 | 0.0155 | 0.0442 L3MBTL2   | l(3)mbt-like 2 (Drosophila)                      | Multiple_Complex |
| TC1700008677.hg.1    | 3.6   | 3.57  | 1.02  | 0.0155 | 0.0443 CACNG4    | calcium channel, voltage-dependent, gamma        | Coding           |
| TC1900009808.hg.1    | 5.24  | 5.65  | -1.33 | 0.0155 | 0.0443 ADGRL1    | adhesion G protein-coupled receptor L1           | Multiple_Complex |
| TC0Y00007327.hg.1    | 3.81  | 3.44  | 1.29  | 0.0155 | 0.0443 TSPY10    | testis specific protein, Y-linked 10             | Coding           |
| TC0700010621.hg.1    | 5.93  | 5.61  | 1.24  | 0.0155 | 0.0443 FKBP14    | FK506 binding protein 14                         | Multiple_Complex |
| TC0100009056.hg.1    | 6.2   | 5.47  | 1.66  | 0.0156 | 0.0444 CCDC18    | coiled-coil domain containing 18                 | Multiple_Complex |
| TC0100016071.hg.1    | 4.72  | 4.09  | 1.55  | 0.0156 | 0.0444 OR6Y1     | olfactory receptor, family 6, subfamily Y, merr  | Coding           |
| TC2200007662.hg.1    | 4.29  | 4.69  | -1.32 | 0.0156 | 0.0444 GTSE1     | G-2 and S-phase expressed 1                      | Multiple_Complex |
| TC0200011673.hg.1    | 5.85  | 5.14  | 1.64  | 0.0156 | 0.0444 MBOAT2    | Memczak2013 ALT_ACCEPTOR, ALT_DONOR,             | NonCoding        |
| TC0500008846.hg.1    | 5.09  | 5.89  | -1.74 | 0.0156 | 0.0444 IGIP      | IgA-inducing protein                             | Coding           |
| TC1900011919.hg.1    | 8.43  | 9.1   | -1.59 | 0.0156 | 0.0445 ZNF708    | zinc finger protein 708                          | Multiple_Complex |
| TC1700009040.hg.1    | 9.23  | 10.06 | -1.77 | 0.0156 | 0.0445 SYNGR2    | synaptogyrin 2                                   | Multiple_Complex |
| TC0X00009128.hg.1    | 3.93  | 3.57  | 1.29  | 0.0156 | 0.0445 ACE2      | angiotensin I converting enzyme 2                | Multiple_Complex |
| TC1600007934.hg.1    | 4.07  | 4.51  | -1.36 | 0.0156 | 0.0446 CAPNS2    | calpain, small subunit 2                         | Coding           |
| TC1600007465.hg.1    | 6.01  | 5.84  | 1.12  | 0.0157 | 0.0447 ZNF48     | zinc finger protein 48                           | Multiple_Complex |
| TC1100007274.hg.1    | 4.74  | 5.5   | -1.69 | 0.0157 | 0.0447 CD44      | Memczak2013 ALT_ACCEPTOR, ALT_DONOR,             | NonCoding        |
| TC1500008053.hg.1    | 4.53  | 3.82  | 1.63  | 0.0157 | 0.0448 CFAP161   | cilia and flagella associated protein 161        | Multiple_Complex |
| TC0500006523.hg.1    | 9.05  | 9.54  | -1.4  | 0.0157 | 0.0448 NDUFS6    | NADH dehydrogenase (ubiquinone) Fe-S prote       | Multiple_Complex |
| TC1100009950.hg.1    | 4.23  | 3.87  | 1.28  | 0.0158 | 0.0448 OR56A5    | olfactory receptor, family 56, subfamily A, me   | Coding           |
| TC1400010331.hg.1    | 4.66  | 5.02  | -1.28 | 0.0158 | 0.0449 XRCC3     | X-ray repair complementing defective repair ii   | Multiple_Complex |
| TC1400010640.hg.1    | 5.06  | 5.66  | -1.51 | 0.0158 | 0.0449 TMEM251   | transmembrane protein 251                        | Coding           |
| TC2000009014.hg.1    | 9.94  | 10.25 | -1.24 | 0.0158 | 0.0449 NDRG3     | NDRG family member 3                             | Multiple_Complex |
| TC0900008010.hg.1    | 5.54  | 5.85  | -1.24 | 0.0158 | 0.045 PTPDC1     | protein tyrosine phosphatase domain containi     | Multiple_Complex |
| TC1200007861.hg.1    | 9.47  | 8.33  | 2.2   | 0.0158 | 0.045 LRP1       | LDL receptor related protein 1                   | Multiple_Complex |
| TC1000010129.hg.1    | 4.67  | 4.2   | 1.39  | 0.0158 | 0.0451 PTCHD3    | patched domain containing 3                      | Coding           |
| TC0800011312.hg.1    | 8.96  | 9.5   | -1.46 | 0.0159 | 0.0451 RRM2B     | ribonucleotide reductase M2 B (TP53 inducibl     | Multiple_Complex |
| TC0X00007238.hg.1    | 4.64  | 4.17  | 1.39  | 0.0159 | 0.0451 PAGE4     | P antigen family, member 4 (prostate associat    | Multiple_Complex |
| TC0300008506.hg.1    | 4.14  | 4.5   | -1.28 | 0.0159 | 0.0451 LRRC58    | Memczak2013 ANTISENSE, CDS, coding, INTEF        | NonCoding        |
| TC1900008276.hg.1    | 4.44  | 4.21  | 1.17  | 0.0159 | 0.0451 CEACAM16  | carcinoembryonic antigen-related cell adhesi     | Multiple_Complex |
| TC1900008968.hg.1    | 5.17  | 5.56  | -1.31 | 0.0159 | 0.0452 ZNF71     | zinc finger protein 71                           | Multiple_Complex |
| TC0800012202.hg.1    | 7.52  | 8.05  | -1.44 | 0.0159 | 0.0452 BOP1; MIR | block of proliferation 1; microRNA 7112          | Multiple_Complex |
| TC0100018112.hg.1    | 5.25  | 4.74  | 1.43  | 0.0159 | 0.0452 OR11L1    | olfactory receptor, family 11, subfamily L, mer  | Coding           |
| TC0500008055.hg.1    | 4.32  | 3.85  | 1.39  | 0.0159 | 0.0453 ADGRV1    | adhesion G protein-coupled receptor V1           | Multiple_Complex |
| TC0700010472.hg.1    | 11.75 | 11.38 | 1.29  | 0.016  | 0.0453 TRA2A     | transformer 2 alpha homolog (Drosophila)         | Multiple_Complex |
| TC0600014153.hg.1    | 3.71  | 4.21  | -1.42 | 0.016  | 0.0453 CFAP206   | cilia and flagella associated protein 206        | Multiple_Complex |
| TC1100011035.hg.1    | 8.84  | 9.52  | -1.61 | 0.016  | 0.0453 CPSF7     | cleavage and polyadenylation specific factor 7   | Multiple_Complex |
| TC1500010894.hg.1    | 5.73  | 6.19  | -1.38 | 0.016  | 0.0454 SNUPN     | snurportin 1                                     | Multiple_Complex |
| TC0100010924.hg.1    | 7.2   | 6.52  | 1.6   | 0.016  | 0.0454 C1orf27   | chromosome 1 open reading frame 27               | Multiple_Complex |
| TC1100012810.hg.1    | 6.18  | 5.6   | 1.5   | 0.016  | 0.0454 NFRKB     | Transcript Identified by AceView, Entrez Gene    | Unassigned       |
| TC0600007412.hg.1    | 3.94  | 3.67  | 1.21  | 0.016  | 0.0454 NKAPL     | NFKB activating protein-like                     | Coding           |



|                      |       |       |       |        |                   |                                                                          |                  |
|----------------------|-------|-------|-------|--------|-------------------|--------------------------------------------------------------------------|------------------|
| TC0100011746.hg.1    | 10.03 | 9.56  | 1.39  | 0.016  | 0.0454 CNIH4      | cornichon family AMPA receptor auxiliary protein                         | Multiple_Complex |
| TC1100008669.hg.1    | 4.4   | 4.9   | -1.42 | 0.016  | 0.0454 PRSS23     | protease, serine, 23                                                     | Multiple_Complex |
| TC0200016402.hg.1    | 8.19  | 12.94 | -27   | 0.016  | 0.0454 RSAD2      | radical S-adenosyl methionine domain containing                          | Multiple_Complex |
| TC0100014408.hg.1    | 5.92  | 6.46  | -1.45 | 0.016  | 0.0454 DOCK7      | dedicator of cytokinesis 7                                               | Multiple_Complex |
| TC1100006986.hg.1    | 3.9   | 3.5   | 1.32  | 0.016  | 0.0455 MRGPRX3    | MAS-related GPR, member X3                                               | Coding           |
| TC0500009417.hg.1    | 4.03  | 3.74  | 1.23  | 0.016  | 0.0455 TLX3       | T-cell leukemia homeobox 3                                               | Coding           |
| TC1900011932.hg.1    | 6.35  | 6.72  | -1.29 | 0.016  | 0.0455 ALKBH6     | alkB homolog 6                                                           | Multiple_Complex |
| TC1700012258.hg.1    | 5.7   | 5.31  | 1.31  | 0.016  | 0.0455 KRTAP9-8   | keratin associated protein 9-8                                           | Coding           |
| TC0400008813.hg.1    | 6.62  | 6.23  | 1.31  | 0.0161 | 0.0455 MGST2      | microsomal glutathione S-transferase 2                                   | Multiple_Complex |
| TC0600011914.hg.1    | 4.11  | 3.84  | 1.21  | 0.0161 | 0.0455 TCTE1      | t-complex-associated-testis-expressed 1                                  | Coding           |
| TC1900007386.hg.1    | 5.07  | 5.32  | -1.2  | 0.0161 | 0.0456 SSBP4      | single stranded DNA binding protein 4                                    | Multiple_Complex |
| TC0100012921.hg.1    | 7.41  | 7.8   | -1.31 | 0.0161 | 0.0456 DHRS3; MII | dehydrogenase/reductase (SDR family) member                              | Multiple_Complex |
| TC0900009073.hg.1    | 10.47 | 11.37 | -1.86 | 0.0161 | 0.0457 RPL7A; SNC | ribosomal protein L7a; small nucleolar RNA, C                            | Multiple_Complex |
| TC0400012606.hg.1    | 10.49 | 10.82 | -1.26 | 0.0161 | 0.0457 IRF2       | interferon regulatory factor 2                                           | Multiple_Complex |
| TC0X00008860.hg.1    | 11.41 | 11.92 | -1.42 | 0.0161 | 0.0457 F8A2; F8A3 | coagulation factor VIII-associated 2; coagulation                        | Coding           |
| TC0400006491.hg.1    | 6.09  | 6.47  | -1.29 | 0.0161 | 0.0457 IDUA       | iduronidase, alpha-L-                                                    | Multiple_Complex |
| TC1100006726.hg.1    | 6.21  | 6     | 1.16  | 0.0161 | 0.0457 SMPD1      | sphingomyelin phosphodiesterase 1, acid lysosomal                        | Multiple_Complex |
| TC1400007441.hg.1    | 4.87  | 5.62  | -1.69 | 0.0161 | 0.0457 AKAP5      | A kinase (PKA) anchor protein 5                                          | Coding           |
| TC1000011072.hg.1    | 4.21  | 3.9   | 1.24  | 0.0162 | 0.0458 DUSP13     | dual specificity phosphatase 13                                          | Multiple_Complex |
| TC0X00009964.hg.1    | 6.74  | 7.17  | -1.35 | 0.0162 | 0.0458 PDZD11     | PDZ domain containing 11                                                 | Multiple_Complex |
| TC0600007695.hg.1    | 7.77  | 7.45  | 1.25  | 0.0162 | 0.0458 PFDN6; MII | prefoldin subunit 6; microRNA 6834                                       | Multiple_Complex |
| TC0200008270.hg.1    | 5.27  | 4.93  | 1.26  | 0.0162 | 0.0458 ATOH8      | atonal bHLH transcription factor 8                                       | Multiple_Complex |
| TC0400008195.hg.1    | 3.94  | 3.52  | 1.34  | 0.0162 | 0.0459 PDHA2      | pyruvate dehydrogenase (lipoamide) alpha 2                               | Coding           |
| TC1100006509.hg.1    | 6.11  | 5.72  | 1.31  | 0.0162 | 0.0459 MUC5B      | mucin 5B, oligomeric mucus/gel-forming                                   | Multiple_Complex |
| TC1300008084.hg.1    | 9.09  | 8.16  | 1.9   | 0.0162 | 0.0459 ATP11A     | ATPase, class VI, type 11A                                               | Multiple_Complex |
| TC0600007568.hg.1    | 6.87  | 7.58  | -1.64 | 0.0162 | 0.046 HCG27       | HLA complex group 27 (non-protein coding)                                | Multiple_Complex |
| TC1900006525.hg.1    | 6.86  | 7.28  | -1.34 | 0.0163 | 0.046 C19orf24    | chromosome 19 open reading frame 24                                      | Multiple_Complex |
| TC2200007337.hg.1    | 7.24  | 6.98  | 1.2   | 0.0163 | 0.046 MAFF        | v-maf avian musculoaponeurotic fibrosarcoma                              | Multiple_Complex |
| TC0700009243.hg.1    | 11.34 | 12.07 | -1.67 | 0.0163 | 0.0461 TMEM140    | transmembrane protein 140                                                | Multiple_Complex |
| TC1100013171.hg.1    | 6.82  | 7.06  | -1.18 | 0.0163 | 0.0461 TUT1       | terminal uridylyl transferase 1, U6 snRNA-specific                       | Multiple_Complex |
| TC0500008664.hg.1    | 7.21  | 7.78  | -1.48 | 0.0163 | 0.0461 HSPA4      | heat shock 70kDa protein 4                                               | Multiple_Complex |
| TC1200009921.hg.1    | 4.34  | 4.9   | -1.47 | 0.0163 | 0.0461 TAS2R13    | taste receptor, type 2, member 13                                        | Coding           |
| TC1700008603.hg.1    | 8.31  | 7.79  | 1.43  | 0.0163 | 0.0461 CEP95      | centrosomal protein 95kDa                                                | Multiple_Complex |
| TC0800011826.hg.1    | 14.02 | 12.93 | 2.12  | 0.0164 | 0.0462 ASAP1; AS2 | ArfGAP with SH3 domain, ankyrin repeat and                               | Multiple_Complex |
| TC0300006513.hg.1    | 4.52  | 4.17  | 1.28  | 0.0164 | 0.0462 GRM7       | glutamate receptor, metabotropic 7                                       | Multiple_Complex |
| TC1600011405.hg.1    | 4.36  | 4.78  | -1.34 | 0.0164 | 0.0463 GINS3      | GINS complex subunit 3 (Psf3 homolog)                                    | Multiple_Complex |
| TC1400008973.hg.1    | 4.44  | 4.11  | 1.26  | 0.0164 | 0.0463 SLC25A21   | solute carrier family 25 (mitochondrial oxoaldehyde                      | Multiple_Complex |
| TC0100018208.hg.1    | 5.44  | 5.19  | 1.19  | 0.0164 | 0.0463 ZBTB88     | zinc finger and BTB domain containing 88                                 | Coding           |
| TC0100010280.hg.1    | 3.56  | 3.36  | 1.15  | 0.0164 | 0.0463 KCNJ9      | potassium channel, inwardly rectifying subfamily                         | Multiple_Complex |
| TC0300012338.hg.1    | 3.9   | 3.56  | 1.27  | 0.0164 | 0.0463 DNAJB8     | DnaJ (Hsp40) homolog, subfamily B, member 8                              | Coding           |
| TC0500010628.hg.1    | 7.23  | 7.53  | -1.23 | 0.0164 | 0.0464 ANXA2R     | annexin A2 receptor                                                      | Coding           |
| TC0800012311.hg.1    | 6.2   | 5.86  | 1.26  | 0.0164 | 0.0464 SGK3       | serum/glucocorticoid regulated kinase family, member                     | NonCoding        |
| TC1900008946.hg.1    | 6.8   | 6.36  | 1.36  | 0.0164 | 0.0464 GALP       | galanin-like peptide                                                     | Coding           |
| TC0400011202.hg.1    | 8.55  | 8.81  | -1.19 | 0.0164 | 0.0464 COQ2       | coenzyme Q2 4-hydroxybenzoate polyprenyltransferase                      | Multiple_Complex |
| TC0400007026.hg.1    | 4.6   | 4.17  | 1.35  | 0.0164 | 0.0464 RP11-362J1 | novel transcript, antisense to KCNIP4; Transcription                     | NonCoding        |
| TC1500007093.hg.1    | 8.91  | 8.34  | 1.48  | 0.0164 | 0.0464 EIF3J      | eukaryotic translation initiation factor 3, subunit                      | Multiple_Complex |
| TC1900011233.hg.1    | 4.17  | 3.82  | 1.27  | 0.0165 | 0.0465 KLK10      | kallikrein related peptidase 10                                          | Multiple_Complex |
| TC0X00011332.hg.1    | 4.47  | 4.06  | 1.33  | 0.0165 | 0.0465 PLXNB3     | plexin B3                                                                | Multiple_Complex |
| TC1100012651.hg.1    | 4.66  | 4.36  | 1.23  | 0.0165 | 0.0465 OR10G7     | olfactory receptor, family 10, subfamily G, member                       | Coding           |
| TSUnmapped00000298.h | 3.95  | 3.56  | 1.31  | 0.0165 | 0.0467 TGM4       | transglutaminase 4                                                       | NonCoding        |
| TC0600010383.hg.1    | 4.72  | 5.16  | -1.36 | 0.0165 | 0.0467 HUS1B      | HUS1 checkpoint clamp component B                                        | Coding           |
| TC1900010478.hg.1    | 5.29  | 4.86  | 1.35  | 0.0166 | 0.0467 KRTDAP     | keratinocyte differentiation-associated protein                          | Multiple_Complex |
| TC0900011846.hg.1    | 7.91  | 8.48  | -1.48 | 0.0166 | 0.0467 REXO4      | REX4 homolog, 3-5 exonuclease                                            | Multiple_Complex |
| TC1400010621.hg.1    | 10.05 | 9.25  | 1.74  | 0.0166 | 0.0467 CHURC1     | churchill domain containing 1                                            | Multiple_Complex |
| TC0X00008276.hg.1    | 4.22  | 3.76  | 1.37  | 0.0166 | 0.0468 ATP1B4     | ATPase, Na <sup>+</sup> /K <sup>+</sup> transporting, beta 4 polypeptide | Coding           |
| TC0700008659.hg.1    | 6.71  | 6.06  | 1.58  | 0.0166 | 0.0468 NFE4       | nuclear factor, erythroid 4                                              | Multiple_Complex |
| TC1100009110.hg.1    | 4.29  | 3.99  | 1.23  | 0.0166 | 0.0468 NNMT       | nicotinamide N-methyltransferase                                         | Multiple_Complex |
| TC0800011861.hg.1    | 7.92  | 6.77  | 2.22  | 0.0166 | 0.0468 LRRC6      | leucine rich repeat containing 6                                         | Multiple_Complex |
| TC0100015876.hg.1    | 7.3   | 6.5   | 1.74  | 0.0166 | 0.0468 ILF2       | Jeck2013 ALT_DONOR, coding, INTERNAL, intron                             | NonCoding        |
| TC0800011764.hg.1    | 5.49  | 5.82  | -1.26 | 0.0167 | 0.0469 FAM84B     | family with sequence similarity 84, member B                             | Multiple_Complex |
| TC0500009987.hg.1    | 9.14  | 9.71  | -1.49 | 0.0167 | 0.0469 MED10      | mediator complex subunit 10                                              | Multiple_Complex |
| TC1700008085.hg.1    | 7.6   | 7.33  | 1.2   | 0.0167 | 0.0469 STH        | saitohin                                                                 | Coding           |
| TC1200007615.hg.1    | 13.06 | 13.5  | -1.35 | 0.0167 | 0.0469 DIP2B      | disco-interacting protein 2 homolog B                                    | Multiple_Complex |
| TC1100009983.hg.1    | 6.29  | 5.92  | 1.29  | 0.0167 | 0.0469 MRPL17     | mitochondrial ribosomal protein L17                                      | Multiple_Complex |
| TC0500011100.hg.1    | 5.29  | 5.65  | -1.29 | 0.0167 | 0.047 ZNF366      | zinc finger protein 366                                                  | Multiple_Complex |
| TC1700008426.hg.1    | 3.89  | 3.62  | 1.2   | 0.0167 | 0.047 LPO         | lactoperoxidase                                                          | Multiple_Complex |
| TC1900011742.hg.1    | 9.08  | 8.56  | 1.44  | 0.0167 | 0.047 CEACAM6     | carcinoembryonic antigen-related cell adhesion                           | Coding           |
| TC0600013667.hg.1    | 6.01  | 6.55  | -1.46 | 0.0167 | 0.047 ARID1B      | Memczak2013 ANTISENSE, CDS, coding, INTF                                 | NonCoding        |
| TC0100013751.hg.1    | 5.95  | 6.3   | -1.28 | 0.0167 | 0.047 C1orf109    | chromosome 1 open reading frame 109                                      | Multiple_Complex |
| TC1700010747.hg.1    | 6.59  | 6.92  | -1.25 | 0.0167 | 0.047 COA3        | cytochrome c oxidase assembly factor 3                                   | Multiple_Complex |

|                   |       |       |       |        |                   |                                                 |                  |
|-------------------|-------|-------|-------|--------|-------------------|-------------------------------------------------|------------------|
| TC1900010582.hg.1 | 4.77  | 4.4   | 1.29  | 0.0167 | 0.047 WDR87       | WD repeat domain 87                             | Multiple_Complex |
| TC1600006637.hg.1 | 5.7   | 5.3   | 1.32  | 0.0167 | 0.0471 ZG16B      | zymogen granule protein 16B                     | Multiple_Complex |
| TC1600008984.hg.1 | 4.53  | 4.95  | -1.34 | 0.0167 | 0.0471 RPUSD1     | RNA pseudouridylate synthase domain contain     | Multiple_Complex |
| TC2000009149.hg.1 | 4.42  | 4.09  | 1.26  | 0.0168 | 0.0471 PTPRT      | protein tyrosine phosphatase, receptor type, 1  | Multiple_Complex |
| TC1900007294.hg.1 | 3.53  | 2.96  | 1.48  | 0.0168 | 0.0471 NWD1       | NACHT and WD repeat domain containing 1         | Multiple_Complex |
| TC0600008870.hg.1 | 3.38  | 3.11  | 1.21  | 0.0168 | 0.0472 FUT9       | fucosyltransferase 9 (alpha (1,3) fucosyltransf | Multiple_Complex |
| TC0100015896.hg.1 | 4.11  | 3.67  | 1.36  | 0.0168 | 0.0473 NUP210L; † | nucleoporin 210kDa like; microRNA 5698          | Multiple_Complex |
| TC0200008742.hg.1 | 9.22  | 8.49  | 1.66  | 0.0169 | 0.0474 NCK2       | NCK adaptor protein 2                           | Multiple_Complex |
| TC2000009828.hg.1 | 6.59  | 6.96  | -1.29 | 0.0169 | 0.0475 ARFRP1     | ADP-ribosylation factor related protein 1       | Multiple_Complex |
| TC1100011520.hg.1 | 7.2   | 6.84  | 1.28  | 0.0169 | 0.0475 KRTAP5-11  | keratin associated protein 5-11                 | Multiple_Complex |
| TC0300008316.hg.1 | 3.88  | 4.34  | -1.37 | 0.0169 | 0.0475 PVRL3      | poliovirus receptor-related 3                   | Multiple_Complex |
| TC0400009396.hg.1 | 6.62  | 6.26  | 1.28  | 0.0169 | 0.0475 NEIL3      | nei-like DNA glycosylase 3                      | Multiple_Complex |
| TC0900008474.hg.1 | 6.35  | 6.93  | -1.49 | 0.0169 | 0.0475 SNX30      | sorting nexin family member 30                  | Multiple_Complex |
| TC1100007940.hg.1 | 7.61  | 7.17  | 1.36  | 0.0169 | 0.0476 VEGFB      | vascular endothelial growth factor B            | Multiple_Complex |
| TC1800009228.hg.1 | 5.62  | 6.13  | -1.42 | 0.0169 | 0.0476 ELAC1      | elaC ribonuclease Z 1                           | Multiple_Complex |
| TC0500011759.hg.1 | 9.78  | 9.33  | 1.36  | 0.017  | 0.0476 ATG12      | autophagy related 12                            | Multiple_Complex |
| TC0900009346.hg.1 | 9.58  | 10.24 | -1.57 | 0.017  | 0.0476 CBWD1      | COBW domain containing 1                        | Multiple_Complex |
| TC1900011730.hg.1 | 6.21  | 5.7   | 1.43  | 0.017  | 0.0476 TIMMS50    | translocase of inner mitochondrial membrane     | NonCoding        |
| TC0600014099.hg.1 | 5.36  | 5.57  | -1.16 | 0.017  | 0.0477 GTF2H4     | general transcription factor IIH subunit 4      | Multiple_Complex |
| TC1600011445.hg.1 | 8.11  | 8.61  | -1.41 | 0.017  | 0.0477 SPG7       | spastic paraplegia 7 (pure and complicated au   | NonCoding        |
| TC0900009209.hg.1 | 7.86  | 7.15  | 1.64  | 0.017  | 0.0477 PMPCA      | peptidase (mitochondrial processing) alpha      | Multiple_Complex |
| TC1300009004.hg.1 | 4.41  | 4.11  | 1.23  | 0.017  | 0.0478 ATP7B      | ATPase, Cu++ transporting, beta polypeptide     | Multiple_Complex |
| TC1100006441.hg.1 | 10.98 | 10.38 | 1.52  | 0.017  | 0.0478 PSMD13     | proteasome 26S subunit, non-ATPase 13           | Multiple_Complex |
| TC1900011905.hg.1 | 6.26  | 5.95  | 1.24  | 0.017  | 0.0478 TMEM221    | transmembrane protein 221                       | Multiple_Complex |
| TC1900008416.hg.1 | 4.92  | 4.41  | 1.42  | 0.0171 | 0.048 INAFM1      | InaF-motif containing 1                         | Multiple_Complex |
| TC1900009350.hg.1 | 5.14  | 4.82  | 1.25  | 0.0171 | 0.0481 PLIN4      | perilipin 4                                     | Coding           |
| TC2000008110.hg.1 | 5.8   | 5.32  | 1.39  | 0.0172 | 0.0481 OPR1       | opiate receptor-like 1                          | Multiple_Complex |
| TC0700012812.hg.1 | 14.05 | 15.06 | -2.02 | 0.0172 | 0.0482 MKRN1      | makorin ring finger protein 1                   | Multiple_Complex |
| TC2200008367.hg.1 | 5.24  | 4.91  | 1.26  | 0.0172 | 0.0482 CHEK2      | checkpoint kinase 2                             | Multiple_Complex |
| TC0800007959.hg.1 | 4.73  | 4.39  | 1.27  | 0.0172 | 0.0482 STAU2-AS1  | STAU2 antisense RNA 1                           | NonCoding        |
| TC0800011731.hg.1 | 9.23  | 9.69  | -1.38 | 0.0172 | 0.0482 KIAA0196   | KIAA0196                                        | Multiple_Complex |

|                      |       |       |       |        |                   |                                                     |                  |
|----------------------|-------|-------|-------|--------|-------------------|-----------------------------------------------------|------------------|
| TSUnmapped00000677.h | 10.72 | 11.29 | -1.48 | 0.0172 | 0.0482 RPL7A      | ribosomal protein L7a                               | Coding           |
| TC0600014096.hg.1    | 6.14  | 6.56  | -1.34 | 0.0172 | 0.0482 TRIM39-RP  | TRIM39-RPP21 readthrough                            | Coding           |
| TC0500007665.hg.1    | 6.11  | 5.76  | 1.28  | 0.0172 | 0.0483 CCNB1      | cyclin B1                                           | Multiple_Complex |
| TC1900006552.hg.1    | 4.98  | 4.73  | 1.19  | 0.0173 | 0.0484 ONECUT3    | one cut homeobox 3                                  | Coding           |
| TC2000008436.hg.1    | 6.74  | 7.33  | -1.51 | 0.0173 | 0.0484 TASP1      | taspace 1                                           | Multiple_Complex |
| TC1700009474.hg.1    | 5.12  | 4.71  | 1.33  | 0.0173 | 0.0484 OR1P1      | olfactory receptor, family 1, subfamily P, mem      | Pseudogene       |
| TC1100006932.hg.1    | 4.61  | 4.16  | 1.36  | 0.0173 | 0.0484 INSC       | inscuteable homolog (Drosophila)                    | Multiple_Complex |
| TC0700010910.hg.1    | 5.89  | 6.33  | -1.35 | 0.0173 | 0.0485 POLD2      | polymerase (DNA directed), delta 2, accessory       | Multiple_Complex |
| TC1000012164.hg.1    | 5.77  | 6.15  | -1.3  | 0.0173 | 0.0485 DHX32      | DEAH (Asp-Glu-Ala-His) box polypeptide 32           | Multiple_Complex |
| TC0100013700.hg.1    | 5.1   | 4.66  | 1.36  | 0.0173 | 0.0485 CLSPN      | claspin                                             | Multiple_Complex |
| TC0200013265.hg.1    | 8.37  | 8.15  | 1.17  | 0.0173 | 0.0485 CAPG       | capping protein (actin filament), gelsolin-like     | Multiple_Complex |
| TSUnmapped00000010.h | 4.29  | 3.82  | 1.39  | 0.0174 | 0.0485 NLRP10     | NLR family, pyrin domain containing 10              | Coding           |
| TC0700013342.hg.1    | 5.31  | 5.71  | -1.32 | 0.0174 | 0.0486 CHN2       | chimerin 2                                          | Multiple_Complex |
| TC1100010984.hg.1    | 4.79  | 4.26  | 1.45  | 0.0174 | 0.0487 OR10V1     | olfactory receptor, family 10, subfamily V, me      | Coding           |
| TC1700010684.hg.1    | 8.67  | 8.03  | 1.55  | 0.0174 | 0.0487 HAP1       | huntingtin-associated protein 1                     | Coding           |
| TC2200007556.hg.1    | 5.35  | 5.09  | 1.2   | 0.0174 | 0.0488 MPPED1     | metallophosphoesterase domain containing 1          | Multiple_Complex |
| TC1600009535.hg.1    | 8.16  | 7.73  | 1.35  | 0.0175 | 0.0488 FOPNL      | FGFR10P N-terminal like                             | Multiple_Complex |
| TC0100008402.hg.1    | 4.24  | 3.9   | 1.27  | 0.0175 | 0.0488 MROH7; TT  | maestro heat-like repeat family member 7; te        | Multiple_Complex |
| TC0500011721.hg.1    | 9.87  | 10.36 | -1.4  | 0.0175 | 0.0489 REEP5      | receptor accessory protein 5                        | Multiple_Complex |
| TC0800009266.hg.1    | 4.77  | 5.17  | -1.32 | 0.0175 | 0.049 MFSD3       | major facilitator superfamily domain containir      | Multiple_Complex |
| TC0X00007707.hg.1    | 6.42  | 6.8   | -1.3  | 0.0175 | 0.049 ATP7A       | ATPase, Cu++ transporting, alpha polypeptide        | Multiple_Complex |
| TC0X00010914.hg.1    | 4.37  | 4.12  | 1.19  | 0.0175 | 0.049 CT45A7; CT  | cancer/testis antigen family 45, member A7; c       | Coding           |
| TC0600011880.hg.1    | 8.7   | 8.28  | 1.33  | 0.0176 | 0.049 GTPBP2      | GTP binding protein 2                               | Multiple_Complex |
| TC0700009337.hg.1    | 9.5   | 9.07  | 1.35  | 0.0176 | 0.0491 C7orf55-LU | C7orf55-LUC7L2 readthrough; LUC7-like 2 pre         | Multiple_Complex |
| TC0400011188.hg.1    | 7.13  | 6.61  | 1.43  | 0.0176 | 0.0491 LIN54      | lin-54 DREAM MuvB core complex component            | Multiple_Complex |
| TC0300006961.hg.1    | 4.34  | 4.55  | -1.15 | 0.0176 | 0.0491 CMTM8      | CKLF-like MARVEL transmembrane domain co            | Coding           |
| TC1200010774.hg.1    | 6.97  | 6.59  | 1.3   | 0.0176 | 0.0492 KRT76      | keratin 76, type II                                 | Coding           |
| TC1900011106.hg.1    | 6.43  | 5.88  | 1.47  | 0.0176 | 0.0492 NUCB1      | Memczak2013 ANTISENSE, CDS, coding, INTEF           | NonCoding        |
| TC0800009444.hg.1    | 3.86  | 3.65  | 1.16  | 0.0176 | 0.0493 DEFA5      | defensin, alpha 5, Paneth cell-specific             | Coding           |
| TC0900011441.hg.1    | 3.78  | 3.42  | 1.29  | 0.0177 | 0.0493 OR1N1      | olfactory receptor, family 1, subfamily N, men      | Coding           |
| TC1700011746.hg.1    | 3.99  | 4.42  | -1.34 | 0.0177 | 0.0493 SLC25A19   | solute carrier family 25 (mitochondrial thiamin     | Multiple_Complex |
| TC0200016623.hg.1    | 6.15  | 6.72  | -1.49 | 0.0177 | 0.0493 KIDINS220  | kinase D-interacting substrate 220kDa               | NonCoding        |
| TC0200008281.hg.1    | 7.84  | 8.34  | -1.42 | 0.0177 | 0.0493 PTCO3      | pentatricopeptide repeat domain 3                   | Multiple_Complex |
| TC0100008106.hg.1    | 4.72  | 4.41  | 1.24  | 0.0177 | 0.0493 BTBD19     | BTB (POZ) domain containing 19                      | Multiple_Complex |
| TC0Y00006569.hg.1    | 3.86  | 3.59  | 1.2   | 0.0177 | 0.0495 TSPY3; TSP | testis specific protein, Y-linked 3; testis specifi | Multiple_Complex |
| TC0900011440.hg.1    | 4.28  | 3.9   | 1.3   | 0.0177 | 0.0495 OR1J1      | olfactory receptor, family 1, subfamily J, mem      | Coding           |
| TC1300009740.hg.1    | 6.49  | 5.73  | 1.69  | 0.0178 | 0.0495 LIG4       | ligase IV, DNA, ATP-dependent                       | Coding           |
| TC1300006987.hg.1    | 5.92  | 6.27  | -1.27 | 0.0178 | 0.0496 DGKH       | diacylglycerol kinase, eta                          | Multiple_Complex |
| TC2100007399.hg.1    | 3.79  | 3.64  | 1.11  | 0.0178 | 0.0497 FAM207A    | family with sequence similarity 207, member         | Multiple_Complex |
| TC0200012172.hg.1    | 3.21  | 2.99  | 1.17  | 0.0178 | 0.0497 SRD5A2     | steroid-5-alpha-reductase, alpha polypeptide        | Multiple_Complex |
| TC0600011733.hg.1    | 4.94  | 4.6   | 1.27  | 0.0179 | 0.0498 KCNK5      | potassium channel, two pore domain subfami          | Multiple_Complex |
| TC0100010585.hg.1    | 5.12  | 4.6   | 1.43  | 0.0179 | 0.0498 FMO1       | Transcript Identified by AceView, Entrez Gene       | Unassigned       |
| TC0300006542.hg.1    | 6.67  | 6.53  | 1.11  | 0.0179 | 0.0498 THUMPD3    | THUMP domain containing 3                           | Multiple_Complex |
| TC1100012314.hg.1    | 3.77  | 3.41  | 1.29  | 0.0179 | 0.0498 PIH1D2     | PIH1 domain containing 2                            | Multiple_Complex |
| TC1900008513.hg.1    | 4.73  | 4.47  | 1.2   | 0.0179 | 0.0498 CGB2       | chorionic gonadotropin, beta polypeptide 2          | Coding           |
| TC1100008983.hg.1    | 5.77  | 5.35  | 1.33  | 0.0179 | 0.0498 ACAT1      | acetyl-CoA acetyltransferase 1                      | Multiple_Complex |
| TC1500007015.hg.1    | 4.37  | 4.77  | -1.32 | 0.0179 | 0.0499 JMJD7; PLA | jumonji domain containing 7; phospholipase          | Multiple_Complex |
| TC0800011021.hg.1    | 6.94  | 7.65  | -1.63 | 0.0179 | 0.0499 RMDN1      | regulator of microtubule dynamics 1                 | Multiple_Complex |

Supplementary Table 4. Symptomatic versus Asymptomatic

| ID       | Description                                                | setSize | enrichment | NES      | pvalue      | p.adjust | qvalues  | rank | leading_edge           | core_enrichment                                                                      |
|----------|------------------------------------------------------------|---------|------------|----------|-------------|----------|----------|------|------------------------|--------------------------------------------------------------------------------------|
| hsa05340 | Primary immunodeficiency                                   | 15      | -0.84331   | -2.60704 | 2.14E-05    | 0.007138 | 0.006363 | 120  | tags=47%, list=4%, sig | ZAP70/CITA/CD4/LCK/CD79A/CD3E/IL7R                                                   |
| hsa05146 | Amoebiasis                                                 | 22      | 0.970433   | 2.464056 | 4.73E-05    | 0.00787  | 0.007016 | 8    | tags=9%, list=0%, sig  | CXCL8/IL1R2                                                                          |
| hsa04622 | RIG-I-like receptor signaling pathway                      | 14      | 0.981222   | 2.338225 | 0.000132558 | 0.011378 | 0.010143 | 9    | tags=13%, list=0%, sig | CXCL8/NFKBIA                                                                         |
| hsa05134 | Legionellosis                                              | 18      | 0.971765   | 2.425981 | 0.000136672 | 0.011378 | 0.010143 | 9    | tags=11%, list=0%, sig | CXCL8/NFKBIA                                                                         |
| hsa04064 | NF-kappa B signaling pathway                               | 35      | 0.946949   | 2.578675 | 0.000214327 | 0.013207 | 0.011773 | 9    | tags=11%, list=0%, sig | CXCL8/BCL2A1/TNFAIP3/NFKBIA                                                          |
| hsa05219 | Bladder cancer                                             | 13      | 0.967593   | 2.331597 | 0.000237968 | 0.013207 | 0.011773 | 36   | tags=15%, list=1%, sig | CXCL8/MMP9                                                                           |
| hsa05144 | Malaria                                                    | 18      | 0.951883   | 2.376346 | 0.000453105 | 0.019285 | 0.017191 | 1    | tags=5%, list=0%, sig  | CXCL8                                                                                |
| hsa04933 | AGE-RAGE signaling pathway in diabetic complications       | 22      | 0.960582   | 2.439042 | 0.000464192 | 0.019285 | 0.017191 | 48   | tags=14%, list=1%, sig | CXCL8/EGR1/JUN                                                                       |
| hsa04072 | Phospholipase D signaling pathway                          | 26      | 0.961682   | 2.527692 | 0.000521213 | 0.019285 | 0.017191 | 1    | tags=4%, list=0%, sig  | CXCL8                                                                                |
| hsa05120 | Epithelial cell signaling in Helicobacter pylori infection | 20      | 0.963419   | 2.424798 | 0.000602955 | 0.020078 | 0.017898 | 9    | tags=10%, list=0%, sig | CXCL8/NFKBIA                                                                         |
| hsa05133 | Pertussis                                                  | 20      | 0.952718   | 2.397865 | 0.000895731 | 0.027116 | 0.024172 | 1    | tags=5%, list=0%, sig  | CXCL8                                                                                |
| hsa05417 | Lipid and atherosclerosis                                  | 57      | 0.895568   | 2.550634 | 0.001771302 | 0.048779 | 0.043483 | 48   | tags=7%, list=1%, sig  | CXCL8/NFKBIA/MMP9/JUN                                                                |
| hsa05332 | Graft-versus-host disease                                  | 19      | -0.7335    | -2.37641 | 0.002215798 | 0.048779 | 0.043483 | 515  | tags=68%, list=15%, s  | DRA/HLA-DMA/HLA-DPB1/PRF1/KLRD1/HLA-DPA1                                             |
| hsa05202 | Transcriptional misregulation in cancer                    | 65      | 0.903703   | 2.583629 | 0.002230851 | 0.048779 | 0.043483 | 78   | tags=12%, list=2%, sig | CXCL8/BCL2A1/IL1R2/MMP9/DEFA1B/DEFA1/DEFA3/NFKBIZ                                    |
| hsa04657 | IL-17 signaling pathway                                    | 25      | 0.954488   | 2.475543 | 0.002267223 | 0.048779 | 0.043483 | 54   | tags=28%, list=2%, sig | CXCL8/S100A8/TNFAIP3/NFKBIA/MMP9/JUN/S100A9                                          |
| hsa04940 | Type I diabetes mellitus                                   | 17      | -0.71224   | -2.28248 | 0.002734136 | 0.048779 | 0.043483 | 515  | tags=65%, list=15%, s  | DMA/HLA-DPB1/PRF1/HLA-DPA1                                                           |
| hsa05167 | Kaposi sarcoma-associated herpesvirus infection            | 56      | 0.882561   | 2.530445 | 0.003107683 | 0.048779 | 0.043483 | 137  | tags=14%, list=4%, sig | CXCL8/NFKBIA/JUN/CLEC2B/FOS/GNG11/PTGS2/HIF1A                                        |
| hsa05142 | Chagas disease                                             | 33      | 0.924825   | 2.524755 | 0.003266238 | 0.048779 | 0.043483 | 9    | tags=6%, list=0%, sig  | CXCL8/NFKBIA                                                                         |
| hsa04620 | Toll-like receptor signaling pathway                       | 25      | 0.943831   | 2.447901 | 0.003279783 | 0.048779 | 0.043483 | 9    | tags=8%, list=0%, sig  | CXCL8/NFKBIA                                                                         |
| hsa05130 | Pathogenic Escherichia coli infection                      | 54      | 0.913173   | 2.589678 | 0.003297306 | 0.048779 | 0.043483 | 9    | tags=4%, list=0%, sig  | CXCL8/NFKBIA                                                                         |
| hsa05161 | Hepatitis B                                                | 48      | 0.917499   | 2.569112 | 0.003440869 | 0.048779 | 0.043483 | 48   | tags=8%, list=1%, sig  | CXCL8/NFKBIA/MMP9/JUN                                                                |
| hsa04218 | Cellular senescence                                        | 44      | 0.923514   | 2.586131 | 0.003650994 | 0.048779 | 0.043483 | 1    | tags=2%, list=0%, sig  | CXCL8                                                                                |
| hsa05132 | Salmonella infection                                       | 74      | 0.88306    | 2.544307 | 0.003722987 | 0.048779 | 0.043483 | 48   | tags=5%, list=1%, sig  | CXCL8/NFKBIA/TXN/JUN                                                                 |
| hsa05131 | Shigellosis                                                | 81      | 0.878635   | 2.548849 | 0.003761012 | 0.048779 | 0.043483 | 9    | tags=2%, list=0%, sig  | CXCL8/NFKBIA                                                                         |
| hsa05171 | Coronavirus disease - COVID-19                             | 92      | 0.855915   | 2.501187 | 0.003852965 | 0.048779 | 0.043483 | 187  | tags=36%, list=6%, sig | S27/RPS6/RPL22/RPS23/RPL39/SELP                                                      |
| hsa05320 | Autoimmune thyroid disease                                 | 18      | -0.69018   | -2.24392 | 0.003955085 | 0.048779 | 0.043483 | 515  | tags=61%, list=15%, s  | DMA/HLA-DPB1/PRF1/HLA-DPA1                                                           |
| hsa05330 | Allgraft rejection                                         | 18      | -0.69018   | -2.24392 | 0.003955085 | 0.048779 | 0.043483 | 515  | tags=61%, list=15%, s  | HLA-DMB/FASLG/HLA-DQB1/HLA-DRB1/HLA-DQA1/CD28/HLA-DRA/HLA-DMA/HLA-DPB1/PRF1/HLA-DPA1 |

Supplementary Table 5. Severe versus mild

#%result\_name=Analysis\_34

#%array\_type=Clariom\_S\_Human

#%annotation=Clariom\_S\_Human.r1.na36.hg38.a1.transcript.csv

#%comparison=sev-COVID vs mild-COVID

| ID                | sev-COVID | mild-COVID | Fold Chang | P-val    | FDR P-val | Gene Symbol                        | Description                                                                                                   | Group            |
|-------------------|-----------|------------|------------|----------|-----------|------------------------------------|---------------------------------------------------------------------------------------------------------------|------------------|
| TC0100017793.hg.1 | 11.18     | 9.46       | 3.28       | 9.40E-05 | 0.9761    | IRF2BP2                            | interferon regulatory factor 2 binding protein 2                                                              | Multiple_Complex |
| TC0100011384.hg.1 | 12.05     | 10.91      | 2.19       | 0.0003   | 0.9761    | MAPKAPK2                           | mitogen-activated protein kinase-activated protein kinase 2                                                   | Multiple_Complex |
| TC0600007384.hg.1 | 5.16      | 6.29       | -2.19      | 0.0004   | 0.9761    | HIST1H2BO                          | histone cluster 1, H2bo                                                                                       | Coding           |
| TC1900010017.hg.1 | 10.41     | 9.37       | 2.05       | 0.0005   | 0.9761    | ELL                                | elongation factor RNA polymerase II                                                                           | Multiple_Complex |
| TC0700008147.hg.1 | 8.92      | 10.16      | -2.37      | 0.0005   | 0.9761    | RBSN1L                             | round spermatid basic protein 1-like                                                                          | Multiple_Complex |
| TC0100013126.hg.1 | 6.21      | 4.78       | 2.68       | 0.0006   | 0.9761    | EMC1                               | ER membrane protein complex subunit 1                                                                         | Multiple_Complex |
| TC0900007654.hg.1 | 4.74      | 3.51       | 2.34       | 0.0006   | 0.9761    | GNAQ; skeyp1orb1                   | Memczak2013 ANTISENSE, coding, INTERNAL, intronic best transcript NM_002072; Transcript Identified by AceView | NonCoding        |
| TC0200007188.hg.1 | 7.17      | 8.45       | -2.43      | 0.0006   | 0.9761    | BIRC6                              | Transcript Identified by AceView, Entrez Gene ID(s) 57448                                                     | Coding           |
| TC2000007083.hg.1 | 6.18      | 4.41       | 3.42       | 0.0007   | 0.9761    | ID1                                | inhibitor of DNA binding 1, dominant negative helix-loop-helix protein                                        | Multiple_Complex |
| TC1700009528.hg.1 | 12.96     | 10.84      | 4.37       | 0.0007   | 0.9761    | CXCL16                             | chemokine (C-X-C motif) ligand 16                                                                             | Multiple_Complex |
| TC0500007337.hg.1 | 13.71     | 14.97      | -2.39      | 0.0008   | 0.9761    | PARP8                              | poly(ADP-ribose) polymerase family member 8                                                                   | Multiple_Complex |
| TC0200007194.hg.1 | 5.71      | 7.34       | -3.07      | 0.001    | 0.9761    | BIRC6                              | Transcript Identified by AceView, Entrez Gene ID(s) 57448                                                     | Unassigned       |
| TC0100007552.hg.1 | 9.39      | 8.3        | 2.12       | 0.001    | 0.9761    | SESN2                              | sestrin 2                                                                                                     | Multiple_Complex |
| TC0300009789.hg.1 | 7.84      | 9.24       | -2.64      | 0.0012   | 0.9761    | ST6GAL1                            | ST6 beta-galactosamide alpha-2,6-sialyltransferase 1                                                          | Multiple_Complex |
| TC0200007999.hg.1 | 5.56      | 7.24       | -3.2       | 0.0013   | 0.9761    | ZNF638                             | Transcript Identified by AceView, Entrez Gene ID(s) 27332                                                     | Coding           |
| TC0700013594.hg.1 | 6.48      | 7.63       | -2.22      | 0.0017   | 0.9761    | TRIM4                              | tripartite motif containing 4                                                                                 | Multiple_Complex |
| TC1700007402.hg.1 | 11.59     | 9.61       | 3.93       | 0.0018   | 0.9761    | FLOT2                              | Memczak2013 ANTISENSE, coding, INTERNAL, UTR3 best transcript NM_004475                                       | NonCoding        |
| TC0100014653.hg.1 | 9.89      | 10.94      | -2.07      | 0.0019   | 0.9761    | USP33                              | ubiquitin specific peptidase 33                                                                               | Multiple_Complex |
| TC0200007035.hg.1 | 5.44      | 6.69       | -2.37      | 0.002    | 0.9761    | EPT1                               | ethanolaminephosphotransferase 1                                                                              | Multiple_Complex |
| TC1000010925.hg.1 | 8.89      | 10.88      | -3.98      | 0.0027   | 0.9761    | PRF1                               | perforin 1 (pore forming protein)                                                                             | Multiple_Complex |
| TC0300011936.hg.1 | 10.7      | 11.74      | -2.06      | 0.0027   | 0.9761    | CD47                               | CD47 molecule                                                                                                 | Multiple_Complex |
| TC0200009074.hg.1 | 6.92      | 8.89       | -3.92      | 0.0033   | 0.9761    | PTPN4                              | protein tyrosine phosphatase, non-receptor type 4 (megakaryocyte)                                             | Multiple_Complex |
| TC1500008135.hg.1 | 5.08      | 6.19       | -2.16      | 0.0035   | 0.9761    | UBE2Q2L                            | ubiquitin conjugating enzyme E2Q family member 2-like                                                         | Coding           |
| TC0900006758.hg.1 | 7.88      | 9.03       | -2.22      | 0.0035   | 0.9761    | DENND4C                            | DENN/MADD domain containing 4C                                                                                | Multiple_Complex |
| TC0100010674.hg.1 | 6.67      | 7.75       | -2.12      | 0.0037   | 0.9761    | GPR52                              | G protein-coupled receptor 52                                                                                 | Coding           |
| TC1600009620.hg.1 | 14.04     | 15.29      | -2.38      | 0.0037   | 0.9761    | SMG1                               | SMG1 phosphatidylinositol 3-kinase-related kinase                                                             | Multiple_Complex |
| TC0400009330.hg.1 | 7.31      | 8.56       | -2.38      | 0.0039   | 0.9761    | SAP30                              | Sin3A associated protein 30kDa                                                                                | Multiple_Complex |
| TC0600011145.hg.1 | 9.8       | 12.82      | -8.07      | 0.0041   | 0.9761    | HIST1H4H                           | histone cluster 1, H4h                                                                                        | Coding           |
| TC0100017059.hg.1 | 6.9       | 7.99       | -2.14      | 0.0041   | 0.9761    | RBBP5                              | retinoblastoma binding protein 5                                                                              | Multiple_Complex |
| TC1900008214.hg.1 | 10.22     | 6.54       | 12.78      | 0.0041   | 0.9761    | CD177                              | CD177 molecule                                                                                                | Coding           |
| TC0600014247.hg.1 | 14.84     | 16.3       | -2.75      | 0.0042   | 0.9761    | FAM65B                             | family with sequence similarity 65, member B                                                                  | Multiple_Complex |
| TC0600007301.hg.1 | 10.93     | 13.58      | -6.28      | 0.0042   | 0.9761    | BTN3A2                             | butyrophilin, subfamily 3, member A2                                                                          | Multiple_Complex |
| TC0600009697.hg.1 | 4.23      | 5.53       | -2.46      | 0.0042   | 0.9761    | PHACTR2                            | Jeck2013 ALT_ACCEPTOR, ALT_DONOR, coding, INTERNAL, intronic best transcript NM_001100164                     | NonCoding        |
| TC0100016318.hg.1 | 9.02      | 7.99       | 2.04       | 0.0042   | 0.9761    | MPC2                               | mitochondrial pyruvate carrier 2                                                                              | Multiple_Complex |
| TC0600011386.hg.1 | 14.89     | 12.59      | 4.94       | 0.0043   | 0.9761    | IER3                               | immediate early response 3                                                                                    | Coding           |
| TC1000009919.hg.1 | 7.18      | 8.19       | -2.01      | 0.0044   | 0.9761    | TRDMT1                             | tRNA aspartic acid methyltransferase 1                                                                        | Multiple_Complex |
| TC1700010953.hg.1 | 4.26      | 5.68       | -2.68      | 0.0044   | 0.9761    | KPNB1                              | Memczak2013 ANTISENSE, CDS, coding, INTERNAL best transcript NM_002265                                        | NonCoding        |
| TC0300009706.hg.1 | 5.16      | 6.24       | -2.12      | 0.0044   | 0.9761    | POLR2H                             | polymerase (RNA) II (DNA directed) polypeptide H                                                              | Multiple_Complex |
| TC0200007702.hg.1 | 9.37      | 10.4       | -2.04      | 0.0045   | 0.9761    | PAPOLG                             | poly(A) polymerase gamma                                                                                      | Multiple_Complex |
| TC1900011381.hg.1 | 5         | 3.84       | 2.23       | 0.0045   | 0.9761    | AC008753.6; MYZ antisense to MYADM | Memczak2013 ANTISENSE, coding, INTERNAL, intronic best transcript NM_001020819; novel transcript,             | NonCoding        |
| TC0100011755.hg.1 | 5.42      | 4.37       | 2.08       | 0.0048   | 0.9761    | DNAH14                             | dynein, axonemal, heavy chain 14                                                                              | Multiple_Complex |
| TC0200016442.hg.1 | 6.47      | 7.73       | -2.39      | 0.0052   | 0.9761    | MSH2                               | mutS homolog 2                                                                                                | Multiple_Complex |
| TC1700009398.hg.1 | 7.34      | 5.9        | 2.72       | 0.0054   | 0.9761    | MIR22HG                            | MIR22 host gene                                                                                               | Multiple_Complex |

|                   |       |       |       |        |        |           |                                                                                           |                  |
|-------------------|-------|-------|-------|--------|--------|-----------|-------------------------------------------------------------------------------------------|------------------|
| TC0100010244.hg.1 | 11.9  | 14.66 | -6.75 | 0.0055 | 0.9761 | IFI16     | interferon, gamma-inducible protein 16                                                    | Multiple_Complex |
| TC0300012596.hg.1 | 7.65  | 9.09  | -2.7  | 0.0058 | 0.9761 | COPB2     | coatamer protein complex subunit beta 2 (beta prime)                                      | Multiple_Complex |
| TC0600007375.hg.1 | 8.44  | 10.49 | -4.14 | 0.0059 | 0.9761 | HIST1H3H  | histone cluster 1, H3h                                                                    | Coding           |
| TC0100009555.hg.1 | 8.34  | 11.01 | -6.36 | 0.006  | 0.9761 | CD2       | CD2 molecule                                                                              | Coding           |
| TC0200012307.hg.1 | 9.61  | 10.66 | -2.08 | 0.0061 | 0.9761 | SOS1      | SOS Ras/Rac guanine nucleotide exchange factor 1                                          | Multiple_Complex |
| TC0300008888.hg.1 | 11.08 | 12.25 | -2.25 | 0.0063 | 0.9761 | CEP63     | centrosomal protein 63kDa                                                                 | Multiple_Complex |
| TC0800006880.hg.1 | 9.18  | 10.95 | -3.41 | 0.0065 | 0.9761 | PCM1      | pericentriolar material 1                                                                 | Multiple_Complex |
| TC1200007251.hg.1 | 12.05 | 14.06 | -4.04 | 0.0065 | 0.9761 | KIAA1551  | KIAA1551                                                                                  | Multiple_Complex |
| TC0100015023.hg.1 | 12.74 | 14.43 | -3.21 | 0.0066 | 0.9761 | DPYD      | dihydropyrimidine dehydrogenase                                                           | Multiple_Complex |
| TC0600013125.hg.1 | 7.5   | 10.07 | -5.95 | 0.0067 | 0.9761 | THEMIS    | thymocyte selection associated                                                            | Coding           |
| TC0600012875.hg.1 | 9.53  | 10.88 | -2.54 | 0.0069 | 0.9761 | FYN       | FYN proto-oncogene, Src family tyrosine kinase                                            | Multiple_Complex |
| TC0800012469.hg.1 | 8.76  | 10.4  | -3.12 | 0.0069 | 0.9761 | TMEM71    | transmembrane protein 71                                                                  | NonCoding        |
| TC0600007270.hg.1 | 13.62 | 14.63 | -2.02 | 0.0072 | 0.9761 | HIST1H2AC | histone cluster 1, H2ac                                                                   | Multiple_Complex |
| TC2100007140.hg.1 | 14.55 | 13    | 2.92  | 0.0076 | 0.9761 | ETS2      | v-ets avian erythroblastosis virus E26 oncogene homolog 2                                 | Multiple_Complex |
| TC0X00010357.hg.1 | 7.99  | 5.81  | 4.53  | 0.0077 | 0.9761 | GLA       | galactosidase, alpha                                                                      | Multiple_Complex |
| TC0700012111.hg.1 | 4.99  | 6.44  | -2.74 | 0.008  | 0.9761 | FBXL13    | F-box and leucine-rich repeat protein 13                                                  | Multiple_Complex |
| TC0500011896.hg.1 | 6.39  | 7.47  | -2.11 | 0.0082 | 0.9761 | ZNF608    | zinc finger protein 608                                                                   | Multiple_Complex |
| TC1100013081.hg.1 | 7.94  | 6.86  | 2.11  | 0.0088 | 0.9761 | FUT4      | fucosyltransferase 4 (alpha (1,3) fucosyltransferase, myeloid-specific)                   | Coding           |
| TC0400012638.hg.1 | 6.29  | 5.13  | 2.24  | 0.009  | 0.9761 | UFSP2     | UFM1-specific peptidase 2                                                                 | Multiple_Complex |
| TC0500007138.hg.1 | 11.09 | 13.41 | -4.99 | 0.0092 | 0.9761 | IL7R      | interleukin 7 receptor                                                                    | Multiple_Complex |
| TC1700010218.hg.1 | 12.1  | 9.98  | 4.36  | 0.0092 | 0.9761 | FLOT2     | flotillin 2                                                                               | Multiple_Complex |
| TC0300010775.hg.1 | 9.54  | 11.7  | -4.45 | 0.0093 | 0.9761 | CX3CR1    | chemokine (C-X3-C motif) receptor 1                                                       | Coding           |
| TC0600007303.hg.1 | 9.05  | 10.45 | -2.64 | 0.0095 | 0.9761 | BTN3A1    | butyrophilin, subfamily 3, member A1                                                      | Multiple_Complex |
| TC1700010497.hg.1 | 9.26  | 10.68 | -2.67 | 0.0096 | 0.9761 | SYNRG     | synergin, gamma                                                                           | Multiple_Complex |
| TC1700010587.hg.1 | 7.06  | 8.2   | -2.2  | 0.0096 | 0.9761 | IKZF3     | IKAROS family zinc finger 3                                                               | Multiple_Complex |
| TC0400012900.hg.1 | 12.62 | 14.65 | -4.08 | 0.0098 | 0.9761 | FBXL5     | F-box and leucine-rich repeat protein 5                                                   | Multiple_Complex |
| TC0200014269.hg.1 | 4.56  | 3.33  | 2.36  | 0.0099 | 0.9761 | POTE1     | POTE ankyrin domain family, member I                                                      | Multiple_Complex |
| TC1600011186.hg.1 | 9.84  | 8.49  | 2.55  | 0.0099 | 0.9761 | SLC7A5    | solute carrier family 7 (amino acid transporter light chain, L system), member 5          | Multiple_Complex |
| TC1000006754.hg.1 | 14.09 | 15.33 | -2.36 | 0.01   | 0.9761 | CELF2     | CUGBP, Elav-like family member 2                                                          | Multiple_Complex |
| TC0200007900.hg.1 | 10.88 | 12.14 | -2.4  | 0.01   | 0.9761 | ARHGAP25  | Rho GTPase activating protein 25                                                          | Multiple_Complex |
| TC1000010117.hg.1 | 7.66  | 8.7   | -2.06 | 0.0101 | 0.9761 | ACBD5     | acyl-CoA binding domain containing 5                                                      | Multiple_Complex |
| TC1100007273.hg.1 | 12.42 | 11.06 | 2.58  | 0.0102 | 0.9761 | CD44      | CD44 molecule (Indian blood group)                                                        | Multiple_Complex |
| TC0600007306.hg.1 | 9.79  | 11.74 | -3.86 | 0.0102 | 0.9761 | BTN3A3    | butyrophilin, subfamily 3, member A3                                                      | Multiple_Complex |
| TC0100016944.hg.1 | 12.1  | 10.97 | 2.18  | 0.0105 | 0.9761 | ARL8A     | ADP-ribosylation factor like GTPase 8A                                                    | Multiple_Complex |
| TC0700011797.hg.1 | 10.36 | 13.18 | -7.04 | 0.0105 | 0.9761 | SAMD9L    | sterile alpha motif domain containing 9-like                                              | Multiple_Complex |
| TC0200014857.hg.1 | 5     | 6.36  | -2.57 | 0.0105 | 0.9761 | FASTKD1   | FAST kinase domains 1                                                                     | Multiple_Complex |
| TC1100011545.hg.1 | 8.84  | 7.57  | 2.42  | 0.0106 | 0.9761 | ANAPC15   | anaphase promoting complex subunit 15                                                     | Multiple_Complex |
| TC1100007728.hg.1 | 10.16 | 11.38 | -2.32 | 0.0108 | 0.9761 | FAM111A   | family with sequence similarity 111, member A                                             | Multiple_Complex |
| TC1000011660.hg.1 | 6.83  | 8.62  | -3.47 | 0.0108 | 0.9761 | MGEA5     | Salzman2013 ALT_ACCEPTOR, ALT_DONOR, coding, INTERNAL, intronic best transcript NM_012215 | NonCoding        |
| TC0500012497.hg.1 | 11.66 | 10.45 | 2.32  | 0.0109 | 0.9761 | TNIP1     | TNFAIP3 interacting protein 1                                                             | Multiple_Complex |
| TC1900008328.hg.1 | 5.91  | 4.75  | 2.23  | 0.011  | 0.9761 | PPM1N     | protein phosphatase, Mg2+/Mn2+ dependent, 1N (putative)                                   | Multiple_Complex |
| TC0200013943.hg.1 | 7.82  | 8.97  | -2.22 | 0.011  | 0.9761 | SLC35F5   | solute carrier family 35, member F5                                                       | Multiple_Complex |
| TC1400010617.hg.1 | 9.27  | 11.74 | -5.55 | 0.0112 | 0.9761 | PRKCH     | protein kinase C, eta                                                                     | Multiple_Complex |
| TC0X00008081.hg.1 | 6.28  | 7.34  | -2.09 | 0.0117 | 0.9761 | ATG4A     | autophagy related 4A, cysteine peptidase                                                  | Multiple_Complex |
| TC0600007274.hg.1 | 9.36  | 10.44 | -2.12 | 0.0119 | 0.9761 | HIST1H2BD | histone cluster 1, H2bd                                                                   | Coding           |
| TC1300009249.hg.1 | 7.57  | 9.42  | -3.6  | 0.0122 | 0.9761 | KLF12     | Kruppel-like factor 12                                                                    | Multiple_Complex |
| TC1700007749.hg.1 | 7.25  | 8.37  | -2.17 | 0.0125 | 0.9761 | CDK12     | Transcript Identified by AceView, Entrez Gene ID(s) 51755                                 | Unassigned       |
| TC1300008359.hg.1 | 9.96  | 11.3  | -2.53 | 0.0127 | 0.9761 | PARP4     | poly(ADP-ribose) polymerase family member 4                                               | Multiple_Complex |
| TC1500009005.hg.1 | 6.19  | 7.26  | -2.1  | 0.0127 | 0.9761 | ZNF770    | zinc finger protein 770                                                                   | Multiple_Complex |
| TC0900006438.hg.1 | 12.93 | 14.08 | -2.22 | 0.0128 | 0.9761 | DOCK8     | dedicator of cytokinesis 8                                                                | Multiple_Complex |
| TC0200008534.hg.1 | 8.54  | 9.86  | -2.49 | 0.0128 | 0.9761 | ANKRD36   | ankyrin repeat domain 36                                                                  | Multiple_Complex |
| TC0200007181.hg.1 | 8.37  | 9.83  | -2.74 | 0.013  | 0.9761 | YIPF4     | Yip1 domain family member 4                                                               | Multiple_Complex |
| TC1200010518.hg.1 | 11.39 | 12.52 | -2.19 | 0.0135 | 0.9761 | SLC38A2   | solute carrier family 38, member 2                                                        | Multiple_Complex |
| TC1000011469.hg.1 | 4.39  | 5.59  | -2.3  | 0.0138 | 0.9761 | NOC3L     | NOC3-like DNA replication regulator                                                       | Multiple_Complex |

|                   |       |       |       |        |        |                    |                                                                                                      |                  |
|-------------------|-------|-------|-------|--------|--------|--------------------|------------------------------------------------------------------------------------------------------|------------------|
| TC0X0006671.hg.1  | 8.68  | 9.71  | -2.03 | 0.0138 | 0.9761 | MOSPD2             | motile sperm domain containing 2                                                                     | Multiple_Complex |
| TC0100016135.hg.1 | 8.28  | 10.59 | -4.96 | 0.0148 | 0.9761 | SLAMF6             | SLAM family member 6                                                                                 | Coding           |
| TC180006487.hg.1  | 15.21 | 16.64 | -2.7  | 0.0151 | 0.9761 | SMCHD1             | structural maintenance of chromosomes flexible hinge domain containing 1                             | Multiple_Complex |
| TC0100010526.hg.1 | 5.36  | 4.24  | 2.17  | 0.0157 | 0.9761 | TBX19              | T-box 19                                                                                             | Multiple_Complex |
| TC0400012964.hg.1 | 11.34 | 12.87 | -2.88 | 0.0159 | 0.9761 | SCLT1              | sodium channel and clathrin linker 1                                                                 | Multiple_Complex |
| TC0800007127.hg.1 | 6.38  | 8.36  | -3.94 | 0.0161 | 0.9761 | ELP3               | elongator acetyltransferase complex subunit 3                                                        | Multiple_Complex |
| TC1900011655.hg.1 | 8.12  | 6.76  | 2.56  | 0.0162 | 0.9761 | PET100             | PET100 homolog                                                                                       | Multiple_Complex |
| TC0100010243.hg.1 | 8.64  | 11.78 | -8.83 | 0.0165 | 0.9761 | PYHIN1             | pyrin and HIN domain family, member 1                                                                | Multiple_Complex |
| TC0100009870.hg.1 | 8.93  | 10.22 | -2.44 | 0.0173 | 0.9761 | HIST2H4B; HIST2H4A | histone cluster 2, H4b; histone cluster 2, H4a                                                       | Coding           |
| TC1700009318.hg.1 | 13.87 | 12.21 | 3.14  | 0.0173 | 0.9761 | FAM101B            | family with sequence similarity 101, member B                                                        | Multiple_Complex |
| TC0900009825.hg.1 | 9.41  | 11.45 | -4.11 | 0.0174 | 0.9761 | DDX58              | DEAD (Asp-Glu-Ala-Asp) box polypeptide 58                                                            | Multiple_Complex |
| TC0100012242.hg.1 | 6.82  | 8.08  | -2.4  | 0.0174 | 0.9761 | EFCAB2             | EF-hand calcium binding domain 2                                                                     | Multiple_Complex |
| TC0300007256.hg.1 | 9.07  | 10.53 | -2.77 | 0.0176 | 0.9761 | CCR2               | chemokine (C-C motif) receptor 2                                                                     | Multiple_Complex |
| TC0600014220.hg.1 | 9.82  | 10.84 | -2.03 | 0.0176 | 0.9761 | SERPINB9           | serpin peptidase inhibitor, clade B (ovalbumin), member 9                                            | Multiple_Complex |
| TC0300010561.hg.1 | 6.98  | 8.08  | -2.14 | 0.0179 | 0.9761 | SLC4A7             | solute carrier family 4, sodium bicarbonate cotransporter, member 7                                  | Multiple_Complex |
| TC0300013108.hg.1 | 7.2   | 8.45  | -2.38 | 0.018  | 0.9761 | TNIK               | TRAF2 and NCK interacting kinase                                                                     | Multiple_Complex |
| TC0X00008344.hg.1 | 7.33  | 8.84  | -2.86 | 0.018  | 0.9761 | SH2D1A             | SH2 domain containing 1A                                                                             | Multiple_Complex |
| TC0300011502.hg.1 | 6.25  | 7.68  | -2.69 | 0.0183 | 0.9761 | FOXP1; RP11-298    | Transcript Identified by AceView, Entrez Gene ID(s) 27086; novel transcript, sense intronic to FOXP1 | NonCoding        |
| TC0600008050.hg.1 | 11.2  | 12.86 | -3.17 | 0.0184 | 0.9761 | UBR2               | ubiquitin protein ligase E3 component n-recogin 2                                                    | Multiple_Complex |
| TC0500009055.hg.1 | 6.53  | 7.82  | -2.45 | 0.0187 | 0.9761 | ABLIM3             | actin binding LIM protein family, member 3                                                           | Multiple_Complex |
| TC0100014579.hg.1 | 7.95  | 9.35  | -2.64 | 0.0191 | 0.9761 | ZRANB2             | zinc finger, RAN-binding domain containing 2                                                         | Multiple_Complex |
| TC0100007396.hg.1 | 4.19  | 5.83  | -3.11 | 0.0191 | 0.9761 | RHD                | Rh blood group, D antigen                                                                            | Multiple_Complex |
| TC1100010090.hg.1 | 4.9   | 5.94  | -2.06 | 0.0192 | 0.9761 | LYVE1              | lymphatic vessel endothelial hyaluronan receptor 1                                                   | Multiple_Complex |
| TC0100018246.hg.1 | 8.19  | 9.65  | -2.76 | 0.0196 | 0.9761 | LRRRC8C            | leucine rich repeat containing 8 family, member C                                                    | Multiple_Complex |
| TC0600013880.hg.1 | 7.62  | 8.76  | -2.2  | 0.0199 | 0.9761 | SFT2D1             | SFT2 domain containing 1                                                                             | Multiple_Complex |
| TC1500009261.hg.1 | 8.26  | 9.45  | -2.29 | 0.0199 | 0.9761 | SPG11              | spastic paraplegia 11 (autosomal recessive)                                                          | Multiple_Complex |
| TC0800012371.hg.1 | 10.44 | 14.12 | -12.8 | 0.0199 | 0.9761 | LY6E               | lymphocyte antigen 6 complex, locus E                                                                | Multiple_Complex |
| TC0100008132.hg.1 | 6.3   | 7.5   | -2.3  | 0.0199 | 0.9761 | TMEM69             | transmembrane protein 69                                                                             | Multiple_Complex |
| TC1800007595.hg.1 | 5.86  | 4.6   | 2.39  | 0.02   | 0.9761 | CCDC102B           | coiled-coil domain containing 102B                                                                   | Multiple_Complex |
| TC1600010809.hg.1 | 9.13  | 10.36 | -2.35 | 0.02   | 0.9761 | TXNL4B             | thioredoxin-like 4B                                                                                  | Multiple_Complex |
| TC0700007831.hg.1 | 6.58  | 7.93  | -2.56 | 0.0201 | 0.9761 | TPST1              | tyrosylprotein sulfotransferase 1                                                                    | Multiple_Complex |
| TC0400012366.hg.1 | 8.25  | 10.74 | -5.65 | 0.0211 | 0.9761 | DDX60              | DEAD (Asp-Glu-Ala-Asp) box polypeptide 60                                                            | Multiple_Complex |
| TC0900008148.hg.1 | 9     | 10.18 | -2.27 | 0.0211 | 0.9761 | TDRD7              | tudor domain containing 7                                                                            | Multiple_Complex |
| TC1200010105.hg.1 | 7.48  | 8.51  | -2.05 | 0.0214 | 0.9761 | RECQL              | RecQ helicase-like                                                                                   | Multiple_Complex |
| TC1200006788.hg.1 | 8.87  | 11.85 | -7.91 | 0.0214 | 0.9761 | KLRD1              | killer cell lectin-like receptor subfamily D, member 1                                               | Multiple_Complex |
| TC0600007257.hg.1 | 9.43  | 11.21 | -3.45 | 0.0218 | 0.9761 | TRIM38             | tripartite motif containing 38                                                                       | Multiple_Complex |
| TC1100013205.hg.1 | 9.77  | 8.48  | 2.44  | 0.0218 | 0.9761 | ARAP1              | ArfGAP with RhoGAP domain, ankyrin repeat and PH domain 1                                            | Multiple_Complex |
| TC0100018483.hg.1 | 11.57 | 12.82 | -2.38 | 0.0219 | 0.9761 | HIST2H2BE          | histone cluster 2, H2be                                                                              | Coding           |
| TC0100015707.hg.1 | 9.57  | 10.82 | -2.38 | 0.0222 | 0.9761 | HIST2H4A; HIST2H4B | histone cluster 2, H4a; histone cluster 2, H4b                                                       | Multiple_Complex |
| TC0900007029.hg.1 | 12.9  | 11.82 | 2.11  | 0.0226 | 0.9761 | UBAP1              | ubiquitin associated protein 1                                                                       | Multiple_Complex |
| TC0800010002.hg.1 | 5.9   | 4.82  | 2.12  | 0.0227 | 0.9761 | DUSP4              | dual specificity phosphatase 4                                                                       | Multiple_Complex |
| TC0200014623.hg.1 | 8.7   | 9.81  | -2.16 | 0.023  | 0.9761 | STAM2              | signal transducing adaptor molecule (SH3 domain and ITAM motif) 2                                    | Multiple_Complex |
| TC0100010926.hg.1 | 6.6   | 8.04  | -2.71 | 0.023  | 0.9761 | OCLM               | Transcript Identified by AceView, Entrez Gene ID(s) 10896                                            | Unassigned       |
| TC1200008906.hg.1 | 9.21  | 10.32 | -2.15 | 0.0232 | 0.9761 | TRAFD1             | TRAF-type zinc finger domain containing 1                                                            | Multiple_Complex |
| TC0100009935.hg.1 | 5.92  | 7.21  | -2.44 | 0.0233 | 0.9761 | PRUNE              | prune exopolyphosphatase                                                                             | Multiple_Complex |
| TC1700007585.hg.1 | 8.33  | 10.45 | -4.36 | 0.0238 | 0.9761 | SLFN5              | schlafen family member 5                                                                             | Multiple_Complex |
| TC0900011523.hg.1 | 13.06 | 11.92 | 2.22  | 0.0241 | 0.9761 | HSPA5              | heat shock 70kDa protein 5 (glucose-regulated protein, 78kDa)                                        | Multiple_Complex |
| TC0600013204.hg.1 | 8.29  | 9.57  | -2.43 | 0.0242 | 0.9761 | VNN3               | vanin 3                                                                                              | Multiple_Complex |
| TC0200016679.hg.1 | 9.47  | 8.32  | 2.22  | 0.0245 | 0.9761 | SERTAD2            | SERTA domain containing 2                                                                            | Multiple_Complex |
| TC1700012440.hg.1 | 7.2   | 8.37  | -2.25 | 0.0247 | 0.9761 | RNFT1              | ring finger protein, transmembrane 1                                                                 | Multiple_Complex |
| TC0300008346.hg.1 | 7.06  | 8.48  | -2.68 | 0.0249 | 0.9761 | SLC35A5            | solute carrier family 35, member A5                                                                  | Multiple_Complex |

|                       |       |       |        |        |        |                           |                                                                                                                                                        |                  |
|-----------------------|-------|-------|--------|--------|--------|---------------------------|--------------------------------------------------------------------------------------------------------------------------------------------------------|------------------|
| TC030008561.hg.1      | 11.58 | 14.08 | -5.65  | 0.0249 | 0.9761 | PARP14                    | poly(ADP-ribose) polymerase family member 14                                                                                                           | Multiple_Complex |
| TC1200012753.hg.1     | 5.98  | 7.61  | -3.1   | 0.0251 | 0.9761 | KLRC2                     | killer cell lectin-like receptor subfamily C, member 2                                                                                                 | Coding           |
| TC0300011853.hg.1     | 8.32  | 9.43  | -2.15  | 0.0252 | 0.9761 | SENPF7                    | SUMO1/sentrin specific peptidase 7                                                                                                                     | Multiple_Complex |
| TC060007307.hg.1      | 8.73  | 9.96  | -2.33  | 0.0253 | 0.9761 | BTN2A1                    | butyrophilin, subfamily 2, member A1                                                                                                                   | Multiple_Complex |
| TC0200012405.hg.1     | 6.43  | 8.18  | -3.36  | 0.0254 | 0.9761 | THADA                     | thyroid adenoma associated                                                                                                                             | Multiple_Complex |
| TC1600011075.hg.1     | 11.95 | 10.9  | 2.07   | 0.0262 | 0.9761 | ZDHC7                     | zinc finger, DHHC-type containing 7                                                                                                                    | Multiple_Complex |
| TC030007242.hg.1      | 8.4   | 9.46  | -2.08  | 0.0263 | 0.9761 | SACM1L                    | SAC1 suppressor of actin mutations 1-like (yeast)                                                                                                      | Multiple_Complex |
| TC110009101.hg.1      | 5.92  | 7.16  | -2.35  | 0.0265 | 0.9761 | ZBTB16                    | zinc finger and BTB domain containing 16                                                                                                               | Multiple_Complex |
| TC190008326.hg.1      | 7.4   | 5.34  | 4.17   | 0.0266 | 0.9761 | FOSB                      | FBJ murine osteosarcoma viral oncogene homolog B                                                                                                       | Multiple_Complex |
| TC1700012198.hg.1     | 5.29  | 6.51  | -2.33  | 0.0268 | 0.9761 | PIGL                      | phosphatidylinositol glycan anchor biosynthesis class L                                                                                                | Multiple_Complex |
| TC0100014459.hg.1     | 7.56  | 8.57  | -2.02  | 0.0269 | 0.9761 | LINC01359                 | long intergenic non-protein coding RNA 1359                                                                                                            | NonCoding        |
| TC100008400.hg.1      | 6.98  | 12.89 | -60.48 | 0.0272 | 0.9761 | IFIT1                     | interferon-induced protein with tetratricopeptide repeats 1                                                                                            | Coding           |
| TSUnmapped0000401.hg. | 9.8   | 10.87 | -2.1   | 0.0274 | 0.9761 | INPP5D                    | inositol polyphosphate-5-phosphatase D                                                                                                                 | NonCoding        |
| TC060008346.hg.1      | 6.92  | 7.94  | -2.02  | 0.0275 | 0.9761 | KIAA1586                  | KIAA1586                                                                                                                                               | Multiple_Complex |
| TC100009149.hg.1      | 6.73  | 7.96  | -2.34  | 0.0278 | 0.9761 | PLEKHA1                   | pleckstrin homology domain containing, family A (phosphoinositide binding specific) member 1                                                           | Multiple_Complex |
| TC010009331.hg.1      | 9.76  | 11.28 | -2.88  | 0.0278 | 0.9761 | STXBPF3                   | syntaxin binding protein 3                                                                                                                             | Multiple_Complex |
| TC010008978.hg.1      | 7.63  | 8.76  | -2.19  | 0.0281 | 0.9761 | LRRCC8B                   | leucine rich repeat containing 8 family, member B                                                                                                      | Multiple_Complex |
| TC0100011219.hg.1     | 6.6   | 8.29  | -3.23  | 0.0283 | 0.9761 | PPP1R12B                  | protein phosphatase 1, regulatory subunit 12B                                                                                                          | Multiple_Complex |
| TC0800011861.hg.1     | 7.38  | 8.94  | -2.95  | 0.0287 | 0.9761 | LRRCC6                    | leucine rich repeat containing 6                                                                                                                       | Multiple_Complex |
| TC1200008921.hg.1     | 7.31  | 10.39 | -8.47  | 0.0287 | 0.9761 | OAS2                      | 2-5-oligoadenylate synthetase 2                                                                                                                        | Multiple_Complex |
| TC1200012708.hg.1     | 9.29  | 13.13 | -14.35 | 0.029  | 0.9761 | OAS1                      | 2-5-oligoadenylate synthetase 1                                                                                                                        | Multiple_Complex |
| TC080006983.hg.1      | 8.8   | 9.92  | -2.17  | 0.0292 | 0.9761 | PPP3CC                    | protein phosphatase 3, catalytic subunit, gamma isozyme                                                                                                | Multiple_Complex |
| TC0900011302.hg.1     | 7.21  | 8.63  | -2.68  | 0.0297 | 0.9761 | TNFSF8                    | tumor necrosis factor (ligand) superfamily, member 8                                                                                                   | Multiple_Complex |
| TC200009673.hg.1      | 6.82  | 5.62  | 2.29   | 0.0299 | 0.9761 | SYCP2                     | synaptonemal complex protein 2                                                                                                                         | Multiple_Complex |
| TC010007964.hg.1      | 6.17  | 7.36  | -2.29  | 0.0299 | 0.9761 | ZNF684                    | zinc finger protein 684                                                                                                                                | Multiple_Complex |
| TC0100015182.hg.1     | 10.68 | 9.64  | 2.06   | 0.0301 | 0.9761 | TAF13                     | TAF13 RNA polymerase II, TATA box binding protein (TBP)-associated factor, 18kDa                                                                       | Multiple_Complex |
| TC170006676.hg.1      | 8.47  | 9.9   | -2.7   | 0.0302 | 0.9761 | RABEP1                    | rabaptin, RAB GTPase binding effector protein 1                                                                                                        | Multiple_Complex |
| TC190009637.hg.1      | 8.61  | 7.6   | 2.01   | 0.0306 | 0.9761 | CDKN2D                    | cyclin-dependent kinase inhibitor 2D (p19, inhibits CDK4)                                                                                              | Coding           |
| TC110007461.hg.1      | 7.66  | 6.62  | 2.06   | 0.0308 | 0.9761 | ARHGAP1                   | Memczak2013 ANTISENSE, CDS, coding, INTERNAL, UTR3 best transcript NM_004308                                                                           | NonCoding        |
| TC0600011136.hg.1     | 7.33  | 8.93  | -3.02  | 0.0309 | 0.9761 | HIST1H2BG                 | histone cluster 1, H2bg                                                                                                                                | Multiple_Complex |
| TC0500012247.hg.1     | 12.56 | 14.23 | -3.18  | 0.0311 | 0.9761 | CD14                      | CD14 molecule                                                                                                                                          | Coding           |
| TC0300013877.hg.1     | 7.63  | 9.15  | -2.87  | 0.0317 | 0.9761 | EPHB1                     | EPH receptor B1                                                                                                                                        | Multiple_Complex |
| TC190008496.hg.1      | 11.95 | 10.69 | 2.41   | 0.032  | 0.9761 | PPP1R15A                  | protein phosphatase 1, regulatory subunit 15A                                                                                                          | Multiple_Complex |
| TC0X00010915.hg.1     | 4.52  | 5.62  | -2.14  | 0.0327 | 0.9761 | CT45A2                    | cancer/testis antigen family 45, member A2                                                                                                             | Coding           |
| TC050009481.hg.1      | 17.91 | 18.95 | -2.05  | 0.0335 | 0.9761 | ATP6V0E1                  | ATPase, H+ transporting, lysosomal 9kDa, V0 subunit e1                                                                                                 | Multiple_Complex |
| TC1500010698.hg.1     | 9.26  | 10.74 | -2.8   | 0.0335 | 0.9761 | SNRPN; SNURF; Si neighbor | small nuclear ribonucleoprotein polypeptide N; SNRPN upstream reading frame; small nucleolar RNA, C/D box 107; Prader Willi/Angelman region RNA, SNRPN | Multiple_Complex |
| TC120006738.hg.1      | 6.66  | 9.24  | -6     | 0.0338 | 0.9761 | KLRG1                     | killer cell lectin-like receptor subfamily G, member 1                                                                                                 | Multiple_Complex |
| TC0300013146.hg.1     | 11.2  | 13.23 | -4.09  | 0.0341 | 0.9761 | TNFSF10                   | tumor necrosis factor (ligand) superfamily, member 10                                                                                                  | Multiple_Complex |
| TC130008760.hg.1      | 10.18 | 12.66 | -5.57  | 0.0344 | 0.9761 | EPST1                     | epithelial stromal interaction 1 (breast)                                                                                                              | Multiple_Complex |
| TC210007208.hg.1      | 11.02 | 14.25 | -9.37  | 0.0348 | 0.9761 | MX1                       | MX dynamin-like GTPase 1                                                                                                                               | Multiple_Complex |
| TC0200012159.hg.1     | 4.33  | 3.33  | 2      | 0.0349 | 0.9761 | CAPN13                    | calpain 13                                                                                                                                             | Multiple_Complex |
| TC0100015797.hg.1     | 6.29  | 7.33  | -2.05  | 0.035  | 0.9761 | POGZ                      | Transcript Identified by AceView, Entrez Gene ID(s) 23126                                                                                              | Unassigned       |
| TC170007319.hg.1      | 9.8   | 11.37 | -2.97  | 0.035  | 0.9761 | WSB1                      | WD repeat and SOCS box containing 1                                                                                                                    | Multiple_Complex |
| TC070008560.hg.1      | 12.39 | 11.34 | 2.06   | 0.0353 | 0.9761 | GNB2                      | guanine nucleotide binding protein (G protein), beta polypeptide 2                                                                                     | Multiple_Complex |
| TC050009268.hg.1      | 8.99  | 10.06 | -2.11  | 0.0354 | 0.9761 | TTC1                      | tetratricopeptide repeat domain 1                                                                                                                      | Multiple_Complex |



|                   |       |       |        |        |        |           |                                                                                                                                                            |                  |
|-------------------|-------|-------|--------|--------|--------|-----------|------------------------------------------------------------------------------------------------------------------------------------------------------------|------------------|
| TC0100012496.hg.1 | 11.66 | 12.97 | -2.48  | 0.0359 | 0.9761 | NADK      | NAD kinase                                                                                                                                                 | Multiple_Complex |
|                   |       |       |        |        |        |           | selenoprotein K; selenoprotein K<br>[Source:EntrezGene;Acc:58515]; Transcript Identified<br>by AceView, Entrez Gene ID(s) 58515, RefSeq ID(s)<br>NM_021237 | Multiple_Complex |
| TC0300011223.hg.1 | 8.25  | 7.2   | 2.08   | 0.036  | 0.9761 | SELK      | Transcript Identified by AceView, Entrez Gene ID(s)<br>153129                                                                                              | Multiple_Complex |
| TC0500010781.hg.1 | 5.52  | 6.55  | -2.04  | 0.0363 | 0.9761 | SLC38A9   |                                                                                                                                                            | Unassigned       |
| TC2200007783.hg.1 | 8.93  | 7.6   | 2.53   | 0.0366 | 0.9761 | PIM3      | Pim-3 proto-oncogene, serine/threonine kinase                                                                                                              | Multiple_Complex |
| TC0X00006938.hg.1 | 4.59  | 3.44  | 2.22   | 0.0366 | 0.9761 | CFAP47    | cilia and flagella associated protein 47                                                                                                                   | Multiple_Complex |
| TC0100016476.hg.1 | 10.72 | 11.77 | -2.07  | 0.0367 | 0.9761 | KIAA0040  | KIAA0040                                                                                                                                                   | Multiple_Complex |
| TC0600007293.hg.1 | 5.15  | 6.41  | -2.4   | 0.0369 | 0.9761 | HIST1H2BI | histone cluster 1, H2bi                                                                                                                                    | Coding           |
| TC1700010459.hg.1 | 8.33  | 7.1   | 2.33   | 0.0372 | 0.9761 | CCL3      | chemokine (C-C motif) ligand 3                                                                                                                             | Multiple_Complex |
| TC1100008779.hg.1 | 4.42  | 3.2   | 2.32   | 0.0373 | 0.9761 | CCDC67    | coiled-coil domain containing 67                                                                                                                           | Multiple_Complex |
| TC1200007626.hg.1 | 10.42 | 11.69 | -2.41  | 0.0373 | 0.9761 | METTL7A   | methyltransferase like 7A                                                                                                                                  | Coding           |
| TC0100016185.hg.1 | 16.16 | 17.47 | -2.49  | 0.0375 | 0.9761 | FCGR3A    | Fc fragment of IgG, low affinity IIIa, receptor (CD16a)                                                                                                    | Multiple_Complex |
| TC1900009824.hg.1 | 13    | 11.77 | 2.35   | 0.0383 | 0.9761 | DNAJB1    | Dnaj (Hsp40) homolog, subfamily B, member 1                                                                                                                | Multiple_Complex |
| TC0500011881.hg.1 | 6.45  | 7.76  | -2.48  | 0.0386 | 0.9761 | CEP120    | centrosomal protein 120kDa                                                                                                                                 | Multiple_Complex |
| TC0100013189.hg.1 | 4.29  | 3.28  | 2.01   | 0.0389 | 0.9761 | KIF17     | kinesin family member 17                                                                                                                                   | Multiple_Complex |
| TC0800006692.hg.1 | 8.66  | 7.41  | 2.37   | 0.0395 | 0.9761 | MSRA      | methionine sulfoxide reductase A                                                                                                                           | Multiple_Complex |
| TC0200011020.hg.1 | 8.69  | 10.09 | -2.64  | 0.0399 | 0.9761 | SP140     | SP140 nuclear body protein                                                                                                                                 | Multiple_Complex |
| TC0Y00006898.hg.1 | 5.84  | 7.16  | -2.49  | 0.0404 | 0.9761 | DHRX      | Jeck2013 ALT_ACCEPTOR, ALT_DONOR, coding,<br>INTERNAL, intronic best transcript NM_145177                                                                  | NonCoding        |
| TC0100018525.hg.1 | 5.65  | 4.5   | 2.23   | 0.0408 | 0.9761 | ILDR2     | immunoglobulin-like domain containing receptor 2                                                                                                           | NonCoding        |
| TC1200012190.hg.1 | 8.94  | 11.42 | -5.6   | 0.0415 | 0.9761 | OASL      | 2-5-oligoadenylate synthetase-like                                                                                                                         | Multiple_Complex |
| TC1100011372.hg.1 | 8.73  | 7.46  | 2.42   | 0.0416 | 0.9761 | CHKA      | choline kinase alpha                                                                                                                                       | Multiple_Complex |
| TC0100008874.hg.1 | 9.83  | 10.88 | -2.07  | 0.0417 | 0.9761 | PRKACB    | protein kinase, cAMP-dependent, catalytic, beta                                                                                                            | Multiple_Complex |
| TC0800011472.hg.1 | 5.56  | 6.71  | -2.22  | 0.0418 | 0.9761 | NUDCD1    | NudC domain containing 1                                                                                                                                   | Multiple_Complex |
| TC1900006477.hg.1 | 5.23  | 6.36  | -2.19  | 0.042  | 0.9761 | FSTL3     | folliculin-like 3 (secreted glycoprotein)                                                                                                                  | Multiple_Complex |
| TC0200008675.hg.1 | 13.46 | 14.83 | -2.58  | 0.0421 | 0.9761 | IL18RAP   | interleukin 18 receptor accessory protein                                                                                                                  | Multiple_Complex |
| TC1500007615.hg.1 | 5.55  | 6.58  | -2.04  | 0.0422 | 0.9761 | MAP2K1    | Transcript Identified by AceView, Entrez Gene ID(s)<br>5604                                                                                                | Unassigned       |
| TC0200012091.hg.1 | 4.59  | 3.52  | 2.11   | 0.0423 | 0.9761 | ZNF512    | Memczak2013 ANTISENSE, coding, INTERNAL, UTR3<br>best transcript NM_032434                                                                                 | NonCoding        |
| TC0600011814.hg.1 | 7.81  | 9.32  | -2.83  | 0.0425 | 0.9761 | CCND3     | Memczak2013 ALT_ACCEPTOR, ALT_DONOR, coding,<br>INTERNAL, intronic best transcript NM_001136017                                                            | NonCoding        |
| TC1200010908.hg.1 | 8.27  | 9.48  | -2.3   | 0.0425 | 0.9761 | STAT2     | signal transducer and activator of transcription 2                                                                                                         | Multiple_Complex |
| TC1100012037.hg.1 | 7.49  | 8.85  | -2.56  | 0.0426 | 0.9761 | MAML2     | mastermind-like transcriptional coactivator 2                                                                                                              | Multiple_Complex |
| TC1900007748.hg.1 | 7.58  | 6.57  | 2.02   | 0.0427 | 0.9761 | PDCD5     | programmed cell death 5                                                                                                                                    | Multiple_Complex |
| TC1000011704.hg.1 | 12.46 | 13.48 | -2.02  | 0.0428 | 0.9761 | NTSC2     | 5-nucleotidase, cytosolic II                                                                                                                               | Multiple_Complex |
| TC0100009939.hg.1 | 7.39  | 8.52  | -2.19  | 0.0433 | 0.9761 | GABPB2    | GA binding protein transcription factor, beta subunit 2                                                                                                    | Multiple_Complex |
| TC0900010582.hg.1 | 5.85  | 7.09  | -2.35  | 0.0437 | 0.9761 | KIF27     | kinesin family member 27                                                                                                                                   | Multiple_Complex |
| TC0600014110.hg.1 | 11.7  | 13.07 | -2.59  | 0.0449 | 0.9761 | PSMB9     | proteasome subunit beta 9                                                                                                                                  | Multiple_Complex |
| TC1300006658.hg.1 | 6.19  | 4.99  | 2.3    | 0.0459 | 0.9761 | WASF3     | WAS protein family, member 3                                                                                                                               | Multiple_Complex |
| TC0100014852.hg.1 | 11.07 | 13.03 | -3.88  | 0.0463 | 0.9761 | GBP1      | guanylate binding protein 1, interferon-inducible                                                                                                          | Multiple_Complex |
| TC0700009677.hg.1 | 8.5   | 9.89  | -2.61  | 0.0466 | 0.9761 | GIMAP4    | GTPase, IMAP family member 4                                                                                                                               | Multiple_Complex |
| TC1200012864.hg.1 | 7.71  | 8.79  | -2.12  | 0.0477 | 0.9761 | CCDC92    | coiled-coil domain containing 92                                                                                                                           | Multiple_Complex |
| TC0200014995.hg.1 | 15.79 | 16.81 | -2.03  | 0.0477 | 0.9761 | WIPF1     | WAS/WASL interacting protein family, member 1                                                                                                              | Multiple_Complex |
| TC1000009714.hg.1 | 6.95  | 8.17  | -2.34  | 0.0479 | 0.9761 | PRKCQ     | protein kinase C, theta                                                                                                                                    | Multiple_Complex |
| TC0600008863.hg.1 | 6.7   | 7.92  | -2.32  | 0.0479 | 0.9761 | MANEA     | mannosidase, endo-alpha                                                                                                                                    | Multiple_Complex |
| TC1700010447.hg.1 | 15.96 | 17.68 | -3.3   | 0.0479 | 0.9761 | CCL5      | chemokine (C-C motif) ligand 5                                                                                                                             | Coding           |
| TC1700012387.hg.1 | 7.15  | 8.19  | -2.05  | 0.0483 | 0.9761 | SLFN12L   | schlafen family member 12-like                                                                                                                             | Multiple_Complex |
| TC1800008331.hg.1 | 9.49  | 10.77 | -2.42  | 0.0485 | 0.9761 | SS18      | synovial sarcoma translocation, chromosome 18                                                                                                              | Multiple_Complex |
| TC0700012797.hg.1 | 9.68  | 11.62 | -3.84  | 0.0486 | 0.9761 | PARP12    | poly(ADP-ribose) polymerase family member 12                                                                                                               | Multiple_Complex |
| TC2000009013.hg.1 | 7.21  | 8.67  | -2.74  | 0.0488 | 0.9761 | SLA2      | Src-like-adaptor 2                                                                                                                                         | Coding           |
| TC1000008397.hg.1 | 9.73  | 14.38 | -25.12 | 0.0496 | 0.9761 | IFIT3     | interferon-induced protein with tetratricopeptide<br>repeats 3                                                                                             | Coding           |
| TC0100007676.hg.1 | 7.71  | 9.07  | -2.56  | 0.0498 | 0.9761 | LCK       | LCK proto-oncogene, Src family tyrosine kinase                                                                                                             | Multiple_Complex |

Supplementary Fig 6. Asymptomatic versus uninfected

##result\_name=Analysis\_31

##array\_type=Clariom\_S\_Human

##annotation=Clariom\_S\_Human.r.1.na36.hg38.a1.transcript.csv

##comparison=Asymp vs uninfected

| ID                | Asymp | Avg uninfected | Fold Chang | P-val    | FDR P-val | Gene Symbol     | Description                                              | Group            |
|-------------------|-------|----------------|------------|----------|-----------|-----------------|----------------------------------------------------------|------------------|
| TC1600007014.hg.1 | 9.76  | 11.63          | -3.65      | 1.03E-09 | 1.68E-05  | NDE1; MIR484    | nudE neurodevelopment protein 1; microRNA 484            | Multiple_Complex |
| TC0600007377.hg.1 | 11.58 | 8.07           | 11.42      | 1.57E-09 | 1.68E-05  | HIST1H2BM       | histone cluster 1, H2bm                                  | Coding           |
| TC1600009935.hg.1 | 10.88 | 8.84           | 4.12       | 5.44E-09 | 3.89E-05  | SPN             | Memczak2013 ANTISENSE, CDS, coding, INTERNAL be          | NonCoding        |
| TC1400007950.hg.1 | 14.18 | 12.65          | 2.9        | 7.39E-09 | 3.96E-05  | CALM1           | calmodulin 1 (phosphorylase kinase, delta)               | Multiple_Complex |
| TC1000010498.hg.1 | 7.65  | 8.94           | -2.45      | 1.12E-08 | 4.80E-05  |                 | Transcript Identified by AceView, Entrez Gene ID(s) 2    | Unassigned       |
| TC1300008998.hg.1 | 9.02  | 11.21          | -4.56      | 2.17E-08 | 6.67E-05  | LINC00282       | long intergenic non-protein coding RNA 282               | NonCoding        |
| TC1400008056.hg.1 | 10.81 | 5.74           | 33.55      | 2.18E-08 | 6.67E-05  | IFI27           | interferon, alpha-inducible protein 27                   | Multiple_Complex |
| TC0200006677.hg.1 | 8     | 5.84           | 4.49       | 5.38E-08 | 0.0001    | RRM2            | ribonucleotide reductase M2                              | Multiple_Complex |
| TC1900011852.hg.1 | 5.45  | 6.75           | -2.47      | 6.12E-08 | 0.0001    | RFX2            | regulatory factor X, 2 (influences HLA class II expressi | Multiple_Complex |
| TC1900010073.hg.1 | 9.77  | 11.22          | -2.72      | 6.31E-08 | 0.0001    | LPAR2           | lysophosphatidic acid receptor 2                         | Multiple_Complex |
| TC0300008563.hg.1 | 9.67  | 11.15          | -2.8       | 6.86E-08 | 0.0001    | DIRC2           | disrupted in renal carcinoma 2                           | Multiple_Complex |
| TC0900007457.hg.1 | 6.35  | 9.11           | -6.76      | 7.21E-08 | 0.0001    | CNTNAP3P2; CNT  | contactin associated protein-like 3 pseudogene 2; co     | Multiple_Complex |
| TC0400008105.hg.1 | 9.85  | 8.42           | 2.7        | 7.36E-08 | 0.0001    | HERC6           | HECT and RLD domain containing E3 ubiquitin protei       | Multiple_Complex |
| TC0600012814.hg.1 | 13.17 | 12.01          | 2.23       | 8.03E-08 | 0.0001    | CD164           | CD164 molecule, sialomucin                               | Multiple_Complex |
| TC1400008905.hg.1 | 9.17  | 7.9            | 2.4        | 8.36E-08 | 0.0001    | SPTSSA          | serine palmitoyltransferase, small subunit A             | Multiple_Complex |
| TC0300009855.hg.1 | 8.65  | 10.75          | -4.28      | 1.21E-07 | 0.0002    | IL1RAP          | interleukin 1 receptor accessory protein                 | Multiple_Complex |
| TC1900007108.hg.1 | 15.39 | 13.98          | 2.66       | 1.32E-07 | 0.0002    | CALR            | calreticulin                                             | Multiple_Complex |
| TC0X00009387.hg.1 | 7.47  | 9.11           | -3.13      | 1.34E-07 | 0.0002    | RPGR            | retinitis pigmentosa GTPase regulator                    | Multiple_Complex |
| TC0200011690.hg.1 | 12.02 | 11.09          | 1.91       | 1.39E-07 | 0.0002    | YWHAQ           | tyrosine 3-monooxygenase/tryptophan 5-monooxyg           | Multiple_Complex |
| TC1300008760.hg.1 | 11.7  | 8.22           | 11.12      | 1.41E-07 | 0.0002    | EPST11          | epithelial stromal interaction 1 (breast)                | Multiple_Complex |
| TC0900010968.hg.1 | 9.91  | 8.62           | 2.44       | 1.51E-07 | 0.0002    | TRIM14          | tripartite motif containing 14                           | Multiple_Complex |
| TSUnmapped0000028 | 6.27  | 7.19           | -1.89      | 1.88E-07 | 0.0002    | MLXIP           | MLX interacting protein                                  | Coding           |
| TC1100008010.hg.1 | 8.21  | 9.27           | -2.09      | 2.15E-07 | 0.0002    | CDC42EP2        | CDC42 effector protein (Rho GTPase binding) 2            | Multiple_Complex |
| TC2100008385.hg.1 | 8.51  | 7.54           | 1.97       | 2.27E-07 | 0.0002    | SUMO3           | small ubiquitin-like modifier 3                          | Multiple_Complex |
| TC2000007479.hg.1 | 9.99  | 14.67          | -25.69     | 2.34E-07 | 0.0002    | PI3             | peptidase inhibitor 3, skin-derived                      | Multiple_Complex |
| TC0900010959.hg.1 | 6.57  | 9.54           | -7.81      | 2.65E-07 | 0.0002    | HEMGN           | hemogen                                                  | Multiple_Complex |
| TC2000009376.hg.1 | 11.33 | 12.39          | -2.09      | 3.00E-07 | 0.0002    | STAU1           | staufen double-stranded RNA binding protein 1            | Multiple_Complex |
| TC1100009942.hg.1 | 7.16  | 5.47           | 3.24       | 3.60E-07 | 0.0003    | TRIM22          | Memczak2013 ANTISENSE, CDS, coding, INTERNAL, U          | NonCoding        |
| TC1800006506.hg.1 | 14.07 | 12.59          | 2.78       | 3.92E-07 | 0.0003    | MYL12A          | myosin light chain 12A                                   | Multiple_Complex |
| TC1700012190.hg.1 | 11.43 | 10.56          | 1.83       | 4.00E-07 | 0.0003    | EIF4A1; SNORD1C | eukaryotic translation initiation factor 4A1; small nuc  | Multiple_Complex |
| TC1800009268.hg.1 | 7.63  | 9.98           | -5.11      | 4.10E-07 | 0.0003    | DSC2            | desmocollin 2                                            | Multiple_Complex |
| TC1500008485.hg.1 | 9.04  | 11.1           | -4.17      | 4.36E-07 | 0.0003    | IGF1R           | insulin-like growth factor 1 receptor                    | Multiple_Complex |
| TC0400011057.hg.1 | 7.59  | 6.79           | 1.74       | 4.36E-07 | 0.0003    | SCARB2          | scavenger receptor class B, member 2                     | Multiple_Complex |
| TC0600013431.hg.1 | 6.62  | 7.94           | -2.49      | 4.45E-07 | 0.0003    | PLAGL1; HYMAI   | pleiomorphic adenoma gene-like 1; hydatidiform mo        | Multiple_Complex |
| TC0700008588.hg.1 | 7.59  | 6.92           | 1.59       | 4.86E-07 | 0.0003    | ZNHIT1          | zinc finger, HIT-type containing 1                       | Multiple_Complex |
| TC1400010764.hg.1 | 8.35  | 9.25           | -1.86      | 5.39E-07 | 0.0003    | VT11B           | vesicle transport through interaction with t-SNARES 1    | Multiple_Complex |
| TC1800008584.hg.1 | 9.27  | 8.45           | 1.75       | 5.52E-07 | 0.0003    | ATP5A1          | ATP synthase, H+ transporting, mitochondrial F1 com      | Multiple_Complex |
| TC0100007574.hg.1 | 14.5  | 16.95          | -5.49      | 5.65E-07 | 0.0003    | EPB41           | erythrocyte membrane protein band 4.1                    | Multiple_Complex |
| TC1200008726.hg.1 | 10.92 | 12.84          | -3.79      | 5.66E-07 | 0.0003    | TCP11L2         | t-complex 11, testis-specific-like 2                     | Multiple_Complex |
| TC0800012371.hg.1 | 15.19 | 11.2           | 15.91      | 6.25E-07 | 0.0003    | LY6E            | lymphocyte antigen 6 complex, locus E                    | Multiple_Complex |
| TC1200012708.hg.1 | 14.63 | 10.55          | 16.81      | 6.80E-07 | 0.0004    | OAS1            | 2-5-oligoadenylate synthetase 1                          | Multiple_Complex |
| TC1200008920.hg.1 | 11.17 | 7.71           | 10.96      | 6.94E-07 | 0.0004    | OAS3            | 2-5-oligoadenylate synthetase 3                          | Multiple_Complex |
| TC0X00008824.hg.1 | 12.41 | 11.38          | 2.04       | 8.60E-07 | 0.0004    | TKTL1           | transketolase-like 1                                     | Multiple_Complex |
| TC0500010680.hg.1 | 9.74  | 7.82           | 3.8        | 8.62E-07 | 0.0004    | PARP8           | Memczak2013 ANTISENSE, CDS, coding, INTERNAL, ir         | NonCoding        |
| TC1700010254.hg.1 | 14.49 | 15.69          | -2.3       | 9.03E-07 | 0.0004    | SSH2            | slingshot protein phosphatase 2                          | Multiple_Complex |
| TC2000008228.hg.1 | 8.17  | 6.98           | 2.29       | 9.61E-07 | 0.0004    | SIGLEC1         | sialic acid binding Ig-like lectin 1, sialoadhesin       | Coding           |
| TC0600011225.hg.1 | 14.71 | 13.65          | 2.09       | 9.99E-07 | 0.0005    | HIST1H2AJ       | histone cluster 1, H2aj                                  | Multiple_Complex |
| TC0200011075.hg.1 | 16.04 | 14.93          | 2.16       | 1.20E-06 | 0.0005    | PTMA            | prothymosin, alpha                                       | Multiple_Complex |
| TC0200016626.hg.1 | 9.3   | 10.82          | -2.86      | 1.21E-06 | 0.0005    | MBOAT2          | membrane bound O-acyltransferase domain containi         | Multiple_Complex |
| TC2200006540.hg.1 | 7.99  | 5.05           | 7.65       | 1.30E-06 | 0.0005    | USP18           | ubiquitin specific peptidase 18                          | Multiple_Complex |
| TC1100012966.hg.1 | 8.78  | 10.73          | -3.88      | 1.32E-06 | 0.0005    | MICAL2          | microtubule associated monooxygenase, calponin an        | Multiple_Complex |
| TC1000010990.hg.1 | 8.16  | 9.11           | -1.94      | 1.33E-06 | 0.0005    | DNAJB12         | DnaJ (Hsp40) homolog, subfamily B, member 12             | Multiple_Complex |
| TC0X00009493.hg.1 | 4.78  | 5.92           | -2.2       | 1.36E-06 | 0.0005    | EFHC2           | EF-hand domain (C-terminal) containing 2                 | Multiple_Complex |
| TC0600011235.hg.1 | 7.24  | 6.16           | 2.1        | 1.38E-06 | 0.0005    | HIST1H2AM; HIST | histone cluster 1, H2am; histone cluster 1, H3j          | Multiple_Complex |
| TC2000008678.hg.1 | 13.03 | 11.28          | 3.36       | 1.76E-06 | 0.0007    | CST3            | cystatin C                                               | Multiple_Complex |
| TC0600007274.hg.1 | 9.58  | 8.49           | 2.13       | 1.84E-06 | 0.0007    | HIST1H2BD       | histone cluster 1, H2bd                                  | Coding           |
| TC1100013048.hg.1 | 7.33  | 6.73           | 1.51       | 1.94E-06 | 0.0007    | DPP3            | dipeptidyl-peptidase 3                                   | Multiple_Complex |
| TC2000007820.hg.1 | 6.42  | 7.9            | -2.79      | 1.96E-06 | 0.0007    | CASS4           | Cas scaffolding protein family member 4                  | Multiple_Complex |
| TC0600011124.hg.1 | 6.9   | 5.2            | 3.25       | 2.16E-06 | 0.0008    | HIST1H3B        | histone cluster 1, H3b                                   | Coding           |
| TC0400006706.hg.1 | 10.05 | 11.45          | -2.64      | 2.18E-06 | 0.0008    | TBC1D14         | TBC1 domain family, member 14                            | Multiple_Complex |
| TC0100011721.hg.1 | 13.66 | 12.73          | 1.91       | 2.27E-06 | 0.0008    | CAPN2           | calpain 2, (m/II) large subunit                          | Multiple_Complex |
| TC0X00010837.hg.1 | 14.12 | 16.83          | -6.54      | 2.29E-06 | 0.0008    | MBNL3           | muscleblind-like splicing regulator 3                    | Multiple_Complex |
| TC1600008164.hg.1 | 9.02  | 10.19          | -2.25      | 2.37E-06 | 0.0008    | FAM65A          | family with sequence similarity 65, member A             | Multiple_Complex |
| TC0200011624.hg.1 | 11.65 | 7.82           | 14.23      | 2.40E-06 | 0.0008    | CMPK2           | cytidine monophosphate (UMP-CMP) kinase 2, mitoc         | Multiple_Complex |
| TC0X00007026.hg.1 | 11.78 | 12.8           | -2.03      | 2.45E-06 | 0.0008    | USP9X           | ubiquitin specific peptidase 9, X-linked                 | Multiple_Complex |
| TC1200010927.hg.1 | 14.46 | 13.79          | 1.6        | 2.46E-06 | 0.0008    | ATP5B           | ATP synthase, H+ transporting, mitochondrial F1 cor      | Multiple_Complex |

|                   |       |       |       |          |        |                   |                                                         |                  |
|-------------------|-------|-------|-------|----------|--------|-------------------|---------------------------------------------------------|------------------|
| TC1000008881.hg.1 | 12.21 | 14.69 | -5.61 | 2.53E-06 | 0.0008 | MXI1              | MAX interactor 1, dimerization protein                  | Multiple_Complex |
| TC0600014236.hg.1 | 8.6   | 6.95  | 3.13  | 2.80E-06 | 0.0009 | TXNDC5            | thioredoxin domain containing 5 (endoplasmic reticu     | Multiple_Complex |
| TC2200008036.hg.1 | 8.17  | 4.88  | 9.82  | 2.90E-06 | 0.0009 | USP41             | ubiquitin specific peptidase 41                         | Multiple_Complex |
| TC2200006641.hg.1 | 7.13  | 6.46  | 1.59  | 3.00E-06 | 0.0009 | RANBP1            | RAN binding protein 1                                   | Multiple_Complex |
| TC2200008370.hg.1 | 10.04 | 9.36  | 1.6   | 3.04E-06 | 0.0009 | XBP1              | X-box binding protein 1                                 | Multiple_Complex |
| TC1700010677.hg.1 | 6.16  | 5.19  | 1.97  | 3.43E-06 | 0.001  | KRT19             | keratin 19, type I                                      | Multiple_Complex |
| TC2100007208.hg.1 | 15.91 | 11.54 | 20.6  | 3.44E-06 | 0.001  | MX1               | MX dynamin-like GTPase 1                                | Multiple_Complex |
| TC0900008879.hg.1 | 13.07 | 12.07 | 2     | 3.47E-06 | 0.001  | SET               | SET nuclear proto-oncogene                              | Multiple_Complex |
| TC1300008424.hg.1 | 9.14  | 10.83 | -3.22 | 3.77E-06 | 0.0011 | USP12             | ubiquitin specific peptidase 12                         | Multiple_Complex |
| TC2200009219.hg.1 | 14.38 | 11.4  | 7.9   | 3.87E-06 | 0.0011 | IGLL5; MIR5571; I | immunoglobulin lambda-like polypeptide 5; microRN       | Multiple_Complex |
| TC1900009838.hg.1 | 10.68 | 12.15 | -2.78 | 3.89E-06 | 0.0011 | ADGRE2            | adhesion G protein-coupled receptor E2                  | Multiple_Complex |
| TC1600009683.hg.1 | 12.86 | 14.28 | -2.67 | 3.92E-06 | 0.0011 | IGSF6             | immunoglobulin superfamily, member 6                    | Multiple_Complex |
| TC2000009968.hg.1 | 8.61  | 10.46 | -3.6  | 4.02E-06 | 0.0011 | SIRPB2            | signal-regulatory protein beta 2                        | Multiple_Complex |
| TC0100013369.hg.1 | 7.44  | 6.21  | 2.35  | 4.18E-06 | 0.0011 | STMN1; MIR3917    | stathmin 1; microRNA 3917                               | Multiple_Complex |
| TC0100016625.hg.1 | 14.91 | 16.12 | -2.32 | 4.24E-06 | 0.0011 | GLUL              | glutamate-ammonia ligase                                | Multiple_Complex |
| TC0600010797.hg.1 | 6.54  | 7.88  | -2.52 | 4.60E-06 | 0.0012 | MAK               | male germ cell-associated kinase                        | Coding           |
| TC1900011251.hg.1 | 14.77 | 12.7  | 4.22  | 4.64E-06 | 0.0012 | NKG7              | natural killer cell granule protein 7                   | Coding           |
| TC1200008921.hg.1 | 12.13 | 8.85  | 9.72  | 4.68E-06 | 0.0012 | OAS2              | 2-5-oligoadenylate synthetase 2                         | Multiple_Complex |
| TC0400011744.hg.1 | 13.66 | 12.39 | 2.4   | 4.69E-06 | 0.0012 | ANXA5             | annexin A5                                              | Multiple_Complex |
| TC1700008128.hg.1 | 9.76  | 10.74 | -1.96 | 4.93E-06 | 0.0012 | NPEPPS            | aminopeptidase puromycin sensitive                      | Multiple_Complex |
| TC1700008984.hg.1 | 13.98 | 15.48 | -2.82 | 5.13E-06 | 0.0013 | SEC14L1; SCARN/   | SEC14-like lipid binding 1; small Cajal body-specific R | Multiple_Complex |
| TC0800008300.hg.1 | 9.44  | 10.69 | -2.38 | 5.19E-06 | 0.0013 | CPQ               | carboxypeptidase Q                                      | Multiple_Complex |
| TC0400008879.hg.1 | 10.37 | 11.79 | -2.68 | 5.28E-06 | 0.0013 | GAB1              | GRB2-associated binding protein 1                       | Multiple_Complex |
| TC1100009301.hg.1 | 9.06  | 10.44 | -2.61 | 5.34E-06 | 0.0013 | TBCEL             | tubulin folding cofactor E-like                         | Multiple_Complex |
| TSUnmapped000005( | 10.1  | 11.38 | -2.43 | 5.50E-06 | 0.0013 | MLXIP             | MLX interacting protein                                 | NonCoding        |
| TC1900009625.hg.1 | 9.95  | 11.46 | -2.84 | 5.57E-06 | 0.0013 | ICAM3             | intercellular adhesion molecule 3                       | Multiple_Complex |
| TC0600011232.hg.1 | 8.24  | 6.61  | 3.11  | 5.78E-06 | 0.0013 | HIST1H1B          | histone cluster 1, H1b                                  | Multiple_Complex |
| TSUnmapped000001( | 9.58  | 11.16 | -2.99 | 5.98E-06 | 0.0014 | MLXIP             | MLX interacting protein                                 | NonCoding        |
| TC0100008815.hg.1 | 14.02 | 8.13  | 59.44 | 6.02E-06 | 0.0014 | IFI44L            | interferon-induced protein 44-like                      | Multiple_Complex |
| TC0400012857.hg.1 | 8.92  | 9.89  | -1.95 | 6.35E-06 | 0.0014 | RAPGEF2           | Rap guanine nucleotide exchange factor 2                | Multiple_Complex |
| TC1100006876.hg.1 | 5.51  | 6.82  | -2.48 | 6.37E-06 | 0.0014 | MICALCL           | MICAL C-terminal like                                   | Multiple_Complex |
| TC1800006448.hg.1 | 7.14  | 5.77  | 2.59  | 6.41E-06 | 0.0014 | TYMS              | thymidylate synthetase                                  | Multiple_Complex |
| TC1900007679.hg.1 | 7.32  | 6.42  | 1.86  | 6.70E-06 | 0.0015 | PLEKHF1           | pleckstrin homology domain containing, family F (wit    | Coding           |
| TC0700010796.hg.1 | 10.88 | 11.59 | -1.63 | 7.26E-06 | 0.0016 | VPS41             | vacuolar protein sorting 41 homolog (S. cerevisiae)     | Multiple_Complex |
| TC1400009147.hg.1 | 10.97 | 12.47 | -2.83 | 7.48E-06 | 0.0016 | PYGL              | phosphorylase, glycogen, liver                          | Multiple_Complex |
| TC0600011233.hg.1 | 8.32  | 7.22  | 2.14  | 7.60E-06 | 0.0016 | HIST1H3I          | histone cluster 1, H3i                                  | Coding           |
| TC0300006925.hg.1 | 13.08 | 13.9  | -1.76 | 7.62E-06 | 0.0016 | TGFBR2            | transforming growth factor beta receptor II             | Multiple_Complex |
| TC1000006802.hg.1 | 7.58  | 9.23  | -3.14 | 7.69E-06 | 0.0016 | CAMK1D            | calcium/calmodulin-dependent protein kinase ID          | Multiple_Complex |
| TC1100012121.hg.1 | 17.6  | 15.71 | 3.72  | 7.80E-06 | 0.0016 | TMEM123           | transmembrane protein 123                               | Multiple_Complex |
| TC0400012366.hg.1 | 11.57 | 9.08  | 5.63  | 7.94E-06 | 0.0016 | DDX60             | DEAD (Asp-Glu-Ala-Asp) box polypeptide 60               | Multiple_Complex |
| TC0400010612.hg.1 | 5.9   | 7.09  | -2.29 | 7.95E-06 | 0.0016 | NFXL1             | nuclear transcription factor, X-box binding-like 1      | Multiple_Complex |
| TC1100013015.hg.1 | 8.93  | 10.01 | -2.11 | 8.36E-06 | 0.0017 | MS4A14            | membrane-spanning 4-domains, subfamily A, membe         | Multiple_Complex |
| TC0600008379.hg.1 | 14.05 | 13.16 | 1.85  | 8.45E-06 | 0.0017 | MTRNR2L9          | MT-RNR2-like 9                                          | Multiple_Complex |
| TC0500013392.hg.1 | 8.62  | 10.88 | -4.79 | 8.51E-06 | 0.0017 | CCNJL             | cyclin J-like                                           | Multiple_Complex |
| TC0900009933.hg.1 | 7.83  | 9.04  | -2.31 | 8.59E-06 | 0.0017 | FAM214B           | family with sequence similarity 214, member B           | Multiple_Complex |
| TC0500009751.hg.1 | 9.62  | 8.92  | 1.62  | 8.69E-06 | 0.0017 | BTNL9             | butyrophilin-like 9                                     | Multiple_Complex |
| TC1000010699.hg.1 | 11.16 | 12.08 | -1.88 | 9.03E-06 | 0.0017 | IPMK              | inositol polyphosphate multikinase                      | Multiple_Complex |
| TC1100011184.hg.1 | 9.7   | 10.86 | -2.23 | 9.14E-06 | 0.0017 | SF1               | Memczak2013 ALT_ACCEPTOR, ALT_DONOR, coding, NonCoding  | Multiple_Complex |
| TC1900009316.hg.1 | 15.38 | 16.48 | -2.15 | 9.41E-06 | 0.0018 | EEF2; SNORD37     | eukaryotic translation elongation factor 2; small nucl  | Multiple_Complex |
| TC0700009394.hg.1 | 8.2   | 7.35  | 1.8   | 9.52E-06 | 0.0018 | AGK               | acylglycerol kinase                                     | Multiple_Complex |
| TC1200007887.hg.1 | 7.89  | 8.62  | -1.66 | 9.96E-06 | 0.0018 | MBD6              | methyl-CpG binding domain protein 6                     | Multiple_Complex |
| TC0800007027.hg.1 | 13.63 | 15.18 | -2.92 | 1.01E-05 | 0.0018 | SLC25A37          | solute carrier family 25 (mitochondrial iron transport  | Multiple_Complex |
| TC1200008895.hg.1 | 11.31 | 10.56 | 1.68  | 1.01E-05 | 0.0018 | MAPKAPK5; ADAI    | mitogen-activated protein kinase-activated protein k    | Multiple_Complex |
| TC1700009256.hg.1 | 9.85  | 10.95 | -2.15 | 1.08E-05 | 0.0019 | NARF              | nuclear prelamin A recognition factor                   | Multiple_Complex |
| TC2000009970.hg.1 | 13.42 | 15.03 | -3.05 | 1.12E-05 | 0.002  | SIRPB1            | signal-regulatory protein beta 1                        | Multiple_Complex |
| TC1600008007.hg.1 | 9.73  | 11.03 | -2.45 | 1.14E-05 | 0.002  | ADGRG3            | adhesion G protein-coupled receptor G3                  | Multiple_Complex |
| TC1700012313.hg.1 | 9.31  | 8.44  | 1.83  | 1.17E-05 | 0.002  | MRPL12            | mitochondrial ribosomal protein L12                     | Multiple_Complex |
| TC0400011291.hg.1 | 7.65  | 6.29  | 2.57  | 1.19E-05 | 0.0021 | HERC6             | Memczak2013 ANTISENSE, coding, INTERNAL, introni        | NonCoding        |
| TC0600007290.hg.1 | 8.39  | 7.35  | 2.05  | 1.20E-05 | 0.0021 | HIST1H2BH         | histone cluster 1, H2bh                                 | Coding           |
| TC2200009218.hg.1 | 6.19  | 5.39  | 1.74  | 1.21E-05 | 0.0021 | MIR650; IGLV3-9;  | microRNA 650; immunoglobulin lambda variable 3-9        | Multiple_Complex |
| TSUnmapped000002( | 9.83  | 9.2   | 1.54  | 1.22E-05 | 0.0021 | KAT6B             | K(lysine) acetyltransferase 6B                          | NonCoding        |
| TC0900010444.hg.1 | 8.96  | 8.3   | 1.58  | 1.24E-05 | 0.0021 | CARNMT1           | carnosine N-methyltransferase 1                         | Multiple_Complex |
| TC0800008940.hg.1 | 10.36 | 11.05 | -1.61 | 1.24E-05 | 0.0021 | PHF20L1           | PHD finger protein 20-like 1                            | Multiple_Complex |
| TC0600007585.hg.1 | 10.06 | 9.01  | 2.07  | 1.28E-05 | 0.0021 | MICB              | MHC class I polypeptide-related sequence B              | Multiple_Complex |
| TC0300010966.hg.1 | 7.06  | 6.26  | 1.75  | 1.28E-05 | 0.0021 | CCDC12            | coiled-coil domain containing 12                        | Multiple_Complex |
| TC1700007931.hg.1 | 8.16  | 7.18  | 1.96  | 1.29E-05 | 0.0021 | IFI35             | interferon-induced protein 35                           | Multiple_Complex |
| TC1700007451.hg.1 | 9.76  | 11.18 | -2.66 | 1.32E-05 | 0.0021 | CPD               | carboxypeptidase D                                      | Multiple_Complex |
| TC1100009309.hg.1 | 13.35 | 14.84 | -2.81 | 1.33E-05 | 0.0021 | SORL1             | sortilin-related receptor, L(DLR class) A repeats conta | Multiple_Complex |
| TC2100008168.hg.1 | 9.18  | 8.57  | 1.53  | 1.35E-05 | 0.0021 | HMGN1             | high mobility group nucleosome binding domain 1         | Multiple_Complex |
| TC0100013445.hg.1 | 13.53 | 8.97  | 23.61 | 1.36E-05 | 0.0021 | IFI6              | interferon, alpha-inducible protein 6                   | Multiple_Complex |
| TC1900011729.hg.1 | 8.81  | 7.97  | 1.79  | 1.38E-05 | 0.0022 | TIMM50            | translocase of inner mitochondrial membrane 50 hor      | Multiple_Complex |
| TC0900008482.hg.1 | 10.11 | 10.92 | -1.76 | 1.41E-05 | 0.0022 | SLC31A2           | solute carrier family 31 (copper transporter), membe    | Multiple_Complex |

|                   |       |       |       |          |        |         |                                                       |                  |
|-------------------|-------|-------|-------|----------|--------|---------|-------------------------------------------------------|------------------|
| TC0100016112.hg.1 | 13.98 | 15.23 | -2.38 | 1.44E-05 | 0.0022 | TAGLN2  | transgelin 2                                          | Multiple_Complex |
| TC0700007034.hg.1 | 15.44 | 17.28 | -3.58 | 1.45E-05 | 0.0022 | CREB5   | cAMP responsive element binding protein 5             | Multiple_Complex |
| TC0200016402.hg.1 | 12.94 | 8.14  | 27.98 | 1.45E-05 | 0.0022 | RSAD2   | radical S-adenosyl methionine domain containing 2     | Multiple_Complex |
| TC0500013235.hg.1 | 10.78 | 11.82 | -2.05 | 1.46E-05 | 0.0022 | FAM53C  | family with sequence similarity 53, member C          | Multiple_Complex |
| TC1400008764.hg.1 | 12.42 | 11.11 | 2.48  | 1.47E-05 | 0.0022 | GZMB    | granzyme B                                            | Coding           |
| TC0800012372.hg.1 | 8.45  | 7.76  | 1.61  | 1.48E-05 | 0.0022 | LY6E    | lymphocyte antigen 6 complex, locus E                 | NonCoding        |
| TC0800008943.hg.1 | 9.21  | 10.15 | -1.91 | 1.50E-05 | 0.0022 | PHF20L1 | Transcript Identified by AceView, Entrez Gene ID(s) 5 | Unassigned       |
| TC1200006629.hg.1 | 17.26 | 16.38 | 1.84  | 1.50E-05 | 0.0022 | GAPDH   | glyceraldehyde-3-phosphate dehydrogenase              | Multiple_Complex |
| TC1700012469.hg.1 | 14.13 | 13.36 | 1.7   | 1.50E-05 | 0.0022 | SUMO2   | small ubiquitin-like modifier 2                       | Multiple_Complex |
| TC1100013012.hg.1 | 10.96 | 12    | -2.06 | 1.61E-05 | 0.0023 | STX3    | syntaxin 3                                            | Multiple_Complex |
| TC0200013096.hg.1 | 14.12 | 13.35 | 1.71  | 1.63E-05 | 0.0023 | MOB1A   | MOB kinase activator 1A                               | Multiple_Complex |
| TC2100008424.hg.1 | 10.88 | 12.47 | -3.01 | 1.63E-05 | 0.0023 | SLC19A1 | solute carrier family 19 (folate transporter), member | Multiple_Complex |
| TC0900008750.hg.1 | 8.33  | 9.06  | -1.66 | 1.69E-05 | 0.0024 | GAPVD1  | GTPase activating protein and VPS9 domains 1          | Multiple_Complex |
| TC1100013062.hg.1 | 6.28  | 7.04  | -1.68 | 1.72E-05 | 0.0024 | NADSYN1 | NAD synthetase 1                                      | Multiple_Complex |
| TC0200010795.hg.1 | 10.48 | 12.23 | -3.37 | 1.72E-05 | 0.0024 | SLC11A1 | solute carrier family 11 (proton-coupled divalent met | Multiple_Complex |
| TC0100018097.hg.1 | 8.76  | 8.11  | 1.58  | 1.75E-05 | 0.0024 | ZNF496  | zinc finger protein 496                               | Multiple_Complex |
| TC0300013330.hg.1 | 8.33  | 9.86  | -2.89 | 1.83E-05 | 0.0025 | DCUN1D1 | DCN1, defective in cullin neddylation 1, domain cont  | Multiple_Complex |
| TC0400010961.hg.1 | 13.74 | 10.22 | 11.51 | 1.83E-05 | 0.0025 | JCHAIN  | joining chain of multimeric IgA and IgM               | Multiple_Complex |
| TC1700010827.hg.1 | 9.5   | 7.84  | 3.16  | 1.85E-05 | 0.0025 | GRN     | Memczak2013 ANTISENSE, CDS, coding, INTERNAL be       | NonCoding        |
| TC0400012856.hg.1 | 6.62  | 7.42  | -1.73 | 1.86E-05 | 0.0025 | RAPGEF2 | Rap guanine nucleotide exchange factor 2              | NonCoding        |
| TC1800006889.hg.1 | 10.46 | 12.69 | -4.69 | 1.89E-05 | 0.0026 | RIOK3   | RIO kinase 3                                          | Multiple_Complex |
| TC0100007243.hg.1 | 8.78  | 11.78 | -7.99 | 1.91E-05 | 0.0026 | ALPL    | alkaline phosphatase, liver/bone/kidney               | Multiple_Complex |
| TC0900011754.hg.1 | 8.92  | 8.33  | 1.5   | 1.93E-05 | 0.0026 | QRF1    | pyroglutamylated RFamide peptide                      | Coding           |
| TC1000012510.hg.1 | 5.82  | 5.16  | 1.59  | 1.97E-05 | 0.0026 | ZNF511  | zinc finger protein 511                               | Multiple_Complex |
| TC1100008041.hg.1 | 13.31 | 11.82 | 2.8   | 2.05E-05 | 0.0027 | CTSW    | cathepsin W                                           | Multiple_Complex |
| TC0300012339.hg.1 | 4.35  | 5.3   | -1.93 | 2.06E-05 | 0.0027 | GATA2   | GATA binding protein 2                                | Multiple_Complex |
| TC1500009904.hg.1 | 11.33 | 12.72 | -2.61 | 2.11E-05 | 0.0027 | TLE3    | transducin-like enhancer of split 3                   | Multiple_Complex |
| TC1900011399.hg.1 | 11.03 | 12.44 | -2.65 | 2.11E-05 | 0.0027 | MBOAT7  | membrane bound O-acyltransferase domain containi      | Multiple_Complex |
| TC0200016559.hg.1 | 4.56  | 5.09  | -1.44 | 2.11E-05 | 0.0027 | BBS5    | Bardet-Biedl syndrome 5                               | Multiple_Complex |
| TC1800007198.hg.1 | 8.51  | 10.65 | -4.4  | 2.12E-05 | 0.0027 | SLC14A1 | solute carrier family 14 (urea transporter), member 1 | Multiple_Complex |
| TC1300006683.hg.1 | 13.25 | 12.4  | 1.8   | 2.22E-05 | 0.0028 | GTF3A   | general transcription factor IIIA                     | Multiple_Complex |
| TC0700010376.hg.1 | 9.73  | 10.61 | -1.83 | 2.27E-05 | 0.0029 | SNX13   | sorting nexin 13                                      | Multiple_Complex |
| TC0100007484.hg.1 | 14.81 | 15.99 | -2.27 | 2.32E-05 | 0.0029 | ZDHC18  | zinc finger, DHHC-type containing 18                  | Multiple_Complex |
| TC0100012329.hg.1 | 9.1   | 11.08 | -3.96 | 2.34E-05 | 0.0029 | OR2W3   | olfactory receptor, family 2, subfamily W, member 3   | Coding           |
| TC1700008738.hg.1 | 6.01  | 6.98  | -1.95 | 2.40E-05 | 0.003  | PRKAR1A | Memczak2013 ALT_ACCEPTOR, ALT_DONOR, coding,          | NonCoding        |
| TC2100008462.hg.1 | 7.98  | 7.37  | 1.52  | 2.40E-05 | 0.003  | LSS     | lanosterol synthase (2,3-oxidosqualene-lanosterol cy  | Multiple_Complex |
| TC0500013124.hg.1 | 5.06  | 4.18  | 1.84  | 2.47E-05 | 0.003  | TRIM7   | tripartite motif containing 7                         | Multiple_Complex |
| TC0900010063.hg.1 | 6.38  | 7.93  | -2.92 | 2.48E-05 | 0.003  | CNTNAP3 | contactin associated protein-like 3                   | Multiple_Complex |
| TC0200015538.hg.1 | 12.61 | 14.06 | -2.73 | 2.49E-05 | 0.003  | KLF7    | Kruppel-like factor 7 (ubiquitous)                    | Multiple_Complex |
| TC1000012482.hg.1 | 11.26 | 12.43 | -2.24 | 2.51E-05 | 0.003  | ENTPD1  | ectonucleoside triphosphate diphosphohydrolase 1      | Multiple_Complex |
| TC0100017118.hg.1 | 8.05  | 9.55  | -2.83 | 2.53E-05 | 0.003  | YOD1    | YOD1 deubiquitinase                                   | Multiple_Complex |
| TC0300007278.hg.1 | 10.57 | 11.83 | -2.39 | 2.55E-05 | 0.003  | NBEAL2  | neurobeachin like 2                                   | Multiple_Complex |
| TC0100013471.hg.1 | 11.56 | 12.88 | -2.5  | 2.57E-05 | 0.003  | PTAFR   | platelet-activating factor receptor                   | Multiple_Complex |
| TC0300012132.hg.1 | 11.48 | 12.1  | -1.53 | 2.58E-05 | 0.003  | GSK3B   | glycogen synthase kinase 3 beta                       | Multiple_Complex |
| TC0200008268.hg.1 | 16.25 | 14.09 | 4.49  | 2.61E-05 | 0.0031 | GNLY    | granulysin                                            | Multiple_Complex |
| TC1700007904.hg.1 | 8.83  | 8.05  | 1.71  | 2.69E-05 | 0.0031 | TUBG1   | tubulin, gamma 1                                      | Multiple_Complex |
| TC0600009843.hg.1 | 5.8   | 6.7   | -1.86 | 2.74E-05 | 0.0032 | PLEKHG1 | pleckstrin homology domain containing, family G (wi   | Multiple_Complex |
| TC0100014947.hg.1 | 12.11 | 11.59 | 1.43  | 2.80E-05 | 0.0032 | TMED5   | transmembrane p24 trafficking protein 5               | Multiple_Complex |
| TC0500007088.hg.1 | 9.63  | 8.7   | 1.9   | 2.81E-05 | 0.0032 | TARS    | threonyl-tRNA synthetase                              | Multiple_Complex |
| TC0200016115.hg.1 | 10.68 | 9.65  | 2.04  | 3.00E-05 | 0.0034 | ARL4C   | ADP-ribosylation factor like GTPase 4C                | Multiple_Complex |
| TC0100007463.hg.1 | 12.42 | 11.6  | 1.77  | 3.03E-05 | 0.0034 | HMGN2   | high mobility group nucleosomal binding domain 2      | Multiple_Complex |
| TC1200011711.hg.1 | 9.97  | 9.24  | 1.66  | 3.05E-05 | 0.0034 | GNPTAB  | N-acetylglucosamine-1-phosphate transferase, alpha    | Multiple_Complex |
| TC2000009602.hg.1 | 10.41 | 8.58  | 3.56  | 3.06E-05 | 0.0034 | ZBP1    | Z-DNA binding protein 1                               | Multiple_Complex |
| TC1900007431.hg.1 | 7.85  | 8.53  | -1.6  | 3.20E-05 | 0.0036 | MAU2    | MAU2 sister chromatid cohesion factor                 | Multiple_Complex |
| TC0200009955.hg.1 | 8.18  | 9.76  | -3    | 3.22E-05 | 0.0036 | CYBRD1  | cytochrome b reductase 1                              | Multiple_Complex |
| TC1900008419.hg.1 | 7.77  | 8.88  | -2.16 | 3.24E-05 | 0.0036 | C5AR2   | complement component 5a receptor 2                    | Multiple_Complex |
| TC2000009874.hg.1 | 14.72 | 16.72 | -4    | 3.25E-05 | 0.0036 | PSMF1   | proteasome inhibitor subunit 1                        | Multiple_Complex |
| TC2000006861.hg.1 | 7.95  | 6.83  | 2.16  | 3.30E-05 | 0.0036 | RIN2    | Ras and Rab interactor 2                              | Multiple_Complex |
| TC1900009832.hg.1 | 12.22 | 13.81 | -3.02 | 3.30E-05 | 0.0036 | ADGRE3  | adhesion G protein-coupled receptor E3                | Coding           |
| TC0100015866.hg.1 | 11.14 | 10.07 | 2.11  | 3.35E-05 | 0.0036 | S100A4  | S100 calcium binding protein A4                       | Multiple_Complex |
| TC0700013597.hg.1 | 5.67  | 6.24  | -1.49 | 3.38E-05 | 0.0036 | SAP25   | Sin3A associated protein 25kDa                        | Multiple_Complex |
| TC1900010633.hg.1 | 9.62  | 8.97  | 1.57  | 3.39E-05 | 0.0036 | CCER2   | coiled-coil glutamate rich protein 2                  | Coding           |
| TC0900011838.hg.1 | 7.1   | 6.43  | 1.58  | 3.43E-05 | 0.0037 | SURF6   | surfeit 6                                             | Multiple_Complex |
| TC1900011821.hg.1 | 9.82  | 10.52 | -1.62 | 3.44E-05 | 0.0037 | ZNF776  | zinc finger protein 776                               | Multiple_Complex |
| TC1000012561.hg.1 | 13.08 | 13.95 | -1.84 | 3.47E-05 | 0.0037 | JMJD1C  | jumonji domain containing 1C                          | Multiple_Complex |
| TC0100006989.hg.1 | 9.11  | 9.79  | -1.6  | 3.60E-05 | 0.0038 | DNAJC16 | DnaJ (Hsp40) homolog, subfamily C, member 16          | Multiple_Complex |
| TC1900007882.hg.1 | 5.4   | 6.32  | -1.89 | 3.60E-05 | 0.0038 | PROSER3 | proline and serine rich 3                             | Multiple_Complex |
| TC1900011958.hg.1 | 7.24  | 7.93  | -1.61 | 3.63E-05 | 0.0038 | ERF     | Ets2 repressor factor                                 | Multiple_Complex |
| TC0100011406.hg.1 | 17.64 | 18.27 | -1.55 | 3.64E-05 | 0.0038 | CD55    | CD55 molecule, decay accelerating factor for comple   | Multiple_Complex |
| TC1800008776.hg.1 | 9.09  | 10.96 | -3.66 | 3.78E-05 | 0.0038 | FECH    | ferrochelatase                                        | Multiple_Complex |
| TC0300013934.hg.1 | 7.62  | 8.6   | -1.98 | 3.80E-05 | 0.0038 | EMC3    | ER membrane protein complex subunit 3                 | Multiple_Complex |
| TC1100007866.hg.1 | 7.45  | 6.89  | 1.48  | 3.80E-05 | 0.0038 | UQC3    | ubiquinol-cytochrome c reductase complex assembly     | Multiple_Complex |

|                    |       |       |       |          |        |                 |                                                        |                  |
|--------------------|-------|-------|-------|----------|--------|-----------------|--------------------------------------------------------|------------------|
| TC0200016682.hg.1  | 11.92 | 13.12 | -2.29 | 3.81E-05 | 0.0038 | PPP3R1          | protein phosphatase 3, regulatory subunit B, alpha     | Coding           |
| TC0100016158.hg.1  | 6.89  | 6.41  | 1.39  | 3.81E-05 | 0.0038 | PFDN2           | prefoldin subunit 2                                    | Multiple_Complex |
| TC0600014235.hg.1  | 9.1   | 7.78  | 2.49  | 3.82E-05 | 0.0038 | BLOC1S5-TXNDC5  | BLOC1S5-TXNDC5 readthrough (NMD candidate)             | Multiple_Complex |
| TC1200008771.hg.1  | 9.96  | 10.67 | -1.63 | 4.01E-05 | 0.004  | ISCU            | iron-sulfur cluster assembly enzyme                    | Multiple_Complex |
| TC0500009061.hg.1  | 6.51  | 7.21  | -1.62 | 4.11E-05 | 0.0041 | PCYOX1L         | prenylcysteine oxidase 1 like                          | Multiple_Complex |
| TC0600011135.hg.1  | 6.69  | 5.74  | 1.92  | 4.16E-05 | 0.0041 | HIST1H3D; HIST1 | histone cluster 1, H3d; histone cluster 1, H2ad        | Multiple_Complex |
| TC0300007194.hg.1  | 7.64  | 8.72  | -2.11 | 4.20E-05 | 0.0041 | ABHD5           | abhydrolase domain containing 5                        | Multiple_Complex |
| TC1600011545.hg.1  | 7.83  | 7.01  | 1.76  | 4.20E-05 | 0.0041 | PLLP            | plasmolipin                                            | NonCoding        |
| TC0700009827.hg.1  | 12.09 | 12.78 | -1.61 | 4.21E-05 | 0.0041 | RBM33           | RNA binding motif protein 33                           | Multiple_Complex |
| TC1500008360.hg.1  | 9.81  | 10.71 | -1.87 | 4.21E-05 | 0.0041 | SLCO3A1         | solute carrier organic anion transporter family, mem   | Multiple_Complex |
| TC0600009094.hg.1  | 6.55  | 7.3   | -1.69 | 4.24E-05 | 0.0041 | SMPD2           | sphingomyelin phosphodiesterase 2, neutral membr       | Multiple_Complex |
| TC0800010765.hg.1  | 14.64 | 14.07 | 1.48  | 4.34E-05 | 0.0042 | TRAM1           | translocation associated membrane protein 1            | Multiple_Complex |
| TC0100008025.hg.1  | 14.76 | 15.9  | -2.21 | 4.38E-05 | 0.0042 | YBX1            | Y box binding protein 1                                | Multiple_Complex |
| TC0800009529.hg.1  | 7.84  | 9.12  | -2.44 | 4.70E-05 | 0.0045 | PPP1R3B         | protein phosphatase 1, regulatory subunit 3B           | Coding           |
| TC1700012249.hg.1  | 7.46  | 6.91  | 1.46  | 4.71E-05 | 0.0045 | MIR4728; ERBB2  | microRNA 4728; erb-b2 receptor tyrosine kinase 2       | Multiple_Complex |
| TC2000008279.hg.1  | 8.1   | 7.04  | 2.09  | 4.79E-05 | 0.0045 | PCNA            | proliferating cell nuclear antigen                     | Multiple_Complex |
| TC0400011383.hg.1  | 9.57  | 11.96 | -5.26 | 4.81E-05 | 0.0045 | TSPAN5          | tetraspanin 5                                          | Multiple_Complex |
| TC0300009799.hg.1  | 8.08  | 6.32  | 3.38  | 4.84E-05 | 0.0045 | RTP4            | receptor (chemosensory) transporter protein 4          | Coding           |
| TC0400012019.hg.1  | 6.6   | 9.14  | -5.81 | 4.84E-05 | 0.0045 | GYP A           | glycophorin A (MNS blood group)                        | Multiple_Complex |
| TC0100008816.hg.1  | 11.68 | 7.88  | 13.96 | 4.90E-05 | 0.0046 | IFI44           | interferon-induced protein 44                          | Multiple_Complex |
| TC0800007080.hg.1  | 16.63 | 18.48 | -3.61 | 4.92E-05 | 0.0046 | BNI3P3L         | BCL2/adenovirus E1B 19kDa interacting protein 3-like   | Multiple_Complex |
| TC1200012190.hg.1  | 10.43 | 8.26  | 4.49  | 4.94E-05 | 0.0046 | OASL            | 2-5-oligoadenylate synthetase-like                     | Multiple_Complex |
| TC0100010369.hg.1  | 10.74 | 11.6  | -1.81 | 4.96E-05 | 0.0046 | ATF6            | activating transcription factor 6                      | Multiple_Complex |
| TC1300008997.hg.1  | 8     | 9.5   | -2.83 | 5.06E-05 | 0.0046 | DHRS12          | dehydrogenase/reductase (SDR family) member 12         | Multiple_Complex |
| TC0100009572.hg.1  | 11.93 | 14.27 | -5.05 | 5.08E-05 | 0.0046 | FAM46C          | family with sequence similarity 46, member C           | Coding           |
| TC0800009239.hg.1  | 7.32  | 6.73  | 1.51  | 5.10E-05 | 0.0046 | CYC1            | cytochrome c-1                                         | Multiple_Complex |
| TC0200011720.hg.1  | 10.2  | 11.38 | -2.26 | 5.12E-05 | 0.0046 | ODC1; SNORA80E  | ornithine decarboxylase 1; small nucleolar RNA, H/At   | Multiple_Complex |
| TC0X00006581.hg.1  | 9.62  | 10.77 | -2.22 | 5.18E-05 | 0.0047 | TBL1X           | transducin (beta)-like 1X-linked                       | Multiple_Complex |
| TC2000009969.hg.1  | 8.73  | 9.79  | -2.09 | 5.24E-05 | 0.0047 | SIRPD           | signal-regulatory protein delta                        | Multiple_Complex |
| TC1600009102.hg.1  | 9.87  | 9.26  | 1.52  | 5.26E-05 | 0.0047 | RNPS1           | RNA binding protein S1, serine-rich domain             | Multiple_Complex |
| TC0600009789.hg.1  | 12.6  | 13.21 | -1.52 | 5.35E-05 | 0.0047 | TAB2            | TGF-beta activated kinase 1/MAP3K7 binding protein     | Multiple_Complex |
| TC0100013087.hg.1  | 9.39  | 8.56  | 1.77  | 5.36E-05 | 0.0047 | RCC2            | regulator of chromosome condensation 2                 | Multiple_Complex |
| TC1600009397.hg.1  | 6.14  | 5.57  | 1.48  | 5.57E-05 | 0.0049 | PRM3            | protamine 3                                            | Coding           |
| TC1300009229.hg.1  | 7.66  | 7.02  | 1.55  | 5.63E-05 | 0.005  | MZT1            | mitotic spindle organizing protein 1                   | Coding           |
| TC1700011436.hg.1  | 9.24  | 10.03 | -1.74 | 5.69E-05 | 0.005  | ERN1            | endoplasmic reticulum to nucleus signaling 1           | Multiple_Complex |
| TC0600011777.hg.1  | 13.5  | 14.95 | -2.73 | 5.82E-05 | 0.0051 | TREM1           | triggering receptor expressed on myeloid cells 1       | Multiple_Complex |
| TSUnmapped00000000 | 7.37  | 8.13  | -1.7  | 5.82E-05 | 0.0051 | DUSP16          | dual specificity phosphatase 16                        | Coding           |
| TC2200007427.hg.1  | 5     | 5.7   | -1.63 | 6.07E-05 | 0.0052 | TNRC6B          | Transcript Identified by AceView, Entrez Gene ID(s) 2  | Unassigned       |
| TC2100007452.hg.1  | 6.37  | 5.3   | 2.09  | 6.09E-05 | 0.0052 | COL6A2          | Jeck2013 ALT_ACCEPTOR, ALT_DONOR, coding, INTEI        | NonCoding        |
| TC0100010303.hg.1  | 6.37  | 5.42  | 1.94  | 6.10E-05 | 0.0052 | SLAMF6          | Memczak2013 ANTISENSE, coding, INTERNAL, introni       | NonCoding        |
| TC0200010410.hg.1  | 9.87  | 7.49  | 5.2   | 6.12E-05 | 0.0052 | SPATS2L         | spermatogenesis associated, serine-rich 2-like         | Multiple_Complex |
| TC0200009829.hg.1  | 13.17 | 14.39 | -2.34 | 6.14E-05 | 0.0052 | GCA             | grancalcin, EF-hand calcium binding protein            | Multiple_Complex |
| TC0600013914.hg.1  | 5.28  | 5.76  | -1.4  | 6.24E-05 | 0.0053 | GPR31           | G protein-coupled receptor 31                          | Multiple_Complex |
| TC0X00006626.hg.1  | 11.81 | 13.38 | -2.99 | 6.29E-05 | 0.0053 | TLR8            | toll-like receptor 8                                   | Coding           |
| TC0900011501.hg.1  | 4.98  | 5.64  | -1.58 | 6.46E-05 | 0.0054 | NR6A1           | nuclear receptor subfamily 6, group A, member 1        | Multiple_Complex |
| TC0600007067.hg.1  | 8.69  | 10.6  | -3.75 | 6.52E-05 | 0.0055 | GMPR            | guanosine monophosphate reductase                      | Multiple_Complex |
| TC0600008120.hg.1  | 8.54  | 10.41 | -3.66 | 6.53E-05 | 0.0055 | TMEM63B         | transmembrane protein 63B                              | Multiple_Complex |
| TC0300013859.hg.1  | 6.15  | 7.04  | -1.86 | 6.57E-05 | 0.0055 | CD200           | CD200 molecule                                         | Multiple_Complex |
| TC0100010140.hg.1  | 10.16 | 9.38  | 1.71  | 6.74E-05 | 0.0056 | SYT11           | synaptotagmin XI                                       | Coding           |
| TC1100008477.hg.1  | 11.51 | 12.87 | -2.56 | 6.78E-05 | 0.0056 | DGAT2           | diacylglycerol O-acyltransferase 2                     | Multiple_Complex |
| TC0600014083.hg.1  | 8.35  | 7.04  | 2.48  | 6.92E-05 | 0.0057 | HIST1H2AG       | histone cluster 1, H2ag                                | Coding           |
| TC2100008494.hg.1  | 14.25 | 14.91 | -1.57 | 6.99E-05 | 0.0057 | IFNAR2          | interferon (alpha, beta and omega) receptor 2          | Multiple_Complex |
| TC0X00007204.hg.1  | 7.88  | 9.04  | -2.23 | 7.17E-05 | 0.0058 | GATA1           | GATA binding protein 1 (globin transcription factor 1  | Multiple_Complex |
| TC0600011140.hg.1  | 7.16  | 6.16  | 1.99  | 7.18E-05 | 0.0058 | HIST1H3F        | histone cluster 1, H3f                                 | Coding           |
| TC0X00010880.hg.1  | 6.5   | 7.58  | -2.12 | 7.22E-05 | 0.0058 | MOSPD1          | motile sperm domain containing 1                       | Multiple_Complex |
| TC2200007909.hg.1  | 5.1   | 5.87  | -1.7  | 7.23E-05 | 0.0058 | MICAL3          | microtubule associated monoxygenase, calponin an       | Multiple_Complex |
| TC0100017471.hg.1  | 11.84 | 12.98 | -2.21 | 7.29E-05 | 0.0058 | WDR26; MIR4742  | WD repeat domain 26; microRNA 4742                     | Multiple_Complex |
| TC1600011515.hg.1  | 8.41  | 7.53  | 1.84  | 7.30E-05 | 0.0058 | AC009133.12; PA | novel transcript, antisense to C16orf53 and MVP; PA    | NonCoding        |
| TC0600011142.hg.1  | 6.57  | 5.16  | 2.66  | 7.44E-05 | 0.0059 | HIST1H3G        | histone cluster 1, H3g                                 | Coding           |
| TC0400006951.hg.1  | 12.74 | 11.22 | 2.88  | 7.48E-05 | 0.0059 | CD38            | CD38 molecule                                          | Multiple_Complex |
| TC0100012674.hg.1  | 5.65  | 5.06  | 1.51  | 7.51E-05 | 0.0059 | GPR153          | G protein-coupled receptor 153                         | Multiple_Complex |
| TC1000010925.hg.1  | 12.52 | 11.31 | 2.32  | 7.54E-05 | 0.0059 | PRF1            | perforin 1 (pore forming protein)                      | Multiple_Complex |
| TC1100009858.hg.1  | 10.56 | 11.39 | -1.78 | 7.59E-05 | 0.006  | CHRNA10; NUP98  | cholinergic receptor, nicotinic alpha 10; nucleoporin  | Multiple_Complex |
| TC0200016401.hg.1  | 6.93  | 5.94  | 1.99  | 7.64E-05 | 0.006  | RSAD2           | radical S-adenosyl methionine domain containing 2      | NonCoding        |
| TC0X00011223.hg.1  | 11.83 | 13.63 | -3.49 | 7.81E-05 | 0.0061 | MPP1            | membrane protein, palmitoylated 1                      | Multiple_Complex |
| TC0600007293.hg.1  | 5.13  | 4.3   | 1.77  | 7.83E-05 | 0.0061 | HIST1H2BI       | histone cluster 1, H2bi                                | Coding           |
| TC1600008146.hg.1  | 8.5   | 7.65  | 1.8   | 7.89E-05 | 0.0061 | HSF4; FBXL8     | heat shock transcription factor 4; F-box and leucine-r | Multiple_Complex |
| TC0100017094.hg.1  | 6.28  | 5.39  | 1.86  | 8.01E-05 | 0.0061 | FAM72A          | family with sequence similarity 72, member A           | Multiple_Complex |
| TC1700008719.hg.1  | 8.17  | 7.3   | 1.84  | 8.01E-05 | 0.0061 | KPNA2           | karyopherin alpha 2 (RAG cohort 1, importin alpha 1)   | Multiple_Complex |
| TC1900011775.hg.1  | 6.55  | 5.82  | 1.66  | 8.01E-05 | 0.0061 | GRWD1           | glutamate-rich WD repeat containing 1                  | Multiple_Complex |
| TC1200009242.hg.1  | 8.65  | 8.05  | 1.52  | 8.05E-05 | 0.0061 | SNRNP35         | small nuclear ribonucleoprotein, U11/U12 35kDa sub     | Multiple_Complex |
| TC0X00008230.hg.1  | 10.66 | 12.28 | -3.09 | 8.23E-05 | 0.0062 | IL13RA1         | interleukin 13 receptor, alpha 1                       | Multiple_Complex |

|                   |       |       |       |          |        |                  |                                                         |                  |
|-------------------|-------|-------|-------|----------|--------|------------------|---------------------------------------------------------|------------------|
| TC0X00011397.hg.1 | 5.69  | 5.04  | 1.57  | 8.24E-05 | 0.0062 | FAM127C          | family with sequence similarity 127, member C           | Coding           |
| TC0300008371.hg.1 | 5.41  | 6.76  | -2.56 | 8.26E-05 | 0.0062 | GRAMD1C          | GRAM domain containing 1C                               | Multiple_Complex |
| TC0100010310.hg.1 | 10.64 | 9.67  | 1.96  | 8.28E-05 | 0.0062 | SLAMF7           | SLAM family member 7                                    | Multiple_Complex |
| TC0100008621.hg.1 | 7.49  | 8.44  | -1.94 | 8.51E-05 | 0.0064 | LEPR; LEPROT     | leptin receptor; leptin receptor overlapping transcrip  | Multiple_Complex |
| TC1700011743.hg.1 | 7.96  | 8.63  | -1.59 | 8.98E-05 | 0.0067 | GGA3             | golgi-associated, gamma adaptin ear containing, ARF     | Multiple_Complex |
| TC0800009878.hg.1 | 11.65 | 12.21 | -1.47 | 9.02E-05 | 0.0067 | ENTPD4; LOXL2    | ectonucleoside triphosphate diphosphohydrolase 4;       | Multiple_Complex |
| TC1600010604.hg.1 | 6.01  | 5.35  | 1.58  | 9.05E-05 | 0.0067 | FAM96B           | family with sequence similarity 96, member B            | Multiple_Complex |
| TC1900009224.hg.1 | 6.47  | 7.07  | -1.51 | 9.08E-05 | 0.0067 | C19orf35         | chromosome 19 open reading frame 35                     | Coding           |
| TC0600014102.hg.1 | 11.8  | 10.84 | 1.94  | 9.10E-05 | 0.0067 | HCP5             | HLA complex P5 (non-protein coding)                     | Multiple_Complex |
| TC0600007380.hg.1 | 6.92  | 5.82  | 2.15  | 9.18E-05 | 0.0067 | HIST1H2AL; HIST1 | histone cluster 1, H2a; histone cluster 1, H2bn         | Multiple_Complex |
| TC0800007460.hg.1 | 10    | 10.75 | -1.68 | 9.21E-05 | 0.0067 | HGSNAT           | heparan-alpha-glucosaminide N-acetyltransferase         | Multiple_Complex |
| TC0400012150.hg.1 | 13.76 | 15.33 | -2.96 | 9.28E-05 | 0.0068 | TMEM154          | transmembrane protein 154                               | Multiple_Complex |
| TC1100013021.hg.1 | 7.09  | 6.37  | 1.65  | 9.36E-05 | 0.0068 | FEN1             | flap structure-specific endonuclease 1                  | Coding           |
| TC0700012658.hg.1 | 8.35  | 7.68  | 1.59  | 9.37E-05 | 0.0068 | CHCHD3           | coiled-coil-helix-coiled-coil-helix domain containing 3 | Multiple_Complex |
| TC2000008750.hg.1 | 7.71  | 7.17  | 1.46  | 9.37E-05 | 0.0068 | NANP             | N-acetylneuraminic acid phosphatase                     | Coding           |
| TC1500007303.hg.1 | 8.93  | 9.66  | -1.66 | 9.47E-05 | 0.0068 | PIGB             | phosphatidylinositol glycan anchor biosynthesis class   | Multiple_Complex |
| TC1900007891.hg.1 | 10.98 | 9.11  | 3.67  | 9.48E-05 | 0.0068 | HCST             | hematopoietic cell signal transducer                    | Multiple_Complex |
| TC0500007163.hg.1 | 11.15 | 11.83 | -1.6  | 9.53E-05 | 0.0068 | NIPBL            | Nipped-B homolog (Drosophila)                           | Multiple_Complex |
| TC1200012807.hg.1 | 7.11  | 6.45  | 1.57  | 9.57E-05 | 0.0068 | STAC3            | SH3 and cysteine rich domain 3                          | Multiple_Complex |
| TC1500010463.hg.1 | 5.07  | 4.43  | 1.56  | 9.59E-05 | 0.0068 | PRC1             | protein regulator of cytokinesis 1                      | Multiple_Complex |
| TC0700011166.hg.1 | 10.81 | 10.07 | 1.68  | 9.65E-05 | 0.0068 | CHCHD2           | coiled-coil-helix-coiled-coil-helix domain containing 2 | Multiple_Complex |
| TC0800011074.hg.1 | 5.71  | 6.36  | -1.56 | 9.67E-05 | 0.0068 | C8orf88          | chromosome 8 open reading frame 88                      | Multiple_Complex |
| TC0100016447.hg.1 | 11.46 | 12.24 | -1.72 | 9.74E-05 | 0.0069 | RC3H1            | ring finger and CCCH-type domains 1                     | Multiple_Complex |
| TC1000008382.hg.1 | 6.79  | 8.04  | -2.39 | 9.86E-05 | 0.0069 | LIPN             | lipase, family member N                                 | Coding           |
| TSUnmapped000006: | 8.53  | 7.74  | 1.73  | 0.0001   | 0.0071 | LRIG1            |                                                         | Coding           |
| TC1600010618.hg.1 | 5.84  | 5.47  | 1.29  | 0.0001   | 0.0071 | EXOC3L1          | exocyst complex component 3-like 1                      | Multiple_Complex |
| TC0100011197.hg.1 | 4.17  | 5.44  | -2.4  | 0.0001   | 0.0071 | SHISA4           | shisa family member 4                                   | Multiple_Complex |
| TC2000007817.hg.1 | 8.93  | 10.14 | -2.31 | 0.0001   | 0.0072 | FAM210B          | family with sequence similarity 210, member B           | Multiple_Complex |
| TC2000007288.hg.1 | 5.85  | 5.39  | 1.38  | 0.0001   | 0.0074 | NNAT             | neuronatin                                              | Multiple_Complex |
| TC1600007741.hg.1 | 6.15  | 6.92  | -1.71 | 0.0001   | 0.0074 | PHKB             | Transcript Identified by AceView, Entrez Gene ID(s) 5   | Unassigned       |
| TC1400007354.hg.1 | 12.46 | 13.56 | -2.15 | 0.0001   | 0.0074 | PPM1A            | protein phosphatase, Mg2+/Mn2+ dependent, 1A            | Multiple_Complex |
| TC0500008544.hg.1 | 9.05  | 8.03  | 2.02  | 0.0001   | 0.0074 | LMNB1            | lamin B1                                                | Multiple_Complex |
| TC0300013639.hg.1 | 9.72  | 9.1   | 1.54  | 0.0001   | 0.0074 | PPP1R2           | protein phosphatase 1, regulatory (inhibitor) subunit   | Multiple_Complex |
| TC1700011097.hg.1 | 7.87  | 7.16  | 1.64  | 0.0001   | 0.0074 | LRRCS9           | leucine rich repeat containing 59                       | Multiple_Complex |
| TC0300013990.hg.1 | 4.64  | 5.31  | -1.59 | 0.0001   | 0.0074 | TLR9             | toll-like receptor 9                                    | Coding           |
| TC0100013602.hg.1 | 6.87  | 7.88  | -2.02 | 0.0001   | 0.0075 | TMEM234          | transmembrane protein 234                               | Multiple_Complex |
| TC1100013028.hg.1 | 9.61  | 9.07  | 1.45  | 0.0001   | 0.0075 | OTUB1            | OTU deubiquitinase, ubiquitin aldehyde binding 1        | Multiple_Complex |
| TC0500009562.hg.1 | 9.86  | 10.98 | -2.18 | 0.0001   | 0.0075 | HRH2             | histamine receptor H2                                   | Multiple_Complex |
| TC0600011553.hg.1 | 8.4   | 7.72  | 1.61  | 0.0001   | 0.0076 | BAK1             | BCL2-antagonist/killer 1                                | Multiple_Complex |
| TC1700006738.hg.1 | 13.52 | 12.78 | 1.67  | 0.0001   | 0.0076 | EIF5A            | eukaryotic translation initiation factor 5A             | Multiple_Complex |
| TC1900008432.hg.1 | 4.78  | 5.34  | -1.47 | 0.0001   | 0.0076 | EHD2             | EH domain containing 2                                  | Multiple_Complex |
| TC0600011535.hg.1 | 10.14 | 11.3  | -2.24 | 0.0001   | 0.0076 | RGL2             | ral guanine nucleotide dissociation stimulator-like 2   | Multiple_Complex |
| TC1200011385.hg.1 | 6.86  | 8.29  | -2.69 | 0.0001   | 0.0076 | LIN7A            | lin-7 homolog A (C. elegans)                            | Multiple_Complex |
| TC1600009202.hg.1 | 13    | 14.18 | -2.26 | 0.0001   | 0.0076 | CREBBP           | CREB binding protein                                    | Multiple_Complex |
| TC1900009608.hg.1 | 10    | 9.42  | 1.5   | 0.0001   | 0.0076 | EIF3G            | eukaryotic translation initiation factor 3, subunit G   | Multiple_Complex |
| TC0600012072.hg.1 | 14.38 | 15.2  | -1.77 | 0.0001   | 0.0076 | ELOVL5           | ELOVL fatty acid elongase 5                             | Multiple_Complex |
| TC0500007314.hg.1 | 11.37 | 10.61 | 1.69  | 0.0001   | 0.0078 | MRPS30           | mitochondrial ribosomal protein S30                     | Multiple_Complex |
| TC0X00006446.hg.1 | 10.37 | 11.42 | -2.07 | 0.0001   | 0.0078 | CSF2RA           | colony stimulating factor 2 receptor, alpha, low-affin  | Multiple_Complex |
| TC0700010585.hg.1 | 10.15 | 11.79 | -3.11 | 0.0001   | 0.0078 | JAZF1            | JAZF zinc finger 1                                      | Multiple_Complex |
| TC1900007173.hg.1 | 14.24 | 15.12 | -1.85 | 0.0001   | 0.0078 | ADGRE5           | adhesion G protein-coupled receptor E5                  | Multiple_Complex |
| TC0800008198.hg.1 | 4.3   | 5.26  | -1.95 | 0.0001   | 0.0078 | OTUD6B           | Transcript Identified by AceView, Entrez Gene ID(s) 5   | Unassigned       |
| TC0500011280.hg.1 | 9.5   | 8.53  | 1.96  | 0.0001   | 0.0078 | DHFR             | dihydrofolate reductase                                 | Multiple_Complex |
| TC0300009727.hg.1 | 6.05  | 7.08  | -2.04 | 0.0001   | 0.0078 | VPS8             | Transcript Identified by AceView, Entrez Gene ID(s) 2   | Unassigned       |
| TC1100009245.hg.1 | 10.19 | 11.14 | -1.92 | 0.0001   | 0.0078 | CBL              | Cbl proto-oncogene, E3 ubiquitin protein ligase         | Multiple_Complex |
| TC1600009530.hg.1 | 10.97 | 12.24 | -2.41 | 0.0001   | 0.0078 | KIAA0430; MIR65  | KIAA0430; microRNA 6506                                 | Multiple_Complex |
| TC0600014055.hg.1 | 7.98  | 9.44  | -2.75 | 0.0001   | 0.0078 | NQO2             | NAD(P)H dehydrogenase, quinone 2                        | Multiple_Complex |
| TC0600014074.hg.1 | 8.95  | 9.62  | -1.6  | 0.0001   | 0.0078 | HIVEP1           | human immunodeficiency virus type I enhancer bind       | Multiple_Complex |
| TC0900010387.hg.1 | 6.62  | 7.44  | -1.77 | 0.0001   | 0.0078 | TMEM2            | Transcript Identified by AceView, Entrez Gene ID(s) 2   | Unassigned       |
| TC0600011773.hg.1 | 9.48  | 10.87 | -2.62 | 0.0001   | 0.0078 | TREML2           | triggering receptor expressed on myeloid cells-like 2   | Coding           |
| TC0300014095.hg.1 | 5.66  | 5.03  | 1.55  | 0.0001   | 0.0078 | TM4SF19          | transmembrane 4 L six family member 19                  | Multiple_Complex |
| TC1100013186.hg.1 | 10.32 | 11.23 | -1.87 | 0.0001   | 0.0079 | SYVN1            | synovial apoptosis inhibitor 1, synoviolin              | Multiple_Complex |
| TC0600010565.hg.1 | 5.67  | 6.41  | -1.67 | 0.0001   | 0.0079 | TUBB2A           | tubulin, beta 2A class IIa                              | Multiple_Complex |
| TC0700009256.hg.1 | 10.76 | 12.13 | -2.58 | 0.0001   | 0.0079 | C7orf73          | chromosome 7 open reading frame 73                      | Multiple_Complex |
| TC1000007275.hg.1 | 10.36 | 11.02 | -1.58 | 0.0001   | 0.0079 | CNCY             | cyclin Y                                                | Multiple_Complex |
| TC0X00008794.hg.1 | 11.79 | 14.68 | -7.44 | 0.0001   | 0.008  | SLC6A8           | solute carrier family 6 (neurotransmitter transporter)  | Multiple_Complex |
| TC0Y00006444.hg.1 | 10.58 | 11.58 | -2    | 0.0001   | 0.008  | CSF2RA           | colony stimulating factor 2 receptor, alpha, low-affin  | Multiple_Complex |
| TC0600010962.hg.1 | 13.29 | 12.43 | 1.82  | 0.0001   | 0.008  | DEK              | DEK proto-oncogene                                      | Multiple_Complex |
| TC1500010730.hg.1 | 7.97  | 7.47  | 1.41  | 0.0001   | 0.0082 | HYPK             | huntingtin interacting protein K                        | Multiple_Complex |
| TC1900011012.hg.1 | 7.64  | 6.98  | 1.58  | 0.0001   | 0.0083 | TMEM160          | transmembrane protein 160                               | Multiple_Complex |
| TC1700006758.hg.1 | 10.86 | 10.07 | 1.74  | 0.0001   | 0.0083 | MPDU1            | mannose-P-dolichol utilization defect 1                 | Multiple_Complex |
| TC1700010599.hg.1 | 9.04  | 8.26  | 1.72  | 0.0001   | 0.0083 | MED24; MIR6884   | mediator complex subunit 24; microRNA 6884              | Multiple_Complex |
| TC1500007034.hg.1 | 12.49 | 13.3  | -1.76 | 0.0001   | 0.0084 | SNAP23           | synaptosome associated protein 23kDa                    | Multiple_Complex |

|                   |       |       |       |        |        |                |                                                        |                  |
|-------------------|-------|-------|-------|--------|--------|----------------|--------------------------------------------------------|------------------|
| TC1700012387.hg.1 | 9.84  | 8.6   | 2.36  | 0.0001 | 0.0084 | SLFN12L        | schlafen family member 12-like                         | Multiple_Complex |
| TC1000010497.hg.1 | 12.33 | 14.31 | -3.94 | 0.0001 | 0.0084 | 8-Mar          | membrane associated ring finger 8                      | Multiple_Complex |
| TC0200007296.hg.1 | 8.44  | 7.52  | 1.89  | 0.0001 | 0.0084 | GALM           | galactose mutarotase (aldose 1-epimerase)              | Multiple_Complex |
| TC0300009122.hg.1 | 4.61  | 6     | -2.63 | 0.0001 | 0.0085 | CPA3           | carboxypeptidase A3 (mast cell)                        | Multiple_Complex |
| TC0100014910.hg.1 | 10.59 | 9.41  | 2.26  | 0.0001 | 0.0086 | TGFBR3         | transforming growth factor beta receptor III           | Multiple_Complex |
| TC2200007419.hg.1 | 11.06 | 11.8  | -1.66 | 0.0001 | 0.0086 | TNRC6B         | trinucleotide repeat containing 6B                     | Multiple_Complex |
| TC1300008463.hg.1 | 3.92  | 4.61  | -1.61 | 0.0001 | 0.0087 | FLT1           | fms-related tyrosine kinase 1                          | Multiple_Complex |
| TC0600007273.hg.1 | 12.73 | 11.5  | 2.34  | 0.0001 | 0.0088 | HIST1H1E       | histone cluster 1, H1e                                 | Coding           |
| TC0300013998.hg.1 | 8.68  | 8.08  | 1.51  | 0.0001 | 0.0088 | SFMBT1         | Scm-like with four mbt domains 1                       | Multiple_Complex |
| TC1100011029.hg.1 | 4.34  | 5.18  | -1.79 | 0.0001 | 0.0088 | VWCE           | von Willebrand factor C and EGF domains                | Multiple_Complex |
| TC0100015819.hg.1 | 16.04 | 15.17 | 1.83  | 0.0002 | 0.0088 | S100A10        | S100 calcium binding protein A10                       | Multiple_Complex |
| TC0500011263.hg.1 | 5.58  | 6.25  | -1.59 | 0.0002 | 0.0088 | SERINC5        | Memczak2013 ALT_ACCEPTOR, ALT_DONOR, coding, NonCoding | Multiple_Complex |
| TC1900011255.hg.1 | 10.44 | 12.19 | -3.35 | 0.0002 | 0.009  | SIGLEC10       | sialic acid binding Ig-like lectin 10                  | Multiple_Complex |
| TC0100017075.hg.1 | 9.46  | 9.02  | 1.36  | 0.0002 | 0.009  | NUCKS1         | nuclear casein kinase and cyclin-dependent kinase su   | Multiple_Complex |
| TC2000007089.hg.1 | 5.46  | 4.5   | 1.94  | 0.0002 | 0.009  | TPX2           | TPX2, microtubule-associated                           | Multiple_Complex |
| TC2000009956.hg.1 | 9.38  | 9.95  | -1.49 | 0.0002 | 0.0091 | PCMTD2         | protein-L-isoaspartate (D-aspartate) O-methyltransfe   | Multiple_Complex |
| TC1700009974.hg.1 | 5.92  | 5.34  | 1.5   | 0.0002 | 0.0091 | SHMT1; MIR6778 | serine hydroxymethyltransferase 1 (soluble); microRI   | Multiple_Complex |
| TC0600011525.hg.1 | 10.5  | 11.04 | -1.45 | 0.0002 | 0.0093 | RXRB           | retinoid X receptor beta                               | Multiple_Complex |
| TC0100007333.hg.1 | 11.85 | 13.59 | -3.33 | 0.0002 | 0.0094 | PITHD1         | PITH (C-terminal proteasome-interacting domain of t    | Multiple_Complex |
| TC0300007296.hg.1 | 8.97  | 8.01  | 1.94  | 0.0002 | 0.0094 | SCAP           | Memczak2013 ANTISENSE, CDS, coding, INTERNAL be        | NonCoding        |
| TC1900011982.hg.1 | 5.62  | 5.13  | 1.41  | 0.0002 | 0.0094 | OPA3           | optic atrophy 3 (autosomal recessive, with chorea an   | Coding           |
| TC1100012471.hg.1 | 13.04 | 14.09 | -2.08 | 0.0002 | 0.0094 | AMICA1         | adhesion molecule, interacts with CXADR antigen 1      | Multiple_Complex |
| TC1700006808.hg.1 | 6.11  | 5.57  | 1.46  | 0.0002 | 0.0094 | RANGRF         | RAN guanine nucleotide release factor                  | Multiple_Complex |
| TC0500013296.hg.1 | 6.37  | 6.83  | -1.37 | 0.0002 | 0.0094 | C1QTNF3-AMACF  | C1QTNF3-AMACR readthrough (NMD candidate)              | Multiple_Complex |
| TC0100011512.hg.1 | 6.56  | 5.82  | 1.67  | 0.0002 | 0.0094 | DTL            | denticleless E3 ubiquitin protein ligase homolog (Dro  | Multiple_Complex |
| TC1100013209.hg.1 | 9.72  | 10.67 | -1.93 | 0.0002 | 0.0094 | PAK1           | p21 protein (Cdc42/Rac)-activated kinase 1             | Multiple_Complex |
| TC0200012091.hg.1 | 5.34  | 4.41  | 1.91  | 0.0002 | 0.0094 | ZNF512         | Memczak2013 ANTISENSE, coding, INTERNAL, UTR3 t        | NonCoding        |
| TC0100015509.hg.1 | 6.51  | 5.37  | 2.2   | 0.0002 | 0.0094 | FAM72B         | family with sequence similarity 72, member B           | Multiple_Complex |
| TC0800011285.hg.1 | 10.21 | 9.6   | 1.52  | 0.0002 | 0.0096 | ZNF706         | zinc finger protein 706                                | Multiple_Complex |
| TC0100012935.hg.1 | 4.11  | 4.67  | -1.47 | 0.0002 | 0.0097 | PRAMEF10       | PRAME family member 10                                 | Coding           |
| TC1400007558.hg.1 | 9.61  | 10.43 | -1.76 | 0.0002 | 0.0098 | SUSD6          | sushi domain containing 6                              | Multiple_Complex |
| TC0X00008718.hg.1 | 9.43  | 10.2  | -1.7  | 0.0002 | 0.0098 | MTMR1          | myotubularin related protein 1                         | Multiple_Complex |
| TC0700013327.hg.1 | 8.52  | 7.9   | 1.54  | 0.0002 | 0.0099 | CHST12         | carbohydrate (chondroitin 4) sulfotransferase 12       | Coding           |
| TC2100007032.hg.1 | 7.3   | 6.48  | 1.76  | 0.0002 | 0.01   | CBR1           | carbonyl reductase 1                                   | Multiple_Complex |
| TC1900007291.hg.1 | 6.11  | 5.26  | 1.8   | 0.0002 | 0.0101 | TMEM38A        | Transcript Identified by AceView, Entrez Gene ID(s) 7  | Unassigned       |
| TC0800007057.hg.1 | 14.13 | 15.54 | -2.65 | 0.0002 | 0.0101 | DOCK5          | dedicator of cytokinesis 5                             | Multiple_Complex |
| TC1200008488.hg.1 | 13.7  | 14.85 | -2.23 | 0.0002 | 0.0102 | PLXNC1         | plexin C1                                              | Multiple_Complex |
| TC0200015764.hg.1 | 10.48 | 11.79 | -2.47 | 0.0002 | 0.0102 | CNPPD1         | cyclin Pas1/PHO80 domain containing 1                  | Multiple_Complex |
| TC0100015891.hg.1 | 10.71 | 12.11 | -2.65 | 0.0002 | 0.0102 | CRTC2          | CREB regulated transcription coactivator 2             | Multiple_Complex |
| TC1900009765.hg.1 | 6.95  | 7.53  | -1.5  | 0.0002 | 0.0102 | LYL1           | lymphoblastic leukemia associated hematopoiesis re     | Multiple_Complex |
| TC0100012760.hg.1 | 8.81  | 9.36  | -1.47 | 0.0002 | 0.0102 | RERE           | arginine-glutamic acid dipeptide (RE) repeats          | Multiple_Complex |
| TC1900010286.hg.1 | 7.17  | 6.65  | 1.43  | 0.0002 | 0.0102 | UQCRF51        | ubiquinol-cytochrome c reductase, Rieske iron-sulfur   | Coding           |
| TC0X00008108.hg.1 | 9.36  | 10.38 | -2.01 | 0.0002 | 0.0102 | TMEM164        | transmembrane protein 164                              | Multiple_Complex |
| TC2000008237.hg.1 | 11.99 | 10.04 | 3.86  | 0.0002 | 0.0103 | MAVS           | Jeck2013 ANTISENSE, coding, INTERNAL, OVEXON, U        | NonCoding        |
| TC0600007544.hg.1 | 12.72 | 12.08 | 1.56  | 0.0002 | 0.0104 | TUBB           | tubulin, beta class I                                  | Multiple_Complex |
| TC0800012284.hg.1 | 6.57  | 7.28  | -1.63 | 0.0002 | 0.0107 | EXTL3          | exostosin-like glycosyltransferase 3                   | Multiple_Complex |
| TC1200009846.hg.1 | 8.84  | 7.72  | 2.17  | 0.0002 | 0.0108 | LINC00612      | long intergenic non-protein coding RNA 612             | Multiple_Complex |
| TC0100018080.hg.1 | 10.13 | 11.08 | -1.93 | 0.0002 | 0.0108 | AHCTF1         | AT hook containing transcription factor 1              | Multiple_Complex |
| TC0100015894.hg.1 | 10.53 | 10.04 | 1.4   | 0.0002 | 0.0108 | JTB            | jumping translocation breakpoint                       | Multiple_Complex |
| TC2200009259.hg.1 | 7.21  | 6.62  | 1.51  | 0.0002 | 0.0108 | SMTN           | smoothelin                                             | Multiple_Complex |
| TC0100009029.hg.1 | 9.82  | 8.91  | 1.88  | 0.0002 | 0.0108 | BRDT           | bromodomain, testis-specific                           | Multiple_Complex |
| TC0700012812.hg.1 | 15.06 | 17.04 | -3.94 | 0.0002 | 0.0108 | MKRN1          | makorin ring finger protein 1                          | Multiple_Complex |
| TC1000009221.hg.1 | 9.61  | 10.52 | -1.88 | 0.0002 | 0.0108 | ZRANB1         | zinc finger, RAN-binding domain containing 1           | Multiple_Complex |
| TC0500011478.hg.1 | 8.04  | 9.23  | -2.28 | 0.0002 | 0.0108 | KIAA0825       | KIAA0825                                               | Multiple_Complex |
| TC1500010856.hg.1 | 7.71  | 10.2  | -5.62 | 0.0002 | 0.0108 | EPB42          | erythrocyte membrane protein band 4.2                  | NonCoding        |
| TC1400008036.hg.1 | 5.04  | 5.54  | -1.42 | 0.0002 | 0.0109 | COX8C          | cytochrome c oxidase subunit VIIIc                     | Coding           |
| TC0600011697.hg.1 | 5.88  | 5.28  | 1.52  | 0.0002 | 0.0109 | CCDC167        | coiled-coil domain containing 167                      | Coding           |
| TC1000008401.hg.1 | 9.91  | 8.29  | 3.07  | 0.0002 | 0.0109 | IFIT5          | interferon-induced protein with tetratricopeptide re   | Coding           |
| TC0200014772.hg.1 | 11.7  | 10.12 | 2.98  | 0.0002 | 0.0109 | IFIH1          | interferon induced, with helicase C domain 1           | Multiple_Complex |
| TC0500012942.hg.1 | 7.86  | 8.84  | -1.98 | 0.0002 | 0.011  | RNF44          | ring finger protein 44                                 | Multiple_Complex |
| TC1800006650.hg.1 | 13.08 | 14.36 | -2.43 | 0.0002 | 0.011  | RAB31          | RAB31, member RAS oncogene family                      | Multiple_Complex |
| TC0400011932.hg.1 | 10.52 | 11.25 | -1.65 | 0.0002 | 0.0112 | ELF2           | E74-like factor 2 (ets domain transcription factor)    | Multiple_Complex |
| TC1600007959.hg.1 | 7.32  | 5.7   | 3.07  | 0.0002 | 0.0114 | MT1E           | metallothionein 1E                                     | Multiple_Complex |
| TC1100012473.hg.1 | 8.28  | 8.94  | -1.58 | 0.0002 | 0.0114 | MPZL3          | myelin protein zero-like 3                             | Multiple_Complex |
| TC0900010958.hg.1 | 8.5   | 9.16  | -1.58 | 0.0002 | 0.0114 | TRMO           | tRNA methyltransferase O                               | Multiple_Complex |
| TSUnmapped000003: | 10.84 | 10.1  | 1.67  | 0.0002 | 0.0114 | RCC2           | regulator of chromosome condensation 2                 | Coding           |
| TC1000008092.hg.1 | 11.19 | 10.64 | 1.47  | 0.0002 | 0.0115 | VDAC2          | voltage-dependent anion channel 2                      | Multiple_Complex |
| TC1700006480.hg.1 | 7.87  | 7.3   | 1.49  | 0.0002 | 0.0115 | TIMM22         | translocase of inner mitochondrial membrane 22 hor     | Multiple_Complex |
| TC0300008782.hg.1 | 6.23  | 6.96  | -1.65 | 0.0002 | 0.0115 | IFT122         | intraflagellar transport 122                           | Multiple_Complex |
| TC1100010207.hg.1 | 6.44  | 7.64  | -2.29 | 0.0002 | 0.0116 | SOX6; MIR6073  | SRY box 6; microRNA 6073                               | Multiple_Complex |
| TC0100010855.hg.1 | 10.17 | 11.23 | -2.09 | 0.0002 | 0.0118 | NPL            | N-acetylneuraminatase pyruvate lyase (dihydrodipicol   | Multiple_Complex |
| TC0500007792.hg.1 | 11.33 | 10.63 | 1.62  | 0.0002 | 0.0119 | HEXB           | hexosaminidase B (beta polypeptide)                    | Multiple_Complex |

|                   |       |       |       |        |        |                |                                                          |                  |
|-------------------|-------|-------|-------|--------|--------|----------------|----------------------------------------------------------|------------------|
| TC1600010665.hg.1 | 8.08  | 8.73  | -1.57 | 0.0002 | 0.0119 | DPEP2          | dipeptidase 2                                            | Multiple_Complex |
| TC0100010625.hg.1 | 6.9   | 6.19  | 1.64  | 0.0002 | 0.0119 | FASLG          | Fas ligand (TNF superfamily, member 6)                   | Coding           |
| TC0700009082.hg.1 | 4.87  | 4.44  | 1.35  | 0.0002 | 0.0121 | SMO            | smoothened, frizzled class receptor                      | Multiple_Complex |
| TC0100008955.hg.1 | 12.21 | 13.05 | -1.78 | 0.0002 | 0.0121 | PKN2           | protein kinase N2                                        | Multiple_Complex |
| TC0100015364.hg.1 | 7.91  | 9.1   | -2.28 | 0.0002 | 0.0122 | TSPAN2         | tetraspanin 2                                            | Multiple_Complex |
| TC0700009232.hg.1 | 10.06 | 12.25 | -4.57 | 0.0002 | 0.0122 | BPGM           | 2,3-bisphosphoglycerate mutase                           | Coding           |
| TC0800010524.hg.1 | 9.06  | 8.41  | 1.57  | 0.0002 | 0.0122 | IMPAD1         | inositol monophosphatase domain containing 1             | Multiple_Complex |
| TC0100016044.hg.1 | 5.87  | 6.75  | -1.84 | 0.0002 | 0.0123 | FCRL5          | Fc receptor-like 5                                       | Multiple_Complex |
| TC0200016469.hg.1 | 8.34  | 7.74  | 1.52  | 0.0002 | 0.0123 | ANXA4          | annexin A4                                               | Multiple_Complex |
| TC1600007931.hg.1 | 14.99 | 15.99 | -2    | 0.0003 | 0.0124 | LPCAT2         | lysophosphatidylcholine acyltransferase 2                | Multiple_Complex |
| TC0100010514.hg.1 | 7.82  | 9.43  | -3.04 | 0.0003 | 0.0124 | MPZL1          | myelin protein zero-like 1                               | Multiple_Complex |
| TC0X00010670.hg.1 | 5.93  | 4.81  | 2.17  | 0.0003 | 0.0125 | TMEM255A       | transmembrane protein 255A                               | Multiple_Complex |
| TC1600009066.hg.1 | 8.61  | 9.68  | -2.1  | 0.0003 | 0.0126 | HAGH           | hydroxyacylglutathione hydrolase                         | Multiple_Complex |
| TC2200007069.hg.1 | 7.43  | 9.76  | -5.03 | 0.0003 | 0.0127 | OSBP2          | oxysterol binding protein 2                              | Multiple_Complex |
| TC1100012957.hg.1 | 12.75 | 11.01 | 3.34  | 0.0003 | 0.0127 | TRIM22         | tripartite motif containing 22                           | Multiple_Complex |
| TC1700007865.hg.1 | 6.29  | 5.66  | 1.55  | 0.0003 | 0.0127 | CNP            | 2,3-cyclic nucleotide 3 phosphodiesterase                | Multiple_Complex |
| TC1000008399.hg.1 | 5.68  | 7.09  | -2.66 | 0.0003 | 0.0128 | IFIT1B         | interferon-induced protein with tetratricopeptide repeat | Coding           |
| TC0500006744.hg.1 | 7.45  | 8.51  | -2.09 | 0.0003 | 0.0128 | ROPN1L         | rhopilin associated tail protein 1-like                  | Multiple_Complex |
| TC0200014004.hg.1 | 9.89  | 10.35 | -1.37 | 0.0003 | 0.0129 | CCDC93         | coiled-coil domain containing 93                         | Multiple_Complex |
| TC1500010747.hg.1 | 9.66  | 10.49 | -1.78 | 0.0003 | 0.0129 | RNF111         | ring finger protein 111                                  | Multiple_Complex |
| TC0X00011378.hg.1 | 3.48  | 3.93  | -1.36 | 0.0003 | 0.013  | RAB40A         | RAB40A, member RAS oncogene family                       | Coding           |
| TC0100012778.hg.1 | 14.04 | 13.13 | 1.87  | 0.0003 | 0.013  | ENO1           | enolase 1, (alpha)                                       | Multiple_Complex |
| TC0400012795.hg.1 | 11.57 | 12.4  | -1.77 | 0.0003 | 0.013  | FIP1L1         | factor interacting with PAPOLA and CPSF1                 | Multiple_Complex |
| TC1800009206.hg.1 | 10.21 | 9.51  | 1.63  | 0.0003 | 0.0131 | TXNL4A         | thioredoxin-like 4A                                      | Multiple_Complex |
| TC2100007964.hg.1 | 7.97  | 8.73  | -1.69 | 0.0003 | 0.0132 | SYNJ1          | synaptojanin 1                                           | Multiple_Complex |
| TC0900011918.hg.1 | 13.73 | 12.94 | 1.72  | 0.0003 | 0.0132 | FCN1           | ficolin (collagen/fibrinogen domain containing) 1        | Coding           |
| TC2200007312.hg.1 | 9.69  | 8.64  | 2.07  | 0.0003 | 0.0132 | LGALS1         | lectin, galactoside-binding, soluble, 1                  | Multiple_Complex |
| TC2000008915.hg.1 | 7.08  | 6.49  | 1.51  | 0.0003 | 0.0133 | AHCY           | adenosylhomocysteinase                                   | Multiple_Complex |
| TC0500013269.hg.1 | 4.69  | 5.3   | -1.53 | 0.0003 | 0.0133 | FAM153B        | family with sequence similarity 153, member B            | NonCoding        |
| TC0200015425.hg.1 | 9.47  | 10.61 | -2.2  | 0.0003 | 0.0133 | TRAK2          | trafficking protein, kinesin binding 2                   | Multiple_Complex |
| TC0700008857.hg.1 | 10.14 | 9.36  | 1.72  | 0.0003 | 0.0133 | MDFIC          | MyoD family inhibitor domain containing                  | Multiple_Complex |
| TC1200006700.hg.1 | 9.48  | 10.42 | -1.92 | 0.0003 | 0.0133 | FOXJ2          | forkhead box J2                                          | Multiple_Complex |
| TC1100011035.hg.1 | 9.52  | 10.21 | -1.61 | 0.0003 | 0.0134 | CPSF7          | cleavage and polyadenylation specific factor 7           | Multiple_Complex |
| TC0200016680.hg.1 | 5.73  | 6.23  | -1.42 | 0.0003 | 0.0134 | SERTAD2        | SERTA domain containing 2                                | NonCoding        |
| TC1000011798.hg.1 | 10.5  | 9.72  | 1.72  | 0.0003 | 0.0136 | XPNPEP1        | X-prolyl aminopeptidase (aminopeptidase P) 1, soluble    | Multiple_Complex |
| TC0200015012.hg.1 | 8.37  | 7.76  | 1.52  | 0.0003 | 0.0136 | ATP5G3         | ATP synthase, H+ transporting, mitochondrial Fo complex  | Multiple_Complex |
| TC0200011188.hg.1 | 6.13  | 5.5   | 1.54  | 0.0003 | 0.0136 | AGAP1          | ArfGAP with GTPase domain, ankyrin repeat and PH domain  | Multiple_Complex |
| TC1400009481.hg.1 | 6.54  | 7.91  | -2.58 | 0.0003 | 0.0136 | PLEK2          | pleckstrin 2                                             | Multiple_Complex |
| TC1200006604.hg.1 | 8.56  | 9.7   | -2.2  | 0.0003 | 0.0136 | CD9            | CD9 molecule                                             | Multiple_Complex |
| TC1900011997.hg.1 | 4.78  | 4.33  | 1.37  | 0.0003 | 0.0137 | CGB7           | chorionic gonadotropin, beta polypeptide 7               | Multiple_Complex |
| TSUnmapped000001  | 4.39  | 4.91  | -1.43 | 0.0003 | 0.0137 | LRP6           | LDL receptor related protein 6                           | Coding           |
| TC1100009837.hg.1 | 4.6   | 5.3   | -1.63 | 0.0003 | 0.0137 | MIRGPRE        | MAS-related GPR, member E                                | Coding           |
| TC0400012826.hg.1 | 10.95 | 11.6  | -1.57 | 0.0003 | 0.0137 | HERC3          | HECT and RLD domain containing E3 ubiquitin protein      | Multiple_Complex |
| TC1500008982.hg.1 | 7.37  | 8.22  | -1.8  | 0.0003 | 0.0137 | KATNB1         | katanin p80 subunit B-like 1                             | Multiple_Complex |
| TC0300006791.hg.1 | 12.18 | 12.91 | -1.66 | 0.0003 | 0.0137 | KAT2B          | K(lysine) acetyltransferase 2B                           | Multiple_Complex |
| TC1900007386.hg.1 | 5.32  | 4.91  | 1.34  | 0.0003 | 0.0137 | SSBP4          | single stranded DNA binding protein 4                    | Multiple_Complex |
| TC0900010177.hg.1 | 6.81  | 7.67  | -1.82 | 0.0003 | 0.0137 | CNTNAP3B       | Salzman2013 ANNOTATED, CDS, coding, INTERNAL, CDS        | NonCoding        |
| TC0X00007325.hg.1 | 7.21  | 6.43  | 1.72  | 0.0003 | 0.0137 | RIBC1          | RIB43A domain with coiled-coils 1                        | Multiple_Complex |
| TC2000006501.hg.1 | 11.03 | 12.35 | -2.49 | 0.0003 | 0.0137 | SIRPA          | signal-regulatory protein alpha                          | Coding           |
| TC0500008342.hg.1 | 9.55  | 10.29 | -1.67 | 0.0003 | 0.0138 | DCP2           | decapping mRNA 2                                         | Multiple_Complex |
| TC0700008565.hg.1 | 7.27  | 8.16  | -1.85 | 0.0003 | 0.014  | SLC12A9        | solute carrier family 12, member 9                       | Multiple_Complex |
| TC1700010707.hg.1 | 8.56  | 7.32  | 2.35  | 0.0003 | 0.0143 | DHX58          | DEXH (Asp-Glu-X-His) box polypeptide 58                  | Multiple_Complex |
| TC2000008650.hg.1 | 5.63  | 6.15  | -1.44 | 0.0003 | 0.0144 | THBD           | thrombomodulin                                           | Coding           |
| TC1600011428.hg.1 | 10.52 | 9.9   | 1.54  | 0.0003 | 0.0144 | TERF2IP        | telomeric repeat binding factor 2, interacting protein   | Coding           |
| TC0900009267.hg.1 | 7.24  | 6.75  | 1.4   | 0.0003 | 0.0147 | SSNA1          | Sjogren syndrome nuclear autoantigen 1                   | Multiple_Complex |
| TC1400010721.hg.1 | 7.87  | 7.16  | 1.64  | 0.0003 | 0.0152 | PSME2; MIR7703 | proteasome activator subunit 2; microRNA 7703            | Multiple_Complex |
| TC1600008005.hg.1 | 10.26 | 8.78  | 2.8   | 0.0003 | 0.0153 | ADGRG1         | adhesion G protein-coupled receptor G1                   | Multiple_Complex |
| TC0300008705.hg.1 | 8.98  | 10.15 | -2.24 | 0.0003 | 0.0154 | ABTB1          | ankyrin repeat and BTB (POZ) domain containing 1         | Multiple_Complex |
| TC0900008207.hg.1 | 7.13  | 6.73  | 1.32  | 0.0004 | 0.0155 | SEC61B         | Sec61 translocon beta subunit                            | Multiple_Complex |
| TC0400009217.hg.1 | 8.41  | 9.67  | -2.39 | 0.0004 | 0.0155 | KLHL2          | kelch-like family member 2                               | Multiple_Complex |
| TC0800007738.hg.1 | 13.39 | 14.41 | -2.02 | 0.0004 | 0.0156 | SDCBP          | syndecan binding protein                                 | Multiple_Complex |
| TC0300013795.hg.1 | 8.44  | 9.17  | -1.66 | 0.0004 | 0.0156 | OXNAD1         | oxidoreductase NAD-binding domain containing 1           | Multiple_Complex |
| TC1400008763.hg.1 | 8.82  | 7.41  | 2.66  | 0.0004 | 0.0157 | GZMH           | granzyme H                                               | Coding           |
| TC1300008179.hg.1 | 9.57  | 8.79  | 1.71  | 0.0004 | 0.0159 | UPF3A          | UPF3 regulator of nonsense transcripts homolog A (yeast) | Multiple_Complex |
| TC0500008229.hg.1 | 6.9   | 6.24  | 1.58  | 0.0004 | 0.016  | PAM            | peptidylglycine alpha-amidating monooxygenase            | Multiple_Complex |
| TC1400009701.hg.1 | 10.14 | 10.93 | -1.74 | 0.0004 | 0.0162 | AREL1          | apoptosis resistant E3 ubiquitin protein ligase 1        | Multiple_Complex |
| TC0100010252.hg.1 | 6.09  | 7.62  | -2.9  | 0.0004 | 0.0162 | FCER1A         | Fc fragment of IgE, high affinity I, receptor for; alpha | Coding           |
| TC1600006561.hg.1 | 8.27  | 8.88  | -1.52 | 0.0004 | 0.0162 | MAPK8IP3       | mitogen-activated protein kinase 8 interacting protein 3 | Multiple_Complex |
| TC0600007374.hg.1 | 10.58 | 9.68  | 1.87  | 0.0004 | 0.0162 | HIST1H2AI      | histone cluster 1, H2ai                                  | Coding           |
| TC1900007025.hg.1 | 8.88  | 10.14 | -2.4  | 0.0004 | 0.0164 | PLPPR2         | phospholipid phosphatase related 2                       | Multiple_Complex |
| TC1600008454.hg.1 | 8.23  | 9.06  | -1.78 | 0.0004 | 0.0165 | GABARAPL2      | GABA(A) receptor-associated protein like 2               | Multiple_Complex |
| TC1400009973.hg.1 | 8.07  | 9.51  | -2.71 | 0.0004 | 0.0165 | RPS6KA5        | ribosomal protein S6 kinase, 90kDa, polypeptide 5        | Multiple_Complex |



|                   |       |       |       |        |        |               |                                                          |                  |
|-------------------|-------|-------|-------|--------|--------|---------------|----------------------------------------------------------|------------------|
| TC1400007975.hg.1 | 5.71  | 6.69  | -1.97 | 0.0004 | 0.0165 | C14orf159     | chromosome 14 open reading frame 159                     | Multiple_Complex |
| TC1100007884.hg.1 | 9.92  | 9.36  | 1.47  | 0.0004 | 0.0165 | SLC3A2        | solute carrier family 3 (amino acid transporter heavy    | Multiple_Complex |
| TC0800011611.hg.1 | 3.58  | 4.09  | -1.42 | 0.0004 | 0.0165 | TNFRSF11B     | tumor necrosis factor receptor superfamily, member       | Multiple_Complex |
| TC0X00009213.hg.1 | 5.43  | 4.85  | 1.5   | 0.0004 | 0.0165 | MAP7D2        | MAP7 domain containing 2                                 | Multiple_Complex |
| TC0200010416.hg.1 | 6.38  | 4.86  | 2.87  | 0.0004 | 0.0165 | SPATS2L       | Transcript Identified by AceView, Entrez Gene ID(s) 2    | Unassigned       |
| TC0300009458.hg.1 | 8.29  | 9.12  | -1.78 | 0.0004 | 0.0165 | SEC62         | SEC62 homolog, preprotein translocation factor           | Multiple_Complex |
| TC0200016643.hg.1 | 7.72  | 8.51  | -1.73 | 0.0004 | 0.0165 | DNMT3A        | DNA (cytosine-5-)-methyltransferase 3 alpha              | Multiple_Complex |
| TC1200012679.hg.1 | 5.99  | 6.85  | -1.81 | 0.0004 | 0.0165 | ACSS3         | acyl-CoA synthetase short-chain family member 3          | NonCoding        |
| TC1700008135.hg.1 | 7.33  | 6.87  | 1.38  | 0.0004 | 0.0165 | TBX21         | T-box 21                                                 | Multiple_Complex |
| TC0X00006623.hg.1 | 9.18  | 8.62  | 1.48  | 0.0004 | 0.0166 | PRPS2         | phosphoribosyl pyrophosphate synthetase 2                | Multiple_Complex |
| TC0900011655.hg.1 | 9.86  | 11.25 | -2.63 | 0.0004 | 0.0168 | ZER1          | zyg-11 related, cell cycle regulator                     | Multiple_Complex |
| TC2000007277.hg.1 | 12.63 | 11.98 | 1.57  | 0.0004 | 0.0168 | RPN2          | ribophorin II                                            | Multiple_Complex |
| TC1100010897.hg.1 | 14.72 | 12.65 | 4.2   | 0.0004 | 0.0168 | UBE2L6        | ubiquitin-conjugating enzyme E2L 6                       | Multiple_Complex |
| TC1700007097.hg.1 | 7.91  | 8.76  | -1.81 | 0.0004 | 0.0168 | GID4          | GID complex subunit 4 homolog                            | Multiple_Complex |
| TC1600010889.hg.1 | 11.8  | 11.22 | 1.49  | 0.0004 | 0.0168 | KARS          | lysyl-tRNA synthetase                                    | Multiple_Complex |
| TC0200012608.hg.1 | 9.53  | 10.15 | -1.53 | 0.0004 | 0.0168 | PSME4         | proteasome activator subunit 4                           | Multiple_Complex |
| TC1800007392.hg.1 | 3.26  | 3.51  | -1.19 | 0.0004 | 0.0168 | BOD1L2        | biorientation of chromosomes in cell division 1-like 2   | Coding           |
| TC0600009362.hg.1 | 4.25  | 3.74  | 1.42  | 0.0004 | 0.0168 | HEY2          | hes-related family bHLH transcription factor with YRF    | Multiple_Complex |
| TC0700012512.hg.1 | 7.94  | 8.97  | -2.04 | 0.0004 | 0.0168 | LRRC4         | leucine rich repeat containing 4                         | Coding           |
| TC0500012498.hg.1 | 10.61 | 9.72  | 1.86  | 0.0004 | 0.0168 | ANXA6         | annexin A6                                               | Multiple_Complex |
| TC1200007654.hg.1 | 6.71  | 6.27  | 1.35  | 0.0004 | 0.0168 | ATG101        | autophagy related 101                                    | Multiple_Complex |
| TC0300007474.hg.1 | 9.29  | 9.82  | -1.45 | 0.0004 | 0.0168 | DNAH1         | dynein, axonemal, heavy chain 1                          | Multiple_Complex |
| TSUnmapped0000074 | 6.26  | 6.92  | -1.58 | 0.0004 | 0.0169 | RPS6KA1       | ribosomal protein S6 kinase, 90kDa, polypeptide 1        | NonCoding        |
| TC0300013606.hg.1 | 3.75  | 3.29  | 1.38  | 0.0004 | 0.0169 | TMEM44        | transmembrane protein 44                                 | Multiple_Complex |
| TC1000008716.hg.1 | 9.44  | 9.84  | -1.31 | 0.0004 | 0.0169 | GBF1          | golgi brefeldin A resistant guanine nucleotide exchan    | Multiple_Complex |
| TC1900011940.hg.1 | 15.78 | 14.81 | 1.96  | 0.0004 | 0.0169 | ECH1          | enoyl-CoA hydratase 1, peroxisomal                       | Multiple_Complex |
| TC0400010418.hg.1 | 10.04 | 10.89 | -1.8  | 0.0004 | 0.017  | RELL1         | RELT-like 1                                              | Multiple_Complex |
| TC0800012470.hg.1 | 13.6  | 14.67 | -2.1  | 0.0004 | 0.017  | TMEM71        | transmembrane protein 71                                 | Multiple_Complex |
| TC1500010776.hg.1 | 10.25 | 9.83  | 1.34  | 0.0004 | 0.017  | IDH3A         | isocitrate dehydrogenase 3 (NAD+) alpha                  | Multiple_Complex |
| TC1700010230.hg.1 | 8.22  | 7.61  | 1.52  | 0.0004 | 0.017  | TIAF1; MYO18A | TGFB1-induced anti-apoptotic factor 1; myosin XVIII      | Multiple_Complex |
| TC2000009975.hg.1 | 12.72 | 12.1  | 1.53  | 0.0004 | 0.0171 | TMEM230       | transmembrane protein 230                                | Multiple_Complex |
| TC1200009768.hg.1 | 9.47  | 10.28 | -1.76 | 0.0004 | 0.0171 | LPCAT3        | lysophosphatidylcholine acyltransferase 3                | Multiple_Complex |
| TC2000009957.hg.1 | 8.68  | 9.45  | -1.71 | 0.0004 | 0.0172 | LINC00266-1   | long intergenic non-protein coding RNA 266-1             | Multiple_Complex |
| TC1100012019.hg.1 | 8.68  | 9.77  | -2.14 | 0.0004 | 0.0173 | SESN3         | sestrin 3                                                | Multiple_Complex |
| TSUnmapped0000068 | 6.51  | 6.95  | -1.35 | 0.0004 | 0.0174 | MLXIP         | MLX interacting protein                                  | NonCoding        |
| TC2000008653.hg.1 | 6.77  | 7.95  | -2.25 | 0.0004 | 0.0174 | CD93          | CD93 molecule                                            | Multiple_Complex |
| TC0800007040.hg.1 | 7.98  | 8.75  | -1.7  | 0.0004 | 0.0174 | ADAM28        | ADAM metallopeptidase domain 28                          | Multiple_Complex |
| TC0100012734.hg.1 | 7.41  | 8.81  | -2.64 | 0.0004 | 0.0174 | TNFRSF9       | tumor necrosis factor receptor superfamily, member       | Coding           |
| TC1900010538.hg.1 | 6.7   | 6.15  | 1.46  | 0.0004 | 0.0177 | ZNF790        | zinc finger protein 790                                  | Coding           |
| TC0300007257.hg.1 | 8.81  | 7.95  | 1.81  | 0.0004 | 0.0177 | CCR5          | chemokine (C-C motif) receptor 5 (gene/pseudogene        | Multiple_Complex |
| TC0800008314.hg.1 | 13.23 | 12.69 | 1.46  | 0.0004 | 0.0177 | MTDH          | metadherin                                               | Multiple_Complex |
| TC1100007394.hg.1 | 9.12  | 9.76  | -1.55 | 0.0004 | 0.0177 | CD82          | CD82 molecule                                            | Multiple_Complex |
| TC0100009475.hg.1 | 7.86  | 7.23  | 1.55  | 0.0004 | 0.0177 | MAGI3         | Jeck2013 ALT_ACCEPTOR, ALT_DONOR, coding, INTE           | Multiple_Complex |
| TC1800007518.hg.1 | 11.21 | 9.64  | 2.98  | 0.0004 | 0.0177 | ZCCHC2        | zinc finger, CCHC domain containing 2                    | Multiple_Complex |
| TC0100017519.hg.1 | 9.07  | 8.61  | 1.38  | 0.0005 | 0.0178 | ACBD3         | acyl-CoA binding domain containing 3                     | Multiple_Complex |
| TC0500013155.hg.1 | 11.32 | 12.72 | -2.64 | 0.0005 | 0.0178 | BASP1         | brain abundant, membrane attached signal protein 1       | Coding           |
| TC1900009633.hg.1 | 8.46  | 7.73  | 1.67  | 0.0005 | 0.0178 | S1PR5         | sphingosine-1-phosphate receptor 5                       | Coding           |
| TC1900007181.hg.1 | 10.45 | 9.63  | 1.76  | 0.0005 | 0.0178 | TECR; MIR639  | trans-2,3-enoyl-CoA reductase; microRNA 639              | Multiple_Complex |
| TC0400007344.hg.1 | 4.57  | 4.04  | 1.44  | 0.0005 | 0.0178 | UCHL1         | ubiquitin C-terminal hydrolase L1                        | Multiple_Complex |
| TC0600014206.hg.1 | 7     | 6.54  | 1.37  | 0.0005 | 0.0178 | TCP10L2       | t-complex 10-like 2                                      | Multiple_Complex |
| TC1400008355.hg.1 | 8.08  | 8.88  | -1.73 | 0.0005 | 0.0178 | RCOR1         | REST corepressor 1                                       | Multiple_Complex |
| TC1100009171.hg.1 | 6.15  | 6.84  | -1.61 | 0.0005 | 0.0178 | RNF214        | ring finger protein 214                                  | Multiple_Complex |
| TC2200009248.hg.1 | 7.31  | 8.54  | -2.35 | 0.0005 | 0.018  | KREMEN1       | kringle containing transmembrane protein 1               | Multiple_Complex |
| TC0100015196.hg.1 | 9.91  | 9.14  | 1.7   | 0.0005 | 0.018  | PSMA5         | proteasome subunit alpha 5                               | Multiple_Complex |
| TC0300008849.hg.1 | 7.84  | 7.36  | 1.39  | 0.0005 | 0.0181 | UBA5          | ubiquitin-like modifier activating enzyme 5              | Multiple_Complex |
| TC0300007161.hg.1 | 8.16  | 8.62  | -1.38 | 0.0005 | 0.0183 | VIPR1         | vasoactive intestinal peptide receptor 1                 | Multiple_Complex |
| TC1900008013.hg.1 | 9.46  | 8.81  | 1.57  | 0.0005 | 0.0183 | PSMD8         | proteasome 26S subunit, non-ATPase 8                     | Multiple_Complex |
| TC1000008908.hg.1 | 11.02 | 11.66 | -1.57 | 0.0005 | 0.0183 | SHOC2         | SHOC2 leucine-rich repeat scaffold protein               | Multiple_Complex |
| TSUnmapped0000035 | 8.18  | 7.64  | 1.45  | 0.0005 | 0.0183 | SLC2A6        | solute carrier family 2 (facilitated glucose transporter | Coding           |
| TC1500010857.hg.1 | 8.32  | 11.15 | -7.13 | 0.0005 | 0.0183 | EPB42         | erythrocyte membrane protein band 4.2                    | Multiple_Complex |
| TC0500008975.hg.1 | 7.23  | 6.64  | 1.51  | 0.0005 | 0.0185 | HMB1          | histocompatibility (minor) HB-1                          | Multiple_Complex |
| TC0400011313.hg.1 | 13.69 | 15.78 | -4.25 | 0.0005 | 0.0186 | SNCA          | synuclein alpha                                          | Multiple_Complex |
| TC0400008318.hg.1 | 11.76 | 12.65 | -1.85 | 0.0005 | 0.019  | TET2          | tet methylcytosine dioxygenase 2                         | Multiple_Complex |
| TC0700010046.hg.1 | 6.04  | 5.6   | 1.35  | 0.0005 | 0.0191 | FTSJ2         | FtsJ RNA methyltransferase homolog 2 (E. coli)           | Multiple_Complex |
| TC0300008558.hg.1 | 11.52 | 10.21 | 2.46  | 0.0005 | 0.0191 | DTX3L         | deltex 3 like, E3 ubiquitin ligase                       | Multiple_Complex |
| TC0200008230.hg.1 | 12.79 | 11.66 | 2.2   | 0.0005 | 0.0191 | TMSB10        | thymosin beta 10                                         | Multiple_Complex |
| TC1900011776.hg.1 | 4.68  | 4.15  | 1.44  | 0.0005 | 0.0193 | KCNJ14        | potassium channel, inwardly rectifying subfamily J, r    | Multiple_Complex |
| TC0600014202.hg.1 | 5.93  | 6.61  | -1.6  | 0.0005 | 0.0194 | FGFR10P       | FGFR1 oncogene partner                                   | Multiple_Complex |
| TC0100006874.hg.1 | 9.21  | 8.76  | 1.36  | 0.0005 | 0.0195 | PLOD1         | procollagen-lysine, 2-oxoglutarate 5-dioxygenase 1       | Multiple_Complex |
| TC0700008868.hg.1 | 12    | 11.38 | 1.53  | 0.0005 | 0.0195 | TES           | testin LIM domain protein                                | Multiple_Complex |
| TC0500013010.hg.1 | 7.4   | 7.04  | 1.29  | 0.0005 | 0.0196 | NHP2          | NHP2 ribonucleoprotein                                   | Multiple_Complex |
| TC1900011153.hg.1 | 6.98  | 6.39  | 1.5   | 0.0005 | 0.0196 | RRAS          | related RAS viral (r-ras) oncogene homolog               | Multiple_Complex |

|                   |       |       |       |        |        |                 |                                                       |                  |
|-------------------|-------|-------|-------|--------|--------|-----------------|-------------------------------------------------------|------------------|
| TC1200009749.hg.1 | 4.22  | 4.69  | -1.38 | 0.0005 | 0.0196 | PIANP           | PILR alpha associated neural protein                  | Coding           |
| TC0600011354.hg.1 | 5.55  | 6.21  | -1.58 | 0.0005 | 0.0198 | TRIM10          | tripartite motif containing 10                        | Coding           |
| TC0200008351.hg.1 | 6.08  | 7.18  | -2.15 | 0.0005 | 0.0198 | RPIA            | ribose 5-phosphate isomerase A                        | Multiple_Complex |
| TC1000010273.hg.1 | 3.3   | 3.63  | -1.26 | 0.0005 | 0.0198 | NRP1            | neuropilin 1                                          | Multiple_Complex |
| TC1500008309.hg.1 | 5.48  | 4.9   | 1.49  | 0.0005 | 0.0199 | ZNF774          | zinc finger protein 774                               | Multiple_Complex |
| TC1100008054.hg.1 | 8.94  | 9.78  | -1.79 | 0.0005 | 0.0201 | PACS1           | phosphofurin acidic cluster sorting protein 1         | Multiple_Complex |
| TC0200016412.hg.1 | 5.06  | 5.54  | -1.4  | 0.0005 | 0.0202 | MFSD2B          | major facilitator superfamily domain containing 2B    | Multiple_Complex |
| TC0800011334.hg.1 | 9.84  | 9.12  | 1.65  | 0.0005 | 0.0202 | KLF10           | Kruppel-like factor 10                                | Multiple_Complex |
| TC1400008333.hg.1 | 14.47 | 13.86 | 1.53  | 0.0005 | 0.0202 | PPP2R5C         | protein phosphatase 2, regulatory subunit B, gamma    | Multiple_Complex |
| TC1900006730.hg.1 | 6.42  | 7.21  | -1.73 | 0.0005 | 0.0203 | KDM4B           | lysine (K)-specific demethylase 4B                    | Multiple_Complex |
| TC1900011994.hg.1 | 4.59  | 4.33  | 1.2   | 0.0006 | 0.0204 | CGB1            | chorionic gonadotropin, beta polypeptide 1            | Coding           |
| TC1600010617.hg.1 | 5.46  | 4.95  | 1.42  | 0.0006 | 0.0204 | KIAA0895L       | KIAA0895-like                                         | Multiple_Complex |
| TC0400011013.hg.1 | 10.88 | 12.76 | -3.67 | 0.0006 | 0.0204 | PPBP            | pro-platelet basic protein                            | Coding           |
| TC1200011471.hg.1 | 7.28  | 7.81  | -1.44 | 0.0006 | 0.0204 | POC1B; POC1B-G  | POC1 centriolar protein B; POC1B-GALNT4 readthrou     | Multiple_Complex |
| TC0100018539.hg.1 | 6.39  | 7.1   | -1.64 | 0.0006 | 0.0204 | LHX4-AS1; ACBD6 | LHX4 antisense RNA 1; acyl-CoA binding domain cont    | NonCoding        |
| TC1200012654.hg.1 | 6.5   | 6.18  | 1.25  | 0.0006 | 0.0204 | TSFM            | Ts translation elongation factor, mitochondrial       | Multiple_Complex |
| TC1200009196.hg.1 | 7.09  | 8.18  | -2.13 | 0.0006 | 0.0204 | MLXIP           | MLX interacting protein                               | Multiple_Complex |
| TC0700010965.hg.1 | 5.96  | 5.22  | 1.67  | 0.0006 | 0.0204 | IGFBP3          | insulin like growth factor binding protein 3          | Multiple_Complex |
| TC0900010147.hg.1 | 5.67  | 6.62  | -1.93 | 0.0006 | 0.0204 | CNTNAP3B        | contactin associated protein-like 3B                  | Multiple_Complex |
| TC0300013828.hg.1 | 10.47 | 11.01 | -1.46 | 0.0006 | 0.0205 | RBM6            | RNA binding motif protein 6                           | Multiple_Complex |
| TC1700009385.hg.1 | 10.59 | 11.48 | -1.85 | 0.0006 | 0.0205 | SLC43A2         | solute carrier family 43 (amino acid system L transpo | Multiple_Complex |
| TC1800009203.hg.1 | 8.53  | 7.68  | 1.8   | 0.0006 | 0.0205 | PQLC1           | PQ loop repeat containing 1                           | Multiple_Complex |
| TC0X00007557.hg.1 | 9.92  | 10.65 | -1.65 | 0.0006 | 0.0205 | MED12           | mediator complex subunit 12                           | Multiple_Complex |
| TC2200009357.hg.1 | 9.45  | 10.22 | -1.71 | 0.0006 | 0.0205 | PAC SIN2        | protein kinase C and casein kinase substrate in neuro | Multiple_Complex |
| TC1100008761.hg.1 | 5.72  | 5.24  | 1.39  | 0.0006 | 0.0205 | FAT3            | FAT atypical cadherin 3                               | Multiple_Complex |
| TC0800006966.hg.1 | 6.92  | 6.39  | 1.44  | 0.0006 | 0.0206 | NPM2            | nucleophosmin/nucleoplasmin 2                         | Multiple_Complex |
| TC0600007278.hg.1 | 6.47  | 5.57  | 1.87  | 0.0006 | 0.0209 | HIST1H2BE       | histone cluster 1, H2be                               | Coding           |
| TC0Y00006890.hg.1 | 6.42  | 6     | 1.34  | 0.0006 | 0.0209 | ZBED1           | zinc finger, BED-type containing 1                    | Multiple_Complex |
| TC0200014991.hg.1 | 9.86  | 10.54 | -1.6  | 0.0006 | 0.0209 | GPR155          | G protein-coupled receptor 155                        | Multiple_Complex |
| TC0200009813.hg.1 | 6.51  | 5.95  | 1.47  | 0.0006 | 0.0209 | PSMD14          | proteasome 26S subunit, non-ATPase 14                 | Multiple_Complex |
| TC1200006555.hg.1 | 13.84 | 12.95 | 1.85  | 0.0006 | 0.021  | CCND2           | cyclin D2                                             | Multiple_Complex |
| TC0200012652.hg.1 | 7.65  | 6.97  | 1.61  | 0.0006 | 0.0211 | PNPT1           | polyribonucleotide nucleotidyltransferase 1           | Multiple_Complex |
| TC1000009810.hg.1 | 6.51  | 7.48  | -1.97 | 0.0006 | 0.0211 | NUDTS5          | nudix hydrolase 5                                     | Multiple_Complex |
| TC1900010715.hg.1 | 6.42  | 5.97  | 1.37  | 0.0006 | 0.0211 | NUMBL           | numb homolog (Drosophila)-like                        | Multiple_Complex |
| TC0500012781.hg.1 | 10.46 | 8.7   | 3.37  | 0.0006 | 0.0212 | DOCK2           | Memczak2013 ANTISENSE, CDS, coding, INTERNAL be       | NonCoding        |
| TC2200009352.hg.1 | 8.65  | 9.31  | -1.58 | 0.0006 | 0.0212 | LOC400927; CSN1 | TPTE and PTEN homologous inositol lipid phosphatas    | Multiple_Complex |
| TC1600010651.hg.1 | 9.8   | 11.67 | -3.67 | 0.0006 | 0.0215 | RANBP10         | RAN binding protein 10                                | Multiple_Complex |
| TC1100012469.hg.1 | 5.54  | 5.05  | 1.4   | 0.0006 | 0.0215 | SCN4B           | sodium channel, voltage gated, type IV beta subunit   | Multiple_Complex |
| TC0400012824.hg.1 | 5.18  | 4.72  | 1.37  | 0.0006 | 0.0215 | HERC3           | HECT and RLD domain containing E3 ubiquitin protei    | NonCoding        |
| TC1700006773.hg.1 | 6.26  | 7.1   | -1.79 | 0.0006 | 0.0215 | TMEM88          | transmembrane protein 88                              | Coding           |
| TC0100008094.hg.1 | 11.26 | 10.8  | 1.38  | 0.0006 | 0.0215 | RNF220          | ring finger protein 220                               | Multiple_Complex |
| TC1100007257.hg.1 | 9.87  | 11.33 | -2.75 | 0.0006 | 0.0215 | CAT             | catalase                                              | Multiple_Complex |
| TC0100016072.hg.1 | 4     | 4.49  | -1.4  | 0.0006 | 0.0215 | OR6P1           | olfactory receptor, family 6, subfamily P, member 1   | Coding           |
| TC1500009636.hg.1 | 12.35 | 10.92 | 2.7   | 0.0006 | 0.0217 | ANXA2           | annexin A2                                            | Multiple_Complex |
| TC1900010391.hg.1 | 8.8   | 8.26  | 1.46  | 0.0006 | 0.0217 | PEPD            | peptidase D                                           | Multiple_Complex |
| TC1600011361.hg.1 | 4.24  | 4.93  | -1.6  | 0.0006 | 0.0217 | ACSM3           | acyl-CoA synthetase medium-chain family member 3      | NonCoding        |
| TSUnmapped0000000 | 8.19  | 9.54  | -2.55 | 0.0006 | 0.0217 | MLXIP           | MLX interacting protein                               | Coding           |
| TC0100008056.hg.1 | 3.41  | 3.89  | -1.4  | 0.0006 | 0.0218 | MPL             | MPL proto-oncogene, thrombopoietin receptor           | Coding           |
| TC1000007678.hg.1 | 6.67  | 5.93  | 1.68  | 0.0006 | 0.0218 | MTRNR2L5        | MT-RNR2-like 5                                        | Coding           |
| TC0100017022.hg.1 | 3.56  | 3.91  | -1.27 | 0.0006 | 0.0218 | GOLT1A          | golgi transport 1A                                    | Multiple_Complex |
| TC1100011161.hg.1 | 9.04  | 8.32  | 1.64  | 0.0006 | 0.0219 | TRMT112         | tRNA methyltransferase 11-2 homolog (S. cerevisiae)   | Multiple_Complex |
| TC0900008933.hg.1 | 8.25  | 7.53  | 1.65  | 0.0006 | 0.0219 | TOR1B           | torsin family 1, member B (torsin B)                  | Multiple_Complex |
| TC1600011570.hg.1 | 6.86  | 6.18  | 1.6   | 0.0006 | 0.0219 | CMC2            | C-x(9)-C motif containing 2                           | Multiple_Complex |
| TC1700008769.hg.1 | 8.22  | 9.57  | -2.55 | 0.0006 | 0.022  | KCNJ2           | potassium channel, inwardly rectifying subfamily J, m | Coding           |
| TC2000009588.hg.1 | 6.62  | 5.9   | 1.65  | 0.0006 | 0.022  | MTRNR2L3        | MT-RNR2-like 3                                        | Coding           |
| TC1600007235.hg.1 | 8.17  | 7.09  | 2.12  | 0.0006 | 0.022  | PLK1            | polo-like kinase 1                                    | Multiple_Complex |
| TC0100013696.hg.1 | 10.33 | 9.82  | 1.42  | 0.0006 | 0.022  | PSMB2           | proteasome subunit beta 2                             | Multiple_Complex |
| TC1200012790.hg.1 | 9.37  | 10.33 | -1.96 | 0.0006 | 0.022  | KMT2D           | lysine (K)-specific methyltransferase 2D              | Multiple_Complex |
| TC0100016971.hg.1 | 16.89 | 18    | -2.17 | 0.0006 | 0.022  | ADIPOR1         | adiponectin receptor 1                                | Multiple_Complex |
| TC2000006899.hg.1 | 10.45 | 11.17 | -1.65 | 0.0007 | 0.0222 | XRN2            | 5-3 exoribonuclease 2                                 | Multiple_Complex |
| TC1900007831.hg.1 | 5.85  | 5.36  | 1.41  | 0.0007 | 0.0223 | HPN             | hepsin                                                | Multiple_Complex |
| TC0500011523.hg.1 | 7.22  | 6.16  | 2.09  | 0.0007 | 0.0223 | LNPEP           | Memczak2013 ANTISENSE, coding, INTERNAL, UTR3 t       | NonCoding        |
| TC1100012685.hg.1 | 5.62  | 6.07  | -1.37 | 0.0007 | 0.0223 | VSIG2           | V-set and immunoglobulin domain containing 2          | Coding           |
| TC0200012038.hg.1 | 5.5   | 4.8   | 1.63  | 0.0007 | 0.0225 | OTOF            | otofelin                                              | Multiple_Complex |
| TC1900007115.hg.1 | 6.25  | 6.73  | -1.4  | 0.0007 | 0.0225 | NFIX            | nuclear factor I/X (CCAAT-binding transcription facto | Multiple_Complex |
| TC0100013076.hg.1 | 8.44  | 10.05 | -3.06 | 0.0007 | 0.0226 | PADI2           | peptidyl arginine deiminase, type II                  | Multiple_Complex |
| TC0800007384.hg.1 | 5.5   | 4.94  | 1.47  | 0.0007 | 0.0226 | IDO2            | indoleamine 2,3-dioxygenase 2                         | Multiple_Complex |
| TC0900009253.hg.1 | 8.8   | 8.52  | 1.21  | 0.0007 | 0.0226 | C9orf142        | chromosome 9 open reading frame 142                   | Multiple_Complex |
| TC2000008267.hg.1 | 13.89 | 14.83 | -1.91 | 0.0007 | 0.0226 | RASSF2          | Ras association (RalGDS/AF-6) domain family membe     | Multiple_Complex |
| TC0400011202.hg.1 | 8.81  | 9.48  | -1.59 | 0.0007 | 0.0228 | COQ2            | coenzyme Q2 4-hydroxybenzoate polyprenyltransfer      | Multiple_Complex |
| TC0300010775.hg.1 | 17.13 | 15.66 | 2.77  | 0.0007 | 0.0228 | CX3CR1          | chemokine (C-X3-C motif) receptor 1                   | Coding           |
| TC1200011936.hg.1 | 9.53  | 10.37 | -1.8  | 0.0007 | 0.0229 | ATXN2           | ataxin 2                                              | Multiple_Complex |

|                     |       |       |       |        |        |                |                                                         |                  |
|---------------------|-------|-------|-------|--------|--------|----------------|---------------------------------------------------------|------------------|
| TC0800010252.hg.1   | 8.59  | 11.11 | -5.74 | 0.0007 | 0.0229 | ANK1           | ankyrin 1, erythrocytic                                 | Multiple_Complex |
| TC11_KI270721v1_rai | 5.48  | 5.07  | 1.32  | 0.0007 | 0.0229 | MRPL23; LOC102 | Homo sapiens mitochondrial ribosomal protein L23 (      | Coding           |
| TC0300013985.hg.1   | 6.35  | 5.89  | 1.37  | 0.0007 | 0.0229 | TUSC2          | tumor suppressor candidate 2                            | Multiple_Complex |
| TC0300006677.hg.1   | 13.81 | 14.6  | -1.72 | 0.0007 | 0.023  | SLC6A6         | solute carrier family 6 (neurotransmitter transporter,  | Multiple_Complex |
| TC0200007015.hg.1   | 13.15 | 12.27 | 1.84  | 0.0007 | 0.023  | RAB10          | RAB10, member RAS oncogene family                       | Multiple_Complex |
| TC0300008385.hg.1   | 6.45  | 5.93  | 1.43  | 0.0007 | 0.023  | TIGIT          | T-cell immunoreceptor with Ig and ITIM domains          | Multiple_Complex |
| TC1900010632.hg.1   | 8.63  | 8.08  | 1.46  | 0.0007 | 0.023  | SIRT2          | sirtuin 2                                               | Multiple_Complex |
| TC1900007313.hg.1   | 8.99  | 8.38  | 1.52  | 0.0007 | 0.023  | USE1           | unconventional SNARE in the ER 1 homolog (S. cerev      | Multiple_Complex |
| TC1100009434.hg.1   | 5.5   | 4.99  | 1.43  | 0.0007 | 0.023  | DDX25          | DEAD (Asp-Glu-Ala-Asp) box helicase 25                  | Multiple_Complex |
| TC1400010763.hg.1   | 6.37  | 5.84  | 1.45  | 0.0007 | 0.0231 | TMEM229B       | transmembrane protein 229B                              | Coding           |
| TC0300010632.hg.1   | 7.23  | 8.18  | -1.92 | 0.0007 | 0.0231 | OSBPL10        | oxysterol binding protein-like 10                       | Multiple_Complex |
| TC0500012948.hg.1   | 5.67  | 5.28  | 1.32  | 0.0007 | 0.0233 | SNCB           | synuclein beta                                          | Multiple_Complex |
| TC1400007098.hg.1   | 12.54 | 12.09 | 1.37  | 0.0007 | 0.0233 | ARF6           | ADP-ribosylation factor 6                               | Multiple_Complex |
| TC0500013236.hg.1   | 6.17  | 6.48  | -1.24 | 0.0007 | 0.0233 | FAM53C         | family with sequence similarity 53, member C            | NonCoding        |
| TC0600007285.hg.1   | 8.96  | 8.11  | 1.8   | 0.0007 | 0.0233 | HIST1H2AE      | histone cluster 1, H2ae                                 | Coding           |
| TC0X00007363.hg.1   | 6.9   | 6.49  | 1.34  | 0.0007 | 0.0233 | MAGED2         | MAGE family member D2                                   | Multiple_Complex |
| TC0900009882.hg.1   | 14.95 | 16.83 | -3.69 | 0.0007 | 0.0233 | DCAF12         | DDB1 and CUL4 associated factor 12                      | Multiple_Complex |
| TC1300007167.hg.1   | 12.1  | 11.31 | 1.73  | 0.0007 | 0.0233 | PHF11          | PHD finger protein 11                                   | Multiple_Complex |
| TC1600007957.hg.1   | 16.17 | 13.82 | 5.1   | 0.0007 | 0.0234 | MT2A           | metallothionein 2A                                      | Multiple_Complex |
| TC1900008558.hg.1   | 6.88  | 8     | -2.17 | 0.0007 | 0.0234 | MED25; MIR6800 | mediator complex subunit 25; microRNA 6800              | Multiple_Complex |
| TC0800006968.hg.1   | 5.28  | 4.89  | 1.31  | 0.0007 | 0.0234 | FGF17          | fibroblast growth factor 17                             | Multiple_Complex |
| TC1000011736.hg.1   | 8.06  | 8.79  | -1.66 | 0.0007 | 0.0234 | OBFC1          | oligonucleotide/oligosaccharide-binding fold contain    | Multiple_Complex |
| TC1200009913.hg.1   | 15.27 | 17.08 | -3.5  | 0.0007 | 0.0234 | YBX3           | Y box binding protein 3                                 | Multiple_Complex |
| TC1700011032.hg.1   | 6.45  | 6.05  | 1.32  | 0.0007 | 0.0235 | GNGT2          | guanine nucleotide binding protein (G protein), gamma   | Coding           |
| TC0600012240.hg.1   | 13    | 13.73 | -1.65 | 0.0007 | 0.0236 | LMBRD1         | LMBR1 domain containing 1                               | Multiple_Complex |
| TC1200008683.hg.1   | 14.15 | 14.86 | -1.63 | 0.0007 | 0.0236 | CHST11         | carbohydrate (chondroitin 4) sulfotransferase 11        | Multiple_Complex |
| TC0700012797.hg.1   | 12.79 | 11.51 | 2.42  | 0.0007 | 0.0237 | PARP12         | poly(ADP-ribose) polymerase family member 12            | Multiple_Complex |
| TC0200007047.hg.1   | 3.9   | 3.54  | 1.28  | 0.0007 | 0.0239 | DPYSL5         | dihydropyrimidinase-like 5                              | Multiple_Complex |
| TC0100013561.hg.1   | 4.65  | 4.17  | 1.4   | 0.0007 | 0.0239 | FABP3          | fatty acid binding protein 3, muscle and heart          | Multiple_Complex |
| TC0600014256.hg.1   | 9.28  | 9.89  | -1.53 | 0.0007 | 0.0239 | GABBR1         | gamma-aminobutyric acid (GABA) B receptor, 1            | Multiple_Complex |
| TC0100006862.hg.1   | 7.38  | 6.38  | 2     | 0.0008 | 0.024  | FBXO6          | F-box protein 6                                         | Multiple_Complex |
| TC0900008150.hg.1   | 8.59  | 10.32 | -3.31 | 0.0008 | 0.0241 | TMOD1          | tropomodulin 1                                          | Multiple_Complex |
| TC2100007039.hg.1   | 7.47  | 8     | -1.44 | 0.0008 | 0.0242 | DOPEY2         | dopey family member 2                                   | Multiple_Complex |
| TC0700013512.hg.1   | 9.65  | 9.2   | 1.37  | 0.0008 | 0.0242 | CCZ1B          | CCZ1 homolog B, vacuolar protein trafficking and bio    | Multiple_Complex |
| TC1200010983.hg.1   | 7.13  | 8.03  | -1.86 | 0.0008 | 0.0242 | AVIL           | advillin                                                | Multiple_Complex |
| TC0600011508.hg.1   | 11.39 | 10.58 | 1.76  | 0.0008 | 0.0242 | TAP1           | transporter 1, ATP-binding cassette, sub-family B (MI   | Multiple_Complex |
| TC0100007291.hg.1   | 6.52  | 5.91  | 1.53  | 0.0008 | 0.0243 | C1QC           | complement component 1, q subcomponent, C chair         | Coding           |
| TC1900011033.hg.1   | 12.26 | 11.29 | 1.96  | 0.0008 | 0.0243 | NAPA           | N-ethylmaleimide-sensitive factor attachment protei     | Multiple_Complex |
| TC0700013435.hg.1   | 5.73  | 6.15  | -1.34 | 0.0008 | 0.0243 | CDHR3          | cadherin-related family member 3                        | NonCoding        |
| TC0300010982.hg.1   | 7.92  | 8.66  | -1.67 | 0.0008 | 0.0243 | SCAP           | SREBF chaperone                                         | Multiple_Complex |
| TC1200011993.hg.1   | 8.73  | 9.4   | -1.6  | 0.0008 | 0.0244 | SLC8B1         | solute carrier family 8 (sodium/lithium/calcium exch    | Multiple_Complex |
| TC1900010798.hg.1   | 6.75  | 6.2   | 1.46  | 0.0008 | 0.0244 | PAFAH1B3       | platelet-activating factor acetylhydrolase 1b, catalyti | Multiple_Complex |
| TC0100013275.hg.1   | 5.04  | 5.44  | -1.31 | 0.0008 | 0.0245 | ZNF436         | zinc finger protein 436                                 | Coding           |
| TC1700010686.hg.1   | 6.6   | 5.73  | 1.84  | 0.0008 | 0.0245 | JUP            | junction plakoglobin                                    | Multiple_Complex |
| TC0700013050.hg.1   | 5.14  | 5.8   | -1.59 | 0.0008 | 0.0245 | KCNH2          | potassium channel, voltage gated eag related subfan     | Multiple_Complex |
| TC2200007273.hg.1   | 13.6  | 14.9  | -2.45 | 0.0008 | 0.0247 | CSF2RB         | colony stimulating factor 2 receptor, beta, low-affinit | Multiple_Complex |
| TC2000006818.hg.1   | 6.24  | 5.67  | 1.48  | 0.0008 | 0.0248 | PET117; CSR2BP | PET117 homolog; CSR2 binding protein                    | Multiple_Complex |
| TC0X00008848.hg.1   | 5.84  | 5.36  | 1.39  | 0.0008 | 0.0249 | CTAG1B; CTAG1A | cancer/testis antigen 1B; cancer/testis antigen 1A      | Coding           |
| TC0300013420.hg.1   | 8.91  | 10.22 | -2.49 | 0.0008 | 0.0249 | IGFBP2         | insulin-like growth factor 2 mRNA binding protein 2     | Multiple_Complex |
| TC1400010068.hg.1   | 9.6   | 10.49 | -1.85 | 0.0008 | 0.025  | DICER1         | dicer 1, ribonuclease type III                          | Multiple_Complex |
| TC0600011546.hg.1   | 9.29  | 8.62  | 1.59  | 0.0008 | 0.025  | CUTA           | cutA divalent cation tolerance homolog (E. coli)        | Multiple_Complex |
| TC1600007531.hg.1   | 11.02 | 12.02 | -2    | 0.0008 | 0.0251 | ITGAX          | integrin alpha X                                        | Multiple_Complex |
| TC0100010664.hg.1   | 6.65  | 7.33  | -1.61 | 0.0008 | 0.0251 | ZBTB37         | zinc finger and BTB domain containing 37                | Multiple_Complex |
| TC0200014170.hg.1   | 10.59 | 11.44 | -1.81 | 0.0008 | 0.0251 | MAP3K2         | mitogen-activated protein kinase kinase kinase 2        | Multiple_Complex |
| TC0100015206.hg.1   | 6.7   | 6.23  | 1.39  | 0.0008 | 0.0252 | GNAT2          | guanine nucleotide binding protein (G protein), alpha   | Coding           |
| TC0700013441.hg.1   | 10.31 | 11.48 | -2.26 | 0.0008 | 0.0258 | IFRD1          | interferon-related developmental regulator 1            | Multiple_Complex |
| TC1100008002.hg.1   | 7.13  | 6.45  | 1.59  | 0.0008 | 0.0259 | MRPL49         | mitochondrial ribosomal protein L49                     | Multiple_Complex |
| TC1200008434.hg.1   | 4.85  | 5.33  | -1.39 | 0.0008 | 0.0259 | C12orf74       | chromosome 12 open reading frame 74                     | Coding           |
| TC1900011942.hg.1   | 7.76  | 7.14  | 1.54  | 0.0009 | 0.0261 | SARS2          | seryl-tRNA synthetase 2, mitochondrial                  | Multiple_Complex |
| TC1900006968.hg.1   | 7.5   | 6.78  | 1.65  | 0.0009 | 0.0261 | C19orf66       | chromosome 19 open reading frame 66                     | Multiple_Complex |
| TC1400007033.hg.1   | 8.21  | 8.63  | -1.34 | 0.0009 | 0.0261 | FAM179B        | family with sequence similarity 179, member B           | Multiple_Complex |
| TC1900009669.hg.1   | 5.44  | 5.63  | -1.15 | 0.0009 | 0.0262 | KANK2          | KN motif and ankyrin repeat domains 2                   | Multiple_Complex |
| TC0600011483.hg.1   | 10.33 | 11.05 | -1.65 | 0.0009 | 0.0263 | PBX2           | pre-B-cell leukemia homeobox 2                          | Multiple_Complex |
| TC0100012401.hg.1   | 5.21  | 5.95  | -1.66 | 0.0009 | 0.0263 | OR4F29; OR4F3; | olfactory receptor, family 4, subfamily F, member 29,   | Coding           |
| TC0100012410.hg.1   | 5.21  | 5.95  | -1.66 | 0.0009 | 0.0263 | OR4F16; OR4F29 | olfactory receptor, family 4, subfamily F, member 16,   | Coding           |
| TC0300013447.hg.1   | 7.88  | 7.46  | 1.34  | 0.0009 | 0.0263 | RFC4           | replication factor C subunit 4                          | Multiple_Complex |
| TC0200010448.hg.1   | 14.9  | 17.68 | -6.87 | 0.0009 | 0.0265 | STRADB         | STE20-related kinase adaptor beta                       | Multiple_Complex |
| TC1200008525.hg.1   | 5.55  | 5.18  | 1.29  | 0.0009 | 0.0265 | SNRPF          | small nuclear ribonucleoprotein polypeptide F           | Multiple_Complex |
| TC0400010449.hg.1   | 8.87  | 9.66  | -1.74 | 0.0009 | 0.0265 | TLR10          | toll-like receptor 10                                   | Multiple_Complex |
| TC1000008397.hg.1   | 13.26 | 10.08 | 9.08  | 0.0009 | 0.0267 | IFIT3          | interferon-induced protein with tetratricopeptide rep   | Coding           |
| TC0200015402.hg.1   | 10.92 | 11.95 | -2.03 | 0.0009 | 0.0268 | FAM126B        | family with sequence similarity 126, member B           | Multiple_Complex |
| TC2000008001.hg.1   | 7.97  | 7.4   | 1.48  | 0.0009 | 0.0268 | ADRM1          | adhesion regulating molecule 1                          | Multiple_Complex |

|                   |       |       |       |        |        |                |                                                                       |                  |
|-------------------|-------|-------|-------|--------|--------|----------------|-----------------------------------------------------------------------|------------------|
| TC0900006782.hg.1 | 7.51  | 8     | -1.41 | 0.0009 | 0.0269 | FOCAD          | focadhesin                                                            | Multiple_Complex |
| TC1500009736.hg.1 | 13.24 | 12.46 | 1.72  | 0.0009 | 0.0269 | PIIB           | peptidylprolyl isomerase B (cyclophilin B)                            | Multiple_Complex |
| TC0400010940.hg.1 | 9.1   | 10.4  | -2.45 | 0.0009 | 0.027  | SULT1B1        | sulfotransferase family 1B member 1                                   | Coding           |
| TC0X00007501.hg.1 | 7.89  | 7.45  | 1.35  | 0.0009 | 0.0271 | YIPF6          | Yip1 domain family member 6                                           | Multiple_Complex |
| TC1500007546.hg.1 | 5.65  | 6.22  | -1.48 | 0.0009 | 0.0274 | SNX22          | sorting nexin 22                                                      | Multiple_Complex |
| TC0400011283.hg.1 | 9.37  | 8.72  | 1.56  | 0.0009 | 0.0275 | PPM1K          | protein phosphatase, Mg <sup>2+</sup> /Mn <sup>2+</sup> dependent, 1K | Multiple_Complex |
| TC0300012813.hg.1 | 8.81  | 10.18 | -2.59 | 0.0009 | 0.0275 | P2RY14         | purinergic receptor P2Y, G-protein coupled, 14                        | Coding           |
| TC0600006993.hg.1 | 10.69 | 10.17 | 1.44  | 0.0009 | 0.0275 | NOL7           | nucleolar protein 7                                                   | Multiple_Complex |
| TC1300010036.hg.1 | 3.68  | 4.19  | -1.42 | 0.0009 | 0.0277 | LINC00598      | long intergenic non-protein coding RNA 598                            | NonCoding        |
| TC0200016668.hg.1 | 6.17  | 6.7   | -1.44 | 0.0009 | 0.0278 | GPR75          | G protein-coupled receptor 75                                         | Coding           |
| TC1500006948.hg.1 | 5.21  | 5.74  | -1.45 | 0.0009 | 0.0278 | PHGR1          | proline/histidine/glycine-rich 1                                      | Multiple_Complex |
| TC1700008549.hg.1 | 7.23  | 7.64  | -1.33 | 0.0009 | 0.0278 | TANC2          | tetratricopeptide repeat, ankyrin repeat and coiled-c                 | Multiple_Complex |
| TC0500007663.hg.1 | 10.44 | 9.98  | 1.38  | 0.0009 | 0.0278 | SLC30A5        | solute carrier family 30 (zinc transporter), member 5                 | Multiple_Complex |
| TC0900011597.hg.1 | 9.64  | 10.56 | -1.88 | 0.0009 | 0.0279 | SH2D3C         | SH2 domain containing 3C                                              | Multiple_Complex |
| TC1100011014.hg.1 | 6.13  | 6.9   | -1.71 | 0.001  | 0.0279 | SLC15A3        | solute carrier family 15 (oligopeptide transporter), m                | Multiple_Complex |
| TC1900007447.hg.1 | 9.92  | 9.31  | 1.53  | 0.001  | 0.0279 | ZNF101         | zinc finger protein 101                                               | Multiple_Complex |
| TC0600014328.hg.1 | 11.49 | 10.49 | 2     | 0.001  | 0.0282 | OSTM1          | osteopetrosis associated transmembrane protein 1                      | Multiple_Complex |
| TC1100011126.hg.1 | 6.61  | 6.21  | 1.32  | 0.001  | 0.0282 | PLA2G16        | phospholipase A2, group XVI                                           | Multiple_Complex |
| TC0100018280.hg.1 | 13.73 | 12.84 | 1.85  | 0.001  | 0.0282 | FAM231D; LINC0 | family with sequence similarity 231, member D; long                   | Multiple_Complex |
| TC2000009198.hg.1 | 5.17  | 4.62  | 1.46  | 0.001  | 0.0283 | ADA            | adenosine deaminase                                                   | Multiple_Complex |
| TC1700009318.hg.1 | 10.42 | 11.64 | -2.33 | 0.001  | 0.0283 | FAM101B        | family with sequence similarity 101, member B                         | Multiple_Complex |
| TC0600009144.hg.1 | 7.92  | 8.61  | -1.61 | 0.001  | 0.0283 | KIAA1919       | KIAA1919                                                              | Multiple_Complex |
| TC1600007967.hg.1 | 6.22  | 5.23  | 1.98  | 0.001  | 0.0283 | MT1IP          | metallothionein 1I, pseudogene                                        | Multiple_Complex |
| TC1100007978.hg.1 | 12.39 | 11.84 | 1.47  | 0.001  | 0.0283 | MEN1           | Jeck2013 ANTISENSE, CDS, coding, INTERNAL, OVCOI                      | NonCoding        |
| TC0600008050.hg.1 | 12.17 | 13.14 | -1.96 | 0.001  | 0.0283 | UBR2           | ubiquitin protein ligase E3 component n-recognin 2                    | Multiple_Complex |
| TC1300006847.hg.1 | 7.24  | 6.79  | 1.36  | 0.001  | 0.0283 | RFC3           | replication factor C subunit 3                                        | Multiple_Complex |
| TC0700012111.hg.1 | 4.14  | 4.8   | -1.58 | 0.001  | 0.0283 | FBXL13         | F-box and leucine-rich repeat protein 13                              | Multiple_Complex |
| TC0900010804.hg.1 | 6.29  | 5.94  | 1.27  | 0.001  | 0.0284 | IPPK           | inositol 1,3,4,5,6-pentakisphosphate 2-kinase                         | Multiple_Complex |
| TC0100011855.hg.1 | 11.73 | 12.91 | -2.27 | 0.001  | 0.0284 | GUK1           | guanylate kinase 1                                                    | Multiple_Complex |
| TC0400011014.hg.1 | 6.91  | 7.92  | -2.03 | 0.001  | 0.0285 | CXCL5          | chemokine (C-X-C motif) ligand 5                                      | Multiple_Complex |
| TC0400010048.hg.1 | 6.35  | 6.91  | -1.47 | 0.001  | 0.0285 | ZNF518B        | zinc finger protein 518B                                              | Multiple_Complex |
| TC0500011935.hg.1 | 6.26  | 6.91  | -1.57 | 0.001  | 0.0286 | 3-Mar          | membrane associated ring finger 3                                     | Multiple_Complex |
| TC0100006483.hg.1 | 6.49  | 5.55  | 1.91  | 0.001  | 0.0286 | ISG15          | ISG15 ubiquitin-like modifier                                         | Multiple_Complex |
| TC1900008566.hg.1 | 7.94  | 8.48  | -1.46 | 0.001  | 0.0286 | SIGLEC16       | sialic acid binding Ig-like lectin 16 (gene/pseudogene                | Multiple_Complex |
| TC1000009065.hg.1 | 7.02  | 7.7   | -1.61 | 0.001  | 0.0286 | FAM45A         | Transcript Identified by AceView, Entrez Gene ID(s) 4                 | Unassigned       |
| TC0100009969.hg.1 | 4.93  | 4.31  | 1.54  | 0.001  | 0.0286 | RIIAD1         | regulatory subunit of type II PKA R-subunit (RIIA) don                | Multiple_Complex |
| TC1900006896.hg.1 | 13.88 | 13.36 | 1.44  | 0.001  | 0.0286 | HNRNPM         | heterogeneous nuclear ribonucleoprotein M                             | Multiple_Complex |
| TC1900009755.hg.1 | 5.24  | 5.95  | -1.64 | 0.001  | 0.0286 | KLF1           | Kruppel-like factor 1 (erythroid)                                     | Multiple_Complex |
| TC2000007859.hg.1 | 13.03 | 14.94 | -3.76 | 0.001  | 0.029  | RBM38          | RNA binding motif protein 38                                          | Multiple_Complex |
| TC0100006881.hg.1 | 14.72 | 13.58 | 2.2   | 0.001  | 0.029  | TNFRSF1B; MIR4 | tumor necrosis factor receptor superfamily, member                    | Multiple_Complex |
| TC0500008855.hg.1 | 9.76  | 9.23  | 1.44  | 0.001  | 0.0291 | SLC35A4        | solute carrier family 35, member A4                                   | Multiple_Complex |
| TC1200010642.hg.1 | 3.81  | 4.25  | -1.36 | 0.001  | 0.0292 | FAIM2          | Fas apoptotic inhibitory molecule 2                                   | Coding           |
| TC0100016678.hg.1 | 13.26 | 14.55 | -2.45 | 0.001  | 0.0292 | FAM129A        | family with sequence similarity 129, member A                         | Multiple_Complex |
| TC0600007282.hg.1 | 7.24  | 6.45  | 1.72  | 0.001  | 0.0292 | HIST1H2BF      | histone cluster 1, H2bf                                               | Coding           |
| TC0600011227.hg.1 | 6.79  | 5.8   | 1.99  | 0.001  | 0.0293 | HIST1H4K       | histone cluster 1, H4k                                                | Coding           |
| TSUnmapped000004  | 8.97  | 8.53  | 1.35  | 0.001  | 0.0293 | SURF4          | surfeit 4                                                             | NonCoding        |
| TC0200008063.hg.1 | 8.18  | 7.67  | 1.43  | 0.001  | 0.0294 | DGUOK          | deoxyguanosine kinase                                                 | Multiple_Complex |
| TC1600010599.hg.1 | 7.16  | 6.36  | 1.74  | 0.001  | 0.0294 | NAE1           | NEDD8 activating enzyme E1 subunit 1                                  | Multiple_Complex |
| TC0100016360.hg.1 | 9.21  | 9.96  | -1.68 | 0.001  | 0.0294 | SELL           | Memczak2013 ALT_ACCEPTOR, ALT_DONOR, coding, NonCoding                | NonCoding        |
| TC0500009652.hg.1 | 9.43  | 8.94  | 1.4   | 0.001  | 0.0294 | HNRNPAB        | heterogeneous nuclear ribonucleoprotein A/B                           | Multiple_Complex |
| TC2000008746.hg.1 | 6.81  | 6.45  | 1.28  | 0.0011 | 0.0295 | NINL           | ninein-like                                                           | Multiple_Complex |
| TC1500008114.hg.1 | 8.96  | 9.5   | -1.45 | 0.0011 | 0.0295 | TM6SF1         | transmembrane 6 superfamily member 1                                  | Multiple_Complex |
| TC1200012758.hg.1 | 6.65  | 7.37  | -1.65 | 0.0011 | 0.0295 | TAS2R14        | taste receptor, type 2, member 14                                     | Coding           |
| TC1200010601.hg.1 | 8.93  | 8.37  | 1.47  | 0.0011 | 0.0295 | FKBP11; ARF3   | FK506 binding protein 11; ADP-ribosylation factor 3                   | Multiple_Complex |
| TC1800008333.hg.1 | 8.34  | 7.74  | 1.52  | 0.0011 | 0.0295 | DHFR; DHFRP1   | dihydrofolate reductase; dihydrofolate reductase pse                  | Multiple_Complex |
| TC0X00006891.hg.1 | 9.2   | 10.03 | -1.78 | 0.0011 | 0.0296 | GK             | glycerol kinase                                                       | Multiple_Complex |
| TC0900009414.hg.1 | 8.32  | 8.93  | -1.53 | 0.0011 | 0.0297 | RFX3           | regulatory factor X, 3 (influences HLA class II expressi              | Multiple_Complex |
| TC0400011748.hg.1 | 7.19  | 6.16  | 2.05  | 0.0011 | 0.0298 | CCNA2          | cyclin A2                                                             | Multiple_Complex |
| TC0700010185.hg.1 | 11.42 | 13.07 | -3.13 | 0.0011 | 0.0298 | EIF2AK1        | eukaryotic translation initiation factor 2-alpha kinase               | Multiple_Complex |
| TC0100018233.hg.1 | 6.31  | 6.8   | -1.4  | 0.0011 | 0.0298 | FPGT           | fucose-1-phosphate guanylyltransferase                                | Coding           |
| TC0200009548.hg.1 | 8.17  | 8.69  | -1.43 | 0.0011 | 0.0298 | ARHGAP15       | Rho GTPase activating protein 15                                      | NonCoding        |
| TC1200007595.hg.1 | 9.52  | 9.05  | 1.39  | 0.0011 | 0.0298 | SMARCD1        | SWI/SNF related, matrix associated, actin dependent                   | Multiple_Complex |
| TC1300009330.hg.1 | 10.35 | 10.84 | -1.4  | 0.0011 | 0.0299 | RBM26          | RNA binding motif protein 26                                          | Multiple_Complex |
| TC1200010908.hg.1 | 9.8   | 8.31  | 2.82  | 0.0011 | 0.0299 | STAT2          | signal transducer and activator of transcription 2                    | Multiple_Complex |
| TC1700011128.hg.1 | 10.53 | 11.13 | -1.51 | 0.0011 | 0.03   | SPAG9          | sperm associated antigen 9                                            | Multiple_Complex |
| TC0400012757.hg.1 | 11.97 | 11.14 | 1.78  | 0.0011 | 0.03   | RNF4           | ring finger protein 4                                                 | Multiple_Complex |
| TC0200007144.hg.1 | 9.06  | 9.73  | -1.6  | 0.0011 | 0.03   | LCLAT1         | lysocardiolipin acyltransferase 1                                     | Multiple_Complex |
| TC1000007574.hg.1 | 5.88  | 6.55  | -1.59 | 0.0011 | 0.03   | WDFY4          | WDFY family member 4                                                  | Multiple_Complex |
| TC0400012018.hg.1 | 6.54  | 8.32  | -3.44 | 0.0011 | 0.03   | GYPB           | glycophorin B (MNS blood group)                                       | Multiple_Complex |
| TC0800009231.hg.1 | 9.83  | 11.29 | -2.75 | 0.0011 | 0.03   | GRINA          | glutamate receptor, ionotropic, N-methyl D-aspartat                   | Multiple_Complex |
| TC0900011610.hg.1 | 4.69  | 5.58  | -1.86 | 0.0011 | 0.03   | ST6GALNAC4     | ST6 (alpha-N-acetyl-neuraminyl-2,3-beta-galactosyl-1                  | Multiple_Complex |
| TC1000012495.hg.1 | 7.57  | 7.15  | 1.33  | 0.0011 | 0.0301 | BORCS7         | BLOC-1 related complex subunit 7                                      | Multiple_Complex |

|                   |       |       |       |        |        |                  |                                                         |                  |
|-------------------|-------|-------|-------|--------|--------|------------------|---------------------------------------------------------|------------------|
| TC1900009346.hg.1 | 8.66  | 10.09 | -2.7  | 0.0011 | 0.0301 | UBXN6            | UBX domain protein 6                                    | Multiple_Complex |
| TSUnmapped000005: | 6.11  | 6.88  | -1.71 | 0.0011 | 0.0301 | DGKD             | diacylglycerol kinase, delta 130kDa                     | NonCoding        |
| TSUnmapped000002: | 4.72  | 5.2   | -1.4  | 0.0011 | 0.0301 | RPS6KA1          | ribosomal protein S6 kinase, 90kDa, polypeptide 1       | NonCoding        |
| TC1500007874.hg.1 | 9.99  | 10.88 | -1.85 | 0.0011 | 0.0301 | C15orf39         | chromosome 15 open reading frame 39                     | Coding           |
| TC1000007333.hg.1 | 9.65  | 10.47 | -1.76 | 0.0011 | 0.0302 | ZNF33A           | zinc finger protein 33A                                 | Multiple_Complex |
| TC1600009446.hg.1 | 11.92 | 12.97 | -2.06 | 0.0011 | 0.0302 | CPPED1           | calcineurin-like phosphoesterase domain containing      | Multiple_Complex |
| TC0100008271.hg.1 | 10.02 | 11.42 | -2.63 | 0.0011 | 0.0303 | RNF11            | ring finger protein 11                                  | Multiple_Complex |
| TC0600007769.hg.1 | 5.74  | 5.36  | 1.31  | 0.0011 | 0.0304 | SNRPC            | small nuclear ribonucleoprotein polypeptide C           | Multiple_Complex |
| TSUnmapped000007: | 3.16  | 3.66  | -1.41 | 0.0011 | 0.0305 | PRAMEF10         | PRAME family member 10                                  | Coding           |
| TC0300007479.hg.1 | 4.4   | 4.95  | -1.46 | 0.0011 | 0.0306 | PHF7             | PHD finger protein 7                                    | Multiple_Complex |
| TC0900008463.hg.1 | 8.17  | 8.93  | -1.7  | 0.0011 | 0.0306 | HSDL2            | hydroxysteroid dehydrogenase like 2                     | Multiple_Complex |
| TC0800012026.hg.1 | 7.02  | 7.99  | -1.96 | 0.0011 | 0.0306 | SLC45A4          | solute carrier family 45, member 4                      | Multiple_Complex |
| TC1400007307.hg.1 | 8.83  | 9.56  | -1.66 | 0.0011 | 0.0306 | ARID4A           | AT rich interactive domain 4A (RBP1-like)               | Multiple_Complex |
| TC1900011004.hg.1 | 7.23  | 8.25  | -2.02 | 0.0011 | 0.0306 | SLC1A5           | solute carrier family 1 (neutral amino acid transport   | Multiple_Complex |
| TC1200008685.hg.1 | 8.18  | 8.95  | -1.71 | 0.0011 | 0.0306 | CHST11           | Transcript Identified by AceView, Entrez Gene ID(s) 5   | Unassigned       |
| TC1000008005.hg.1 | 7.5   | 8.13  | -1.55 | 0.0011 | 0.0306 | MCU              | mitochondrial calcium uniporter                         | Multiple_Complex |
| TC0100014008.hg.1 | 7.13  | 6.78  | 1.27  | 0.0011 | 0.0306 | MUTYH            | mutY DNA glycosylase                                    | Multiple_Complex |
| TC1300008084.hg.1 | 8.16  | 9.14  | -1.96 | 0.0011 | 0.0306 | ATP11A           | ATPase, class VI, type 11A                              | Multiple_Complex |
| TC1100012917.hg.1 | 6.58  | 6.22  | 1.29  | 0.0012 | 0.0306 | NCAPD3           | non-SMC condensin II complex subunit D3                 | Multiple_Complex |
| TC0200015601.hg.1 | 7     | 7.73  | -1.65 | 0.0012 | 0.0306 | KANSL1L          | KAT8 regulatory NSL complex subunit 1 like              | Multiple_Complex |
| TC1300009905.hg.1 | 6.99  | 6.43  | 1.47  | 0.0012 | 0.0306 | LOC101928841; R  | collagen alpha-1(II) chain-like; novel transcript       | Multiple_Complex |
| TC1400009239.hg.1 | 8.79  | 7.93  | 1.81  | 0.0012 | 0.0307 | GCH1             | GTP cyclohydrolase 1                                    | Multiple_Complex |
| TC0800012475.hg.1 | 9.05  | 8.47  | 1.49  | 0.0012 | 0.0307 | JRK              | Jrk helix-turn-helix protein                            | Multiple_Complex |
| TC1900006470.hg.1 | 13.92 | 15.74 | -3.53 | 0.0012 | 0.0307 | BSG              | basigin (Ok blood group)                                | Multiple_Complex |
| TC1700012191.hg.1 | 14.13 | 13.25 | 1.84  | 0.0012 | 0.0307 | CD68             | CD68 molecule                                           | Coding           |
| TC1200012334.hg.1 | 17.43 | 16.87 | 1.47  | 0.0012 | 0.0307 | UBC              | ubiquitin C                                             | Multiple_Complex |
| TC0500012207.hg.1 | 5.44  | 4.91  | 1.44  | 0.0012 | 0.0308 | SPATA24          | spermatogenesis associated 24                           | Multiple_Complex |
| TC0X00007523.hg.1 | 4.68  | 4.33  | 1.27  | 0.0012 | 0.0308 | EDA              | ectodysplasin A                                         | Multiple_Complex |
| TC0600011732.hg.1 | 6.68  | 6.25  | 1.34  | 0.0012 | 0.0308 | SAYSD1           | SAYSVFN motif domain containing 1                       | Multiple_Complex |
| TC1500008978.hg.1 | 9.51  | 9.12  | 1.31  | 0.0012 | 0.0308 | EMC7             | ER membrane protein complex subunit 7                   | Multiple_Complex |
| TC0400012916.hg.1 | 7.24  | 6.7   | 1.45  | 0.0012 | 0.031  | ARAP2            | ArfGAP with RhoGAP domain, ankyrin repeat and PH        | NonCoding        |
| TC0300012281.hg.1 | 10.22 | 11.09 | -1.83 | 0.0012 | 0.031  | ZXDC             | ZXD family zinc finger C                                | Multiple_Complex |
| TC0400008106.hg.1 | 10.64 | 8.3   | 5.07  | 0.0012 | 0.031  | HERC5            | HECT and RLD domain containing E3 ubiquitin protei      | Multiple_Complex |
| TC2200009271.hg.1 | 14.46 | 13.73 | 1.66  | 0.0012 | 0.0313 | APOBEC3C         | apolipoprotein B mRNA editing enzyme, catalytic pol     | Multiple_Complex |
| TC0300010209.hg.1 | 9.71  | 9.15  | 1.48  | 0.0012 | 0.0313 | TADA3            | transcriptional adaptor 3                               | Multiple_Complex |
| TC0200008663.hg.1 | 9.51  | 11.54 | -4.06 | 0.0012 | 0.0313 | IL1R2            | interleukin 1 receptor, type II                         | Multiple_Complex |
| TC1400010261.hg.1 | 3.53  | 4.06  | -1.44 | 0.0012 | 0.0314 | MOK              | MOK protein kinase                                      | Multiple_Complex |
| TC0300011324.hg.1 | 5.17  | 5.9   | -1.66 | 0.0012 | 0.0319 | FHIT             | fragile histidine triad                                 | Multiple_Complex |
| TC1200008568.hg.1 | 10.47 | 9.96  | 1.42  | 0.0012 | 0.0319 | TMPO             | thymopoietin                                            | Multiple_Complex |
| TC0600013272.hg.1 | 9.62  | 10.46 | -1.79 | 0.0012 | 0.0319 | BCLAF1           | BCL2-associated transcription factor 1                  | Multiple_Complex |
| TC1900007836.hg.1 | 5.07  | 5.58  | -1.43 | 0.0012 | 0.032  | FXYD3; MIR6887   | FXYD domain containing ion transport regulator 3; m     | Multiple_Complex |
| TC0100015921.hg.1 | 10.68 | 9.63  | 2.07  | 0.0012 | 0.032  | ADAR             | adenosine deaminase, RNA-specific                       | Multiple_Complex |
| TC0100016051.hg.1 | 5.92  | 6.56  | -1.56 | 0.0012 | 0.032  | FCRL2            | Fc receptor-like 2                                      | Multiple_Complex |
| TC1200010839.hg.1 | 10.58 | 11.51 | -1.91 | 0.0012 | 0.0322 | ITGA5            | integrin alpha 5                                        | Multiple_Complex |
| TC0800012202.hg.1 | 8.05  | 7.51  | 1.46  | 0.0012 | 0.0322 | BOP1; MIR7112    | block of proliferation 1; microRNA 7112                 | Multiple_Complex |
| TC1100010091.hg.1 | 6.37  | 6.83  | -1.37 | 0.0013 | 0.0323 | MRV1             | murine retrovirus integration site 1 homolog            | Multiple_Complex |
| TC1700011313.hg.1 | 9.23  | 10.04 | -1.76 | 0.0013 | 0.0324 | USP32            | ubiquitin specific peptidase 32                         | Multiple_Complex |
| TC1900010789.hg.1 | 7.63  | 8.38  | -1.68 | 0.0013 | 0.0324 | POU2F2           | POU class 2 homeobox 2                                  | Multiple_Complex |
| TC0X00011318.hg.1 | 5.99  | 5.57  | 1.34  | 0.0013 | 0.0328 | TMSB15B          | thymosin beta 15B                                       | NonCoding        |
| TC0700010564.hg.1 | 5.23  | 4.52  | 1.63  | 0.0013 | 0.0328 | HOXA10; HOXA9;   | homeobox A10; homeobox A9; microRNA 196b                | Multiple_Complex |
| TC0800012212.hg.1 | 8.39  | 8.97  | -1.49 | 0.0013 | 0.0328 | SLC39A4          | solute carrier family 39 (zinc transporter), member 4   | Multiple_Complex |
| TC0200012382.hg.1 | 6.65  | 7.25  | -1.52 | 0.0013 | 0.0328 | OXER1            | oxoeicosanoid (OXE) receptor 1                          | Coding           |
| TC0100009760.hg.1 | 13.13 | 13.97 | -1.8  | 0.0013 | 0.0329 | NUDT4P1; NUDT4;  | nudix hydrolase 4 pseudogene 1; nudix hydrolase 4 p     | Multiple_Complex |
| TC0100009833.hg.1 | 13.13 | 13.97 | -1.8  | 0.0013 | 0.0329 | NUDT4; NUDT4P;   | nudix hydrolase 4; nudix hydrolase 4 pseudogene 1       | Multiple_Complex |
| TC0100009877.hg.1 | 6.79  | 6.2   | 1.5   | 0.0013 | 0.0329 | HIST2H3A         | histone cluster 2, H3a                                  | Coding           |
| TC0700009411.hg.1 | 9.01  | 10.82 | -3.52 | 0.0013 | 0.0329 | MGAM2            | maltase-glucoamylase 2 (putative)                       | Multiple_Complex |
| TC1700006709.hg.1 | 9.77  | 7.75  | 4.05  | 0.0013 | 0.033  | XAF1             | XIAP associated factor 1                                | Multiple_Complex |
| TC1900010008.hg.1 | 7.48  | 8.07  | -1.51 | 0.0013 | 0.033  | KIAA1683         | KIAA1683                                                | Multiple_Complex |
| TC0200012257.hg.1 | 13.35 | 11.46 | 3.71  | 0.0013 | 0.033  | EIF2AK2          | eukaryotic translation initiation factor 2-alpha kinase | Multiple_Complex |
| TC1100011339.hg.1 | 6.06  | 5.67  | 1.31  | 0.0013 | 0.033  | CABP2            | calcium binding protein 2                               | Coding           |
| TC0500008921.hg.1 | 11.68 | 11.05 | 1.54  | 0.0013 | 0.0331 | NDFIP1           | Nedd4 family interacting protein 1                      | Multiple_Complex |
| TC1700011731.hg.1 | 8.28  | 7.72  | 1.47  | 0.0013 | 0.0331 | ATP5H            | ATP synthase, H+ transporting, mitochondrial Fo com     | Multiple_Complex |
| TC2000007686.hg.1 | 11.42 | 12.7  | -2.43 | 0.0013 | 0.0331 | LINC01272        | long intergenic non-protein coding RNA 1272             | Multiple_Complex |
| TC0800012087.hg.1 | 5.88  | 6.52  | -1.56 | 0.0013 | 0.0331 | LYNX1            | Ly6/neurotoxin 1                                        | Multiple_Complex |
| TC0600007265.hg.1 | 4.5   | 3.87  | 1.54  | 0.0013 | 0.0331 | HIST1H3C         | histone cluster 1, H3c                                  | Coding           |
| TC0800010894.hg.1 | 4.21  | 4.78  | -1.48 | 0.0013 | 0.0331 | HEY1             | hes-related family bHLH transcription factor with YRF   | Multiple_Complex |
| TC0100006806.hg.1 | 10.53 | 11.41 | -1.84 | 0.0013 | 0.0332 | UBE4B            | ubiquitination factor E4B                               | Multiple_Complex |
| TC0700013428.hg.1 | 11.63 | 12.63 | -2.01 | 0.0013 | 0.0332 | PILRB; STAG3L5P; | paired immunoglobulin-like type 2 receptor beta; stror  | Multiple_Complex |
| TC0300012728.hg.1 | 13.03 | 10.98 | 4.14  | 0.0013 | 0.0335 | PLSCR1           | phospholipid scramblase 1                               | Multiple_Complex |
| TC0700012996.hg.1 | 7.84  | 8.49  | -1.57 | 0.0014 | 0.0339 | ZNF746           | zinc finger protein 746                                 | Multiple_Complex |
| TC1600007130.hg.1 | 3.54  | 3.85  | -1.24 | 0.0014 | 0.0339 | ACSM5            | acyl-CoA synthetase medium-chain family member 5        | Multiple_Complex |
| TC1900008906.hg.1 | 6.06  | 5.77  | 1.22  | 0.0014 | 0.034  | TMEM190          | transmembrane protein 190                               | Coding           |

|                   |       |       |       |        |                                 |                                                                     |                  |
|-------------------|-------|-------|-------|--------|---------------------------------|---------------------------------------------------------------------|------------------|
| TC0600012777.hg.1 | 10.08 | 10.76 | -1.61 | 0.0014 | 0.0343 SNX3                     | sorting nexin 3                                                     | Multiple_Complex |
| TC0100008897.hg.1 | 4.5   | 4     | 1.41  | 0.0014 | 0.0343 WDR63                    | WD repeat domain 63                                                 | Multiple_Complex |
| TC0300012897.hg.1 | 11.5  | 11.02 | 1.4   | 0.0014 | 0.0343 SSR3                     | signal sequence receptor, gamma (translocon-associated)             | Multiple_Complex |
| TC1500007072.hg.1 | 11.83 | 11.4  | 1.35  | 0.0014 | 0.0343 PDIA3                    | protein disulfide isomerase family A member 3                       | Multiple_Complex |
| TC1100011113.hg.1 | 3.87  | 3.46  | 1.33  | 0.0014 | 0.0344 SLC22A8                  | solute carrier family 22 (organic anion transporter), member 8      | Multiple_Complex |
| TC1500008983.hg.1 | 12.53 | 13.13 | -1.51 | 0.0014 | 0.0345 SLC12A6                  | solute carrier family 12 (potassium/chloride transporter), member 6 | Multiple_Complex |
| TC1200010023.hg.1 | 9.71  | 10.36 | -1.56 | 0.0014 | 0.0345 ERP27                    | endoplasmic reticulum protein 27                                    | Multiple_Complex |
| TC1700007536.hg.1 | 4.76  | 4.39  | 1.29  | 0.0014 | 0.0345 SPACA3                   | sperm acrosome associated 3                                         | Multiple_Complex |
| TSUnmapped000004  | 5.51  | 5.21  | 1.23  | 0.0014 | 0.0345 HMBS                     | hydroxymethylbilane synthase                                        | Coding           |
| TC0800012180.hg.1 | 6.05  | 5.49  | 1.47  | 0.0014 | 0.0346 PARP10                   | poly(ADP-ribose) polymerase family member 10                        | Multiple_Complex |
| TC0600011134.hg.1 | 8.55  | 7.75  | 1.73  | 0.0014 | 0.0347 HIST1H4D                 | histone cluster 1, H4d                                              | Coding           |
| TC0900008842.hg.1 | 4.27  | 4.79  | -1.43 | 0.0014 | 0.0347 SLC25A25                 | Zhang2013 ALT_ACCEPTOR, ALT_DONOR, coding, INTRON                   | NonCoding        |
| TC0X00010155.hg.1 | 9.32  | 8.55  | 1.7   | 0.0014 | 0.0347 ITM2A                    | integral membrane protein 2A                                        | Multiple_Complex |
| TC0700007352.hg.1 | 7.1   | 6.43  | 1.59  | 0.0014 | 0.0347 BLVRA                    | biliverdin reductase A                                              | Multiple_Complex |
| TC1700007779.hg.1 | 11.02 | 12.22 | -2.3  | 0.0014 | 0.0348 MSL1                     | male-specific lethal 1 homolog (Drosophila)                         | Multiple_Complex |
| TC0100010230.hg.1 | 6.83  | 7.36  | -1.45 | 0.0014 | 0.0348 CD1C                     | CD1c molecule                                                       | Multiple_Complex |
| TC0200014738.hg.1 | 8.76  | 9.53  | -1.71 | 0.0014 | 0.0348 RBMS1                    | Memczak2013 ALT_ACCEPTOR, ALT_DONOR, coding, INTRON                 | NonCoding        |
| TC1600010656.hg.1 | 4.37  | 3.93  | 1.35  | 0.0014 | 0.035 CENPT                     | centromere protein T                                                | Multiple_Complex |
| TC1100007006.hg.1 | 5.5   | 5.9   | -1.32 | 0.0014 | 0.0351 LDHAL6A                  | lactate dehydrogenase A-like 6A                                     | Coding           |
| TC1500010658.hg.1 | 7.07  | 6.42  | 1.57  | 0.0014 | 0.0351 VIMP                     | VCP-interacting membrane selenoprotein                              | Multiple_Complex |
| TC1200012080.hg.1 | 7.66  | 9.04  | -2.61 | 0.0014 | 0.0351 TESC                     | tescalcin                                                           | Multiple_Complex |
| TC0600013409.hg.1 | 8.21  | 8.99  | -1.71 | 0.0015 | 0.0355 HIVEP2                   | human immunodeficiency virus type I enhancer binding protein 2      | Multiple_Complex |
| TC1400006552.hg.1 | 4.75  | 5.05  | -1.24 | 0.0015 | 0.0355 RP11-998D10.7; F         | Transcript Identified by AceView, Entrez Gene ID(s) 5               | NonCoding        |
| TC1100010175.hg.1 | 7.96  | 7.41  | 1.47  | 0.0015 | 0.0355 RRAS2                    | related RAS viral (r-ras) oncogene homolog 2                        | Multiple_Complex |
| TC0500008782.hg.1 | 10.59 | 11.36 | -1.7  | 0.0015 | 0.0356 KDM3B                    | lysine (K)-specific demethylase 3B                                  | Multiple_Complex |
| TC0300013763.hg.1 | 9.79  | 9.21  | 1.49  | 0.0015 | 0.0357 RUBCN; MIR922            | RUN domain and cysteine-rich domain containing, BCL2L1              | Multiple_Complex |
| TC1200012723.hg.1 | 5.73  | 6.17  | -1.35 | 0.0015 | 0.0357 ZNF664                   | zinc finger protein 664                                             | Multiple_Complex |
| TC1300008342.hg.1 | 8.73  | 8.07  | 1.59  | 0.0015 | 0.0357 C1QTNF9B                 | C1q and tumor necrosis factor related protein 9B                    | Multiple_Complex |
| TC1000008891.hg.1 | 7.18  | 6.5   | 1.6   | 0.0015 | 0.0357 DUSP5                    | dual specificity phosphatase 5                                      | Multiple_Complex |
| TC0300012029.hg.1 | 12.53 | 12.18 | 1.27  | 0.0015 | 0.0358 NAA50                    | N(alpha)-acetyltransferase 50, NatE catalytic subunit               | Multiple_Complex |
| TC0400009322.hg.1 | 8.51  | 9.21  | -1.62 | 0.0015 | 0.036 GALNT7                    | polypeptide N-acetylgalactosaminyltransferase 7                     | Multiple_Complex |
| TC1100013003.hg.1 | 10.03 | 9.39  | 1.56  | 0.0015 | 0.0361 TMX2; C11orf31           | thioredoxin-related transmembrane protein 2; chromosome 11          | Multiple_Complex |
| TC0300011175.hg.1 | 8.55  | 8.25  | 1.24  | 0.0015 | 0.0362 PBRM1                    | polybromo 1                                                         | Multiple_Complex |
| TC0900012202.hg.1 | 10.01 | 10.42 | -1.32 | 0.0015 | 0.0363 KIAA2026                 | KIAA2026                                                            | Multiple_Complex |
| TSUnmapped000007C | 7.28  | 6.85  | 1.35  | 0.0015 | 0.0364 HYOU1                    | hypoxia up-regulated 1                                              | NonCoding        |
| TC0700011194.hg.1 | 3.36  | 3.74  | -1.3  | 0.0015 | 0.0365 LOC401357; RP13-113D10.1 | uncharacterized LOC401357; novel piRNA host transcript              | NonCoding        |
| TC1700012322.hg.1 | 4.09  | 3.58  | 1.43  | 0.0015 | 0.0365 GLOD4                    | glyoxalase domain containing 4                                      | Multiple_Complex |
| TC1900009959.hg.1 | 5.9   | 5.56  | 1.27  | 0.0015 | 0.0365 ABHD8                    | abhydrolase domain containing 8                                     | Multiple_Complex |
| TC0200015815.hg.1 | 6.23  | 7.18  | -1.93 | 0.0015 | 0.0365 EPHA4                    | EPH receptor A4                                                     | Multiple_Complex |
| TC0100014562.hg.1 | 7.4   | 6.96  | 1.36  | 0.0015 | 0.0365 LRRC40                   | leucine rich repeat containing 40                                   | Multiple_Complex |
| TC0800012086.hg.1 | 4.9   | 5.49  | -1.5  | 0.0015 | 0.0367 LYPD2                    | LY6/PLAUR domain containing 2                                       | Coding           |
| TC0300013636.hg.1 | 6.88  | 7.66  | -1.71 | 0.0015 | 0.0367 ACAP2; ACAP2-IT          | Transcript Identified by AceView, Entrez Gene ID(s) 2               | NonCoding        |
| TC2200009107.hg.1 | 3.47  | 3.85  | -1.3  | 0.0015 | 0.0367 C22orf34                 | chromosome 22 open reading frame 34                                 | Multiple_Complex |
| TC1500010422.hg.1 | 9.3   | 8.89  | 1.33  | 0.0016 | 0.037 IDH2                      | isocitrate dehydrogenase 2 (NADP+), mitochondrial                   | Multiple_Complex |
| TC0600011136.hg.1 | 6.39  | 5.48  | 1.87  | 0.0016 | 0.037 HIST1H2BG                 | histone cluster 1, H2bg                                             | Multiple_Complex |
| TC1900009651.hg.1 | 5.28  | 5.86  | -1.49 | 0.0016 | 0.0371 YIPF2                    | Yip1 domain family member 2                                         | Multiple_Complex |
| TC0600007869.hg.1 | 7.6   | 7.05  | 1.47  | 0.0016 | 0.0371 CMTR1                    | cap methyltransferase 1                                             | Multiple_Complex |
| TC1700007790.hg.1 | 5.4   | 4.88  | 1.44  | 0.0016 | 0.0371 CDC6                     | cell division cycle 6                                               | Multiple_Complex |
| TC0600009059.hg.1 | 11.11 | 12.08 | -1.97 | 0.0016 | 0.0372 FOXO3                    | forkhead box O3                                                     | Multiple_Complex |
| TC1600011358.hg.1 | 4.89  | 4.34  | 1.47  | 0.0016 | 0.0372 C16orf45                 | chromosome 16 open reading frame 45                                 | Multiple_Complex |
| TC0500008691.hg.1 | 11.63 | 12.06 | -1.35 | 0.0016 | 0.0373 UBE2B                    | ubiquitin conjugating enzyme E2B                                    | Multiple_Complex |
| TC1000009172.hg.1 | 11    | 10.39 | 1.53  | 0.0016 | 0.0373 BUB3                     | BUB3 mitotic checkpoint protein                                     | Multiple_Complex |
| TC0X00009128.hg.1 | 3.57  | 3.99  | -1.34 | 0.0016 | 0.0374 ACE2                     | angiotensin I converting enzyme 2                                   | Multiple_Complex |
| TC0800012277.hg.1 | 4.14  | 4.56  | -1.34 | 0.0016 | 0.0375 SFTPC                    | surfactant protein C                                                | Multiple_Complex |
| TC0200013600.hg.1 | 6.62  | 6.02  | 1.52  | 0.0016 | 0.0375 KIAA1211L                | KIAA1211-like                                                       | Multiple_Complex |
| TC1300008080.hg.1 | 6.8   | 6.32  | 1.4   | 0.0016 | 0.0375 TUBGCP3                  | Memczak2013 ANTISENSE, coding, INTERNAL, intron1                    | NonCoding        |
| TC1100010268.hg.1 | 9.38  | 9.91  | -1.45 | 0.0016 | 0.0375 TSG101                   | tumor susceptibility 101                                            | Multiple_Complex |
| TC0100010017.hg.1 | 5.79  | 6.16  | -1.3  | 0.0016 | 0.0375 SPRR1A                   | small proline-rich protein 1A                                       | Multiple_Complex |
| TC0X00008731.hg.1 | 8.72  | 8.28  | 1.35  | 0.0016 | 0.0375 VMA21                    | VMA21 vacuolar H+-ATPase homolog (S. cerevisiae)                    | Multiple_Complex |
| TC0500007666.hg.1 | 6.41  | 5.68  | 1.67  | 0.0016 | 0.0379 CENPH                    | centromere protein H                                                | Multiple_Complex |
| TC1000009404.hg.1 | 6.56  | 6.19  | 1.29  | 0.0016 | 0.0382 PWWP2B                   | PWWP domain containing 2B                                           | Coding           |
| TC0300009728.hg.1 | 5.09  | 5.87  | -1.72 | 0.0016 | 0.0382 VPS8                     | Transcript Identified by AceView, Entrez Gene ID(s) 2               | Unassigned       |
| TC1500008245.hg.1 | 13.75 | 14.44 | -1.61 | 0.0016 | 0.0382 ABHD2                    | abhydrolase domain containing 2                                     | Multiple_Complex |
| TC0X00011214.hg.1 | 6.21  | 5.81  | 1.32  | 0.0016 | 0.0383 CTAG1B                   | cancer/testis antigen 1B                                            | Multiple_Complex |
| TC0200015211.hg.1 | 9.67  | 10.6  | -1.9  | 0.0016 | 0.0383 SLC40A1                  | solute carrier family 40 (iron-regulated transporter), member 1     | Multiple_Complex |
| TC1900008358.hg.1 | 6.67  | 6.14  | 1.44  | 0.0017 | 0.0383 CCDC61                   | coiled-coil domain containing 61                                    | Multiple_Complex |
| TC1500007238.hg.1 | 7.41  | 8.06  | -1.57 | 0.0017 | 0.0383 TMOD2                    | tropomodulin 2 (neuronal)                                           | Multiple_Complex |
| TC0900010886.hg.1 | 9.08  | 8.49  | 1.51  | 0.0017 | 0.0383 PTCH1                    | patched 1                                                           | Multiple_Complex |
| TC0800011064.hg.1 | 5.77  | 5.14  | 1.55  | 0.0017 | 0.0383 CALB1                    | calbindin 1                                                         | Multiple_Complex |
| TC1900011841.hg.1 | 5.75  | 5.13  | 1.53  | 0.0017 | 0.0383 LMNB2; MIR7108           | lamin B2; microRNA 7108                                             | Multiple_Complex |
| TC1500010778.hg.1 | 10.79 | 11.55 | -1.69 | 0.0017 | 0.0383 IL16                     | interleukin 16                                                      | Multiple_Complex |
| TC0X00009549.hg.1 | 7.95  | 7.42  | 1.45  | 0.0017 | 0.0383 NDUFB11                  | NADH dehydrogenase (ubiquinone) 1 beta subcomplex 11                | Multiple_Complex |

|                   |       |       |       |        |                      |                                                                |                  |
|-------------------|-------|-------|-------|--------|----------------------|----------------------------------------------------------------|------------------|
| TC1100006812.hg.1 | 9.7   | 10.18 | -1.39 | 0.0017 | 0.0384 ZNF143        | zinc finger protein 143                                        | Multiple_Complex |
| TC0100011242.hg.1 | 8     | 8.57  | -1.49 | 0.0017 | 0.0384 TMEM183A      | transmembrane protein 183A                                     | Multiple_Complex |
| TC0300009632.hg.1 | 4.85  | 4.51  | 1.27  | 0.0017 | 0.0387 SOX2          | SRY box 2                                                      | Coding           |
| TC0600007287.hg.1 | 5.39  | 4.81  | 1.5   | 0.0017 | 0.0387 HIST1H3E      | histone cluster 1, H3e                                         | Coding           |
| TC0600012542.hg.1 | 12.72 | 12.06 | 1.57  | 0.0017 | 0.0387 UBE2J1        | ubiquitin-conjugating enzyme E2, J1                            | Multiple_Complex |
| TC1200012700.hg.1 | 9.28  | 8.39  | 1.85  | 0.0017 | 0.0387 C12orf75      | chromosome 12 open reading frame 75                            | Multiple_Complex |
| TC1200010201.hg.1 | 8.23  | 7.72  | 1.43  | 0.0017 | 0.0388 TM7SF3        | transmembrane 7 superfamily member 3                           | Multiple_Complex |
| TC0800012351.hg.1 | 7.9   | 7.39  | 1.42  | 0.0017 | 0.0389 WDYHV1        | WDYHV motif containing 1                                       | Multiple_Complex |
| TC0100012889.hg.1 | 6.99  | 6.62  | 1.29  | 0.0017 | 0.0389 MAD2L2        | MAD2 mitotic arrest deficient-like 2 (yeast)                   | Multiple_Complex |
| TC0400006987.hg.1 | 12.72 | 11.07 | 3.14  | 0.0017 | 0.0394 LAP3          | leucine aminopeptidase 3                                       | Multiple_Complex |
| TC1200007833.hg.1 | 6.45  | 6.18  | 1.2   | 0.0017 | 0.0394 SLC39A5       | solute carrier family 39 (zinc transporter), member 5          | Multiple_Complex |
| TC0900009944.hg.1 | 7.7   | 8.35  | -1.57 | 0.0017 | 0.0394 CD72          | CD72 molecule                                                  | Multiple_Complex |
| TC0200016661.hg.1 | 3.82  | 4.29  | -1.39 | 0.0017 | 0.0394 C2orf61       | chromosome 2 open reading frame 61                             | Multiple_Complex |
| TC0500008307.hg.1 | 3.34  | 3.77  | -1.35 | 0.0017 | 0.0394 TSLP          | thymic stromal lymphopoietin                                   | Multiple_Complex |
| TC1800008824.hg.1 | 11.18 | 10.7  | 1.4   | 0.0017 | 0.0394 LMAN1         | lectin, mannose-binding, 1                                     | Multiple_Complex |
| TC0X00007540.hg.1 | 5.74  | 5.26  | 1.4   | 0.0017 | 0.0395 DLG3          | discs, large homolog 3 (Drosophila)                            | Multiple_Complex |
| TC0700008659.hg.1 | 6.06  | 6.62  | -1.48 | 0.0017 | 0.0395 NFE4          | nuclear factor, erythroid 4                                    | Multiple_Complex |
| TC1600010500.hg.1 | 7.11  | 6.56  | 1.47  | 0.0017 | 0.0395 GOT2          | glutamic-oxaloacetic transaminase 2, mitochondrial             | Multiple_Complex |
| TC1600006488.hg.1 | 7.2   | 6.76  | 1.35  | 0.0018 | 0.0396 STUB1         | STIP1 homology and U-box containing protein 1, E3 ubiq         | Multiple_Complex |
| TC1100009191.hg.1 | 12.7  | 12.13 | 1.48  | 0.0018 | 0.0397 IL10RA        | interleukin 10 receptor, alpha                                 | Multiple_Complex |
| TC1600008568.hg.1 | 9.69  | 9.36  | 1.26  | 0.0018 | 0.0397 ATMIN         | ATM interactor                                                 | Multiple_Complex |
| TC1700010738.hg.1 | 9.45  | 9.95  | -1.42 | 0.0018 | 0.0397 EZH1          | enhancer of zeste 1 polycomb repressive complex 2 subunit 1    | Multiple_Complex |
| TC0100008080.hg.1 | 8.05  | 7.71  | 1.27  | 0.0018 | 0.0397 DPH2          | DPH2 homolog                                                   | Multiple_Complex |
| TC1100009685.hg.1 | 5.63  | 4.89  | 1.67  | 0.0018 | 0.0398 IRF7          | interferon regulatory factor 7                                 | Multiple_Complex |
| TC0300007387.hg.1 | 8.53  | 9.45  | -1.9  | 0.0018 | 0.0398 RNF123        | ring finger protein 123                                        | Multiple_Complex |
| TC1500010050.hg.1 | 9.47  | 8.88  | 1.51  | 0.0018 | 0.0399 COX5A         | cytochrome c oxidase subunit Va                                | Multiple_Complex |
| TC0700010947.hg.1 | 7.68  | 7.05  | 1.54  | 0.0018 | 0.04 TBRG4; SNORAS5  | transforming growth factor beta regulator 4; small nuclear RNA | Multiple_Complex |
| TC1200010450.hg.1 | 8.7   | 8.32  | 1.3   | 0.0018 | 0.04 YAF2            | YY1 associated factor 2                                        | Multiple_Complex |
| TC0100017716.hg.1 | 3.64  | 3.27  | 1.29  | 0.0018 | 0.04 FAM89A; MIR118  | family with sequence similarity 89, member A; microRNA         | Multiple_Complex |
| TC1600011399.hg.1 | 12.35 | 10.62 | 3.33  | 0.0018 | 0.04 MT1X            | metallothionein 1X                                             | Multiple_Complex |
| TC1200008255.hg.1 | 6.51  | 7.17  | -1.59 | 0.0018 | 0.04 ZDHC17          | zinc finger, DHHC-type containing 17                           | Multiple_Complex |
| TC0400006538.hg.1 | 7.56  | 8.16  | -1.52 | 0.0018 | 0.0403 TACC3         | transforming, acidic coiled-coil containing protein 3          | Multiple_Complex |
| TC1100007826.hg.1 | 6.68  | 7.32  | -1.56 | 0.0018 | 0.0403 BEST1         | bestrophin 1                                                   | Multiple_Complex |
| TC0800007949.hg.1 | 10.06 | 9.54  | 1.43  | 0.0018 | 0.0403 TERF1         | telomeric repeat binding factor (NIMA-interacting) 1           | Multiple_Complex |
| TC1400007595.hg.1 | 7.31  | 8.3   | -1.98 | 0.0018 | 0.0403 SIPA1L1       | signal-induced proliferation-associated 1 like 1               | Multiple_Complex |
| TC1900011542.hg.1 | 6.16  | 5.75  | 1.33  | 0.0018 | 0.0405 PEG3; ZIM2    | paternally expressed 3; zinc finger, imprinted 2               | Multiple_Complex |
| TC0200012339.hg.1 | 7.32  | 8.19  | -1.83 | 0.0018 | 0.0405 SLC8A1        | solute carrier family 8 (sodium/calcium exchanger), member 1   | Multiple_Complex |
| TSUnmapped0000000 | 3.99  | 4.61  | -1.54 | 0.0018 | 0.0405 HMBS          | hydroxymethylbilane synthase                                   | Coding           |
| TC1800009228.hg.1 | 6.13  | 5.72  | 1.33  | 0.0018 | 0.0405 ELAC1         | elaC ribonuclease Z 1                                          | Multiple_Complex |
| TC0900008091.hg.1 | 7.66  | 8.23  | -1.49 | 0.0018 | 0.0405 ERCC6L2       | excision repair cross-complementation group 6-like 2           | Multiple_Complex |
| TC1400008415.hg.1 | 6.02  | 6.63  | -1.52 | 0.0018 | 0.0405 ZFYVE21       | zinc finger, FYVE domain containing 21                         | Multiple_Complex |
| TC0700009499.hg.1 | 4.48  | 5.75  | -2.41 | 0.0018 | 0.0405 TAS2R60       | taste receptor, type 2, member 60                              | Coding           |
| TC1100009449.hg.1 | 6.7   | 7.07  | -1.29 | 0.0018 | 0.0405 TIRAP         | toll-interleukin 1 receptor (TIR) domain containing adaptor    | Multiple_Complex |
| TC0100009064.hg.1 | 4.59  | 5.29  | -1.63 | 0.0018 | 0.0406 FNBP1L        | formin binding protein 1-like                                  | Multiple_Complex |
| TC1700010221.hg.1 | 6.98  | 8.09  | -2.15 | 0.0018 | 0.0406 DHR513        | dehydrogenase/reductase (SDR family) member 13                 | Multiple_Complex |
| TC0600007792.hg.1 | 7.76  | 8.34  | -1.49 | 0.0019 | 0.0407 PPARC         | peroxisome proliferator-activated receptor delta               | Multiple_Complex |
| TC0500012459.hg.1 | 5.5   | 5.01  | 1.4   | 0.0019 | 0.0411 PDGFRB        | platelet-derived growth factor receptor, beta polypeptide      | Multiple_Complex |
| TC0600009228.hg.1 | 8.16  | 8.79  | -1.55 | 0.0019 | 0.0411 NT5DC1        | 5-nucleotidase domain containing 1                             | Multiple_Complex |
| TC0700011575.hg.1 | 8.64  | 9.33  | -1.61 | 0.0019 | 0.0411 POMZP3        | POM121 and ZP3 fusion                                          | Multiple_Complex |
| TC0400007120.hg.1 | 9.21  | 10.22 | -2.03 | 0.0019 | 0.0411 RBPJ          | recombination signal binding protein for immunoglobulin        | Multiple_Complex |
| TC0500013222.hg.1 | 5.86  | 5.4   | 1.37  | 0.0019 | 0.0414 LOC100505841  | zinc finger protein 474-like                                   | Multiple_Complex |
| TC1900011770.hg.1 | 14.11 | 15.1  | -1.98 | 0.0019 | 0.0414 C5AR1         | complement component 5a receptor 1                             | Multiple_Complex |
| TC100009997.hg.1  | 4.36  | 4.03  | 1.26  | 0.0019 | 0.0414 CASC10        | cancer susceptibility candidate 10                             | Multiple_Complex |
| TC1800006715.hg.1 | 7.79  | 8.48  | -1.62 | 0.0019 | 0.0415 IMPA2         | inositol(myo)-1(or 4)-monophosphatase 2                        | Multiple_Complex |
| TC0100008631.hg.1 | 4.69  | 5.57  | -1.84 | 0.0019 | 0.0415 SGIP1         | SH3-domain GRB2-like (endophilin) interacting protein          | Multiple_Complex |
| TC1500008545.hg.1 | 8.38  | 9.01  | -1.55 | 0.0019 | 0.0416 ASB7          | ankyrin repeat and SOCS box containing 7                       | Multiple_Complex |
| TC0200013616.hg.1 | 8.23  | 9.25  | -2.02 | 0.0019 | 0.0416 AFF3          | AF4/FMR2 family, member 3                                      | Multiple_Complex |
| TC0800010138.hg.1 | 11.51 | 12.48 | -1.95 | 0.0019 | 0.0416 RAB11FIP1     | RAB11 family interacting protein 1 (class I)                   | Multiple_Complex |
| TC1400009697.hg.1 | 10.36 | 9.63  | 1.66  | 0.0019 | 0.0416 NPC2; MIR4709 | Niemann-Pick disease, type C2; microRNA 4709                   | Multiple_Complex |
| TC1300007780.hg.1 | 8.51  | 8.09  | 1.34  | 0.0019 | 0.0416 RAP2A         | RAP2A, member of RAS oncogene family                           | Coding           |
| TC1900007809.hg.1 | 9.81  | 9.32  | 1.41  | 0.0019 | 0.0417 UBA2          | ubiquitin-like modifier activating enzyme 2                    | Multiple_Complex |
| TC0600012289.hg.1 | 3.81  | 4.15  | -1.26 | 0.0019 | 0.0417 OOE           | oocyte expressed protein                                       | Coding           |
| TC0500008830.hg.1 | 12.55 | 12.12 | 1.34  | 0.0019 | 0.0418 UBE2D2        | ubiquitin conjugating enzyme E2D 2                             | Multiple_Complex |
| TC2100008098.hg.1 | 9.05  | 8.68  | 1.29  | 0.0019 | 0.042 DSCR3          | Down syndrome critical region 3                                | Multiple_Complex |
| TC1700011922.hg.1 | 8.21  | 7.75  | 1.38  | 0.002  | 0.0421 LGALS3BP      | lectin, galactoside-binding, soluble, 3 binding protein        | Multiple_Complex |
| TC1900009550.hg.1 | 5     | 4.75  | 1.19  | 0.002  | 0.0422 ADAMTS10      | ADAM metalloproteinase with thrombospondin type 1 motifs       | Multiple_Complex |
| TC1100010762.hg.1 | 8.18  | 7.65  | 1.45  | 0.002  | 0.0422 NUP160        | nucleoporin 160kDa                                             | Multiple_Complex |
| TC0200007739.hg.1 | 5.4   | 4.79  | 1.53  | 0.002  | 0.0425 COMMD1        | copper metabolism (Murr1) domain containing 1                  | Multiple_Complex |
| TC1100011520.hg.1 | 6.84  | 7.24  | -1.32 | 0.002  | 0.0425 KRTAP5-11     | keratin associated protein 5-11                                | Multiple_Complex |
| TC1500008052.hg.1 | 8.9   | 8.5   | 1.32  | 0.002  | 0.0425 MESDC1        | mesoderm development candidate 1                               | Coding           |
| TC2000009267.hg.1 | 9.79  | 10.25 | -1.38 | 0.002  | 0.0425 SLC35C2       | solute carrier family 35 (GDP-fucose transporter), member 2    | Multiple_Complex |
| TC0200009189.hg.1 | 13.77 | 15.18 | -2.66 | 0.002  | 0.0425 GYPC          | glycophorin C (Gerbich blood group)                            | Multiple_Complex |

|                   |       |       |       |        |        |                                                                        |                  |
|-------------------|-------|-------|-------|--------|--------|------------------------------------------------------------------------|------------------|
| TC1200012636.hg.1 | 17.58 | 18.5  | -1.89 | 0.002  | 0.0425 | PCBP2; PCBP2-OT poly(rC) binding protein 2; PCBP2 overlapping transcr  | Multiple_Complex |
| TC0400012828.hg.1 | 8.3   | 9.2   | -1.86 | 0.002  | 0.0425 | BANK1 B-cell scaffold protein with ankyrin repeats 1                   | Multiple_Complex |
| TC2200009273.hg.1 | 9.81  | 9.21  | 1.52  | 0.002  | 0.0426 | APOBEC3F apolipoprotein B mRNA editing enzyme, catalytic pol           | Multiple_Complex |
| TC0100008536.hg.1 | 6.71  | 7.55  | -1.79 | 0.002  | 0.0426 | INADL InaD-like (Drosophila)                                           | Multiple_Complex |
| TC1100006547.hg.1 | 4.5   | 4.2   | 1.23  | 0.002  | 0.0426 | MRPL23 mitochondrial ribosomal protein L23                             | Multiple_Complex |
| TC1200008134.hg.1 | 6.71  | 6.12  | 1.51  | 0.002  | 0.0426 | YEATS4 YEATS domain containing 4                                       | Multiple_Complex |
| TC1200009911.hg.1 | 8.9   | 8.62  | 1.21  | 0.002  | 0.0426 | MAGOHB mago homolog B, exon junction complex core compo                | Multiple_Complex |
| TC1700012377.hg.1 | 3.52  | 3.98  | -1.37 | 0.002  | 0.0428 | LYRM9 LYR motif containing 9                                           | Multiple_Complex |
| TC1900009102.hg.1 | 6.03  | 5.42  | 1.53  | 0.002  | 0.0428 | RNF126 ring finger protein 126                                         | Multiple_Complex |
| TC1700011892.hg.1 | 5.16  | 4.5   | 1.58  | 0.002  | 0.0428 | TK1 thymidine kinase 1, soluble                                        | Multiple_Complex |
| TC0100010078.hg.1 | 11.38 | 12.4  | -2.02 | 0.002  | 0.0429 | IL6R interleukin 6 receptor                                            | Multiple_Complex |
| TC2100008000.hg.1 | 8.56  | 7.98  | 1.5   | 0.002  | 0.0429 | GART phosphoribosylglycinamide formyltransferase, phosph               | Multiple_Complex |
| TC0900012292.hg.1 | 3.85  | 4.2   | -1.27 | 0.002  | 0.043  | LRRC26 leucine rich repeat containing 26                               | Coding           |
| TC1600010756.hg.1 | 5.73  | 6.31  | -1.49 | 0.002  | 0.0431 | ST3GAL2 ST3 beta-galactoside alpha-2,3-sialyltransferase 2             | Multiple_Complex |
| TC1200006450.hg.1 | 10.64 | 11.96 | -2.5  | 0.002  | 0.0431 | WNK1 WNK lysine deficient protein kinase 1                             | Multiple_Complex |
| TC0100010379.hg.1 | 11.58 | 11.08 | 1.42  | 0.002  | 0.0431 | UHMK1 U2AF homology motif (UHM) kinase 1                               | Multiple_Complex |
| TC0500013351.hg.1 | 9.38  | 9.89  | -1.42 | 0.0021 | 0.0431 | FNIP1 folliculin interacting protein 1                                 | Multiple_Complex |
| TC1700007897.hg.1 | 6.61  | 5.93  | 1.6   | 0.0021 | 0.0431 | HSD17B1 hydroxysteroid (17-beta) dehydrogenase 1                       | Multiple_Complex |
| TSUnmapped000000  | 4.57  | 4.13  | 1.36  | 0.0021 | 0.0432 | PSMC4 proteasome 26S subunit, ATPase 4 [Source:HGNC Sy                 | NonCoding        |
| TC1500010908.hg.1 | 9.32  | 8.55  | 1.71  | 0.0021 | 0.0437 | STARD5 STAR-related lipid transfer domain containing 5                 | NonCoding        |
| TC0X00007053.hg.1 | 5.09  | 4.61  | 1.39  | 0.0021 | 0.0437 | MAOA monoamine oxidase A                                               | Multiple_Complex |
| TC0300009289.hg.1 | 3.76  | 4.28  | -1.44 | 0.0021 | 0.0437 | LEKR1 leucine, glutamate and lysine rich 1                             | Multiple_Complex |
| TC0100010155.hg.1 | 12.84 | 14.1  | -2.4  | 0.0021 | 0.0437 | SEMA4A sema domain, immunoglobulin domain (Ig), transme                | Multiple_Complex |
| TC1000009152.hg.1 | 4.31  | 3.6   | 1.64  | 0.0021 | 0.0437 | HTRA1 HtrA serine peptidase 1                                          | Multiple_Complex |
| TC0700009996.hg.1 | 7.04  | 6.63  | 1.33  | 0.0021 | 0.0437 | C7orf50 chromosome 7 open reading frame 50                             | Multiple_Complex |
| TC0800010990.hg.1 | 11.39 | 13.92 | -5.77 | 0.0021 | 0.0438 | CA1 carbonic anhydrase I                                               | Multiple_Complex |
| TC2000007620.hg.1 | 8.62  | 9.25  | -1.54 | 0.0021 | 0.044  | ARFGEF2 ADP-ribosylation factor guanine nucleotide-exchange            | Multiple_Complex |
| TC0100017078.hg.1 | 7.72  | 7.11  | 1.52  | 0.0021 | 0.044  | RAB29 RAB29, member RAS oncogene family                                | Multiple_Complex |
| TC1100011794.hg.1 | 9.82  | 10.46 | -1.56 | 0.0021 | 0.0441 | PRCP prolylcarboxypeptidase                                            | Multiple_Complex |
| TC1100009225.hg.1 | 7.69  | 8.6   | -1.87 | 0.0021 | 0.0441 | CXCR5 chemokine (C-X-C motif) receptor 5                               | Coding           |
| TC1100012474.hg.1 | 7.91  | 8.47  | -1.47 | 0.0021 | 0.0441 | MPZL2 myelin protein zero-like 2                                       | Multiple_Complex |
| TC0300010358.hg.1 | 8.71  | 9.29  | -1.49 | 0.0021 | 0.0442 | XPC xeroderma pigmentosum, complementation group C                     | Multiple_Complex |
| TC0900009996.hg.1 | 7.24  | 7.75  | -1.42 | 0.0021 | 0.0442 | PAX5 paired box 5                                                      | Multiple_Complex |
| TC1700011783.hg.1 | 7.79  | 7.28  | 1.43  | 0.0022 | 0.0446 | SRP68 signal recognition particle 68kDa                                | Multiple_Complex |
| TC1600008657.hg.1 | 10.34 | 9.71  | 1.55  | 0.0022 | 0.0448 | USP10 ubiquitin specific peptidase 10                                  | Multiple_Complex |
| TC1100006896.hg.1 | 5.16  | 5.54  | -1.3  | 0.0022 | 0.0448 | RASSF10 Ras association (RalGDS/AF-6) domain family (N-term            | Coding           |
| TC0100008517.hg.1 | 6.61  | 7.53  | -1.89 | 0.0022 | 0.0452 | NFIA nuclear factor I/A                                                | Multiple_Complex |
| TC0600010066.hg.1 | 10.63 | 11.94 | -2.48 | 0.0022 | 0.0454 | IGF2R insulin-like growth factor 2 receptor                            | Multiple_Complex |
| TC0X00009384.hg.1 | 5.58  | 5.01  | 1.49  | 0.0022 | 0.0454 | DYNLT3 dynein, light chain, Tctex-type 3                               | Coding           |
| TC1700011033.hg.1 | 13.09 | 14.09 | -1.99 | 0.0022 | 0.0455 | PHOSPHO1 phosphatase, orphan 1                                         | Coding           |
| TC2200007101.hg.1 | 9.71  | 9.24  | 1.39  | 0.0022 | 0.0457 | LINC01521 long intergenic non-protein coding RNA 1521                  | NonCoding        |
| TC1300006799.hg.1 | 7.67  | 8.42  | -1.68 | 0.0022 | 0.0457 | FRY FRY microtubule binding protein                                    | Multiple_Complex |
| TC1900008967.hg.1 | 6.56  | 6.22  | 1.27  | 0.0022 | 0.0458 | ZNF470 zinc finger protein 470                                         | Multiple_Complex |
| TC1900009970.hg.1 | 6.39  | 5.51  | 1.84  | 0.0022 | 0.0458 | BST2 bone marrow stromal cell antigen 2                                | Multiple_Complex |
| TC1600009855.hg.1 | 13.21 | 13.8  | -1.5  | 0.0022 | 0.0459 | NPIP6 nuclear pore complex interacting protein family, mer             | Coding           |
| TC0100015764.hg.1 | 7.37  | 7.75  | -1.3  | 0.0022 | 0.046  | FAM63A family with sequence similarity 63, member A                    | Multiple_Complex |
| TC0300008863.hg.1 | 13.71 | 13.25 | 1.37  | 0.0022 | 0.046  | CDV3 CDV3 homolog (mouse)                                              | Multiple_Complex |
| TC0800009735.hg.1 | 7.98  | 7.3   | 1.61  | 0.0023 | 0.046  | MTUS1 microtubule associated tumor suppressor 1                        | Multiple_Complex |
| TC0600007605.hg.1 | 12.78 | 12.16 | 1.53  | 0.0023 | 0.046  | LY6G5B; CSNK2B lymphocyte antigen 6 complex, locus G5B; casein kin     | Multiple_Complex |
| TC1200010931.hg.1 | 12.49 | 11.99 | 1.41  | 0.0023 | 0.046  | PTGES3 prostaglandin E synthase 3 (cytosolic)                          | Multiple_Complex |
| TC1100006659.hg.1 | 4.7   | 5.11  | -1.32 | 0.0023 | 0.0461 | OR52M1 olfactory receptor, family 52, subfamily M, member :            | Coding           |
| TC1100012424.hg.1 | 9.12  | 10.08 | -1.95 | 0.0023 | 0.0461 | SIK3 SIK family kinase 3                                               | Multiple_Complex |
| TC0100013629.hg.1 | 7.36  | 6.97  | 1.3   | 0.0023 | 0.0461 | YARS tyrosyl-tRNA synthetase                                           | Multiple_Complex |
| TC0900010582.hg.1 | 5.84  | 6.68  | -1.79 | 0.0023 | 0.0463 | KIF27 kinesin family member 27                                         | Multiple_Complex |
| TC0900009339.hg.1 | 7.91  | 8.38  | -1.38 | 0.0023 | 0.0464 | WASH1 WAS protein family homolog 1                                     | Multiple_Complex |
| TC1600008190.hg.1 | 8.19  | 8.73  | -1.45 | 0.0023 | 0.0465 | SLC7A6 solute carrier family 7 (amino acid transporter light c         | Multiple_Complex |
| TC1900007619.hg.1 | 6.08  | 5.64  | 1.36  | 0.0023 | 0.0466 | ZNF726; ZNF92P3 zinc finger protein 726; zinc finger protein 92 pseudo | Multiple_Complex |
| TC1200012606.hg.1 | 11.2  | 11.83 | -1.55 | 0.0023 | 0.0468 | LRMP lymphoid-restricted membrane protein                              | Multiple_Complex |
| TC0600011441.hg.1 | 12.32 | 13.07 | -1.68 | 0.0023 | 0.0469 | BAG6 BCL2 associated athanogene 6                                      | Multiple_Complex |
| TC1000010849.hg.1 | 8.72  | 8.95  | -1.17 | 0.0023 | 0.047  | SLC25A16 solute carrier family 25 (mitochondrial carrier), mem         | Multiple_Complex |
| TC0900012076.hg.1 | 6.67  | 6.31  | 1.28  | 0.0023 | 0.047  | ZMYND19 zinc finger, MYND-type containing 19                           | Multiple_Complex |
| TC1600010914.hg.1 | 3.6   | 3.97  | -1.29 | 0.0023 | 0.047  | ADAMTS18 ADAM metalloproteinase with thrombospondin type               | Multiple_Complex |
| TC1200011327.hg.1 | 4.61  | 4.18  | 1.35  | 0.0023 | 0.047  | CSR2P cysteine and glycine-rich protein 2                              | Multiple_Complex |
| TC0600014287.hg.1 | 3.05  | 3.42  | -1.3  | 0.0023 | 0.0471 | MOC51 molybdenum cofactor synthesis 1                                  | Multiple_Complex |
| TC1700012015.hg.1 | 7.26  | 6.88  | 1.3   | 0.0023 | 0.0471 | AATK apoptosis-associated tyrosine kinase                              | Multiple_Complex |
| TC0X00009160.hg.1 | 8.77  | 8.38  | 1.31  | 0.0023 | 0.0471 | RBBP7 retinoblastoma binding protein 7                                 | Multiple_Complex |
| TC1900011445.hg.1 | 6.49  | 6.07  | 1.34  | 0.0024 | 0.0472 | PPP1R12C protein phosphatase 1, regulatory subunit 12C                 | Multiple_Complex |
| TC0600008156.hg.1 | 8.78  | 7.89  | 1.85  | 0.0024 | 0.0473 | ENPP4 ectonucleotide pyrophosphatase/phosphodiesterase                 | Coding           |
| TC0300007445.hg.1 | 3.92  | 4.37  | -1.37 | 0.0024 | 0.0473 | GRM2 glutamate receptor, metabotropic 2                                | Multiple_Complex |
| TC0200016444.hg.1 | 3.6   | 3.92  | -1.25 | 0.0024 | 0.0473 | MSH6 mutS homolog 6                                                    | NonCoding        |
| TC1600006888.hg.1 | 10.34 | 11.06 | -1.64 | 0.0024 | 0.0473 | CIITA class II, major histocompatibility complex, transactiv           | Multiple_Complex |
| TC1700009173.hg.1 | 6.36  | 5.91  | 1.36  | 0.0024 | 0.0474 | BAHCC1 BAH domain and coiled-coil containing 1                         | Multiple_Complex |



|                   |       |       |       |        |                                   |                                                            |                  |
|-------------------|-------|-------|-------|--------|-----------------------------------|------------------------------------------------------------|------------------|
| TC2200009262.hg.1 | 10.5  | 11.27 | -1.7  | 0.0024 | 0.0475 EIF3L                      | eukaryotic translation initiation factor 3, subunit L      | Multiple_Complex |
| TC0400012780.hg.1 | 8.7   | 8.27  | 1.35  | 0.0024 | 0.0475 PI4K2B                     | phosphatidylinositol 4-kinase type 2 beta                  | Multiple_Complex |
| TC1900007098.hg.1 | 5.69  | 5.2   | 1.41  | 0.0024 | 0.0476 RNASEH2A                   | ribonuclease H2, subunit A                                 | Multiple_Complex |
| TC0400011440.hg.1 | 11.93 | 12.57 | -1.56 | 0.0024 | 0.0476 PPP3CA                     | protein phosphatase 3, catalytic subunit, alpha isoform    | Multiple_Complex |
| TC0300014093.hg.1 | 9.36  | 9.9   | -1.46 | 0.0024 | 0.0478 PCYT1A                     | phosphate cytidylyltransferase 1, choline, alpha           | Multiple_Complex |
| TSUnmapped0000030 | 7.95  | 7.53  | 1.34  | 0.0024 | 0.0478 HYOU1                      | hypoxia up-regulated 1                                     | Coding           |
| TC1500006666.hg.1 | 7.78  | 7.47  | 1.24  | 0.0024 | 0.048 GOLGA8F; GOLGA8             | golgin A8 family, member F; golgin A8 family, member F     | Multiple_Complex |
| TC0300012403.hg.1 | 7.68  | 8.72  | -2.05 | 0.0024 | 0.0482 TMCC1                      | transmembrane and coiled-coil domain family 1              | Multiple_Complex |
| TC1100011410.hg.1 | 6.19  | 5.81  | 1.3   | 0.0024 | 0.0483 MRGPRF                     | MAS-related GPR, member F                                  | Coding           |
| TC1200007764.hg.1 | 9.13  | 7.65  | 2.78  | 0.0024 | 0.0483 ZNF385A                    | Memczak2013 ANTISENSE, CDS, coding, INTERNAL BE            | NonCoding        |
| TSUnmapped0000020 | 6.2   | 6.59  | -1.31 | 0.0025 | 0.0485 MLXIP                      | MLX interacting protein                                    | Coding           |
| TC0600013427.hg.1 | 7.88  | 7.53  | 1.28  | 0.0025 | 0.0485 FUCA2                      | fucoosidase, alpha-L- 2, plasma                            | Multiple_Complex |
| TC0300010399.hg.1 | 9.43  | 9.07  | 1.28  | 0.0025 | 0.0485 SH3BP5                     | SH3-domain binding protein 5 (BTK-associated)              | Multiple_Complex |
| TC0400012881.hg.1 | 4.8   | 5.4   | -1.51 | 0.0025 | 0.0485 DUX4                       | double homeobox 4                                          | Multiple_Complex |
| TC0900007129.hg.1 | 4.93  | 4.29  | 1.55  | 0.0025 | 0.0488 MELK                       | maternal embryonic leucine zipper kinase                   | Multiple_Complex |
| TC0100015200.hg.1 | 5.36  | 5.72  | -1.28 | 0.0025 | 0.0488 AMIGO1                     | adhesion molecule with Ig-like domain 1                    | Coding           |
| TC1100010991.hg.1 | 3.63  | 4.07  | -1.35 | 0.0025 | 0.0488 GIF                        | gastric intrinsic factor (vitamin B synthesis)             | Multiple_Complex |
| TC0600011282.hg.1 | 8.74  | 9.29  | -1.46 | 0.0025 | 0.0488 TRIM27                     | tripartite motif containing 27                             | Multiple_Complex |
| TC2200007138.hg.1 | 17.67 | 18.88 | -2.31 | 0.0025 | 0.0488 FBXO7                      | F-box protein 7                                            | Multiple_Complex |
| TC1600006566.hg.1 | 7.06  | 6.75  | 1.24  | 0.0025 | 0.0488 EME2                       | essential meiotic structure-specific endonuclease subunit  | Multiple_Complex |
| TC1400008940.hg.1 | 12.28 | 11.61 | 1.59  | 0.0025 | 0.0488 NFKBIA                     | nuclear factor of kappa light polypeptide gene enhancer    | Multiple_Complex |
| TC1500007174.hg.1 | 8.75  | 8.03  | 1.64  | 0.0025 | 0.0488 EID1                       | EP300 interacting inhibitor of differentiation 1           | Multiple_Complex |
| TC0500011754.hg.1 | 12.12 | 11.72 | 1.32  | 0.0025 | 0.0491 TMED7-TICAM2; TMED7-TICAM2 | readthrough; toll-like receptor adaptor                    | Multiple_Complex |
| TC0400008287.hg.1 | 7.97  | 8.88  | -1.88 | 0.0025 | 0.0493 CISD2                      | CDGSH iron sulfur domain 2                                 | Coding           |
| TC0400010780.hg.1 | 4.82  | 5.37  | -1.46 | 0.0025 | 0.0493 SPINK2                     | serine peptidase inhibitor, Kazal type 2 (acrosin-trypsin) | Multiple_Complex |
| TC1300007228.hg.1 | 8.49  | 8.92  | -1.34 | 0.0025 | 0.0493 WDFY2                      | WD repeat and FYVE domain containing 2                     | Multiple_Complex |
| TC1600009412.hg.1 | 9.87  | 9.58  | 1.22  | 0.0025 | 0.0493 TXNDC11                    | thioredoxin domain containing 11                           | Multiple_Complex |
| TC1600011483.hg.1 | 16.12 | 17.11 | -1.97 | 0.0025 | 0.0493 LITAF                      | lipopolysaccharide-induced TNF factor                      | Multiple_Complex |
| TC1900007950.hg.1 | 6.96  | 7.78  | -1.77 | 0.0025 | 0.0493 ZNF567                     | zinc finger protein 567                                    | Multiple_Complex |
| TC0100013432.hg.1 | 12.43 | 13.26 | -1.77 | 0.0025 | 0.0495 WASF2                      | WAS protein family, member 2                               | Multiple_Complex |
| TC0500009996.hg.1 | 8.08  | 7.66  | 1.34  | 0.0025 | 0.0495 NSUN2                      | NOP2/Sun RNA methyltransferase family, member 2            | Multiple_Complex |
| TC0800012308.hg.1 | 6.43  | 6.9   | -1.39 | 0.0026 | 0.0496 ADHFE1; C8orf46            | alcohol dehydrogenase, iron containing 1; chromosome       | Multiple_Complex |
| TC0600014246.hg.1 | 5.62  | 6.41  | -1.73 | 0.0026 | 0.0499 C6orf229                   | chromosome 6 open reading frame 229                        | Multiple_Complex |

Supplementary Table 7. Array accession numbers submitted at Gene Expression Omnibus (GEO), NCBI.  
Bioproject number: PRJNA737074

|                            |                         |
|----------------------------|-------------------------|
| <a href="#">GSM5374839</a> | S1 Symptomatic          |
| <a href="#">GSM5374840</a> | S2 Symptomatic          |
| <a href="#">GSM5374841</a> | S3 Symptomatic          |
| <a href="#">GSM5374843</a> | S5 Symptomatic          |
| <a href="#">GSM5374844</a> | S6 Symptomatic          |
| <a href="#">GSM5374845</a> | S7 Symptomatic          |
| <a href="#">GSM5374846</a> | S8 Symptomatic          |
| <a href="#">GSM5374847</a> | S9 Symptomatic          |
| <a href="#">GSM5374848</a> | S10 Symptomatic         |
| <a href="#">GSM5374849</a> | S11 Symptomatic         |
| <a href="#">GSM5374850</a> | S12 Asymptomatic        |
| <a href="#">GSM5374851</a> | S13 Asymptomatic        |
| <a href="#">GSM5374852</a> | S14 Asymptomatic        |
| <a href="#">GSM5374853</a> | S15 Asymptomatic        |
| <a href="#">GSM5374854</a> | S16 Asymptomatic        |
| <a href="#">GSM5374855</a> | S17 Asymptomatic        |
| <a href="#">GSM5374856</a> | S18 Asymptomatic        |
| <a href="#">GSM5374857</a> | S19 Asymptomatic        |
| <a href="#">GSM5374858</a> | S20 Asymptomatic        |
| <a href="#">GSM5374859</a> | S21 Asymptomatic        |
| <a href="#">GSM5374860</a> | S22 Asymptomatic        |
| <a href="#">GSM5374861</a> | S23 Asymptomatic        |
| <a href="#">GSM5374862</a> | S24 Asymptomatic        |
| <a href="#">GSM5374863</a> | S25 Asymptomatic        |
| <a href="#">GSM5374864</a> | S26 Asymptomatic        |
| <a href="#">GSM5374865</a> | S27 Asymptomatic        |
| <a href="#">GSM5374866</a> | S28 Asymptomatic        |
| <a href="#">GSM5374867</a> | S29 Asymptomatic        |
| <a href="#">GSM5374868</a> | S30 Uninfected controls |
| <a href="#">GSM5374869</a> | S31 Uninfected controls |
| <a href="#">GSM5374870</a> | S32 Uninfected controls |
| <a href="#">GSM5374871</a> | S33 Uninfected controls |
| <a href="#">GSM5374872</a> | S34 Uninfected controls |
| <a href="#">GSM5374873</a> | S35 Uninfected controls |
| <a href="#">GSM5374874</a> | S36 Uninfected controls |

|                                   |                         |
|-----------------------------------|-------------------------|
| <a href="#"><u>GSM5374875</u></a> | S37 Uninfected controls |
| <a href="#"><u>GSM5374876</u></a> | S38 Uninfected controls |
| <a href="#"><u>GSM5374877</u></a> | S39 Uninfected controls |
| <a href="#"><u>GSM5374878</u></a> | S40 Uninfected controls |
| <a href="#"><u>GSM5374879</u></a> | S41 Uninfected controls |
| <a href="#"><u>GSM5374880</u></a> | S42 Uninfected controls |
| <a href="#"><u>GSM5374881</u></a> | S43 Uninfected controls |
| <a href="#"><u>GSM5374882</u></a> | S44 Uninfected controls |
| <a href="#"><u>GSM5374883</u></a> | S45 Uninfected controls |
| <a href="#"><u>GSM5374884</u></a> | S46 Uninfected controls |
| <a href="#"><u>GSM5374885</u></a> | S47 Uninfected controls |
